# Supplementary material
Source: publisher site journal article supplement (doi:10.18632/aging.206048)
Supplement: Supplementary file 1 [file aging-v16-206048-supplementary-material-SD1.pdf]

SUPPLEMENTARY FIGURES

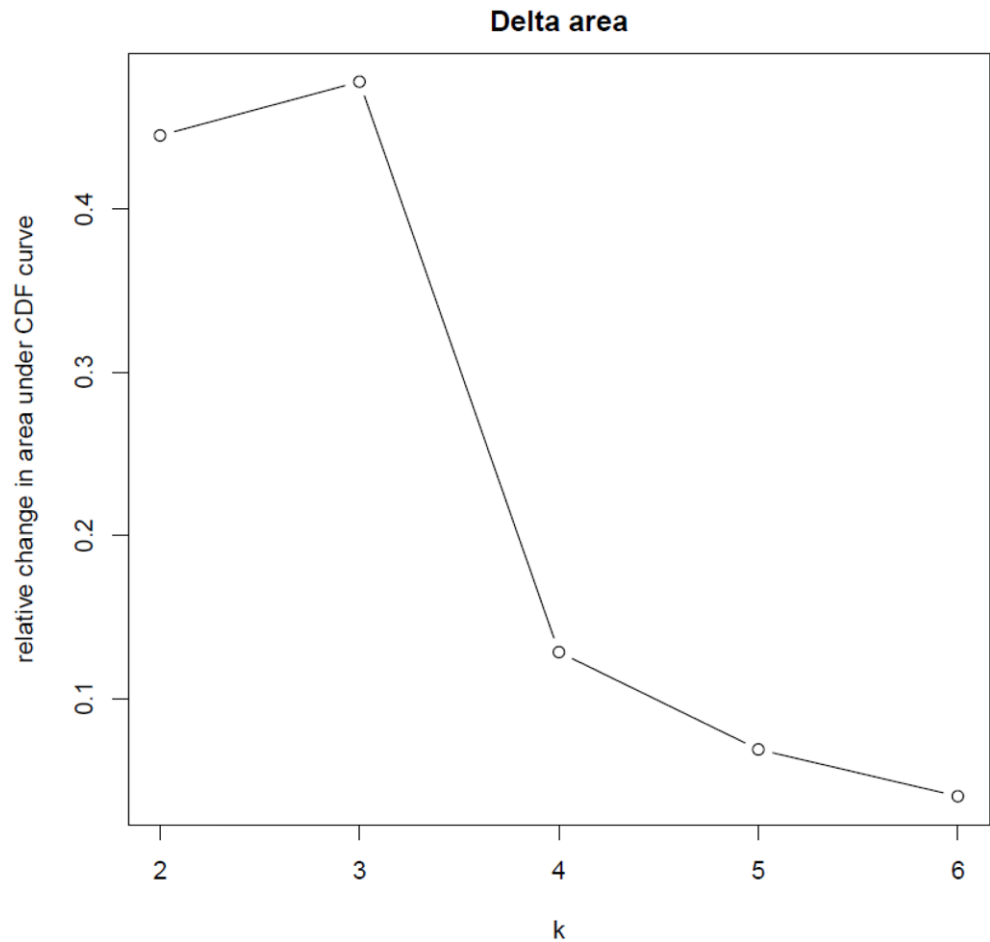

Supplementary Figure 1. Delta area plot showing the relative change in area under the cumulative distribution function (CDF) curve for different numbers of clusters ( $k$ ) in a consensus clustering analysis.

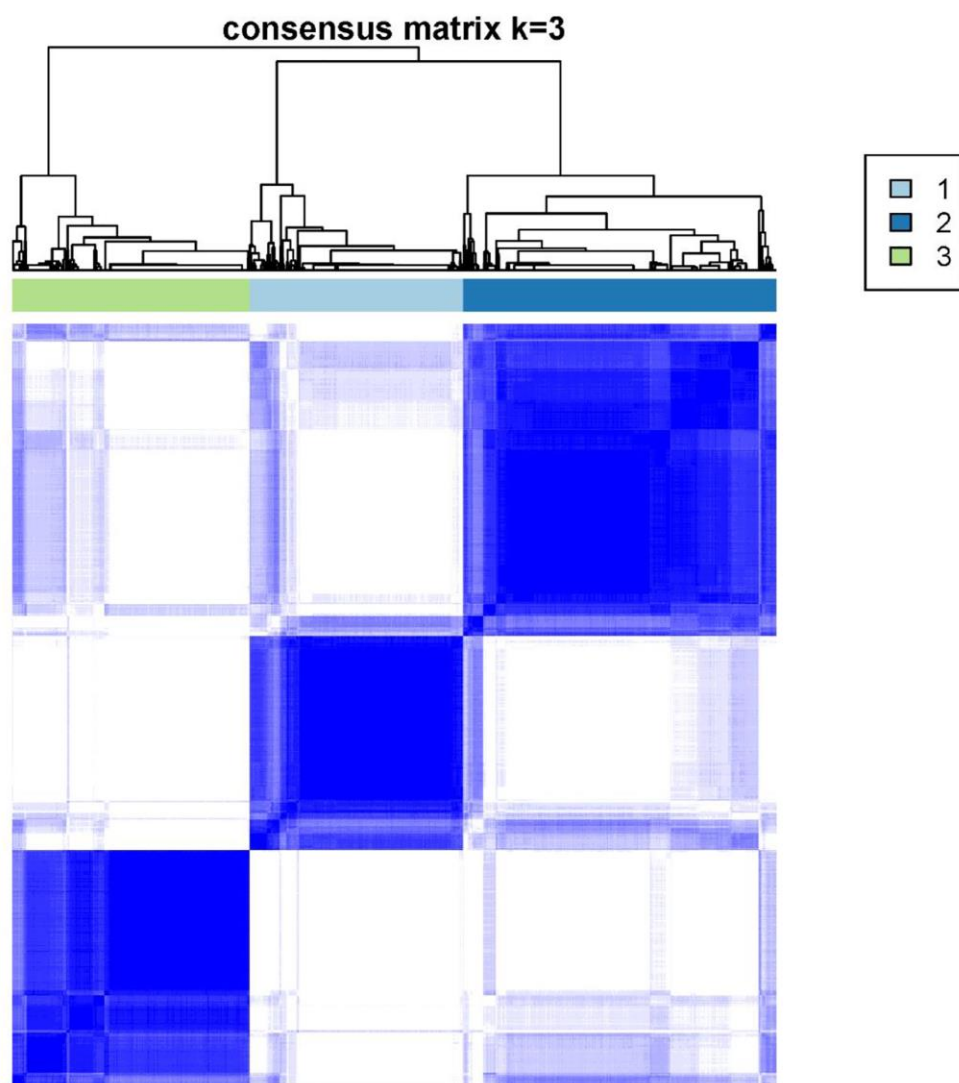

Supplementary Figure 2. Heatmap showing the consensus matrix for a clustering solution with  $k = 3$  clusters.

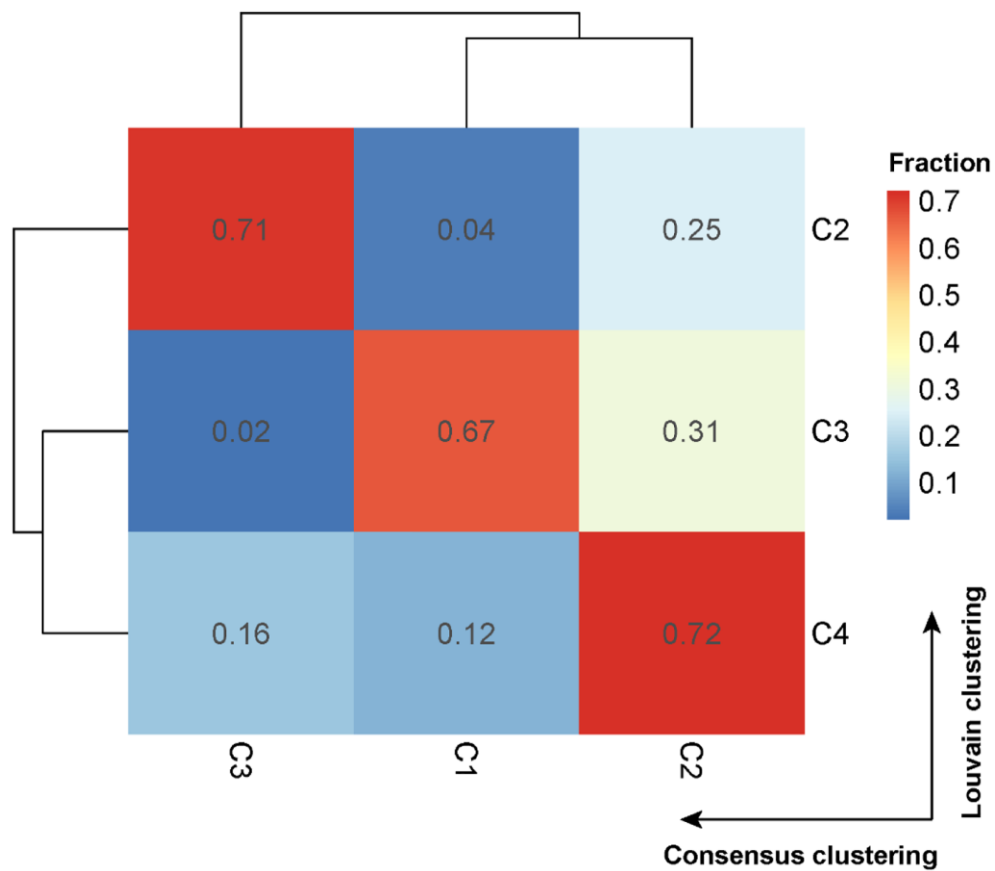

**Supplementary Figure 3. Heatmap showing the degree of consistency between the clusters identified by the Louvain algorithm and those identified by consensus clustering.** Each cell in the heatmap represents the agreement level for a pair of items regarding their cluster assignments across both methods.
