# Supplementary material
Source: publisher site journal article supplement (doi:10.18632/aging.206048)
Supplement: Supplementary file 1 [file aging-v16-206048-supplementary-material-SD2.xlsx]

## Sheet: Single-cell data of mouse lung
Supplementary Table 1. Summary of TB cohorts used in this study.
Barcode	orig.ident	nCount_RNA	nFeature_RNA	nCount_ADT	nFeature_ADT	nCount_HTO	nFeature_HTO	percent.mt	MULTI_ID	MULTI_classification	nCount_SCT	nFeature_SCT	Treatment	Batch	CellType
AAACCCACAGGCTATT_1	inf_1	9144	2176	107	4	798	3	2.77778	gfp-hi	gfp-hi	2676	1092	Infected	Batch1	IM_3
AAACCCAGTCCTACGG_1	inf_1	1340	694	121	4	372	3	24.9254	gfp-hi	gfp-hi	2014	714	Infected	Batch1	IM_1
AAACGAACAAGCGGAT_1	inf_1	859	421	269	4	263	3	0.931315	gfp-hi	gfp-hi	2061	526	Infected	Batch1	Neutrophils
AAACGCTCATCTAACG_1	inf_1	4381	1891	153	4	953	3	13.8096	gfp-hi	gfp-hi	3032	1816	Infected	Batch1	Macrophages/T-cells
AAAGGATCATTCTGTT_1	inf_1	1966	898	101	4	492	3	17.3957	gfp-hi	gfp-hi	2246	898	Infected	Batch1	IM_4
AACAAAGCAGTGTACT_1	inf_1	3578	1218	617	4	1193	3	17.8312	gfp-hi	gfp-hi	2771	1218	Infected	Batch1	AM_3
AACAACCGTCATTCCC_1	inf_1	3697	1458	207	4	424	3	15.9859	gfp-hi	gfp-hi	2867	1436	Infected	Batch1	IM_3
AACAACCGTTAGAAGT_1	inf_1	624	318	322	4	529	3	11.859	gfp-hi	gfp-hi	1950	496	Infected	Batch1	Neutrophils
AACAGGGTCGTCGATA_1	inf_1	3184	1398	87	4	220	3	2.41834	gfp-hi	gfp-hi	2793	1398	Infected	Batch1	Monocytes
AACCAACGTAATGCGG_1	inf_1	2671	1155	105	4	459	3	7.076	gfp-hi	gfp-hi	2593	1155	Infected	Batch1	IM_1
AACCCAACACAACATC_1	inf_1	608	334	268	4	285	3	2.30263	gfp-hi	gfp-hi	1784	502	Infected	Batch1	Neutrophils
AACCTGATCGCGATCG_1	inf_1	6907	2120	1073	4	1482	3	10.6703	gfp-hi	gfp-hi	3004	1567	Infected	Batch1	IM_3
AACCTTTCACCAGGTC_1	inf_1	3747	1475	51	4	551	3	6.40512	gfp-hi	gfp-hi	2852	1461	Infected	Batch1	IM_2
AACCTTTGTAGGTGCA_1	inf_1	2849	1167	1466	4	1400	3	0.4563	gfp-hi	gfp-hi	2678	1165	Infected	Batch1	Neutrophils
AACCTTTGTCGAATTC_1	inf_1	1026	645	144	4	673	3	8.2846	gfp-hi	gfp-hi	2049	717	Infected	Batch1	Neutrophils
AACGAAAAGTGCGCTC_1	inf_1	2776	1146	80	4	666	3	16.9669	gfp-hi	gfp-hi	2627	1146	Infected	Batch1	IM_3
AACGGGATCCATTTAC_1	inf_1	11506	2918	2616	4	1570	3	8.8997	gfp-hi	gfp-hi	2553	1214	Infected	Batch1	AM_1
AACTTCTCATAGATCC_1	inf_1	710	310	252	4	351	3	1.97183	gfp-hi	gfp-hi	1854	457	Infected	Batch1	Neutrophils
AAGAACACAATCAAGA_1	inf_1	2914	1321	183	4	1110	3	10.0892	gfp-hi	gfp-hi	2705	1321	Infected	Batch1	AM_1
AAGCATCTCGAAGTGG_1	inf_1	1018	511	121	4	702	3	27.8978	gfp-hi	gfp-hi	2161	590	Infected	Batch1	IM_1
AAGTGAAAGAGTAACT_1	inf_1	7752	2123	205	4	865	3	10.2941	gfp-hi	gfp-hi	2870	1384	Infected	Batch1	IM_3
AAGTTCGTCAACCTTT_1	inf_1	7111	1863	247	4	1343	3	17.3534	gfp-hi	gfp-hi	2879	1305	Infected	Batch1	IM_3
AATCGTGAGTGGTTCT_1	inf_1	3056	1266	67	4	323	3	3.07592	gfp-hi	gfp-hi	2724	1265	Infected	Batch1	Monocytes
AATGAAGAGAGTAACT_1	inf_1	6446	1661	176	4	833	3	6.34502	gfp-hi	gfp-hi	2881	1260	Infected	Batch1	IM_3
AATGAAGGTTTCCAAG_1	inf_1	5426	1360	2393	4	1548	3	37.8916	gfp-hi	gfp-hi	2843	1137	Infected	Batch1	IM_1
AATGAAGTCCAACCGG_1	inf_1	965	392	180	4	225	2	36.2694	gfp-hi	gfp-hi	2229	462	Infected	Batch1	AM_2
AATGACCCAAGAATGT_1	inf_1	3924	1606	88	4	630	3	7.92559	gfp-hi	gfp-hi	2937	1578	Infected	Batch1	IM_3
AATGGAAGTACCAATC_1	inf_1	7553	2041	215	4	841	3	8.27486	gfp-hi	gfp-hi	2970	1459	Infected	Batch1	IM_2
AATGGAATCGCGTGCA_1	inf_1	669	393	13	3	122	3	9.86547	gfp-hi	gfp-hi	1985	495	Infected	Batch1	IM_4
AATTTCCGTTCCTAGA_1	inf_1	5078	1661	231	4	999	3	13.1351	gfp-hi	gfp-hi	2974	1510	Infected	Batch1	IM_3
ACACAGTAGGGAGTTC_1	inf_1	7590	2449	231	4	1574	3	4.16337	gfp-hi	gfp-hi	3038	1758	Infected	Batch1	AM_4
ACACGCGCAGACCATT_1	inf_1	1661	897	80	4	409	3	4.39494	gfp-hi	gfp-hi	2103	897	Infected	Batch1	Monocytes
ACACGCGTCGGAAGGT_1	inf_1	696	360	109	4	74	3	2.01149	gfp-hi	gfp-hi	2046	473	Infected	Batch1	AM_3
ACACGCGTCTACTCAT_1	inf_1	1541	687	28	4	395	3	25.3082	gfp-hi	gfp-hi	2162	686	Infected	Batch1	AM_2
ACACTGATCTGGGCAC_1	inf_1	5293	1873	100	3	621	3	9.97544	gfp-hi	gfp-hi	3025	1677	Infected	Batch1	IM_3
ACAGGGAGTAGCTTTG_1	inf_1	5317	1797	931	4	1237	3	20.2558	gfp-hi	gfp-hi	2988	1569	Infected	Batch1	AM_4
ACATCCCCAAAGGAGA_1	inf_1	2011	874	80	4	508	3	11.7852	gfp-hi	gfp-hi	2244	874	Infected	Batch1	IM_1
ACCAAACGTACGGTTT_1	inf_1	913	525	213	4	559	3	28.2585	gfp-hi	gfp-hi	2093	651	Infected	Batch1	IM_1
ACCAACACATTACGGT_1	inf_1	1526	870	37	3	293	3	5.63565	gfp-hi	gfp-hi	2068	870	Infected	Batch1	Monocytes
ACCAACAGTGTAACGG_1	inf_1	5110	1838	400	4	1582	3	6.26223	gfp-hi	gfp-hi	2999	1672	Infected	Batch1	AM_1
ACCAACATCACCCTTG_1	inf_1	2851	1411	130	4	675	3	13.013	gfp-hi	gfp-hi	2703	1406	Infected	Batch1	IM_1
ACCATTTTCGGACAAG_1	inf_1	3567	1329	143	4	808	3	13.9052	gfp-hi	gfp-hi	2819	1327	Infected	Batch1	IM_3
ACCCAAAAGATTGGGC_1	inf_1	2871	1287	137	4	688	3	17.8683	gfp-hi	gfp-hi	2673	1286	Infected	Batch1	IM_2
ACCGTTCCAATGCAGG_1	inf_1	657	344	92	4	87	3	1.97869	gfp-hi	gfp-hi	2055	458	Infected	Batch1	IM_4
ACCGTTCGTCTTTCTA_1	inf_1	9890	3073	304	4	1272	3	11.729	gfp-hi	gfp-hi	2766	1557	Infected	Batch1	AM_4
ACCTGAAAGACGATAT_1	inf_1	2715	1320	73	4	320	3	3.31492	gfp-hi	gfp-hi	2625	1320	Infected	Batch1	Monocytes
ACGATCAAGCCTCAAT_1	inf_1	3677	1507	117	4	395	3	8.15883	gfp-hi	gfp-hi	2892	1497	Infected	Batch1	IM_3
ACGATCAGTGACATCT_1	inf_1	3482	1335	192	4	925	3	11.7748	gfp-hi	gfp-hi	2833	1333	Infected	Batch1	IM_1
ACGATCATCGCGGACT_1	inf_1	747	394	219	4	282	3	1.07095	gfp-hi	gfp-hi	1904	533	Infected	Batch1	Neutrophils
ACGCACGCACAAGTGG_1	inf_1	12050	2458	138	4	846	3	7.17012	gfp-hi	gfp-hi	2644	978	Infected	Batch1	IM_2
ACGGAAGAGCATCAGG_1	inf_1	685	328	36	3	338	3	27.0073	gfp-hi	gfp-hi	2005	478	Infected	Batch1	IM_1
ACGGTCGAGCTAGAGC_1	inf_1	1867	763	151	4	624	3	32.7263	gfp-hi	gfp-hi	2231	763	Infected	Batch1	AM_2
ACGTAACTCACAAGGG_1	inf_1	1839	1006	85	4	595	3	4.5677	gfp-hi	gfp-hi	2127	1006	Infected	Batch1	Macrophages/T-cells
ACGTACATCGCGGACT_1	inf_1	629	393	88	4	647	3	21.6216	gfp-hi	gfp-hi	1925	543	Infected	Batch1	AM_2
ACGTAGTAGGCATGGT_1	inf_1	1792	933	102	4	330	3	4.40848	gfp-hi	gfp-hi	2146	930	Infected	Batch1	Monocytes
ACGTAGTCATGTTCAG_1	inf_1	4047	1277	113	4	359	3	10.9711	gfp-hi	gfp-hi	2854	1233	Infected	Batch1	IM_3
ACGTAGTTCGTTCTAT_1	inf_1	1367	748	85	4	404	3	16.8983	gfp-hi	gfp-hi	2026	749	Infected	Batch1	IM_1
ACTACGAGTACCTATG_1	inf_1	978	465	370	4	488	3	1.12474	gfp-hi	gfp-hi	2105	560	Infected	Batch1	Neutrophils
ACTATCTGTAGAGATT_1	inf_1	4179	1696	347	4	721	3	16.7983	gfp-hi	gfp-hi	2947	1622	Infected	Batch1	AM_1
ACTATTCGTGAGATTA_1	inf_1	1906	989	250	4	570	3	2.36097	gfp-hi	gfp-hi	2173	988	Infected	Batch1	Monocytes
ACTCTCGAGCTGCCTG_1	inf_1	2390	1363	454	4	617	3	4.26778	gfp-hi	gfp-hi	2398	1363	Infected	Batch1	IM_3
ACTGCAAAGAGAGTTT_1	inf_1	1849	572	1436	4	919	3	36.8307	gfp-hi	gfp-hi	2254	571	Infected	Batch1	Neutrophils
ACTGTGATCTTGTTAC_1	inf_1	6998	2193	490	4	1437	3	6.90197	gfp-hi	gfp-hi	3027	1654	Infected	Batch1	AM_1
ACTTAGGAGAAAGCGA_1	inf_1	2565	1135	149	4	721	3	16.8031	gfp-hi	gfp-hi	2534	1133	Infected	Batch1	Macrophages/B-cells
ACTTAGGAGCCGTTGC_1	inf_1	501	311	320	4	374	3	3.59281	gfp-hi	gfp-hi	1767	510	Infected	Batch1	Neutrophils
ACTTCCGGTGAGAGGG_1	inf_1	1577	539	252	4	855	3	26.0621	gfp-hi	gfp-hi	2118	539	Infected	Batch1	Macrophages/B-cells
ACTTCCGTCTCCTGAC_1	inf_1	8947	2779	87	4	977	3	4.80608	gfp-hi	gfp-hi	2849	1581	Infected	Batch1	IM_3
ACTTCGCAGGTTGCCC_1	inf_1	3640	1278	197	4	1204	3	12.1703	gfp-hi	gfp-hi	2802	1274	Infected	Batch1	AM_3
ACTTTGTGTAAGTAGT_1	inf_1	534	380	70	4	239	3	10.8614	gfp-hi	gfp-hi	1763	577	Infected	Batch1	Monocytes
AGAACAATCGTCGATA_1	inf_1	711	377	372	3	429	3	1.26582	gfp-hi	gfp-hi	1911	515	Infected	Batch1	Neutrophils
AGAAGCGCAGTTCACA_1	inf_1	4099	1440	736	4	1246	3	19.2974	gfp-hi	gfp-hi	2879	1392	Infected	Batch1	IM_1
AGACAAAGTTGAGTCT_1	inf_1	2079	714	370	4	1154	3	38.5281	gfp-hi	gfp-hi	2296	712	Infected	Batch1	IM_1
AGACACTCAGCATACT_1	inf_1	5800	2244	152	4	1006	3	3.72414	gfp-hi	gfp-hi	3240	1968	Infected	Batch1	Macrophages/T-cells
AGACCATTCCGCACGA_1	inf_1	4606	1642	1912	4	1415	3	10.6817	gfp-hi	gfp-hi	2951	1555	Infected	Batch1	AM_1
AGACCCGGTCTGTGGC_1	inf_1	5474	1801	724	4	1747	3	32.9375	gfp-hi	gfp-hi	2985	1545	Infected	Batch1	AM_1
AGAGAATAGATACGAT_1	inf_1	1138	337	143	4	251	3	0.966608	gfp-hi	gfp-hi	2169	409	Infected	Batch1	Neutrophils
AGAGAGCTCACGTAGT_1	inf_1	1674	840	160	4	734	3	15.7706	gfp-hi	gfp-hi	2136	840	Infected	Batch1	IM_1
AGAGCCCCACAGCTGC_1	inf_1	15003	3298	127	4	761	3	2.56615	gfp-hi	gfp-hi	2679	1322	Infected	Batch1	AM_1
AGAGCCCGTGAAGCTG_1	inf_1	600	351	96	4	288	3	19.8333	gfp-hi	gfp-hi	1920	505	Infected	Batch1	IM_4
AGATAGAGTTCTCGTC_1	inf_1	683	329	192	4	244	3	1.46413	gfp-hi	gfp-hi	1873	481	Infected	Batch1	Neutrophils
AGATCGTTCAAGTTGC_1	inf_1	3006	1125	619	4	1358	3	31.4039	gfp-hi	gfp-hi	2693	1125	Infected	Batch1	IM_1
AGATCGTTCACCCATC_1	inf_1	2347	1103	78	4	391	3	4.00511	gfp-hi	gfp-hi	2376	1103	Infected	Batch1	Monocytes
AGATGCTGTCTCCCTA_1	inf_1	8182	2462	181	4	582	3	8.07871	gfp-hi	gfp-hi	2987	1618	Infected	Batch1	AM_1
AGATGCTGTTCTAACG_1	inf_1	4930	984	90	4	315	3	1.62272	gfp-hi	gfp-hi	3285	854	Infected	Batch1	Macrophages/B-cells
AGATGCTTCATGGATC_1	inf_1	737	444	79	3	245	3	11.8046	gfp-hi	gfp-hi	1994	537	Infected	Batch1	IM_4
AGCATCACACTAGTAC_1	inf_1	5030	1396	578	4	1193	3	25.1889	gfp-hi	gfp-hi	2845	1220	Infected	Batch1	IM_3
AGCATCAGTCTATGAC_1	inf_1	2652	1150	46	4	234	3	11.5762	gfp-hi	gfp-hi	2586	1149	Infected	Batch1	IM_2
AGCATCATCCGATCTC_1	inf_1	1857	898	90	4	459	3	8.83145	gfp-hi	gfp-hi	2151	897	Infected	Batch1	IM_1
AGCCAATTCCGGTAGC_1	inf_1	7864	2510	77	4	420	3	5.21363	gfp-hi	gfp-hi	3061	1699	Infected	Batch1	IM_3
AGCCAGCCATCGGATT_1	inf_1	753	225	113	4	130	3	0.929615	gfp-hi	gfp-hi	1746	376	Infected	Batch1	Macrophages/B-cells
AGCGATTGTACGACAG_1	inf_1	2691	977	120	4	723	3	18.4318	gfp-hi	gfp-hi	2575	977	Infected	Batch1	IM_4
AGCGCTGGTGTTGATC_1	inf_1	1065	489	489	4	766	3	1.22066	gfp-hi	gfp-hi	2038	570	Infected	Batch1	Neutrophils
AGCTACAAGAGTGAAG_1	inf_1	3443	1161	132	4	1333	3	20.1278	gfp-hi	gfp-hi	2752	1161	Infected	Batch1	IM_4
AGCTACAAGCTCGCAC_1	inf_1	1650	877	113	4	635	3	20.9697	gfp-hi	gfp-hi	2084	877	Infected	Batch1	IM_1
AGCTCAACAATGTCTG_1	inf_1	1423	639	95	4	545	3	34.7154	gfp-hi	gfp-hi	2142	639	Infected	Batch1	AM_2
AGCTCAAGTCGTTGGC_1	inf_1	1886	802	51	4	276	3	11.0817	gfp-hi	gfp-hi	2225	801	Infected	Batch1	IM_2
AGCTCAAGTTAGAAGT_1	inf_1	9952	2450	190	4	1030	3	11.244	gfp-hi	gfp-hi	2629	1120	Infected	Batch1	IM_2
AGCTTCCCATTAGGAA_1	inf_1	949	486	80	4	233	3	15.3846	gfp-hi	gfp-hi	2185	534	Infected	Batch1	AM_2
AGGAATAAGATGGGCT_1	inf_1	1473	796	596	4	339	3	11.5411	gfp-hi	gfp-hi	2096	796	Infected	Batch1	Monocytes
AGGACGAAGCAGGCAT_1	inf_1	1372	776	134	4	381	3	17.4198	gfp-hi	gfp-hi	2031	778	Infected	Batch1	IM_1
AGGACGACAAGCTGCC_1	inf_1	6115	1482	240	4	1398	3	14.489	gfp-hi	gfp-hi	2877	1189	Infected	Batch1	IM_3
AGGACGACAGTATGAA_1	inf_1	2317	836	1022	4	1389	3	1.55373	gfp-hi	gfp-hi	2369	834	Infected	Batch1	Neutrophils
AGGACTTCAGCAGTAG_1	inf_1	535	284	168	4	304	3	3.17757	gfp-hi	gfp-hi	1779	494	Infected	Batch1	Neutrophils
AGGACTTTCGGACTTA_1	inf_1	1281	819	141	4	209	3	4.7619	gfp-hi	gfp-hi	1967	831	Infected	Batch1	Monocytes
AGGCATTAGCAGGCAT_1	inf_1	11035	3036	639	4	1392	3	11.0557	gfp-hi	gfp-hi	2620	1299	Infected	Batch1	AM_4
AGGCATTCAAGCACAG_1	inf_1	1423	675	108	4	295	3	33.6613	gfp-hi	gfp-hi	2109	677	Infected	Batch1	IM_1
AGGCATTTCCTGTACC_1	inf_1	12200	2902	134	4	1026	3	4.80328	gfp-hi	gfp-hi	2662	1212	Infected	Batch1	IM_3
AGGGAGTAGGGTCAAC_1	inf_1	2112	933	152	4	1046	3	11.0795	gfp-hi	gfp-hi	2286	933	Infected	Batch1	AM_3
AGGGCCTAGGCATGGT_1	inf_1	3412	1362	59	4	700	3	7.94256	gfp-hi	gfp-hi	2792	1361	Infected	Batch1	IM_2
AGGGTCCCATTGGGAG_1	inf_1	1872	836	159	4	796	3	16.1859	gfp-hi	gfp-hi	2200	835	Infected	Batch1	IM_1
AGGGTGAGTTCAACGT_1	inf_1	8774	2055	133	4	443	3	3.24823	gfp-hi	gfp-hi	2744	1137	Infected	Batch1	IM_3
AGGGTTTGTATTGGCT_1	inf_1	9309	2648	394	4	991	3	3.37308	gfp-hi	gfp-hi	2706	1366	Infected	Batch1	IM_2
AGGTAGGAGATGCGAC_1	inf_1	670	333	271	4	469	3	39.7015	gfp-hi	gfp-hi	1998	509	Infected	Batch1	IM_1
AGGTCATCAAATCGTC_1	inf_1	2756	1232	96	4	319	3	3.99129	gfp-hi	gfp-hi	2629	1232	Infected	Batch1	Monocytes
AGGTCTACAAGTGATA_1	inf_1	1258	713	60	3	309	3	17.3291	gfp-hi	gfp-hi	1988	720	Infected	Batch1	DC.103+11B-
AGGTTACTCTGCCTGT_1	inf_1	2981	1208	95	4	354	3	6.64207	gfp-hi	gfp-hi	2687	1206	Infected	Batch1	IM_2
AGGTTGTGTCTGTGAT_1	inf_1	2275	1115	108	4	397	3	13.7582	gfp-hi	gfp-hi	2344	1115	Infected	Batch1	IM_3
AGTACCATCTGCGGGT_1	inf_1	5236	1660	131	4	408	3	3.9725	gfp-hi	gfp-hi	3011	1481	Infected	Batch1	IM_3
AGTAGCTAGCAAGCCA_1	inf_1	867	517	616	3	749	3	1.26874	gfp-hi	gfp-hi	1930	621	Infected	Batch1	Neutrophils
AGTCATGTCAACCGAT_1	inf_1	1273	672	73	4	360	3	10.055	gfp-hi	gfp-hi	2074	674	Infected	Batch1	Monocytes
AGTCATGTCCAGCACG_1	inf_1	1073	651	189	4	395	3	5.31221	gfp-hi	gfp-hi	2052	676	Infected	Batch1	Monocytes
AGTGATCCAGAACCGA_1	inf_1	1170	787	64	4	366	3	2.90598	gfp-hi	gfp-hi	1961	802	Infected	Batch1	Monocytes
AGTGATCCATCCGATA_1	inf_1	2984	1047	98	4	377	3	5.99866	gfp-hi	gfp-hi	2666	1047	Infected	Batch1	IM_1
AGTGATCGTAGTCGTT_1	inf_1	8641	1752	90	4	369	3	0.0925819	gfp-hi	gfp-hi	2705	1008	Infected	Batch1	IM_3
AGTGATCTCCTAACAG_1	inf_1	1738	805	112	4	467	3	10.2992	gfp-hi	gfp-hi	2162	805	Infected	Batch1	IM_2
AGTTAGCAGTCTGCGC_1	inf_1	12400	2926	1257	4	1708	3	8.42742	gfp-hi	gfp-hi	2616	1177	Infected	Batch1	Neutrophils
AGTTAGCCACCGAATT_1	inf_1	2712	1185	73	4	473	3	6.19469	gfp-hi	gfp-hi	2615	1185	Infected	Batch1	Monocytes
AGTTAGCTCACTGGTA_1	inf_1	9651	2482	2340	4	2635	3	32.6598	gfp-hi	gfp-hi	2565	1096	Infected	Batch1	IM_2
AGTTCCCTCACGGGAA_1	inf_1	1832	855	128	4	544	3	7.09607	gfp-hi	gfp-hi	2142	855	Infected	Batch1	IM_1
AGTTCCCTCAGAGTGG_1	inf_1	7849	2305	505	4	1042	3	4.26806	gfp-hi	gfp-hi	2947	1555	Infected	Batch1	IM_3
ATACCGACATAGCTGT_1	inf_1	2141	820	539	4	1525	3	34.5633	gfp-hi	gfp-hi	2312	820	Infected	Batch1	AM_2
ATACTTCGTAATTAGG_1	inf_1	2433	918	78	4	459	3	8.63132	gfp-hi	gfp-hi	2439	918	Infected	Batch1	IM_1
ATAGACCGTGTGTCGC_1	inf_1	13712	3011	269	4	1126	3	13.0543	gfp-hi	gfp-hi	2606	1125	Infected	Batch1	AM_1
ATAGACCGTTGAATCC_1	inf_1	1226	591	96	4	412	3	18.9233	gfp-hi	gfp-hi	1981	649	Infected	Batch1	IM_1
ATATCCTAGTGGGAAA_1	inf_1	2161	996	54	4	520	3	10.6895	gfp-hi	gfp-hi	2305	995	Infected	Batch1	IM_3
ATATCCTCAGCTGTCG_1	inf_1	6243	2133	153	4	1157	3	12.9585	gfp-hi	gfp-hi	3114	1770	Infected	Batch1	IM_1
ATATCCTTCCAAATGC_1	inf_1	10466	2350	141	4	1392	3	11.1122	gfp-hi	gfp-hi	2579	1033	Infected	Batch1	AM_1
ATCACGACAGCATCTA_1	inf_1	3592	1289	230	4	1205	3	17.6503	gfp-hi	gfp-hi	2770	1285	Infected	Batch1	AM_3
ATCAGGTCAATCGCCG_1	inf_1	7919	1995	718	4	1610	3	12.1985	gfp-hi	gfp-hi	2904	1285	Infected	Batch1	IM_3
ATCATTCCAATTGCGT_1	inf_1	1552	885	348	4	1144	3	13.8531	gfp-hi	gfp-hi	2093	885	Infected	Batch1	AM_1
ATCATTCGTACCTAAC_1	inf_1	1122	537	595	4	657	3	1.3369	gfp-hi	gfp-hi	2016	595	Infected	Batch1	Neutrophils
ATCCACCAGTCGCGAA_1	inf_1	1106	549	9	3	169	3	8.31826	gfp-hi	gfp-hi	2115	572	Infected	Batch1	IM_4
ATCCATTCAACCGATT_1	inf_1	3620	1431	381	4	1338	3	9.41989	gfp-hi	gfp-hi	2846	1424	Infected	Batch1	IM_3
ATCCATTGTATGCTTG_1	inf_1	2692	1041	560	4	1335	3	22.6226	gfp-hi	gfp-hi	2584	1041	Infected	Batch1	AM_3
ATCCCTGGTGACTCGC_1	inf_1	910	483	460	4	403	3	1.86813	gfp-hi	gfp-hi	2020	589	Infected	Batch1	Neutrophils
ATCCGTCCATAACCCA_1	inf_1	3415	1410	69	4	383	3	3.04539	gfp-hi	gfp-hi	2857	1409	Infected	Batch1	Monocytes
ATCCTATGTATGACAA_1	inf_1	3845	1461	84	4	631	3	6.63199	gfp-hi	gfp-hi	2906	1446	Infected	Batch1	IM_2
ATCGGATTCGAGCCAC_1	inf_1	1687	607	665	4	801	3	2.25252	gfp-hi	gfp-hi	2156	606	Infected	Batch1	Neutrophils
ATCGGCGTCTTTACAC_1	inf_1	865	480	138	4	482	3	20.3468	gfp-hi	gfp-hi	1994	611	Infected	Batch1	IM_1
ATCGTAGCAGGCTATT_1	inf_1	677	457	79	4	264	3	9.74889	gfp-hi	gfp-hi	1854	605	Infected	Batch1	Monocytes
ATCGTAGGTAGTACGG_1	inf_1	3684	1266	221	4	1419	3	15.6895	gfp-hi	gfp-hi	2794	1262	Infected	Batch1	AM_3
ATCGTCCAGATCCCAT_1	inf_1	674	446	53	4	363	3	18.6944	gfp-hi	gfp-hi	1916	579	Infected	Batch1	Monocytes
ATCGTGACATCCCACT_1	inf_1	3006	1286	217	4	1198	3	9.3147	gfp-hi	gfp-hi	2718	1286	Infected	Batch1	AM_3
ATCGTGATCTCGCCTA_1	inf_1	3669	1136	76	4	593	3	3.70673	gfp-hi	gfp-hi	2757	1128	Infected	Batch1	IM_2
ATCTCTAAGGCCACTC_1	inf_1	974	536	162	4	582	3	31.5195	gfp-hi	gfp-hi	2120	634	Infected	Batch1	AM_2
ATCTCTAGTAGCGAGT_1	inf_1	1407	725	60	4	525	3	16.0625	gfp-hi	gfp-hi	2057	724	Infected	Batch1	DC.103+11B-
ATCTCTAGTCCTCATC_1	inf_1	2518	1192	46	4	432	3	7.0691	gfp-hi	gfp-hi	2512	1192	Infected	Batch1	Monocytes
ATCTCTAGTGTTGATC_1	inf_1	855	529	296	4	489	3	9.59064	gfp-hi	gfp-hi	1992	611	Infected	Batch1	Monocytes
ATGAAAGTCAAACGTC_1	inf_1	4156	1750	329	4	1270	3	15.9528	gfp-hi	gfp-hi	2960	1704	Infected	Batch1	Macrophages/T-cells
ATGATCGGTTTCTTAC_1	inf_1	1459	747	306	4	845	3	19.0541	gfp-hi	gfp-hi	2068	748	Infected	Batch1	Neutrophils
ATGATCGTCTGGTGCG_1	inf_1	1358	509	248	4	995	3	30.3387	gfp-hi	gfp-hi	2178	512	Infected	Batch1	IM_1
ATGCATGCAGGGAATC_1	inf_1	1580	700	137	4	892	3	24.4304	gfp-hi	gfp-hi	2135	700	Infected	Batch1	IM_1
ATGCATGTCATGAAAG_1	inf_1	3499	1387	876	4	1106	3	12.1749	gfp-hi	gfp-hi	2829	1386	Infected	Batch1	IM_3
ATGCGATTCCGCAGTG_1	inf_1	4756	1647	117	4	533	3	6.11859	gfp-hi	gfp-hi	2979	1524	Infected	Batch1	IM_2
ATGGAGGAGACGCATG_1	inf_1	7167	1943	147	4	960	3	8.80424	gfp-hi	gfp-hi	2926	1401	Infected	Batch1	AM_3
ATGGATCAGTGGCGAT_1	inf_1	11003	2900	325	4	995	3	8.39771	gfp-hi	gfp-hi	2519	1177	Infected	Batch1	AM_1
ATGGATCTCAGAGCGA_1	inf_1	1369	669	101	4	606	3	22.4982	gfp-hi	gfp-hi	2137	670	Infected	Batch1	IM_1
ATGGGTTGTGCTTATG_1	inf_1	5004	1548	83	4	221	3	7.494	gfp-hi	gfp-hi	2972	1399	Infected	Batch1	IM_2
ATGGTTGCAACCAGAG_1	inf_1	1632	939	58	4	587	3	6.18873	gfp-hi	gfp-hi	2078	939	Infected	Batch1	Monocytes
ATTACCTCAACTGCTA_1	inf_1	1674	798	106	4	260	3	29.3907	gfp-hi	gfp-hi	2134	798	Infected	Batch1	IM_1
ATTACCTCACCCTGTT_1	inf_1	2766	1091	104	4	553	3	16.5582	gfp-hi	gfp-hi	2629	1090	Infected	Batch1	IM_1
ATTATCCAGGCCCAAA_1	inf_1	2531	1050	132	4	935	3	9.87752	gfp-hi	gfp-hi	2513	1049	Infected	Batch1	AM_3
ATTATCCTCAATGTCG_1	inf_1	2076	839	87	4	640	3	12.4277	gfp-hi	gfp-hi	2283	839	Infected	Batch1	IM_3
ATTCACTTCAGTGTTG_1	inf_1	758	387	10	3	124	3	28.1003	gfp-hi	gfp-hi	2091	509	Infected	Batch1	AM_2
ATTCATCGTTCTCGTC_1	inf_1	679	449	77	4	168	3	9.86745	gfp-hi	gfp-hi	1890	572	Infected	Batch1	IM_1
ATTCCATCATTGAGGG_1	inf_1	834	527	64	4	302	3	12.5899	gfp-hi	gfp-hi	1971	634	Infected	Batch1	Monocytes
ATTGGGTGTTTCCAAG_1	inf_1	862	513	103	4	269	3	10.7889	gfp-hi	gfp-hi	1975	648	Infected	Batch1	IM_1
ATTTCACGTTACTCAG_1	inf_1	1578	922	65	4	299	3	5.19645	gfp-hi	gfp-hi	2065	922	Infected	Batch1	Monocytes
CAAAGAAAGTCACAGG_1	inf_1	1296	656	113	4	466	3	21.2191	gfp-hi	gfp-hi	2097	665	Infected	Batch1	IM_1
CAACAACGTTGAGGAC_1	inf_1	5927	1737	268	4	1290	3	13.7675	gfp-hi	gfp-hi	2949	1435	Infected	Batch1	AM_1
CAACAACTCTCGAACA_1	inf_1	6839	1750	58	4	338	3	2.25179	gfp-hi	gfp-hi	2910	1298	Infected	Batch1	IM_3
CAACAGTCACTAGAGG_1	inf_1	7138	2243	992	4	2337	3	19.6133	gfp-hi	gfp-hi	3028	1661	Infected	Batch1	AM_1
CAACAGTTCTACACTT_1	inf_1	13125	3028	344	4	1043	3	3.30667	gfp-hi	gfp-hi	2604	1224	Infected	Batch1	AM_1
CAACCAATCCTGGGAC_1	inf_1	1395	691	203	4	535	3	33.19	gfp-hi	gfp-hi	2029	704	Infected	Batch1	IM_1
CAACGGCCAGGTGACA_1	inf_1	2976	1111	257	4	934	3	26.4449	gfp-hi	gfp-hi	2696	1111	Infected	Batch1	IM_1
CAACGGCGTTGCCTAA_1	inf_1	11811	2809	190	4	1180	3	4.52121	gfp-hi	gfp-hi	2484	1080	Infected	Batch1	AM_1
CAAGCTATCGAGAAAT_1	inf_1	11811	3021	342	4	1435	3	5.96055	gfp-hi	gfp-hi	2627	1272	Infected	Batch1	IM_3
CAAGGGAGTCAGTCTA_1	inf_1	6105	1831	670	4	1294	3	17.8051	gfp-hi	gfp-hi	2951	1476	Infected	Batch1	IM_3
CAATACGGTGTATTGC_1	inf_1	1653	866	221	4	261	3	15.85	gfp-hi	gfp-hi	2150	865	Infected	Batch1	IM_1
CAATCGAAGGGCAACT_1	inf_1	1664	648	168	4	497	3	34.6755	gfp-hi	gfp-hi	2166	649	Infected	Batch1	IM_1
CAATGACCATGGCGCT_1	inf_1	17245	3483	217	4	1155	3	5.11453	gfp-hi	gfp-hi	2740	1299	Infected	Batch1	AM_1
CAATGACCATTCAGCA_1	inf_1	4221	1271	65	4	99	3	0.142146	gfp-hi	gfp-hi	2806	1226	Infected	Batch1	AM_3
CAATTTCCAAGCAATA_1	inf_1	1607	736	72	4	296	3	19.8507	gfp-hi	gfp-hi	2148	736	Infected	Batch1	IM_1
CACACAAAGGAGCAAA_1	inf_1	2404	1021	86	4	731	3	19.6755	gfp-hi	gfp-hi	2422	1020	Infected	Batch1	IM_1
CACAGATTCGGAAACG_1	inf_1	2041	895	143	4	789	3	10.4851	gfp-hi	gfp-hi	2255	894	Infected	Batch1	IM_2
CACAGGCTCATGGAGG_1	inf_1	2130	903	281	4	1437	3	21.0329	gfp-hi	gfp-hi	2281	901	Infected	Batch1	IM_1
CACAGGCTCTGGGCCA_1	inf_1	2865	1236	400	4	1163	3	24.7469	gfp-hi	gfp-hi	2671	1235	Infected	Batch1	AM_3
CACATGAAGGGCGAGA_1	inf_1	501	321	100	4	401	3	22.5549	gfp-hi	gfp-hi	1865	525	Infected	Batch1	AM_2
CACCAAAGTGCAATGG_1	inf_1	2416	1076	98	4	785	3	12.6656	gfp-hi	gfp-hi	2423	1076	Infected	Batch1	IM_3
CACCGTTTCTCGTTTA_1	inf_1	8335	2208	415	4	1117	3	20.9358	gfp-hi	gfp-hi	2868	1366	Infected	Batch1	IM_3
CACGAATTCTGCCCTA_1	inf_1	565	324	281	4	1561	3	7.25664	gfp-hi	gfp-hi	1758	521	Infected	Batch1	Neutrophils
CACGGGTAGGAACTAT_1	inf_1	1177	668	146	4	1110	3	22.0901	gfp-hi	gfp-hi	2028	713	Infected	Batch1	AM_2
CACGTGGTCGCCATAA_1	inf_1	2690	1083	101	4	766	3	10.0743	gfp-hi	gfp-hi	2589	1083	Infected	Batch1	IM_3
CACGTTCCAAGTGGTG_1	inf_1	1222	546	208	4	840	3	20.2946	gfp-hi	gfp-hi	2204	562	Infected	Batch1	AM_3
CACTAAGTCCCAACTC_1	inf_1	9777	2877	286	4	1594	3	6.99601	gfp-hi	gfp-hi	2718	1458	Infected	Batch1	AM_1
CACTGAATCCAGCCTT_1	inf_1	3503	1235	346	4	1157	3	26.6629	gfp-hi	gfp-hi	2793	1232	Infected	Batch1	AM_1
CACTGGGTCGCGTCGA_1	inf_1	5943	1832	122	4	691	3	7.62241	gfp-hi	gfp-hi	2985	1526	Infected	Batch1	AM_1
CACTGTCGTCTTAGTG_1	inf_1	805	402	264	4	766	3	1.11801	gfp-hi	gfp-hi	1900	523	Infected	Batch1	Neutrophils
CACTTCGGTATTTCCT_1	inf_1	3009	1332	82	4	270	3	4.75241	gfp-hi	gfp-hi	2735	1332	Infected	Batch1	Monocytes
CAGATACCAGAAATCA_1	inf_1	11778	2865	0	0	1712	3	12.9733	gfp-hi	gfp-hi	2571	1162	Infected	Batch1	IM_3
CAGATCAAGAGGTGCT_1	inf_1	621	333	412	4	387	3	2.25443	gfp-hi	gfp-hi	1840	501	Infected	Batch1	Neutrophils
CAGATCAAGCACTAAA_1	inf_1	665	438	359	4	370	3	1.35338	gfp-hi	gfp-hi	1873	573	Infected	Batch1	Neutrophils
CAGATCACACAAATCC_1	inf_1	4773	1605	107	4	926	3	7.85669	gfp-hi	gfp-hi	2953	1484	Infected	Batch1	IM_3
CAGATCATCATGCCCT_1	inf_1	1237	594	165	4	845	3	17.6233	gfp-hi	gfp-hi	1994	654	Infected	Batch1	IM_1
CAGATCATCGAAGAAT_1	inf_1	6704	1704	475	4	1334	3	12.2166	gfp-hi	gfp-hi	2876	1287	Infected	Batch1	AM_1
CAGATTGAGTATCTGC_1	inf_1	2511	1215	179	4	1174	3	14.5759	gfp-hi	gfp-hi	2501	1214	Infected	Batch1	AM_1
CAGCAGCGTAGATCCT_1	inf_1	2776	1208	265	4	995	3	7.13256	gfp-hi	gfp-hi	2635	1208	Infected	Batch1	IM_2
CAGCAGCTCTCTAAGG_1	inf_1	1385	664	87	4	665	3	17.1119	gfp-hi	gfp-hi	2081	666	Infected	Batch1	IM_1
CAGCCAGAGTGAGTGC_1	inf_1	708	455	98	4	327	3	12.5706	gfp-hi	gfp-hi	1898	579	Infected	Batch1	Monocytes
CAGCGTGGTAACACCT_1	inf_1	1441	737	418	4	404	3	17.696	gfp-hi	gfp-hi	2102	737	Infected	Batch1	Neutrophils
CAGGCCAAGAAACACT_1	inf_1	5707	1764	140	4	717	3	9.37445	gfp-hi	gfp-hi	3080	1515	Infected	Batch1	IM_2
CAGGCCAGTTCCCAAA_1	inf_1	6629	1682	713	4	1230	3	14.8288	gfp-hi	gfp-hi	2966	1243	Infected	Batch1	IM_3
CAGGTATTCCAAGCTA_1	inf_1	625	312	191	4	247	3	2.08	gfp-hi	gfp-hi	1867	483	Infected	Batch1	Neutrophils
CATAAGCTCTCCGAGG_1	inf_1	5932	1933	126	4	496	3	17.4309	gfp-hi	gfp-hi	3035	1624	Infected	Batch1	IM_3
CATACAGGTAACCCGC_1	inf_1	13564	3131	175	4	1232	3	5.3008	gfp-hi	gfp-hi	2610	1240	Infected	Batch1	AM_1
CATACAGGTCGAACGA_1	inf_1	599	410	84	4	132	3	0.66778	gfp-hi	gfp-hi	1856	552	Infected	Batch1	AM_3
CATACTTCACTGCTTC_1	inf_1	1529	806	105	4	544	3	7.52126	gfp-hi	gfp-hi	2095	806	Infected	Batch1	IM_2
CATACTTGTGAATGTA_1	inf_1	728	380	329	4	1305	3	2.47253	gfp-hi	gfp-hi	1900	519	Infected	Batch1	Neutrophils
CATAGACCAGGTTACT_1	inf_1	875	356	214	4	285	3	1.25714	gfp-hi	gfp-hi	2004	478	Infected	Batch1	Neutrophils
CATCCCATCATGTCTT_1	inf_1	1037	468	102	3	125	3	28.7367	gfp-hi	gfp-hi	2188	524	Infected	Batch1	IM_1
CATCCGTTCTCGACGG_1	inf_1	5103	1790	397	4	904	3	9.40623	gfp-hi	gfp-hi	3011	1634	Infected	Batch1	IM_3
CATCGTCAGCCTCCAG_1	inf_1	594	257	390	4	482	3	2.86195	gfp-hi	gfp-hi	1883	449	Infected	Batch1	Neutrophils
CATCGTCGTGCTTCAA_1	inf_1	4641	1589	221	4	648	3	8.64038	gfp-hi	gfp-hi	2932	1481	Infected	Batch1	IM_3
CATCGTCGTTATCCAG_1	inf_1	989	601	74	4	256	3	7.07786	gfp-hi	gfp-hi	2091	651	Infected	Batch1	Monocytes
CATGCCTAGTTCCAGT_1	inf_1	4831	1675	463	4	1414	3	9.91513	gfp-hi	gfp-hi	3010	1540	Infected	Batch1	IM_2
CATGCCTGTTGTGGAG_1	inf_1	1839	842	125	4	503	3	8.80914	gfp-hi	gfp-hi	2202	842	Infected	Batch1	Monocytes
CATGCTCAGATCGCTT_1	inf_1	12913	3195	192	4	1047	3	5.96298	gfp-hi	gfp-hi	2654	1303	Infected	Batch1	AM_1
CATTCATGTGGTGATG_1	inf_1	622	332	219	4	293	3	0.803859	gfp-hi	gfp-hi	1800	502	Infected	Batch1	Neutrophils
CATTGAGTCCTACTGC_1	inf_1	628	431	102	4	464	3	14.9682	gfp-hi	gfp-hi	1856	581	Infected	Batch1	Monocytes
CCAATGAAGGAAAGAC_1	inf_1	6844	2128	369	4	1473	3	12.0836	gfp-hi	gfp-hi	2980	1578	Infected	Batch1	IM_3
CCAATGATCTCACTCG_1	inf_1	630	446	129	4	903	3	13.0159	gfp-hi	gfp-hi	1849	602	Infected	Batch1	AM_2
CCACAAACAACGGGTA_1	inf_1	3644	1408	511	4	1255	3	6.80571	gfp-hi	gfp-hi	2816	1403	Infected	Batch1	AM_3
CCACACTAGGACAACC_1	inf_1	6141	1988	1216	4	1501	3	17.9612	gfp-hi	gfp-hi	3049	1662	Infected	Batch1	AM_1
CCACCATAGAGTCTGG_1	inf_1	1350	781	102	4	487	3	15.9259	gfp-hi	gfp-hi	2028	785	Infected	Batch1	IM_1
CCACGAGTCGCCGTGA_1	inf_1	5337	1409	173	4	955	3	14.6712	gfp-hi	gfp-hi	2855	1222	Infected	Batch1	IM_3
CCATAAGAGGAAAGGT_1	inf_1	1593	705	98	4	1002	3	24.796	gfp-hi	gfp-hi	2190	704	Infected	Batch1	AM_3
CCATCACTCAATCCAG_1	inf_1	7168	2293	294	4	1323	3	7.71484	gfp-hi	gfp-hi	3044	1717	Infected	Batch1	AM_1
CCCATTGAGTTTGAGA_1	inf_1	10141	2380	383	4	1064	3	7.91835	gfp-hi	gfp-hi	2560	1082	Infected	Batch1	AM_1
CCCGAAGTCTAGCATG_1	inf_1	3584	1396	124	4	861	3	9.76562	gfp-hi	gfp-hi	2838	1385	Infected	Batch1	IM_3
CCCTAACAGAATCCCT_1	inf_1	12263	2767	444	4	1353	3	4.25671	gfp-hi	gfp-hi	2641	1097	Infected	Batch1	IM_3
CCCTAACAGGGATCTG_1	inf_1	1287	646	428	4	669	3	1.3986	gfp-hi	gfp-hi	2032	680	Infected	Batch1	Neutrophils
CCCTCAAAGTTAGTAG_1	inf_1	1037	448	328	4	645	3	35.1013	gfp-hi	gfp-hi	2189	512	Infected	Batch1	AM_4
CCCTCAATCATCGCTC_1	inf_1	8581	2315	176	4	701	3	4.85957	gfp-hi	gfp-hi	2831	1391	Infected	Batch1	IM_3
CCCTGATAGCTCAGAG_1	inf_1	1147	465	562	4	484	3	0.87184	gfp-hi	gfp-hi	2048	525	Infected	Batch1	Neutrophils
CCCTGATCAGTCGCAC_1	inf_1	3813	832	84	4	482	3	6.2418	gfp-hi	gfp-hi	3002	789	Infected	Batch1	Macrophages/B-cells
CCCTGATGTTACGGAG_1	inf_1	3911	1644	679	4	1474	3	9.48606	gfp-hi	gfp-hi	2922	1616	Infected	Batch1	AM_1
CCGAACGCAGATAAAC_1	inf_1	1477	780	121	4	515	3	24.0352	gfp-hi	gfp-hi	2032	786	Infected	Batch1	IM_1
CCGAACGGTGCGACAA_1	inf_1	7842	2242	93	4	773	3	2.7799	gfp-hi	gfp-hi	2975	1514	Infected	Batch1	IM_3
CCGATCTAGCCGTTAT_1	inf_1	934	412	596	4	313	3	2.14133	gfp-hi	gfp-hi	2020	512	Infected	Batch1	Neutrophils
CCGATGGGTAGACAGC_1	inf_1	2255	906	200	4	657	3	30.5543	gfp-hi	gfp-hi	2355	905	Infected	Batch1	IM_2
CCGCAAGTCTATCGCC_1	inf_1	1946	241	93	4	79	3	1.07914	gfp-hi	gfp-hi	2192	238	Infected	Batch1	Macrophages/B-cells
CCGGTAGGTGTCATGT_1	inf_1	897	544	88	4	231	3	8.02676	gfp-hi	gfp-hi	2055	599	Infected	Batch1	Monocytes
CCGTGAGTCGCTTTAT_1	inf_1	5022	1565	82	4	238	3	10.5536	gfp-hi	gfp-hi	2944	1431	Infected	Batch1	IM_3
CCTAAGACAAGCGAGT_1	inf_1	4044	1504	360	4	1150	3	18.7191	gfp-hi	gfp-hi	2908	1465	Infected	Batch1	IM_2
CCTATCGCAACAAGTA_1	inf_1	7136	2080	93	4	434	3	5.8296	gfp-hi	gfp-hi	3039	1522	Infected	Batch1	IM_3
CCTATCGGTCGCACAC_1	inf_1	3071	910	97	4	277	3	0.35819	gfp-hi	gfp-hi	2653	909	Infected	Batch1	IM_3
CCTCATGCAAGACTGG_1	inf_1	800	479	39	4	191	3	11.25	gfp-hi	gfp-hi	2038	574	Infected	Batch1	AM_2
CCTCATGCATGAATAG_1	inf_1	3353	1326	844	4	1380	3	18.5506	gfp-hi	gfp-hi	2784	1326	Infected	Batch1	AM_3
CCTCATGGTACAGCGA_1	inf_1	13463	3036	163	4	1475	3	5.68224	gfp-hi	gfp-hi	2650	1204	Infected	Batch1	Macrophages/T-cells
CCTCCAATCCATAGAC_1	inf_1	5236	1815	672	4	1753	3	36.44	gfp-hi	gfp-hi	2998	1602	Infected	Batch1	AM_1
CCTCTCCTCCTTATAC_1	inf_1	1226	794	82	4	325	3	11.4192	gfp-hi	gfp-hi	1941	816	Infected	Batch1	Monocytes
CCTCTCCTCTGCCCTA_1	inf_1	986	591	537	4	896	3	5.98377	gfp-hi	gfp-hi	2057	668	Infected	Batch1	Neutrophils
CCTGCATCACGTCATA_1	inf_1	9761	2857	646	4	1585	3	14.7628	gfp-hi	gfp-hi	2736	1399	Infected	Batch1	Macrophages/T-cells
CCTGCATCAGTATGAA_1	inf_1	1556	673	166	4	269	3	25.8997	gfp-hi	gfp-hi	2171	673	Infected	Batch1	IM_1
CCTGCATCAGTTAGAA_1	inf_1	1709	755	117	4	517	3	14.3359	gfp-hi	gfp-hi	2175	755	Infected	Batch1	IM_1
CCTTGTGCAGTAGAAT_1	inf_1	16253	3312	286	4	1433	3	4.53455	gfp-hi	gfp-hi	2801	1337	Infected	Batch1	IM_2
CGAAGGATCCTTGGAA_1	inf_1	6407	1923	382	4	1020	3	7.75714	gfp-hi	gfp-hi	3014	1512	Infected	Batch1	IM_3
CGAAGTTGTAGGTAGC_1	inf_1	8006	1995	198	4	1129	3	16.038	gfp-hi	gfp-hi	2857	1274	Infected	Batch1	IM_3
CGACAGCAGCTTGTTG_1	inf_1	1489	816	98	4	532	3	2.14909	gfp-hi	gfp-hi	2065	817	Infected	Batch1	Monocytes
CGACAGCAGGGCTTCC_1	inf_1	3225	1546	56	4	277	3	6.85271	gfp-hi	gfp-hi	2830	1546	Infected	Batch1	Monocytes
CGACAGCGTCGAGCAA_1	inf_1	4884	1815	95	4	790	3	8.98853	gfp-hi	gfp-hi	2988	1665	Infected	Batch1	IM_2
CGAGAAGCAGTAACAA_1	inf_1	1937	965	123	4	602	3	17.8627	gfp-hi	gfp-hi	2180	963	Infected	Batch1	IM_1
CGAGGAACACAAGCAG_1	inf_1	13367	2408	1253	4	1544	3	11.8725	gfp-hi	gfp-hi	2605	902	Infected	Batch1	IM_3
CGAGGCTCACTCTGCT_1	inf_1	1761	999	1637	4	488	3	14.9915	gfp-hi	gfp-hi	2114	999	Infected	Batch1	IM_1
CGAGTTAAGCAGTACG_1	inf_1	4119	1259	1773	4	1466	3	29.8373	gfp-hi	gfp-hi	2808	1205	Infected	Batch1	AM_3
CGATCGGAGAACCGCA_1	inf_1	6183	2027	245	4	1367	3	23.0632	gfp-hi	gfp-hi	3038	1655	Infected	Batch1	IM_3
CGCAGGTGTGTTTGCA_1	inf_1	4175	1207	218	4	1299	3	22.3952	gfp-hi	gfp-hi	2821	1156	Infected	Batch1	IM_3
CGGAACCGTTATCTGG_1	inf_1	1513	836	102	4	375	3	6.67548	gfp-hi	gfp-hi	2074	836	Infected	Batch1	Monocytes
CGGAATTCATCTCCCA_1	inf_1	3903	1510	122	4	587	3	11.8883	gfp-hi	gfp-hi	2894	1480	Infected	Batch1	IM_3
CGGACACGTCCAGCGT_1	inf_1	2676	994	354	4	806	3	13.2287	gfp-hi	gfp-hi	2587	993	Infected	Batch1	IM_1
CGGCAGTCAACGCCCA_1	inf_1	2878	1128	153	4	973	3	25.886	gfp-hi	gfp-hi	2652	1126	Infected	Batch1	AM_1
CGGGACTCAAGCTCTA_1	inf_1	1400	800	93	3	391	3	6.21429	gfp-hi	gfp-hi	2053	800	Infected	Batch1	Monocytes
CGGGTGTGTCTCGGGT_1	inf_1	1444	717	109	4	501	3	18.2133	gfp-hi	gfp-hi	2094	715	Infected	Batch1	IM_4
CGGGTGTTCTGCGATA_1	inf_1	3376	1283	187	4	709	3	17.2097	gfp-hi	gfp-hi	2788	1282	Infected	Batch1	IM_1
CGGTCAGGTTTCCATT_1	inf_1	2459	928	125	4	784	3	27.0435	gfp-hi	gfp-hi	2459	928	Infected	Batch1	IM_1
CGTAATGTCGTTGTAG_1	inf_1	4275	1298	588	4	942	3	16.7485	gfp-hi	gfp-hi	2868	1242	Infected	Batch1	Macrophages/T-cells
CGTCAAACACCTGCGA_1	inf_1	1863	877	179	4	559	3	21.2024	gfp-hi	gfp-hi	2170	872	Infected	Batch1	IM_1
CGTGTCTAGAAGAACG_1	inf_1	3477	1328	69	4	437	3	6.03969	gfp-hi	gfp-hi	2805	1328	Infected	Batch1	IM_2
CGTTAGAAGAGAGAAC_1	inf_1	1471	758	339	4	1466	3	10.1292	gfp-hi	gfp-hi	2030	764	Infected	Batch1	IM_1
CGTTCTGCAACCGCCA_1	inf_1	1006	507	302	4	598	3	35.3877	gfp-hi	gfp-hi	2176	596	Infected	Batch1	AM_2
CGTTGGGTCGTCAAAC_1	inf_1	1918	716	347	4	1064	3	37.5391	gfp-hi	gfp-hi	2259	715	Infected	Batch1	AM_2
CTAACCCCATCAGCGC_1	inf_1	8645	2714	141	4	489	3	4.84673	gfp-hi	gfp-hi	2902	1612	Infected	Batch1	IM_3
CTACCCACACATACGT_1	inf_1	6046	1722	103	4	301	3	6.9302	gfp-hi	gfp-hi	2974	1399	Infected	Batch1	IM_3
CTACTATAGGTAAGGA_1	inf_1	2173	958	652	4	835	3	7.133	gfp-hi	gfp-hi	2308	958	Infected	Batch1	IM_2
CTACTATGTCGGTGAA_1	inf_1	1360	504	86	4	401	3	19.1176	gfp-hi	gfp-hi	2032	516	Infected	Batch1	Macrophages/B-cells
CTACTATGTTCCACAA_1	inf_1	2560	1063	325	4	769	3	10.1172	gfp-hi	gfp-hi	2532	1063	Infected	Batch1	Neutrophils
CTAGACAAGAGGTCAC_1	inf_1	1572	870	96	4	437	3	10.0509	gfp-hi	gfp-hi	2050	870	Infected	Batch1	DC.103+11B-
CTAGGTACAAGCTCTA_1	inf_1	8048	2332	196	4	1172	3	6.25	gfp-hi	gfp-hi	2891	1514	Infected	Batch1	AM_1
CTAGGTACACCATAAC_1	inf_1	5400	2008	164	4	837	3	10.4444	gfp-hi	gfp-hi	3131	1801	Infected	Batch1	IM_2
CTATCCGAGTCACACT_1	inf_1	2163	952	81	4	512	3	29.5423	gfp-hi	gfp-hi	2298	952	Infected	Batch1	IM_1
CTATCCGGTATCGGTT_1	inf_1	1017	570	107	4	401	3	11.0128	gfp-hi	gfp-hi	2099	631	Infected	Batch1	IM_1
CTATCTAAGGCTCAAG_1	inf_1	2733	1119	140	4	418	3	10.4281	gfp-hi	gfp-hi	2615	1117	Infected	Batch1	IM_3
CTATCTAGTACCTATG_1	inf_1	4521	1571	702	4	909	3	21.3227	gfp-hi	gfp-hi	2925	1459	Infected	Batch1	IM_2
CTATCTATCGTCGATA_1	inf_1	6385	1692	104	4	961	3	5.13704	gfp-hi	gfp-hi	2941	1330	Infected	Batch1	IM_3
CTCATGCCAGCGAGTA_1	inf_1	2158	1067	325	4	1179	3	20.3429	gfp-hi	gfp-hi	2279	1067	Infected	Batch1	AM_3
CTCATGCGTCGCCACA_1	inf_1	9543	2394	2002	4	1651	3	28.3768	gfp-hi	gfp-hi	2657	1109	Infected	Batch1	Macrophages/T-cells
CTCCAACTCAAGCTGT_1	inf_1	716	351	460	4	800	3	33.6592	gfp-hi	gfp-hi	2044	501	Infected	Batch1	Neutrophils
CTCCACACAGTTCCAA_1	inf_1	1379	634	70	3	119	3	2.32052	gfp-hi	gfp-hi	2021	638	Infected	Batch1	Neutrophils
CTCCACAGTTGTGGCC_1	inf_1	9074	2691	1227	4	1481	3	10.1168	gfp-hi	gfp-hi	2865	1502	Infected	Batch1	IM_3
CTCCATGTCTGGGCAC_1	inf_1	1645	815	102	4	758	3	30.0912	gfp-hi	gfp-hi	2129	816	Infected	Batch1	IM_1
CTCCCTCAGACTACGG_1	inf_1	3887	1681	145	4	1168	3	4.39928	gfp-hi	gfp-hi	2951	1666	Infected	Batch1	AM_1
CTCCTTTCACTTTAGG_1	inf_1	1552	618	97	4	544	3	28.8015	gfp-hi	gfp-hi	2220	618	Infected	Batch1	IM_4
CTCCTTTTCCACGTAA_1	inf_1	1568	705	109	4	323	3	32.3342	gfp-hi	gfp-hi	2146	705	Infected	Batch1	AM_2
CTCGAGGCAATGCAAA_1	inf_1	3355	1267	109	4	985	3	8.67362	gfp-hi	gfp-hi	2767	1266	Infected	Batch1	IM_3
CTCTCGAGTTAGAGTA_1	inf_1	1278	768	269	4	765	3	17.3709	gfp-hi	gfp-hi	2015	787	Infected	Batch1	IM_1
CTCTCGATCAAGCCCG_1	inf_1	969	425	179	4	1067	3	33.8493	gfp-hi	gfp-hi	2163	513	Infected	Batch1	IM_1
CTCTGGTTCCTTGAAG_1	inf_1	3938	1407	143	4	839	3	6.37379	gfp-hi	gfp-hi	2836	1382	Infected	Batch1	IM_3
CTGAATGCACTACGGC_1	inf_1	860	410	220	4	565	3	29.8837	gfp-hi	gfp-hi	2116	504	Infected	Batch1	AM_2
CTGAGCGAGAAGAACG_1	inf_1	8099	2295	299	4	1113	3	8.26028	gfp-hi	gfp-hi	2898	1504	Infected	Batch1	AM_1
CTGATCCCAGTAGTGG_1	inf_1	1899	1039	119	4	499	3	6.16114	gfp-hi	gfp-hi	2169	1037	Infected	Batch1	Monocytes
CTGCAGGTCGACGCGT_1	inf_1	8406	2293	122	4	859	3	4.1399	gfp-hi	gfp-hi	2885	1431	Infected	Batch1	IM_3
CTGCCATCATCGATGT_1	inf_1	7976	1949	185	4	552	3	7.64794	gfp-hi	gfp-hi	2829	1246	Infected	Batch1	IM_3
CTGCCATGTTTGAAAG_1	inf_1	3497	1280	254	4	1390	3	19.1879	gfp-hi	gfp-hi	2791	1278	Infected	Batch1	AM_1
CTGCCTACAAACGTGG_1	inf_1	3762	1079	166	4	274	3	1.46199	gfp-hi	gfp-hi	2718	1066	Infected	Batch1	AM_3
CTGCCTACAGATTAAG_1	inf_1	4765	1847	770	4	911	3	8.16369	gfp-hi	gfp-hi	3020	1698	Infected	Batch1	Neutrophils
CTGCCTATCTGCAGCG_1	inf_1	898	291	736	4	626	3	15.5902	gfp-hi	gfp-hi	2114	396	Infected	Batch1	Neutrophils
CTGCTCACAGACGCTC_1	inf_1	2050	903	107	4	402	3	8.34146	gfp-hi	gfp-hi	2273	900	Infected	Batch1	IM_2
CTGGACGCAAGCAGGT_1	inf_1	2634	928	38	4	298	3	3.79651	gfp-hi	gfp-hi	2553	927	Infected	Batch1	IM_2
CTGGTCTAGCCTGTCG_1	inf_1	2570	972	133	4	397	3	19.7276	gfp-hi	gfp-hi	2536	971	Infected	Batch1	IM_1
CTGGTCTGTCAACGCC_1	inf_1	10521	3051	452	4	1668	3	11.5198	gfp-hi	gfp-hi	2616	1372	Infected	Batch1	AM_1
CTGTGAAAGCGTTCAT_1	inf_1	1377	645	216	4	1298	3	21.7139	gfp-hi	gfp-hi	2126	646	Infected	Batch1	IM_1
CTGTGGGAGGACCCAA_1	inf_1	5989	1475	342	4	1019	3	15.1277	gfp-hi	gfp-hi	2828	1187	Infected	Batch1	IM_3
CTTACCGAGCAGCGAT_1	inf_1	5045	1793	167	4	1227	3	17.4628	gfp-hi	gfp-hi	2990	1623	Infected	Batch1	AM_1
CTTACCGTCAAAGCCT_1	inf_1	8995	2158	137	4	830	3	8.70484	gfp-hi	gfp-hi	2684	1152	Infected	Batch1	AM_1
CTTAGGAGTTGCATAC_1	inf_1	3645	1410	661	4	1474	3	24.1701	gfp-hi	gfp-hi	2834	1396	Infected	Batch1	AM_1
CTTCCGAAGGGTACAC_1	inf_1	1171	646	15	3	102	3	4.01366	gfp-hi	gfp-hi	2073	659	Infected	Batch1	IM_1
CTTCGGTAGATGCTTC_1	inf_1	4107	1331	202	4	1021	3	10.9569	gfp-hi	gfp-hi	2860	1296	Infected	Batch1	IM_3
CTTCTAAAGGGCTTCC_1	inf_1	928	498	23	3	313	3	22.8448	gfp-hi	gfp-hi	2174	576	Infected	Batch1	AM_2
CTTCTAACAAATGGAT_1	inf_1	9241	2819	157	4	787	3	7.00141	gfp-hi	gfp-hi	2841	1511	Infected	Batch1	AM_1
CTTGATTAGCGAGTAC_1	inf_1	5118	1566	1231	4	1562	3	23.3685	gfp-hi	gfp-hi	2899	1386	Infected	Batch1	AM_1
CTTGATTGTAGAGATT_1	inf_1	552	306	252	4	384	3	1.08696	gfp-hi	gfp-hi	1831	504	Infected	Batch1	Neutrophils
CTTTCAAGTTGCCTAA_1	inf_1	2354	1146	305	4	629	3	3.52591	gfp-hi	gfp-hi	2373	1146	Infected	Batch1	Neutrophils
GAAATGAAGATGAAGG_1	inf_1	1960	706	225	4	1007	3	22.1939	gfp-hi	gfp-hi	2236	706	Infected	Batch1	IM_1
GAAATGAAGTTGGAGC_1	inf_1	14410	3084	561	4	1460	3	10.6593	gfp-hi	gfp-hi	2563	1137	Infected	Batch1	AM_1
GAAATGATCTCCTGTG_1	inf_1	1547	712	162	4	864	3	30.446	gfp-hi	gfp-hi	2120	713	Infected	Batch1	IM_1
GAACACTGTACAGGTG_1	inf_1	2540	1002	119	4	646	3	23.2283	gfp-hi	gfp-hi	2517	1001	Infected	Batch1	IM_1
GAACTGTAGACCAGAC_1	inf_1	2366	928	522	4	1299	3	24.6407	gfp-hi	gfp-hi	2402	928	Infected	Batch1	AM_2
GAACTGTGTTTGTGGT_1	inf_1	711	434	126	4	217	3	24.0506	gfp-hi	gfp-hi	1981	577	Infected	Batch1	Monocytes
GAAGCCCTCCACATAG_1	inf_1	2153	1039	94	4	205	3	5.57362	gfp-hi	gfp-hi	2286	1038	Infected	Batch1	Monocytes
GAAGCCCTCGAGCCAC_1	inf_1	1900	897	125	4	862	3	22.7368	gfp-hi	gfp-hi	2198	897	Infected	Batch1	IM_4
GAAGGACGTGTACATC_1	inf_1	4321	1295	141	4	493	3	4.92941	gfp-hi	gfp-hi	2849	1237	Infected	Batch1	IM_3
GAAGGGTAGTACAACA_1	inf_1	8411	2562	824	4	1319	3	8.798	gfp-hi	gfp-hi	2968	1631	Infected	Batch1	AM_4
GAAGGGTGTGGCTGAA_1	inf_1	3624	1223	526	4	1174	3	5.40839	gfp-hi	gfp-hi	2804	1218	Infected	Batch1	Neutrophils
GAAGTAAGTGCCGGTT_1	inf_1	628	465	114	4	338	3	8.59873	gfp-hi	gfp-hi	1720	659	Infected	Batch1	IM_1
GAAGTAATCGATTCCC_1	inf_1	9161	2618	94	4	343	3	8.00131	gfp-hi	gfp-hi	2788	1354	Infected	Batch1	IM_3
GAATCGTCATTGTACG_1	inf_1	7500	2254	85	4	492	3	6.78667	gfp-hi	gfp-hi	3009	1591	Infected	Batch1	IM_3
GACACGCAGTAAACAC_1	inf_1	1105	594	391	4	521	3	0.542986	gfp-hi	gfp-hi	2060	646	Infected	Batch1	Neutrophils
GACCAATAGAGCACTG_1	inf_1	1289	555	17	4	185	3	7.91311	gfp-hi	gfp-hi	2162	559	Infected	Batch1	IM_4
GACCAATCAGTCGCAC_1	inf_1	2769	1158	129	4	1159	3	11.5926	gfp-hi	gfp-hi	2634	1157	Infected	Batch1	IM_1
GACCCAGAGTTGGGAC_1	inf_1	600	373	69	4	312	3	11.1667	gfp-hi	gfp-hi	1922	521	Infected	Batch1	AM_2
GACCCAGCATTAGGAA_1	inf_1	2866	1102	98	4	942	3	18.3182	gfp-hi	gfp-hi	2650	1102	Infected	Batch1	IM_4
GACCTTCGTGGAATGC_1	inf_1	3928	1248	1420	4	1945	3	26.3747	gfp-hi	gfp-hi	2785	1219	Infected	Batch1	AM_3
GACGTTACACAGCCAC_1	inf_1	6410	1744	1040	4	1106	3	21.7941	gfp-hi	gfp-hi	2889	1348	Infected	Batch1	AM_1
GACGTTAGTCACGACC_1	inf_1	1002	451	88	4	229	3	1.99601	gfp-hi	gfp-hi	2133	483	Infected	Batch1	IM_4
GACTCAAGTCACCTTC_1	inf_1	2030	915	87	4	435	3	12.6601	gfp-hi	gfp-hi	2242	913	Infected	Batch1	IM_1
GACTCTCTCTTTACAC_1	inf_1	7283	2163	106	4	444	3	4.33887	gfp-hi	gfp-hi	3070	1549	Infected	Batch1	IM_2
GACTTCCTCCGTATGA_1	inf_1	5695	2196	247	4	1317	3	8.49868	gfp-hi	gfp-hi	3173	1926	Infected	Batch1	AM_1
GAGAAATCATGGACAG_1	inf_1	1321	803	87	4	285	3	1.81681	gfp-hi	gfp-hi	1989	809	Infected	Batch1	Monocytes
GAGACCCGTATATGGA_1	inf_1	784	443	340	4	341	3	2.93367	gfp-hi	gfp-hi	2027	533	Infected	Batch1	Neutrophils
GAGACTTCACGGGTAA_1	inf_1	5281	1806	998	4	1438	3	33.1945	gfp-hi	gfp-hi	2997	1591	Infected	Batch1	AM_1
GAGACTTCATGAATCC_1	inf_1	6696	2219	572	4	1503	3	20.2957	gfp-hi	gfp-hi	3132	1749	Infected	Batch1	AM_1
GAGACTTGTTTGAACC_1	inf_1	2053	594	1573	4	1206	3	39.5519	gfp-hi	gfp-hi	2309	593	Infected	Batch1	Neutrophils
GAGCTGCAGGAGTCTG_1	inf_1	7326	2113	175	4	1150	3	7.13896	gfp-hi	gfp-hi	2914	1485	Infected	Batch1	AM_1
GAGCTGCAGGCTTCCG_1	inf_1	3003	1339	118	4	588	3	16.2171	gfp-hi	gfp-hi	2726	1338	Infected	Batch1	IM_1
GAGCTGCCAGCAGTGA_1	inf_1	1195	660	158	4	697	3	20.3347	gfp-hi	gfp-hi	2006	710	Infected	Batch1	IM_1
GAGGGATGTGGTCTTA_1	inf_1	3455	1290	171	4	880	3	8.50941	gfp-hi	gfp-hi	2780	1289	Infected	Batch1	AM_3
GAGTGAGTCGCTCCTA_1	inf_1	1165	676	98	4	417	3	3.00429	gfp-hi	gfp-hi	2046	685	Infected	Batch1	Monocytes
GAGTGTTCAAGCAATA_1	inf_1	2747	1177	66	3	308	3	4.14998	gfp-hi	gfp-hi	2620	1170	Infected	Batch1	DC
GAGTGTTCACATCCCT_1	inf_1	4846	1698	1411	4	1684	3	6.99546	gfp-hi	gfp-hi	2947	1581	Infected	Batch1	AM_3
GAGTGTTCACTTGGCG_1	inf_1	4336	1669	92	4	423	3	2.81365	gfp-hi	gfp-hi	2963	1601	Infected	Batch1	IM_3
GAGTTTGAGTCTCGTA_1	inf_1	1489	680	395	4	958	3	15.7824	gfp-hi	gfp-hi	2194	680	Infected	Batch1	AM_3
GAGTTTGGTGTTGAGG_1	inf_1	676	409	88	4	94	3	5.47337	gfp-hi	gfp-hi	1951	516	Infected	Batch1	IM_4
GATAGCTTCTTCCACG_1	inf_1	3817	1759	95	4	656	3	6.89023	gfp-hi	gfp-hi	2996	1748	Infected	Batch1	Monocytes
GATCACAGTTGTATGC_1	inf_1	14620	3043	135	4	827	3	4.19289	gfp-hi	gfp-hi	2566	1118	Infected	Batch1	AM_1
GATCATGGTATGTCTG_1	inf_1	2105	1125	327	4	509	3	13.7767	gfp-hi	gfp-hi	2245	1123	Infected	Batch1	Monocytes
GATGACTGTACCGTCG_1	inf_1	5194	1628	1323	4	1906	3	21.6789	gfp-hi	gfp-hi	2925	1453	Infected	Batch1	AM_3
GATGGAGGTACGGTTT_1	inf_1	1541	701	124	4	850	3	35.6911	gfp-hi	gfp-hi	2152	700	Infected	Batch1	IM_1
GATTGGTAGTCGAGGT_1	inf_1	1408	864	73	4	452	3	6.53409	gfp-hi	gfp-hi	1998	864	Infected	Batch1	Monocytes
GCAGCCAGTCGAGTGA_1	inf_1	1819	906	2054	4	439	3	5.88235	gfp-hi	gfp-hi	2167	906	Infected	Batch1	Monocytes
GCAGCCAGTGTGGACA_1	inf_1	1637	758	556	4	882	3	15.9438	gfp-hi	gfp-hi	2139	759	Infected	Batch1	IM_1
GCAGGCTCAGGATTCT_1	inf_1	5992	1899	102	4	536	3	4.2223	gfp-hi	gfp-hi	3122	1582	Infected	Batch1	DC.103+11B-
GCAGTTACATGGAATA_1	inf_1	4184	1334	252	4	1213	3	14.4837	gfp-hi	gfp-hi	2849	1288	Infected	Batch1	IM_2
GCATCTCCACATAACC_1	inf_1	668	428	551	4	549	3	3.29341	gfp-hi	gfp-hi	1789	579	Infected	Batch1	Neutrophils
GCATGATCACTTCAAG_1	inf_1	5021	1601	119	4	561	3	5.3575	gfp-hi	gfp-hi	2957	1449	Infected	Batch1	IM_3
GCCAGCAGTGTTCCAA_1	inf_1	3058	1229	312	4	890	3	9.12361	gfp-hi	gfp-hi	2705	1229	Infected	Batch1	IM_2
GCCAGGTCAGTTCACA_1	inf_1	3846	1670	155	4	1301	3	8.06032	gfp-hi	gfp-hi	2956	1652	Infected	Batch1	AM_1
GCCAGTGCAAAGGAGA_1	inf_1	6953	1474	1447	4	1521	3	25.2697	gfp-hi	gfp-hi	2838	1021	Infected	Batch1	IM_3
GCCAGTGCAGCTTTGA_1	inf_1	2571	832	192	4	1051	3	36.2116	gfp-hi	gfp-hi	2520	832	Infected	Batch1	AM_2
GCCATTCGTTAAGAAC_1	inf_1	5430	1713	157	4	743	3	7.3849	gfp-hi	gfp-hi	2962	1515	Infected	Batch1	IM_3
GCCATTCTCGCTTAAG_1	inf_1	6039	1928	263	4	1140	3	10.366	gfp-hi	gfp-hi	3009	1587	Infected	Batch1	AM_1
GCCCAGACACCAAATC_1	inf_1	744	517	475	4	402	3	1.47849	gfp-hi	gfp-hi	1869	642	Infected	Batch1	Neutrophils
GCCCAGAGTGGCGCTT_1	inf_1	928	467	233	4	276	3	24.7845	gfp-hi	gfp-hi	2083	590	Infected	Batch1	IM_1
GCCCAGAGTTAATCGC_1	inf_1	708	464	14	2	70	3	3.24859	gfp-hi	gfp-hi	1890	568	Infected	Batch1	AM_2
GCCCGAAAGGCTCTCG_1	inf_1	4491	1801	146	4	358	3	12.4471	gfp-hi	gfp-hi	3026	1723	Infected	Batch1	IM_3
GCCGATGAGGTAGACC_1	inf_1	3045	1402	284	4	838	3	14.3186	gfp-hi	gfp-hi	2746	1399	Infected	Batch1	AM_4
GCCTGTTCAGAGGTAC_1	inf_1	2454	1311	83	4	170	3	4.60473	gfp-hi	gfp-hi	2448	1306	Infected	Batch1	DC.103+11B-
GCGAGAAAGAGAGTTT_1	inf_1	6297	1892	116	4	634	3	6.55868	gfp-hi	gfp-hi	3016	1535	Infected	Batch1	IM_3
GCGATCGCATCTGGGC_1	inf_1	2400	1013	104	4	709	3	6.79167	gfp-hi	gfp-hi	2412	1013	Infected	Batch1	IM_1
GCGATCGGTGTAGGAC_1	inf_1	3669	1405	620	4	1383	3	18.0158	gfp-hi	gfp-hi	2832	1400	Infected	Batch1	AM_3
GCGGATCAGCAAATCA_1	inf_1	8384	2304	293	4	1171	3	8.2896	gfp-hi	gfp-hi	2822	1401	Infected	Batch1	AM_1
GCGTTTCTCCAACACA_1	inf_1	3371	1320	131	4	677	3	3.26313	gfp-hi	gfp-hi	2786	1318	Infected	Batch1	IM_1
GCGTTTCTCTCTGGTC_1	inf_1	2999	1229	154	4	926	3	26.909	gfp-hi	gfp-hi	2713	1226	Infected	Batch1	IM_1
GCTACAACATGCACTA_1	inf_1	1145	507	351	4	533	3	0.786026	gfp-hi	gfp-hi	2055	561	Infected	Batch1	Neutrophils
GCTACAAGTCCATACA_1	inf_1	3231	1194	82	4	316	3	20.3033	gfp-hi	gfp-hi	2747	1193	Infected	Batch1	IM_1
GCTACCTCAACCGTGC_1	inf_1	3498	1338	38	4	419	3	3.40194	gfp-hi	gfp-hi	2804	1337	Infected	Batch1	IM_2
GCTGCAGGTGGGTATG_1	inf_1	10502	2349	1322	4	1530	3	13.007	gfp-hi	gfp-hi	2607	993	Infected	Batch1	Neutrophils
GCTTCACCAAAGGTTA_1	inf_1	801	320	455	4	454	3	33.9576	gfp-hi	gfp-hi	2110	456	Infected	Batch1	Neutrophils
GCTTTCGTCTTGGAAC_1	inf_1	7130	218	707	4	1464	3	19.8878	gfp-hi	gfp-hi	3681	116	Infected	Batch1	Macrophages/B-cells
GGAAGTGAGGCCACTC_1	inf_1	4749	1403	198	4	942	3	11.434	gfp-hi	gfp-hi	2903	1291	Infected	Batch1	IM_2
GGAATGGCAGTACTAC_1	inf_1	2603	1195	97	4	497	3	14.9059	gfp-hi	gfp-hi	2559	1195	Infected	Batch1	IM_3
GGACGTCCACTATCGA_1	inf_1	5515	1905	145	4	615	3	10.1904	gfp-hi	gfp-hi	3079	1653	Infected	Batch1	AM_1
GGAGAACAGAAGCCTG_1	inf_1	2008	814	907	4	1046	3	2.04183	gfp-hi	gfp-hi	2268	811	Infected	Batch1	Neutrophils
GGAGAACTCGTCTAAG_1	inf_1	7122	1895	657	4	1549	3	8.39652	gfp-hi	gfp-hi	2917	1345	Infected	Batch1	IM_3
GGAGATGCAACGATCT_1	inf_1	10079	2416	169	4	871	3	4.9112	gfp-hi	gfp-hi	2761	1151	Infected	Batch1	IM_3
GGAGCAAAGTTAGAAC_1	inf_1	1685	827	894	4	1136	3	21.6024	gfp-hi	gfp-hi	2177	826	Infected	Batch1	AM_2
GGAGCAATCTCTGCTG_1	inf_1	1283	642	84	4	405	3	31.4108	gfp-hi	gfp-hi	2083	657	Infected	Batch1	AM_2
GGATCTAAGCGTTACT_1	inf_1	3579	1458	96	4	262	3	11.6792	gfp-hi	gfp-hi	2882	1458	Infected	Batch1	IM_2
GGATGTTGTTCGCGTG_1	inf_1	800	416	390	4	179	3	1.625	gfp-hi	gfp-hi	1945	535	Infected	Batch1	Neutrophils
GGCTGTGCAATACCTG_1	inf_1	9393	2149	959	4	1512	3	19.7381	gfp-hi	gfp-hi	2659	1043	Infected	Batch1	IM_3
GGCTGTGCAGCTTCCT_1	inf_1	2335	1219	534	4	459	3	3.76874	gfp-hi	gfp-hi	2358	1219	Infected	Batch1	Monocytes
GGCTTGGAGTTGCGAG_1	inf_1	1662	904	104	3	222	3	4.09146	gfp-hi	gfp-hi	2097	904	Infected	Batch1	Monocytes
GGCTTTCCAATAGGAT_1	inf_1	1137	593	20	3	176	3	2.90237	gfp-hi	gfp-hi	2145	620	Infected	Batch1	IM_4
GGCTTTCCATGAATCC_1	inf_1	9102	2605	350	4	1533	3	10.3604	gfp-hi	gfp-hi	2831	1426	Infected	Batch1	IM_3
GGGACAAAGAAATCCA_1	inf_1	6186	2070	274	4	1018	3	7.96961	gfp-hi	gfp-hi	3090	1717	Infected	Batch1	AM_1
GGGACAACAGAGGTAC_1	inf_1	2146	967	117	4	721	3	15.2842	gfp-hi	gfp-hi	2293	967	Infected	Batch1	IM_3
GGGACAAGTCGAGCAA_1	inf_1	1832	914	141	4	421	3	15.5022	gfp-hi	gfp-hi	2143	914	Infected	Batch1	IM_1
GGGACAAGTGTCGCTG_1	inf_1	1568	657	260	4	712	3	32.398	gfp-hi	gfp-hi	2164	655	Infected	Batch1	IM_1
GGGACCTTCGGAGTGA_1	inf_1	5442	1630	108	4	429	3	5.53105	gfp-hi	gfp-hi	3002	1424	Infected	Batch1	IM_3
GGGACTCAGTGGTCAG_1	inf_1	621	427	83	4	250	3	11.4332	gfp-hi	gfp-hi	1819	594	Infected	Batch1	Monocytes
GGGAGTAAGGATACCG_1	inf_1	4107	1339	711	4	981	3	18.4319	gfp-hi	gfp-hi	2831	1295	Infected	Batch1	IM_3
GGGATGAAGGACGCTA_1	inf_1	868	453	307	4	354	3	33.9862	gfp-hi	gfp-hi	2127	557	Infected	Batch1	IM_1
GGGCTACCAGTAGTTC_1	inf_1	3646	1262	117	4	514	3	6.74712	gfp-hi	gfp-hi	2805	1255	Infected	Batch1	IM_3
GGGCTCACACCGAATT_1	inf_1	587	378	270	4	415	3	2.89608	gfp-hi	gfp-hi	1740	544	Infected	Batch1	Neutrophils
GGGCTCATCAGTGTTG_1	inf_1	10391	2425	197	4	661	3	6.44789	gfp-hi	gfp-hi	2574	1098	Infected	Batch1	AM_1
GGGTAGAGTACAGAGC_1	inf_1	2196	773	479	4	983	3	19.2623	gfp-hi	gfp-hi	2335	773	Infected	Batch1	Neutrophils
GGGTCACCACCGTGCA_1	inf_1	9219	2276	297	4	1221	3	4.66428	gfp-hi	gfp-hi	2706	1166	Infected	Batch1	AM_1
GGGTCACTCTTTCAGT_1	inf_1	6218	1955	407	4	1280	3	11.3702	gfp-hi	gfp-hi	3004	1605	Infected	Batch1	AM_1
GGGTTATGTCTAGTGT_1	inf_1	2796	993	93	4	303	3	22.3891	gfp-hi	gfp-hi	2612	993	Infected	Batch1	IM_2
GGGTTTAGTAGTGTGG_1	inf_1	949	578	72	4	375	3	7.90306	gfp-hi	gfp-hi	2081	630	Infected	Batch1	Monocytes
GGGTTTAGTTCGGTCG_1	inf_1	1172	743	52	3	261	3	5.03413	gfp-hi	gfp-hi	2014	757	Infected	Batch1	Monocytes
GGTAATCGTTGTAGCT_1	inf_1	3809	1367	112	4	311	3	18.7451	gfp-hi	gfp-hi	2856	1348	Infected	Batch1	IM_3
GGTAGAGAGCGCGTTC_1	inf_1	8091	2364	425	4	1141	3	10.7033	gfp-hi	gfp-hi	2917	1519	Infected	Batch1	AM_1
GGTCACGTCTTACCGC_1	inf_1	3520	1240	419	4	814	3	29.6591	gfp-hi	gfp-hi	2789	1238	Infected	Batch1	AM_3
GGTGTCGGTATCGCTA_1	inf_1	6746	1974	127	4	444	3	13.1634	gfp-hi	gfp-hi	3004	1497	Infected	Batch1	IM_3
GGTGTTAAGAGGTCAC_1	inf_1	3259	1126	1007	4	1199	3	37.5268	gfp-hi	gfp-hi	2735	1126	Infected	Batch1	Neutrophils
GGTGTTAAGCGTCAGA_1	inf_1	1451	860	70	4	308	3	3.58374	gfp-hi	gfp-hi	2024	859	Infected	Batch1	Monocytes
GTAACACGTTGTGTTG_1	inf_1	1556	678	291	4	1386	3	26.6067	gfp-hi	gfp-hi	2196	678	Infected	Batch1	AM_3
GTAACACTCGACCATA_1	inf_1	573	295	61	4	1105	3	3.66492	gfp-hi	gfp-hi	1927	429	Infected	Batch1	AM_2
GTAACCAAGGCAGGTT_1	inf_1	7251	2560	173	4	1147	3	6.37153	gfp-hi	gfp-hi	3164	1925	Infected	Batch1	AM_1
GTAAGTCAGGACTAAT_1	inf_1	1456	713	122	4	582	3	20.3297	gfp-hi	gfp-hi	2098	713	Infected	Batch1	IM_1
GTAAGTCTCCCGAACG_1	inf_1	2926	993	95	4	307	3	0.341763	gfp-hi	gfp-hi	2638	993	Infected	Batch1	AM_1
GTAATCGGTTCGGACC_1	inf_1	2295	1146	76	4	440	3	4.88017	gfp-hi	gfp-hi	2349	1145	Infected	Batch1	Monocytes
GTAATGCCAGCGTTTA_1	inf_1	2173	880	180	4	612	3	13.9439	gfp-hi	gfp-hi	2295	880	Infected	Batch1	IM_1
GTAGCTAGTGACTAAA_1	inf_1	7905	1984	127	4	1229	3	5.55345	gfp-hi	gfp-hi	2842	1280	Infected	Batch1	IM_3
GTAGGAGGTCGATTAC_1	inf_1	1514	608	677	4	785	3	2.77411	gfp-hi	gfp-hi	2077	611	Infected	Batch1	Neutrophils
GTAGGTTAGAAATTGC_1	inf_1	1306	761	87	4	221	3	9.80092	gfp-hi	gfp-hi	2027	768	Infected	Batch1	Monocytes
GTAGGTTGTAAGATTG_1	inf_1	1731	973	116	4	347	3	9.41652	gfp-hi	gfp-hi	2102	973	Infected	Batch1	IM_1
GTAGTACTCGGATTAC_1	inf_1	1447	698	116	4	644	3	22.8058	gfp-hi	gfp-hi	2126	700	Infected	Batch1	IM_1
GTATTGGAGGTCATTC_1	inf_1	5635	1946	488	4	1193	3	7.50665	gfp-hi	gfp-hi	3062	1685	Infected	Batch1	IM_3
GTCACGGCAGAACATA_1	inf_1	4687	1433	94	4	625	3	4.30979	gfp-hi	gfp-hi	2930	1327	Infected	Batch1	IM_3
GTCACTCCACACGGTC_1	inf_1	6654	2028	209	4	1123	3	7.61948	gfp-hi	gfp-hi	3058	1575	Infected	Batch1	IM_3
GTCACTCGTTTGGGAG_1	inf_1	2089	679	115	4	990	3	13.6429	gfp-hi	gfp-hi	2330	679	Infected	Batch1	IM_4
GTCAGCGCAACGACAG_1	inf_1	1963	1085	117	4	617	3	8.30362	gfp-hi	gfp-hi	2176	1084	Infected	Batch1	IM_1
GTCAGCGGTATGTGTC_1	inf_1	1333	776	99	4	252	3	12.3031	gfp-hi	gfp-hi	2029	780	Infected	Batch1	Monocytes
GTCATCCTCCCTAGGG_1	inf_1	12422	3252	451	4	1441	3	10.2077	gfp-hi	gfp-hi	2621	1339	Infected	Batch1	AM_1
GTCATTTCAAAGCTAA_1	inf_1	1650	866	89	4	469	3	20.2424	gfp-hi	gfp-hi	2133	866	Infected	Batch1	IM_1
GTCCCATCACCCAACG_1	inf_1	14240	2978	168	4	787	3	4.23455	gfp-hi	gfp-hi	2576	1090	Infected	Batch1	IM_3
GTCCCATTCAAAGGAT_1	inf_1	3251	1208	185	4	848	3	13.0114	gfp-hi	gfp-hi	2753	1208	Infected	Batch1	IM_2
GTCCTCAAGGGCAGGA_1	inf_1	10682	2363	903	4	1561	3	10.9436	gfp-hi	gfp-hi	2642	1104	Infected	Batch1	AM_1
GTCCTCAGTCCAGTTA_1	inf_1	8014	2503	302	4	1459	3	3.24432	gfp-hi	gfp-hi	2993	1672	Infected	Batch1	AM_1
GTCCTCAGTGGGTCAA_1	inf_1	3426	1323	85	4	146	3	13.6894	gfp-hi	gfp-hi	2789	1322	Infected	Batch1	IM_3
GTCCTCAGTTCGATTG_1	inf_1	15957	3115	870	4	1602	3	9.30626	gfp-hi	gfp-hi	2621	1048	Infected	Batch1	IM_2
GTCCTCATCGTTCCCA_1	inf_1	3947	1241	506	4	1123	3	21.2313	gfp-hi	gfp-hi	2794	1210	Infected	Batch1	AM_3
GTCGCGATCAGCACCG_1	inf_1	1111	693	111	4	456	3	5.67057	gfp-hi	gfp-hi	2007	713	Infected	Batch1	Monocytes
GTCGTAAAGTTCACTG_1	inf_1	6209	1879	120	4	608	3	3.9781	gfp-hi	gfp-hi	3376	1549	Infected	Batch1	Macrophages/B-cells
GTCGTTCAGCAACAAT_1	inf_1	13264	3164	415	4	1367	3	8.11218	gfp-hi	gfp-hi	2635	1259	Infected	Batch1	AM_1
GTCTACCGTAGTGTGG_1	inf_1	794	447	349	4	345	3	0.881612	gfp-hi	gfp-hi	1946	569	Infected	Batch1	Neutrophils
GTCTCACGTCCCAAAT_1	inf_1	1322	838	325	4	559	3	5.67322	gfp-hi	gfp-hi	1968	845	Infected	Batch1	Monocytes
GTCTCACTCCATCACC_1	inf_1	10179	2891	128	4	1151	3	7.21092	gfp-hi	gfp-hi	2728	1359	Infected	Batch1	IM_3
GTCTGTCGTTTCGACA_1	inf_1	1455	752	474	4	550	3	2.33677	gfp-hi	gfp-hi	2042	756	Infected	Batch1	Neutrophils
GTGAGGAAGGATATAC_1	inf_1	2062	789	152	4	554	3	22.7449	gfp-hi	gfp-hi	2279	789	Infected	Batch1	IM_1
GTGAGGAGTATGAAGT_1	inf_1	1231	658	164	4	1188	3	10.3168	gfp-hi	gfp-hi	2109	672	Infected	Batch1	AM_3
GTGAGTTCACCAGACC_1	inf_1	742	365	456	4	355	3	1.88679	gfp-hi	gfp-hi	1916	505	Infected	Batch1	Neutrophils
GTGAGTTGTTGAGAGC_1	inf_1	3486	1195	455	4	1151	3	20.5106	gfp-hi	gfp-hi	2764	1194	Infected	Batch1	IM_2
GTGCGTGGTCCCAAAT_1	inf_1	1177	621	1355	4	1373	3	1.52931	gfp-hi	gfp-hi	1995	660	Infected	Batch1	Neutrophils
GTGCTTCGTTGTGGAG_1	inf_1	3236	1195	113	4	912	3	10.3832	gfp-hi	gfp-hi	2737	1195	Infected	Batch1	IM_3
GTGGAAGGTAGACACG_1	inf_1	1585	747	212	4	755	3	20.1262	gfp-hi	gfp-hi	2129	747	Infected	Batch1	IM_1
GTGGCGTGTGTTAACC_1	inf_1	13804	3110	197	4	1197	3	9.61316	gfp-hi	gfp-hi	2573	1166	Infected	Batch1	AM_1
GTGGGAAGTTGCACGC_1	inf_1	608	298	290	4	262	3	2.79605	gfp-hi	gfp-hi	1788	468	Infected	Batch1	Neutrophils
GTGGGAATCTCGTGGG_1	inf_1	3500	1319	198	4	1061	3	20.8286	gfp-hi	gfp-hi	2809	1319	Infected	Batch1	IM_2
GTGGTTACATACCGTA_1	inf_1	1067	633	63	3	321	3	4.59231	gfp-hi	gfp-hi	2040	655	Infected	Batch1	Monocytes
GTGTAACAGGATTTCC_1	inf_1	1819	860	119	4	404	3	9.73062	gfp-hi	gfp-hi	2189	860	Infected	Batch1	IM_1
GTGTAACGTCCGGTCA_1	inf_1	1707	774	1871	4	1227	3	32.1031	gfp-hi	gfp-hi	2157	772	Infected	Batch1	IM_1
GTGTCCTGTAGTCACT_1	inf_1	5280	1680	24	4	194	3	16.4583	gfp-hi	gfp-hi	2964	1506	Infected	Batch1	IM_2
GTGTGATGTCACAGAG_1	inf_1	12760	2952	116	4	1130	3	4.52194	gfp-hi	gfp-hi	2590	1148	Infected	Batch1	IM_3
GTGTGATTCTCGTTTA_1	inf_1	3805	1149	128	4	719	3	9.14586	gfp-hi	gfp-hi	2781	1132	Infected	Batch1	IM_2
GTTACCCGTTACGATC_1	inf_1	609	407	86	4	214	3	13.6289	gfp-hi	gfp-hi	1865	562	Infected	Batch1	Monocytes
GTTACGAGTTATGTCG_1	inf_1	3082	1412	138	4	610	3	14.6334	gfp-hi	gfp-hi	2770	1410	Infected	Batch1	IM_3
GTTAGTGGTAATACCC_1	inf_1	1200	683	91	4	344	3	19.25	gfp-hi	gfp-hi	2014	721	Infected	Batch1	IM_1
GTTATGGAGACGAAGA_1	inf_1	3268	1166	90	4	553	3	15.0857	gfp-hi	gfp-hi	2721	1166	Infected	Batch1	IM_3
GTTATGGAGGGCCTCT_1	inf_1	6378	1956	76	4	368	3	6.44403	gfp-hi	gfp-hi	3043	1547	Infected	Batch1	IM_3
GTTCATTTCCTATTTG_1	inf_1	6395	2004	2076	4	2007	3	39.7654	gfp-hi	gfp-hi	2962	1513	Infected	Batch1	Macrophages/T-cells
GTTCGCTCAGAGGACT_1	inf_1	6335	2275	175	4	798	3	8.82399	gfp-hi	gfp-hi	3146	1883	Infected	Batch1	AM_1
GTTCGCTGTATGTCTG_1	inf_1	825	437	231	4	279	3	1.93939	gfp-hi	gfp-hi	1962	555	Infected	Batch1	Neutrophils
GTTCGCTGTGACCGTC_1	inf_1	705	500	251	4	522	3	7.80142	gfp-hi	gfp-hi	1814	652	Infected	Batch1	Monocytes
GTTCGCTTCTCGCAGG_1	inf_1	1440	835	107	4	168	3	2.77778	gfp-hi	gfp-hi	2043	835	Infected	Batch1	Monocytes
GTTGAACGTTGATGTC_1	inf_1	3809	1252	91	4	275	3	5.69703	gfp-hi	gfp-hi	2811	1234	Infected	Batch1	IM_3
GTTGTAGAGCCTCCAG_1	inf_1	1311	659	493	4	944	3	21.5103	gfp-hi	gfp-hi	2086	670	Infected	Batch1	Neutrophils
GTTGTAGCAAGTGGTG_1	inf_1	852	502	82	4	241	3	19.9531	gfp-hi	gfp-hi	2039	611	Infected	Batch1	IM_1
GTTGTAGCACGCTGCA_1	inf_1	5101	1795	98	4	438	3	4.68536	gfp-hi	gfp-hi	3006	1620	Infected	Batch1	IM_3
GTTTACTCATGAGATA_1	inf_1	4948	1671	209	4	812	3	13.2175	gfp-hi	gfp-hi	2971	1504	Infected	Batch1	IM_3
GTTTACTGTGGCACTC_1	inf_1	4261	1691	75	4	1596	3	4.3417	gfp-hi	gfp-hi	2971	1626	Infected	Batch1	IM_3
TAACACGCACACACGC_1	inf_1	1066	727	96	4	230	3	6.66041	gfp-hi	gfp-hi	1940	779	Infected	Batch1	Monocytes
TAACGACCAACCGTGC_1	inf_1	7149	2220	233	4	1462	3	13.7082	gfp-hi	gfp-hi	3026	1626	Infected	Batch1	IM_3
TAAGCCAGTATGCGGA_1	inf_1	3096	1116	112	4	309	3	21.8992	gfp-hi	gfp-hi	2724	1116	Infected	Batch1	IM_3
TAAGCGTAGCGCCCAT_1	inf_1	10269	2415	172	4	897	3	8.08258	gfp-hi	gfp-hi	2585	1075	Infected	Batch1	AM_1
TAAGTCGTCGCTCTCA_1	inf_1	4118	1398	178	4	1374	3	8.08645	gfp-hi	gfp-hi	2861	1351	Infected	Batch1	IM_1
TAATCTCCATACAGCT_1	inf_1	6771	2045	306	4	1096	3	6.05524	gfp-hi	gfp-hi	2994	1563	Infected	Batch1	AM_1
TACAACGGTGCACAAG_1	inf_1	1043	477	244	4	391	3	1.62991	gfp-hi	gfp-hi	2021	562	Infected	Batch1	Neutrophils
TACCCACAGACATAGT_1	inf_1	1718	774	121	4	578	3	12.5728	gfp-hi	gfp-hi	2183	774	Infected	Batch1	IM_2
TACCCGTCATAGGTAA_1	inf_1	3759	1289	155	4	966	3	9.86965	gfp-hi	gfp-hi	2813	1279	Infected	Batch1	IM_2
TACCGGGGTGCGAGTA_1	inf_1	1920	807	302	4	1034	3	22.7083	gfp-hi	gfp-hi	2246	807	Infected	Batch1	AM_3
TACCGGGTCACTGATG_1	inf_1	680	370	247	4	325	3	1.32353	gfp-hi	gfp-hi	1874	519	Infected	Batch1	Neutrophils
TACCTCGCACATCCCT_1	inf_1	1483	752	13	3	205	3	7.14767	gfp-hi	gfp-hi	2144	750	Infected	Batch1	IM_3
TACCTCGGTGGTCTCG_1	inf_1	10708	2779	663	4	2502	3	18.3508	gfp-hi	gfp-hi	2585	1183	Infected	Batch1	IM_3
TACCTGCTCGAAGTGG_1	inf_1	1990	976	102	4	432	3	16.0302	gfp-hi	gfp-hi	2225	976	Infected	Batch1	AM_3
TACGGGCAGACTGTTC_1	inf_1	4696	1750	112	3	723	3	11.1584	gfp-hi	gfp-hi	2964	1634	Infected	Batch1	IM_3
TACGGTAAGGCCTTCG_1	inf_1	7568	2026	143	4	965	3	15.407	gfp-hi	gfp-hi	2975	1404	Infected	Batch1	IM_3
TACGGTAGTTAGAAGT_1	inf_1	2488	931	714	4	879	3	25	gfp-hi	gfp-hi	2481	930	Infected	Batch1	IM_1
TACTGCCCAGTTGTTG_1	inf_1	857	303	763	4	847	3	30.9218	gfp-hi	gfp-hi	2117	415	Infected	Batch1	Neutrophils
TACTTGTAGTCGCGAA_1	inf_1	2644	1040	127	4	1223	3	29.652	gfp-hi	gfp-hi	2568	1038	Infected	Batch1	AM_1
TACTTGTCAGGGCTTC_1	inf_1	3739	1455	118	4	272	3	4.76063	gfp-hi	gfp-hi	2903	1447	Infected	Batch1	IM_2
TACTTGTGTTCTGACA_1	inf_1	3300	1158	135	4	554	3	10.6667	gfp-hi	gfp-hi	2751	1158	Infected	Batch1	IM_2
TAGACCATCCACTGAA_1	inf_1	2361	1218	226	4	718	3	3.81194	gfp-hi	gfp-hi	2376	1217	Infected	Batch1	Neutrophils
TAGACCATCGGCGATC_1	inf_1	1835	857	542	4	1140	3	27.6294	gfp-hi	gfp-hi	2190	856	Infected	Batch1	Monocytes
TAGATCGGTTCTAAGC_1	inf_1	626	427	99	4	443	3	21.4058	gfp-hi	gfp-hi	1870	597	Infected	Batch1	AM_2
TAGCACAAGTTTGTCG_1	inf_1	8603	2261	149	4	851	3	3.33605	gfp-hi	gfp-hi	2831	1328	Infected	Batch1	IM_2
TAGCACAGTAATGCTC_1	inf_1	3319	1284	111	4	385	3	3.31425	gfp-hi	gfp-hi	2801	1284	Infected	Batch1	Monocytes
TAGGTTGCAATAGAGT_1	inf_1	4719	1695	384	4	1262	3	8.66709	gfp-hi	gfp-hi	2942	1571	Infected	Batch1	AM_1
TAGGTTGTCACGGGCT_1	inf_1	4384	1674	102	4	356	3	7.93796	gfp-hi	gfp-hi	2973	1596	Infected	Batch1	IM_3
TATACCTCAAACGTGG_1	inf_1	2620	895	1296	4	710	3	32.4046	gfp-hi	gfp-hi	2554	894	Infected	Batch1	IM_1
TATATCCAGCGGACAT_1	inf_1	6351	1946	487	4	1312	3	9.90395	gfp-hi	gfp-hi	2996	1573	Infected	Batch1	AM_1
TATATCCCAAATTAGG_1	inf_1	3657	1180	103	4	625	3	16.5983	gfp-hi	gfp-hi	2778	1174	Infected	Batch1	IM_3
TATCAGGAGAAGTGTT_1	inf_1	879	473	263	4	291	3	1.59272	gfp-hi	gfp-hi	2030	571	Infected	Batch1	Neutrophils
TATCTGTAGACGGAAA_1	inf_1	1947	1003	265	4	332	3	6.62558	gfp-hi	gfp-hi	2195	1003	Infected	Batch1	Monocytes
TATCTGTTCGAACGGA_1	inf_1	11041	2840	266	4	1296	3	12.8159	gfp-hi	gfp-hi	2521	1149	Infected	Batch1	IM_3
TATGTTCTCACTTTGT_1	inf_1	2185	1072	92	4	782	3	10.7551	gfp-hi	gfp-hi	2294	1072	Infected	Batch1	IM_1
TATTGCTTCATGTCAG_1	inf_1	3112	1385	72	4	460	3	6.2982	gfp-hi	gfp-hi	2773	1383	Infected	Batch1	DC.103+11B-
TATTTCGCAAAGGCAC_1	inf_1	9219	2245	125	4	577	3	5.28257	gfp-hi	gfp-hi	2695	1135	Infected	Batch1	IM_3
TATTTCGGTGCAACGA_1	inf_1	3635	1504	130	4	798	3	9.05089	gfp-hi	gfp-hi	2880	1501	Infected	Batch1	IM_2
TATTTCGGTTCTCTAT_1	inf_1	2099	840	118	4	580	3	23.4874	gfp-hi	gfp-hi	2299	838	Infected	Batch1	IM_1
TCAAGACAGCATACTC_1	inf_1	2526	991	353	4	1097	3	17.498	gfp-hi	gfp-hi	2508	991	Infected	Batch1	Neutrophils
TCAAGTGGTATGAGGC_1	inf_1	1693	764	66	3	163	3	10.3367	gfp-hi	gfp-hi	2183	764	Infected	Batch1	IM_1
TCAATCTAGTCTGGAG_1	inf_1	5143	1526	857	4	1519	3	15.1468	gfp-hi	gfp-hi	2949	1356	Infected	Batch1	Neutrophils
TCAATTCGTCTAGATC_1	inf_1	4251	1331	94	4	569	3	12.0913	gfp-hi	gfp-hi	2849	1267	Infected	Batch1	IM_3
TCACAAGCACACCAGC_1	inf_1	11021	2489	174	4	1105	3	8.15715	gfp-hi	gfp-hi	2547	1011	Infected	Batch1	IM_3
TCAGCAAGTGCGGCTT_1	inf_1	1427	658	137	4	1056	3	14.576	gfp-hi	gfp-hi	2136	659	Infected	Batch1	IM_4
TCAGCCTGTGCTCGTG_1	inf_1	2074	943	102	4	592	3	18.5149	gfp-hi	gfp-hi	2265	940	Infected	Batch1	IM_1
TCAGGTACAAAGGCTG_1	inf_1	3246	1357	94	4	362	3	4.65188	gfp-hi	gfp-hi	2806	1356	Infected	Batch1	DC.103+11B-
TCAGTCCGTAAGGCTG_1	inf_1	6211	2304	603	4	1189	3	6.02157	gfp-hi	gfp-hi	3160	1923	Infected	Batch1	AM_1
TCAGTGACATGAAGGC_1	inf_1	848	442	173	4	940	3	29.3632	gfp-hi	gfp-hi	2121	535	Infected	Batch1	AM_2
TCATACTCAGAGACTG_1	inf_1	2468	995	658	4	1287	3	27.269	gfp-hi	gfp-hi	2464	991	Infected	Batch1	AM_1
TCATACTCATTGCCTC_1	inf_1	1554	698	612	4	657	3	1.35135	gfp-hi	gfp-hi	2092	699	Infected	Batch1	Neutrophils
TCATCCGAGTTGAATG_1	inf_1	7670	2494	231	4	1388	3	3.84615	gfp-hi	gfp-hi	3047	1787	Infected	Batch1	AM_1
TCATGAGCACGAGAAC_1	inf_1	1588	711	631	4	1591	3	15.5542	gfp-hi	gfp-hi	2179	711	Infected	Batch1	AM_3
TCATGTTTCAGGCGAA_1	inf_1	1520	754	117	4	413	3	22.4342	gfp-hi	gfp-hi	2138	756	Infected	Batch1	IM_1
TCATTACGTGCCTACG_1	inf_1	2802	1287	87	4	553	3	18.5939	gfp-hi	gfp-hi	2662	1287	Infected	Batch1	IM_1
TCATTACTCAAGATAG_1	inf_1	3994	1625	635	4	880	3	13.1698	gfp-hi	gfp-hi	2929	1590	Infected	Batch1	AM_1
TCATTCAAGACCAGCA_1	inf_1	3649	1228	0	0	957	3	18.9367	gfp-hi	gfp-hi	2776	1215	Infected	Batch1	IM_3
TCCACGTAGACATCAA_1	inf_1	593	356	224	4	373	3	1.18044	gfp-hi	gfp-hi	1765	531	Infected	Batch1	Neutrophils
TCCACGTCACGCTTAA_1	inf_1	1114	605	81	3	279	3	16.5171	gfp-hi	gfp-hi	1977	675	Infected	Batch1	IM_1
TCCATGCTCTGTCGTC_1	inf_1	4060	1178	75	4	510	3	9.95074	gfp-hi	gfp-hi	2807	1144	Infected	Batch1	IM_3
TCCCACAAGACTAAGT_1	inf_1	614	430	87	4	171	3	9.60912	gfp-hi	gfp-hi	1761	606	Infected	Batch1	Monocytes
TCCCACACATTGAGCT_1	inf_1	1700	974	164	4	536	3	7	gfp-hi	gfp-hi	2063	971	Infected	Batch1	Monocytes
TCCCACATCCGCTGTT_1	inf_1	865	556	346	4	424	3	1.15607	gfp-hi	gfp-hi	1953	653	Infected	Batch1	Neutrophils
TCCCACATCGCTACGG_1	inf_1	1898	922	75	4	408	3	17.4394	gfp-hi	gfp-hi	2186	919	Infected	Batch1	IM_1
TCCCATGAGGAAAGAC_1	inf_1	2381	962	1087	4	2100	3	33.7253	gfp-hi	gfp-hi	2412	962	Infected	Batch1	AM_4
TCCTAATAGCTAAACA_1	inf_1	3530	1180	140	4	882	3	25.6091	gfp-hi	gfp-hi	2781	1177	Infected	Batch1	IM_3
TCCTAATTCACTACGA_1	inf_1	3465	1025	917	4	1295	3	39.5094	gfp-hi	gfp-hi	2726	1024	Infected	Batch1	AM_3
TCCTCCCAGTCGAATA_1	inf_1	3982	1291	138	4	1113	3	25.6906	gfp-hi	gfp-hi	2811	1269	Infected	Batch1	AM_3
TCCTCCCTCTGCTGAA_1	inf_1	14070	3127	150	4	1107	3	5.12438	gfp-hi	gfp-hi	2624	1202	Infected	Batch1	AM_1
TCCTGCATCCTACACC_1	inf_1	2633	1365	110	4	470	3	16.7869	gfp-hi	gfp-hi	2590	1362	Infected	Batch1	IM_1
TCCTTTCTCACTCTTA_1	inf_1	5945	1864	537	4	1396	3	20.6897	gfp-hi	gfp-hi	3026	1547	Infected	Batch1	IM_1
TCGAACATCGACGTCG_1	inf_1	3324	1281	116	4	592	3	6.85921	gfp-hi	gfp-hi	2793	1279	Infected	Batch1	IM_1
TCGACGGCAAGTTCGT_1	inf_1	7114	2052	178	4	1388	3	7.94209	gfp-hi	gfp-hi	2985	1485	Infected	Batch1	IM_2
TCGATTTTCCCGAGAC_1	inf_1	6617	1841	97	4	771	3	1.37525	gfp-hi	gfp-hi	2917	1416	Infected	Batch1	AM_1
TCGATTTTCCTGTACC_1	inf_1	4609	1767	186	4	1258	3	8.00608	gfp-hi	gfp-hi	2968	1663	Infected	Batch1	AM_1
TCGATTTTCTCTTGCG_1	inf_1	1585	833	102	3	430	3	6.81388	gfp-hi	gfp-hi	2083	833	Infected	Batch1	Monocytes
TCGCACTTCTGAATCG_1	inf_1	2438	999	426	4	1316	3	28.0968	gfp-hi	gfp-hi	2446	999	Infected	Batch1	AM_3
TCGCAGGCACTGCATA_1	inf_1	1167	660	814	4	887	3	26.3925	gfp-hi	gfp-hi	1989	725	Infected	Batch1	IM_1
TCGCTCACAACACTAC_1	inf_1	2519	1235	397	4	1630	3	8.77332	gfp-hi	gfp-hi	2512	1234	Infected	Batch1	Macrophages/B-cells
TCGGTCTTCAGTCACA_1	inf_1	3191	1481	97	4	259	3	5.4215	gfp-hi	gfp-hi	2823	1481	Infected	Batch1	Monocytes
TCGTGCTGTTGAATCC_1	inf_1	3670	1214	56	4	424	3	17.4932	gfp-hi	gfp-hi	2790	1207	Infected	Batch1	IM_3
TCGTGCTTCCTGTAGA_1	inf_1	2961	1205	88	4	394	3	13.205	gfp-hi	gfp-hi	2688	1205	Infected	Batch1	IM_2
TCTAACTAGATAACGT_1	inf_1	2948	1158	81	4	308	3	14.1113	gfp-hi	gfp-hi	2671	1157	Infected	Batch1	IM_3
TCTACATGTTCTTGTT_1	inf_1	3437	1391	205	4	1031	3	15.915	gfp-hi	gfp-hi	2803	1390	Infected	Batch1	AM_3
TCTACCGTCGTGCTCT_1	inf_1	6857	1846	63	4	276	3	5.99387	gfp-hi	gfp-hi	2919	1382	Infected	Batch1	IM_3
TCTATACAGGTGGTTG_1	inf_1	8416	2405	487	4	1410	3	8.5076	gfp-hi	gfp-hi	2819	1449	Infected	Batch1	AM_1
TCTATCAAGTTAGTGA_1	inf_1	822	425	261	4	172	3	1.58151	gfp-hi	gfp-hi	2014	522	Infected	Batch1	Neutrophils
TCTATCACAAAGCACG_1	inf_1	2190	1054	100	4	213	3	7.26027	gfp-hi	gfp-hi	2294	1054	Infected	Batch1	IM_2
TCTATCACATACCATG_1	inf_1	4376	1642	69	4	340	3	9.07221	gfp-hi	gfp-hi	2949	1580	Infected	Batch1	IM_3
TCTCACGAGAGAGTTT_1	inf_1	10585	2862	514	4	1390	3	3.30657	gfp-hi	gfp-hi	2557	1208	Infected	Batch1	Macrophages/B-cells
TCTCACGCAGCGTAGA_1	inf_1	3529	1552	310	4	1331	3	13.2049	gfp-hi	gfp-hi	2868	1552	Infected	Batch1	AM_1
TCTCAGCCACCGGTCA_1	inf_1	4373	1651	4139	4	918	3	11.8454	gfp-hi	gfp-hi	2981	1582	Infected	Batch1	IM_2
TCTCAGCTCACCATGA_1	inf_1	2972	1255	101	4	212	3	9.5895	gfp-hi	gfp-hi	2706	1255	Infected	Batch1	IM_2
TCTCAGCTCCAGTACA_1	inf_1	1528	848	92	4	418	3	4.38482	gfp-hi	gfp-hi	2094	847	Infected	Batch1	Monocytes
TCTGCCAAGTAAACAC_1	inf_1	10759	2448	116	4	978	3	6.18087	gfp-hi	gfp-hi	2539	1048	Infected	Batch1	IM_3
TCTGCCATCGCTGACG_1	inf_1	4586	1781	135	4	681	3	2.83471	gfp-hi	gfp-hi	2974	1686	Infected	Batch1	IM_2
TCTGGCTAGTGGAAGA_1	inf_1	783	394	462	4	299	3	1.91571	gfp-hi	gfp-hi	1939	535	Infected	Batch1	Neutrophils
TCTGGCTGTTCTCAGA_1	inf_1	2561	880	85	3	219	3	0.390472	gfp-hi	gfp-hi	2531	880	Infected	Batch1	AM_3
TCTGTCGAGGTATAGT_1	inf_1	2858	1151	228	4	1287	3	25.6823	gfp-hi	gfp-hi	2646	1148	Infected	Batch1	IM_1
TCTGTCGTCAGCGCGT_1	inf_1	7268	2208	207	4	917	3	7.8426	gfp-hi	gfp-hi	3025	1612	Infected	Batch1	AM_4
TCTTAGTCAACAGCTT_1	inf_1	2737	1087	111	4	540	3	11.9109	gfp-hi	gfp-hi	2608	1087	Infected	Batch1	IM_1
TCTTAGTCAAGAATGT_1	inf_1	1902	922	120	4	611	3	16.5615	gfp-hi	gfp-hi	2213	922	Infected	Batch1	AM_2
TCTTGCGAGATGCAGC_1	inf_1	2724	998	219	4	1071	3	19.8605	gfp-hi	gfp-hi	2583	998	Infected	Batch1	IM_3
TGAACGTTCTTAGGAC_1	inf_1	2293	1088	51	4	370	3	14.7841	gfp-hi	gfp-hi	2350	1088	Infected	Batch1	Macrophages/T-cells
TGAATGCTCGACGCGT_1	inf_1	919	520	83	4	731	3	22.0892	gfp-hi	gfp-hi	2128	602	Infected	Batch1	IM_1
TGACAGTAGGTACAGC_1	inf_1	5914	1940	294	4	920	3	4.73453	gfp-hi	gfp-hi	3018	1653	Infected	Batch1	AM_1
TGACGCGTCGTCCATC_1	inf_1	4577	1508	39	4	217	3	7.07887	gfp-hi	gfp-hi	2908	1420	Infected	Batch1	IM_2
TGACTCCAGGGCAGAG_1	inf_1	574	385	282	4	423	3	2.09059	gfp-hi	gfp-hi	1760	556	Infected	Batch1	Neutrophils
TGACTCCAGGTCACCC_1	inf_1	5072	1848	275	4	1213	3	14.9842	gfp-hi	gfp-hi	3036	1681	Infected	Batch1	AM_1
TGACTCCGTGGGTCAA_1	inf_1	10803	2748	540	4	1438	3	4.31362	gfp-hi	gfp-hi	2552	1171	Infected	Batch1	AM_1
TGAGGAGAGGCAGCTA_1	inf_1	1115	512	358	4	419	3	1.34529	gfp-hi	gfp-hi	1994	578	Infected	Batch1	Neutrophils
TGAGGGAAGTCGAGGT_1	inf_1	1599	924	136	4	297	3	4.25266	gfp-hi	gfp-hi	2066	924	Infected	Batch1	Monocytes
TGAGGGAGTATGCTTG_1	inf_1	5597	1870	98	4	511	3	5.78882	gfp-hi	gfp-hi	3070	1665	Infected	Batch1	AM_1
TGAGGTTAGAAGGTAG_1	inf_1	5930	1588	97	4	363	3	4.55312	gfp-hi	gfp-hi	2923	1306	Infected	Batch1	IM_3
TGATCTTCACGCTGCA_1	inf_1	8859	2682	188	4	997	3	10.5768	gfp-hi	gfp-hi	2914	1581	Infected	Batch1	AM_1
TGATCTTGTCCAGCAC_1	inf_1	681	332	221	4	537	3	4.99266	gfp-hi	gfp-hi	1891	490	Infected	Batch1	Neutrophils
TGATTTCAGGTGATAT_1	inf_1	1754	851	70	4	354	3	10.8324	gfp-hi	gfp-hi	2181	851	Infected	Batch1	IM_3
TGCAGATCAGGTTCCG_1	inf_1	12407	2898	377	4	1364	3	5.40018	gfp-hi	gfp-hi	2568	1069	Infected	Batch1	IM_2
TGCAGGCAGACAGCGT_1	inf_1	1246	609	42	4	350	3	5.37721	gfp-hi	gfp-hi	2153	617	Infected	Batch1	IM_4
TGCAGGCCAATAGTAG_1	inf_1	12068	2768	604	4	1568	3	6.36394	gfp-hi	gfp-hi	2538	1091	Infected	Batch1	AM_1
TGCAGTAGTAACATGA_1	inf_1	988	531	76	4	118	3	3.23887	gfp-hi	gfp-hi	2011	577	Infected	Batch1	Neutrophils
TGCAGTAGTCTTCTAT_1	inf_1	2004	754	252	4	939	3	27.1956	gfp-hi	gfp-hi	2272	753	Infected	Batch1	IM_1
TGCATGAGTCCTGGGT_1	inf_1	4262	1371	115	4	824	3	11.0277	gfp-hi	gfp-hi	2888	1311	Infected	Batch1	IM_3
TGCATGATCGTTCTAT_1	inf_1	3288	1340	768	4	927	3	4.07543	gfp-hi	gfp-hi	2804	1340	Infected	Batch1	Neutrophils
TGCCGAGGTATGAGGC_1	inf_1	3535	1517	113	4	396	3	15.0495	gfp-hi	gfp-hi	2885	1517	Infected	Batch1	IM_3
TGCCGAGGTCACGTGC_1	inf_1	1669	813	156	4	1277	3	19.2331	gfp-hi	gfp-hi	2159	812	Infected	Batch1	AM_2
TGCCGAGGTGGGTATG_1	inf_1	10967	2648	535	4	904	3	3.88438	gfp-hi	gfp-hi	2584	1078	Infected	Batch1	IM_2
TGCGACGGTATGCGGA_1	inf_1	2482	928	307	4	921	3	21.4746	gfp-hi	gfp-hi	2477	927	Infected	Batch1	IM_1
TGCGATACAGGAACCA_1	inf_1	2578	1209	117	4	330	3	22.149	gfp-hi	gfp-hi	2543	1207	Infected	Batch1	IM_1
TGCTCCATCCACTGGG_1	inf_1	522	341	79	4	116	3	1.53257	gfp-hi	gfp-hi	1845	507	Infected	Batch1	AM_3
TGCTGAAAGCGTCTCG_1	inf_1	6873	1845	137	4	678	3	4.94689	gfp-hi	gfp-hi	2936	1370	Infected	Batch1	IM_3
TGCTGAAAGTTGGAAT_1	inf_1	2137	832	347	4	1014	3	15.9569	gfp-hi	gfp-hi	2303	832	Infected	Batch1	IM_1
TGCTTCGAGTTCGGTT_1	inf_1	3467	1236	150	4	491	3	23.3055	gfp-hi	gfp-hi	2810	1235	Infected	Batch1	IM_2
TGCTTGCAGAGGTGCT_1	inf_1	4753	1720	559	4	1320	3	18.3673	gfp-hi	gfp-hi	2979	1592	Infected	Batch1	IM_1
TGGAACTTCCAGTGTA_1	inf_1	896	545	74	4	333	3	9.04018	gfp-hi	gfp-hi	2012	620	Infected	Batch1	Monocytes
TGGAGAGCACGTGTGC_1	inf_1	7473	2409	489	4	1478	3	7.84156	gfp-hi	gfp-hi	3064	1738	Infected	Batch1	AM_4
TGGAGAGTCAGTGTCA_1	inf_1	1058	601	381	4	731	3	8.22306	gfp-hi	gfp-hi	2061	666	Infected	Batch1	Neutrophils
TGGGAAGCAAATGCGG_1	inf_1	884	482	126	3	362	3	15.3846	gfp-hi	gfp-hi	2096	546	Infected	Batch1	IM_4
TGGGAGAGTAGTCGGA_1	inf_1	1230	503	420	4	501	3	0.97561	gfp-hi	gfp-hi	2073	545	Infected	Batch1	Neutrophils
TGGGAGATCCGGTAGC_1	inf_1	1703	815	1069	4	1148	3	3.58191	gfp-hi	gfp-hi	2126	810	Infected	Batch1	Neutrophils
TGGGAGATCTGGAAGG_1	inf_1	1600	744	446	4	1168	3	15.125	gfp-hi	gfp-hi	2188	744	Infected	Batch1	AM_3
TGGGATTGTCCGGCAT_1	inf_1	1471	830	89	4	391	3	18.4228	gfp-hi	gfp-hi	2034	831	Infected	Batch1	IM_1
TGGGCGTAGTTGCGCC_1	inf_1	3642	1297	311	4	1070	3	14.7721	gfp-hi	gfp-hi	2777	1290	Infected	Batch1	IM_2
TGGGCGTCAAGTGGCA_1	inf_1	1626	602	107	4	832	3	38.5609	gfp-hi	gfp-hi	2219	601	Infected	Batch1	AM_2
TGGTACATCTATACTC_1	inf_1	728	377	174	4	308	3	1.23626	gfp-hi	gfp-hi	1824	528	Infected	Batch1	Neutrophils
TGGTAGTGTCACAGTT_1	inf_1	3627	1197	501	4	1315	3	23.1872	gfp-hi	gfp-hi	2763	1187	Infected	Batch1	AM_3
TGGTGATGTACCACGC_1	inf_1	3860	1458	172	4	939	3	12.7461	gfp-hi	gfp-hi	2881	1432	Infected	Batch1	IM_1
TGGTGATGTTCTCGCT_1	inf_1	1557	907	90	4	359	3	3.27553	gfp-hi	gfp-hi	2047	907	Infected	Batch1	Monocytes
TGGTGATGTTTAGTCG_1	inf_1	4891	1486	110	4	937	3	1.79922	gfp-hi	gfp-hi	2847	1332	Infected	Batch1	AM_1
TGGTGATTCGAGCTGC_1	inf_1	1223	533	149	4	1316	3	30.1717	gfp-hi	gfp-hi	2185	551	Infected	Batch1	AM_2
TGGTTAGAGCTAAACA_1	inf_1	4278	1478	406	4	1369	3	14.9836	gfp-hi	gfp-hi	2882	1425	Infected	Batch1	AM_1
TGGTTAGCAAGATTGA_1	inf_1	1918	865	116	4	580	3	19.708	gfp-hi	gfp-hi	2223	865	Infected	Batch1	IM_1
TGGTTAGCACTAGTAC_1	inf_1	1872	945	98	4	503	3	14.0491	gfp-hi	gfp-hi	2158	944	Infected	Batch1	IM_1
TGTACAGGTGTGTCCG_1	inf_1	1358	840	101	4	373	3	4.56554	gfp-hi	gfp-hi	2021	842	Infected	Batch1	Monocytes
TGTACAGTCTACTCAT_1	inf_1	779	376	233	4	327	3	1.41207	gfp-hi	gfp-hi	1982	511	Infected	Batch1	Neutrophils
TGTCAGAAGTCGCTAT_1	inf_1	4679	1796	176	4	1108	3	9.14725	gfp-hi	gfp-hi	2991	1706	Infected	Batch1	AM_1
TGTCAGATCGGCTGTG_1	inf_1	15409	3246	259	4	1140	3	3.68616	gfp-hi	gfp-hi	2708	1282	Infected	Batch1	AM_1
TGTGAGTGTAATGCGG_1	inf_1	1146	611	660	4	633	3	32.2862	gfp-hi	gfp-hi	2046	678	Infected	Batch1	IM_1
TGTGATGCAAATCCCA_1	inf_1	2510	977	1051	4	1320	3	0.557769	gfp-hi	gfp-hi	2501	976	Infected	Batch1	Neutrophils
TGTGATGCATCGTGCG_1	inf_1	1794	607	972	4	2097	3	25.1394	gfp-hi	gfp-hi	2231	607	Infected	Batch1	Neutrophils
TGTGGCGGTATAGGAT_1	inf_1	6942	1928	126	4	500	3	2.82339	gfp-hi	gfp-hi	2954	1459	Infected	Batch1	IM_3
TGTGTGAAGGAGAGTA_1	inf_1	2514	940	90	4	80	3	0.318218	gfp-hi	gfp-hi	2500	939	Infected	Batch1	AM_3
TGTTACTAGCCTCGTG_1	inf_1	919	602	85	4	169	3	2.72035	gfp-hi	gfp-hi	2049	653	Infected	Batch1	Monocytes
TGTTCATAGTTTGCTG_1	inf_1	1105	464	476	4	411	3	22.5339	gfp-hi	gfp-hi	2142	542	Infected	Batch1	Neutrophils
TGTTGAGTCTAGTCAG_1	inf_1	2056	1034	115	4	663	3	5.30156	gfp-hi	gfp-hi	2256	1033	Infected	Batch1	IM_2
TGTTGGAGTGAATATG_1	inf_1	9681	2400	100	4	696	3	4.8652	gfp-hi	gfp-hi	2662	1158	Infected	Batch1	IM_3
TGTTTGTCAGTCGGTC_1	inf_1	2248	1144	177	4	830	3	15.6139	gfp-hi	gfp-hi	2313	1144	Infected	Batch1	IM_2
TGTTTGTGTCACGTGC_1	inf_1	783	395	576	4	989	3	28.4802	gfp-hi	gfp-hi	2084	492	Infected	Batch1	Neutrophils
TTACCGCGTTTCACAG_1	inf_1	2544	1177	96	4	350	3	16.5094	gfp-hi	gfp-hi	2528	1177	Infected	Batch1	IM_3
TTACGCCAGATCGCTT_1	inf_1	13911	3143	335	4	1243	3	6.2828	gfp-hi	gfp-hi	2540	1127	Infected	Batch1	AM_1
TTACGCCTCACGAGGA_1	inf_1	3302	1372	72	4	457	3	1.45366	gfp-hi	gfp-hi	2807	1370	Infected	Batch1	Monocytes
TTACGTTTCCCATTTA_1	inf_1	10652	2726	121	4	1385	3	7.97033	gfp-hi	gfp-hi	2644	1185	Infected	Batch1	IM_3
TTACTGTTCTAGCATG_1	inf_1	1330	565	177	4	216	3	28.0451	gfp-hi	gfp-hi	2171	575	Infected	Batch1	IM_1
TTAGGGTCATCTCGTC_1	inf_1	4160	1204	84	4	520	3	8.94231	gfp-hi	gfp-hi	2781	1160	Infected	Batch1	IM_3
TTAGTCTAGGACTTCT_1	inf_1	2888	1131	230	4	882	3	24.2036	gfp-hi	gfp-hi	2667	1130	Infected	Batch1	IM_3
TTATTGCCAAGTCCCG_1	inf_1	2224	1022	737	4	907	3	3.32734	gfp-hi	gfp-hi	2306	1022	Infected	Batch1	Neutrophils
TTCAATCGTATTGACC_1	inf_1	4617	1590	75	4	249	3	5.54473	gfp-hi	gfp-hi	2909	1488	Infected	Batch1	IM_3
TTCAGGACAAAGAGTT_1	inf_1	4282	1543	117	4	373	3	11.2564	gfp-hi	gfp-hi	2903	1483	Infected	Batch1	IM_3
TTCATGTAGTTGTCAC_1	inf_1	3682	1479	187	4	465	3	16.1325	gfp-hi	gfp-hi	2875	1464	Infected	Batch1	AM_1
TTCATGTGTCATACCA_1	inf_1	705	461	96	4	369	3	18.8652	gfp-hi	gfp-hi	1899	597	Infected	Batch1	Monocytes
TTCATTGAGTCCCGAC_1	inf_1	936	620	80	4	383	3	9.40171	gfp-hi	gfp-hi	2048	694	Infected	Batch1	Monocytes
TTCCACGAGTCATGGG_1	inf_1	10379	2477	228	4	1214	3	6.82147	gfp-hi	gfp-hi	2641	1126	Infected	Batch1	IM_3
TTCCACGTCGCTTGCT_1	inf_1	13555	2482	146	4	706	3	5.18628	gfp-hi	gfp-hi	3077	823	Infected	Batch1	Macrophages/B-cells
TTCCGGTAGAAGTCCG_1	inf_1	1709	833	137	4	691	3	18.6659	gfp-hi	gfp-hi	2153	833	Infected	Batch1	AM_2
TTCCGGTCAGAAGTGC_1	inf_1	990	629	266	4	307	3	1.71717	gfp-hi	gfp-hi	2055	704	Infected	Batch1	Neutrophils
TTCCTTCAGTCGCGAA_1	inf_1	1836	894	62	4	270	3	5.99129	gfp-hi	gfp-hi	2166	893	Infected	Batch1	DC.103+11B-
TTCGATTTCTTACACT_1	inf_1	3665	1446	211	4	1199	3	12.3874	gfp-hi	gfp-hi	2842	1437	Infected	Batch1	AM_1
TTCGGTCAGCGACTAG_1	inf_1	1227	628	54	4	216	3	14.2624	gfp-hi	gfp-hi	2149	640	Infected	Batch1	IM_4
TTCTAGTCAGCATCTA_1	inf_1	7417	2047	83	4	400	3	8.99285	gfp-hi	gfp-hi	2959	1429	Infected	Batch1	IM_3
TTCTCTCAGAGGCTGT_1	inf_1	8524	2332	387	4	1237	3	6.00657	gfp-hi	gfp-hi	2790	1371	Infected	Batch1	AM_1
TTCTGTATCCATACTT_1	inf_1	836	418	98	4	1348	3	27.0335	gfp-hi	gfp-hi	2107	512	Infected	Batch1	AM_2
TTCTTCCGTTCTTAGG_1	inf_1	2956	1217	465	4	1009	3	20.9066	gfp-hi	gfp-hi	2698	1217	Infected	Batch1	IM_1
TTCTTGATCTCTCGCA_1	inf_1	4894	1618	76	4	315	3	9.03147	gfp-hi	gfp-hi	2945	1450	Infected	Batch1	IM_3
TTGACCCTCCGTAGTA_1	inf_1	9680	2552	100	4	520	3	7.09711	gfp-hi	gfp-hi	2769	1252	Infected	Batch1	IM_3
TTGACCCTCTGCTTTA_1	inf_1	11844	2709	1264	4	1317	3	11.1027	gfp-hi	gfp-hi	2577	1140	Infected	Batch1	AM_1
TTGATGGGTATTCTCT_1	inf_1	11415	2896	147	4	1025	3	6.64915	gfp-hi	gfp-hi	2534	1138	Infected	Batch1	AM_1
TTGCCTGGTCGTCAGC_1	inf_1	6071	1889	452	4	1165	3	7.47817	gfp-hi	gfp-hi	3002	1565	Infected	Batch1	IM_2
TTGCCTGTCCTCGATC_1	inf_1	8440	2518	284	4	1009	3	6.63507	gfp-hi	gfp-hi	2989	1592	Infected	Batch1	AM_1
TTGCCTGTCCTGTTGC_1	inf_1	1935	910	353	4	882	3	7.64858	gfp-hi	gfp-hi	2178	908	Infected	Batch1	Neutrophils
TTGCCTGTCGCAGTCG_1	inf_1	6359	1817	218	4	1239	3	6.54191	gfp-hi	gfp-hi	2938	1415	Infected	Batch1	AM_1
TTGCTGCCATCGATCA_1	inf_1	5148	1827	282	4	973	3	3.63248	gfp-hi	gfp-hi	3027	1662	Infected	Batch1	AM_1
TTGCTGCGTGGATCAG_1	inf_1	526	366	85	4	265	3	10.076	gfp-hi	gfp-hi	1818	544	Infected	Batch1	Monocytes
TTGGATGTCTGTCCCA_1	inf_1	7053	2321	142	4	1169	3	10.9882	gfp-hi	gfp-hi	3130	1747	Infected	Batch1	AM_1
TTGGGATAGTTGCGCC_1	inf_1	1098	493	571	4	795	3	28.8707	gfp-hi	gfp-hi	2135	566	Infected	Batch1	Neutrophils
TTGGGCGAGGGTGGGA_1	inf_1	4449	1577	371	4	491	3	11.4633	gfp-hi	gfp-hi	2943	1492	Infected	Batch1	IM_3
TTGGTTTTCCCAGGCA_1	inf_1	3279	1357	637	4	959	3	33.0894	gfp-hi	gfp-hi	2794	1354	Infected	Batch1	IM_1
TTGTGGAGTCGAGCTC_1	inf_1	7444	2165	229	4	1067	3	7.4288	gfp-hi	gfp-hi	2947	1532	Infected	Batch1	AM_1
TTGTGTTAGCCACCGT_1	inf_1	1333	797	74	4	222	3	6.90173	gfp-hi	gfp-hi	2021	800	Infected	Batch1	Monocytes
TTGTTCATCCAGCAAT_1	inf_1	2963	1317	67	4	239	3	3.17246	gfp-hi	gfp-hi	2716	1315	Infected	Batch1	Monocytes
TTTCACACATTAGGAA_1	inf_1	5158	1805	734	4	1211	3	16.7313	gfp-hi	gfp-hi	3000	1641	Infected	Batch1	AM_1
TTTCACAGTCGGTGAA_1	inf_1	4248	1542	259	4	1133	3	9.48682	gfp-hi	gfp-hi	2880	1476	Infected	Batch1	AM_1
TTTCACAGTTCGTACA_1	inf_1	936	553	92	4	199	3	10.1496	gfp-hi	gfp-hi	2133	605	Infected	Batch1	IM_4
TTTCAGTAGGTGAGCT_1	inf_1	5767	1551	271	4	1240	3	27.9868	gfp-hi	gfp-hi	2906	1298	Infected	Batch1	AM_1
TTTCATGCATCAGTCA_1	inf_1	1190	590	1116	4	1278	3	27.479	gfp-hi	gfp-hi	2151	619	Infected	Batch1	AM_4
TTTCGATGTCTGTGTA_1	inf_1	566	353	151	4	323	3	2.12014	gfp-hi	gfp-hi	1771	526	Infected	Batch1	Neutrophils
TTTGACTTCGTTAGTG_1	inf_1	8064	2186	419	4	1342	3	10.3795	gfp-hi	gfp-hi	2821	1364	Infected	Batch1	AM_1
TTTGATCCACTGGCCA_1	inf_1	4819	1600	95	4	359	3	1.01681	gfp-hi	gfp-hi	2913	1480	Infected	Batch1	AM_1
TTTGGTTCACTTGAAC_1	inf_1	2613	1219	89	4	461	3	11.8638	gfp-hi	gfp-hi	2567	1219	Infected	Batch1	IM_3
TTTGGTTGTCAGACGA_1	inf_1	4379	1817	955	4	1508	3	5.04681	gfp-hi	gfp-hi	3037	1740	Infected	Batch1	Macrophages/T-cells
TTTGGTTTCGACCATA_1	inf_1	2924	1085	236	4	1025	3	23.5636	gfp-hi	gfp-hi	2657	1084	Infected	Batch1	AM_1
AAACCCATCGGCAGTC_1	inf_1	4225	1357	1035	4	1425	3	38.9822	gfp-low	gfp-low	2842	1281	Infected	Batch1	AM_1
AAACGAAGTCATCAGT_1	inf_1	5354	1883	1108	4	1366	3	8.53567	gfp-low	gfp-low	3038	1699	Infected	Batch1	AM_1
AAACGAATCCATTCGC_1	inf_1	7604	2428	608	4	1228	3	8.00894	gfp-low	gfp-low	3060	1751	Infected	Batch1	AM_1
AAACGAATCTGCGTCT_1	inf_1	9506	2768	695	4	449	3	8.58405	gfp-low	gfp-low	2750	1419	Infected	Batch1	AM_1
AAAGAACGTGGGTTGA_1	inf_1	4707	1704	613	4	1157	3	10.6012	gfp-low	gfp-low	2941	1603	Infected	Batch1	AM_3
AAAGGATCAAATAGCA_1	inf_1	3926	1559	613	4	1298	3	12.812	gfp-low	gfp-low	2874	1522	Infected	Batch1	AM_1
AAAGGATGTCCCACGA_1	inf_1	5959	2208	259	4	1041	3	7.93757	gfp-low	gfp-low	3167	1903	Infected	Batch1	Macrophages/B-cells
AAAGGGCGTACCTAGT_1	inf_1	2558	1234	670	4	1217	3	17.24	gfp-low	gfp-low	2531	1234	Infected	Batch1	AM_4
AAAGGGCTCGTTCTCG_1	inf_1	8183	2315	1787	4	1315	3	18.7951	gfp-low	gfp-low	2825	1410	Infected	Batch1	AM_1
AAAGGTAAGGAAGTGA_1	inf_1	6663	2197	452	4	896	3	8.80985	gfp-low	gfp-low	3105	1750	Infected	Batch1	AM_1
AAAGGTAAGGCGCTCT_1	inf_1	8527	2207	589	4	1390	3	16.3481	gfp-low	gfp-low	2761	1259	Infected	Batch1	IM_2
AAAGGTACAAGTCATC_1	inf_1	1623	823	100	4	340	3	29.6981	gfp-low	gfp-low	2106	823	Infected	Batch1	IM_1
AAAGGTACAAGTTCCA_1	inf_1	2077	980	92	4	368	3	11.6514	gfp-low	gfp-low	2248	980	Infected	Batch1	IM_1
AAAGGTAGTAGCTGCC_1	inf_1	818	513	103	4	215	3	20.7824	gfp-low	gfp-low	1989	631	Infected	Batch1	Monocytes
AAAGGTATCACCCATC_1	inf_1	11197	2976	131	4	336	3	6.81433	gfp-low	gfp-low	2591	1255	Infected	Batch1	AM_1
AAAGTCCAGCAGTCTT_1	inf_1	2900	1177	749	4	1081	3	23.6552	gfp-low	gfp-low	2670	1177	Infected	Batch1	AM_4
AAAGTCCGTAACGGTG_1	inf_1	9525	2626	612	4	1273	3	10.4252	gfp-low	gfp-low	2706	1287	Infected	Batch1	AM_1
AAAGTGACAACTGAAA_1	inf_1	1053	502	586	4	664	3	2.94397	gfp-low	gfp-low	2071	585	Infected	Batch1	Neutrophils
AAAGTGACACAATTCG_1	inf_1	2268	1088	146	4	1048	3	13.7125	gfp-low	gfp-low	2333	1088	Infected	Batch1	AM_1
AAAGTGAGTTGCCATA_1	inf_1	844	515	115	4	459	3	8.17536	gfp-low	gfp-low	1990	603	Infected	Batch1	IM_1
AAAGTGATCATTGGTG_1	inf_1	6689	1856	2761	4	1336	3	13.9483	gfp-low	gfp-low	2878	1376	Infected	Batch1	AM_1
AAAGTGATCCACAGGC_1	inf_1	8049	2639	329	4	971	3	9.88943	gfp-low	gfp-low	3041	1777	Infected	Batch1	AM_1
AACAAAGAGGTCTGGA_1	inf_1	2935	1189	203	4	788	3	23.2709	gfp-low	gfp-low	2681	1189	Infected	Batch1	AM_1
AACAAAGGTGTAAATG_1	inf_1	5404	1985	243	4	1006	3	7.64249	gfp-low	gfp-low	3066	1771	Infected	Batch1	AM_1
AACAAAGTCACGGACC_1	inf_1	3002	1242	211	4	984	3	16.489	gfp-low	gfp-low	2698	1241	Infected	Batch1	AM_3
AACAAAGTCTCATGGA_1	inf_1	5603	1845	282	4	1089	3	6.05033	gfp-low	gfp-low	3006	1588	Infected	Batch1	AM_3
AACAAGAAGGATTACA_1	inf_1	6133	1917	310	4	1134	3	10.6147	gfp-low	gfp-low	3000	1559	Infected	Batch1	AM_1
AACAAGACATCTGGGC_1	inf_1	2335	1133	238	4	879	3	8.69379	gfp-low	gfp-low	2371	1133	Infected	Batch1	AM_3
AACAAGATCTCATTAC_1	inf_1	3726	1449	785	4	1006	3	18.8406	gfp-low	gfp-low	2904	1436	Infected	Batch1	Macrophages/T-cells
AACAAGATCTTGAACG_1	inf_1	6404	2147	176	4	806	3	5.73079	gfp-low	gfp-low	3077	1736	Infected	Batch1	IM_3
AACACACAGCCTAGGA_1	inf_1	735	520	90	4	159	3	6.93878	gfp-low	gfp-low	1892	624	Infected	Batch1	Monocytes
AACACACCAGACGGAT_1	inf_1	3376	1429	445	4	554	3	3.93957	gfp-low	gfp-low	2834	1427	Infected	Batch1	Monocytes
AACACACTCCCGTGAG_1	inf_1	4841	1890	583	4	1139	3	18.2607	gfp-low	gfp-low	3017	1728	Infected	Batch1	AM_1
AACAGGGAGACATAAC_1	inf_1	4568	1598	275	4	927	3	26.6419	gfp-low	gfp-low	2884	1482	Infected	Batch1	AM_1
AACAGGGCACCGCTAG_1	inf_1	6092	1968	1920	4	1287	3	26.4117	gfp-low	gfp-low	3053	1601	Infected	Batch1	AM_1
AACAGGGGTCATACCA_1	inf_1	631	377	209	4	283	3	2.2187	gfp-low	gfp-low	1853	540	Infected	Batch1	Neutrophils
AACAGGGTCGTCGACG_1	inf_1	2681	981	488	4	1289	3	32.2641	gfp-low	gfp-low	2574	981	Infected	Batch1	AM_3
AACAGGGTCTGGCCGA_1	inf_1	2934	1247	323	4	1071	3	17.1097	gfp-low	gfp-low	2687	1247	Infected	Batch1	IM_2
AACCAACAGAAGTGTT_1	inf_1	3343	1342	407	4	1103	3	24.3793	gfp-low	gfp-low	2785	1342	Infected	Batch1	AM_3
AACCACAAGGCGTTAG_1	inf_1	2030	1007	208	4	543	3	11.4286	gfp-low	gfp-low	2235	1007	Infected	Batch1	AM_1
AACCACACATTGAAAG_1	inf_1	6156	2313	616	4	1204	3	7.81352	gfp-low	gfp-low	3159	1945	Infected	Batch1	AM_4
AACCACAGTCGCACAC_1	inf_1	1539	583	212	4	324	3	0.974659	gfp-low	gfp-low	2111	585	Infected	Batch1	Neutrophils
AACCACAGTGATGTAA_1	inf_1	2446	840	88	4	469	3	15.8217	gfp-low	gfp-low	2450	840	Infected	Batch1	IM_1
AACCACAGTTGTATGC_1	inf_1	10001	2837	173	4	717	3	6.74933	gfp-low	gfp-low	2645	1362	Infected	Batch1	AM_1
AACCATGGTGGATCAG_1	inf_1	2101	469	108	4	444	3	4.75964	gfp-low	gfp-low	2245	466	Infected	Batch1	Macrophages/B-cells
AACCCAATCTCGTGGG_1	inf_1	2015	1090	108	4	443	3	11.6625	gfp-low	gfp-low	2204	1090	Infected	Batch1	IM_1
AACCTGAGTCAACACT_1	inf_1	5957	1808	707	4	1307	3	14.0339	gfp-low	gfp-low	2960	1501	Infected	Batch1	AM_1
AACCTTTTCCTTTGAT_1	inf_1	2380	847	1268	4	1357	3	30.4202	gfp-low	gfp-low	2415	847	Infected	Batch1	AM_3
AACCTTTTCGATGGAG_1	inf_1	3824	1349	1195	4	1286	3	27.1444	gfp-low	gfp-low	2828	1323	Infected	Batch1	IM_2
AACGAAAAGTAAAGCT_1	inf_1	1121	552	219	4	938	3	20.785	gfp-low	gfp-low	2145	579	Infected	Batch1	AM_3
AACGAAAAGTTTCTTC_1	inf_1	1282	578	667	4	866	3	1.01404	gfp-low	gfp-low	2032	610	Infected	Batch1	Neutrophils
AACGAAAGTTAAGGGC_1	inf_1	4284	1727	274	4	850	3	9.75724	gfp-low	gfp-low	2966	1673	Infected	Batch1	AM_1
AACGAAATCATAAGGA_1	inf_1	4310	1560	208	4	728	3	5.82367	gfp-low	gfp-low	2922	1508	Infected	Batch1	IM_1
AACGAAATCTCCCTAG_1	inf_1	3119	1132	1097	4	1415	3	35.0433	gfp-low	gfp-low	2710	1131	Infected	Batch1	AM_1
AACGGGACATGCAGCC_1	inf_1	3992	1603	435	4	1428	3	23.0461	gfp-low	gfp-low	2881	1550	Infected	Batch1	AM_1
AACGGGATCCAGTGCG_1	inf_1	6281	2091	538	4	1283	3	7.67394	gfp-low	gfp-low	3047	1723	Infected	Batch1	AM_1
AACTTCTGTATACCCA_1	inf_1	5601	1693	134	4	629	3	2.66024	gfp-low	gfp-low	2974	1449	Infected	Batch1	IM_3
AACTTCTTCCATCTGC_1	inf_1	3891	1549	128	4	595	3	3.90645	gfp-low	gfp-low	2940	1529	Infected	Batch1	IM_2
AACTTCTTCTCTGCCA_1	inf_1	740	403	148	4	836	3	34.8649	gfp-low	gfp-low	2062	550	Infected	Batch1	AM_2
AAGAACACACTGGCGT_1	inf_1	3067	1086	390	4	1094	3	17.1503	gfp-low	gfp-low	2692	1085	Infected	Batch1	AM_3
AAGACAAGTCGGTGTC_1	inf_1	8131	2167	402	4	1081	3	6.93642	gfp-low	gfp-low	2863	1396	Infected	Batch1	AM_1
AAGACAATCTGTCCCA_1	inf_1	8404	2466	298	4	1126	3	10.5426	gfp-low	gfp-low	2949	1591	Infected	Batch1	AM_1
AAGACTCAGTATAGAC_1	inf_1	1154	679	125	4	642	3	3.63951	gfp-low	gfp-low	2039	712	Infected	Batch1	IM_1
AAGACTCGTCCTCCTA_1	inf_1	2677	1221	555	4	999	3	13.7467	gfp-low	gfp-low	2600	1220	Infected	Batch1	AM_3
AAGATAGCAATAGAGT_1	inf_1	2502	1118	571	4	1301	3	22.7418	gfp-low	gfp-low	2488	1116	Infected	Batch1	AM_3
AAGATAGCATCAACCA_1	inf_1	3686	1525	269	4	1143	3	14.5415	gfp-low	gfp-low	2875	1518	Infected	Batch1	AM_3
AAGCATCCAAGCGGAT_1	inf_1	8427	2604	390	4	1244	3	10.2765	gfp-low	gfp-low	2934	1630	Infected	Batch1	AM_1
AAGCATCGTCATTCCC_1	inf_1	4496	1643	101	4	278	3	3.02491	gfp-low	gfp-low	2985	1585	Infected	Batch1	Monocytes
AAGCATCTCGCCAGTG_1	inf_1	3700	1242	238	4	720	3	20.3243	gfp-low	gfp-low	2782	1227	Infected	Batch1	AM_1
AAGCGAGGTAGGACCA_1	inf_1	2037	833	220	4	588	3	20.0785	gfp-low	gfp-low	2278	832	Infected	Batch1	IM_2
AAGCGAGGTTTCGCTC_1	inf_1	6196	2068	382	4	1105	3	6.39122	gfp-low	gfp-low	3054	1715	Infected	Batch1	AM_1
AAGCGTTAGCTAATGA_1	inf_1	2356	964	512	4	1041	3	21.7742	gfp-low	gfp-low	2396	963	Infected	Batch1	AM_3
AAGCGTTCAGTCCCGA_1	inf_1	8904	2572	504	4	1069	3	10.2875	gfp-low	gfp-low	2773	1462	Infected	Batch1	AM_1
AAGCGTTGTTCGGTCG_1	inf_1	2088	966	1199	4	1279	3	14.4636	gfp-low	gfp-low	2270	966	Infected	Batch1	AM_3
AAGGAATTCTTCTCAA_1	inf_1	3555	1628	556	4	1226	3	8.07314	gfp-low	gfp-low	2894	1627	Infected	Batch1	AM_4
AAGGTAAAGCACCAGA_1	inf_1	2704	1117	111	4	376	3	11.1317	gfp-low	gfp-low	2601	1116	Infected	Batch1	IM_2
AAGGTAACAGAACTTC_1	inf_1	3732	1742	196	4	932	3	16.6667	gfp-low	gfp-low	2960	1707	Infected	Batch1	AM_1
AAGGTAAGTACTCCCT_1	inf_1	3623	1429	256	4	905	3	24.0685	gfp-low	gfp-low	2858	1420	Infected	Batch1	AM_3
AAGGTAATCTGGCCGA_1	inf_1	1087	511	1233	4	1294	3	32.5667	gfp-low	gfp-low	2162	552	Infected	Batch1	AM_4
AAGTACCGTACTAGCT_1	inf_1	541	356	524	4	1320	3	1.66359	gfp-low	gfp-low	1764	541	Infected	Batch1	Neutrophils
AAGTACCTCTGTCTCG_1	inf_1	2590	1135	164	4	702	3	17.4903	gfp-low	gfp-low	2551	1135	Infected	Batch1	IM_1
AAGTCGTCATTCTGTT_1	inf_1	1247	603	448	4	1245	3	29.4306	gfp-low	gfp-low	2141	633	Infected	Batch1	AM_2
AAGTCGTGTTAGTCGT_1	inf_1	3745	1513	893	4	1230	3	11.6956	gfp-low	gfp-low	2875	1503	Infected	Batch1	AM_1
AAGTCGTTCGCAATTG_1	inf_1	6283	2148	983	4	1328	3	10.982	gfp-low	gfp-low	3053	1742	Infected	Batch1	AM_1
AAGTGAATCTACTCAT_1	inf_1	3879	1551	502	4	1066	3	6.7801	gfp-low	gfp-low	2887	1527	Infected	Batch1	AM_3
AAGTTCGAGTACAACA_1	inf_1	9356	2377	944	4	1267	3	14.6537	gfp-low	gfp-low	2728	1258	Infected	Batch1	AM_1
AATAGAGCAAGCTGTT_1	inf_1	4938	1668	200	4	762	3	12.3127	gfp-low	gfp-low	2930	1510	Infected	Batch1	AM_3
AATCGACAGCAAACAT_1	inf_1	11080	2910	252	4	1089	3	5.58664	gfp-low	gfp-low	2566	1266	Infected	Batch1	AM_1
AATCGACTCGTCCTTG_1	inf_1	1000	638	80	4	211	3	19.5	gfp-low	gfp-low	2028	722	Infected	Batch1	DC.103+11B-
AATCGTGAGGGTCACA_1	inf_1	760	530	107	4	233	3	3.28947	gfp-low	gfp-low	1899	620	Infected	Batch1	Monocytes
AATCGTGGTCGAGATG_1	inf_1	2447	878	190	4	1360	3	38.4144	gfp-low	gfp-low	2451	877	Infected	Batch1	IM_1
AATGAAGAGACCCTTA_1	inf_1	8144	2493	864	4	1321	3	15.9136	gfp-low	gfp-low	2909	1583	Infected	Batch1	AM_1
AATGAAGAGACGTCGA_1	inf_1	15691	3346	1283	4	1325	3	5.36613	gfp-low	gfp-low	2660	1316	Infected	Batch1	AM_1
AATGAAGCAAAGGCAC_1	inf_1	1254	633	172	4	1132	3	22.4083	gfp-low	gfp-low	2109	648	Infected	Batch1	AM_3
AATGAAGCAAGGGCAT_1	inf_1	1480	607	649	4	940	3	37.5	gfp-low	gfp-low	2120	613	Infected	Batch1	IM_1
AATGAAGCACCAATTG_1	inf_1	6702	2285	91	4	510	3	7.47538	gfp-low	gfp-low	3118	1786	Infected	Batch1	AM_1
AATGAAGTCTTAATCC_1	inf_1	1365	721	25	3	211	3	1.39194	gfp-low	gfp-low	2103	723	Infected	Batch1	Monocytes
AATGACCCACAGCGCT_1	inf_1	13447	2873	115	4	451	3	3.18287	gfp-low	gfp-low	2609	1109	Infected	Batch1	IM_3
AATGACCTCATTGCGA_1	inf_1	1617	794	93	4	411	3	13.7291	gfp-low	gfp-low	2150	793	Infected	Batch1	IM_4
AATGCCAAGAGATTCA_1	inf_1	6412	2081	405	4	1041	3	10.8858	gfp-low	gfp-low	3052	1707	Infected	Batch1	AM_1
AATGCCATCGTTCCCA_1	inf_1	9335	2888	1057	4	1246	3	14.3332	gfp-low	gfp-low	2777	1534	Infected	Batch1	AM_4
AATGGAAAGCGTATAA_1	inf_1	1851	954	69	4	253	3	1.40465	gfp-low	gfp-low	2172	954	Infected	Batch1	Monocytes
AATGGAAAGTGCTCGC_1	inf_1	5327	1662	180	4	655	3	10.0807	gfp-low	gfp-low	2978	1473	Infected	Batch1	IM_2
AATGGAACAATACGCT_1	inf_1	1115	678	83	4	414	3	5.38117	gfp-low	gfp-low	2027	698	Infected	Batch1	Monocytes
AATTCCTCAGCAGATG_1	inf_1	3136	1433	167	4	1124	3	17.9528	gfp-low	gfp-low	2787	1431	Infected	Batch1	AM_1
AATTCCTGTCATTCCC_1	inf_1	912	638	50	4	241	3	6.79825	gfp-low	gfp-low	1986	754	Infected	Batch1	IM_1
AATTTCCAGAAGAGCA_1	inf_1	997	622	75	4	178	3	9.92979	gfp-low	gfp-low	2110	668	Infected	Batch1	Monocytes
AATTTCCCAAAGACTA_1	inf_1	2012	718	187	4	651	3	25.7455	gfp-low	gfp-low	2289	718	Infected	Batch1	IM_2
AATTTCCTCCTACGGG_1	inf_1	13982	3218	926	4	1251	3	7.76713	gfp-low	gfp-low	2653	1295	Infected	Batch1	AM_1
ACAAAGAGTAAGTTGA_1	inf_1	10948	2993	432	4	1290	3	6.54001	gfp-low	gfp-low	2599	1286	Infected	Batch1	AM_1
ACAAAGAGTCTCTCTG_1	inf_1	6273	2152	227	4	1139	3	7.52431	gfp-low	gfp-low	3082	1763	Infected	Batch1	Macrophages/B-cells
ACAAAGAGTTCCGCTT_1	inf_1	10526	2606	1834	4	1677	3	33.4505	gfp-low	gfp-low	2526	1062	Infected	Batch1	AM_1
ACAACCAGTACGGCAA_1	inf_1	1185	549	583	4	1218	3	29.7046	gfp-low	gfp-low	2162	572	Infected	Batch1	AM_3
ACAACCAGTCTTGTCC_1	inf_1	3373	1474	464	4	1078	3	16.3356	gfp-low	gfp-low	2836	1473	Infected	Batch1	AM_3
ACAACCAGTGTTAGCT_1	inf_1	11260	3326	562	4	1317	3	9.33393	gfp-low	gfp-low	2670	1500	Infected	Batch1	AM_4
ACAACCAGTGTTATCG_1	inf_1	3557	1357	319	4	652	3	9.83975	gfp-low	gfp-low	2828	1357	Infected	Batch1	IM_1
ACAAGCTAGGCTCAAG_1	inf_1	2557	971	623	4	963	3	37.7395	gfp-low	gfp-low	2518	971	Infected	Batch1	AM_1
ACAAGCTAGTTTCGAC_1	inf_1	6907	2155	459	4	1491	3	24.1494	gfp-low	gfp-low	3030	1624	Infected	Batch1	AM_1
ACAAGCTGTAGTCACT_1	inf_1	5931	2271	139	4	813	3	12.1059	gfp-low	gfp-low	3177	1960	Infected	Batch1	AM_4
ACACCAAAGCGGGTTA_1	inf_1	2325	970	475	4	1155	3	29.3763	gfp-low	gfp-low	2380	970	Infected	Batch1	AM_2
ACACCAACAAGGCTTT_1	inf_1	3440	1281	90	4	372	3	3.80814	gfp-low	gfp-low	2814	1279	Infected	Batch1	Monocytes
ACACCAACAAGTGACG_1	inf_1	3354	1385	199	4	1057	3	19.1413	gfp-low	gfp-low	2843	1384	Infected	Batch1	AM_1
ACACCAAGTATGCTAC_1	inf_1	7496	2191	1310	4	1361	3	15.3015	gfp-low	gfp-low	2906	1488	Infected	Batch1	AM_1
ACACCAAGTCCAGTTA_1	inf_1	8158	2697	723	4	1287	3	4.36381	gfp-low	gfp-low	3059	1831	Infected	Batch1	AM_4
ACACCAAGTGGCCTCA_1	inf_1	9222	2507	448	4	1099	3	11.234	gfp-low	gfp-low	2741	1345	Infected	Batch1	AM_1
ACACCAATCGCACGAC_1	inf_1	3927	1812	203	4	731	3	17.8762	gfp-low	gfp-low	3006	1761	Infected	Batch1	AM_1
ACACCAATCTCTGAGA_1	inf_1	7748	2439	272	4	274	3	2.25865	gfp-low	gfp-low	3113	1712	Infected	Batch1	IM_2
ACACCAATCTGGCCAG_1	inf_1	11485	2913	652	4	1278	3	8.05398	gfp-low	gfp-low	2708	1293	Infected	Batch1	AM_4
ACACGCGAGACTACGG_1	inf_1	4045	1473	156	4	719	3	8.75155	gfp-low	gfp-low	2891	1440	Infected	Batch1	IM_2
ACACGCGGTTCGATTG_1	inf_1	3724	1172	410	4	1067	3	36.0634	gfp-low	gfp-low	2834	1132	Infected	Batch1	IM_1
ACACTGAAGACTAAGT_1	inf_1	1150	664	85	4	184	3	4.43478	gfp-low	gfp-low	2059	675	Infected	Batch1	Monocytes
ACACTGATCTTACCGC_1	inf_1	3598	1712	195	4	427	3	8.67148	gfp-low	gfp-low	2945	1707	Infected	Batch1	IM_1
ACAGAAACATACAGAA_1	inf_1	1091	722	107	4	257	3	7.97434	gfp-low	gfp-low	2007	761	Infected	Batch1	Monocytes
ACAGCCGGTCATGCAT_1	inf_1	918	502	394	4	503	3	2.28758	gfp-low	gfp-low	2034	601	Infected	Batch1	Neutrophils
ACAGCCGGTTAAGTCC_1	inf_1	2691	980	1005	4	1169	3	35.9718	gfp-low	gfp-low	2578	979	Infected	Batch1	AM_3
ACAGGGACATCGAACT_1	inf_1	7927	2713	320	4	1147	3	14.6714	gfp-low	gfp-low	3108	1871	Infected	Batch1	AM_1
ACAGGGAGTGACCGTC_1	inf_1	7533	2326	572	4	1249	3	4.96482	gfp-low	gfp-low	3038	1683	Infected	Batch1	AM_1
ACATCCCCAGTCAGAG_1	inf_1	6131	2028	157	4	560	3	13.2768	gfp-low	gfp-low	3022	1658	Infected	Batch1	AM_1
ACATGCAAGTAGGTTA_1	inf_1	5562	2026	192	4	916	3	8.37828	gfp-low	gfp-low	3099	1798	Infected	Batch1	AM_1
ACATTTCAGTCTAACC_1	inf_1	1235	594	376	4	1161	3	26.8016	gfp-low	gfp-low	2156	611	Infected	Batch1	AM_3
ACATTTCTCGACATCA_1	inf_1	9395	2743	196	4	1141	3	8.57903	gfp-low	gfp-low	2849	1507	Infected	Batch1	AM_4
ACATTTCTCTGCCTCA_1	inf_1	4029	1566	373	4	983	3	25.937	gfp-low	gfp-low	2907	1513	Infected	Batch1	AM_1
ACCAAACCACCTCTGT_1	inf_1	8948	2630	684	4	1229	3	9.15288	gfp-low	gfp-low	2815	1502	Infected	Batch1	AM_1
ACCAACAAGTGCACAG_1	inf_1	699	539	99	4	249	3	5.86552	gfp-low	gfp-low	1814	665	Infected	Batch1	Monocytes
ACCATTTCATGCACTA_1	inf_1	1255	761	296	4	225	3	0.956175	gfp-low	gfp-low	2012	777	Infected	Batch1	Neutrophils
ACCCAAAGTCTTCGAA_1	inf_1	6694	2096	267	4	1072	3	6.60293	gfp-low	gfp-low	3033	1642	Infected	Batch1	AM_1
ACCCTCAAGCTAAGTA_1	inf_1	12079	2824	424	4	971	3	6.51544	gfp-low	gfp-low	2587	1171	Infected	Batch1	AM_1
ACCCTCAAGTCGGCCT_1	inf_1	8104	2445	285	4	845	3	7.61352	gfp-low	gfp-low	2951	1630	Infected	Batch1	AM_1
ACCCTCAGTGAGCGAT_1	inf_1	3145	1647	401	4	779	3	5.15103	gfp-low	gfp-low	2834	1645	Infected	Batch1	AM_4
ACCCTTGCACAACCGC_1	inf_1	2963	1098	146	4	395	3	12.5886	gfp-low	gfp-low	2675	1097	Infected	Batch1	IM_1
ACCCTTGGTAGATCCT_1	inf_1	4762	1631	493	4	915	3	17.9126	gfp-low	gfp-low	2913	1493	Infected	Batch1	AM_1
ACCCTTGTCAGACATC_1	inf_1	992	595	263	4	159	3	1.00806	gfp-low	gfp-low	2046	678	Infected	Batch1	Neutrophils
ACCGTTCAGATCGCCC_1	inf_1	1404	569	626	4	801	3	29.5584	gfp-low	gfp-low	2171	570	Infected	Batch1	Neutrophils
ACCGTTCCAGGTTACT_1	inf_1	7999	2330	163	4	811	3	9.90124	gfp-low	gfp-low	2922	1503	Infected	Batch1	IM_3
ACCGTTCCAGGTTTAC_1	inf_1	6584	1973	188	4	812	3	8.64216	gfp-low	gfp-low	3006	1513	Infected	Batch1	IM_2
ACCTACCAGCACCAGA_1	inf_1	506	389	85	4	169	3	7.11462	gfp-low	gfp-low	1627	621	Infected	Batch1	Monocytes
ACCTACCGTCAGGAGT_1	inf_1	8464	2558	195	4	1020	3	3.96975	gfp-low	gfp-low	2936	1601	Infected	Batch1	AM_1
ACCTACCGTGGTTCTA_1	inf_1	1712	843	710	4	1350	3	18.8668	gfp-low	gfp-low	2184	842	Infected	Batch1	AM_3
ACCTACCTCCGTTGGG_1	inf_1	8593	2792	566	4	1449	3	10.2758	gfp-low	gfp-low	2954	1699	Infected	Batch1	Macrophages/T-cells
ACCTGAAAGAATCGCG_1	inf_1	1721	856	192	4	749	3	23.9396	gfp-low	gfp-low	2162	856	Infected	Batch1	AM_3
ACCTGAACAAGTGCTT_1	inf_1	1903	869	1096	4	1367	3	17.3936	gfp-low	gfp-low	2224	868	Infected	Batch1	AM_3
ACCTGAACATGTGGCC_1	inf_1	6638	2053	365	4	1187	3	7.00512	gfp-low	gfp-low	3055	1621	Infected	Batch1	AM_1
ACCTGTCGTGAGGAAA_1	inf_1	1932	884	145	4	729	3	7.45342	gfp-low	gfp-low	2236	884	Infected	Batch1	IM_2
ACCTGTCTCTGGGTCG_1	inf_1	3977	1554	1062	4	1656	3	25.2452	gfp-low	gfp-low	2898	1513	Infected	Batch1	AM_1
ACGATCAAGGAGAGGC_1	inf_1	1155	594	175	4	610	3	20.9524	gfp-low	gfp-low	2054	634	Infected	Batch1	IM_1
ACGATCACAGAGTTCT_1	inf_1	3550	1339	438	4	1119	3	18.8451	gfp-low	gfp-low	2828	1339	Infected	Batch1	IM_2
ACGATGTGTTGTCCCT_1	inf_1	793	475	280	4	732	3	14.5019	gfp-low	gfp-low	2046	564	Infected	Batch1	AM_3
ACGGGTCGTGTTAGCT_1	inf_1	2494	992	840	4	1246	3	21.3713	gfp-low	gfp-low	2484	991	Infected	Batch1	AM_3
ACGGTCGAGATAACAC_1	inf_1	1922	877	350	4	933	3	27.7315	gfp-low	gfp-low	2226	877	Infected	Batch1	AM_2
ACGGTTACATCCCGTT_1	inf_1	12909	3458	1275	4	1814	3	12.6501	gfp-low	gfp-low	2706	1522	Infected	Batch1	IM_2
ACGGTTATCACATCAG_1	inf_1	6067	2089	214	4	1073	3	9.14785	gfp-low	gfp-low	3031	1728	Infected	Batch1	AM_1
ACGTAACAGCACTTTG_1	inf_1	5226	1913	76	4	438	3	2.43016	gfp-low	gfp-low	3111	1735	Infected	Batch1	DC.103+11B-
ACGTAACCACACCGAC_1	inf_1	3164	1315	196	4	1111	3	28.7927	gfp-low	gfp-low	2778	1314	Infected	Batch1	AM_1
ACGTAACGTTCCCAAA_1	inf_1	11485	3089	780	4	1369	3	11.8502	gfp-low	gfp-low	2605	1338	Infected	Batch1	AM_4
ACGTACACAAGGTCTT_1	inf_1	845	423	69	3	290	3	23.6686	gfp-low	gfp-low	2055	514	Infected	Batch1	IM_1
ACGTACATCGATCCAA_1	inf_1	6145	2065	266	4	1259	3	11.1147	gfp-low	gfp-low	3053	1733	Infected	Batch1	AM_1
ACGTAGTAGAAGCTGC_1	inf_1	1263	602	312	4	1035	3	31.0372	gfp-low	gfp-low	2134	623	Infected	Batch1	AM_2
ACGTAGTAGGTCGTGA_1	inf_1	5728	2098	278	4	1106	3	8.50209	gfp-low	gfp-low	3146	1844	Infected	Batch1	AM_1
ACGTAGTCAGACCGCT_1	inf_1	2044	1077	157	4	827	3	16.1448	gfp-low	gfp-low	2207	1077	Infected	Batch1	IM_1
ACGTAGTGTAGCGAGT_1	inf_1	1511	748	51	4	186	3	22.8326	gfp-low	gfp-low	2120	748	Infected	Batch1	IM_2
ACGTAGTTCGCTCATC_1	inf_1	644	389	401	4	454	3	1.70807	gfp-low	gfp-low	1815	550	Infected	Batch1	Neutrophils
ACGTTCCCACAACGAG_1	inf_1	6669	2699	556	4	972	3	11.6509	gfp-low	gfp-low	3279	2184	Infected	Batch1	Macrophages/T-cells
ACTACGAAGGCGTTGA_1	inf_1	4964	1882	579	4	1022	3	8.86382	gfp-low	gfp-low	3039	1731	Infected	Batch1	AM_1
ACTACGAAGTATAACG_1	inf_1	1084	500	735	4	1366	3	37.3616	gfp-low	gfp-low	2181	556	Infected	Batch1	AM_3
ACTATCTAGGTCACTT_1	inf_1	4061	1536	538	4	1046	3	19.281	gfp-low	gfp-low	2889	1490	Infected	Batch1	AM_1
ACTATCTAGGTCGAGT_1	inf_1	831	484	153	4	177	3	20.0963	gfp-low	gfp-low	2021	584	Infected	Batch1	IM_1
ACTATCTTCTGGCTGG_1	inf_1	2527	1212	339	4	1180	3	17.1349	gfp-low	gfp-low	2511	1212	Infected	Batch1	AM_1
ACTATGGGTCTCACAA_1	inf_1	4091	1471	281	4	1202	3	9.802	gfp-low	gfp-low	2878	1435	Infected	Batch1	AM_1
ACTATGGGTGGATACG_1	inf_1	11291	2733	820	4	1351	3	12.0981	gfp-low	gfp-low	2475	1086	Infected	Batch1	AM_1
ACTATTCCACGAGGAT_1	inf_1	641	415	77	4	358	3	20.1248	gfp-low	gfp-low	1857	576	Infected	Batch1	Monocytes
ACTATTCTCTTCGTGC_1	inf_1	9143	2925	797	4	1394	3	12.0311	gfp-low	gfp-low	2822	1596	Infected	Batch1	AM_1
ACTCCCACAGAGGGTT_1	inf_1	944	558	178	4	341	3	22.1398	gfp-low	gfp-low	2112	628	Infected	Batch1	Monocytes
ACTCCCACATTGGCAT_1	inf_1	2418	1269	388	4	975	3	14.6402	gfp-low	gfp-low	2427	1269	Infected	Batch1	AM_1
ACTCTCGAGATACAGT_1	inf_1	4318	1498	199	4	912	3	18.4113	gfp-low	gfp-low	2921	1427	Infected	Batch1	IM_2
ACTCTCGAGTGCAACG_1	inf_1	8921	2746	237	4	834	3	4.85372	gfp-low	gfp-low	2817	1537	Infected	Batch1	AM_1
ACTCTCGGTGTTCGTA_1	inf_1	948	494	282	4	859	3	24.4726	gfp-low	gfp-low	2173	564	Infected	Batch1	AM_2
ACTGATGAGTCGCTAT_1	inf_1	2160	1074	91	4	340	3	4.16667	gfp-low	gfp-low	2284	1073	Infected	Batch1	Monocytes
ACTGATGCACGACTAT_1	inf_1	1288	628	216	4	764	3	25.3882	gfp-low	gfp-low	2011	658	Infected	Batch1	IM_1
ACTGATGCACGCTATA_1	inf_1	9270	2484	208	4	753	3	5.69579	gfp-low	gfp-low	2729	1309	Infected	Batch1	AM_1
ACTGATGGTACTGGGA_1	inf_1	887	441	236	4	308	3	1.1274	gfp-low	gfp-low	2040	539	Infected	Batch1	Neutrophils
ACTGATGGTCAACACT_1	inf_1	4574	1830	871	4	1409	3	12.3524	gfp-low	gfp-low	3001	1731	Infected	Batch1	AM_1
ACTGCAAGTAAGATCA_1	inf_1	9436	2503	1027	4	1385	3	5.90292	gfp-low	gfp-low	2717	1284	Infected	Batch1	AM_1
ACTGTCCTCGTTCAGA_1	inf_1	1962	788	857	4	1243	3	33.4353	gfp-low	gfp-low	2270	787	Infected	Batch1	AM_2
ACTGTGAAGCTGGTGA_1	inf_1	3570	1285	507	4	1411	3	34.4818	gfp-low	gfp-low	2813	1281	Infected	Batch1	AM_1
ACTGTGACAATTGTGC_1	inf_1	1998	997	1118	4	1080	3	12.2122	gfp-low	gfp-low	2207	995	Infected	Batch1	Neutrophils
ACTTAGGAGGAGGTTC_1	inf_1	4316	1468	635	4	1135	3	15.6163	gfp-low	gfp-low	2864	1410	Infected	Batch1	AM_3
ACTTAGGGTATTGGCT_1	inf_1	3906	1609	298	4	979	3	15.0026	gfp-low	gfp-low	2946	1576	Infected	Batch1	AM_4
ACTTAGGTCGAGAAAT_1	inf_1	3528	1230	459	4	1028	3	31.1508	gfp-low	gfp-low	2784	1228	Infected	Batch1	AM_4
ACTTAGGTCGCCAACG_1	inf_1	2533	1156	179	4	909	3	22.3056	gfp-low	gfp-low	2512	1156	Infected	Batch1	AM_3
ACTTATCCATAGTCGT_1	inf_1	1701	973	89	4	201	3	9.52381	gfp-low	gfp-low	2095	973	Infected	Batch1	Monocytes
ACTTCCGCAAATGAGT_1	inf_1	653	469	79	4	238	3	9.18836	gfp-low	gfp-low	1836	602	Infected	Batch1	Monocytes
ACTTCGCTCCGCTGTT_1	inf_1	3426	1384	446	4	1220	3	19.2644	gfp-low	gfp-low	2831	1383	Infected	Batch1	IM_1
ACTTCGCTCTGACCCT_1	inf_1	2350	1200	193	4	999	3	10.383	gfp-low	gfp-low	2376	1199	Infected	Batch1	AM_1
ACTTTCACAAGTCCAT_1	inf_1	1139	576	104	4	499	3	19.4908	gfp-low	gfp-low	2105	601	Infected	Batch1	IM_4
ACTTTCACATTGAGGG_1	inf_1	719	348	199	3	170	3	0.834492	gfp-low	gfp-low	1935	490	Infected	Batch1	Neutrophils
ACTTTGTGTCTGTGAT_1	inf_1	10095	2671	564	4	1231	3	6.01288	gfp-low	gfp-low	2575	1236	Infected	Batch1	AM_1
AGAAATGCAAATGGTA_1	inf_1	14614	3359	1108	4	1257	3	8.26605	gfp-low	gfp-low	2636	1345	Infected	Batch1	AM_1
AGAAATGCAGGTGTGA_1	inf_1	16212	3344	507	4	1259	3	5.18135	gfp-low	gfp-low	2618	1213	Infected	Batch1	IM_3
AGAACAATCAAGGTGG_1	inf_1	5026	1489	144	4	939	3	12.9924	gfp-low	gfp-low	2926	1334	Infected	Batch1	IM_3
AGAACAATCGGTTAGT_1	inf_1	5466	1843	923	4	1452	3	15.6422	gfp-low	gfp-low	3052	1645	Infected	Batch1	AM_1
AGAACCTTCTCGACGG_1	inf_1	1374	542	900	4	1073	3	26.492	gfp-low	gfp-low	2140	554	Infected	Batch1	Neutrophils
AGAAGCGCAGCACAAG_1	inf_1	1642	628	645	4	1374	3	38.5505	gfp-low	gfp-low	2227	628	Infected	Batch1	AM_3
AGAAGCGGTAGCTTGT_1	inf_1	9852	2534	127	4	552	3	5.85668	gfp-low	gfp-low	2664	1214	Infected	Batch1	IM_3
AGAAGTACAAGAGGCT_1	inf_1	6760	1960	323	4	1074	3	6.89349	gfp-low	gfp-low	2964	1516	Infected	Batch1	AM_1
AGAAGTACAGCGTTGC_1	inf_1	2744	1199	151	4	499	3	5.90379	gfp-low	gfp-low	2619	1197	Infected	Batch1	IM_2
AGAAGTATCTTACCAT_1	inf_1	3372	1224	1076	4	1232	3	19.7212	gfp-low	gfp-low	2752	1223	Infected	Batch1	AM_3
AGACAAACATGGACAG_1	inf_1	764	421	159	4	278	3	1.83246	gfp-low	gfp-low	1875	553	Infected	Batch1	Neutrophils
AGACAAAGTTCTTGCC_1	inf_1	2284	1060	327	4	1066	3	14.711	gfp-low	gfp-low	2345	1060	Infected	Batch1	AM_1
AGACACTAGTAGGATT_1	inf_1	10916	2790	892	4	1063	3	8.41883	gfp-low	gfp-low	2561	1173	Infected	Batch1	AM_1
AGACAGGCAAGTGGAC_1	inf_1	10019	2288	359	4	1031	3	10.3404	gfp-low	gfp-low	2613	1094	Infected	Batch1	AM_1
AGACCATTCGGCTCTT_1	inf_1	1773	864	178	4	684	3	24.9859	gfp-low	gfp-low	2164	862	Infected	Batch1	IM_1
AGACCATTCTGGGAGA_1	inf_1	2610	1054	826	4	1385	3	21.5709	gfp-low	gfp-low	2552	1054	Infected	Batch1	AM_3
AGACCCGAGTTCCAGT_1	inf_1	4054	1561	305	4	1119	3	29.9951	gfp-low	gfp-low	2908	1505	Infected	Batch1	AM_4
AGACCCGGTCCTCATC_1	inf_1	4791	1811	853	4	1135	3	15.6961	gfp-low	gfp-low	2988	1679	Infected	Batch1	AM_4
AGACTCAAGCCTCCAG_1	inf_1	2995	1290	524	4	1230	3	20.8681	gfp-low	gfp-low	2716	1290	Infected	Batch1	AM_2
AGACTCACACGCGTCA_1	inf_1	4221	1470	236	4	1112	3	26.6761	gfp-low	gfp-low	2858	1389	Infected	Batch1	AM_3
AGACTCACAGATTCGT_1	inf_1	7656	2287	238	4	936	3	5.31609	gfp-low	gfp-low	2974	1627	Infected	Batch1	AM_1
AGACTCATCACTGCTC_1	inf_1	5168	1898	233	4	700	3	8.37848	gfp-low	gfp-low	3036	1720	Infected	Batch1	AM_1
AGAGAATGTGGATTTC_1	inf_1	844	437	488	4	557	3	1.89573	gfp-low	gfp-low	1971	558	Infected	Batch1	Neutrophils
AGAGAATGTGTTACTG_1	inf_1	1469	688	50	4	241	3	9.80259	gfp-low	gfp-low	2160	688	Infected	Batch1	AM_3
AGAGAATGTTAGGCTT_1	inf_1	1918	848	118	4	476	3	26.0167	gfp-low	gfp-low	2239	844	Infected	Batch1	AM_3
AGAGAATGTTGTTGAC_1	inf_1	1566	900	83	4	531	3	6.70498	gfp-low	gfp-low	2075	900	Infected	Batch1	Monocytes
AGAGAATTCAGGTGTT_1	inf_1	10494	2460	145	4	972	3	9.46255	gfp-low	gfp-low	2578	1013	Infected	Batch1	AM_1
AGAGAGCAGCCAAGTG_1	inf_1	663	328	391	4	304	3	1.05581	gfp-low	gfp-low	1863	489	Infected	Batch1	Neutrophils
AGAGAGCTCTAAGCGT_1	inf_1	9751	2468	255	4	699	3	9.13752	gfp-low	gfp-low	2570	1130	Infected	Batch1	AM_1
AGAGCAGAGATACGAT_1	inf_1	6609	1786	436	4	1189	3	15.0098	gfp-low	gfp-low	2849	1323	Infected	Batch1	AM_3
AGAGCAGCAGGACATG_1	inf_1	1823	783	290	4	1123	3	17.0049	gfp-low	gfp-low	2219	782	Infected	Batch1	AM_3
AGAGCAGGTATGGGAC_1	inf_1	765	499	117	4	339	3	7.71242	gfp-low	gfp-low	1927	608	Infected	Batch1	Monocytes
AGAGCAGGTCGCCACA_1	inf_1	1443	749	268	4	257	3	0.554401	gfp-low	gfp-low	2046	752	Infected	Batch1	IM_4
AGAGCAGTCAGACCGC_1	inf_1	1245	724	105	4	365	3	8.11245	gfp-low	gfp-low	2036	733	Infected	Batch1	Monocytes
AGAGCAGTCTGTAACG_1	inf_1	4681	1767	194	4	813	3	9.52788	gfp-low	gfp-low	2966	1649	Infected	Batch1	AM_1
AGATAGAAGCCTCCAG_1	inf_1	3596	1404	480	4	1207	3	23.1368	gfp-low	gfp-low	2826	1397	Infected	Batch1	AM_1
AGATAGACAAACGAGC_1	inf_1	5269	1722	206	4	921	3	9.29968	gfp-low	gfp-low	2939	1547	Infected	Batch1	AM_3
AGATCCAAGGCCTTGC_1	inf_1	5593	1940	1512	4	1319	3	17.7722	gfp-low	gfp-low	3053	1693	Infected	Batch1	AM_1
AGATCCATCAATCCGA_1	inf_1	1934	981	220	4	1165	3	15.7704	gfp-low	gfp-low	2213	980	Infected	Batch1	AM_3
AGATCGTAGCAGGCTA_1	inf_1	5477	2045	410	4	1110	3	7.32153	gfp-low	gfp-low	3106	1836	Infected	Batch1	AM_1
AGATCGTCAATTGAGA_1	inf_1	4026	1386	300	4	924	3	12.0467	gfp-low	gfp-low	2835	1354	Infected	Batch1	AM_1
AGATCGTTCAACCCGG_1	inf_1	5700	2073	887	4	1382	3	10.1228	gfp-low	gfp-low	3121	1826	Infected	Batch1	AM_1
AGATGAAAGTAGAATC_1	inf_1	9259	2686	271	4	934	3	5.68096	gfp-low	gfp-low	2765	1448	Infected	Batch1	AM_1
AGATGAATCTCCTACG_1	inf_1	8050	2800	1159	4	1293	3	14.0248	gfp-low	gfp-low	3139	1918	Infected	Batch1	AM_4
AGATGAATCTCTCCGA_1	inf_1	2916	1281	118	4	427	3	8.57339	gfp-low	gfp-low	2692	1280	Infected	Batch1	AM_3
AGATGCTAGTATGAAC_1	inf_1	3747	1511	86	4	212	3	3.57619	gfp-low	gfp-low	2901	1498	Infected	Batch1	IM_2
AGATGCTAGTATTCCG_1	inf_1	6410	1943	484	4	838	3	4.24337	gfp-low	gfp-low	2962	1520	Infected	Batch1	IM_3
AGATGCTGTTCAGGTT_1	inf_1	7046	2066	387	4	1160	3	9.48056	gfp-low	gfp-low	2931	1501	Infected	Batch1	AM_1
AGATGCTGTTGGGTAG_1	inf_1	1759	979	100	4	261	3	6.02615	gfp-low	gfp-low	2122	978	Infected	Batch1	Monocytes
AGATGCTTCAAGGCTT_1	inf_1	1244	591	1046	4	1210	3	18.4887	gfp-low	gfp-low	2159	604	Infected	Batch1	AM_3
AGCATCAGTAGGTACG_1	inf_1	1839	893	731	4	1212	3	26.0468	gfp-low	gfp-low	2190	891	Infected	Batch1	AM_4
AGCATCAGTGCTTCAA_1	inf_1	7582	2398	171	4	763	3	2.0575	gfp-low	gfp-low	3004	1706	Infected	Batch1	AM_1
AGCATCATCCGATCGG_1	inf_1	4362	1663	145	4	575	3	11.2792	gfp-low	gfp-low	2941	1614	Infected	Batch1	AM_1
AGCATCATCGAGTGGA_1	inf_1	1910	901	530	4	433	3	4.55497	gfp-low	gfp-low	2213	901	Infected	Batch1	IM_2
AGCATCATCGTAGTGT_1	inf_1	9035	2289	444	4	943	3	13.4588	gfp-low	gfp-low	2690	1193	Infected	Batch1	AM_1
AGCCAATAGGTCACCC_1	inf_1	5925	2046	164	4	785	3	12.4051	gfp-low	gfp-low	3062	1747	Infected	Batch1	AM_1
AGCCAATCAATACCTG_1	inf_1	2322	1120	164	4	705	3	25.1077	gfp-low	gfp-low	2370	1120	Infected	Batch1	AM_1
AGCCAATGTCGATGCC_1	inf_1	3600	1424	246	4	1328	3	23.1667	gfp-low	gfp-low	2840	1415	Infected	Batch1	AM_4
AGCCAATGTGGGACAT_1	inf_1	880	411	343	4	228	3	1.02273	gfp-low	gfp-low	2031	521	Infected	Batch1	Neutrophils
AGCCAATTCTATCGGA_1	inf_1	4386	1457	305	4	1092	3	12.8135	gfp-low	gfp-low	2873	1375	Infected	Batch1	AM_3
AGCCACGTCCCGTTCA_1	inf_1	932	531	297	4	318	3	1.39485	gfp-low	gfp-low	2011	628	Infected	Batch1	Neutrophils
AGCCACGTCTCACTCG_1	inf_1	1192	708	78	4	174	3	0.671141	gfp-low	gfp-low	2066	726	Infected	Batch1	AM_4
AGCCAGCAGCCTCGTG_1	inf_1	2387	932	221	4	826	3	18.3913	gfp-low	gfp-low	2408	931	Infected	Batch1	IM_2
AGCCAGCAGGGATGTC_1	inf_1	4430	1634	181	4	597	3	6.00451	gfp-low	gfp-low	2906	1560	Infected	Batch1	AM_3
AGCCAGCCAGCACAGA_1	inf_1	12303	3050	410	4	964	3	5.55962	gfp-low	gfp-low	2623	1302	Infected	Batch1	AM_1
AGCCAGCTCACCTGTC_1	inf_1	5156	1948	242	4	922	3	13.3243	gfp-low	gfp-low	3038	1752	Infected	Batch1	IM_3
AGCCAGCTCGGCTCTT_1	inf_1	9844	2973	899	4	1218	3	11.9667	gfp-low	gfp-low	2716	1485	Infected	Batch1	AM_4
AGCCAGCTCTTAGCCC_1	inf_1	1320	724	210	4	1085	3	20.1515	gfp-low	gfp-low	2050	742	Infected	Batch1	AM_1
AGCGATTAGCATCAAA_1	inf_1	5880	2067	74	4	259	3	3.36735	gfp-low	gfp-low	3076	1749	Infected	Batch1	IM_2
AGCGATTAGTCCCGAC_1	inf_1	500	298	250	4	301	3	2.8	gfp-low	gfp-low	1795	502	Infected	Batch1	Neutrophils
AGCGATTCAGGCGTTC_1	inf_1	879	489	237	4	957	3	26.6212	gfp-low	gfp-low	2131	570	Infected	Batch1	AM_2
AGCGATTGTAACAAGT_1	inf_1	1274	512	609	4	352	3	1.17739	gfp-low	gfp-low	2096	547	Infected	Batch1	Neutrophils
AGCGATTTCTGGAAGG_1	inf_1	12560	2925	445	4	1058	3	7.08599	gfp-low	gfp-low	2585	1140	Infected	Batch1	AM_1
AGCGCCAAGCGCATCC_1	inf_1	504	326	304	4	316	3	2.38095	gfp-low	gfp-low	1674	539	Infected	Batch1	Neutrophils
AGCGCCACAACTCGTA_1	inf_1	3734	1332	237	4	1225	3	16.7916	gfp-low	gfp-low	2814	1317	Infected	Batch1	AM_1
AGCGCCACAGGTCAAG_1	inf_1	13051	3202	490	4	1298	3	3.78515	gfp-low	gfp-low	2566	1215	Infected	Batch1	AM_1
AGCGCCACATGACGGA_1	inf_1	515	318	85	4	329	3	26.4078	gfp-low	gfp-low	1904	522	Infected	Batch1	Monocytes
AGCGCCATCAATCCAG_1	inf_1	3409	1353	134	4	480	3	17.3951	gfp-low	gfp-low	2798	1352	Infected	Batch1	IM_2
AGCGCCATCTCACCCA_1	inf_1	4633	1638	438	4	1195	3	11.1807	gfp-low	gfp-low	2923	1547	Infected	Batch1	AM_3
AGCGCCATCTTCCCGA_1	inf_1	1214	613	220	4	1072	3	33.6903	gfp-low	gfp-low	2105	650	Infected	Batch1	AM_3
AGCGCTGGTTCCACAA_1	inf_1	8911	2356	239	4	1225	3	8.56245	gfp-low	gfp-low	2679	1259	Infected	Batch1	AM_1
AGCGTATTCCACAGCG_1	inf_1	1035	501	1040	4	1152	3	19.9034	gfp-low	gfp-low	2193	548	Infected	Batch1	AM_3
AGCGTCGCACGAGGTA_1	inf_1	9294	2436	240	4	762	3	8.7691	gfp-low	gfp-low	2649	1228	Infected	Batch1	AM_1
AGCTCAAAGCGAACTG_1	inf_1	4596	1551	1089	4	1377	3	24.1732	gfp-low	gfp-low	2875	1438	Infected	Batch1	AM_3
AGCTCAACAACAGATA_1	inf_1	2222	1122	233	4	1077	3	18.9919	gfp-low	gfp-low	2302	1121	Infected	Batch1	AM_1
AGCTCAATCTTCACAT_1	inf_1	8623	2556	535	4	1345	3	12.2463	gfp-low	gfp-low	2827	1486	Infected	Batch1	AM_1
AGCTTCCTCGTAGCTA_1	inf_1	2377	1013	855	4	1236	3	34.8759	gfp-low	gfp-low	2406	1010	Infected	Batch1	AM_2
AGGAAATAGAGCTGAC_1	inf_1	8685	2552	688	4	1288	3	10.0173	gfp-low	gfp-low	2800	1470	Infected	Batch1	AM_1
AGGAAATAGATACAGT_1	inf_1	15007	3133	210	4	1006	3	4.95769	gfp-low	gfp-low	2584	1193	Infected	Batch1	AM_1
AGGAAATGTATGGGAC_1	inf_1	2112	1023	118	4	402	3	6.96023	gfp-low	gfp-low	2241	1021	Infected	Batch1	IM_2
AGGAAATGTCAAAGCG_1	inf_1	1685	886	387	4	1121	3	11.5727	gfp-low	gfp-low	2151	886	Infected	Batch1	AM_1
AGGAAATTCGGTTGTA_1	inf_1	7431	2263	539	4	1293	3	23.0386	gfp-low	gfp-low	2995	1598	Infected	Batch1	AM_1
AGGAAATTCTTAGCCC_1	inf_1	13209	3118	1220	4	1208	3	5.90506	gfp-low	gfp-low	2603	1236	Infected	Batch1	AM_1
AGGAATAAGGTGGTTG_1	inf_1	1192	752	84	4	219	3	11.4094	gfp-low	gfp-low	1982	770	Infected	Batch1	Monocytes
AGGAATAGTTCCCACT_1	inf_1	1150	671	89	4	419	3	9.47826	gfp-low	gfp-low	2040	701	Infected	Batch1	IM_1
AGGACGAAGCGGGTTA_1	inf_1	7874	2118	194	4	395	3	9.10592	gfp-low	gfp-low	2908	1415	Infected	Batch1	IM_3
AGGACGATCTCGCGTT_1	inf_1	2062	938	87	4	419	3	3.24927	gfp-low	gfp-low	2257	938	Infected	Batch1	Monocytes
AGGATCTCACCCTTAC_1	inf_1	3524	1528	307	4	1225	3	16.4869	gfp-low	gfp-low	2868	1527	Infected	Batch1	Macrophages/T-cells
AGGATCTTCGGTCGAC_1	inf_1	1362	702	642	4	737	3	1.17474	gfp-low	gfp-low	2016	713	Infected	Batch1	Neutrophils
AGGCATTCAAAGTATG_1	inf_1	12821	3040	1034	4	1240	3	6.05257	gfp-low	gfp-low	2582	1171	Infected	Batch1	Macrophages/B-cells
AGGCATTGTCACTACA_1	inf_1	4425	1643	162	4	896	3	6.73446	gfp-low	gfp-low	2930	1575	Infected	Batch1	IM_2
AGGCCACCAAGATGGC_1	inf_1	7857	2527	303	4	1122	3	5.3201	gfp-low	gfp-low	3053	1760	Infected	Batch1	AM_1
AGGCCACCAGAGGACT_1	inf_1	10195	2897	611	4	1343	3	8.45513	gfp-low	gfp-low	2657	1369	Infected	Batch1	AM_1
AGGCTGCCACGCTGAC_1	inf_1	5110	2083	346	4	1235	3	11.135	gfp-low	gfp-low	3092	1887	Infected	Batch1	AM_1
AGGCTGCGTAGCCCTG_1	inf_1	1492	729	187	4	920	3	17.4263	gfp-low	gfp-low	2089	729	Infected	Batch1	IM_1
AGGGAGTGTACGGGAT_1	inf_1	1125	658	484	4	554	3	1.6	gfp-low	gfp-low	1997	710	Infected	Batch1	Neutrophils
AGGGAGTGTGTCCACG_1	inf_1	7287	2067	261	4	1096	3	12.8036	gfp-low	gfp-low	2929	1471	Infected	Batch1	AM_1
AGGGCCTCACGCGTCA_1	inf_1	1360	816	95	4	211	3	9.92647	gfp-low	gfp-low	2025	817	Infected	Batch1	Monocytes
AGGGCCTCATCTAGAC_1	inf_1	966	509	88	4	357	3	19.9793	gfp-low	gfp-low	2167	589	Infected	Batch1	IM_4
AGGGCCTGTCAGGCAA_1	inf_1	4845	1807	758	4	949	3	19.2157	gfp-low	gfp-low	2991	1646	Infected	Batch1	IM_3
AGGGCTCAGCAACAAT_1	inf_1	7692	2555	1148	4	1340	3	12.2855	gfp-low	gfp-low	3087	1806	Infected	Batch1	AM_1
AGGGCTCCACGCAGTC_1	inf_1	15400	3423	179	4	998	3	2.35065	gfp-low	gfp-low	2721	1410	Infected	Batch1	AM_1
AGGGCTCGTTTAGAGA_1	inf_1	4372	1541	560	4	1326	3	13.6093	gfp-low	gfp-low	2883	1461	Infected	Batch1	AM_3
AGGGTCCCATGAATCC_1	inf_1	11178	2667	352	4	1198	3	8.09626	gfp-low	gfp-low	2485	1067	Infected	Batch1	AM_1
AGGGTTTTCAGCTCTC_1	inf_1	791	367	378	4	258	3	1.89633	gfp-low	gfp-low	1917	501	Infected	Batch1	Neutrophils
AGGTAGGAGATGGGCT_1	inf_1	2299	943	940	4	1121	3	33.1448	gfp-low	gfp-low	2370	941	Infected	Batch1	AM_4
AGGTAGGGTGCCTAAT_1	inf_1	899	583	638	4	608	3	0.889878	gfp-low	gfp-low	2006	661	Infected	Batch1	Neutrophils
AGGTAGGTCACTAGCA_1	inf_1	1384	691	167	4	462	3	9.75434	gfp-low	gfp-low	2144	691	Infected	Batch1	AM_3
AGGTCATAGCCTCAAT_1	inf_1	6801	2117	362	4	1023	3	9.8956	gfp-low	gfp-low	2994	1611	Infected	Batch1	AM_1
AGGTCATTCATGGCCG_1	inf_1	2811	1139	130	4	511	3	17.4315	gfp-low	gfp-low	2640	1139	Infected	Batch1	IM_3
AGGTCATTCCTCTCGA_1	inf_1	603	411	97	4	256	3	17.2471	gfp-low	gfp-low	1795	591	Infected	Batch1	IM_1
AGGTCATTCTGGCCTT_1	inf_1	5477	2031	481	4	1116	3	9.74986	gfp-low	gfp-low	3088	1830	Infected	Batch1	Macrophages/T-cells
AGGTCTAAGGGTTGCA_1	inf_1	5461	1814	208	4	541	3	9.19246	gfp-low	gfp-low	3005	1614	Infected	Batch1	AM_1
AGGTCTAGTAGTCTTG_1	inf_1	506	284	267	4	710	3	29.6443	gfp-low	gfp-low	1967	487	Infected	Batch1	AM_3
AGGTGTTCACTCACTC_1	inf_1	4712	1739	193	4	1014	3	16.0441	gfp-low	gfp-low	2941	1621	Infected	Batch1	AM_1
AGGTGTTGTTTCTATC_1	inf_1	1236	562	80	4	256	3	36.6505	gfp-low	gfp-low	2086	616	Infected	Batch1	IM_1
AGGTTACCAAGCGATG_1	inf_1	8788	2521	545	4	1383	3	16.3405	gfp-low	gfp-low	2752	1400	Infected	Batch1	AM_1
AGGTTACCAATGTCAC_1	inf_1	2624	1136	1332	4	1314	3	21.8369	gfp-low	gfp-low	2565	1136	Infected	Batch1	AM_1
AGGTTACGTGGTAATA_1	inf_1	4556	1449	820	4	1215	3	20.5443	gfp-low	gfp-low	2864	1351	Infected	Batch1	IM_3
AGGTTACGTTCGATTG_1	inf_1	859	447	130	4	656	3	19.092	gfp-low	gfp-low	2109	533	Infected	Batch1	AM_2
AGTACCATCCTTCTTC_1	inf_1	1384	785	93	4	182	3	8.30925	gfp-low	gfp-low	2043	785	Infected	Batch1	Monocytes
AGTAGCTAGAGCATTA_1	inf_1	3541	1502	652	4	1312	3	5.93053	gfp-low	gfp-low	2860	1502	Infected	Batch1	AM_3
AGTAGCTTCGTTAGTG_1	inf_1	6428	1925	686	4	1212	3	12.4144	gfp-low	gfp-low	3005	1527	Infected	Batch1	AM_1
AGTAGCTTCTAGGCAT_1	inf_1	1892	996	80	4	322	3	8.66808	gfp-low	gfp-low	2183	996	Infected	Batch1	Monocytes
AGTAGTCAGCAACCAG_1	inf_1	1168	627	151	4	491	3	11.0445	gfp-low	gfp-low	2127	645	Infected	Batch1	AM_3
AGTAGTCAGGCAGCTA_1	inf_1	4801	1537	835	4	1379	3	35.5968	gfp-low	gfp-low	2908	1381	Infected	Batch1	Macrophages/T-cells
AGTAGTCCAATTGCCA_1	inf_1	1575	871	152	4	738	3	11.6825	gfp-low	gfp-low	2087	870	Infected	Batch1	IM_1
AGTAGTCCAGTATTCG_1	inf_1	1309	804	103	4	278	3	8.93812	gfp-low	gfp-low	2021	810	Infected	Batch1	Monocytes
AGTAGTCCATCTTCGC_1	inf_1	2255	1151	218	4	808	3	8.38137	gfp-low	gfp-low	2321	1151	Infected	Batch1	AM_3
AGTAGTCCATGATGCT_1	inf_1	4332	1602	116	4	826	3	12.8578	gfp-low	gfp-low	2892	1524	Infected	Batch1	AM_1
AGTAGTCGTAAGTCAA_1	inf_1	3687	1146	2034	4	1562	3	37.6458	gfp-low	gfp-low	2764	1127	Infected	Batch1	AM_3
AGTCAACCAGATAAAC_1	inf_1	526	365	160	4	211	3	1.3308	gfp-low	gfp-low	1724	563	Infected	Batch1	Neutrophils
AGTCACAGTAACCAGG_1	inf_1	5029	1687	489	4	1068	3	5.13024	gfp-low	gfp-low	2979	1539	Infected	Batch1	Neutrophils
AGTCACAGTTGGGACA_1	inf_1	4478	1615	100	4	341	3	6.14113	gfp-low	gfp-low	2922	1531	Infected	Batch1	IM_3
AGTCATGAGCAGGTCA_1	inf_1	9988	2998	668	4	1246	3	3.98478	gfp-low	gfp-low	2759	1523	Infected	Batch1	AM_4
AGTCATGTCATTGCTT_1	inf_1	2235	1125	523	4	504	3	16.1969	gfp-low	gfp-low	2316	1125	Infected	Batch1	AM_3
AGTCTCCGTGGAACAC_1	inf_1	6721	2025	156	4	653	3	5.05877	gfp-low	gfp-low	3065	1591	Infected	Batch1	AM_4
AGTGATCCAGCTGTCG_1	inf_1	1697	744	310	4	1094	3	38.5975	gfp-low	gfp-low	2214	744	Infected	Batch1	AM_2
AGTGCCGGTACTGGGA_1	inf_1	5641	1927	283	4	1077	3	9.30686	gfp-low	gfp-low	3051	1675	Infected	Batch1	AM_1
AGTGCCGTCCCTTCCC_1	inf_1	4884	1668	124	4	747	3	16.5848	gfp-low	gfp-low	2951	1524	Infected	Batch1	IM_3
AGTGTTGAGGGATCAC_1	inf_1	3267	1338	680	4	1212	3	21.0285	gfp-low	gfp-low	2774	1338	Infected	Batch1	AM_3
AGTGTTGAGTTGTCGT_1	inf_1	2626	1130	710	4	1228	3	22.9246	gfp-low	gfp-low	2569	1130	Infected	Batch1	AM_1
AGTGTTGCAAGGTCTT_1	inf_1	3532	1125	563	4	1189	3	25.3964	gfp-low	gfp-low	2742	1123	Infected	Batch1	AM_1
AGTGTTGCACCGGAAA_1	inf_1	3790	1392	348	4	743	3	4.98681	gfp-low	gfp-low	2874	1378	Infected	Batch1	IM_3
AGTGTTGGTTGGGATG_1	inf_1	6628	2047	395	4	1262	3	12.8847	gfp-low	gfp-low	2981	1581	Infected	Batch1	AM_1
AGTTAGCAGCTCCACG_1	inf_1	1889	916	296	4	1139	3	22.9751	gfp-low	gfp-low	2188	916	Infected	Batch1	AM_2
AGTTAGCAGCTGAGCA_1	inf_1	2626	1092	1638	4	1301	3	21.3633	gfp-low	gfp-low	2568	1092	Infected	Batch1	AM_3
AGTTAGCGTCTTGCGG_1	inf_1	4614	1631	552	4	1106	3	9.1244	gfp-low	gfp-low	2938	1539	Infected	Batch1	AM_1
AGTTAGCTCACGATCA_1	inf_1	4080	1458	231	4	823	3	29.9755	gfp-low	gfp-low	2924	1420	Infected	Batch1	AM_4
AGTTCCCTCTCACTCG_1	inf_1	3337	1325	329	4	1104	3	18.8193	gfp-low	gfp-low	2784	1325	Infected	Batch1	AM_3
AGTTCCCTCTCCGAGG_1	inf_1	1439	910	130	4	472	3	3.68311	gfp-low	gfp-low	2006	911	Infected	Batch1	IM_1
AGTTCCCTCTGGAGAG_1	inf_1	5680	2031	1116	4	1395	3	7.92254	gfp-low	gfp-low	3111	1782	Infected	Batch1	AM_1
AGTTCGACAGCTATAC_1	inf_1	984	623	71	4	164	3	16.7683	gfp-low	gfp-low	2088	686	Infected	Batch1	Monocytes
AGTTCGATCAAAGACA_1	inf_1	620	318	250	4	282	3	2.09677	gfp-low	gfp-low	1862	492	Infected	Batch1	Neutrophils
ATACCGAAGTAAAGCT_1	inf_1	9575	2667	386	4	1178	3	10.799	gfp-low	gfp-low	2732	1377	Infected	Batch1	IM_3
ATACCGAGTCCCAAAT_1	inf_1	13724	3144	332	4	1111	3	4.39376	gfp-low	gfp-low	2648	1314	Infected	Batch1	AM_1
ATACTTCCAAATGCTC_1	inf_1	8572	2291	233	4	615	3	3.53476	gfp-low	gfp-low	2831	1301	Infected	Batch1	IM_2
ATAGACCCAACCCTAA_1	inf_1	676	350	472	4	981	3	26.9231	gfp-low	gfp-low	2063	479	Infected	Batch1	AM_3
ATAGACCCACGACGTC_1	inf_1	4472	1643	117	4	676	3	9.88372	gfp-low	gfp-low	2963	1557	Infected	Batch1	IM_2
ATAGACCGTATCGTTG_1	inf_1	11104	2755	271	4	1261	3	4.87212	gfp-low	gfp-low	2551	1163	Infected	Batch1	AM_1
ATAGAGAAGTCTAGAA_1	inf_1	3742	1429	825	4	1124	3	11.2507	gfp-low	gfp-low	2841	1412	Infected	Batch1	AM_3
ATAGGCTAGCTGTTCA_1	inf_1	1621	722	568	4	544	3	1.2955	gfp-low	gfp-low	2125	723	Infected	Batch1	Neutrophils
ATATCCTCAAACCATC_1	inf_1	5246	2265	320	4	1111	3	6.11895	gfp-low	gfp-low	3186	2081	Infected	Batch1	Macrophages/T-cells
ATATCCTGTCTCTCCA_1	inf_1	10346	2741	233	4	1075	3	5.16142	gfp-low	gfp-low	2596	1254	Infected	Batch1	AM_1
ATATCCTTCTATGTGG_1	inf_1	1240	719	352	4	908	3	22.4194	gfp-low	gfp-low	2077	749	Infected	Batch1	AM_2
ATCACTTCAGTAACCT_1	inf_1	7063	2281	123	4	674	3	9.37279	gfp-low	gfp-low	3134	1735	Infected	Batch1	IM_3
ATCAGGTAGTTGTAGA_1	inf_1	3860	1296	136	4	578	3	11.4249	gfp-low	gfp-low	2860	1270	Infected	Batch1	IM_1
ATCATTCAGACGACTG_1	inf_1	678	361	85	4	279	3	34.8083	gfp-low	gfp-low	2023	530	Infected	Batch1	AM_2
ATCATTCAGGATTCAA_1	inf_1	4052	1667	678	4	1263	3	11.6239	gfp-low	gfp-low	2942	1628	Infected	Batch1	AM_4
ATCCACCGTGAACTAA_1	inf_1	5497	1294	71	4	190	3	0.181917	gfp-low	gfp-low	2855	1123	Infected	Batch1	AM_3
ATCCATTAGATGTTCC_1	inf_1	4369	1726	144	4	708	3	4.11994	gfp-low	gfp-low	2953	1653	Infected	Batch1	AM_3
ATCCATTTCCGTACGG_1	inf_1	4891	2031	415	4	1153	3	10.1411	gfp-low	gfp-low	3046	1891	Infected	Batch1	AM_4
ATCCATTTCGGAGATG_1	inf_1	1553	651	406	4	1229	3	26.3361	gfp-low	gfp-low	2200	651	Infected	Batch1	AM_2
ATCCATTTCTATGTGG_1	inf_1	5589	1822	271	4	1011	3	5.94024	gfp-low	gfp-low	2996	1571	Infected	Batch1	AM_1
ATCCCTGCACTATCCC_1	inf_1	3226	1489	99	4	260	3	3.44079	gfp-low	gfp-low	2828	1489	Infected	Batch1	Monocytes
ATCCCTGCAGTTAAAG_1	inf_1	2684	1234	564	4	1352	3	29.5827	gfp-low	gfp-low	2600	1234	Infected	Batch1	AM_4
ATCCCTGTCCAAACCA_1	inf_1	2669	1158	152	4	614	3	23.9041	gfp-low	gfp-low	2591	1158	Infected	Batch1	AM_1
ATCCCTGTCGCGTAGC_1	inf_1	2589	998	79	4	339	3	21.0506	gfp-low	gfp-low	2538	998	Infected	Batch1	AM_3
ATCCCTGTCGTGGACC_1	inf_1	6245	1750	94	4	392	3	5.46037	gfp-low	gfp-low	2989	1411	Infected	Batch1	IM_2
ATCCGTCTCCACCTCA_1	inf_1	8807	2631	279	4	711	3	2.20279	gfp-low	gfp-low	2919	1514	Infected	Batch1	IM_2
ATCCTATAGTGACACG_1	inf_1	4726	1795	254	4	944	3	8.59077	gfp-low	gfp-low	2989	1680	Infected	Batch1	AM_4
ATCCTATGTGATAGAT_1	inf_1	2558	1074	489	4	488	3	18.5692	gfp-low	gfp-low	2519	1069	Infected	Batch1	AM_3
ATCCTATTCGAGTCCG_1	inf_1	1314	776	91	4	255	3	5.32725	gfp-low	gfp-low	2007	781	Infected	Batch1	Monocytes
ATCGATGTCGAACGGA_1	inf_1	13229	3076	635	4	1267	3	6.56134	gfp-low	gfp-low	2601	1237	Infected	Batch1	AM_1
ATCGATGTCTCAAAGC_1	inf_1	3487	1513	798	4	1279	3	15.2853	gfp-low	gfp-low	2863	1512	Infected	Batch1	AM_1
ATCGCCTAGTTTGGCT_1	inf_1	5435	1514	1325	4	1229	3	39.7424	gfp-low	gfp-low	2907	1289	Infected	Batch1	AM_1
ATCGCCTCAAAGGCAC_1	inf_1	504	348	194	4	425	3	1.78571	gfp-low	gfp-low	1670	568	Infected	Batch1	Neutrophils
ATCGCCTCAGGGATAC_1	inf_1	6087	2029	496	4	1249	3	6.42353	gfp-low	gfp-low	3066	1701	Infected	Batch1	AM_1
ATCGGATAGAATTGCA_1	inf_1	797	366	601	4	1279	3	33.5006	gfp-low	gfp-low	2159	472	Infected	Batch1	AM_3
ATCGGATAGATGCTAA_1	inf_1	713	411	65	4	491	2	13.0435	gfp-low	gfp-low	2036	511	Infected	Batch1	AM_3
ATCGGATCACACGGAA_1	inf_1	3522	1332	459	4	1185	3	20.6985	gfp-low	gfp-low	2828	1332	Infected	Batch1	AM_1
ATCGGATCACGGAAGT_1	inf_1	7713	2255	595	4	1201	3	4.01919	gfp-low	gfp-low	2977	1562	Infected	Batch1	AM_1
ATCGGCGTCCCTGGTT_1	inf_1	5490	1940	122	4	653	3	7.30419	gfp-low	gfp-low	3089	1718	Infected	Batch1	AM_1
ATCGTAGGTTAGGACG_1	inf_1	2484	868	138	4	497	3	19.8873	gfp-low	gfp-low	2479	868	Infected	Batch1	IM_1
ATCGTCCAGGCGCTTC_1	inf_1	4707	1608	302	4	1077	3	13.2356	gfp-low	gfp-low	2917	1487	Infected	Batch1	AM_3
ATCGTCCGTCTACGTA_1	inf_1	5937	1989	467	4	1001	3	10.3756	gfp-low	gfp-low	3020	1669	Infected	Batch1	AM_1
ATCGTCCTCATTCGGA_1	inf_1	1058	595	80	4	199	3	20.3214	gfp-low	gfp-low	2065	642	Infected	Batch1	IM_1
ATCTCTAAGCTCGACC_1	inf_1	2871	1327	168	4	1118	3	11.8426	gfp-low	gfp-low	2687	1326	Infected	Batch1	AM_1
ATCTTCACAAGGTTGG_1	inf_1	3276	1276	868	4	1418	3	18.6813	gfp-low	gfp-low	2766	1276	Infected	Batch1	AM_3
ATCTTCACATAAGATG_1	inf_1	956	477	216	4	202	3	2.30126	gfp-low	gfp-low	2093	563	Infected	Batch1	Neutrophils
ATGAAAGAGCATTTGC_1	inf_1	14305	3119	1561	4	1294	3	11.849	gfp-low	gfp-low	2574	1168	Infected	Batch1	AM_1
ATGAAAGGTCACTACA_1	inf_1	3138	1306	558	4	1149	3	12.2052	gfp-low	gfp-low	2749	1306	Infected	Batch1	AM_3
ATGAAAGGTTCTAAGC_1	inf_1	3357	1233	403	4	1162	3	25.5585	gfp-low	gfp-low	2753	1232	Infected	Batch1	AM_1
ATGACCAGTTGCGGAA_1	inf_1	2298	903	388	4	1108	3	38.2942	gfp-low	gfp-low	2373	903	Infected	Batch1	AM_2
ATGAGTCGTGGGCTTC_1	inf_1	924	577	192	4	211	3	2.05628	gfp-low	gfp-low	2022	636	Infected	Batch1	AM_2
ATGAGTCTCTTACACT_1	inf_1	1199	757	69	4	301	3	4.25354	gfp-low	gfp-low	1996	773	Infected	Batch1	Monocytes
ATGCATGCAATGAAAC_1	inf_1	3164	1453	166	4	443	3	8.56511	gfp-low	gfp-low	2784	1452	Infected	Batch1	IM_2
ATGCCTCAGGGTATAT_1	inf_1	8021	2532	260	4	901	3	5.02431	gfp-low	gfp-low	2982	1703	Infected	Batch1	AM_1
ATGCGATAGTACCCTA_1	inf_1	541	305	315	4	420	3	1.84843	gfp-low	gfp-low	1844	495	Infected	Batch1	Neutrophils
ATGCGATCAGCAGAAC_1	inf_1	5090	1991	888	4	1535	3	8.99804	gfp-low	gfp-low	3074	1830	Infected	Batch1	AM_4
ATGCGATCATCCGTTC_1	inf_1	9115	2591	251	4	1255	3	5.06857	gfp-low	gfp-low	2796	1453	Infected	Batch1	AM_1
ATGCGATTCGTGTGGC_1	inf_1	3604	1702	261	4	955	3	7.65816	gfp-low	gfp-low	2932	1691	Infected	Batch1	AM_1
ATGCGATTCTCGACGG_1	inf_1	4672	1598	236	4	1155	3	7.87671	gfp-low	gfp-low	2930	1506	Infected	Batch1	AM_1
ATGGAGGGTTACCGTA_1	inf_1	842	565	260	4	348	3	1.18765	gfp-low	gfp-low	1933	654	Infected	Batch1	Neutrophils
ATGGATCAGCGGGTTA_1	inf_1	4198	1287	124	4	425	3	9.90948	gfp-low	gfp-low	2846	1242	Infected	Batch1	IM_3
ATGGATCCAGGATCTT_1	inf_1	7639	2417	534	4	1200	3	6.44063	gfp-low	gfp-low	3025	1734	Infected	Batch1	AM_1
ATGGATCCATACAGGG_1	inf_1	5332	1683	1084	4	1340	3	16.6167	gfp-low	gfp-low	2967	1501	Infected	Batch1	AM_3
ATGGATCGTCACTTCC_1	inf_1	1531	829	279	4	762	3	17.9621	gfp-low	gfp-low	2100	827	Infected	Batch1	AM_4
ATGGATCTCACCTCTG_1	inf_1	5202	1994	373	4	1286	3	9.90004	gfp-low	gfp-low	3082	1808	Infected	Batch1	AM_1
ATGGATCTCATACGAC_1	inf_1	7169	2247	362	4	1231	3	7.96485	gfp-low	gfp-low	3003	1653	Infected	Batch1	AM_1
ATGGATCTCCCGTTGT_1	inf_1	1142	447	658	4	485	3	0.875657	gfp-low	gfp-low	2042	507	Infected	Batch1	Neutrophils
ATGGATCTCCGGGACT_1	inf_1	5477	2008	548	4	1295	3	8.14314	gfp-low	gfp-low	3101	1781	Infected	Batch1	AM_1
ATGGATCTCGCAATTG_1	inf_1	533	244	196	4	360	3	1.68856	gfp-low	gfp-low	1797	465	Infected	Batch1	Neutrophils
ATGGATCTCGTGGCTG_1	inf_1	5008	1827	277	4	1203	3	14.4169	gfp-low	gfp-low	2992	1682	Infected	Batch1	AM_4
ATGGGAGAGGCTGGAT_1	inf_1	1367	683	64	4	328	3	15.2158	gfp-low	gfp-low	2121	685	Infected	Batch1	AM_3
ATGGGAGGTAGTCGTT_1	inf_1	6305	2104	1439	4	1251	3	13.8462	gfp-low	gfp-low	3037	1718	Infected	Batch1	AM_1
ATGGGAGTCAAGCTGT_1	inf_1	2144	863	136	4	621	3	32.0896	gfp-low	gfp-low	2306	863	Infected	Batch1	AM_3
ATGGGAGTCACTTTGT_1	inf_1	7099	2002	1843	4	1212	3	21.3269	gfp-low	gfp-low	2942	1434	Infected	Batch1	AM_1
ATGGGTTCACCCATAA_1	inf_1	1527	825	313	4	1118	3	14.0799	gfp-low	gfp-low	2108	824	Infected	Batch1	AM_1
ATGGGTTGTCCAGGTC_1	inf_1	1903	779	291	4	1110	3	26.6421	gfp-low	gfp-low	2259	779	Infected	Batch1	AM_2
ATGGGTTGTGAGTCAG_1	inf_1	527	322	300	4	291	3	1.89753	gfp-low	gfp-low	1779	526	Infected	Batch1	Neutrophils
ATGGGTTTCGCTGATA_1	inf_1	6975	2145	135	4	842	3	9.41935	gfp-low	gfp-low	3124	1597	Infected	Batch1	Macrophages/B-cells
ATGGTTGGTCTAGGCC_1	inf_1	4077	1481	945	4	1316	3	32.5975	gfp-low	gfp-low	2886	1432	Infected	Batch1	AM_4
ATGTCCCCAAGTGATA_1	inf_1	2514	1127	222	4	942	3	12.3309	gfp-low	gfp-low	2500	1126	Infected	Batch1	AM_3
ATGTCCCCATTACTCT_1	inf_1	1301	699	148	4	640	3	6.53344	gfp-low	gfp-low	2048	708	Infected	Batch1	IM_1
ATGTCCCTCATAGCAC_1	inf_1	785	443	861	4	1122	3	2.67516	gfp-low	gfp-low	1948	555	Infected	Batch1	Neutrophils
ATGTCTTAGAAGTCAT_1	inf_1	6205	2269	249	4	1228	3	13.5375	gfp-low	gfp-low	3108	1845	Infected	Batch1	IM_2
ATGTCTTAGGTTGGAC_1	inf_1	4587	1672	680	4	614	3	15.0643	gfp-low	gfp-low	2952	1567	Infected	Batch1	AM_1
ATGTCTTGTTGTCCCT_1	inf_1	5989	1876	269	4	1263	3	4.75872	gfp-low	gfp-low	2996	1567	Infected	Batch1	AM_1
ATGTCTTTCGGCCTTT_1	inf_1	8831	2657	1039	4	1213	3	8.61737	gfp-low	gfp-low	2823	1499	Infected	Batch1	Neutrophils
ATTACCTCATGACGGA_1	inf_1	6024	2011	407	4	949	3	9.99336	gfp-low	gfp-low	3094	1729	Infected	Batch1	Neutrophils
ATTACCTTCATTTACC_1	inf_1	4614	1705	781	4	1263	3	13.329	gfp-low	gfp-low	2945	1599	Infected	Batch1	AM_1
ATTACTCCAAAGGATT_1	inf_1	914	441	129	4	948	3	34.2451	gfp-low	gfp-low	2204	523	Infected	Batch1	AM_2
ATTACTCGTCAACATC_1	inf_1	5654	1773	349	4	1153	3	11.3548	gfp-low	gfp-low	2992	1529	Infected	Batch1	AM_3
ATTACTCGTTACAGCT_1	inf_1	9079	2881	186	4	585	3	4.71418	gfp-low	gfp-low	2902	1667	Infected	Batch1	AM_1
ATTACTCTCATTACCT_1	inf_1	1727	776	1090	4	1290	3	28.6045	gfp-low	gfp-low	2190	775	Infected	Batch1	AM_3
ATTATCCCAACAGATA_1	inf_1	5011	1926	229	4	1101	3	7.52345	gfp-low	gfp-low	3050	1768	Infected	Batch1	AM_1
ATTATCCCATAGAAAC_1	inf_1	6647	1947	356	4	891	3	3.88145	gfp-low	gfp-low	2996	1491	Infected	Batch1	AM_1
ATTATCCTCTCAGGCG_1	inf_1	2334	1012	107	4	787	3	8.65467	gfp-low	gfp-low	2382	1011	Infected	Batch1	IM_3
ATTCACTGTTACACTG_1	inf_1	5125	1677	292	4	951	3	13.4634	gfp-low	gfp-low	2973	1522	Infected	Batch1	AM_4
ATTCAGGAGTATCCTG_1	inf_1	4162	1875	107	4	720	3	6.82364	gfp-low	gfp-low	3052	1839	Infected	Batch1	AM_1
ATTCAGGCAATGCTCA_1	inf_1	1981	965	151	4	420	3	5.90611	gfp-low	gfp-low	2244	965	Infected	Batch1	AM_3
ATTCAGGGTTACGATC_1	inf_1	11765	2705	293	4	1207	3	9.23077	gfp-low	gfp-low	2634	1093	Infected	Batch1	IM_3
ATTCAGGTCAACCTCC_1	inf_1	862	477	270	4	234	3	1.50812	gfp-low	gfp-low	2004	583	Infected	Batch1	Neutrophils
ATTCAGGTCTATGTGG_1	inf_1	896	417	507	4	239	3	1.00446	gfp-low	gfp-low	2017	530	Infected	Batch1	Neutrophils
ATTCATCCACAGCCAC_1	inf_1	2138	821	198	4	440	3	24.696	gfp-low	gfp-low	2294	821	Infected	Batch1	IM_1
ATTCATCCAGTAGGAC_1	inf_1	8386	2435	279	4	1190	3	6.35583	gfp-low	gfp-low	2829	1474	Infected	Batch1	AM_1
ATTCATCTCACTCCGT_1	inf_1	6538	2141	190	4	1147	3	8.21352	gfp-low	gfp-low	3035	1706	Infected	Batch1	AM_1
ATTCATCTCGTGCATA_1	inf_1	2101	1004	379	4	745	3	19.0861	gfp-low	gfp-low	2260	1002	Infected	Batch1	AM_1
ATTCCATCAAAGGATT_1	inf_1	14064	3076	296	4	1298	3	7.47298	gfp-low	gfp-low	2555	1176	Infected	Batch1	AM_1
ATTCCATCATCTGCGG_1	inf_1	1713	518	937	4	786	3	31.8155	gfp-low	gfp-low	2230	518	Infected	Batch1	Neutrophils
ATTCCCGAGACCATTC_1	inf_1	1293	503	294	4	356	3	1.39211	gfp-low	gfp-low	2113	540	Infected	Batch1	Neutrophils
ATTCCCGCATCTGTTT_1	inf_1	11463	2912	448	4	1161	3	3.39353	gfp-low	gfp-low	2530	1201	Infected	Batch1	AM_1
ATTCCCGTCATAGGCT_1	inf_1	8859	2454	578	4	1035	3	8.01445	gfp-low	gfp-low	2719	1330	Infected	Batch1	AM_1
ATTCCCGTCTACTCAT_1	inf_1	3680	1384	166	4	911	3	6.65761	gfp-low	gfp-low	2843	1376	Infected	Batch1	IM_1
ATTCCTACACAGTGAG_1	inf_1	915	527	163	4	282	3	2.0765	gfp-low	gfp-low	2025	618	Infected	Batch1	Neutrophils
ATTCCTATCCTACCAC_1	inf_1	6503	2058	238	4	1022	3	8.42688	gfp-low	gfp-low	3028	1627	Infected	Batch1	AM_1
ATTCCTATCGCGGACT_1	inf_1	3448	1473	571	4	1278	3	13.6021	gfp-low	gfp-low	2832	1473	Infected	Batch1	AM_1
ATTCCTATCGGCTTCT_1	inf_1	10910	2842	279	4	1281	3	8.42346	gfp-low	gfp-low	2614	1235	Infected	Batch1	AM_1
ATTCGTTGTCAGCGTC_1	inf_1	1937	743	1765	4	1642	3	32.1115	gfp-low	gfp-low	2272	743	Infected	Batch1	AM_3
ATTCGTTGTGATAGAT_1	inf_1	3272	1296	1049	4	1294	3	19.2543	gfp-low	gfp-low	2764	1296	Infected	Batch1	AM_1
ATTCTACAGATCCCGC_1	inf_1	5052	1738	722	4	1107	3	13.0048	gfp-low	gfp-low	2993	1585	Infected	Batch1	AM_1
ATTCTTGAGCTAAACA_1	inf_1	4582	1599	971	4	1198	3	21.519	gfp-low	gfp-low	2896	1494	Infected	Batch1	AM_3
ATTCTTGAGGGATCTG_1	inf_1	1423	636	192	4	898	3	30.9909	gfp-low	gfp-low	2150	639	Infected	Batch1	AM_3
ATTCTTGAGGGCTGAT_1	inf_1	1036	502	160	4	558	3	33.3977	gfp-low	gfp-low	2164	576	Infected	Batch1	AM_2
ATTCTTGAGGTTGTTC_1	inf_1	4927	1851	1001	4	1194	3	16.4806	gfp-low	gfp-low	3008	1704	Infected	Batch1	AM_1
ATTCTTGCAGTGAGCA_1	inf_1	2143	1034	113	4	254	3	6.85954	gfp-low	gfp-low	2281	1034	Infected	Batch1	Monocytes
ATTCTTGGTGTGCCTG_1	inf_1	6498	2428	300	4	784	3	5.83256	gfp-low	gfp-low	3193	1986	Infected	Batch1	Macrophages/T-cells
ATTGGGTAGGCAATGC_1	inf_1	7163	2249	569	4	1241	3	6.25436	gfp-low	gfp-low	2976	1646	Infected	Batch1	AM_1
ATTGTTCTCATGGATC_1	inf_1	4381	1675	91	4	384	3	4.8619	gfp-low	gfp-low	2992	1605	Infected	Batch1	Monocytes
ATTGTTCTCGAGCTGC_1	inf_1	5391	1875	752	4	1316	3	20.2003	gfp-low	gfp-low	3007	1648	Infected	Batch1	IM_1
ATTGTTCTCTATCGCC_1	inf_1	9661	3016	1411	4	951	3	9.48142	gfp-low	gfp-low	2787	1553	Infected	Batch1	AM_1
ATTTACCAGCTGTGCC_1	inf_1	7676	2375	252	4	799	3	6.80042	gfp-low	gfp-low	3023	1652	Infected	Batch1	AM_1
ATTTACCAGGAGATAG_1	inf_1	2338	1103	101	4	189	3	10.0513	gfp-low	gfp-low	2376	1103	Infected	Batch1	IM_2
ATTTACCTCATTCATC_1	inf_1	506	385	276	4	230	3	3.95257	gfp-low	gfp-low	1728	560	Infected	Batch1	AM_2
ATTTCACAGTGCACCC_1	inf_1	1379	835	186	4	500	3	12.6904	gfp-low	gfp-low	1978	835	Infected	Batch1	DC.103+11B-
ATTTCTGTCACATACG_1	inf_1	1895	1050	217	4	647	3	11.4512	gfp-low	gfp-low	2126	1050	Infected	Batch1	IM_1
ATTTCTGTCCATCAGA_1	inf_1	687	464	163	3	146	3	1.01892	gfp-low	gfp-low	1851	608	Infected	Batch1	Neutrophils
CAAAGAAAGACGCAGT_1	inf_1	4181	1485	449	4	813	3	8.68213	gfp-low	gfp-low	2902	1439	Infected	Batch1	IM_3
CAAAGAAAGCTTCTAG_1	inf_1	2816	1171	207	4	972	3	22.6562	gfp-low	gfp-low	2646	1171	Infected	Batch1	AM_1
CAAAGAAAGGAAGAAC_1	inf_1	4669	1834	639	4	1199	3	10.7089	gfp-low	gfp-low	2986	1725	Infected	Batch1	AM_4
CAAAGAACAGCACGAA_1	inf_1	2783	1308	104	4	270	3	4.31189	gfp-low	gfp-low	2649	1308	Infected	Batch1	Monocytes
CAAAGAACATAATCCG_1	inf_1	2811	1216	211	4	1159	3	31.8392	gfp-low	gfp-low	2648	1215	Infected	Batch1	Macrophages/T-cells
CAAAGAATCCGTCAAA_1	inf_1	929	548	721	4	1312	3	22.282	gfp-low	gfp-low	2144	631	Infected	Batch1	AM_4
CAACAACAGTATGGAT_1	inf_1	6547	2014	249	4	694	3	10.3864	gfp-low	gfp-low	3040	1587	Infected	Batch1	AM_1
CAACAACCAATGTTGC_1	inf_1	4911	1641	258	4	537	3	16.7787	gfp-low	gfp-low	2942	1486	Infected	Batch1	IM_2
CAACAACTCCTTATGT_1	inf_1	4477	1669	299	4	1291	3	7.66138	gfp-low	gfp-low	2933	1590	Infected	Batch1	AM_1
CAACCAACACCGGCTA_1	inf_1	10465	3263	437	4	1407	3	11.3235	gfp-low	gfp-low	2770	1575	Infected	Batch1	AM_4
CAACCTCTCACGGGCT_1	inf_1	6198	2013	1185	4	1309	3	31.0261	gfp-low	gfp-low	3019	1592	Infected	Batch1	AM_1
CAACGATAGCAGAAAG_1	inf_1	13476	3276	308	4	1261	3	2.68626	gfp-low	gfp-low	2713	1371	Infected	Batch1	IM_2
CAACGGCAGGTAGCCA_1	inf_1	1445	824	284	4	764	3	16.4014	gfp-low	gfp-low	2076	823	Infected	Batch1	AM_4
CAACGGCCATAGGTTC_1	inf_1	2217	892	406	4	438	3	25.2143	gfp-low	gfp-low	2336	892	Infected	Batch1	Monocytes
CAACGGCGTGTCTTAG_1	inf_1	7669	2123	150	4	598	3	8.90599	gfp-low	gfp-low	2970	1451	Infected	Batch1	IM_2
CAAGACTAGGTAGGCT_1	inf_1	2770	1147	297	4	1002	3	15.7762	gfp-low	gfp-low	2624	1147	Infected	Batch1	AM_3
CAAGACTCAAATGCGG_1	inf_1	4570	1432	228	4	996	3	22.8884	gfp-low	gfp-low	2861	1336	Infected	Batch1	AM_4
CAAGACTTCATGGGAG_1	inf_1	2987	1346	160	4	1197	3	13.3579	gfp-low	gfp-low	2725	1345	Infected	Batch1	AM_1
CAAGAGGTCACCTCAC_1	inf_1	7600	2266	279	4	1248	3	9.19737	gfp-low	gfp-low	2957	1618	Infected	Batch1	AM_1
CAAGAGGTCGTAACAC_1	inf_1	751	374	170	4	460	3	38.482	gfp-low	gfp-low	2070	506	Infected	Batch1	AM_2
CAAGAGGTCGTGGTAT_1	inf_1	754	455	341	4	180	3	0.530504	gfp-low	gfp-low	1890	588	Infected	Batch1	AM_2
CAAGGGATCAAGTCGT_1	inf_1	10547	2645	542	4	1211	3	7.85057	gfp-low	gfp-low	2695	1215	Infected	Batch1	AM_4
CAATACGAGATAACAC_1	inf_1	880	505	79	4	468	3	22.8409	gfp-low	gfp-low	2132	590	Infected	Batch1	AM_2
CAATACGCATACCAGT_1	inf_1	842	377	444	4	1291	3	38.361	gfp-low	gfp-low	2200	475	Infected	Batch1	AM_3
CAATACGTCGCACGGT_1	inf_1	7821	2238	256	4	1156	3	8.37489	gfp-low	gfp-low	2942	1541	Infected	Batch1	AM_1
CAATCGACAAATAAGC_1	inf_1	2844	1236	213	4	940	3	10.9001	gfp-low	gfp-low	2657	1236	Infected	Batch1	AM_3
CAATCGACAGCAAGAC_1	inf_1	4628	1514	457	4	1295	3	5.9637	gfp-low	gfp-low	2894	1435	Infected	Batch1	AM_3
CAATCGACATACAGCT_1	inf_1	3233	1445	588	4	1210	3	9.40303	gfp-low	gfp-low	2790	1442	Infected	Batch1	AM_3
CAATTTCAGGACTAAT_1	inf_1	3689	1417	596	4	1208	3	25.7251	gfp-low	gfp-low	2848	1404	Infected	Batch1	AM_1
CAATTTCCACACCTAA_1	inf_1	2487	1175	122	4	493	3	7.72014	gfp-low	gfp-low	2484	1173	Infected	Batch1	IM_3
CAATTTCCATAATCCG_1	inf_1	3874	1180	76	4	237	3	0.154879	gfp-low	gfp-low	2778	1160	Infected	Batch1	AM_3
CACAACAAGAGTTGAT_1	inf_1	10335	2505	505	4	1164	3	6.02806	gfp-low	gfp-low	2581	1112	Infected	Batch1	IM_2
CACACAAGTCGGTAAG_1	inf_1	6944	2333	873	4	1337	3	8.58295	gfp-low	gfp-low	3094	1782	Infected	Batch1	AM_1
CACACAAGTGCCCACA_1	inf_1	2136	902	948	4	589	3	0.79588	gfp-low	gfp-low	2250	899	Infected	Batch1	Neutrophils
CACACAATCCTACCAC_1	inf_1	928	612	637	4	691	3	7.11207	gfp-low	gfp-low	2076	687	Infected	Batch1	Neutrophils
CACACAATCTGGCCTT_1	inf_1	8446	2569	183	4	698	3	6.63036	gfp-low	gfp-low	2869	1544	Infected	Batch1	AM_1
CACAGATAGAATTGTG_1	inf_1	9978	2539	320	4	1224	3	5.94307	gfp-low	gfp-low	2597	1184	Infected	Batch1	AM_1
CACAGGCCAGGTCTCG_1	inf_1	1729	940	251	4	368	3	6.36206	gfp-low	gfp-low	2105	940	Infected	Batch1	DC.103+11B-
CACAGGCTCCAAGCTA_1	inf_1	5827	1800	91	4	327	3	5.90355	gfp-low	gfp-low	3082	1513	Infected	Batch1	IM_2
CACAGGCTCTAGGCCG_1	inf_1	13763	2927	202	4	1118	3	6.26317	gfp-low	gfp-low	2620	1129	Infected	Batch1	AM_1
CACATGAGTTTCCCAC_1	inf_1	2999	1317	600	4	860	3	3.53451	gfp-low	gfp-low	2750	1317	Infected	Batch1	Neutrophils
CACATGATCCTGTACC_1	inf_1	878	431	366	4	1113	3	33.9408	gfp-low	gfp-low	2141	537	Infected	Batch1	AM_4
CACCAAACACGTAGTT_1	inf_1	1074	648	114	4	283	3	8.56611	gfp-low	gfp-low	2056	672	Infected	Batch1	Monocytes
CACCGTTGTCGTTGGC_1	inf_1	2690	1067	105	4	628	3	15.7621	gfp-low	gfp-low	2592	1067	Infected	Batch1	IM_1
CACCGTTGTGCGAGTA_1	inf_1	4331	1631	479	4	1215	3	12.0296	gfp-low	gfp-low	2955	1579	Infected	Batch1	AM_4
CACGAATAGCATACTC_1	inf_1	814	400	208	4	424	3	3.80835	gfp-low	gfp-low	1970	514	Infected	Batch1	Neutrophils
CACGAATTCTATACGG_1	inf_1	2015	976	111	4	790	3	4.11911	gfp-low	gfp-low	2236	976	Infected	Batch1	AM_2
CACGGGTCATTCCTAT_1	inf_1	1025	623	71	4	338	3	14.1463	gfp-low	gfp-low	2058	690	Infected	Batch1	Monocytes
CACGGGTTCCGTTTCG_1	inf_1	5731	2071	277	4	1029	3	13.5927	gfp-low	gfp-low	3114	1813	Infected	Batch1	AM_1
CACGTTCAGAAATTCG_1	inf_1	1598	802	55	3	455	3	10.0751	gfp-low	gfp-low	2161	802	Infected	Batch1	AM_3
CACGTTCAGGGAGGTG_1	inf_1	912	554	485	4	405	3	1.53509	gfp-low	gfp-low	2062	629	Infected	Batch1	Neutrophils
CACGTTCTCGGACGTC_1	inf_1	1136	630	474	4	392	3	1.23239	gfp-low	gfp-low	2005	682	Infected	Batch1	Neutrophils
CACTGAACAATAACGA_1	inf_1	9307	2752	378	4	1269	3	9.01472	gfp-low	gfp-low	2798	1502	Infected	Batch1	AM_4
CACTGGGCATCGTCCT_1	inf_1	750	521	107	4	521	3	10.8	gfp-low	gfp-low	1923	631	Infected	Batch1	Monocytes
CACTGTCGTGCAAGAC_1	inf_1	2737	998	282	4	1075	3	17.5009	gfp-low	gfp-low	2593	998	Infected	Batch1	AM_1
CACTTCGCAATCCAGT_1	inf_1	2167	1096	257	4	1139	3	15.6437	gfp-low	gfp-low	2277	1096	Infected	Batch1	AM_1
CACTTCGCACAGAAGC_1	inf_1	1607	601	506	4	1181	3	39.7635	gfp-low	gfp-low	2241	601	Infected	Batch1	AM_3
CACTTCGCACAGTACT_1	inf_1	2975	1203	543	4	1214	3	30.6218	gfp-low	gfp-low	2695	1201	Infected	Batch1	AM_4
CACTTCGTCGGAGCAA_1	inf_1	3217	1449	594	4	1339	3	20.4228	gfp-low	gfp-low	2786	1448	Infected	Batch1	AM_4
CAGAGCCGTCGCAGTC_1	inf_1	3771	1423	236	4	1256	3	24.1846	gfp-low	gfp-low	2855	1405	Infected	Batch1	AM_1
CAGATACCAACCGTGC_1	inf_1	891	569	382	4	592	3	4.0404	gfp-low	gfp-low	1993	641	Infected	Batch1	Neutrophils
CAGATACCAACGATTC_1	inf_1	2402	1006	1080	4	1356	3	18.8593	gfp-low	gfp-low	2421	1005	Infected	Batch1	AM_3
CAGATCAAGCCACAAG_1	inf_1	3209	1358	188	4	599	3	28.015	gfp-low	gfp-low	2780	1358	Infected	Batch1	AM_1
CAGATCAAGGGCGAGA_1	inf_1	1357	786	96	4	360	3	6.04274	gfp-low	gfp-low	2059	787	Infected	Batch1	Monocytes
CAGATCACAGCTGCCA_1	inf_1	1743	868	62	4	314	3	6.76994	gfp-low	gfp-low	2136	867	Infected	Batch1	Monocytes
CAGATCATCCCTCATG_1	inf_1	3493	1490	125	4	588	3	16.2611	gfp-low	gfp-low	2870	1486	Infected	Batch1	IM_2
CAGATCATCGGCGATC_1	inf_1	6799	2208	485	4	1233	3	7.73643	gfp-low	gfp-low	3048	1732	Infected	Batch1	AM_1
CAGATTGAGCATTTGC_1	inf_1	2862	1177	1359	4	1396	3	21.0342	gfp-low	gfp-low	2661	1176	Infected	Batch1	AM_1
CAGATTGAGCTCGACC_1	inf_1	3385	1120	201	4	782	3	15.1256	gfp-low	gfp-low	2761	1119	Infected	Batch1	IM_2
CAGATTGTCGCCTTTG_1	inf_1	4210	1652	257	4	1068	3	12.0428	gfp-low	gfp-low	2922	1593	Infected	Batch1	AM_1
CAGCAATCAAGCTACT_1	inf_1	641	424	416	4	376	3	1.24805	gfp-low	gfp-low	1778	571	Infected	Batch1	Neutrophils
CAGCAATTCTTACCAT_1	inf_1	702	424	260	4	445	3	1.85185	gfp-low	gfp-low	1875	551	Infected	Batch1	Neutrophils
CAGCAATTCTTCTAAC_1	inf_1	8647	2313	723	4	1206	3	7.50549	gfp-low	gfp-low	2797	1364	Infected	Batch1	AM_1
CAGCACGGTCTACACA_1	inf_1	674	429	501	4	514	3	1.92878	gfp-low	gfp-low	1868	560	Infected	Batch1	Neutrophils
CAGCACGTCCATCACC_1	inf_1	1697	919	312	4	1064	3	13.5533	gfp-low	gfp-low	2129	919	Infected	Batch1	AM_3
CAGCAGCTCGTTCTGC_1	inf_1	3859	1432	226	4	1199	3	18.0876	gfp-low	gfp-low	2874	1411	Infected	Batch1	AM_1
CAGCAGCTCTCTGGTC_1	inf_1	1157	494	380	4	1185	3	34.5722	gfp-low	gfp-low	2225	522	Infected	Batch1	AM_3
CAGCCAGTCAACCTCC_1	inf_1	6017	1853	494	4	1212	3	13.4452	gfp-low	gfp-low	3070	1530	Infected	Batch1	AM_4
CAGCGTGCAACGGTAG_1	inf_1	1993	877	58	4	450	3	3.713	gfp-low	gfp-low	2256	877	Infected	Batch1	AM_3
CAGCGTGCAGCTACCG_1	inf_1	7083	2107	251	4	880	3	2.88014	gfp-low	gfp-low	2944	1536	Infected	Batch1	AM_1
CAGCGTGGTCGAGCAA_1	inf_1	3697	1347	121	4	508	3	1.64999	gfp-low	gfp-low	2831	1341	Infected	Batch1	Macrophages/B-cells
CAGCGTGGTGCTGATT_1	inf_1	797	299	692	4	814	3	37.2647	gfp-low	gfp-low	2142	430	Infected	Batch1	Neutrophils
CAGCGTGTCAGACTGT_1	inf_1	1154	516	429	4	1211	2	31.3692	gfp-low	gfp-low	2207	543	Infected	Batch1	AM_2
CAGGCCACACATACGT_1	inf_1	3302	1266	527	4	975	3	14.5972	gfp-low	gfp-low	2772	1266	Infected	Batch1	AM_3
CAGGCCAGTAGAGGAA_1	inf_1	2511	1119	451	4	1300	3	27.2401	gfp-low	gfp-low	2498	1118	Infected	Batch1	AM_1
CAGGGCTAGGAATTAC_1	inf_1	832	374	578	4	701	3	10.4567	gfp-low	gfp-low	2003	499	Infected	Batch1	Neutrophils
CAGGGCTGTCAGTCCG_1	inf_1	3558	1523	280	4	967	3	20.208	gfp-low	gfp-low	2874	1518	Infected	Batch1	AM_4
CAGGGCTGTTGCACGC_1	inf_1	6399	1888	1984	4	1233	3	11.0486	gfp-low	gfp-low	2974	1500	Infected	Batch1	AM_1
CAGTGCGAGCTAGCCC_1	inf_1	614	361	116	4	483	3	24.5928	gfp-low	gfp-low	1883	541	Infected	Batch1	IM_1
CAGTGCGAGGCTGAAC_1	inf_1	1605	920	368	4	742	3	9.09657	gfp-low	gfp-low	2062	920	Infected	Batch1	Monocytes
CAGTGCGCACACACGC_1	inf_1	3742	1291	808	4	1420	3	33.5115	gfp-low	gfp-low	2804	1261	Infected	Batch1	AM_2
CAGTGCGCATGGCCAC_1	inf_1	1014	423	563	4	413	3	1.77515	gfp-low	gfp-low	2065	521	Infected	Batch1	Neutrophils
CAGTTAGCATGAGAAT_1	inf_1	989	461	225	4	372	3	0.808898	gfp-low	gfp-low	2047	553	Infected	Batch1	Neutrophils
CAGTTAGGTATAGCTC_1	inf_1	9032	2473	991	4	1277	3	7.4845	gfp-low	gfp-low	2814	1393	Infected	Batch1	AM_1
CAGTTAGGTGGTTTGT_1	inf_1	3022	1182	764	4	1371	3	12.1443	gfp-low	gfp-low	2688	1182	Infected	Batch1	AM_3
CAGTTAGTCCCAAGTA_1	inf_1	2639	1231	79	4	168	3	6.93444	gfp-low	gfp-low	2590	1231	Infected	Batch1	IM_2
CAGTTAGTCCTCTAAT_1	inf_1	8527	2417	500	4	1064	3	9.34678	gfp-low	gfp-low	2821	1449	Infected	Batch1	AM_1
CATAAGCCAGGTGGAT_1	inf_1	959	499	785	4	1322	3	26.6945	gfp-low	gfp-low	2186	577	Infected	Batch1	AM_3
CATACAGTCCACCTGT_1	inf_1	2862	1160	286	4	806	3	22.1523	gfp-low	gfp-low	2655	1159	Infected	Batch1	IM_1
CATACCCCAAGAGTAT_1	inf_1	5068	1944	225	4	1159	3	4.93291	gfp-low	gfp-low	3024	1792	Infected	Batch1	AM_1
CATACCCCAGGAGGTT_1	inf_1	4940	1388	153	4	658	3	9.08907	gfp-low	gfp-low	2859	1250	Infected	Batch1	IM_3
CATACCCGTCCAGCAC_1	inf_1	2799	1192	269	4	1105	3	12.6474	gfp-low	gfp-low	2641	1192	Infected	Batch1	AM_3
CATACCCTCACTTGGA_1	inf_1	10699	2847	1491	4	1239	3	4.89765	gfp-low	gfp-low	2573	1273	Infected	Batch1	AM_1
CATACCCTCCTTCACG_1	inf_1	7896	2488	724	4	1413	3	11.5502	gfp-low	gfp-low	2971	1661	Infected	Batch1	AM_1
CATACTTGTATCGCGC_1	inf_1	4010	1369	97	4	498	3	11.1222	gfp-low	gfp-low	2842	1339	Infected	Batch1	IM_2
CATAGACAGAGCATCG_1	inf_1	8329	2543	1124	4	1289	3	10.3374	gfp-low	gfp-low	2884	1576	Infected	Batch1	AM_1
CATAGACAGAGGTTTA_1	inf_1	14503	3134	673	4	1249	3	4.13018	gfp-low	gfp-low	2529	1136	Infected	Batch1	AM_1
CATAGACGTCTTGAAC_1	inf_1	5068	1809	603	4	1265	3	6.2944	gfp-low	gfp-low	3000	1639	Infected	Batch1	AM_3
CATAGACTCCCTCGAT_1	inf_1	4824	1884	633	4	1065	3	8.70647	gfp-low	gfp-low	3013	1768	Infected	Batch1	AM_1
CATCAAGGTAAGCAAT_1	inf_1	6594	2250	618	4	1292	3	13.482	gfp-low	gfp-low	3130	1817	Infected	Batch1	AM_1
CATCAAGTCGTTCATT_1	inf_1	5554	1729	336	4	1220	3	10.839	gfp-low	gfp-low	2979	1491	Infected	Batch1	AM_1
CATCCACAGACTCAAA_1	inf_1	4966	1747	455	4	1178	3	21.6673	gfp-low	gfp-low	3002	1591	Infected	Batch1	IM_1
CATCCCACAATGCTCA_1	inf_1	552	351	83	4	244	3	15.942	gfp-low	gfp-low	1769	556	Infected	Batch1	IM_1
CATCCCAGTGACAGGT_1	inf_1	2917	1168	1346	4	1430	3	29.9623	gfp-low	gfp-low	2683	1166	Infected	Batch1	IM_1
CATCCCATCTGGCCTT_1	inf_1	705	493	84	4	413	3	15.8865	gfp-low	gfp-low	1862	641	Infected	Batch1	Monocytes
CATCCGTAGGACGGAG_1	inf_1	9741	2869	423	4	880	3	9.18797	gfp-low	gfp-low	2699	1387	Infected	Batch1	AM_1
CATCCGTGTCGTTCAA_1	inf_1	6818	2005	441	4	1098	3	23.79	gfp-low	gfp-low	2963	1484	Infected	Batch1	AM_1
CATCGCTCAAATACGA_1	inf_1	680	414	78	4	459	3	15.1471	gfp-low	gfp-low	1956	536	Infected	Batch1	AM_2
CATCGGGCACTAGGTT_1	inf_1	4690	1881	719	4	1368	3	9.97868	gfp-low	gfp-low	2996	1763	Infected	Batch1	AM_4
CATCGGGCATGCCGGT_1	inf_1	1305	695	150	4	487	3	19.6169	gfp-low	gfp-low	1982	732	Infected	Batch1	IM_1
CATCGGGTCATTCCTA_1	inf_1	4577	1593	100	4	465	3	4.17304	gfp-low	gfp-low	2966	1521	Infected	Batch1	IM_2
CATCGTCCATGTTTGG_1	inf_1	4086	1774	88	4	344	3	3.79344	gfp-low	gfp-low	2990	1738	Infected	Batch1	IM_3
CATCGTCGTACAGGTG_1	inf_1	1896	662	167	4	545	3	31.962	gfp-low	gfp-low	2243	662	Infected	Batch1	IM_1
CATCGTCTCACGACTA_1	inf_1	13807	3184	1669	4	1572	3	9.93699	gfp-low	gfp-low	2618	1261	Infected	Batch1	AM_1
CATCGTCTCCACACCT_1	inf_1	13939	3196	185	4	1060	3	2.19528	gfp-low	gfp-low	2693	1274	Infected	Batch1	IM_3
CATCGTCTCTCATTGT_1	inf_1	1040	629	35	4	158	3	7.40385	gfp-low	gfp-low	2076	663	Infected	Batch1	IM_1
CATGAGTGTTGAATCC_1	inf_1	8421	2174	217	4	1282	3	10.9369	gfp-low	gfp-low	2777	1324	Infected	Batch1	AM_1
CATGCAACAACGCCCA_1	inf_1	3954	1816	88	4	528	3	3.5913	gfp-low	gfp-low	2971	1777	Infected	Batch1	Macrophages/T-cells
CATGCAACATAGAATG_1	inf_1	4431	1832	169	4	915	3	8.32769	gfp-low	gfp-low	2979	1765	Infected	Batch1	AM_1
CATGCAATCCCGTGAG_1	inf_1	692	359	389	4	432	3	2.45665	gfp-low	gfp-low	1917	513	Infected	Batch1	Neutrophils
CATGCAATCCGTCCTA_1	inf_1	5554	1862	417	4	1239	3	14.152	gfp-low	gfp-low	3032	1642	Infected	Batch1	AM_1
CATGCGGGTCCACGCA_1	inf_1	12113	3383	935	4	1409	3	9.50219	gfp-low	gfp-low	2667	1459	Infected	Batch1	AM_1
CATGGATGTTGCATCA_1	inf_1	5174	1943	141	4	719	3	7.44105	gfp-low	gfp-low	3055	1770	Infected	Batch1	IM_3
CATGGATGTTTACTGG_1	inf_1	1960	1049	113	4	305	3	21.0204	gfp-low	gfp-low	2164	1047	Infected	Batch1	IM_1
CATGGTAAGCGATGGT_1	inf_1	7185	2019	149	4	546	3	8.81002	gfp-low	gfp-low	2974	1469	Infected	Batch1	IM_3
CATGGTACACCAATTG_1	inf_1	4330	1613	883	4	1380	3	15.2194	gfp-low	gfp-low	2934	1556	Infected	Batch1	AM_1
CATTCATCAGACACCC_1	inf_1	1614	644	701	4	1235	3	25.6506	gfp-low	gfp-low	2222	643	Infected	Batch1	AM_3
CATTCATTCACTACGA_1	inf_1	4046	1711	225	4	935	3	9.49086	gfp-low	gfp-low	2938	1671	Infected	Batch1	AM_4
CATTCATTCTAAACGC_1	inf_1	18107	3395	339	4	949	3	4.09786	gfp-low	gfp-low	2753	1309	Infected	Batch1	AM_1
CATTCCGAGGTAAGTT_1	inf_1	2470	1226	583	4	1008	3	14.2105	gfp-low	gfp-low	2468	1225	Infected	Batch1	AM_1
CATTCTAAGCGGCTCT_1	inf_1	5353	2115	744	4	1237	3	4.85709	gfp-low	gfp-low	3122	1904	Infected	Batch1	AM_1
CATTCTATCTAGTTCT_1	inf_1	6820	2133	80	4	718	3	6.99413	gfp-low	gfp-low	3068	1605	Infected	Batch1	IM_3
CATTGAGAGATGCTTC_1	inf_1	7566	2276	838	4	1351	3	14.8956	gfp-low	gfp-low	2884	1515	Infected	Batch1	AM_1
CATTGAGAGCCGTTGC_1	inf_1	7978	2209	1120	4	1293	3	11.7949	gfp-low	gfp-low	2811	1410	Infected	Batch1	AM_1
CATTGAGCAAACGTGG_1	inf_1	1224	563	298	4	1080	3	24.5098	gfp-low	gfp-low	2197	580	Infected	Batch1	AM_2
CATTGCCGTCGTTATG_1	inf_1	657	414	21	3	159	2	12.0244	gfp-low	gfp-low	1945	548	Infected	Batch1	IM_4
CATTGCCGTTATTCCT_1	inf_1	5209	2010	769	4	1351	3	12.0753	gfp-low	gfp-low	3080	1821	Infected	Batch1	AM_1
CATTGCCTCACTCGAA_1	inf_1	2970	1190	296	4	819	3	28.5522	gfp-low	gfp-low	2702	1190	Infected	Batch1	IM_1
CATTGTTCAGTTTGGT_1	inf_1	6497	1930	173	4	968	3	13.9757	gfp-low	gfp-low	2978	1517	Infected	Batch1	Macrophages/T-cells
CATTGTTCATTCACCC_1	inf_1	10876	3084	119	4	1198	3	3.84332	gfp-low	gfp-low	2700	1363	Infected	Batch1	Macrophages/T-cells
CATTGTTGTCCACTTC_1	inf_1	4160	1534	255	4	1012	3	11.25	gfp-low	gfp-low	2881	1492	Infected	Batch1	AM_3
CATTGTTGTGAGACCA_1	inf_1	9937	2783	220	4	978	3	5.77639	gfp-low	gfp-low	2670	1332	Infected	Batch1	AM_1
CATTGTTGTGGCTACC_1	inf_1	691	474	91	4	200	3	10.1302	gfp-low	gfp-low	1847	610	Infected	Batch1	Monocytes
CATTGTTTCATCCTGC_1	inf_1	3757	1503	351	4	1279	3	6.76071	gfp-low	gfp-low	2866	1493	Infected	Batch1	AM_1
CATTGTTTCCGTGGGT_1	inf_1	1355	582	116	4	274	3	32.1771	gfp-low	gfp-low	2110	593	Infected	Batch1	IM_1
CATTTCAAGTATAGAC_1	inf_1	5003	1881	237	4	845	3	8.79472	gfp-low	gfp-low	3051	1739	Infected	Batch1	IM_2
CATTTCACACAGCCTG_1	inf_1	4930	1749	108	4	403	3	14.6247	gfp-low	gfp-low	2985	1599	Infected	Batch1	IM_2
CCAAGCGTCGCCACTT_1	inf_1	1541	750	152	4	942	3	17.3913	gfp-low	gfp-low	2165	749	Infected	Batch1	AM_3
CCAATGAGTCGGTGAA_1	inf_1	921	578	106	4	395	3	11.4007	gfp-low	gfp-low	2070	644	Infected	Batch1	Monocytes
CCAATTTGTGTGTACT_1	inf_1	3594	1537	701	4	1361	3	10.3506	gfp-low	gfp-low	2858	1536	Infected	Batch1	AM_1
CCACAAAAGTCACACT_1	inf_1	2900	1151	821	4	1172	3	27.9655	gfp-low	gfp-low	2668	1150	Infected	Batch1	AM_2
CCACAAAAGTCATAGA_1	inf_1	2192	1021	299	4	936	3	18.1113	gfp-low	gfp-low	2301	1021	Infected	Batch1	AM_1
CCACAAACAGGGTCTC_1	inf_1	8089	2702	1316	4	1373	3	10.4957	gfp-low	gfp-low	3037	1803	Infected	Batch1	AM_1
CCACAAAGTAGGCTCC_1	inf_1	3247	1444	97	4	206	3	4.89683	gfp-low	gfp-low	2827	1440	Infected	Batch1	DC.103+11B-
CCACAAAGTTCTAAGC_1	inf_1	2121	921	127	4	535	3	19.9906	gfp-low	gfp-low	2290	921	Infected	Batch1	IM_2
CCACAAATCAAGGCTT_1	inf_1	2437	1152	141	4	435	3	5.49856	gfp-low	gfp-low	2440	1152	Infected	Batch1	AM_3
CCACACTAGGGTCAAC_1	inf_1	1587	854	216	4	1160	3	26.6541	gfp-low	gfp-low	2073	853	Infected	Batch1	AM_2
CCACACTAGTATTCCG_1	inf_1	567	310	120	4	506	3	23.6332	gfp-low	gfp-low	2028	494	Infected	Batch1	AM_3
CCACACTCAGAGATGC_1	inf_1	2486	1087	102	4	416	3	12.5503	gfp-low	gfp-low	2482	1087	Infected	Batch1	IM_3
CCACCATCAACTGAAA_1	inf_1	11250	3097	110	4	463	3	6.63111	gfp-low	gfp-low	2612	1367	Infected	Batch1	AM_1
CCACCATCACCGTACG_1	inf_1	3910	1655	403	4	1378	3	12.7621	gfp-low	gfp-low	2914	1632	Infected	Batch1	AM_1
CCACCATCAGTCGTTA_1	inf_1	3468	1009	714	4	1230	3	36.4475	gfp-low	gfp-low	2715	1008	Infected	Batch1	IM_4
CCACGAGAGATTGGGC_1	inf_1	10303	2587	258	4	1162	3	12.0936	gfp-low	gfp-low	2610	1154	Infected	Batch1	AM_1
CCACGAGTCCTGGGAC_1	inf_1	7526	2396	899	4	1464	3	24.3689	gfp-low	gfp-low	3024	1662	Infected	Batch1	Macrophages/T-cells
CCACGTTCAAAGACTA_1	inf_1	6113	2109	342	4	790	3	3.64796	gfp-low	gfp-low	3079	1744	Infected	Batch1	IM_2
CCACGTTGTCCACATA_1	inf_1	4182	1564	504	4	1375	3	34.5528	gfp-low	gfp-low	2932	1501	Infected	Batch1	AM_1
CCACTTGAGAGAAGGT_1	inf_1	538	331	399	4	431	3	2.41636	gfp-low	gfp-low	1748	529	Infected	Batch1	Neutrophils
CCACTTGAGGTAGACC_1	inf_1	2854	1256	559	4	1162	3	21.1983	gfp-low	gfp-low	2674	1256	Infected	Batch1	AM_1
CCACTTGCAAAGCTAA_1	inf_1	3731	1411	356	4	1092	3	19.807	gfp-low	gfp-low	2844	1388	Infected	Batch1	AM_3
CCACTTGGTGGGCTCT_1	inf_1	9865	2854	394	4	984	3	11.0796	gfp-low	gfp-low	2741	1454	Infected	Batch1	AM_1
CCATAAGCAGATACTC_1	inf_1	2884	1232	89	4	669	3	8.4258	gfp-low	gfp-low	2676	1231	Infected	Batch1	AM_3
CCCAACTCAAACACGG_1	inf_1	4290	1530	498	4	1335	3	13.1702	gfp-low	gfp-low	2899	1487	Infected	Batch1	AM_3
CCCATTGAGACAACTA_1	inf_1	5364	2005	131	4	948	3	16.6853	gfp-low	gfp-low	3094	1793	Infected	Batch1	IM_2
CCCATTGCACGGATCC_1	inf_1	13553	3224	539	4	1182	3	9.37062	gfp-low	gfp-low	2666	1283	Infected	Batch1	AM_1
CCCGAAGAGCACGTCC_1	inf_1	5193	1836	227	4	850	3	8.4922	gfp-low	gfp-low	3026	1666	Infected	Batch1	AM_1
CCCGAAGCAAGGCCTC_1	inf_1	2039	868	480	4	1126	3	30.5542	gfp-low	gfp-low	2263	868	Infected	Batch1	AM_2
CCCGAAGCAGAGCCCT_1	inf_1	9528	2778	298	4	1012	3	5.27918	gfp-low	gfp-low	2728	1418	Infected	Batch1	Macrophages/B-cells
CCCGAAGTCTCCGAGG_1	inf_1	5858	2047	302	4	1175	3	9.11574	gfp-low	gfp-low	3091	1764	Infected	Batch1	AM_1
CCCGGAAGTAATGCTC_1	inf_1	3497	1400	749	4	1362	3	26.8802	gfp-low	gfp-low	2825	1400	Infected	Batch1	AM_1
CCCGGAATCAACCCGG_1	inf_1	5631	2183	241	4	958	3	11.7386	gfp-low	gfp-low	3197	1924	Infected	Batch1	AM_1
CCCTAACAGGCGCTTC_1	inf_1	606	311	499	4	246	3	1.9802	gfp-low	gfp-low	2029	451	Infected	Batch1	AM_3
CCCTAACGTGCTAGCC_1	inf_1	1247	828	123	4	326	3	10.6656	gfp-low	gfp-low	1918	848	Infected	Batch1	Monocytes
CCCTCAACACGCGTGT_1	inf_1	650	402	420	4	344	3	1.53846	gfp-low	gfp-low	1843	552	Infected	Batch1	Neutrophils
CCCTCAAGTCAACCAT_1	inf_1	6985	2315	264	4	774	3	5.64066	gfp-low	gfp-low	3051	1744	Infected	Batch1	AM_1
CCCTCAAGTGAGTAAT_1	inf_1	12697	3098	702	4	1551	3	12.9558	gfp-low	gfp-low	2573	1258	Infected	Batch1	AM_1
CCCTCAATCTTCACAT_1	inf_1	12416	3233	330	4	1237	3	6.64465	gfp-low	gfp-low	2632	1374	Infected	Batch1	AM_1
CCCTCTCCACCGGAAA_1	inf_1	812	446	303	4	422	3	1.60099	gfp-low	gfp-low	1904	569	Infected	Batch1	Neutrophils
CCCTCTCGTACTCCCT_1	inf_1	5700	2193	261	4	951	3	15.8596	gfp-low	gfp-low	3191	1921	Infected	Batch1	AM_4
CCCTGATAGGACACTG_1	inf_1	1803	743	114	4	365	3	34.0544	gfp-low	gfp-low	2215	742	Infected	Batch1	IM_1
CCCTGATCAATGTTGC_1	inf_1	7402	2146	192	4	360	3	9.74061	gfp-low	gfp-low	3098	1515	Infected	Batch1	IM_2
CCCTGATCACGTAGAG_1	inf_1	4729	1849	534	4	1413	3	18.4606	gfp-low	gfp-low	2994	1724	Infected	Batch1	IM_2
CCCTTAGCAGCTTCGG_1	inf_1	1384	730	113	4	356	3	18.7861	gfp-low	gfp-low	2068	734	Infected	Batch1	IM_1
CCCTTAGGTAAGATCA_1	inf_1	2874	1143	406	4	675	3	36.4997	gfp-low	gfp-low	2664	1141	Infected	Batch1	AM_1
CCGAACGAGCTTTCCC_1	inf_1	4237	1949	90	3	242	3	7.19849	gfp-low	gfp-low	3066	1892	Infected	Batch1	IM_2
CCGAACGCAATCCTAG_1	inf_1	2618	1050	872	4	1213	3	35.2941	gfp-low	gfp-low	2551	1049	Infected	Batch1	AM_2
CCGAACGCAGCTAACT_1	inf_1	1194	611	354	4	1050	3	26.5494	gfp-low	gfp-low	2127	644	Infected	Batch1	AM_3
CCGAACGGTAGCGAGT_1	inf_1	2953	1253	155	4	527	3	2.13342	gfp-low	gfp-low	2697	1253	Infected	Batch1	IM_2
CCGAACGTCAGCGGAA_1	inf_1	3846	1475	677	4	1341	3	21.8669	gfp-low	gfp-low	2864	1454	Infected	Batch1	AM_1
CCGATCTAGTAATACG_1	inf_1	2675	1053	379	4	900	3	35.1776	gfp-low	gfp-low	2580	1053	Infected	Batch1	AM_1
CCGATCTGTTCGGACC_1	inf_1	3183	1174	311	4	1190	3	17.1536	gfp-low	gfp-low	2710	1173	Infected	Batch1	AM_3
CCGATCTTCTACACAG_1	inf_1	1939	1051	74	4	262	3	4.02269	gfp-low	gfp-low	2173	1049	Infected	Batch1	Monocytes
CCGATGGAGATTCGAA_1	inf_1	4319	1559	601	4	1162	3	10.0949	gfp-low	gfp-low	2903	1488	Infected	Batch1	AM_3
CCGATGGAGGCTTAGG_1	inf_1	1138	685	220	4	972	3	14.1476	gfp-low	gfp-low	2084	710	Infected	Batch1	AM_2
CCGATGGTCGACATTG_1	inf_1	11852	3013	676	4	1292	3	3.86433	gfp-low	gfp-low	2570	1261	Infected	Batch1	AM_1
CCGCAAGCAATCTCTT_1	inf_1	8270	2683	283	4	1172	3	5.34462	gfp-low	gfp-low	2941	1697	Infected	Batch1	AM_1
CCGCAAGGTATTCCGA_1	inf_1	4398	1527	489	4	1220	3	14.6885	gfp-low	gfp-low	2914	1446	Infected	Batch1	Neutrophils
CCGGGTAAGGTTGCCC_1	inf_1	772	357	440	4	363	3	2.59067	gfp-low	gfp-low	1954	501	Infected	Batch1	Neutrophils
CCGGGTACACTCATAG_1	inf_1	5146	1880	121	4	719	3	4.60552	gfp-low	gfp-low	3055	1720	Infected	Batch1	IM_2
CCGGTAGGTCCGTACG_1	inf_1	2891	1111	270	4	988	3	20.1314	gfp-low	gfp-low	2655	1111	Infected	Batch1	AM_3
CCGGTGAAGAAGTATC_1	inf_1	1094	567	159	4	337	3	29.2505	gfp-low	gfp-low	2052	656	Infected	Batch1	IM_1
CCGGTGAAGGCTAAAT_1	inf_1	6291	1935	482	4	981	3	16.5792	gfp-low	gfp-low	2988	1552	Infected	Batch1	AM_1
CCGGTGACAGTAGGAC_1	inf_1	1004	543	472	4	328	3	0.796813	gfp-low	gfp-low	2024	620	Infected	Batch1	Neutrophils
CCGGTGAGTGAGGATC_1	inf_1	4123	1783	727	4	1208	3	20.7858	gfp-low	gfp-low	3021	1721	Infected	Batch1	AM_1
CCGGTGAGTTTAGACC_1	inf_1	16166	3286	293	4	1006	3	3.15477	gfp-low	gfp-low	2668	1232	Infected	Batch1	AM_1
CCGGTGATCAGCGCGT_1	inf_1	8524	2181	401	4	1083	3	5.59596	gfp-low	gfp-low	2767	1262	Infected	Batch1	IM_3
CCGTAGGCAACTGCCG_1	inf_1	1046	500	259	4	428	3	1.62524	gfp-low	gfp-low	2044	590	Infected	Batch1	Neutrophils
CCGTAGGGTCGTGTTA_1	inf_1	6541	1860	223	4	752	3	11.0228	gfp-low	gfp-low	2952	1495	Infected	Batch1	IM_2
CCGTAGGTCCTCTCTT_1	inf_1	12194	2851	691	4	1320	3	3.49352	gfp-low	gfp-low	2574	1200	Infected	Batch1	AM_1
CCGTAGGTCTGGGCGT_1	inf_1	11558	2890	331	4	920	3	5.91798	gfp-low	gfp-low	2578	1216	Infected	Batch1	AM_4
CCGTGAGGTTTCGTAG_1	inf_1	548	302	81	4	499	2	35.5839	gfp-low	gfp-low	2018	477	Infected	Batch1	AM_2
CCGTGAGTCGCTGATA_1	inf_1	2814	1227	80	4	360	3	6.1123	gfp-low	gfp-low	2650	1225	Infected	Batch1	AM_3
CCGTTCATCGGACAAG_1	inf_1	5371	2087	325	4	1166	3	14.8203	gfp-low	gfp-low	3113	1884	Infected	Batch1	AM_1
CCTAACCAGTGTACCT_1	inf_1	7866	2281	159	4	945	3	13.0816	gfp-low	gfp-low	2958	1531	Infected	Batch1	IM_3
CCTAACCTCGCTACAA_1	inf_1	5909	2304	301	4	1229	3	5.51701	gfp-low	gfp-low	3206	2006	Infected	Batch1	AM_4
CCTAAGAAGCGAGGAG_1	inf_1	822	385	519	4	586	3	6.56934	gfp-low	gfp-low	1972	500	Infected	Batch1	Neutrophils
CCTAAGACAAGAGTGC_1	inf_1	1439	779	100	4	437	3	8.68659	gfp-low	gfp-low	2044	779	Infected	Batch1	IM_1
CCTAAGATCAAGAGTA_1	inf_1	2969	1174	378	4	1085	3	14.4156	gfp-low	gfp-low	2670	1174	Infected	Batch1	AM_1
CCTACGTTCTTAAGGC_1	inf_1	12659	3358	1234	4	1066	3	8.1444	gfp-low	gfp-low	2616	1353	Infected	Batch1	AM_1
CCTATCGAGTTCTCTT_1	inf_1	1663	852	12	3	164	3	1.50331	gfp-low	gfp-low	2148	852	Infected	Batch1	Monocytes
CCTATCGCAACAACAA_1	inf_1	7885	2369	205	4	1091	3	5.56753	gfp-low	gfp-low	2971	1578	Infected	Batch1	IM_2
CCTATCGTCCTACGGG_1	inf_1	1539	834	348	4	1170	3	12.4756	gfp-low	gfp-low	2133	834	Infected	Batch1	AM_3
CCTCAACGTAGGAGGG_1	inf_1	1064	453	232	4	742	3	31.391	gfp-low	gfp-low	2222	504	Infected	Batch1	AM_3
CCTCAACTCCATAGAC_1	inf_1	906	457	410	4	522	3	1.87638	gfp-low	gfp-low	2032	555	Infected	Batch1	Neutrophils
CCTCACAAGACCAGCA_1	inf_1	984	618	102	4	438	3	14.126	gfp-low	gfp-low	2074	680	Infected	Batch1	Monocytes
CCTCACAGTTGCCATA_1	inf_1	2690	1293	96	4	398	3	9.51673	gfp-low	gfp-low	2612	1293	Infected	Batch1	AM_1
CCTCAGTCAGCTTCGG_1	inf_1	9002	2457	548	4	1228	3	17.6405	gfp-low	gfp-low	2765	1342	Infected	Batch1	AM_1
CCTCAGTCAGTCCCGA_1	inf_1	787	402	426	4	279	3	1.27065	gfp-low	gfp-low	1960	526	Infected	Batch1	Neutrophils
CCTCATGGTTGCCGCA_1	inf_1	7203	2333	131	4	604	3	1.55491	gfp-low	gfp-low	3104	1709	Infected	Batch1	Macrophages/B-cells
CCTCATGTCAAGCGTT_1	inf_1	3925	1445	667	4	954	3	8.10191	gfp-low	gfp-low	2889	1420	Infected	Batch1	IM_2
CCTCCAACACACCAGC_1	inf_1	3687	1508	168	4	736	3	21.6436	gfp-low	gfp-low	2887	1485	Infected	Batch1	AM_1
CCTCCAAGTAACCAGG_1	inf_1	10756	2787	433	4	827	3	15.2101	gfp-low	gfp-low	2601	1168	Infected	Batch1	IM_3
CCTCCAAGTAAGTTAG_1	inf_1	6365	2085	1695	4	1477	3	20.3928	gfp-low	gfp-low	3045	1669	Infected	Batch1	AM_3
CCTCCAATCCGAACGC_1	inf_1	7068	2348	517	4	1325	3	9.56423	gfp-low	gfp-low	3084	1763	Infected	Batch1	AM_1
CCTCCAATCGTTGTTT_1	inf_1	7296	2510	663	4	1071	3	8.52522	gfp-low	gfp-low	3242	1899	Infected	Batch1	AM_4
CCTCCTCGTTGTTTGG_1	inf_1	546	313	282	4	278	3	1.8315	gfp-low	gfp-low	1849	507	Infected	Batch1	Neutrophils
CCTCCTCTCAGAGTGG_1	inf_1	907	577	89	4	276	3	5.40243	gfp-low	gfp-low	2040	634	Infected	Batch1	Monocytes
CCTCCTCTCTGTACAG_1	inf_1	861	417	148	4	1079	3	30.3136	gfp-low	gfp-low	2156	493	Infected	Batch1	AM_2
CCTCTAGCAACCAATC_1	inf_1	3650	1553	160	4	1090	3	10.4932	gfp-low	gfp-low	2878	1546	Infected	Batch1	AM_1
CCTCTAGCATGAATCC_1	inf_1	6979	2192	1017	4	1479	3	20.7909	gfp-low	gfp-low	3004	1624	Infected	Batch1	AM_1
CCTCTCCAGACCGCCT_1	inf_1	6627	2478	245	4	863	3	4.2855	gfp-low	gfp-low	3210	2022	Infected	Batch1	AM_1
CCTCTCCCATATACCG_1	inf_1	5854	2122	179	4	939	3	13.2559	gfp-low	gfp-low	3089	1816	Infected	Batch1	AM_1
CCTCTCCCATTATGCG_1	inf_1	8576	2698	199	4	905	3	4.02285	gfp-low	gfp-low	2909	1623	Infected	Batch1	AM_1
CCTGCATCAGCTTCCT_1	inf_1	4668	1434	100	4	510	3	9.87575	gfp-low	gfp-low	2942	1335	Infected	Batch1	IM_1
CCTGTTGAGCGACTTT_1	inf_1	6142	2250	284	4	1174	3	7.16379	gfp-low	gfp-low	3150	1886	Infected	Batch1	AM_4
CCTGTTGCAATCGCCG_1	inf_1	4575	1759	1668	4	1419	3	18.0546	gfp-low	gfp-low	2981	1674	Infected	Batch1	AM_1
CCTGTTGTCGCCCAGA_1	inf_1	3020	1223	795	4	1420	3	34.5695	gfp-low	gfp-low	2711	1220	Infected	Batch1	AM_4
CCTTCAGCATACCACA_1	inf_1	1143	637	250	4	352	3	18.2852	gfp-low	gfp-low	1965	722	Infected	Batch1	IM_1
CCTTCAGTCAAACCCA_1	inf_1	5541	1891	199	4	1160	3	20.5198	gfp-low	gfp-low	3056	1651	Infected	Batch1	AM_4
CCTTGTGCAACTAGAA_1	inf_1	2720	1110	811	4	1304	3	32.7574	gfp-low	gfp-low	2600	1107	Infected	Batch1	Neutrophils
CCTTGTGCACCATAAC_1	inf_1	11592	3039	570	4	1377	3	3.68357	gfp-low	gfp-low	2567	1259	Infected	Batch1	AM_1
CCTTGTGCATATCTGG_1	inf_1	6962	2566	408	4	1269	3	11.0888	gfp-low	gfp-low	3234	2016	Infected	Batch1	AM_4
CCTTGTGTCAGCTGAT_1	inf_1	6093	2300	1164	4	1285	3	14.0653	gfp-low	gfp-low	3135	1931	Infected	Batch1	AM_1
CCTTGTGTCTATCGCC_1	inf_1	1938	789	310	4	1201	3	36.4293	gfp-low	gfp-low	2257	789	Infected	Batch1	AM_2
CCTTGTGTCTTCTTCC_1	inf_1	15292	3473	412	4	1288	3	4.3356	gfp-low	gfp-low	2773	1356	Infected	Batch1	IM_2
CCTTTGGGTAGACTGG_1	inf_1	1608	848	292	4	1197	3	17.1642	gfp-low	gfp-low	2137	848	Infected	Batch1	AM_3
CCTTTGGGTGCTCGTG_1	inf_1	8373	2282	384	4	1345	3	4.98029	gfp-low	gfp-low	2826	1397	Infected	Batch1	AM_1
CCTTTGGGTGGTATGG_1	inf_1	821	489	926	4	1002	3	0.974421	gfp-low	gfp-low	1948	598	Infected	Batch1	Neutrophils
CGAAGGACACTGTTCC_1	inf_1	660	380	172	4	1022	3	21.8182	gfp-low	gfp-low	2021	506	Infected	Batch1	AM_3
CGAATTGCACCTGATA_1	inf_1	1725	962	64	4	384	3	4.63768	gfp-low	gfp-low	2109	962	Infected	Batch1	Monocytes
CGAATTGCACGACTAT_1	inf_1	1669	822	121	4	383	3	20.3715	gfp-low	gfp-low	2132	822	Infected	Batch1	IM_1
CGAATTGTCATCTACT_1	inf_1	2420	1026	244	4	1215	3	18.5124	gfp-low	gfp-low	2430	1026	Infected	Batch1	AM_1
CGAATTGTCCACCTGT_1	inf_1	6488	2235	346	4	1313	3	6.3656	gfp-low	gfp-low	3080	1779	Infected	Batch1	AM_1
CGAATTGTCCGTGTGG_1	inf_1	8708	2595	377	4	1219	3	3.74368	gfp-low	gfp-low	2799	1519	Infected	Batch1	AM_1
CGAATTGTCTTTGCGC_1	inf_1	1923	887	326	4	1274	3	23.6609	gfp-low	gfp-low	2223	886	Infected	Batch1	AM_2
CGAGAAGCATACGCAT_1	inf_1	3973	1675	862	4	1370	3	24.5406	gfp-low	gfp-low	2957	1630	Infected	Batch1	AM_4
CGAGAAGGTAACGATA_1	inf_1	10864	2678	301	4	1078	3	5.79897	gfp-low	gfp-low	2598	1166	Infected	Batch1	AM_1
CGAGGAAAGCTGTCCG_1	inf_1	5060	1685	687	4	1190	3	17.4111	gfp-low	gfp-low	2948	1509	Infected	Batch1	AM_3
CGAGGCTAGGTAAGTT_1	inf_1	3028	1025	474	4	1307	3	32.0343	gfp-low	gfp-low	2659	1025	Infected	Batch1	AM_3
CGAGGCTGTTAGGGAC_1	inf_1	6986	1999	1166	4	1237	3	24.1483	gfp-low	gfp-low	2934	1458	Infected	Batch1	AM_3
CGAGGCTTCAGGACAG_1	inf_1	16981	3282	647	4	1320	3	1.50168	gfp-low	gfp-low	2647	1269	Infected	Batch1	AM_1
CGAGTGCCAATTCTCT_1	inf_1	4838	1845	256	4	531	3	8.47458	gfp-low	gfp-low	3001	1726	Infected	Batch1	AM_1
CGAGTGCTCTAAGGAA_1	inf_1	5913	1908	1228	4	1318	3	9.47066	gfp-low	gfp-low	3022	1596	Infected	Batch1	Neutrophils
CGAGTTAAGGAATGTT_1	inf_1	6557	1931	136	4	788	3	2.6689	gfp-low	gfp-low	3018	1502	Infected	Batch1	IM_2
CGAGTTACATAAGATG_1	inf_1	3013	1288	756	4	1235	3	8.231	gfp-low	gfp-low	2731	1287	Infected	Batch1	Neutrophils
CGAGTTACATTCTCCG_1	inf_1	5355	1967	533	4	1400	3	21.1951	gfp-low	gfp-low	3071	1759	Infected	Batch1	AM_4
CGAGTTAGTCAACACT_1	inf_1	1107	643	96	3	298	3	9.66576	gfp-low	gfp-low	2055	675	Infected	Batch1	IM_1
CGATCGGCACTGAATC_1	inf_1	6314	2281	1398	4	1334	3	8.44156	gfp-low	gfp-low	3155	1862	Infected	Batch1	IM_3
CGATCGGGTCGCGGTT_1	inf_1	6681	2380	139	4	558	3	7.54378	gfp-low	gfp-low	3186	1936	Infected	Batch1	AM_4
CGATGGCGTCACTAGT_1	inf_1	1949	974	1054	4	1202	3	11.1339	gfp-low	gfp-low	2221	974	Infected	Batch1	AM_3
CGATGGCTCGTGCGAC_1	inf_1	14748	2873	1283	4	1268	3	9.0792	gfp-low	gfp-low	2624	1107	Infected	Batch1	AM_1
CGATGGCTCTTCCACG_1	inf_1	1312	595	470	4	1102	3	26.372	gfp-low	gfp-low	2183	604	Infected	Batch1	AM_2
CGCAGGTCACCACTGG_1	inf_1	1147	696	105	4	480	3	10.7236	gfp-low	gfp-low	2014	719	Infected	Batch1	Monocytes
CGCATAACAGCAGTCC_1	inf_1	788	416	323	4	884	3	24.4924	gfp-low	gfp-low	2081	508	Infected	Batch1	AM_2
CGCATAAGTCCAGTTA_1	inf_1	5655	1889	192	4	627	3	11.5827	gfp-low	gfp-low	3098	1670	Infected	Batch1	AM_1
CGCATGGAGAGGTCAC_1	inf_1	1154	656	142	4	416	3	14.5581	gfp-low	gfp-low	2083	679	Infected	Batch1	IM_4
CGCATGGGTATACAGA_1	inf_1	1211	636	340	4	1200	3	28.5714	gfp-low	gfp-low	2106	668	Infected	Batch1	AM_2
CGCCAGACAATCTAGC_1	inf_1	9834	2466	317	4	1061	3	11.2569	gfp-low	gfp-low	2621	1184	Infected	Batch1	IM_2
CGCCATTAGACCATTC_1	inf_1	13647	3172	386	4	1113	3	4.72631	gfp-low	gfp-low	2602	1237	Infected	Batch1	AM_1
CGCCATTAGTATTGCC_1	inf_1	11414	2739	303	4	1057	3	3.46066	gfp-low	gfp-low	2528	1109	Infected	Batch1	AM_1
CGCCATTCAAGTCCCG_1	inf_1	7415	1647	338	4	1285	3	19.7572	gfp-low	gfp-low	2792	1086	Infected	Batch1	IM_3
CGCCATTTCACACCCT_1	inf_1	1835	731	114	4	257	3	29.7548	gfp-low	gfp-low	2195	729	Infected	Batch1	IM_1
CGGAACCTCAAGAGTA_1	inf_1	3464	1274	106	4	510	2	8.16975	gfp-low	gfp-low	2767	1273	Infected	Batch1	AM_3
CGGAACCTCATTATCC_1	inf_1	1651	809	277	4	1035	3	9.6911	gfp-low	gfp-low	2159	809	Infected	Batch1	AM_3
CGGAATTAGTATTGCC_1	inf_1	1590	721	148	4	670	3	22.7044	gfp-low	gfp-low	2124	722	Infected	Batch1	IM_1
CGGAATTGTACGATTC_1	inf_1	652	388	271	4	235	3	1.68712	gfp-low	gfp-low	1860	544	Infected	Batch1	Neutrophils
CGGAATTGTATTCTCT_1	inf_1	765	403	368	4	1006	3	29.5425	gfp-low	gfp-low	2098	515	Infected	Batch1	AM_3
CGGAATTGTTATAGCC_1	inf_1	6098	2034	634	4	1226	3	15.8741	gfp-low	gfp-low	3038	1681	Infected	Batch1	AM_1
CGGACACCAGCACGAA_1	inf_1	8626	2397	1080	4	1129	3	6.86297	gfp-low	gfp-low	2818	1412	Infected	Batch1	AM_1
CGGACACCATATGAAG_1	inf_1	6300	2010	898	4	1261	3	11.1905	gfp-low	gfp-low	3030	1650	Infected	Batch1	Macrophages/T-cells
CGGAGAAAGTAGCATA_1	inf_1	841	559	80	4	221	3	13.1986	gfp-low	gfp-low	1994	659	Infected	Batch1	Monocytes
CGGAGAACACTGGATT_1	inf_1	7530	2083	190	4	1056	3	4.99336	gfp-low	gfp-low	2919	1451	Infected	Batch1	IM_3
CGGCAGTAGAATTCAG_1	inf_1	6344	2175	254	4	1187	3	4.60277	gfp-low	gfp-low	3126	1786	Infected	Batch1	AM_1
CGGCAGTAGCCAGAGT_1	inf_1	4244	1423	191	4	366	3	7.09237	gfp-low	gfp-low	2910	1370	Infected	Batch1	AM_4
CGGCAGTCAAGTCCAT_1	inf_1	8426	2389	826	4	1175	3	8.84168	gfp-low	gfp-low	2854	1468	Infected	Batch1	AM_1
CGGCAGTCAAGTGCTT_1	inf_1	565	317	332	4	325	3	2.12389	gfp-low	gfp-low	1747	514	Infected	Batch1	Neutrophils
CGGCAGTGTACGCGTC_1	inf_1	16337	3297	462	4	1056	3	3.80731	gfp-low	gfp-low	2723	1358	Infected	Batch1	AM_1
CGGCAGTGTATCCCAA_1	inf_1	8298	2574	995	4	1341	3	9.12268	gfp-low	gfp-low	2950	1652	Infected	Batch1	AM_1
CGGCAGTGTGCGGCTT_1	inf_1	5513	1470	162	4	645	3	9.43225	gfp-low	gfp-low	2884	1233	Infected	Batch1	IM_3
CGGCAGTTCTTCACGC_1	inf_1	1738	836	287	4	330	3	0.920598	gfp-low	gfp-low	2169	834	Infected	Batch1	Neutrophils
CGGGACTAGACATAAC_1	inf_1	530	339	97	4	362	3	16.4151	gfp-low	gfp-low	1880	514	Infected	Batch1	Monocytes
CGGGACTTCGGCAGTC_1	inf_1	1138	662	94	4	386	3	6.32689	gfp-low	gfp-low	2065	679	Infected	Batch1	AM_4
CGGGCATTCACAGTGT_1	inf_1	1779	676	621	4	848	3	0.786959	gfp-low	gfp-low	2180	676	Infected	Batch1	Neutrophils
CGGGTCACAGCGATTT_1	inf_1	4011	1356	265	4	1056	3	23.0366	gfp-low	gfp-low	2861	1315	Infected	Batch1	AM_1
CGGGTCAGTAATTGGA_1	inf_1	9317	2401	208	4	886	3	9.2841	gfp-low	gfp-low	2808	1311	Infected	Batch1	IM_2
CGGGTCAGTCGAGTTT_1	inf_1	3954	1630	357	4	1014	3	8.62418	gfp-low	gfp-low	2909	1600	Infected	Batch1	AM_1
CGGGTCAGTTCCACGG_1	inf_1	4493	1799	1608	4	1275	3	21.0995	gfp-low	gfp-low	2977	1701	Infected	Batch1	AM_4
CGGGTCATCCGCGAGT_1	inf_1	5324	1838	147	4	618	3	11.0819	gfp-low	gfp-low	3010	1633	Infected	Batch1	AM_1
CGGGTGTAGCTCAGAG_1	inf_1	1483	790	125	4	424	3	11.6655	gfp-low	gfp-low	2088	786	Infected	Batch1	IM_1
CGGGTGTTCATATGGC_1	inf_1	10993	2393	318	4	640	3	4.47558	gfp-low	gfp-low	2500	970	Infected	Batch1	AM_1
CGGGTGTTCGTCCTTG_1	inf_1	4002	1806	278	4	1152	3	10.9445	gfp-low	gfp-low	3008	1774	Infected	Batch1	Monocytes
CGGTCAGCACTTCATT_1	inf_1	8937	2696	245	4	990	3	6.72485	gfp-low	gfp-low	2822	1538	Infected	Batch1	AM_1
CGGTCAGCAGCAGTGA_1	inf_1	3779	1639	733	4	1289	3	13.0193	gfp-low	gfp-low	2917	1622	Infected	Batch1	AM_1
CGGTCAGCATCCGTTC_1	inf_1	1038	625	32	4	196	3	3.46821	gfp-low	gfp-low	2094	667	Infected	Batch1	IM_4
CGGTCAGGTGCGTCGT_1	inf_1	4001	1530	101	4	393	3	9.42264	gfp-low	gfp-low	2882	1499	Infected	Batch1	IM_3
CGGTCAGTCACTACGA_1	inf_1	2026	906	567	4	999	3	17.2261	gfp-low	gfp-low	2255	906	Infected	Batch1	AM_3
CGTAAGTGTGCGACAA_1	inf_1	3013	1135	180	4	200	3	4.28145	gfp-low	gfp-low	2704	1135	Infected	Batch1	IM_2
CGTAATGCAGGACTTT_1	inf_1	3101	1188	402	4	1190	3	14.3502	gfp-low	gfp-low	2717	1188	Infected	Batch1	AM_3
CGTAATGGTTTGCCGG_1	inf_1	2483	1070	853	4	783	3	0.966573	gfp-low	gfp-low	2481	1069	Infected	Batch1	Neutrophils
CGTAGTACAATTGAAG_1	inf_1	925	531	494	4	452	3	1.40541	gfp-low	gfp-low	2064	608	Infected	Batch1	Neutrophils
CGTAGTAGTAACCCTA_1	inf_1	3500	1310	1334	4	1279	3	33.1714	gfp-low	gfp-low	2815	1306	Infected	Batch1	AM_1
CGTAGTAGTAACTTCG_1	inf_1	1597	770	268	4	1261	3	31.8723	gfp-low	gfp-low	2130	769	Infected	Batch1	AM_2
CGTAGTATCATCTACT_1	inf_1	3636	1462	350	4	1221	3	13.1188	gfp-low	gfp-low	2852	1456	Infected	Batch1	AM_3
CGTAGTATCTCTAAGG_1	inf_1	9161	2627	407	4	1197	3	2.18317	gfp-low	gfp-low	2751	1431	Infected	Batch1	AM_1
CGTCAAAAGTAATACG_1	inf_1	5988	1915	397	4	1344	3	15.3474	gfp-low	gfp-low	3003	1619	Infected	Batch1	IM_1
CGTCAAAGTACCAATC_1	inf_1	6300	1758	1806	4	1379	3	22.5556	gfp-low	gfp-low	2892	1372	Infected	Batch1	AM_3
CGTCCATAGAGGGTGG_1	inf_1	829	468	286	4	214	3	2.41255	gfp-low	gfp-low	1984	585	Infected	Batch1	Neutrophils
CGTCCATAGGTGCTAG_1	inf_1	4164	1596	430	4	1098	3	22.2622	gfp-low	gfp-low	2915	1548	Infected	Batch1	AM_1
CGTCCATGTAAGTAGT_1	inf_1	7566	2324	312	4	1259	3	6.19878	gfp-low	gfp-low	2967	1631	Infected	Batch1	AM_1
CGTCCATGTAGTCTGT_1	inf_1	11008	2798	576	4	1126	3	3.79724	gfp-low	gfp-low	2622	1241	Infected	Batch1	Macrophages/B-cells
CGTCCATGTTCGAGCC_1	inf_1	1925	831	468	4	1126	3	34.5974	gfp-low	gfp-low	2241	831	Infected	Batch1	AM_2
CGTCCATGTTCTTGCC_1	inf_1	2854	1156	241	4	828	3	16.0827	gfp-low	gfp-low	2665	1154	Infected	Batch1	IM_1
CGTCCATGTTGGCCGT_1	inf_1	573	289	640	4	459	3	1.22164	gfp-low	gfp-low	1793	478	Infected	Batch1	Neutrophils
CGTGAATTCCATAGAC_1	inf_1	2628	1122	101	4	992	2	4.10959	gfp-low	gfp-low	2568	1122	Infected	Batch1	AM_3
CGTGAATTCCTGGGTG_1	inf_1	530	358	159	4	385	3	0.943396	gfp-low	gfp-low	1766	557	Infected	Batch1	Neutrophils
CGTGATACATATACCG_1	inf_1	5608	1679	175	4	782	3	6.61555	gfp-low	gfp-low	2997	1453	Infected	Batch1	IM_2
CGTGCTTCAATAAGGT_1	inf_1	4383	1640	273	4	1340	3	13.963	gfp-low	gfp-low	2943	1558	Infected	Batch1	AM_1
CGTGCTTGTCTCAGAT_1	inf_1	4041	1497	403	4	1204	3	21.9748	gfp-low	gfp-low	2876	1449	Infected	Batch1	AM_4
CGTTAGAAGTGATCGG_1	inf_1	1682	655	1323	4	1308	3	33.3532	gfp-low	gfp-low	2251	655	Infected	Batch1	AM_2
CGTTCTGCAACAGATA_1	inf_1	630	359	215	4	410	3	2.22222	gfp-low	gfp-low	1853	514	Infected	Batch1	Neutrophils
CGTTCTGTCTGCCTGT_1	inf_1	3015	1400	371	4	1136	3	9.4859	gfp-low	gfp-low	2732	1400	Infected	Batch1	AM_1
CGTTGGGAGTCTAGCT_1	inf_1	7252	2185	1702	4	1378	3	13.4859	gfp-low	gfp-low	2980	1558	Infected	Batch1	AM_1
CGTTGGGTCTGTAAGC_1	inf_1	969	521	202	4	465	3	18.6791	gfp-low	gfp-low	2171	572	Infected	Batch1	AM_2
CTAACCCAGGTGCCAA_1	inf_1	1427	748	29	4	292	3	6.23686	gfp-low	gfp-low	2123	747	Infected	Batch1	AM_3
CTAACCCCATACAGGG_1	inf_1	10921	2735	795	4	1257	3	2.93013	gfp-low	gfp-low	2547	1176	Infected	Batch1	AM_1
CTAACCCGTGTTAAAG_1	inf_1	4965	1839	522	4	946	3	5.88117	gfp-low	gfp-low	2970	1667	Infected	Batch1	AM_4
CTAACTTGTACAATAG_1	inf_1	6265	2095	116	4	571	3	8.4597	gfp-low	gfp-low	3049	1704	Infected	Batch1	AM_1
CTAAGTGCACATCATG_1	inf_1	1866	827	121	4	412	3	21.865	gfp-low	gfp-low	2174	827	Infected	Batch1	IM_1
CTAAGTGCACTAACCA_1	inf_1	1669	658	329	4	323	3	0.539245	gfp-low	gfp-low	2141	657	Infected	Batch1	Neutrophils
CTACAGAAGAGCCGTA_1	inf_1	16109	3416	370	4	1006	3	2.35272	gfp-low	gfp-low	2719	1310	Infected	Batch1	AM_1
CTACAGAGTAGATCGG_1	inf_1	5534	1738	644	4	1257	3	24.1597	gfp-low	gfp-low	2954	1481	Infected	Batch1	AM_3
CTACAGAGTAGGAGTC_1	inf_1	5386	1831	719	4	1226	3	30.0223	gfp-low	gfp-low	3007	1607	Infected	Batch1	AM_1
CTACCCAAGTAACAGT_1	inf_1	9658	2225	94	4	231	3	3.99669	gfp-low	gfp-low	2610	1009	Infected	Batch1	IM_3
CTACCTGTCCTATTTG_1	inf_1	7957	2433	712	4	1303	3	19.9824	gfp-low	gfp-low	2964	1619	Infected	Batch1	AM_1
CTACTATCATGGAACG_1	inf_1	3705	1194	181	4	689	3	7.77328	gfp-low	gfp-low	2820	1174	Infected	Batch1	IM_1
CTAGACAGTTAGAGAT_1	inf_1	709	464	170	4	635	3	15.7969	gfp-low	gfp-low	1948	588	Infected	Batch1	AM_2
CTAGACATCGTTTACT_1	inf_1	3458	1468	733	4	1227	3	16.5992	gfp-low	gfp-low	2847	1466	Infected	Batch1	AM_1
CTAGACATCTGATGGT_1	inf_1	999	472	418	4	329	3	1.5015	gfp-low	gfp-low	1993	561	Infected	Batch1	Neutrophils
CTAGGTAGTCAGACTT_1	inf_1	10073	2544	591	4	1155	3	7.05847	gfp-low	gfp-low	2582	1136	Infected	Batch1	AM_1
CTAGGTATCAGGTGTT_1	inf_1	7861	2285	245	4	746	3	6.72942	gfp-low	gfp-low	2971	1544	Infected	Batch1	AM_1
CTAGGTATCGTGGTAT_1	inf_1	5402	1912	273	4	1169	3	3.29508	gfp-low	gfp-low	3035	1711	Infected	Batch1	AM_1
CTATAGGAGACGTCGA_1	inf_1	3404	1169	557	4	987	3	14.7767	gfp-low	gfp-low	2755	1169	Infected	Batch1	AM_3
CTATAGGTCATGTCAG_1	inf_1	2468	1177	86	4	328	3	5.26742	gfp-low	gfp-low	2468	1177	Infected	Batch1	Monocytes
CTATCCGAGGATACAT_1	inf_1	2986	1202	600	4	1346	3	24.8493	gfp-low	gfp-low	2686	1202	Infected	Batch1	AM_3
CTATCTAAGATGACCG_1	inf_1	867	498	946	4	777	3	1.7301	gfp-low	gfp-low	1958	594	Infected	Batch1	Neutrophils
CTATCTAAGCAATTCC_1	inf_1	3821	1603	123	4	670	3	8.87202	gfp-low	gfp-low	2934	1584	Infected	Batch1	IM_1
CTATCTAGTCTCAAGT_1	inf_1	1121	655	707	4	1196	3	22.5691	gfp-low	gfp-low	2059	698	Infected	Batch1	AM_2
CTATCTATCAGTGTCA_1	inf_1	550	323	362	4	883	3	23.8182	gfp-low	gfp-low	1922	508	Infected	Batch1	AM_3
CTCAACCTCCAGCTCT_1	inf_1	2317	820	92	4	262	3	0.388433	gfp-low	gfp-low	2383	819	Infected	Batch1	AM_3
CTCAACCTCGCAGTTA_1	inf_1	1233	637	260	4	274	3	0.648824	gfp-low	gfp-low	1992	680	Infected	Batch1	Neutrophils
CTCAAGACAGCGTGAA_1	inf_1	4814	1747	1309	4	1375	3	18.7786	gfp-low	gfp-low	2956	1616	Infected	Batch1	AM_1
CTCAAGACATTGTGCA_1	inf_1	2553	1202	275	4	1250	3	17.0388	gfp-low	gfp-low	2527	1202	Infected	Batch1	AM_3
CTCACTGGTACAGGTG_1	inf_1	3353	1205	394	4	1251	3	30.331	gfp-low	gfp-low	2766	1205	Infected	Batch1	AM_1
CTCACTGGTGTTCGAT_1	inf_1	2293	955	585	4	1018	3	33.9294	gfp-low	gfp-low	2365	954	Infected	Batch1	Neutrophils
CTCACTGTCTGAGATC_1	inf_1	4200	1507	1631	4	1482	3	21.7619	gfp-low	gfp-low	2907	1465	Infected	Batch1	AM_1
CTCAGAAAGAATAACC_1	inf_1	1538	645	195	4	1197	3	33.6151	gfp-low	gfp-low	2199	645	Infected	Batch1	AM_4
CTCAGAAAGTATGAAC_1	inf_1	2938	1214	288	4	1287	3	19.9796	gfp-low	gfp-low	2670	1214	Infected	Batch1	AM_3
CTCAGAACAAGTCATC_1	inf_1	1031	572	82	4	149	3	0.581959	gfp-low	gfp-low	2123	611	Infected	Batch1	AM_4
CTCAGAACAAGTCCAT_1	inf_1	10508	2803	300	4	1221	3	10.0019	gfp-low	gfp-low	2640	1253	Infected	Batch1	AM_1
CTCAGAAGTGCTCGTG_1	inf_1	4544	1373	326	4	1270	3	25.9683	gfp-low	gfp-low	2852	1278	Infected	Batch1	AM_3
CTCAGGGTCAGTCAGT_1	inf_1	2729	1175	292	4	1106	3	10.6999	gfp-low	gfp-low	2619	1174	Infected	Batch1	AM_3
CTCAGTCAGATGCTTC_1	inf_1	9920	2835	629	4	1217	3	7.33871	gfp-low	gfp-low	2686	1362	Infected	Batch1	Macrophages/B-cells
CTCATGCCATACCGTA_1	inf_1	16398	3103	114	4	801	3	2.32345	gfp-low	gfp-low	3036	1225	Infected	Batch1	DC
CTCATGCGTTACGCCG_1	inf_1	3866	1569	242	4	776	3	9.88101	gfp-low	gfp-low	2907	1549	Infected	Batch1	AM_1
CTCATGCTCCAGCCTT_1	inf_1	911	628	75	4	161	3	6.69594	gfp-low	gfp-low	1979	728	Infected	Batch1	Monocytes
CTCATGCTCCTCTCTT_1	inf_1	3714	1558	535	4	1146	3	6.32741	gfp-low	gfp-low	2885	1537	Infected	Batch1	AM_3
CTCATGCTCTCGCGTT_1	inf_1	3175	1390	199	4	755	3	13.2283	gfp-low	gfp-low	2771	1389	Infected	Batch1	AM_1
CTCATTACAAGTTCGT_1	inf_1	1756	949	99	4	349	3	20.3303	gfp-low	gfp-low	2131	949	Infected	Batch1	IM_1
CTCCAACCACCCAAGC_1	inf_1	1022	528	744	4	908	3	2.15264	gfp-low	gfp-low	2041	612	Infected	Batch1	Neutrophils
CTCCAACTCGCAAGAG_1	inf_1	6662	1974	2415	4	1597	3	25.0525	gfp-low	gfp-low	2963	1494	Infected	Batch1	AM_1
CTCCAACTCTAGTGAC_1	inf_1	655	414	429	4	534	3	2.59542	gfp-low	gfp-low	1852	566	Infected	Batch1	Neutrophils
CTCCACACAGTTGTTG_1	inf_1	3841	1475	230	4	1019	3	27.9094	gfp-low	gfp-low	2880	1446	Infected	Batch1	AM_1
CTCCACAGTCGGTACC_1	inf_1	2081	863	103	4	515	3	17.0591	gfp-low	gfp-low	2270	861	Infected	Batch1	IM_1
CTCCATGAGCACCAGA_1	inf_1	5689	1872	405	4	1134	3	11.4783	gfp-low	gfp-low	3010	1594	Infected	Batch1	AM_1
CTCCATGAGGCACAAC_1	inf_1	8393	2597	378	4	1214	3	5.5165	gfp-low	gfp-low	2936	1656	Infected	Batch1	AM_1
CTCCATGGTACACGCC_1	inf_1	2752	1204	457	4	1289	3	13.2267	gfp-low	gfp-low	2632	1204	Infected	Batch1	AM_3
CTCCCAAAGAGAGGGC_1	inf_1	1987	1003	163	4	733	3	22.7479	gfp-low	gfp-low	2205	1002	Infected	Batch1	IM_1
CTCCCAAAGGATTTAG_1	inf_1	3686	1508	344	4	1191	3	13.4563	gfp-low	gfp-low	2879	1502	Infected	Batch1	AM_1
CTCCCAAAGGGAGGGT_1	inf_1	10249	2598	1336	4	1262	3	13.9526	gfp-low	gfp-low	2585	1182	Infected	Batch1	AM_1
CTCCCAACACTACTTT_1	inf_1	6235	2237	743	4	1236	3	13.6648	gfp-low	gfp-low	3137	1863	Infected	Batch1	AM_1
CTCCCAATCAAGTGTC_1	inf_1	7939	1986	455	4	1316	3	6.82706	gfp-low	gfp-low	2828	1275	Infected	Batch1	AM_1
CTCCCTCAGCAACTCT_1	inf_1	2192	1093	737	4	1109	3	14.6442	gfp-low	gfp-low	2296	1091	Infected	Batch1	AM_3
CTCCCTCCACTGCATA_1	inf_1	3449	1522	136	4	583	3	10.2059	gfp-low	gfp-low	2847	1522	Infected	Batch1	AM_3
CTCCCTCGTTAAGACA_1	inf_1	766	366	475	4	340	3	1.30548	gfp-low	gfp-low	1880	501	Infected	Batch1	Neutrophils
CTCCCTCTCTTACCGC_1	inf_1	2651	1095	124	4	315	3	9.65673	gfp-low	gfp-low	2581	1094	Infected	Batch1	IM_2
CTCCGATGTAACACCT_1	inf_1	4672	1848	701	4	1074	3	15.8604	gfp-low	gfp-low	2982	1726	Infected	Batch1	AM_1
CTCCTCCGTGGCCACT_1	inf_1	1106	551	140	4	326	3	28.8427	gfp-low	gfp-low	2041	632	Infected	Batch1	IM_1
CTCCTTTCAACGGCTC_1	inf_1	7222	2365	139	4	728	3	7.83716	gfp-low	gfp-low	3080	1777	Infected	Batch1	AM_1
CTCCTTTTCCTAGAGT_1	inf_1	5515	1911	117	4	1024	3	6.3282	gfp-low	gfp-low	3055	1702	Infected	Batch1	AM_1
CTCCTTTTCGGCATTA_1	inf_1	5277	1427	2314	4	1281	3	39.0942	gfp-low	gfp-low	2872	1231	Infected	Batch1	AM_3
CTCCTTTTCGTGGGTC_1	inf_1	4787	1811	553	4	1232	3	11.3223	gfp-low	gfp-low	3017	1681	Infected	Batch1	AM_1
CTCTCAGAGATGATTG_1	inf_1	2761	1208	220	4	906	3	10.4672	gfp-low	gfp-low	2618	1207	Infected	Batch1	AM_3
CTCTCAGGTTGCGAAG_1	inf_1	1016	642	138	4	223	3	0.787402	gfp-low	gfp-low	2029	702	Infected	Batch1	Neutrophils
CTCTCAGTCAGATGCT_1	inf_1	911	551	257	4	237	3	1.09769	gfp-low	gfp-low	2066	637	Infected	Batch1	Neutrophils
CTCTCGAGTAGCTGAG_1	inf_1	2239	1035	381	4	988	3	20.5895	gfp-low	gfp-low	2322	1034	Infected	Batch1	AM_1
CTCTCGAGTCGTGCCA_1	inf_1	5709	1759	2849	4	1453	3	19.6006	gfp-low	gfp-low	2996	1529	Infected	Batch1	AM_1
CTCTCGATCAACCGAT_1	inf_1	1768	1010	98	4	419	3	3.50679	gfp-low	gfp-low	2092	1010	Infected	Batch1	IM_1
CTCTGGTCAGAATTCC_1	inf_1	5813	2099	458	4	1074	3	12.5581	gfp-low	gfp-low	3105	1811	Infected	Batch1	AM_1
CTGAATGGTGCTATTG_1	inf_1	5081	1822	213	4	1139	3	5.60913	gfp-low	gfp-low	3012	1666	Infected	Batch1	AM_1
CTGAATGTCAAACCTG_1	inf_1	4387	1852	518	4	1301	3	13.1753	gfp-low	gfp-low	3001	1762	Infected	Batch1	AM_4
CTGAATGTCGGAATTC_1	inf_1	1749	684	656	4	1025	3	32.0755	gfp-low	gfp-low	2240	683	Infected	Batch1	AM_3
CTGAGCGAGCCTAACT_1	inf_1	1604	689	210	4	886	3	12.2195	gfp-low	gfp-low	2185	689	Infected	Batch1	AM_3
CTGAGCGCATTGCCGG_1	inf_1	9191	2806	127	4	448	3	9.26994	gfp-low	gfp-low	2768	1476	Infected	Batch1	AM_1
CTGAGGCAGGCATCTT_1	inf_1	1848	756	852	4	1196	3	25.3788	gfp-low	gfp-low	2233	756	Infected	Batch1	AM_3
CTGAGGCGTCGACTTA_1	inf_1	4327	1630	959	4	1044	3	13.4042	gfp-low	gfp-low	2938	1558	Infected	Batch1	Neutrophils
CTGAGGCTCGGCGATC_1	inf_1	9103	2730	694	4	1094	3	6.66813	gfp-low	gfp-low	2810	1507	Infected	Batch1	AM_4
CTGATCCGTATCGGTT_1	inf_1	4057	1603	380	4	1127	3	16.6872	gfp-low	gfp-low	2886	1557	Infected	Batch1	AM_4
CTGATCCTCTAGCAAC_1	inf_1	4124	1685	451	4	1179	3	13.7245	gfp-low	gfp-low	2936	1645	Infected	Batch1	AM_1
CTGCAGGAGACCATGG_1	inf_1	4169	1204	2040	4	1352	3	24.5143	gfp-low	gfp-low	2862	1140	Infected	Batch1	Neutrophils
CTGCAGGCACCAAAGG_1	inf_1	3924	1442	538	4	1176	3	19.7757	gfp-low	gfp-low	2866	1415	Infected	Batch1	IM_3
CTGCAGGCACCGTGAC_1	inf_1	2989	1319	753	4	1273	3	20.5085	gfp-low	gfp-low	2711	1315	Infected	Batch1	Macrophages/B-cells
CTGCATCAGAAATGGG_1	inf_1	1746	878	178	4	793	3	9.85109	gfp-low	gfp-low	2170	878	Infected	Batch1	AM_3
CTGCATCAGCGATGGT_1	inf_1	819	597	84	4	188	3	6.34921	gfp-low	gfp-low	1901	705	Infected	Batch1	Monocytes
CTGCATCCACAAGTGG_1	inf_1	2403	968	131	4	393	3	22.0141	gfp-low	gfp-low	2417	968	Infected	Batch1	IM_1
CTGCATCGTAGTCGGA_1	inf_1	5809	1769	323	4	1149	3	16.0613	gfp-low	gfp-low	2963	1498	Infected	Batch1	AM_1
CTGCATCTCCTTTGAT_1	inf_1	1515	641	756	4	1322	3	38.0198	gfp-low	gfp-low	2184	641	Infected	Batch1	AM_4
CTGCCTACAGAACATA_1	inf_1	3127	1299	485	4	964	3	25.9994	gfp-low	gfp-low	2747	1299	Infected	Batch1	AM_1
CTGCCTACAGTCGCAC_1	inf_1	9610	2577	391	4	689	3	9.40687	gfp-low	gfp-low	2670	1288	Infected	Batch1	AM_1
CTGCCTAGTTGCTCGG_1	inf_1	2565	1195	285	4	635	3	11.6179	gfp-low	gfp-low	2542	1195	Infected	Batch1	Neutrophils
CTGCGAGAGAGACAAG_1	inf_1	11684	2738	675	4	1238	3	1.80589	gfp-low	gfp-low	2529	1111	Infected	Batch1	AM_1
CTGCGAGGTCATGACT_1	inf_1	939	479	784	4	1307	3	10.6496	gfp-low	gfp-low	2214	529	Infected	Batch1	AM_3
CTGCGAGTCAGTGATC_1	inf_1	2638	1150	696	4	1175	3	21.3419	gfp-low	gfp-low	2576	1149	Infected	Batch1	AM_3
CTGCTCAAGTACGAGC_1	inf_1	2073	975	686	4	1132	3	23.1066	gfp-low	gfp-low	2265	974	Infected	Batch1	AM_4
CTGCTCACATGGAAGC_1	inf_1	10254	2995	1427	4	1556	3	19.017	gfp-low	gfp-low	2638	1385	Infected	Batch1	AM_4
CTGCTCATCCTCAGAA_1	inf_1	14199	3011	466	4	1213	3	4.04958	gfp-low	gfp-low	2562	1155	Infected	Batch1	AM_1
CTGGACGGTACGAGCA_1	inf_1	3688	1459	113	4	264	3	3.71475	gfp-low	gfp-low	2891	1454	Infected	Batch1	Monocytes
CTGGACGTCCTAGCGG_1	inf_1	1902	884	506	4	1229	3	30.8097	gfp-low	gfp-low	2198	884	Infected	Batch1	AM_1
CTGGCAGCAAAGGCAC_1	inf_1	1098	526	210	4	329	3	1.54827	gfp-low	gfp-low	2034	576	Infected	Batch1	Neutrophils
CTGGCAGCATAGGTAA_1	inf_1	1587	891	339	4	563	3	3.96975	gfp-low	gfp-low	2046	890	Infected	Batch1	Neutrophils
CTGGTCTTCCTCTCGA_1	inf_1	2378	1166	291	4	894	3	20.8579	gfp-low	gfp-low	2397	1163	Infected	Batch1	AM_3
CTGTACCCACCTGCTT_1	inf_1	942	454	190	4	544	3	39.5966	gfp-low	gfp-low	2220	534	Infected	Batch1	AM_2
CTGTACCGTGGCTTGC_1	inf_1	8058	2370	942	4	983	3	10.8836	gfp-low	gfp-low	2910	1527	Infected	Batch1	AM_1
CTGTACCGTTTAGACC_1	inf_1	1353	670	407	4	535	3	1.55211	gfp-low	gfp-low	2023	683	Infected	Batch1	Neutrophils
CTGTACCTCGGAGTGA_1	inf_1	651	405	246	4	331	3	15.9754	gfp-low	gfp-low	1845	587	Infected	Batch1	IM_1
CTGTAGACAGAACTTC_1	inf_1	12683	3072	378	4	946	3	4.3444	gfp-low	gfp-low	2609	1282	Infected	Batch1	AM_1
CTGTAGATCGTGCAGC_1	inf_1	2712	1352	400	4	951	3	12.7212	gfp-low	gfp-low	2625	1351	Infected	Batch1	AM_1
CTGTATTGTGAACCGA_1	inf_1	7020	2377	731	4	1273	3	11.6239	gfp-low	gfp-low	3100	1804	Infected	Batch1	AM_1
CTGTCGTAGGTGGTTG_1	inf_1	7552	2397	276	4	1149	3	6.92532	gfp-low	gfp-low	3029	1719	Infected	Batch1	AM_1
CTGTCGTTCAACTGGT_1	inf_1	1428	587	126	4	514	3	19.8179	gfp-low	gfp-low	2148	588	Infected	Batch1	IM_1
CTGTCGTTCTCATTTG_1	inf_1	2248	1131	62	4	370	3	1.86833	gfp-low	gfp-low	2321	1131	Infected	Batch1	Monocytes
CTGTGAAAGGGTCACA_1	inf_1	2805	1203	601	4	1228	3	21.1052	gfp-low	gfp-low	2650	1203	Infected	Batch1	AM_1
CTTACCGTCGACTCCT_1	inf_1	4211	1531	134	4	598	3	11.0663	gfp-low	gfp-low	2916	1493	Infected	Batch1	AM_3
CTTAGGACATAACTCG_1	inf_1	558	283	92	4	184	3	2.86738	gfp-low	gfp-low	2069	445	Infected	Batch1	AM_3
CTTAGGATCTGGACCG_1	inf_1	1122	524	520	4	420	3	1.6934	gfp-low	gfp-low	2060	584	Infected	Batch1	Neutrophils
CTTCAATAGAGAAGGT_1	inf_1	11079	3243	947	4	1344	3	8.55673	gfp-low	gfp-low	2624	1430	Infected	Batch1	AM_4
CTTCAATCAAGTACCT_1	inf_1	9077	2449	309	4	970	3	10.4991	gfp-low	gfp-low	3007	1375	Infected	Batch1	AM_1
CTTCAATTCTCGCTTG_1	inf_1	1536	784	179	4	916	3	20.8984	gfp-low	gfp-low	2129	785	Infected	Batch1	AM_2
CTTCCGACATCGATGT_1	inf_1	1507	781	212	4	904	3	11.347	gfp-low	gfp-low	2115	781	Infected	Batch1	AM_3
CTTCCGAGTAACAGGC_1	inf_1	4112	1521	447	4	1107	3	19.285	gfp-low	gfp-low	2897	1478	Infected	Batch1	AM_1
CTTCCGAGTCACGACC_1	inf_1	4596	1451	281	4	1095	3	23.7163	gfp-low	gfp-low	2889	1359	Infected	Batch1	IM_1
CTTCCGATCACCATGA_1	inf_1	12040	2901	376	4	1270	3	7.66611	gfp-low	gfp-low	2573	1173	Infected	Batch1	IM_2
CTTCCTTAGAAGCCTG_1	inf_1	902	491	47	4	416	3	30.9313	gfp-low	gfp-low	2120	596	Infected	Batch1	AM_2
CTTCGGTCAAGACAAT_1	inf_1	12404	3459	323	4	1243	3	2.46695	gfp-low	gfp-low	2649	1459	Infected	Batch1	AM_1
CTTCGGTCATACACCA_1	inf_1	2252	813	1322	4	1503	3	37.833	gfp-low	gfp-low	2364	812	Infected	Batch1	AM_3
CTTCGGTCATTGAGCT_1	inf_1	780	365	770	4	587	3	9.10256	gfp-low	gfp-low	1981	492	Infected	Batch1	Neutrophils
CTTCGGTTCGCTGATA_1	inf_1	8389	2534	2083	4	1346	3	7.28335	gfp-low	gfp-low	2878	1584	Infected	Batch1	AM_1
CTTCTAACACAATCTG_1	inf_1	7060	2237	162	4	845	3	9.74504	gfp-low	gfp-low	3035	1651	Infected	Batch1	IM_2
CTTCTAACAGCGTTGC_1	inf_1	2064	1147	137	4	538	3	4.84496	gfp-low	gfp-low	2223	1147	Infected	Batch1	AM_2
CTTCTAAGTACTCGAT_1	inf_1	5770	1982	330	4	637	3	6.96707	gfp-low	gfp-low	3032	1703	Infected	Batch1	AM_1
CTTCTCTAGCAATTAG_1	inf_1	2395	1065	210	4	1039	3	18.2046	gfp-low	gfp-low	2418	1064	Infected	Batch1	AM_3
CTTCTCTGTCTACGTA_1	inf_1	6658	2258	160	3	424	3	7.11926	gfp-low	gfp-low	3101	1781	Infected	Batch1	AM_1
CTTCTCTTCGCCGAGT_1	inf_1	1245	587	283	4	421	3	33.8956	gfp-low	gfp-low	2085	640	Infected	Batch1	IM_1
CTTGATTAGTGTTGAA_1	inf_1	762	356	380	4	536	3	0.787402	gfp-low	gfp-low	1893	479	Infected	Batch1	Neutrophils
CTTGATTCAGGACGAT_1	inf_1	4138	1396	439	4	1009	3	7.03238	gfp-low	gfp-low	2883	1346	Infected	Batch1	Neutrophils
CTTTCAAGTGGCTTAT_1	inf_1	7058	2051	242	4	1079	3	12.0997	gfp-low	gfp-low	2901	1479	Infected	Batch1	AM_1
CTTTCAATCAGTCATG_1	inf_1	2669	1073	693	4	1343	3	15.9985	gfp-low	gfp-low	2579	1071	Infected	Batch1	AM_3
CTTTCAATCTAGCATG_1	inf_1	1002	581	176	4	613	3	26.4471	gfp-low	gfp-low	2160	655	Infected	Batch1	AM_3
CTTTCGGCATCGGAAG_1	inf_1	9606	2583	375	4	1017	3	5.69436	gfp-low	gfp-low	2668	1290	Infected	Batch1	AM_1
GAAACCTAGGTACATA_1	inf_1	6470	2086	247	4	966	3	9.92272	gfp-low	gfp-low	3117	1708	Infected	Batch1	AM_1
GAAATGACAGGTGTTT_1	inf_1	884	455	346	4	579	3	2.26244	gfp-low	gfp-low	2012	570	Infected	Batch1	Neutrophils
GAACACTAGGGATCAC_1	inf_1	888	532	445	4	427	3	1.57658	gfp-low	gfp-low	1972	630	Infected	Batch1	Neutrophils
GAACACTGTACATACC_1	inf_1	2870	1243	468	4	1084	3	9.44251	gfp-low	gfp-low	2674	1242	Infected	Batch1	AM_3
GAACACTGTTTCGATG_1	inf_1	7033	2308	144	4	460	3	6.44106	gfp-low	gfp-low	3112	1750	Infected	Batch1	IM_3
GAACACTTCTACGGGC_1	inf_1	603	358	236	4	265	3	2.32172	gfp-low	gfp-low	1796	531	Infected	Batch1	Neutrophils
GAACTGTCACAGTGTT_1	inf_1	5588	1831	1592	4	1371	3	15.5154	gfp-low	gfp-low	2983	1583	Infected	Batch1	AM_4
GAACTGTTCATGGTAC_1	inf_1	9846	2830	1463	4	1390	3	13.8127	gfp-low	gfp-low	2670	1387	Infected	Batch1	AM_1
GAACTGTTCCGGTAAT_1	inf_1	1319	652	279	4	1099	3	17.0584	gfp-low	gfp-low	2137	659	Infected	Batch1	AM_3
GAAGAATAGACTAAGT_1	inf_1	1767	823	363	4	1276	3	35.3141	gfp-low	gfp-low	2169	823	Infected	Batch1	AM_4
GAAGAATGTCGGATTT_1	inf_1	1401	727	117	4	357	3	9.5646	gfp-low	gfp-low	2122	727	Infected	Batch1	Monocytes
GAAGCCCCACGATTCA_1	inf_1	4593	1531	249	4	856	3	15.6325	gfp-low	gfp-low	2875	1428	Infected	Batch1	AM_1
GAAGCCCGTCACTCTC_1	inf_1	5015	1805	428	4	1195	3	19.2423	gfp-low	gfp-low	3002	1641	Infected	Batch1	AM_4
GAAGCCCTCAAGTGGG_1	inf_1	2661	1107	306	4	1021	3	21.4581	gfp-low	gfp-low	2579	1106	Infected	Batch1	AM_3
GAAGCGATCCTGTACC_1	inf_1	7438	2003	249	4	1085	3	7.93224	gfp-low	gfp-low	2895	1401	Infected	Batch1	AM_3
GAAGGGTAGAATTGTG_1	inf_1	4741	1638	159	4	614	3	7.42459	gfp-low	gfp-low	2939	1534	Infected	Batch1	IM_3
GAAGGGTAGGTCTTTG_1	inf_1	2029	883	393	4	1082	3	32.7748	gfp-low	gfp-low	2255	883	Infected	Batch1	AM_4
GAAGGGTGTTTCACAG_1	inf_1	1488	645	103	4	141	3	0.94086	gfp-low	gfp-low	2204	646	Infected	Batch1	AM_3
GAAGTAAAGCGCCATC_1	inf_1	5452	1542	2045	4	1379	3	28.8885	gfp-low	gfp-low	2919	1328	Infected	Batch1	IM_1
GAAGTAAAGCTCGCAC_1	inf_1	14583	3381	510	4	1106	3	6.38415	gfp-low	gfp-low	2625	1283	Infected	Batch1	AM_1
GAAGTAAGTAGCACGA_1	inf_1	8411	2260	995	4	1369	3	11.9249	gfp-low	gfp-low	2790	1353	Infected	Batch1	AM_1
GAAGTAAGTATCCTCC_1	inf_1	7135	2218	177	4	993	3	3.47582	gfp-low	gfp-low	3051	1646	Infected	Batch1	IM_2
GAAGTAATCATCACCC_1	inf_1	886	401	275	4	435	3	29.9097	gfp-low	gfp-low	2204	493	Infected	Batch1	AM_3
GAATAGAAGGATAATC_1	inf_1	5514	1991	313	4	667	3	8.97715	gfp-low	gfp-low	3115	1776	Infected	Batch1	AM_1
GAATCACTCGTGAGAG_1	inf_1	7655	2347	97	4	383	3	3.55323	gfp-low	gfp-low	3045	1678	Infected	Batch1	IM_3
GAATCACTCTTGCAGA_1	inf_1	4398	1511	1825	4	1089	3	22.2601	gfp-low	gfp-low	2893	1427	Infected	Batch1	AM_1
GAATCGTAGTATCCTG_1	inf_1	5494	1892	587	4	970	3	7.42628	gfp-low	gfp-low	3049	1671	Infected	Batch1	AM_1
GACACGCAGGCCTGCT_1	inf_1	5018	1811	345	4	1064	3	23.9737	gfp-low	gfp-low	2997	1634	Infected	Batch1	IM_2
GACACGCAGTCACTAC_1	inf_1	9048	2836	904	4	1199	3	8.98541	gfp-low	gfp-low	2870	1612	Infected	Batch1	AM_1
GACACGCTCATTCGGA_1	inf_1	830	477	106	4	527	3	7.71084	gfp-low	gfp-low	2030	552	Infected	Batch1	Monocytes
GACAGCCCATGGAAGC_1	inf_1	548	334	141	4	362	3	2.0073	gfp-low	gfp-low	1921	495	Infected	Batch1	AM_3
GACAGCCTCCCTCGTA_1	inf_1	5576	2137	519	4	1287	3	4.93185	gfp-low	gfp-low	3124	1896	Infected	Batch1	AM_1
GACATCATCTTAGCTT_1	inf_1	2799	1372	293	4	1152	3	15.8985	gfp-low	gfp-low	2674	1372	Infected	Batch1	AM_1
GACCAATAGAAGGTAG_1	inf_1	1003	407	834	4	589	3	38.6839	gfp-low	gfp-low	2223	491	Infected	Batch1	Neutrophils
GACCAATAGCCTCAAT_1	inf_1	1255	688	193	4	474	3	1.11554	gfp-low	gfp-low	2008	720	Infected	Batch1	Neutrophils
GACCAATCATGGTACT_1	inf_1	3401	1358	275	4	1065	3	9.49721	gfp-low	gfp-low	2787	1357	Infected	Batch1	AM_1
GACCGTGAGTAGGGTC_1	inf_1	10283	2844	732	4	1151	3	6.8657	gfp-low	gfp-low	2712	1386	Infected	Batch1	AM_4
GACCTTCCACAACGCC_1	inf_1	1549	889	118	4	652	3	11.1039	gfp-low	gfp-low	2067	887	Infected	Batch1	Monocytes
GACCTTCCAGCGGTTC_1	inf_1	2422	1119	327	4	1036	3	14.1206	gfp-low	gfp-low	2433	1119	Infected	Batch1	AM_3
GACCTTCCATGGAGAC_1	inf_1	8984	2615	1151	4	1396	3	11.2756	gfp-low	gfp-low	2795	1493	Infected	Batch1	AM_1
GACGCTGCACAGCATT_1	inf_1	1703	757	181	4	791	3	26.2478	gfp-low	gfp-low	2185	757	Infected	Batch1	IM_4
GACGCTGGTTAGGAGC_1	inf_1	7110	1939	2011	4	1750	3	34.557	gfp-low	gfp-low	2885	1351	Infected	Batch1	AM_1
GACGCTGTCAAATGAG_1	inf_1	11815	3055	785	4	1157	3	6.66949	gfp-low	gfp-low	2632	1296	Infected	Batch1	AM_1
GACGTTAGTGCTGTCG_1	inf_1	8713	2429	380	4	1281	3	10.6737	gfp-low	gfp-low	2786	1394	Infected	Batch1	AM_1
GACTCAAAGATGCAGC_1	inf_1	980	568	436	4	703	3	3.36735	gfp-low	gfp-low	2139	619	Infected	Batch1	Neutrophils
GACTCAAAGCTAAATG_1	inf_1	6482	1923	90	4	421	3	4.42765	gfp-low	gfp-low	3021	1492	Infected	Batch1	IM_3
GACTCAAAGGATTTGA_1	inf_1	3492	1235	894	4	1210	3	22.8809	gfp-low	gfp-low	2767	1235	Infected	Batch1	AM_3
GACTCAAGTATCCTCC_1	inf_1	7211	2466	268	4	1043	3	14.9771	gfp-low	gfp-low	3107	1827	Infected	Batch1	AM_1
GACTCAAGTATCCTTT_1	inf_1	15680	3354	100	4	588	3	4.48342	gfp-low	gfp-low	2658	1246	Infected	Batch1	IM_3
GACTCTCGTTTGTTGG_1	inf_1	5604	1828	701	4	1256	3	9.79657	gfp-low	gfp-low	3041	1596	Infected	Batch1	IM_3
GACTCTCTCTTTCAGT_1	inf_1	8071	2254	231	4	1029	3	6.76496	gfp-low	gfp-low	2866	1410	Infected	Batch1	IM_2
GACTGATAGCTGTGCC_1	inf_1	7743	2315	211	4	1058	3	6.45745	gfp-low	gfp-low	2991	1624	Infected	Batch1	AM_1
GACTGATAGTCACGAG_1	inf_1	1423	796	97	4	277	3	7.23823	gfp-low	gfp-low	2074	797	Infected	Batch1	IM_3
GACTTCCAGGCGTTGA_1	inf_1	4832	1783	108	4	673	3	7.49172	gfp-low	gfp-low	3007	1657	Infected	Batch1	IM_3
GACTTCCTCACTCGAA_1	inf_1	944	570	77	4	211	3	11.9703	gfp-low	gfp-low	2126	635	Infected	Batch1	AM_2
GAGAAATGTAGCGATG_1	inf_1	4121	1466	491	4	1245	3	23.1255	gfp-low	gfp-low	2895	1426	Infected	Batch1	IM_1
GAGAAATTCGGATACT_1	inf_1	1071	605	113	4	703	3	8.02988	gfp-low	gfp-low	2072	639	Infected	Batch1	IM_1
GAGACCCCAGGTCCCA_1	inf_1	5913	1994	437	4	1068	3	7.99932	gfp-low	gfp-low	3043	1696	Infected	Batch1	AM_1
GAGACCCCATGTTCGA_1	inf_1	3805	1660	560	4	777	3	10.8279	gfp-low	gfp-low	2931	1645	Infected	Batch1	Neutrophils
GAGACCCTCTTGGTCC_1	inf_1	4160	1588	88	4	433	3	10.5048	gfp-low	gfp-low	2925	1550	Infected	Batch1	AM_1
GAGACTTAGATTCGAA_1	inf_1	3000	1267	675	4	1229	3	16.8	gfp-low	gfp-low	2701	1267	Infected	Batch1	AM_4
GAGACTTCATCGTTCC_1	inf_1	2454	1014	138	4	648	3	14.8329	gfp-low	gfp-low	2454	1014	Infected	Batch1	AM_3
GAGACTTGTCTGCATA_1	inf_1	2100	892	123	4	670	3	32.3333	gfp-low	gfp-low	2290	891	Infected	Batch1	AM_2
GAGATGGGTTCCTTGC_1	inf_1	781	429	275	4	480	3	2.1767	gfp-low	gfp-low	1906	567	Infected	Batch1	Neutrophils
GAGCCTGGTGAGATTA_1	inf_1	9940	2566	2152	4	1356	3	14.668	gfp-low	gfp-low	2640	1240	Infected	Batch1	AM_1
GAGCTGCAGTAAGCAT_1	inf_1	13234	3299	428	4	1257	3	6.71755	gfp-low	gfp-low	2612	1332	Infected	Batch1	AM_1
GAGGCAAAGCACGTCC_1	inf_1	1036	391	857	4	907	3	35.7143	gfp-low	gfp-low	2173	477	Infected	Batch1	Neutrophils
GAGGCCTAGTCGGGAT_1	inf_1	4577	1455	173	4	803	3	8.93598	gfp-low	gfp-low	2906	1350	Infected	Batch1	Macrophages/T-cells
GAGGCCTAGTGTAGTA_1	inf_1	917	497	33	3	140	3	8.61505	gfp-low	gfp-low	2134	570	Infected	Batch1	DC.103+11B-
GAGGCCTTCAAGGTGG_1	inf_1	5480	1803	833	4	1221	3	9.05109	gfp-low	gfp-low	2966	1575	Infected	Batch1	AM_1
GAGGGATCACTACCCT_1	inf_1	5030	1723	339	4	1004	3	13.996	gfp-low	gfp-low	2983	1570	Infected	Batch1	AM_1
GAGGGATCACTGTCCT_1	inf_1	1461	703	144	4	256	3	10.3354	gfp-low	gfp-low	2036	705	Infected	Batch1	IM_1
GAGGGATTCACGATAC_1	inf_1	2762	1163	410	4	1138	3	20.4562	gfp-low	gfp-low	2622	1163	Infected	Batch1	AM_3
GAGGGATTCCATTGCC_1	inf_1	15857	3482	777	4	1246	3	4.57842	gfp-low	gfp-low	2664	1311	Infected	Batch1	AM_1
GAGGGTACACTAGTAC_1	inf_1	4231	1512	278	4	795	3	11.4394	gfp-low	gfp-low	2903	1464	Infected	Batch1	AM_1
GAGGGTACAGTTAGAA_1	inf_1	3368	1200	85	4	253	3	5.81948	gfp-low	gfp-low	2762	1199	Infected	Batch1	IM_1
GAGGGTAGTTCCCAAA_1	inf_1	1995	1038	425	4	906	3	8.97243	gfp-low	gfp-low	2207	1036	Infected	Batch1	Monocytes
GAGTCATCAAGGTCTT_1	inf_1	5556	1829	559	4	1230	3	30.0216	gfp-low	gfp-low	3019	1561	Infected	Batch1	AM_3
GAGTCATGTGGAGAAA_1	inf_1	566	354	114	4	212	3	1.23675	gfp-low	gfp-low	1865	502	Infected	Batch1	IM_4
GAGTCATTCTACTGCC_1	inf_1	9414	2936	290	4	1052	3	8.85915	gfp-low	gfp-low	2858	1601	Infected	Batch1	AM_1
GAGTCTACAATGGGTG_1	inf_1	2761	1149	194	4	443	3	5.14306	gfp-low	gfp-low	2613	1149	Infected	Batch1	AM_3
GAGTGAGAGATCCCAT_1	inf_1	1846	757	299	4	1130	3	38.6782	gfp-low	gfp-low	2224	757	Infected	Batch1	AM_2
GAGTGAGAGATCCGAG_1	inf_1	4531	1569	571	4	1279	3	20.1059	gfp-low	gfp-low	2929	1467	Infected	Batch1	Macrophages/B-cells
GAGTTACCAATTGCGT_1	inf_1	5926	1971	2091	4	958	3	4.89369	gfp-low	gfp-low	3047	1690	Infected	Batch1	AM_1
GAGTTACGTATCGCAT_1	inf_1	5739	2026	223	4	1024	3	6.95243	gfp-low	gfp-low	3084	1775	Infected	Batch1	AM_1
GAGTTACTCATTTGTC_1	inf_1	1439	716	168	4	867	3	26.1987	gfp-low	gfp-low	2119	718	Infected	Batch1	AM_2
GAGTTGTTCACATACG_1	inf_1	5317	1889	413	4	1309	3	9.74234	gfp-low	gfp-low	3022	1696	Infected	Batch1	AM_1
GAGTTGTTCTGACAGT_1	inf_1	3616	1459	959	4	1271	3	8.49004	gfp-low	gfp-low	2833	1455	Infected	Batch1	AM_1
GAGTTTGGTAAGGCTG_1	inf_1	9822	2725	422	4	979	3	3.74669	gfp-low	gfp-low	2666	1362	Infected	Batch1	AM_1
GAGTTTGTCGGTCGAC_1	inf_1	7302	2309	402	4	1247	3	6.01205	gfp-low	gfp-low	3026	1664	Infected	Batch1	AM_1
GATAGCTCACTTGACA_1	inf_1	9464	2789	309	4	1260	3	6.77303	gfp-low	gfp-low	2770	1492	Infected	Batch1	AM_1
GATAGCTGTGAGCTCC_1	inf_1	11498	2986	242	4	1118	3	4.3051	gfp-low	gfp-low	2607	1300	Infected	Batch1	AM_1
GATAGCTGTTGGGAAC_1	inf_1	2881	1224	160	4	706	3	4.89413	gfp-low	gfp-low	2668	1224	Infected	Batch1	IM_1
GATAGCTTCAGACCGC_1	inf_1	953	574	90	4	362	3	8.07975	gfp-low	gfp-low	2065	640	Infected	Batch1	Monocytes
GATCACAGTTGAAGTA_1	inf_1	1862	874	815	4	988	3	0.537057	gfp-low	gfp-low	2153	874	Infected	Batch1	Neutrophils
GATCAGTCAGAACTAA_1	inf_1	7004	1839	114	4	370	3	7.83838	gfp-low	gfp-low	2919	1341	Infected	Batch1	IM_3
GATCAGTCAGACCATT_1	inf_1	2143	888	1129	4	1343	3	21.0919	gfp-low	gfp-low	2311	888	Infected	Batch1	AM_2
GATCAGTGTTCCTAAG_1	inf_1	1358	710	118	4	486	3	17.8203	gfp-low	gfp-low	2072	717	Infected	Batch1	IM_1
GATCATGAGCAAGTCG_1	inf_1	1278	558	621	4	1222	3	37.6369	gfp-low	gfp-low	2173	587	Infected	Batch1	AM_3
GATCATGAGCGAATGC_1	inf_1	3877	1498	245	4	1088	3	16.7913	gfp-low	gfp-low	2878	1480	Infected	Batch1	AM_1
GATCATGAGTAGTCCT_1	inf_1	1700	950	182	4	901	3	8.41176	gfp-low	gfp-low	2121	949	Infected	Batch1	AM_3
GATCATGCACAATTCG_1	inf_1	3989	1376	1788	4	1482	3	28.353	gfp-low	gfp-low	2843	1335	Infected	Batch1	AM_4
GATCATGGTCATCAGT_1	inf_1	4728	1744	765	4	1227	3	10.3426	gfp-low	gfp-low	2940	1630	Infected	Batch1	AM_1
GATCCCTTCGATAACC_1	inf_1	4442	1796	113	4	694	3	5.24538	gfp-low	gfp-low	2983	1730	Infected	Batch1	IM_3
GATCGTACAATGAAAC_1	inf_1	9648	2146	346	4	1216	3	6.25	gfp-low	gfp-low	2700	1028	Infected	Batch1	IM_2
GATCGTAGTGTTGATC_1	inf_1	3575	1337	114	4	479	3	15.0769	gfp-low	gfp-low	2825	1337	Infected	Batch1	IM_3
GATCGTATCCTAGCCT_1	inf_1	8351	2765	761	4	1301	3	12.9805	gfp-low	gfp-low	3007	1753	Infected	Batch1	Macrophages/T-cells
GATGATCGTCTAGATC_1	inf_1	843	508	329	4	339	3	0.711744	gfp-low	gfp-low	2009	596	Infected	Batch1	Neutrophils
GATGATCTCAGTGTCA_1	inf_1	14499	3271	299	4	855	3	3.40713	gfp-low	gfp-low	2640	1267	Infected	Batch1	AM_1
GATGCTACAACGATTC_1	inf_1	1128	486	455	4	370	3	2.57092	gfp-low	gfp-low	2042	552	Infected	Batch1	Neutrophils
GATGCTATCACCTACC_1	inf_1	1853	1079	93	4	421	3	4.15542	gfp-low	gfp-low	2112	1079	Infected	Batch1	Monocytes
GATGTTGGTTTAGTCG_1	inf_1	1469	644	407	4	975	3	17.2226	gfp-low	gfp-low	2151	644	Infected	Batch1	IM_2
GATTCGACACTGGCGT_1	inf_1	2020	1019	88	4	326	3	5.44554	gfp-low	gfp-low	2215	1018	Infected	Batch1	Monocytes
GATTCGATCTTGCAAG_1	inf_1	4668	1820	1922	4	1318	3	15.2742	gfp-low	gfp-low	2987	1708	Infected	Batch1	AM_4
GATTCTTCAGCCCAGT_1	inf_1	843	445	56	4	451	3	32.503	gfp-low	gfp-low	2094	568	Infected	Batch1	AM_2
GATTCTTGTCTTTCTA_1	inf_1	3272	1276	454	4	1003	3	12.1027	gfp-low	gfp-low	2763	1276	Infected	Batch1	AM_1
GATTGGTAGCGGCTCT_1	inf_1	6280	2154	259	4	721	3	10.1752	gfp-low	gfp-low	3080	1767	Infected	Batch1	AM_1
GATTGGTAGCTTACGT_1	inf_1	2252	1194	79	4	320	3	1.7762	gfp-low	gfp-low	2308	1193	Infected	Batch1	Monocytes
GATTTCTGTTAACCTG_1	inf_1	1393	799	236	4	825	3	14.7882	gfp-low	gfp-low	2077	799	Infected	Batch1	AM_2
GCAACATAGGCTGAAC_1	inf_1	2454	904	125	4	514	3	19.5599	gfp-low	gfp-low	2455	904	Infected	Batch1	IM_1
GCAACATCAGTTGCGC_1	inf_1	1840	852	485	4	1416	3	30.3261	gfp-low	gfp-low	2203	852	Infected	Batch1	AM_2
GCAACATTCAAAGGAT_1	inf_1	871	506	253	3	294	3	1.14811	gfp-low	gfp-low	2025	586	Infected	Batch1	Neutrophils
GCAACATTCTCAAAGC_1	inf_1	739	512	85	4	377	3	13.6671	gfp-low	gfp-low	1875	666	Infected	Batch1	Monocytes
GCAACCGAGCTCCACG_1	inf_1	2506	1084	119	4	726	3	27.494	gfp-low	gfp-low	2496	1084	Infected	Batch1	IM_2
GCAACCGCAGTCGGAA_1	inf_1	1968	964	162	4	763	3	24.2886	gfp-low	gfp-low	2207	963	Infected	Batch1	IM_1
GCAACCGTCCCAGTGG_1	inf_1	1730	723	533	4	589	3	0.635838	gfp-low	gfp-low	2143	723	Infected	Batch1	Neutrophils
GCACATAGTATAATGG_1	inf_1	2744	1099	182	4	1047	3	27.2595	gfp-low	gfp-low	2617	1099	Infected	Batch1	AM_1
GCACATAGTTCGAAGG_1	inf_1	13179	3091	455	4	1063	3	3.01237	gfp-low	gfp-low	2643	1306	Infected	Batch1	AM_1
GCACGGTAGAGTTCGG_1	inf_1	1337	747	126	4	296	3	18.923	gfp-low	gfp-low	2001	767	Infected	Batch1	IM_1
GCACGGTTCAATCGGT_1	inf_1	1968	954	137	4	532	3	15.6504	gfp-low	gfp-low	2220	954	Infected	Batch1	IM_1
GCACGTGAGATGAAGG_1	inf_1	2407	987	689	4	1389	3	36.8509	gfp-low	gfp-low	2428	986	Infected	Batch1	AM_4
GCACGTGAGCGGATCA_1	inf_1	13863	3113	461	4	1129	3	4.54447	gfp-low	gfp-low	2631	1261	Infected	Batch1	AM_1
GCACGTGAGTGGTCAG_1	inf_1	15283	3455	1000	4	1362	3	8.9773	gfp-low	gfp-low	2731	1438	Infected	Batch1	AM_1
GCACGTGGTGGTCCGT_1	inf_1	4705	1666	138	4	804	3	6.56748	gfp-low	gfp-low	2948	1556	Infected	Batch1	IM_3
GCACGTGTCTTCCGTG_1	inf_1	14006	3137	250	4	914	3	7.13266	gfp-low	gfp-low	2571	1196	Infected	Batch1	AM_1
GCACTAAAGCCTCTTC_1	inf_1	3488	1455	162	4	525	3	7.68349	gfp-low	gfp-low	2852	1455	Infected	Batch1	IM_2
GCACTAAAGTAACGAT_1	inf_1	1136	545	456	4	491	3	1.49648	gfp-low	gfp-low	2042	606	Infected	Batch1	Neutrophils
GCAGCCACATCCGATA_1	inf_1	583	435	133	4	281	3	4.97427	gfp-low	gfp-low	1683	618	Infected	Batch1	IM_1
GCAGCTGAGACGACTG_1	inf_1	1457	677	214	4	739	3	12.2855	gfp-low	gfp-low	2180	678	Infected	Batch1	AM_3
GCAGCTGTCGTGCATA_1	inf_1	6921	2247	757	4	1320	3	14.6222	gfp-low	gfp-low	3019	1708	Infected	Batch1	AM_1
GCAGGCTAGCCGTTAT_1	inf_1	13859	3423	410	4	1002	3	4.48806	gfp-low	gfp-low	2797	1492	Infected	Batch1	AM_1
GCAGGCTAGGGACACT_1	inf_1	10148	2696	719	4	1248	3	4.36539	gfp-low	gfp-low	2606	1255	Infected	Batch1	AM_1
GCAGGCTTCACAAGGG_1	inf_1	1113	628	155	4	460	3	20.3953	gfp-low	gfp-low	2068	660	Infected	Batch1	IM_4
GCAGGCTTCATGCATG_1	inf_1	5170	1871	98	4	365	2	1.93424	gfp-low	gfp-low	3158	1739	Infected	Batch1	DC
GCAGGCTTCGGTCGAC_1	inf_1	6781	2374	577	4	1105	3	12.7857	gfp-low	gfp-low	3148	1879	Infected	Batch1	AM_4
GCAGTTAAGGATAATC_1	inf_1	6979	2308	503	4	1003	3	11.6492	gfp-low	gfp-low	3168	1771	Infected	Batch1	AM_1
GCAGTTATCCGATAGT_1	inf_1	5178	1818	274	4	1034	3	21.6686	gfp-low	gfp-low	3004	1636	Infected	Batch1	AM_1
GCAGTTATCTGCATAG_1	inf_1	1445	837	103	4	292	3	4.77509	gfp-low	gfp-low	2055	837	Infected	Batch1	Monocytes
GCATCGGCATAGTCGT_1	inf_1	3168	1324	127	3	400	3	6.56566	gfp-low	gfp-low	2756	1324	Infected	Batch1	IM_3
GCATCGGTCAAGCGTT_1	inf_1	1623	725	485	4	1190	3	28.281	gfp-low	gfp-low	2199	724	Infected	Batch1	AM_2
GCATCTCAGTGGTTAA_1	inf_1	1841	778	476	4	1142	3	33.4601	gfp-low	gfp-low	2228	778	Infected	Batch1	AM_3
GCATCTCCACCGCTGA_1	inf_1	1647	731	72	4	287	3	25.8045	gfp-low	gfp-low	2193	731	Infected	Batch1	AM_2
GCATCTCGTACGGCAA_1	inf_1	3482	1321	346	4	1029	3	33.027	gfp-low	gfp-low	2826	1320	Infected	Batch1	AM_1
GCATCTCGTACTCGCG_1	inf_1	6651	2176	704	4	1221	3	8.84078	gfp-low	gfp-low	3042	1721	Infected	Batch1	AM_1
GCATCTCGTGGCCCAT_1	inf_1	1611	803	157	4	921	3	19.491	gfp-low	gfp-low	2116	803	Infected	Batch1	IM_1
GCATCTCTCTACACTT_1	inf_1	1738	986	207	4	692	3	11.7952	gfp-low	gfp-low	2112	985	Infected	Batch1	Neutrophils
GCATGATAGCAAGTGC_1	inf_1	1519	801	259	4	1300	3	8.55826	gfp-low	gfp-low	2094	800	Infected	Batch1	Neutrophils
GCATGATCAGCTTCGG_1	inf_1	2525	1075	169	4	827	3	23.604	gfp-low	gfp-low	2506	1075	Infected	Batch1	AM_3
GCATGATGTCACAGAG_1	inf_1	679	407	101	4	172	3	2.20913	gfp-low	gfp-low	1979	505	Infected	Batch1	AM_3
GCATTAGCACAGTGTT_1	inf_1	3330	1210	1311	4	1355	3	22.3423	gfp-low	gfp-low	2771	1209	Infected	Batch1	AM_1
GCATTAGGTACCCAGC_1	inf_1	11084	2792	528	4	1292	3	6.71238	gfp-low	gfp-low	2615	1232	Infected	Batch1	IM_3
GCCAACGAGGAACGTC_1	inf_1	6860	2269	647	4	1088	3	14.0671	gfp-low	gfp-low	3016	1700	Infected	Batch1	AM_1
GCCAACGAGGCTGTAG_1	inf_1	2210	950	355	4	798	3	31.6742	gfp-low	gfp-low	2322	949	Infected	Batch1	IM_1
GCCAGCAAGAGGCGGA_1	inf_1	1376	791	135	4	485	3	12.936	gfp-low	gfp-low	2025	791	Infected	Batch1	Monocytes
GCCAGCACAAGGTCAG_1	inf_1	10370	2708	529	4	1219	3	7.53134	gfp-low	gfp-low	2624	1245	Infected	Batch1	AM_1
GCCAGCACATCCGATA_1	inf_1	2992	1198	509	4	1090	3	19.4519	gfp-low	gfp-low	2707	1198	Infected	Batch1	IM_2
GCCAGCAGTCTAACGT_1	inf_1	936	468	99	4	537	3	27.9915	gfp-low	gfp-low	2128	573	Infected	Batch1	IM_1
GCCAGCAGTCTGCGCA_1	inf_1	1341	818	106	4	266	3	4.25056	gfp-low	gfp-low	2001	819	Infected	Batch1	Monocytes
GCCAGGTAGAAGTCTA_1	inf_1	1838	1012	167	4	602	3	5.05985	gfp-low	gfp-low	2121	1012	Infected	Batch1	Neutrophils
GCCAGGTTCTCAGGCG_1	inf_1	3231	1106	1135	4	1217	3	17.4249	gfp-low	gfp-low	2713	1102	Infected	Batch1	Neutrophils
GCCAGTGTCCCGTAAA_1	inf_1	5857	2191	739	4	1356	3	11.4905	gfp-low	gfp-low	3116	1906	Infected	Batch1	Macrophages/T-cells
GCCATGGCAGGACTTT_1	inf_1	4841	1615	83	3	298	3	2.82999	gfp-low	gfp-low	2987	1512	Infected	Batch1	DC.103+11B-
GCCATGGGTAGACAAT_1	inf_1	1820	830	126	4	653	3	11.2088	gfp-low	gfp-low	2217	829	Infected	Batch1	IM_4
GCCATGGGTCACAATC_1	inf_1	7643	2703	126	4	578	3	5.44289	gfp-low	gfp-low	3196	1960	Infected	Batch1	IM_3
GCCATTCCATCACAGT_1	inf_1	2178	992	227	4	1018	3	11.2489	gfp-low	gfp-low	2300	992	Infected	Batch1	AM_3
GCCATTCGTAGGCTCC_1	inf_1	3735	1487	280	4	1030	3	8.11245	gfp-low	gfp-low	2871	1477	Infected	Batch1	IM_2
GCCCAGACAATCACGT_1	inf_1	605	344	250	4	269	3	1.98347	gfp-low	gfp-low	1763	517	Infected	Batch1	Neutrophils
GCCGATGAGACGATAT_1	inf_1	619	373	375	4	318	3	0.969305	gfp-low	gfp-low	1821	525	Infected	Batch1	Neutrophils
GCCGATGAGTCCCAAT_1	inf_1	15909	3441	1560	4	1203	3	5.61317	gfp-low	gfp-low	2704	1341	Infected	Batch1	AM_1
GCCGTGAAGAGTCTGG_1	inf_1	1903	890	88	4	501	3	5.41251	gfp-low	gfp-low	2235	890	Infected	Batch1	AM_3
GCCGTGAAGGCAGGTT_1	inf_1	591	457	48	3	292	3	4.90694	gfp-low	gfp-low	1736	623	Infected	Batch1	Monocytes
GCCGTGAGTGGGTTGA_1	inf_1	2844	1462	82	4	340	3	4.25457	gfp-low	gfp-low	2706	1462	Infected	Batch1	Monocytes
GCCGTGATCTGTGTGA_1	inf_1	528	303	86	4	144	3	2.84091	gfp-low	gfp-low	1958	480	Infected	Batch1	IM_4
GCCTGTTGTTAGTCGT_1	inf_1	7689	2179	185	4	656	3	11.2628	gfp-low	gfp-low	2950	1485	Infected	Batch1	IM_2
GCGAGAAGTCATTCCC_1	inf_1	12985	3202	208	4	1040	3	2.80323	gfp-low	gfp-low	2665	1375	Infected	Batch1	AM_1
GCGAGAAGTTCATCTT_1	inf_1	3727	1276	359	4	1181	3	25.9995	gfp-low	gfp-low	2808	1260	Infected	Batch1	AM_3
GCGAGAATCCACGGAC_1	inf_1	7464	2128	467	4	1305	3	2.2508	gfp-low	gfp-low	2942	1504	Infected	Batch1	AM_1
GCGATCGAGGTTGAGC_1	inf_1	6826	2075	531	4	1257	3	5.53765	gfp-low	gfp-low	2995	1585	Infected	Batch1	AM_1
GCGATCGGTCATCCGG_1	inf_1	3300	1214	182	4	534	3	22.4545	gfp-low	gfp-low	2755	1214	Infected	Batch1	IM_3
GCGGAAAGTCCGACGT_1	inf_1	7421	2429	408	4	1302	3	13.8526	gfp-low	gfp-low	3037	1740	Infected	Batch1	AM_1
GCGTGCACAATTGCAC_1	inf_1	1985	907	75	3	1048	3	13.4005	gfp-low	gfp-low	2243	906	Infected	Batch1	IM_4
GCGTGCACATCCAACA_1	inf_1	3598	1282	211	4	543	3	22.04	gfp-low	gfp-low	2803	1276	Infected	Batch1	AM_1
GCGTTTCAGAGAGTGA_1	inf_1	7291	1928	1997	4	1466	3	29.3924	gfp-low	gfp-low	2853	1319	Infected	Batch1	AM_4
GCGTTTCCACGCGCAT_1	inf_1	4589	1775	481	4	1093	3	7.9538	gfp-low	gfp-low	2969	1688	Infected	Batch1	AM_1
GCGTTTCCAGTCGCTG_1	inf_1	6561	2162	110	4	887	3	9.26688	gfp-low	gfp-low	3049	1699	Infected	Batch1	AM_1
GCGTTTCGTTCTCGTC_1	inf_1	7913	2396	787	4	1209	3	10.6028	gfp-low	gfp-low	2957	1593	Infected	Batch1	AM_1
GCTACAAGTCCCAAAT_1	inf_1	2053	924	244	4	910	3	30.3458	gfp-low	gfp-low	2256	923	Infected	Batch1	AM_1
GCTACAAGTCTGCATA_1	inf_1	11559	2985	678	4	1246	3	9.08383	gfp-low	gfp-low	2617	1286	Infected	Batch1	AM_1
GCTACCTAGGTAGATT_1	inf_1	9682	2806	499	4	904	3	8.15947	gfp-low	gfp-low	2784	1471	Infected	Batch1	AM_1
GCTACCTCAGTCAACT_1	inf_1	504	256	69	3	145	3	1.78571	gfp-low	gfp-low	1967	436	Infected	Batch1	IM_4
GCTACCTGTGTTCCTC_1	inf_1	2708	1100	1162	4	1261	3	35.709	gfp-low	gfp-low	2600	1098	Infected	Batch1	AM_1
GCTGAATAGCGTGCTC_1	inf_1	851	562	83	4	250	3	4.23032	gfp-low	gfp-low	1998	639	Infected	Batch1	Monocytes
GCTGAATCAACAGCTT_1	inf_1	5024	1624	212	4	1027	3	18.7301	gfp-low	gfp-low	2938	1464	Infected	Batch1	IM_2
GCTGAATGTCACTGAT_1	inf_1	9720	2545	484	4	1202	3	7.73663	gfp-low	gfp-low	2611	1221	Infected	Batch1	AM_1
GCTGAATGTGCTCGTG_1	inf_1	7956	2194	1522	4	1392	3	17.2071	gfp-low	gfp-low	2914	1426	Infected	Batch1	AM_1
GCTGAATTCCCATTTA_1	inf_1	9502	2356	248	4	848	3	1.95748	gfp-low	gfp-low	2812	1227	Infected	Batch1	IM_3
GCTGCAGCAAATTAGG_1	inf_1	921	587	80	4	345	3	4.66884	gfp-low	gfp-low	2069	640	Infected	Batch1	Monocytes
GCTGCAGTCTAGCATG_1	inf_1	1402	619	708	4	383	3	0.285307	gfp-low	gfp-low	2057	627	Infected	Batch1	Neutrophils
GCTGGGTCAGAGGTTG_1	inf_1	2356	1116	244	4	810	3	15.4075	gfp-low	gfp-low	2379	1111	Infected	Batch1	DC
GCTGGGTGTGTACGCC_1	inf_1	3139	1234	255	4	820	3	4.77859	gfp-low	gfp-low	2716	1234	Infected	Batch1	AM_3
GCTGGGTTCGAGATAA_1	inf_1	6220	1902	262	4	1265	3	4.4373	gfp-low	gfp-low	2984	1534	Infected	Batch1	AM_1
GCTGGGTTCGTAGTCA_1	inf_1	5393	1884	466	4	1291	3	9.47525	gfp-low	gfp-low	3051	1683	Infected	Batch1	Macrophages/T-cells
GCTTCACGTCGAGCAA_1	inf_1	768	384	188	4	400	3	2.60417	gfp-low	gfp-low	1887	520	Infected	Batch1	Neutrophils
GCTTCACGTTCGTACA_1	inf_1	855	513	915	4	716	3	2.10526	gfp-low	gfp-low	1979	607	Infected	Batch1	Neutrophils
GCTTGGGGTGAAGCGT_1	inf_1	2621	1047	94	4	383	3	25.6772	gfp-low	gfp-low	2557	1046	Infected	Batch1	IM_3
[truncated: 15,103 more rows]

## Sheet: 31 TB cohortf of human
Source	Sample	Age	Gender	Ethnicity	TBStatus	GeographicalRegion	BcgVaccinated	BirthRegion	TST	Tissue	HIVStatus	MeasurementTime	PatientID	PneumoniaStatus	exposure_latent	index_case_disease_site	smear_of_index_case	modal_x_ray_grade	SputumSmearStatus	sputum_culture	bal_smear	bal_culture	isolate_sensitivity	QFT_GIT	ChestRadiographs	NET1	Treatment	DiabetesStatus	SmokingStatus	PatientRelationship	HealthControl	StillStatus	AdultSLE_Status	PediatricSLE_Status	StaphStatus	StrepStatus	Barcode	CultureStatus	SarcoidosisStatus	LungCancerStatus	TreatmentResult	IRIS_Status	MeningitisStatus	SampleCode	TimeToNegativity	mgit	xpert	tgrv	LungDxStatus
GSE41055	GSM1008060	8	Male	NA	Control	Venezuela	NA	NA	0	Whole Blood	NA	NA	NA	NA	NA	NA	NA	NA	NA	NA	NA	NA	NA	Negative	No abnormalities observed	0.191318	NA	NA	NA	NA	NA	NA	NA	NA	NA	NA	NA	NA	NA	NA	NA	NA	NA	NA	NA	NA	NA	NA	NA
GSE41055	GSM1008061	7.8	Female	NA	Control	Venezuela	NA	NA	0	Whole Blood	NA	NA	NA	NA	NA	NA	NA	NA	NA	NA	NA	NA	NA	Negative	No abnormalities observed	0.132429	NA	NA	NA	NA	NA	NA	NA	NA	NA	NA	NA	NA	NA	NA	NA	NA	NA	NA	NA	NA	NA	NA	NA
GSE41055	GSM1008062	4.1	Female	NA	Control	Venezuela	NA	NA	0	Whole Blood	NA	NA	NA	NA	NA	NA	NA	NA	NA	Negative	NA	NA	NA	Negative	No abnormalities observed	-0.146457	NA	NA	NA	NA	NA	NA	NA	NA	NA	NA	NA	NA	NA	NA	NA	NA	NA	NA	NA	NA	NA	NA	NA
GSE41055	GSM1008063	1.3	Female	NA	Control	Venezuela	NA	NA	0	Whole Blood	NA	NA	NA	NA	NA	NA	NA	NA	NA	Negative	NA	NA	NA	Negative	No abnormalities observed	-1.4961	NA	NA	NA	NA	NA	NA	NA	NA	NA	NA	NA	NA	NA	NA	NA	NA	NA	NA	NA	NA	NA	NA	NA
GSE41055	GSM1008064	3.5	Female	NA	Control	Venezuela	NA	NA	0	Whole Blood	NA	NA	NA	NA	NA	NA	NA	NA	NA	Negative	NA	NA	NA	Negative	No abnormalities observed	-1.08414	NA	NA	NA	NA	NA	NA	NA	NA	NA	NA	NA	NA	NA	NA	NA	NA	NA	NA	NA	NA	NA	NA	NA
GSE41055	GSM1008065	8.1	Female	NA	Control	Venezuela	NA	NA	0	Whole Blood	NA	NA	NA	NA	NA	NA	NA	NA	NA	NA	NA	NA	NA	Negative	No abnormalities observed	-0.769548	NA	NA	NA	NA	NA	NA	NA	NA	NA	NA	NA	NA	NA	NA	NA	NA	NA	NA	NA	NA	NA	NA	NA
GSE41055	GSM1008066	9.6	Male	NA	Control	Venezuela	NA	NA	0	Whole Blood	NA	NA	NA	NA	NA	NA	NA	NA	NA	NA	NA	NA	NA	Negative	No abnormalities observed	1.80321	NA	NA	NA	NA	NA	NA	NA	NA	NA	NA	NA	NA	NA	NA	NA	NA	NA	NA	NA	NA	NA	NA	NA
GSE41055	GSM1008067	11	Female	NA	Control	Venezuela	NA	NA	0	Whole Blood	NA	NA	NA	NA	NA	NA	NA	NA	NA	NA	NA	NA	NA	Negative	No abnormalities observed	1.09632	NA	NA	NA	NA	NA	NA	NA	NA	NA	NA	NA	NA	NA	NA	NA	NA	NA	NA	NA	NA	NA	NA	NA
GSE41055	GSM1008068	11.5	Female	NA	Control	Venezuela	NA	NA	0	Whole Blood	NA	NA	NA	NA	NA	NA	NA	NA	NA	NA	NA	NA	NA	Negative	No abnormalities observed	-0.534898	NA	NA	NA	NA	NA	NA	NA	NA	NA	NA	NA	NA	NA	NA	NA	NA	NA	NA	NA	NA	NA	NA	NA
GSE41055	GSM1008069	7	Male	NA	LTBI	Venezuela	NA	NA	20	Whole Blood	NA	NA	NA	NA	NA	NA	NA	NA	NA	NA	NA	NA	NA	Positive	No abnormalities observed	0.290713	NA	NA	NA	NA	NA	NA	NA	NA	NA	NA	NA	NA	NA	NA	NA	NA	NA	NA	NA	NA	NA	NA	NA
GSE41055	GSM1008070	13.9	Male	NA	LTBI	Venezuela	NA	NA	18	Whole Blood	NA	NA	NA	NA	NA	NA	NA	NA	NA	NA	NA	NA	NA	Positive	No abnormalities observed	-1.66511	NA	NA	NA	NA	NA	NA	NA	NA	NA	NA	NA	NA	NA	NA	NA	NA	NA	NA	NA	NA	NA	NA	NA
GSE41055	GSM1008071	7.3	Male	NA	LTBI	Venezuela	NA	NA	14	Whole Blood	NA	NA	NA	NA	NA	NA	NA	NA	NA	NA	NA	NA	NA	Positive	No abnormalities observed	0.267044	NA	NA	NA	NA	NA	NA	NA	NA	NA	NA	NA	NA	NA	NA	NA	NA	NA	NA	NA	NA	NA	NA	NA
GSE41055	GSM1008072	2.2	Male	NA	LTBI	Venezuela	NA	NA	13	Whole Blood	NA	NA	NA	NA	NA	NA	NA	NA	NA	Negative	NA	NA	NA	Positive	No abnormalities observed	-0.51353	NA	NA	NA	NA	NA	NA	NA	NA	NA	NA	NA	NA	NA	NA	NA	NA	NA	NA	NA	NA	NA	NA	NA
GSE41055	GSM1008073	3	Female	NA	LTBI	Venezuela	NA	NA	11	Whole Blood	NA	NA	NA	NA	NA	NA	NA	NA	NA	Negative	NA	NA	NA	Positive	No abnormalities observed	-0.104861	NA	NA	NA	NA	NA	NA	NA	NA	NA	NA	NA	NA	NA	NA	NA	NA	NA	NA	NA	NA	NA	NA	NA
GSE41055	GSM1008074	9	Male	NA	LTBI	Venezuela	NA	NA	14	Whole Blood	NA	NA	NA	NA	NA	NA	NA	NA	NA	NA	NA	NA	NA	Positive	No abnormalities observed	0.284349	NA	NA	NA	NA	NA	NA	NA	NA	NA	NA	NA	NA	NA	NA	NA	NA	NA	NA	NA	NA	NA	NA	NA
GSE41055	GSM1008075	10.5	Female	NA	LTBI	Venezuela	NA	NA	10	Whole Blood	NA	NA	NA	NA	NA	NA	NA	NA	NA	NA	NA	NA	NA	Positive	No abnormalities observed	-0.907018	NA	NA	NA	NA	NA	NA	NA	NA	NA	NA	NA	NA	NA	NA	NA	NA	NA	NA	NA	NA	NA	NA	NA
GSE41055	GSM1008076	12.7	Female	NA	LTBI	Venezuela	NA	NA	14	Whole Blood	NA	NA	NA	NA	NA	NA	NA	NA	NA	NA	NA	NA	NA	Positive	No abnormalities observed	0.0292278	NA	NA	NA	NA	NA	NA	NA	NA	NA	NA	NA	NA	NA	NA	NA	NA	NA	NA	NA	NA	NA	NA	NA
GSE41055	GSM1008077	14.6	Male	NA	LTBI	Venezuela	NA	NA	10	Whole Blood	NA	NA	NA	NA	NA	NA	NA	NA	NA	NA	NA	NA	NA	Positive	No abnormalities observed	-0.200303	NA	NA	NA	NA	NA	NA	NA	NA	NA	NA	NA	NA	NA	NA	NA	NA	NA	NA	NA	NA	NA	NA	NA
GSE41055	GSM1008078	1.8	Female	NA	PTB	Venezuela	NA	NA	0	Whole Blood	NA	NA	NA	NA	NA	NA	NA	NA	NA	Negative	NA	NA	NA	Positive	Ghon focus with unilateral bronchopneumonic consolidation	0.499791	NA	NA	NA	NA	NA	NA	NA	NA	NA	NA	NA	NA	NA	NA	NA	NA	NA	NA	NA	NA	NA	NA	NA
GSE41055	GSM1008079	11.5	Female	NA	PTB	Venezuela	NA	NA	18	Whole Blood	NA	NA	NA	NA	NA	NA	NA	NA	NA	Positive	NA	NA	NA	Positive	Adult-type disease with bilateral bronchopneumonic consolidation, lymph node disease	0.565659	NA	NA	NA	NA	NA	NA	NA	NA	NA	NA	NA	NA	NA	NA	NA	NA	NA	NA	NA	NA	NA	NA	NA
GSE41055	GSM1008080	7.5	Female	NA	PTB	Venezuela	NA	NA	6	Whole Blood	NA	NA	NA	NA	NA	NA	NA	NA	NA	Negative	NA	NA	NA	Positive	Adult-type disease with unilateral cavitation and bilateral bronchopneumonic consolidation, lymph node disease with bronchial compression	1.57436	NA	NA	NA	NA	NA	NA	NA	NA	NA	NA	NA	NA	NA	NA	NA	NA	NA	NA	NA	NA	NA	NA	NA
GSE41055	GSM1008081	1.1	Female	NA	PTB	Venezuela	NA	NA	10	Whole Blood	NA	NA	NA	NA	NA	NA	NA	NA	NA	Negative	NA	NA	NA	Indeterminate	Ghon focus with cavitation and bilateral bronchopneumonic consolidation, lymph node disease with tracheal compression	-1.60582	NA	NA	NA	NA	NA	NA	NA	NA	NA	NA	NA	NA	NA	NA	NA	NA	NA	NA	NA	NA	NA	NA	NA
GSE41055	GSM1008082	2.3	Male	NA	PTB	Venezuela	NA	NA	3	Whole Blood	NA	NA	NA	NA	NA	NA	NA	NA	NA	Negative	NA	NA	NA	Positive	Ghon focus with bilateral bronchopneumonic consolidation, lymph node disease with bronchial compression and unilateral hyperinflation	-1.36158	NA	NA	NA	NA	NA	NA	NA	NA	NA	NA	NA	NA	NA	NA	NA	NA	NA	NA	NA	NA	NA	NA	NA
GSE41055	GSM1008083	8.9	Female	NA	PTB	Venezuela	NA	NA	0	Whole Blood	NA	NA	NA	NA	NA	NA	NA	NA	NA	Negative	NA	NA	NA	Positive	Ghon focus with bilateral bronchopneumonic consolidation, lymph node disease with tracheal compression, pleural effusion	1.04673	NA	NA	NA	NA	NA	NA	NA	NA	NA	NA	NA	NA	NA	NA	NA	NA	NA	NA	NA	NA	NA	NA	NA
GSE41055	GSM1008084	10.5	Male	NA	PTB	Venezuela	NA	NA	15	Whole Blood	NA	NA	NA	NA	NA	NA	NA	NA	NA	Negative	NA	NA	NA	Positive	Adult-type disease with unilateral bronchopneumonic consolidation, lymph node disease with unilateral hyperinflation	0.25297	NA	NA	NA	NA	NA	NA	NA	NA	NA	NA	NA	NA	NA	NA	NA	NA	NA	NA	NA	NA	NA	NA	NA
GSE41055	GSM1008085	12.5	Female	NA	PTB	Venezuela	NA	NA	18	Whole Blood	NA	NA	NA	NA	NA	NA	NA	NA	NA	Negative	NA	NA	NA	Positive	Adult-type disease with unilateral cavitation, lymph node disease with lobar alveolar consolidation and unilateral hyperinflation	0.278447	NA	NA	NA	NA	NA	NA	NA	NA	NA	NA	NA	NA	NA	NA	NA	NA	NA	NA	NA	NA	NA	NA	NA
GSE41055	GSM1008086	14.5	Female	NA	PTB	Venezuela	NA	NA	14	Whole Blood	NA	NA	NA	NA	NA	NA	NA	NA	NA	Positive	NA	NA	NA	Positive	Adult-type disease with bilateral cavitation and unilateral bronchopneumonic consolidation	2.07681	NA	NA	NA	NA	NA	NA	NA	NA	NA	NA	NA	NA	NA	NA	NA	NA	NA	NA	NA	NA	NA	NA	NA
GSE54992	GSM1327526	NA	NA	NA	PTB	NA	NA	NA	NA	PBMC	NA	Baseline	TB1	NA	NA	NA	NA	NA	NA	NA	NA	NA	NA	NA	NA	-2.15998	Pre-treatment	NA	NA	NA	NA	NA	NA	NA	NA	NA	NA	NA	NA	NA	NA	NA	NA	NA	NA	NA	NA	NA	NA
GSE54992	GSM1327527	NA	NA	NA	PTB	NA	NA	NA	NA	PBMC	NA	Baseline	TB6	NA	NA	NA	NA	NA	NA	NA	NA	NA	NA	NA	NA	-0.721333	Pre-treatment	NA	NA	NA	NA	NA	NA	NA	NA	NA	NA	NA	NA	NA	NA	NA	NA	NA	NA	NA	NA	NA	NA
GSE54992	GSM1327528	NA	NA	NA	PTB	NA	NA	NA	NA	PBMC	NA	Baseline	TB9	NA	NA	NA	NA	NA	NA	NA	NA	NA	NA	NA	NA	-0.905171	Pre-treatment	NA	NA	NA	NA	NA	NA	NA	NA	NA	NA	NA	NA	NA	NA	NA	NA	NA	NA	NA	NA	NA	NA
GSE54992	GSM1327529	NA	NA	NA	PTB	NA	NA	NA	NA	PBMC	NA	Baseline	TB5	NA	NA	NA	NA	NA	NA	NA	NA	NA	NA	NA	NA	-0.144042	Pre-treatment	NA	NA	NA	NA	NA	NA	NA	NA	NA	NA	NA	NA	NA	NA	NA	NA	NA	NA	NA	NA	NA	NA
GSE54992	GSM1327530	NA	NA	NA	PTB	NA	NA	NA	NA	PBMC	NA	Baseline	TB7	NA	NA	NA	NA	NA	NA	NA	NA	NA	NA	NA	NA	-2.65668	Pre-treatment	NA	NA	NA	NA	NA	NA	NA	NA	NA	NA	NA	NA	NA	NA	NA	NA	NA	NA	NA	NA	NA	NA
GSE54992	GSM1327531	NA	NA	NA	PTB	NA	NA	NA	NA	PBMC	NA	Baseline	TB3	NA	NA	NA	NA	NA	NA	NA	NA	NA	NA	NA	NA	-0.169636	Pre-treatment	NA	NA	NA	NA	NA	NA	NA	NA	NA	NA	NA	NA	NA	NA	NA	NA	NA	NA	NA	NA	NA	NA
GSE54992	GSM1327532	NA	NA	NA	PTB	NA	NA	NA	NA	PBMC	NA	3 Month(s)	TB1	NA	NA	NA	NA	NA	NA	NA	NA	NA	NA	NA	NA	0.207932	anti-tuberculosis treatment	NA	NA	NA	NA	NA	NA	NA	NA	NA	NA	NA	NA	NA	NA	NA	NA	NA	NA	NA	NA	NA	NA
GSE54992	GSM1327533	NA	NA	NA	PTB	NA	NA	NA	NA	PBMC	NA	Baseline	TB2	NA	NA	NA	NA	NA	NA	NA	NA	NA	NA	NA	NA	-0.120946	Pre-treatment	NA	NA	NA	NA	NA	NA	NA	NA	NA	NA	NA	NA	NA	NA	NA	NA	NA	NA	NA	NA	NA	NA
GSE54992	GSM1327534	NA	NA	NA	PTB	NA	NA	NA	NA	PBMC	NA	3 Month(s)	TB6	NA	NA	NA	NA	NA	NA	NA	NA	NA	NA	NA	NA	0.712748	anti-tuberculosis treatment	NA	NA	NA	NA	NA	NA	NA	NA	NA	NA	NA	NA	NA	NA	NA	NA	NA	NA	NA	NA	NA	NA
GSE54992	GSM1327535	NA	NA	NA	PTB	NA	NA	NA	NA	PBMC	NA	Baseline	TB8	NA	NA	NA	NA	NA	NA	NA	NA	NA	NA	NA	NA	-0.0902706	Pre-treatment	NA	NA	NA	NA	NA	NA	NA	NA	NA	NA	NA	NA	NA	NA	NA	NA	NA	NA	NA	NA	NA	NA
GSE54992	GSM1327536	NA	NA	NA	PTB	NA	NA	NA	NA	PBMC	NA	3 Month(s)	TB9	NA	NA	NA	NA	NA	NA	NA	NA	NA	NA	NA	NA	-0.857015	anti-tuberculosis treatment	NA	NA	NA	NA	NA	NA	NA	NA	NA	NA	NA	NA	NA	NA	NA	NA	NA	NA	NA	NA	NA	NA
GSE54992	GSM1327537	NA	NA	NA	PTB	NA	NA	NA	NA	PBMC	NA	3 Month(s)	TB5	NA	NA	NA	NA	NA	NA	NA	NA	NA	NA	NA	NA	0.732883	anti-tuberculosis treatment	NA	NA	NA	NA	NA	NA	NA	NA	NA	NA	NA	NA	NA	NA	NA	NA	NA	NA	NA	NA	NA	NA
GSE54992	GSM1327538	NA	NA	NA	PTB	NA	NA	NA	NA	PBMC	NA	3 Month(s)	TB7	NA	NA	NA	NA	NA	NA	NA	NA	NA	NA	NA	NA	-0.538229	anti-tuberculosis treatment	NA	NA	NA	NA	NA	NA	NA	NA	NA	NA	NA	NA	NA	NA	NA	NA	NA	NA	NA	NA	NA	NA
GSE54992	GSM1327539	NA	NA	NA	LTBI	NA	NA	NA	NA	PBMC	NA	Baseline	LTBI6	NA	NA	NA	NA	NA	NA	NA	NA	NA	NA	NA	NA	1.17145	Untreated	NA	NA	NA	NA	NA	NA	NA	NA	NA	NA	NA	NA	NA	NA	NA	NA	NA	NA	NA	NA	NA	NA
GSE54992	GSM1327540	NA	NA	NA	PTB	NA	NA	NA	NA	PBMC	NA	Baseline	TB4	NA	NA	NA	NA	NA	NA	NA	NA	NA	NA	NA	NA	0.289857	Pre-treatment	NA	NA	NA	NA	NA	NA	NA	NA	NA	NA	NA	NA	NA	NA	NA	NA	NA	NA	NA	NA	NA	NA
GSE54992	GSM1327541	NA	NA	NA	Control	NA	NA	NA	NA	PBMC	NA	Baseline	HD6	NA	NA	NA	NA	NA	NA	NA	NA	NA	NA	NA	NA	1.07227	Untreated	NA	NA	NA	NA	NA	NA	NA	NA	NA	NA	NA	NA	NA	NA	NA	NA	NA	NA	NA	NA	NA	NA
GSE54992	GSM1327542	NA	NA	NA	Control	NA	NA	NA	NA	PBMC	NA	Baseline	HD5	NA	NA	NA	NA	NA	NA	NA	NA	NA	NA	NA	NA	0.566381	Untreated	NA	NA	NA	NA	NA	NA	NA	NA	NA	NA	NA	NA	NA	NA	NA	NA	NA	NA	NA	NA	NA	NA
GSE54992	GSM1327543	NA	NA	NA	LTBI	NA	NA	NA	NA	PBMC	NA	Baseline	LTBI2	NA	NA	NA	NA	NA	NA	NA	NA	NA	NA	NA	NA	0.954716	Untreated	NA	NA	NA	NA	NA	NA	NA	NA	NA	NA	NA	NA	NA	NA	NA	NA	NA	NA	NA	NA	NA	NA
GSE54992	GSM1327544	NA	NA	NA	Control	NA	NA	NA	NA	PBMC	NA	Baseline	HD1	NA	NA	NA	NA	NA	NA	NA	NA	NA	NA	NA	NA	1.13004	Untreated	NA	NA	NA	NA	NA	NA	NA	NA	NA	NA	NA	NA	NA	NA	NA	NA	NA	NA	NA	NA	NA	NA
GSE54992	GSM1327545	NA	NA	NA	LTBI	NA	NA	NA	NA	PBMC	NA	Baseline	LTBI3	NA	NA	NA	NA	NA	NA	NA	NA	NA	NA	NA	NA	1.23386	Untreated	NA	NA	NA	NA	NA	NA	NA	NA	NA	NA	NA	NA	NA	NA	NA	NA	NA	NA	NA	NA	NA	NA
GSE54992	GSM1327546	NA	NA	NA	Control	NA	NA	NA	NA	PBMC	NA	Baseline	HD3	NA	NA	NA	NA	NA	NA	NA	NA	NA	NA	NA	NA	0.535689	Untreated	NA	NA	NA	NA	NA	NA	NA	NA	NA	NA	NA	NA	NA	NA	NA	NA	NA	NA	NA	NA	NA	NA
GSE54992	GSM1327547	NA	NA	NA	LTBI	NA	NA	NA	NA	PBMC	NA	Baseline	LTBI4	NA	NA	NA	NA	NA	NA	NA	NA	NA	NA	NA	NA	0.346814	Untreated	NA	NA	NA	NA	NA	NA	NA	NA	NA	NA	NA	NA	NA	NA	NA	NA	NA	NA	NA	NA	NA	NA
GSE54992	GSM1327548	NA	NA	NA	LTBI	NA	NA	NA	NA	PBMC	NA	Baseline	LTBI1	NA	NA	NA	NA	NA	NA	NA	NA	NA	NA	NA	NA	0.653531	Untreated	NA	NA	NA	NA	NA	NA	NA	NA	NA	NA	NA	NA	NA	NA	NA	NA	NA	NA	NA	NA	NA	NA
GSE54992	GSM1327549	NA	NA	NA	Control	NA	NA	NA	NA	PBMC	NA	Baseline	HD2	NA	NA	NA	NA	NA	NA	NA	NA	NA	NA	NA	NA	1.00452	Untreated	NA	NA	NA	NA	NA	NA	NA	NA	NA	NA	NA	NA	NA	NA	NA	NA	NA	NA	NA	NA	NA	NA
GSE54992	GSM1327550	NA	NA	NA	Control	NA	NA	NA	NA	PBMC	NA	Baseline	HD4	NA	NA	NA	NA	NA	NA	NA	NA	NA	NA	NA	NA	1.40426	Untreated	NA	NA	NA	NA	NA	NA	NA	NA	NA	NA	NA	NA	NA	NA	NA	NA	NA	NA	NA	NA	NA	NA
GSE54992	GSM1327551	NA	NA	NA	LTBI	NA	NA	NA	NA	PBMC	NA	Baseline	LTBI5	NA	NA	NA	NA	NA	NA	NA	NA	NA	NA	NA	NA	0.839066	Untreated	NA	NA	NA	NA	NA	NA	NA	NA	NA	NA	NA	NA	NA	NA	NA	NA	NA	NA	NA	NA	NA	NA
GSE54992	GSM1327552	NA	NA	NA	PTB	NA	NA	NA	NA	PBMC	NA	6 Month(s)	TB1	NA	NA	NA	NA	NA	NA	NA	NA	NA	NA	NA	NA	-0.436104	anti-tuberculosis treatment	NA	NA	NA	NA	NA	NA	NA	NA	NA	NA	NA	NA	NA	NA	NA	NA	NA	NA	NA	NA	NA	NA
GSE54992	GSM1327553	NA	NA	NA	PTB	NA	NA	NA	NA	PBMC	NA	6 Month(s)	TB9	NA	NA	NA	NA	NA	NA	NA	NA	NA	NA	NA	NA	-0.454442	anti-tuberculosis treatment	NA	NA	NA	NA	NA	NA	NA	NA	NA	NA	NA	NA	NA	NA	NA	NA	NA	NA	NA	NA	NA	NA
GSE54992	GSM1327554	NA	NA	NA	PTB	NA	NA	NA	NA	PBMC	NA	3 Month(s)	TB3	NA	NA	NA	NA	NA	NA	NA	NA	NA	NA	NA	NA	-2.47186	anti-tuberculosis treatment	NA	NA	NA	NA	NA	NA	NA	NA	NA	NA	NA	NA	NA	NA	NA	NA	NA	NA	NA	NA	NA	NA
GSE54992	GSM1327555	NA	NA	NA	PTB	NA	NA	NA	NA	PBMC	NA	3 Month(s)	TB2	NA	NA	NA	NA	NA	NA	NA	NA	NA	NA	NA	NA	-0.150654	anti-tuberculosis treatment	NA	NA	NA	NA	NA	NA	NA	NA	NA	NA	NA	NA	NA	NA	NA	NA	NA	NA	NA	NA	NA	NA
GSE54992	GSM1327556	NA	NA	NA	PTB	NA	NA	NA	NA	PBMC	NA	6 Month(s)	TB6	NA	NA	NA	NA	NA	NA	NA	NA	NA	NA	NA	NA	-0.0369578	anti-tuberculosis treatment	NA	NA	NA	NA	NA	NA	NA	NA	NA	NA	NA	NA	NA	NA	NA	NA	NA	NA	NA	NA	NA	NA
GSE54992	GSM1327557	NA	NA	NA	PTB	NA	NA	NA	NA	PBMC	NA	3 Month(s)	TB8	NA	NA	NA	NA	NA	NA	NA	NA	NA	NA	NA	NA	0.379915	anti-tuberculosis treatment	NA	NA	NA	NA	NA	NA	NA	NA	NA	NA	NA	NA	NA	NA	NA	NA	NA	NA	NA	NA	NA	NA
GSE54992	GSM1327558	NA	NA	NA	PTB	NA	NA	NA	NA	PBMC	NA	6 Month(s)	TB5	NA	NA	NA	NA	NA	NA	NA	NA	NA	NA	NA	NA	-0.979843	anti-tuberculosis treatment	NA	NA	NA	NA	NA	NA	NA	NA	NA	NA	NA	NA	NA	NA	NA	NA	NA	NA	NA	NA	NA	NA
GSE54992	GSM1327559	NA	NA	NA	PTB	NA	NA	NA	NA	PBMC	NA	3 Month(s)	TB4	NA	NA	NA	NA	NA	NA	NA	NA	NA	NA	NA	NA	-0.47477	anti-tuberculosis treatment	NA	NA	NA	NA	NA	NA	NA	NA	NA	NA	NA	NA	NA	NA	NA	NA	NA	NA	NA	NA	NA	NA
GSE54992	GSM1327560	NA	NA	NA	PTB	NA	NA	NA	NA	PBMC	NA	6 Month(s)	TB7	NA	NA	NA	NA	NA	NA	NA	NA	NA	NA	NA	NA	-1.40736	anti-tuberculosis treatment	NA	NA	NA	NA	NA	NA	NA	NA	NA	NA	NA	NA	NA	NA	NA	NA	NA	NA	NA	NA	NA	NA
GSE54992	GSM1327561	NA	NA	NA	PTB	NA	NA	NA	NA	PBMC	NA	6 Month(s)	TB3	NA	NA	NA	NA	NA	NA	NA	NA	NA	NA	NA	NA	1.19583	anti-tuberculosis treatment	NA	NA	NA	NA	NA	NA	NA	NA	NA	NA	NA	NA	NA	NA	NA	NA	NA	NA	NA	NA	NA	NA
GSE54992	GSM1327562	NA	NA	NA	PTB	NA	NA	NA	NA	PBMC	NA	6 Month(s)	TB2	NA	NA	NA	NA	NA	NA	NA	NA	NA	NA	NA	NA	-0.254945	anti-tuberculosis treatment	NA	NA	NA	NA	NA	NA	NA	NA	NA	NA	NA	NA	NA	NA	NA	NA	NA	NA	NA	NA	NA	NA
GSE54992	GSM1327563	NA	NA	NA	PTB	NA	NA	NA	NA	PBMC	NA	6 Month(s)	TB8	NA	NA	NA	NA	NA	NA	NA	NA	NA	NA	NA	NA	0.4986	anti-tuberculosis treatment	NA	NA	NA	NA	NA	NA	NA	NA	NA	NA	NA	NA	NA	NA	NA	NA	NA	NA	NA	NA	NA	NA
GSE54992	GSM1327564	NA	NA	NA	PTB	NA	NA	NA	NA	PBMC	NA	6 Month(s)	TB4	NA	NA	NA	NA	NA	NA	NA	NA	NA	NA	NA	NA	0.099864	anti-tuberculosis treatment	NA	NA	NA	NA	NA	NA	NA	NA	NA	NA	NA	NA	NA	NA	NA	NA	NA	NA	NA	NA	NA	NA
GSE73408	GSM1892913	44	Female	White	PTB	USA	No	USA	NA	Whole Blood	NA	NA	NA	Negative	NA	NA	NA	NA	NA	NA	NA	NA	NA	NA	NA	0.378194	NA	Negative	Positive	NA	NA	NA	NA	NA	NA	NA	NA	NA	NA	NA	NA	NA	NA	NA	NA	NA	NA	NA	NA
GSE73408	GSM1892914	41	Male	Black	PTB	USA	Yes	Ethiopia	NA	Whole Blood	NA	NA	NA	Negative	NA	NA	NA	NA	NA	NA	NA	NA	NA	NA	NA	0.00702262	NA	Positive	Negative	NA	NA	NA	NA	NA	NA	NA	NA	NA	NA	NA	NA	NA	NA	NA	NA	NA	NA	NA	NA
GSE73408	GSM1892915	63	Male	Latino	PTB	USA	Unknown	Mexico	NA	Whole Blood	NA	NA	NA	Negative	NA	NA	NA	NA	NA	NA	NA	NA	NA	NA	NA	0.703312	NA	Positive	Negative	NA	NA	NA	NA	NA	NA	NA	NA	NA	NA	NA	NA	NA	NA	NA	NA	NA	NA	NA	NA
GSE73408	GSM1892916	75	Male	Asian	PTB	USA	No	Korea	NA	Whole Blood	NA	NA	NA	Negative	NA	NA	NA	NA	NA	NA	NA	NA	NA	NA	NA	0.920375	NA	Positive	Negative	NA	NA	NA	NA	NA	NA	NA	NA	NA	NA	NA	NA	NA	NA	NA	NA	NA	NA	NA	NA
GSE73408	GSM1892917	72	Male	Asian	PTB	USA	Unknown	China	NA	Whole Blood	NA	NA	NA	Negative	NA	NA	NA	NA	NA	NA	NA	NA	NA	NA	NA	0.661993	NA	Positive	Negative	NA	NA	NA	NA	NA	NA	NA	NA	NA	NA	NA	NA	NA	NA	NA	NA	NA	NA	NA	NA
GSE73408	GSM1892918	33	Male	Asian	PTB	USA	Yes	Burma	NA	Whole Blood	NA	NA	NA	Negative	NA	NA	NA	NA	NA	NA	NA	NA	NA	NA	NA	-0.492192	NA	Negative	Negative	NA	NA	NA	NA	NA	NA	NA	NA	NA	NA	NA	NA	NA	NA	NA	NA	NA	NA	NA	NA
GSE73408	GSM1892919	70	Female	Latino	PTB	USA	No	USA	NA	Whole Blood	NA	NA	NA	Negative	NA	NA	NA	NA	NA	NA	NA	NA	NA	NA	NA	1.18905	NA	Positive	Negative	NA	NA	NA	NA	NA	NA	NA	NA	NA	NA	NA	NA	NA	NA	NA	NA	NA	NA	NA	NA
GSE73408	GSM1892920	25	Female	Black	PTB	USA	Yes	Somalia	NA	Whole Blood	NA	NA	NA	Negative	NA	NA	NA	NA	NA	NA	NA	NA	NA	NA	NA	-0.968138	NA	Negative	Negative	NA	NA	NA	NA	NA	NA	NA	NA	NA	NA	NA	NA	NA	NA	NA	NA	NA	NA	NA	NA
GSE73408	GSM1892921	35	Female	Latino	PTB	USA	Yes	Mexico	NA	Whole Blood	NA	NA	NA	Negative	NA	NA	NA	NA	NA	NA	NA	NA	NA	NA	NA	-1.53542	NA	Negative	Negative	NA	NA	NA	NA	NA	NA	NA	NA	NA	NA	NA	NA	NA	NA	NA	NA	NA	NA	NA	NA
GSE73408	GSM1892922	55	Male	Asian	PTB	USA	No	Indonesia	NA	Whole Blood	NA	NA	NA	Negative	NA	NA	NA	NA	NA	NA	NA	NA	NA	NA	NA	1.12421	NA	Negative	Negative	NA	NA	NA	NA	NA	NA	NA	NA	NA	NA	NA	NA	NA	NA	NA	NA	NA	NA	NA	NA
GSE73408	GSM1892923	50	Female	Other	PTB	USA	Yes	Tonga	NA	Whole Blood	NA	NA	NA	Negative	NA	NA	NA	NA	NA	NA	NA	NA	NA	NA	NA	-0.491858	NA	Positive	Negative	NA	NA	NA	NA	NA	NA	NA	NA	NA	NA	NA	NA	NA	NA	NA	NA	NA	NA	NA	NA
GSE73408	GSM1892924	29	Male	Asian	PTB	USA	Unknown	Nepal	NA	Whole Blood	NA	NA	NA	Negative	NA	NA	NA	NA	NA	NA	NA	NA	NA	NA	NA	-1.13199	NA	Negative	Negative	NA	NA	NA	NA	NA	NA	NA	NA	NA	NA	NA	NA	NA	NA	NA	NA	NA	NA	NA	NA
GSE73408	GSM1892925	81	Male	White	PTB	USA	No	USA	NA	Whole Blood	NA	NA	NA	Negative	NA	NA	NA	NA	NA	NA	NA	NA	NA	NA	NA	-0.0484068	NA	Negative	Negative	NA	NA	NA	NA	NA	NA	NA	NA	NA	NA	NA	NA	NA	NA	NA	NA	NA	NA	NA	NA
GSE73408	GSM1892926	29	Female	Asian	PTB	USA	Unknown	Nepal	NA	Whole Blood	NA	NA	NA	Negative	NA	NA	NA	NA	NA	NA	NA	NA	NA	NA	NA	0.826777	NA	Negative	Negative	NA	NA	NA	NA	NA	NA	NA	NA	NA	NA	NA	NA	NA	NA	NA	NA	NA	NA	NA	NA
GSE73408	GSM1892927	47	Female	Latino	PTB	USA	No	USA	NA	Whole Blood	NA	NA	NA	Negative	NA	NA	NA	NA	NA	NA	NA	NA	NA	NA	NA	0.25373	NA	Negative	Negative	NA	NA	NA	NA	NA	NA	NA	NA	NA	NA	NA	NA	NA	NA	NA	NA	NA	NA	NA	NA
GSE73408	GSM1892928	36	Female	Latino	PTB	USA	Yes	Mexico	NA	Whole Blood	NA	NA	NA	Negative	NA	NA	NA	NA	NA	NA	NA	NA	NA	NA	NA	0.43563	NA	Positive	Negative	NA	NA	NA	NA	NA	NA	NA	NA	NA	NA	NA	NA	NA	NA	NA	NA	NA	NA	NA	NA
GSE73408	GSM1892929	64	Male	Latino	PTB	USA	No	USA	NA	Whole Blood	NA	NA	NA	Negative	NA	NA	NA	NA	NA	NA	NA	NA	NA	NA	NA	0.0105006	NA	Negative	Negative	NA	NA	NA	NA	NA	NA	NA	NA	NA	NA	NA	NA	NA	NA	NA	NA	NA	NA	NA	NA
GSE73408	GSM1892930	54	Male	Latino	PTB	USA	No	USA	NA	Whole Blood	NA	NA	NA	Negative	NA	NA	NA	NA	NA	NA	NA	NA	NA	NA	NA	-0.138639	NA	Positive	Positive	NA	NA	NA	NA	NA	NA	NA	NA	NA	NA	NA	NA	NA	NA	NA	NA	NA	NA	NA	NA
GSE73408	GSM1892931	67	Male	White	PTB	USA	No	USA	NA	Whole Blood	NA	NA	NA	Negative	NA	NA	NA	NA	NA	NA	NA	NA	NA	NA	NA	0.260398	NA	Negative	Positive	NA	NA	NA	NA	NA	NA	NA	NA	NA	NA	NA	NA	NA	NA	NA	NA	NA	NA	NA	NA
GSE73408	GSM1892932	53	Male	Latino	PTB	USA	Yes	Mexico	NA	Whole Blood	NA	NA	NA	Negative	NA	NA	NA	NA	NA	NA	NA	NA	NA	NA	NA	0.264521	NA	Negative	Negative	NA	NA	NA	NA	NA	NA	NA	NA	NA	NA	NA	NA	NA	NA	NA	NA	NA	NA	NA	NA
GSE73408	GSM1892933	46	Male	Latino	PTB	USA	Yes	Mexico	NA	Whole Blood	NA	NA	NA	Negative	NA	NA	NA	NA	NA	NA	NA	NA	NA	NA	NA	-1.22351	NA	Negative	Positive	NA	NA	NA	NA	NA	NA	NA	NA	NA	NA	NA	NA	NA	NA	NA	NA	NA	NA	NA	NA
GSE73408	GSM1892934	63	Male	Latino	PTB	USA	No	Mexico	NA	Whole Blood	NA	NA	NA	Negative	NA	NA	NA	NA	NA	NA	NA	NA	NA	NA	NA	-0.593527	NA	Positive	Positive	NA	NA	NA	NA	NA	NA	NA	NA	NA	NA	NA	NA	NA	NA	NA	NA	NA	NA	NA	NA
GSE73408	GSM1892935	51	Male	Latino	PTB	USA	No	USA	NA	Whole Blood	NA	NA	NA	Negative	NA	NA	NA	NA	NA	NA	NA	NA	NA	NA	NA	-0.198549	NA	Negative	Positive	NA	NA	NA	NA	NA	NA	NA	NA	NA	NA	NA	NA	NA	NA	NA	NA	NA	NA	NA	NA
GSE73408	GSM1892936	66	Female	Latino	PTB	USA	No	Mexico	NA	Whole Blood	NA	NA	NA	Negative	NA	NA	NA	NA	NA	NA	NA	NA	NA	NA	NA	0.249463	NA	Negative	Negative	NA	NA	NA	NA	NA	NA	NA	NA	NA	NA	NA	NA	NA	NA	NA	NA	NA	NA	NA	NA
GSE73408	GSM1892937	80	Male	Latino	PTB	USA	Yes	USA	NA	Whole Blood	NA	NA	NA	Negative	NA	NA	NA	NA	NA	NA	NA	NA	NA	NA	NA	-0.104625	NA	Negative	Positive	NA	NA	NA	NA	NA	NA	NA	NA	NA	NA	NA	NA	NA	NA	NA	NA	NA	NA	NA	NA
GSE73408	GSM1892938	43	Male	Latino	PTB	USA	Yes	Mexico	NA	Whole Blood	NA	NA	NA	Negative	NA	NA	NA	NA	NA	NA	NA	NA	NA	NA	NA	0.311616	NA	Positive	Negative	NA	NA	NA	NA	NA	NA	NA	NA	NA	NA	NA	NA	NA	NA	NA	NA	NA	NA	NA	NA
GSE73408	GSM1892939	50	Male	Latino	PTB	USA	Yes	USA	NA	Whole Blood	NA	NA	NA	Negative	NA	NA	NA	NA	NA	NA	NA	NA	NA	NA	NA	0.551044	NA	Positive	Negative	NA	NA	NA	NA	NA	NA	NA	NA	NA	NA	NA	NA	NA	NA	NA	NA	NA	NA	NA	NA
GSE73408	GSM1892940	59	Male	Latino	PTB	USA	Yes	Mexico	NA	Whole Blood	NA	NA	NA	Negative	NA	NA	NA	NA	NA	NA	NA	NA	NA	NA	NA	0.72987	NA	Positive	Negative	NA	NA	NA	NA	NA	NA	NA	NA	NA	NA	NA	NA	NA	NA	NA	NA	NA	NA	NA	NA
GSE73408	GSM1892941	85	Male	Latino	PTB	USA	Yes	Mexico	NA	Whole Blood	NA	NA	NA	Negative	NA	NA	NA	NA	NA	NA	NA	NA	NA	NA	NA	-0.322343	NA	Negative	Positive	NA	NA	NA	NA	NA	NA	NA	NA	NA	NA	NA	NA	NA	NA	NA	NA	NA	NA	NA	NA
GSE73408	GSM1892942	25	Male	Latino	PTB	USA	No	Mexico	NA	Whole Blood	NA	NA	NA	Negative	NA	NA	NA	NA	NA	NA	NA	NA	NA	NA	NA	0.372759	NA	Negative	Positive	NA	NA	NA	NA	NA	NA	NA	NA	NA	NA	NA	NA	NA	NA	NA	NA	NA	NA	NA	NA
GSE73408	GSM1892943	25	Male	Latino	PTB	USA	No	Mexico	NA	Whole Blood	NA	NA	NA	Negative	NA	NA	NA	NA	NA	NA	NA	NA	NA	NA	NA	-0.579498	NA	Negative	Negative	NA	NA	NA	NA	NA	NA	NA	NA	NA	NA	NA	NA	NA	NA	NA	NA	NA	NA	NA	NA
GSE73408	GSM1892944	22	Female	Latino	PTB	USA	No	USA	NA	Whole Blood	NA	NA	NA	Negative	NA	NA	NA	NA	NA	NA	NA	NA	NA	NA	NA	0.225579	NA	Negative	Negative	NA	NA	NA	NA	NA	NA	NA	NA	NA	NA	NA	NA	NA	NA	NA	NA	NA	NA	NA	NA
GSE73408	GSM1892945	24	Male	Latino	PTB	USA	No	USA	NA	Whole Blood	NA	NA	NA	Negative	NA	NA	NA	NA	NA	NA	NA	NA	NA	NA	NA	0.337519	NA	Negative	Positive	NA	NA	NA	NA	NA	NA	NA	NA	NA	NA	NA	NA	NA	NA	NA	NA	NA	NA	NA	NA
GSE73408	GSM1892946	20	Male	Latino	PTB	USA	No	USA	NA	Whole Blood	NA	NA	NA	Negative	NA	NA	NA	NA	NA	NA	NA	NA	NA	NA	NA	0.0743574	NA	Negative	Negative	NA	NA	NA	NA	NA	NA	NA	NA	NA	NA	NA	NA	NA	NA	NA	NA	NA	NA	NA	NA
GSE73408	GSM1892947	27	Male	Latino	PTB	USA	Yes	Mexico	NA	Whole Blood	NA	NA	NA	Negative	NA	NA	NA	NA	NA	NA	NA	NA	NA	NA	NA	0.560906	NA	Negative	Negative	NA	NA	NA	NA	NA	NA	NA	NA	NA	NA	NA	NA	NA	NA	NA	NA	NA	NA	NA	NA
GSE73408	GSM1892948	45	Male	Asian	LTBI	USA	Yes	Philippines	NA	Whole Blood	NA	NA	NA	Negative	NA	NA	NA	NA	NA	NA	NA	NA	NA	NA	NA	-3.03182	NA	Negative	Positive	NA	NA	NA	NA	NA	NA	NA	NA	NA	NA	NA	NA	NA	NA	NA	NA	NA	NA	NA	NA
GSE73408	GSM1892949	36	Male	Black	LTBI	USA	Yes	Ethiopia	NA	Whole Blood	NA	NA	NA	Negative	NA	NA	NA	NA	NA	NA	NA	NA	NA	NA	NA	-1.76012	NA	Negative	Negative	NA	NA	NA	NA	NA	NA	NA	NA	NA	NA	NA	NA	NA	NA	NA	NA	NA	NA	NA	NA
GSE73408	GSM1892950	26	Male	Other	LTBI	USA	Yes	Iraq	NA	Whole Blood	NA	NA	NA	Negative	NA	NA	NA	NA	NA	NA	NA	NA	NA	NA	NA	-0.0516783	NA	Negative	Positive	NA	NA	NA	NA	NA	NA	NA	NA	NA	NA	NA	NA	NA	NA	NA	NA	NA	NA	NA	NA
GSE73408	GSM1892951	21	Female	Latino	LTBI	USA	Unknown	Mexico	NA	Whole Blood	NA	NA	NA	Negative	NA	NA	NA	NA	NA	NA	NA	NA	NA	NA	NA	-0.388205	NA	Negative	Negative	NA	NA	NA	NA	NA	NA	NA	NA	NA	NA	NA	NA	NA	NA	NA	NA	NA	NA	NA	NA
GSE73408	GSM1892952	36	Male	Asian	LTBI	USA	Yes	Burma	NA	Whole Blood	NA	NA	NA	Negative	NA	NA	NA	NA	NA	NA	NA	NA	NA	NA	NA	-0.454094	NA	Negative	Negative	NA	NA	NA	NA	NA	NA	NA	NA	NA	NA	NA	NA	NA	NA	NA	NA	NA	NA	NA	NA
GSE73408	GSM1892953	65	Female	Asian	LTBI	USA	No	Bhutan	NA	Whole Blood	NA	NA	NA	Negative	NA	NA	NA	NA	NA	NA	NA	NA	NA	NA	NA	-2.29983	NA	Negative	Negative	NA	NA	NA	NA	NA	NA	NA	NA	NA	NA	NA	NA	NA	NA	NA	NA	NA	NA	NA	NA
GSE73408	GSM1892954	32	Male	Asian	LTBI	USA	Yes	Burma	NA	Whole Blood	NA	NA	NA	Negative	NA	NA	NA	NA	NA	NA	NA	NA	NA	NA	NA	-0.368154	NA	Negative	Negative	NA	NA	NA	NA	NA	NA	NA	NA	NA	NA	NA	NA	NA	NA	NA	NA	NA	NA	NA	NA
GSE73408	GSM1892955	65	Male	Asian	LTBI	USA	Unknown	Bhutan	NA	Whole Blood	NA	NA	NA	Negative	NA	NA	NA	NA	NA	NA	NA	NA	NA	NA	NA	-0.897253	NA	Negative	Positive	NA	NA	NA	NA	NA	NA	NA	NA	NA	NA	NA	NA	NA	NA	NA	NA	NA	NA	NA	NA
GSE73408	GSM1892956	62	Female	Asian	LTBI	USA	No	Bhutan	NA	Whole Blood	NA	NA	NA	Negative	NA	NA	NA	NA	NA	NA	NA	NA	NA	NA	NA	-0.816759	NA	Positive	Negative	NA	NA	NA	NA	NA	NA	NA	NA	NA	NA	NA	NA	NA	NA	NA	NA	NA	NA	NA	NA
GSE73408	GSM1892957	48	Male	Asian	LTBI	USA	Yes	Burma	NA	Whole Blood	NA	NA	NA	Negative	NA	NA	NA	NA	NA	NA	NA	NA	NA	NA	NA	-1.28973	NA	Negative	Positive	NA	NA	NA	NA	NA	NA	NA	NA	NA	NA	NA	NA	NA	NA	NA	NA	NA	NA	NA	NA
GSE73408	GSM1892958	39	Male	Asian	LTBI	USA	Yes	Indonesia	NA	Whole Blood	NA	NA	NA	Negative	NA	NA	NA	NA	NA	NA	NA	NA	NA	NA	NA	-1.18327	NA	Negative	Negative	NA	NA	NA	NA	NA	NA	NA	NA	NA	NA	NA	NA	NA	NA	NA	NA	NA	NA	NA	NA
GSE73408	GSM1892959	28	Male	Black	LTBI	USA	Unknown	Eritrea	NA	Whole Blood	NA	NA	NA	Negative	NA	NA	NA	NA	NA	NA	NA	NA	NA	NA	NA	-0.910223	NA	Negative	Negative	NA	NA	NA	NA	NA	NA	NA	NA	NA	NA	NA	NA	NA	NA	NA	NA	NA	NA	NA	NA
GSE73408	GSM1892960	26	Male	Other	LTBI	USA	Unknown	Eritrea	NA	Whole Blood	NA	NA	NA	Negative	NA	NA	NA	NA	NA	NA	NA	NA	NA	NA	NA	-0.681989	NA	Negative	Negative	NA	NA	NA	NA	NA	NA	NA	NA	NA	NA	NA	NA	NA	NA	NA	NA	NA	NA	NA	NA
GSE73408	GSM1892961	53	Female	Black	LTBI	USA	No	USA	NA	Whole Blood	NA	NA	NA	Negative	NA	NA	NA	NA	NA	NA	NA	NA	NA	NA	NA	-1.14877	NA	Negative	Positive	NA	NA	NA	NA	NA	NA	NA	NA	NA	NA	NA	NA	NA	NA	NA	NA	NA	NA	NA	NA
GSE73408	GSM1892962	41	Male	Other	LTBI	USA	Yes	Eritrea	NA	Whole Blood	NA	NA	NA	Negative	NA	NA	NA	NA	NA	NA	NA	NA	NA	NA	NA	-1.54676	NA	Negative	Negative	NA	NA	NA	NA	NA	NA	NA	NA	NA	NA	NA	NA	NA	NA	NA	NA	NA	NA	NA	NA
GSE73408	GSM1892963	34	Male	Asian	LTBI	USA	Unknown	Burma	NA	Whole Blood	NA	NA	NA	Negative	NA	NA	NA	NA	NA	NA	NA	NA	NA	NA	NA	0.26596	NA	Negative	Negative	NA	NA	NA	NA	NA	NA	NA	NA	NA	NA	NA	NA	NA	NA	NA	NA	NA	NA	NA	NA
GSE73408	GSM1892964	55	Female	Other	LTBI	USA	Yes	Eritrea	NA	Whole Blood	NA	NA	NA	Negative	NA	NA	NA	NA	NA	NA	NA	NA	NA	NA	NA	-1.63544	NA	Positive	Negative	NA	NA	NA	NA	NA	NA	NA	NA	NA	NA	NA	NA	NA	NA	NA	NA	NA	NA	NA	NA
GSE73408	GSM1892965	35	Female	Black	LTBI	USA	Yes	Ethiopia	NA	Whole Blood	NA	NA	NA	Negative	NA	NA	NA	NA	NA	NA	NA	NA	NA	NA	NA	-1.40038	NA	Negative	Negative	NA	NA	NA	NA	NA	NA	NA	NA	NA	NA	NA	NA	NA	NA	NA	NA	NA	NA	NA	NA
GSE73408	GSM1892966	43	Male	Black	LTBI	USA	Yes	Ethiopia	NA	Whole Blood	NA	NA	NA	Negative	NA	NA	NA	NA	NA	NA	NA	NA	NA	NA	NA	-0.910626	NA	Negative	Negative	NA	NA	NA	NA	NA	NA	NA	NA	NA	NA	NA	NA	NA	NA	NA	NA	NA	NA	NA	NA
GSE73408	GSM1892967	21	Female	Asian	LTBI	USA	Unknown	Vietnam	NA	Whole Blood	NA	NA	NA	Negative	NA	NA	NA	NA	NA	NA	NA	NA	NA	NA	NA	-1.13187	NA	Negative	Negative	NA	NA	NA	NA	NA	NA	NA	NA	NA	NA	NA	NA	NA	NA	NA	NA	NA	NA	NA	NA
GSE73408	GSM1892968	26	Male	Asian	LTBI	USA	No	Bhutan	NA	Whole Blood	NA	NA	NA	Negative	NA	NA	NA	NA	NA	NA	NA	NA	NA	NA	NA	-0.362576	NA	Negative	Negative	NA	NA	NA	NA	NA	NA	NA	NA	NA	NA	NA	NA	NA	NA	NA	NA	NA	NA	NA	NA
GSE73408	GSM1892969	30	Female	Asian	LTBI	USA	Yes	China	NA	Whole Blood	NA	NA	NA	Negative	NA	NA	NA	NA	NA	NA	NA	NA	NA	NA	NA	-0.178642	NA	Negative	Negative	NA	NA	NA	NA	NA	NA	NA	NA	NA	NA	NA	NA	NA	NA	NA	NA	NA	NA	NA	NA
GSE73408	GSM1892970	32	Male	Other	LTBI	USA	Unknown	Sudan	NA	Whole Blood	NA	NA	NA	Negative	NA	NA	NA	NA	NA	NA	NA	NA	NA	NA	NA	-1.15055	NA	Negative	Negative	NA	NA	NA	NA	NA	NA	NA	NA	NA	NA	NA	NA	NA	NA	NA	NA	NA	NA	NA	NA
GSE73408	GSM1892971	39	Female	Latino	LTBI	USA	Yes	Mexico	NA	Whole Blood	NA	NA	NA	Negative	NA	NA	NA	NA	NA	NA	NA	NA	NA	NA	NA	-1.33391	NA	Negative	Negative	NA	NA	NA	NA	NA	NA	NA	NA	NA	NA	NA	NA	NA	NA	NA	NA	NA	NA	NA	NA
GSE73408	GSM1892972	36	Female	Latino	LTBI	USA	Unknown	USA	NA	Whole Blood	NA	NA	NA	Negative	NA	NA	NA	NA	NA	NA	NA	NA	NA	NA	NA	-0.844317	NA	Negative	Negative	NA	NA	NA	NA	NA	NA	NA	NA	NA	NA	NA	NA	NA	NA	NA	NA	NA	NA	NA	NA
GSE73408	GSM1892973	67	Male	Asian	LTBI	USA	No	Nepal	NA	Whole Blood	NA	NA	NA	Negative	NA	NA	NA	NA	NA	NA	NA	NA	NA	NA	NA	-0.698476	NA	Negative	Negative	NA	NA	NA	NA	NA	NA	NA	NA	NA	NA	NA	NA	NA	NA	NA	NA	NA	NA	NA	NA
GSE73408	GSM1892974	46	Female	White	LTBI	USA	Yes	France	NA	Whole Blood	NA	NA	NA	Negative	NA	NA	NA	NA	NA	NA	NA	NA	NA	NA	NA	-0.496362	NA	Negative	Negative	NA	NA	NA	NA	NA	NA	NA	NA	NA	NA	NA	NA	NA	NA	NA	NA	NA	NA	NA	NA
GSE73408	GSM1892975	27	Male	Black	LTBI	USA	Unknown	Ghana	NA	Whole Blood	NA	NA	NA	Negative	NA	NA	NA	NA	NA	NA	NA	NA	NA	NA	NA	-0.817537	NA	Negative	Negative	NA	NA	NA	NA	NA	NA	NA	NA	NA	NA	NA	NA	NA	NA	NA	NA	NA	NA	NA	NA
GSE73408	GSM1892976	27	Female	Asian	LTBI	USA	No	Vietnam	NA	Whole Blood	NA	NA	NA	Negative	NA	NA	NA	NA	NA	NA	NA	NA	NA	NA	NA	-1.56784	NA	Negative	Negative	NA	NA	NA	NA	NA	NA	NA	NA	NA	NA	NA	NA	NA	NA	NA	NA	NA	NA	NA	NA
GSE73408	GSM1892977	77	Male	Latino	LTBI	USA	Yes	Mexico DF	NA	Whole Blood	NA	NA	NA	Negative	NA	NA	NA	NA	NA	NA	NA	NA	NA	NA	NA	-1.17786	NA	Negative	Positive	NA	NA	NA	NA	NA	NA	NA	NA	NA	NA	NA	NA	NA	NA	NA	NA	NA	NA	NA	NA
GSE73408	GSM1892978	30	Female	Latino	LTBI	USA	No	USA	NA	Whole Blood	NA	NA	NA	Negative	NA	NA	NA	NA	NA	NA	NA	NA	NA	NA	NA	0.269153	NA	Negative	Positive	NA	NA	NA	NA	NA	NA	NA	NA	NA	NA	NA	NA	NA	NA	NA	NA	NA	NA	NA	NA
GSE73408	GSM1892979	24	Female	Latino	LTBI	USA	No	USA	NA	Whole Blood	NA	NA	NA	Negative	NA	NA	NA	NA	NA	NA	NA	NA	NA	NA	NA	-0.0294068	NA	Negative	Positive	NA	NA	NA	NA	NA	NA	NA	NA	NA	NA	NA	NA	NA	NA	NA	NA	NA	NA	NA	NA
GSE73408	GSM1892980	36	Female	Latino	LTBI	USA	No	Mexico	NA	Whole Blood	NA	NA	NA	Negative	NA	NA	NA	NA	NA	NA	NA	NA	NA	NA	NA	0.191624	NA	Positive	Negative	NA	NA	NA	NA	NA	NA	NA	NA	NA	NA	NA	NA	NA	NA	NA	NA	NA	NA	NA	NA
GSE73408	GSM1892981	41	Female	Latino	LTBI	USA	No	USA	NA	Whole Blood	NA	NA	NA	Negative	NA	NA	NA	NA	NA	NA	NA	NA	NA	NA	NA	-0.445536	NA	Negative	Negative	NA	NA	NA	NA	NA	NA	NA	NA	NA	NA	NA	NA	NA	NA	NA	NA	NA	NA	NA	NA
GSE73408	GSM1892982	39	Female	Latino	LTBI	USA	Yes	Mexico	NA	Whole Blood	NA	NA	NA	Negative	NA	NA	NA	NA	NA	NA	NA	NA	NA	NA	NA	-0.377185	NA	Negative	Negative	NA	NA	NA	NA	NA	NA	NA	NA	NA	NA	NA	NA	NA	NA	NA	NA	NA	NA	NA	NA
GSE73408	GSM1892983	29	Male	White	OD	USA	No	USA	NA	Whole Blood	NA	NA	NA	Negative	NA	NA	NA	NA	NA	NA	NA	NA	NA	NA	NA	1.1555	NA	Negative	Positive	NA	NA	NA	NA	NA	NA	NA	NA	NA	NA	NA	NA	NA	NA	NA	NA	NA	NA	NA	NA
GSE73408	GSM1892984	38	Female	Latino	OD	USA	No	Mexico	NA	Whole Blood	NA	NA	NA	Negative	NA	NA	NA	NA	NA	NA	NA	NA	NA	NA	NA	1.55825	NA	Negative	Negative	NA	NA	NA	NA	NA	NA	NA	NA	NA	NA	NA	NA	NA	NA	NA	NA	NA	NA	NA	NA
GSE73408	GSM1892985	59	Female	Latino	OD	USA	No	Mexico	NA	Whole Blood	NA	NA	NA	Negative	NA	NA	NA	NA	NA	NA	NA	NA	NA	NA	NA	-1.31608	NA	Positive	Negative	NA	NA	NA	NA	NA	NA	NA	NA	NA	NA	NA	NA	NA	NA	NA	NA	NA	NA	NA	NA
GSE73408	GSM1892986	42	Male	Latino	OD	USA	No	USA	NA	Whole Blood	NA	NA	NA	Negative	NA	NA	NA	NA	NA	NA	NA	NA	NA	NA	NA	0.420286	NA	Negative	Negative	NA	NA	NA	NA	NA	NA	NA	NA	NA	NA	NA	NA	NA	NA	NA	NA	NA	NA	NA	NA
GSE73408	GSM1892987	49	Female	Other	OD	USA	Unknown	USA	NA	Whole Blood	NA	NA	NA	Negative	NA	NA	NA	NA	NA	NA	NA	NA	NA	NA	NA	2.1208	NA	Negative	Positive	NA	NA	NA	NA	NA	NA	NA	NA	NA	NA	NA	NA	NA	NA	NA	NA	NA	NA	NA	NA
GSE73408	GSM1892988	21	Female	Asian	OD	USA	No	Mongolia	NA	Whole Blood	NA	NA	NA	Negative	NA	NA	NA	NA	NA	NA	NA	NA	NA	NA	NA	0.278371	NA	Negative	Negative	NA	NA	NA	NA	NA	NA	NA	NA	NA	NA	NA	NA	NA	NA	NA	NA	NA	NA	NA	NA
GSE73408	GSM1892989	39	Male	Latino	OD	USA	No	USA	NA	Whole Blood	NA	NA	NA	Negative	NA	NA	NA	NA	NA	NA	NA	NA	NA	NA	NA	0.291788	NA	Negative	Positive	NA	NA	NA	NA	NA	NA	NA	NA	NA	NA	NA	NA	NA	NA	NA	NA	NA	NA	NA	NA
GSE73408	GSM1892990	63	Female	Latino	OD	USA	No	USA	NA	Whole Blood	NA	NA	NA	Negative	NA	NA	NA	NA	NA	NA	NA	NA	NA	NA	NA	0.273345	NA	Negative	Positive	NA	NA	NA	NA	NA	NA	NA	NA	NA	NA	NA	NA	NA	NA	NA	NA	NA	NA	NA	NA
GSE73408	GSM1892991	67	Male	White	OD	USA	No	USA	NA	Whole Blood	NA	NA	NA	Negative	NA	NA	NA	NA	NA	NA	NA	NA	NA	NA	NA	0.764981	NA	Negative	Positive	NA	NA	NA	NA	NA	NA	NA	NA	NA	NA	NA	NA	NA	NA	NA	NA	NA	NA	NA	NA
GSE73408	GSM1892992	53	Male	Latino	OD	USA	No	USA	NA	Whole Blood	NA	NA	NA	Negative	NA	NA	NA	NA	NA	NA	NA	NA	NA	NA	NA	1.81102	NA	Negative	Negative	NA	NA	NA	NA	NA	NA	NA	NA	NA	NA	NA	NA	NA	NA	NA	NA	NA	NA	NA	NA
GSE73408	GSM1892993	69	Male	Other	OD	USA	No	USA	NA	Whole Blood	NA	NA	NA	Negative	NA	NA	NA	NA	NA	NA	NA	NA	NA	NA	NA	0.378609	NA	Positive	Negative	NA	NA	NA	NA	NA	NA	NA	NA	NA	NA	NA	NA	NA	NA	NA	NA	NA	NA	NA	NA
GSE73408	GSM1892994	78	Female	Other	OD	USA	No	USA	NA	Whole Blood	NA	NA	NA	Negative	NA	NA	NA	NA	NA	NA	NA	NA	NA	NA	NA	0.156844	NA	Negative	Negative	NA	NA	NA	NA	NA	NA	NA	NA	NA	NA	NA	NA	NA	NA	NA	NA	NA	NA	NA	NA
GSE73408	GSM1892995	69	Female	Latino	OD	USA	No	Mexico	NA	Whole Blood	NA	NA	NA	Negative	NA	NA	NA	NA	NA	NA	NA	NA	NA	NA	NA	0.70952	NA	Positive	Negative	NA	NA	NA	NA	NA	NA	NA	NA	NA	NA	NA	NA	NA	NA	NA	NA	NA	NA	NA	NA
GSE73408	GSM1892996	46	Male	White	OD	USA	No	USA	NA	Whole Blood	NA	NA	NA	Negative	NA	NA	NA	NA	NA	NA	NA	NA	NA	NA	NA	1.22291	NA	Negative	Positive	NA	NA	NA	NA	NA	NA	NA	NA	NA	NA	NA	NA	NA	NA	NA	NA	NA	NA	NA	NA
GSE73408	GSM1892997	75	Female	Latino	OD	USA	Yes	El Salvador	NA	Whole Blood	NA	NA	NA	Negative	NA	NA	NA	NA	NA	NA	NA	NA	NA	NA	NA	0.576007	NA	Positive	Negative	NA	NA	NA	NA	NA	NA	NA	NA	NA	NA	NA	NA	NA	NA	NA	NA	NA	NA	NA	NA
GSE73408	GSM1892998	79	Male	Latino	OD	USA	Yes	Mexico	NA	Whole Blood	NA	NA	NA	Negative	NA	NA	NA	NA	NA	NA	NA	NA	NA	NA	NA	2.16865	NA	Negative	Negative	NA	NA	NA	NA	NA	NA	NA	NA	NA	NA	NA	NA	NA	NA	NA	NA	NA	NA	NA	NA
GSE73408	GSM1892999	54	Male	Black	OD	USA	Unknown	USA	NA	Whole Blood	NA	NA	NA	Negative	NA	NA	NA	NA	NA	NA	NA	NA	NA	NA	NA	1.75536	NA	Negative	Positive	NA	NA	NA	NA	NA	NA	NA	NA	NA	NA	NA	NA	NA	NA	NA	NA	NA	NA	NA	NA
GSE73408	GSM1893000	86	Male	Other	OD	USA	Unknown	Sierra Leone	NA	Whole Blood	NA	NA	NA	Negative	NA	NA	NA	NA	NA	NA	NA	NA	NA	NA	NA	0.644634	NA	Negative	Negative	NA	NA	NA	NA	NA	NA	NA	NA	NA	NA	NA	NA	NA	NA	NA	NA	NA	NA	NA	NA
GSE73408	GSM1893001	61	Male	Latino	OD	USA	Yes	Mexico	NA	Whole Blood	NA	NA	NA	Negative	NA	NA	NA	NA	NA	NA	NA	NA	NA	NA	NA	1.25399	NA	Negative	Negative	NA	NA	NA	NA	NA	NA	NA	NA	NA	NA	NA	NA	NA	NA	NA	NA	NA	NA	NA	NA
GSE73408	GSM1893002	53	Male	Latino	OD	USA	No	USA	NA	Whole Blood	NA	NA	NA	Negative	NA	NA	NA	NA	NA	NA	NA	NA	NA	NA	NA	-0.62681	NA	Positive	Negative	NA	NA	NA	NA	NA	NA	NA	NA	NA	NA	NA	NA	NA	NA	NA	NA	NA	NA	NA	NA
GSE73408	GSM1893003	79	Male	Asian	OD	USA	No	Vietnam	NA	Whole Blood	NA	NA	NA	Negative	NA	NA	NA	NA	NA	NA	NA	NA	NA	NA	NA	1.93621	NA	Negative	Positive	NA	NA	NA	NA	NA	NA	NA	NA	NA	NA	NA	NA	NA	NA	NA	NA	NA	NA	NA	NA
GSE73408	GSM1893004	51	Female	White	OD	USA	No	USA	NA	Whole Blood	NA	NA	NA	Negative	NA	NA	NA	NA	NA	NA	NA	NA	NA	NA	NA	1.02973	NA	Negative	Negative	NA	NA	NA	NA	NA	NA	NA	NA	NA	NA	NA	NA	NA	NA	NA	NA	NA	NA	NA	NA
GSE73408	GSM1893005	41	Female	White	OD	USA	No	USA	NA	Whole Blood	NA	NA	NA	Negative	NA	NA	NA	NA	NA	NA	NA	NA	NA	NA	NA	1.14167	NA	Negative	Positive	NA	NA	NA	NA	NA	NA	NA	NA	NA	NA	NA	NA	NA	NA	NA	NA	NA	NA	NA	NA
GSE73408	GSM1893006	70	Female	Black	OD	USA	Unknown	USA	NA	Whole Blood	NA	NA	NA	Negative	NA	NA	NA	NA	NA	NA	NA	NA	NA	NA	NA	0.753271	NA	Positive	Negative	NA	NA	NA	NA	NA	NA	NA	NA	NA	NA	NA	NA	NA	NA	NA	NA	NA	NA	NA	NA
GSE73408	GSM1893007	24	Male	Black	OD	USA	No	USA	NA	Whole Blood	NA	NA	NA	Negative	NA	NA	NA	NA	NA	NA	NA	NA	NA	NA	NA	-0.413792	NA	Negative	Negative	NA	NA	NA	NA	NA	NA	NA	NA	NA	NA	NA	NA	NA	NA	NA	NA	NA	NA	NA	NA
GSE73408	GSM1893008	59	Male	Black	OD	USA	No	USA	NA	Whole Blood	NA	NA	NA	Negative	NA	NA	NA	NA	NA	NA	NA	NA	NA	NA	NA	0.300267	NA	Negative	Negative	NA	NA	NA	NA	NA	NA	NA	NA	NA	NA	NA	NA	NA	NA	NA	NA	NA	NA	NA	NA
GSE73408	GSM1893009	49	Female	White	OD	USA	No	USA	NA	Whole Blood	NA	NA	NA	Negative	NA	NA	NA	NA	NA	NA	NA	NA	NA	NA	NA	-0.39767	NA	Negative	Negative	NA	NA	NA	NA	NA	NA	NA	NA	NA	NA	NA	NA	NA	NA	NA	NA	NA	NA	NA	NA
GSE73408	GSM1893010	45	Female	White	OD	USA	No	USA	NA	Whole Blood	NA	NA	NA	Negative	NA	NA	NA	NA	NA	NA	NA	NA	NA	NA	NA	1.68818	NA	Negative	Positive	NA	NA	NA	NA	NA	NA	NA	NA	NA	NA	NA	NA	NA	NA	NA	NA	NA	NA	NA	NA
GSE73408	GSM1893011	44	Male	Latino	OD	USA	Yes	Mexico	NA	Whole Blood	NA	NA	NA	Negative	NA	NA	NA	NA	NA	NA	NA	NA	NA	NA	NA	-0.296712	NA	Negative	Negative	NA	NA	NA	NA	NA	NA	NA	NA	NA	NA	NA	NA	NA	NA	NA	NA	NA	NA	NA	NA
GSE73408	GSM1893012	46	Male	Other	OD	USA	No	USA	NA	Whole Blood	NA	NA	NA	Negative	NA	NA	NA	NA	NA	NA	NA	NA	NA	NA	NA	1.30499	NA	Positive	Negative	NA	NA	NA	NA	NA	NA	NA	NA	NA	NA	NA	NA	NA	NA	NA	NA	NA	NA	NA	NA
GSE73408	GSM1893013	63	Male	Latino	OD	USA	Unknown	Mexico	NA	Whole Blood	NA	NA	NA	Negative	NA	NA	NA	NA	NA	NA	NA	NA	NA	NA	NA	-0.747251	NA	Negative	Positive	NA	NA	NA	NA	NA	NA	NA	NA	NA	NA	NA	NA	NA	NA	NA	NA	NA	NA	NA	NA
GSE73408	GSM1893014	40	Male	Latino	OD	USA	Yes	Mexico	NA	Whole Blood	NA	NA	NA	Negative	NA	NA	NA	NA	NA	NA	NA	NA	NA	NA	NA	0.00798983	NA	Negative	Positive	NA	NA	NA	NA	NA	NA	NA	NA	NA	NA	NA	NA	NA	NA	NA	NA	NA	NA	NA	NA
GSE73408	GSM1893015	47	Male	Black	OD	USA	No	USA	NA	Whole Blood	NA	NA	NA	Negative	NA	NA	NA	NA	NA	NA	NA	NA	NA	NA	NA	0.428149	NA	Positive	Positive	NA	NA	NA	NA	NA	NA	NA	NA	NA	NA	NA	NA	NA	NA	NA	NA	NA	NA	NA	NA
GSE73408	GSM1893016	46	Male	White	OD	USA	Unknown	USA	NA	Whole Blood	NA	NA	NA	Negative	NA	NA	NA	NA	NA	NA	NA	NA	NA	NA	NA	0.0538228	NA	Negative	Positive	NA	NA	NA	NA	NA	NA	NA	NA	NA	NA	NA	NA	NA	NA	NA	NA	NA	NA	NA	NA
GSE73408	GSM1893017	57	Female	White	OD	USA	No	USA	NA	Whole Blood	NA	NA	NA	Negative	NA	NA	NA	NA	NA	NA	NA	NA	NA	NA	NA	1.86382	NA	Negative	Positive	NA	NA	NA	NA	NA	NA	NA	NA	NA	NA	NA	NA	NA	NA	NA	NA	NA	NA	NA	NA
GSE73408	GSM1893018	40	Male	White	OD	USA	No	USA	NA	Whole Blood	NA	NA	NA	Negative	NA	NA	NA	NA	NA	NA	NA	NA	NA	NA	NA	1.869	NA	Negative	Negative	NA	NA	NA	NA	NA	NA	NA	NA	NA	NA	NA	NA	NA	NA	NA	NA	NA	NA	NA	NA
GSE73408	GSM1893019	38	Female	White	OD	USA	No	USA	NA	Whole Blood	NA	NA	NA	Negative	NA	NA	NA	NA	NA	NA	NA	NA	NA	NA	NA	1.06039	NA	Negative	Negative	NA	NA	NA	NA	NA	NA	NA	NA	NA	NA	NA	NA	NA	NA	NA	NA	NA	NA	NA	NA
GSE73408	GSM1893020	48	Male	Latino	OD	USA	No	USA	NA	Whole Blood	NA	NA	NA	Negative	NA	NA	NA	NA	NA	NA	NA	NA	NA	NA	NA	1.23302	NA	Negative	Positive	NA	NA	NA	NA	NA	NA	NA	NA	NA	NA	NA	NA	NA	NA	NA	NA	NA	NA	NA	NA
GSE73408	GSM1893021	76	Female	Latino	OD	USA	No	Mexico	NA	Whole Blood	NA	NA	NA	Negative	NA	NA	NA	NA	NA	NA	NA	NA	NA	NA	NA	-0.37275	NA	Positive	Negative	NA	NA	NA	NA	NA	NA	NA	NA	NA	NA	NA	NA	NA	NA	NA	NA	NA	NA	NA	NA
GSE107731	GSM2877268	NA	NA	NA	PTB	NA	NA	NA	NA	Whole Blood	Negative	NA	G1	NA	NA	NA	NA	NA	NA	NA	NA	NA	NA	NA	NA	-0.825193	NA	NA	NA	has a genetic relationship with G6	NA	NA	NA	NA	NA	NA	NA	NA	NA	NA	NA	NA	NA	NA	NA	NA	NA	NA	NA
GSE107731	GSM2877269	NA	NA	NA	Control	NA	NA	NA	NA	Whole Blood	Negative	NA	G6	NA	NA	NA	NA	NA	NA	NA	NA	NA	NA	NA	NA	0.116798	NA	NA	NA	has a genetic relationship with G1	NA	NA	NA	NA	NA	NA	NA	NA	NA	NA	NA	NA	NA	NA	NA	NA	NA	NA	NA
GSE107731	GSM2877270	NA	NA	NA	PTB	NA	NA	NA	NA	Whole Blood	Negative	NA	G2	NA	NA	NA	NA	NA	NA	NA	NA	NA	NA	NA	NA	1.26935	NA	NA	NA	has a genetic relationship with G4	NA	NA	NA	NA	NA	NA	NA	NA	NA	NA	NA	NA	NA	NA	NA	NA	NA	NA	NA
GSE107731	GSM2877271	NA	NA	NA	Control	NA	NA	NA	NA	Whole Blood	Negative	NA	G4	NA	NA	NA	NA	NA	NA	NA	NA	NA	NA	NA	NA	0.914675	NA	NA	NA	has a genetic relationship with G2	NA	NA	NA	NA	NA	NA	NA	NA	NA	NA	NA	NA	NA	NA	NA	NA	NA	NA	NA
GSE107731	GSM2877272	NA	NA	NA	PTB	NA	NA	NA	NA	Whole Blood	Negative	NA	G5	NA	NA	NA	NA	NA	NA	NA	NA	NA	NA	NA	NA	-0.117813	NA	NA	NA	has a genetic relationship with G5	NA	NA	NA	NA	NA	NA	NA	NA	NA	NA	NA	NA	NA	NA	NA	NA	NA	NA	NA
GSE107731	GSM2877273	NA	NA	NA	Control	NA	NA	NA	NA	Whole Blood	Negative	NA	G3	NA	NA	NA	NA	NA	NA	NA	NA	NA	NA	NA	NA	-1.35781	NA	NA	NA	has a genetic relationship with G3	NA	NA	NA	NA	NA	NA	NA	NA	NA	NA	NA	NA	NA	NA	NA	NA	NA	NA	NA
GSE19435	GSM484368	28	Male	White	Control	London	Yes	NA	NA	NA	Negative	0_months	test035	NA	NA	NA	NA	NA	NA	NA	NA	NA	NA	NA	NA	-0.912934	NA	Negative	NA	NA	NA	NA	NA	NA	NA	NA	NA	NA	NA	NA	NA	NA	NA	NA	NA	NA	NA	NA	NA
GSE19435	GSM484369	21	Male	White	Control	London	Yes	NA	NA	NA	Negative	0_months	test036	NA	NA	NA	NA	NA	NA	NA	NA	NA	NA	NA	NA	-0.659249	NA	Negative	NA	NA	NA	NA	NA	NA	NA	NA	NA	NA	NA	NA	NA	NA	NA	NA	NA	NA	NA	NA	NA
GSE19435	GSM484370	49	Female	South Asian	Control	London	Yes	NA	NA	NA	Negative	0_months	test037	NA	NA	NA	NA	NA	NA	NA	NA	NA	NA	NA	NA	0.41487	NA	Negative	NA	NA	NA	NA	NA	NA	NA	NA	NA	NA	NA	NA	NA	NA	NA	NA	NA	NA	NA	NA	NA
GSE19435	GSM484371	41	Female	South Asian	Control	London	Yes	NA	NA	NA	Negative	0_months	test038	NA	NA	NA	NA	NA	NA	NA	NA	NA	NA	NA	NA	0.0897524	NA	Negative	NA	NA	NA	NA	NA	NA	NA	NA	NA	NA	NA	NA	NA	NA	NA	NA	NA	NA	NA	NA	NA
GSE19435	GSM484372	33	Female	Black	Control	London	Yes	NA	NA	NA	Negative	0_months	test039	NA	NA	NA	NA	NA	NA	NA	NA	NA	NA	NA	NA	-0.0269933	NA	Negative	NA	NA	NA	NA	NA	NA	NA	NA	NA	NA	NA	NA	NA	NA	NA	NA	NA	NA	NA	NA	NA
GSE19435	GSM484373	28	Female	Black	Control	London	Yes	NA	NA	NA	Negative	0_months	test040	NA	NA	NA	NA	NA	NA	NA	NA	NA	NA	NA	NA	-1.13548	NA	Negative	NA	NA	NA	NA	NA	NA	NA	NA	NA	NA	NA	NA	NA	NA	NA	NA	NA	NA	NA	NA	NA
GSE19435	GSM484374	23	Female	White	Control	London	Yes	NA	NA	NA	Negative	0_months	test041	NA	NA	NA	NA	NA	NA	NA	NA	NA	NA	NA	NA	-1.13365	NA	Negative	NA	NA	NA	NA	NA	NA	NA	NA	NA	NA	NA	NA	NA	NA	NA	NA	NA	NA	NA	NA	NA
GSE19435	GSM484375	29	Male	Other	Control	London	Yes	NA	NA	NA	Negative	0_months	test044	NA	NA	NA	NA	NA	NA	NA	NA	NA	NA	NA	NA	-0.929662	NA	Negative	NA	NA	NA	NA	NA	NA	NA	NA	NA	NA	NA	NA	NA	NA	NA	NA	NA	NA	NA	NA	NA
GSE19435	GSM484376	22	Female	Asian other	Control	London	Yes	NA	NA	NA	Negative	0_months	test046	NA	NA	NA	NA	NA	NA	NA	NA	NA	NA	NA	NA	-0.115177	NA	Negative	NA	NA	NA	NA	NA	NA	NA	NA	NA	NA	NA	NA	NA	NA	NA	NA	NA	NA	NA	NA	NA
GSE19435	GSM484377	43	Male	Black	Control	London	Yes	NA	NA	NA	Negative	0_months	test045	NA	NA	NA	NA	NA	NA	NA	NA	NA	NA	NA	NA	-2.08145	NA	Negative	NA	NA	NA	NA	NA	NA	NA	NA	NA	NA	NA	NA	NA	NA	NA	NA	NA	NA	NA	NA	NA
GSE19435	GSM484378	23	Female	South Asian	Control	London	Yes	NA	NA	NA	Negative	0_months	test047	NA	NA	NA	NA	NA	NA	NA	NA	NA	NA	NA	NA	-0.760649	NA	Negative	NA	NA	NA	NA	NA	NA	NA	NA	NA	NA	NA	NA	NA	NA	NA	NA	NA	NA	NA	NA	NA
GSE19435	GSM484379	32	Male	Asian other	Control	London	Yes	NA	NA	NA	Negative	0_months	test048	NA	NA	NA	NA	NA	NA	NA	NA	NA	NA	NA	NA	-0.877479	NA	Negative	NA	NA	NA	NA	NA	NA	NA	NA	NA	NA	NA	NA	NA	NA	NA	NA	NA	NA	NA	NA	NA
GSE19435	GSM484380	33	Female	Asian Other	PTB	London	Yes	NA	NA	NA	Negative	0_months	tr002	NA	NA	NA	NA	NA	Positive	NA	NA	NA	Fully_Sensitive	NA	NA	0.764945	anti-mycobacterial treatment	Negative	NA	NA	NA	NA	NA	NA	NA	NA	NA	NA	NA	NA	NA	NA	NA	NA	NA	NA	NA	NA	NA
GSE19435	GSM484381	33	Female	Asian Other	PTB	London	Yes	NA	NA	NA	Negative	2_months	tr002	NA	NA	NA	NA	NA	Negative	NA	NA	NA	NA	NA	NA	0.312083	anti-mycobacterial treatment	Negative	NA	NA	NA	NA	NA	NA	NA	NA	NA	NA	NA	NA	NA	NA	NA	NA	NA	NA	NA	NA	NA
GSE19435	GSM484382	33	Female	Asian Other	PTB	London	Yes	NA	NA	NA	Negative	12_months	tr002	NA	NA	NA	NA	NA	No_cough	NA	NA	NA	NA	NA	NA	-0.896113	anti-mycobacterial treatment	Negative	NA	NA	NA	NA	NA	NA	NA	NA	NA	NA	NA	NA	NA	NA	NA	NA	NA	NA	NA	NA	NA
GSE19435	GSM484383	31	Male	South Asian	PTB	London	Yes	NA	NA	NA	Negative	0_months	tr007	NA	NA	NA	NA	NA	Positive	NA	NA	NA	Fully_Sensitive	NA	NA	1.01781	anti-mycobacterial treatment	Negative	NA	NA	NA	NA	NA	NA	NA	NA	NA	NA	NA	NA	NA	NA	NA	NA	NA	NA	NA	NA	NA
GSE19435	GSM484384	31	Male	South Asian	PTB	London	Yes	NA	NA	NA	Negative	2_months	tr007	NA	NA	NA	NA	NA	No_cough	NA	NA	NA	NA	NA	NA	0.18396	anti-mycobacterial treatment	Negative	NA	NA	NA	NA	NA	NA	NA	NA	NA	NA	NA	NA	NA	NA	NA	NA	NA	NA	NA	NA	NA
GSE19435	GSM484385	31	Male	South Asian	PTB	London	Yes	NA	NA	NA	Negative	12_months	tr007	NA	NA	NA	NA	NA	No_cough	NA	NA	NA	NA	NA	NA	-0.365701	anti-mycobacterial treatment	Negative	NA	NA	NA	NA	NA	NA	NA	NA	NA	NA	NA	NA	NA	NA	NA	NA	NA	NA	NA	NA	NA
GSE19435	GSM484386	29	Male	White	PTB	London	Yes	NA	NA	NA	Negative	0_months	tr012	NA	NA	NA	NA	NA	Positive	NA	NA	NA	Fully_Sensitive	NA	NA	-0.138811	anti-mycobacterial treatment	Negative	NA	NA	NA	NA	NA	NA	NA	NA	NA	NA	NA	NA	NA	NA	NA	NA	NA	NA	NA	NA	NA
GSE19435	GSM484387	51	Male	White	PTB	London	Yes	NA	NA	NA	Negative	0_months	tr015	NA	NA	NA	NA	NA	Positive	NA	NA	NA	Fully_Sensitive	NA	NA	1.94146	anti-mycobacterial treatment	Negative	NA	NA	NA	NA	NA	NA	NA	NA	NA	NA	NA	NA	NA	NA	NA	NA	NA	NA	NA	NA	NA
GSE19435	GSM484388	48	Female	Black	PTB	London	Yes	NA	NA	NA	Negative	0_months	tr020	NA	NA	NA	NA	NA	Negative	NA	NA	NA	Fully_Sensitive	NA	NA	0.546192	anti-mycobacterial treatment	Negative	NA	NA	NA	NA	NA	NA	NA	NA	NA	NA	NA	NA	NA	NA	NA	NA	NA	NA	NA	NA	NA
GSE19435	GSM484389	29	Male	White	PTB	London	Yes	NA	NA	NA	Negative	2_months	tr012	NA	NA	NA	NA	NA	No_cough	NA	NA	NA	NA	NA	NA	-1.06873	anti-mycobacterial treatment	Negative	NA	NA	NA	NA	NA	NA	NA	NA	NA	NA	NA	NA	NA	NA	NA	NA	NA	NA	NA	NA	NA
GSE19435	GSM484390	51	Male	White	PTB	London	Yes	NA	NA	NA	Negative	2_months	tr015	NA	NA	NA	NA	NA	Positive	NA	NA	NA	Fully_Sensitive	NA	NA	0.452297	anti-mycobacterial treatment	Negative	NA	NA	NA	NA	NA	NA	NA	NA	NA	NA	NA	NA	NA	NA	NA	NA	NA	NA	NA	NA	NA
GSE19435	GSM484391	48	Female	Black	PTB	London	Yes	NA	NA	NA	Negative	2_months	tr020	NA	NA	NA	NA	NA	No_cough	NA	NA	NA	NA	NA	NA	0.660756	anti-mycobacterial treatment	Negative	NA	NA	NA	NA	NA	NA	NA	NA	NA	NA	NA	NA	NA	NA	NA	NA	NA	NA	NA	NA	NA
GSE19435	GSM484392	29	Male	White	PTB	London	Yes	NA	NA	NA	Negative	12_months	tr012	NA	NA	NA	NA	NA	No_cough	NA	NA	NA	NA	NA	NA	-0.43681	anti-mycobacterial treatment	Negative	NA	NA	NA	NA	NA	NA	NA	NA	NA	NA	NA	NA	NA	NA	NA	NA	NA	NA	NA	NA	NA
GSE19435	GSM484393	51	Male	White	PTB	London	Yes	NA	NA	NA	Negative	12_months	tr015	NA	NA	NA	NA	NA	Negative	NA	NA	NA	NA	NA	NA	-0.401825	anti-mycobacterial treatment	Negative	NA	NA	NA	NA	NA	NA	NA	NA	NA	NA	NA	NA	NA	NA	NA	NA	NA	NA	NA	NA	NA
GSE19435	GSM484394	48	Female	Black	PTB	London	Yes	NA	NA	NA	Negative	12_months	tr020	NA	NA	NA	NA	NA	No_cough	NA	NA	NA	NA	NA	NA	-0.595812	anti-mycobacterial treatment	Negative	NA	NA	NA	NA	NA	NA	NA	NA	NA	NA	NA	NA	NA	NA	NA	NA	NA	NA	NA	NA	NA
GSE19435	GSM484395	21	Female	Black	PTB	London	No	NA	NA	NA	Negative	0_months	tr026	NA	NA	NA	NA	NA	Positive	NA	NA	NA	Fully_Sensitive	NA	NA	1.78263	anti-mycobacterial treatment	Negative	NA	NA	NA	NA	NA	NA	NA	NA	NA	NA	NA	NA	NA	NA	NA	NA	NA	NA	NA	NA	NA
GSE19435	GSM484396	21	Female	Black	PTB	London	No	NA	NA	NA	Negative	2_months	tr026	NA	NA	NA	NA	NA	Positive	NA	NA	NA	Fully_Sensitive	NA	NA	0.927915	anti-mycobacterial treatment	Negative	NA	NA	NA	NA	NA	NA	NA	NA	NA	NA	NA	NA	NA	NA	NA	NA	NA	NA	NA	NA	NA
GSE19435	GSM484397	21	Female	Black	PTB	London	No	NA	NA	NA	Negative	12_months	tr026	NA	NA	NA	NA	NA	No_cough	NA	NA	NA	NA	NA	NA	-0.506163	anti-mycobacterial treatment	Negative	NA	NA	NA	NA	NA	NA	NA	NA	NA	NA	NA	NA	NA	NA	NA	NA	NA	NA	NA	NA	NA
GSE19435	GSM484398	29	Male	South Asian	PTB	London	No	NA	NA	NA	Negative	0_months	tr037	NA	NA	NA	NA	NA	Positive	NA	NA	NA	NA	NA	NA	2.18535	anti-mycobacterial treatment	Negative	NA	NA	NA	NA	NA	NA	NA	NA	NA	NA	NA	NA	NA	NA	NA	NA	NA	NA	NA	NA	NA
GSE19435	GSM484399	29	Male	South Asian	PTB	London	No	NA	NA	NA	Negative	2_months	tr037	NA	NA	NA	NA	NA	Negative	NA	NA	NA	NA	NA	NA	1.75518	anti-mycobacterial treatment	Negative	NA	NA	NA	NA	NA	NA	NA	NA	NA	NA	NA	NA	NA	NA	NA	NA	NA	NA	NA	NA	NA
GSE19435	GSM484400	29	Male	South Asian	PTB	London	No	NA	NA	NA	Negative	12_months	tr037	NA	NA	NA	NA	NA	No_cough	NA	NA	NA	NA	NA	NA	0.00747724	anti-mycobacterial treatment	Negative	NA	NA	NA	NA	NA	NA	NA	NA	NA	NA	NA	NA	NA	NA	NA	NA	NA	NA	NA	NA	NA
GSE19439	GSM484448	34	Male	Black	LTBI	London	Yes	non_UK_Born	27	Whole Blood	Negative	NA	NA	NA	Contact_Screen	pulm	Sm+	Minimal	NA	NA	NA	NA	NA	Positive	NA	-1.54185	NA	Negative	NA	NA	NA	NA	NA	NA	NA	NA	NA	NA	NA	NA	NA	NA	NA	NA	NA	NA	NA	NA	NA
GSE19439	GSM484449	31	Male	South Asian	PTB	London	Yes	UK_Born	11	Whole Blood	Negative	NA	NA	NA	NA	NA	NA	Moderate	NA	NA	scanty	M.tuberculosis	Fully_sensitive	NA	NA	1.30157	NA	Negative	NA	NA	NA	NA	NA	NA	NA	NA	NA	NA	NA	NA	NA	NA	NA	NA	NA	NA	NA	NA	NA
GSE19439	GSM484450	28	Female	White	Control	London	Yes	UK_Born	5	Whole Blood	Negative	NA	NA	NA	NA	NA	NA	NA	NA	NA	NA	NA	NA	NA	NA	-0.675234	NA	Negative	NA	NA	NA	NA	NA	NA	NA	NA	NA	NA	NA	NA	NA	NA	NA	NA	NA	NA	NA	NA	NA
GSE19439	GSM484451	48	Female	Black	PTB	London	Yes	non_UK_Born	25	Whole Blood	Negative	NA	NA	NA	NA	NA	NA	Minimal	nil	M.tuberculosis	nil	no_growth_6_weeks	Fully_sensitive	NA	NA	1.86269	NA	Negative	NA	NA	NA	NA	NA	NA	NA	NA	NA	NA	NA	NA	NA	NA	NA	NA	NA	NA	NA	NA	NA
GSE19439	GSM484452	30	Male	Black	LTBI	London	Yes	non_UK_Born	20	Whole Blood	Negative	NA	NA	NA	New_Entrant	NA	NA	No disease	NA	NA	NA	NA	NA	Positive	NA	-0.466839	NA	Negative	NA	NA	NA	NA	NA	NA	NA	NA	NA	NA	NA	NA	NA	NA	NA	NA	NA	NA	NA	NA	NA
GSE19439	GSM484453	34	Female	White	Control	London	No	non_UK_Born	0	Whole Blood	Negative	NA	NA	NA	NA	NA	NA	NA	NA	NA	NA	NA	NA	NA	NA	-0.819158	NA	Negative	NA	NA	NA	NA	NA	NA	NA	NA	NA	NA	NA	NA	NA	NA	NA	NA	NA	NA	NA	NA	NA
GSE19439	GSM484454	27	Male	White	Control	London	Yes	non_UK_Born	13	Whole Blood	Negative	NA	NA	NA	NA	NA	NA	NA	NA	NA	NA	NA	NA	NA	NA	-0.374321	NA	Negative	NA	NA	NA	NA	NA	NA	NA	NA	NA	NA	NA	NA	NA	NA	NA	NA	NA	NA	NA	NA	NA
GSE19439	GSM484455	40	Female	Asian Other	LTBI	London	Yes	non_UK_Born	23	Whole Blood	Negative	NA	NA	NA	GP_Referral	pulm	unknown	No disease	NA	NA	NA	NA	NA	Positive	NA	-0.932876	NA	Negative	NA	NA	NA	NA	NA	NA	NA	NA	NA	NA	NA	NA	NA	NA	NA	NA	NA	NA	NA	NA	NA
GSE19439	GSM484456	51	Male	White	PTB	London	Yes	non_UK_Born	15	Whole Blood	Negative	NA	NA	NA	NA	NA	NA	Advanced	+++	M.tuberculosis	NA	NA	Fully_sensitive	NA	NA	1.93812	NA	Negative	NA	NA	NA	NA	NA	NA	NA	NA	NA	NA	NA	NA	NA	NA	NA	NA	NA	NA	NA	NA	NA
GSE19439	GSM484457	31	Female	White	Control	London	No	non_UK_Born	0	Whole Blood	Negative	NA	NA	NA	NA	NA	NA	NA	NA	NA	NA	NA	NA	NA	NA	-0.00754655	NA	Negative	NA	NA	NA	NA	NA	NA	NA	NA	NA	NA	NA	NA	NA	NA	NA	NA	NA	NA	NA	NA	NA
GSE19439	GSM484458	43	Male	Black	LTBI	London	Yes	non_UK_Born	37	Whole Blood	Negative	NA	NA	NA	Contact_Screen	extrapulm	NA	Minimal	NA	NA	NA	NA	NA	Positive	NA	-2.17955	NA	Negative	NA	NA	NA	NA	NA	NA	NA	NA	NA	NA	NA	NA	NA	NA	NA	NA	NA	NA	NA	NA	NA
GSE19439	GSM484459	33	Female	Asian Other	PTB	London	Yes	non_UK_Born	22	Whole Blood	Negative	NA	NA	NA	NA	NA	NA	Moderate	nil	M.tuberculosis	+	M.tuberculosis	Fully_sensitive	NA	NA	1.01012	NA	Negative	NA	NA	NA	NA	NA	NA	NA	NA	NA	NA	NA	NA	NA	NA	NA	NA	NA	NA	NA	NA	NA
GSE19439	GSM484460	32	Male	White	LTBI	London	Yes	non_UK_Born	17	Whole Blood	Negative	NA	NA	NA	Contact_Screen	pulm	Sm+	No disease	NA	NA	NA	NA	NA	Positive	NA	-0.116866	NA	Negative	NA	NA	NA	NA	NA	NA	NA	NA	NA	NA	NA	NA	NA	NA	NA	NA	NA	NA	NA	NA	NA
GSE19439	GSM484461	23	Female	Black	LTBI	London	No	non_UK_Born	17	Whole Blood	Negative	NA	NA	NA	Contact_Screen	unknown	NA	No disease	NA	NA	NA	NA	NA	Positive	NA	-1.4441	NA	Negative	NA	NA	NA	NA	NA	NA	NA	NA	NA	NA	NA	NA	NA	NA	NA	NA	NA	NA	NA	NA	NA
GSE19439	GSM484462	28	Male	White	Control	London	Yes	UK_Born	7	Whole Blood	Negative	NA	NA	NA	NA	NA	NA	NA	NA	NA	NA	NA	NA	NA	NA	-0.312345	NA	Negative	NA	NA	NA	NA	NA	NA	NA	NA	NA	NA	NA	NA	NA	NA	NA	NA	NA	NA	NA	NA	NA
GSE19439	GSM484463	22	Male	Black	PTB	London	Yes	non_UK_Born	NA	Whole Blood	Negative	NA	NA	NA	NA	NA	NA	Moderate	scanty	M.tuberculosis	NA	NA	Resistant Streptomycin	NA	NA	-0.218356	NA	Negative	NA	NA	NA	NA	NA	NA	NA	NA	NA	NA	NA	NA	NA	NA	NA	NA	NA	NA	NA	NA	NA
GSE19439	GSM484464	21	Female	Asian Other	LTBI	London	Yes	non_UK_Born	15	Whole Blood	Negative	NA	NA	NA	Contact_Screen	pulm	Sm+	No disease	NA	NA	NA	NA	NA	Positive	NA	0.569413	NA	Negative	NA	NA	NA	NA	NA	NA	NA	NA	NA	NA	NA	NA	NA	NA	NA	NA	NA	NA	NA	NA	NA
GSE19439	GSM484465	31	Female	White	Control	London	No	non_UK_Born	0	Whole Blood	Negative	NA	NA	NA	NA	NA	NA	NA	NA	NA	NA	NA	NA	NA	NA	0.700247	NA	Negative	NA	NA	NA	NA	NA	NA	NA	NA	NA	NA	NA	NA	NA	NA	NA	NA	NA	NA	NA	NA	NA
GSE19439	GSM484466	29	Male	White	PTB	London	Yes	UK_Born	20	Whole Blood	Negative	NA	NA	NA	NA	NA	NA	Moderate	nil	M.tuberculosis	scanty	M.tuberculosis	Fully_sensitive	NA	NA	-0.394339	NA	Negative	NA	NA	NA	NA	NA	NA	NA	NA	NA	NA	NA	NA	NA	NA	NA	NA	NA	NA	NA	NA	NA
GSE19439	GSM484467	30	Male	Black	LTBI	London	Yes	non_UK_Born	27	Whole Blood	Negative	NA	NA	NA	Contact_Screen	pulm	unknown	No disease	NA	NA	nil	no_growth_6_weeks	NA	Positive	NA	-1.14003	NA	Negative	NA	NA	NA	NA	NA	NA	NA	NA	NA	NA	NA	NA	NA	NA	NA	NA	NA	NA	NA	NA	NA
GSE19439	GSM484468	23	Female	Asian Other	PTB	London	Yes	non_UK_Born	10	Whole Blood	Negative	NA	NA	NA	NA	NA	NA	Advanced	nil	no_growth_6_weeks	nil	M.tuberculosis	Fully_sensitive	NA	NA	-0.037658	NA	Negative	NA	NA	NA	NA	NA	NA	NA	NA	NA	NA	NA	NA	NA	NA	NA	NA	NA	NA	NA	NA	NA
GSE19439	GSM484469	19	Male	South Asian	LTBI	London	Yes	non_UK_Born	20	Whole Blood	Negative	NA	NA	NA	Contact_Screen	extrapulm	NA	No disease	NA	NA	NA	NA	NA	Positive	NA	-0.409851	NA	Negative	NA	NA	NA	NA	NA	NA	NA	NA	NA	NA	NA	NA	NA	NA	NA	NA	NA	NA	NA	NA	NA
GSE19439	GSM484470	27	Male	South Asian	PTB	London	Yes	non_UK_Born	NA	Whole Blood	Negative	NA	NA	NA	New_Entrant	NA	NA	Minimal	NA	NA	nil	M.tuberculosis	Fully_sensitive	NA	NA	-1.28614	NA	Negative	NA	NA	NA	NA	NA	NA	NA	NA	NA	NA	NA	NA	NA	NA	NA	NA	NA	NA	NA	NA	NA
GSE19439	GSM484471	25	Female	Asian Other	LTBI	London	Yes	non_UK_Born	19	Whole Blood	Negative	NA	NA	NA	Contact_Screen	pulm	Sm+	No disease	NA	NA	NA	NA	NA	Positive	NA	0.750266	NA	Negative	NA	NA	NA	NA	NA	NA	NA	NA	NA	NA	NA	NA	NA	NA	NA	NA	NA	NA	NA	NA	NA
GSE19439	GSM484472	21	Female	Black	PTB	London	No	non_UK_Born	NA	Whole Blood	Negative	NA	NA	NA	New_Entrant	NA	NA	Advanced	++	M.tuberculosis	NA	NA	Fully_sensitive	NA	NA	2.0281	NA	Negative	NA	NA	NA	NA	NA	NA	NA	NA	NA	NA	NA	NA	NA	NA	NA	NA	NA	NA	NA	NA	NA
GSE19439	GSM484473	24	Female	White	LTBI	London	No	non_UK_Born	12	Whole Blood	Negative	NA	NA	NA	Contact_Screen	pulm	Sm+	Minimal	NA	NA	NA	NA	NA	Positive	NA	0.104225	NA	Negative	NA	NA	NA	NA	NA	NA	NA	NA	NA	NA	NA	NA	NA	NA	NA	NA	NA	NA	NA	NA	NA
GSE19439	GSM484474	29	Male	South Asian	PTB	London	No	non_UK_Born	NA	Whole Blood	Negative	NA	NA	NA	NA	NA	NA	Moderate	+	M.tuberculosis	NA	NA	Resistant Isoniazid	NA	NA	2.12469	NA	Negative	NA	NA	NA	NA	NA	NA	NA	NA	NA	NA	NA	NA	NA	NA	NA	NA	NA	NA	NA	NA	NA
GSE19439	GSM484475	72	Male	Other	PTB	London	Unknown	non_UK_Born	22	Whole Blood	Negative	NA	NA	NA	NA	NA	NA	Moderate	NA	NA	nil	M.tuberculosis	Fully_sensitive	NA	NA	0.0559348	NA	Negative	NA	NA	NA	NA	NA	NA	NA	NA	NA	NA	NA	NA	NA	NA	NA	NA	NA	NA	NA	NA	NA
GSE19439	GSM484476	37	Female	South Asian	LTBI	London	No	UK_Born	28	Whole Blood	Negative	NA	NA	NA	Contact_Screen	pulm	unknown	Minimal	NA	NA	NA	NA	NA	Positive	NA	0.507023	NA	Negative	NA	NA	NA	NA	NA	NA	NA	NA	NA	NA	NA	NA	NA	NA	NA	NA	NA	NA	NA	NA	NA
GSE19439	GSM484477	35	Female	White	Control	London	Yes	UK_Born	0	Whole Blood	Negative	NA	NA	NA	NA	NA	NA	NA	NA	NA	NA	NA	NA	NA	NA	-0.44323	NA	Negative	NA	NA	NA	NA	NA	NA	NA	NA	NA	NA	NA	NA	NA	NA	NA	NA	NA	NA	NA	NA	NA
GSE19439	GSM484478	25	Female	White	PTB	London	Yes	UK_Born	4	Whole Blood	Negative	NA	NA	NA	NA	NA	NA	Moderate	scanty	M.tuberculosis	nil	M.tuberculosis	Fully_sensitive	NA	NA	0.620908	NA	Negative	NA	NA	NA	NA	NA	NA	NA	NA	NA	NA	NA	NA	NA	NA	NA	NA	NA	NA	NA	NA	NA
GSE19439	GSM484479	31	Female	White	Control	London	No	non_UK_Born	0	Whole Blood	Negative	NA	NA	NA	NA	NA	NA	NA	NA	NA	NA	NA	NA	NA	NA	-0.727632	NA	Negative	NA	NA	NA	NA	NA	NA	NA	NA	NA	NA	NA	NA	NA	NA	NA	NA	NA	NA	NA	NA	NA
GSE19439	GSM484480	35	Male	White	Control	London	No	non_UK_Born	0	Whole Blood	Negative	NA	NA	NA	NA	NA	NA	NA	NA	NA	NA	NA	NA	NA	NA	0.20819	NA	Negative	NA	NA	NA	NA	NA	NA	NA	NA	NA	NA	NA	NA	NA	NA	NA	NA	NA	NA	NA	NA	NA
GSE19439	GSM484481	20	Male	White	Control	London	Yes	UK_Born	0	Whole Blood	Negative	NA	NA	NA	NA	NA	NA	NA	NA	NA	NA	NA	NA	NA	NA	-0.860674	NA	Negative	NA	NA	NA	NA	NA	NA	NA	NA	NA	NA	NA	NA	NA	NA	NA	NA	NA	NA	NA	NA	NA
GSE19439	GSM484482	39	Female	Black	LTBI	London	Yes	non_UK_Born	28	Whole Blood	Negative	NA	NA	NA	Contact_Screen	pulm	Sm-	No disease	NA	NA	NA	NA	NA	Positive	NA	0.496271	NA	Negative	NA	NA	NA	NA	NA	NA	NA	NA	NA	NA	NA	NA	NA	NA	NA	NA	NA	NA	NA	NA	NA
GSE19439	GSM484483	20	Female	White	Control	London	Yes	UK_Born	0	Whole Blood	Negative	NA	NA	NA	NA	NA	NA	NA	NA	NA	NA	NA	NA	NA	NA	0.70531	NA	Negative	NA	NA	NA	NA	NA	NA	NA	NA	NA	NA	NA	NA	NA	NA	NA	NA	NA	NA	NA	NA	NA
GSE19439	GSM484484	52	Female	South Asian	LTBI	London	Yes	non_UK_Born	30	Whole Blood	Negative	NA	NA	NA	New_Entrant	NA	NA	No disease	NA	NA	NA	NA	NA	Positive	NA	-0.853227	NA	Negative	NA	NA	NA	NA	NA	NA	NA	NA	NA	NA	NA	NA	NA	NA	NA	NA	NA	NA	NA	NA	NA
GSE19439	GSM484485	23	Female	Black	PTB	London	No	non_UK_Born	20	Whole Blood	Negative	NA	NA	NA	NA	NA	NA	Minimal	nil	M.tuberculosis	scanty	M.tuberculosis	Fully_sensitive	NA	NA	0.129994	NA	Negative	NA	NA	NA	NA	NA	NA	NA	NA	NA	NA	NA	NA	NA	NA	NA	NA	NA	NA	NA	NA	NA
GSE19439	GSM484486	52	Male	Asian Other	LTBI	London	Yes	non_UK_Born	19	Whole Blood	Negative	NA	NA	NA	Contact_Screen	pulm	Sm+	No disease	NA	NA	NA	NA	NA	Positive	NA	0.911364	NA	Negative	NA	NA	NA	NA	NA	NA	NA	NA	NA	NA	NA	NA	NA	NA	NA	NA	NA	NA	NA	NA	NA
GSE19439	GSM484487	35	Female	White	Control	London	No	non_UK_Born	0	Whole Blood	Negative	NA	NA	NA	NA	NA	NA	NA	NA	NA	NA	NA	NA	NA	NA	0.612626	NA	Negative	NA	NA	NA	NA	NA	NA	NA	NA	NA	NA	NA	NA	NA	NA	NA	NA	NA	NA	NA	NA	NA
GSE19439	GSM484488	32	Male	Black	LTBI	London	Yes	non_UK_Born	18	Whole Blood	Negative	NA	NA	NA	Contact_Screen	pulm	Sm+	No disease	NA	NA	NA	NA	NA	Positive	NA	-1.02482	NA	Negative	NA	NA	NA	NA	NA	NA	NA	NA	NA	NA	NA	NA	NA	NA	NA	NA	NA	NA	NA	NA	NA
GSE19439	GSM484489	30	Female	Asian Other	LTBI	London	Unknown	non_UK_Born	19	Whole Blood	Negative	NA	NA	NA	Contact_Screen	extrapulm	NA	No disease	NA	NA	NA	NA	NA	Positive	NA	-0.370405	NA	Negative	NA	NA	NA	NA	NA	NA	NA	NA	NA	NA	NA	NA	NA	NA	NA	NA	NA	NA	NA	NA	NA
GSE19442	GSM484500	22	Male	Black	PTB	South Africa	No	non_UK_born	NA	NA	Negative	NA	NA	NA	NA	NA	NA	NA	3+	M.tuberculosis	NA	NA	NA	NA	NA	2.6623	NA	Negative	NA	NA	NA	NA	NA	NA	NA	NA	NA	NA	NA	NA	NA	NA	NA	NA	NA	NA	NA	NA	NA
GSE19442	GSM484501	21	Female	Black	PTB	South Africa	Yes	non_UK_born	NA	NA	Negative	NA	NA	NA	NA	NA	NA	NA	1+	M.tuberculosis	NA	NA	NA	NA	NA	0.0967866	NA	Negative	NA	NA	NA	NA	NA	NA	NA	NA	NA	NA	NA	NA	NA	NA	NA	NA	NA	NA	NA	NA	NA
GSE19442	GSM484502	27	Male	Black	PTB	South Africa	No	non_UK_born	NA	NA	Negative	NA	NA	NA	NA	NA	NA	NA	3+	M.tuberculosis	NA	NA	NA	NA	NA	0.613305	NA	Negative	NA	NA	NA	NA	NA	NA	NA	NA	NA	NA	NA	NA	NA	NA	NA	NA	NA	NA	NA	NA	NA
GSE19442	GSM484503	25	Male	Black	PTB	South Africa	Yes	non_UK_born	NA	NA	Negative	NA	NA	NA	NA	NA	NA	NA	Negative	M.tuberculosis	NA	NA	NA	NA	NA	1.14878	NA	Negative	NA	NA	NA	NA	NA	NA	NA	NA	NA	NA	NA	NA	NA	NA	NA	NA	NA	NA	NA	NA	NA
GSE19442	GSM484504	33	Female	Black	LTBI	South Africa	No	non_UK_born	15	NA	Negative	NA	NA	NA	NA	NA	NA	NA	NA	NA	NA	NA	NA	NA	NA	-0.304627	NA	Negative	NA	NA	NA	NA	NA	NA	NA	NA	NA	NA	NA	NA	NA	NA	NA	NA	NA	NA	NA	NA	NA
GSE19442	GSM484505	19	Female	Black	LTBI	South Africa	No	non_UK_born	14	NA	Negative	NA	NA	NA	NA	NA	NA	NA	NA	NA	NA	NA	NA	NA	NA	-0.376143	NA	Negative	NA	NA	NA	NA	NA	NA	NA	NA	NA	NA	NA	NA	NA	NA	NA	NA	NA	NA	NA	NA	NA
GSE19442	GSM484506	21	Male	Black	LTBI	South Africa	No	non_UK_born	15	NA	Negative	NA	NA	NA	NA	NA	NA	NA	NA	NA	NA	NA	NA	NA	NA	0.0521033	NA	Negative	NA	NA	NA	NA	NA	NA	NA	NA	NA	NA	NA	NA	NA	NA	NA	NA	NA	NA	NA	NA	NA
GSE19442	GSM484507	20	Female	Black	LTBI	South Africa	Unknown	non_UK_born	22	NA	Negative	NA	NA	NA	NA	NA	NA	NA	NA	NA	NA	NA	NA	NA	NA	0.375466	NA	Negative	NA	NA	NA	NA	NA	NA	NA	NA	NA	NA	NA	NA	NA	NA	NA	NA	NA	NA	NA	NA	NA
GSE19442	GSM484508	24	Female	Black	LTBI	South Africa	Unknown	non_UK_born	5	NA	Negative	NA	NA	NA	NA	NA	NA	NA	NA	NA	NA	NA	NA	NA	NA	-0.383326	NA	Negative	NA	NA	NA	NA	NA	NA	NA	NA	NA	NA	NA	NA	NA	NA	NA	NA	NA	NA	NA	NA	NA
GSE19442	GSM484509	22	Female	Black	LTBI	South Africa	Unknown	non_UK_born	20	NA	Negative	NA	NA	NA	NA	NA	NA	NA	NA	NA	NA	NA	NA	NA	NA	-0.0110603	NA	Negative	NA	NA	NA	NA	NA	NA	NA	NA	NA	NA	NA	NA	NA	NA	NA	NA	NA	NA	NA	NA	NA
GSE19442	GSM484510	24	Male	Black	LTBI	South Africa	No	non_UK_born	7	NA	Negative	NA	NA	NA	NA	NA	NA	NA	NA	NA	NA	NA	NA	NA	NA	-0.703185	NA	Negative	NA	NA	NA	NA	NA	NA	NA	NA	NA	NA	NA	NA	NA	NA	NA	NA	NA	NA	NA	NA	NA
GSE19442	GSM484511	18	Female	Black	LTBI	South Africa	No	non_UK_born	0	NA	Negative	NA	NA	NA	NA	NA	NA	NA	NA	NA	NA	NA	NA	NA	NA	-1.26873	NA	Negative	NA	NA	NA	NA	NA	NA	NA	NA	NA	NA	NA	NA	NA	NA	NA	NA	NA	NA	NA	NA	NA
GSE19442	GSM484512	18	Female	Black	LTBI	South Africa	No	non_UK_born	15	NA	Negative	NA	NA	NA	NA	NA	NA	NA	NA	NA	NA	NA	NA	NA	NA	-0.213787	NA	Negative	NA	NA	NA	NA	NA	NA	NA	NA	NA	NA	NA	NA	NA	NA	NA	NA	NA	NA	NA	NA	NA
GSE19442	GSM484513	24	Female	Black	LTBI	South Africa	Unknown	non_UK_born	0	NA	Negative	NA	NA	NA	NA	NA	NA	NA	NA	NA	NA	NA	NA	NA	NA	1.26711	NA	Negative	NA	NA	NA	NA	NA	NA	NA	NA	NA	NA	NA	NA	NA	NA	NA	NA	NA	NA	NA	NA	NA
GSE19442	GSM484514	22	Male	Black	LTBI	South Africa	Unknown	non_UK_born	0	NA	Negative	NA	NA	NA	NA	NA	NA	NA	NA	NA	NA	NA	NA	NA	NA	-0.744872	NA	Negative	NA	NA	NA	NA	NA	NA	NA	NA	NA	NA	NA	NA	NA	NA	NA	NA	NA	NA	NA	NA	NA
GSE19442	GSM484515	25	Male	Black	PTB	South Africa	Yes	non_UK_born	NA	NA	Negative	NA	NA	NA	NA	NA	NA	NA	3+	M.tuberculosis	NA	NA	NA	NA	NA	2.2043	NA	Negative	NA	NA	NA	NA	NA	NA	NA	NA	NA	NA	NA	NA	NA	NA	NA	NA	NA	NA	NA	NA	NA
GSE19442	GSM484516	47	Male	Black	PTB	South Africa	No	non_UK_born	NA	NA	Negative	NA	NA	NA	NA	NA	NA	NA	2+	M.tuberculosis	NA	NA	NA	NA	NA	0.209791	NA	Negative	NA	NA	NA	NA	NA	NA	NA	NA	NA	NA	NA	NA	NA	NA	NA	NA	NA	NA	NA	NA	NA
GSE19442	GSM484517	32	Female	Black	PTB	South Africa	Yes	non_UK_born	NA	NA	Negative	NA	NA	NA	NA	NA	NA	NA	1+	M.tuberculosis	NA	NA	NA	NA	NA	0.356128	NA	Negative	NA	NA	NA	NA	NA	NA	NA	NA	NA	NA	NA	NA	NA	NA	NA	NA	NA	NA	NA	NA	NA
GSE19442	GSM484518	40	Male	Black	PTB	South Africa	No	non_UK_born	NA	NA	Negative	NA	NA	NA	NA	NA	NA	NA	1+	M.tuberculosis	NA	NA	NA	NA	NA	-1.77756	NA	Negative	NA	NA	NA	NA	NA	NA	NA	NA	NA	NA	NA	NA	NA	NA	NA	NA	NA	NA	NA	NA	NA
GSE19442	GSM484519	46	Female	Black	PTB	South Africa	Yes	non_UK_born	NA	NA	Negative	NA	NA	NA	NA	NA	NA	NA	3+	M.tuberculosis	NA	NA	NA	NA	NA	0.484035	NA	Negative	NA	NA	NA	NA	NA	NA	NA	NA	NA	NA	NA	NA	NA	NA	NA	NA	NA	NA	NA	NA	NA
GSE19442	GSM484520	18	Male	Black	LTBI	South Africa	No	non_UK_born	0	NA	Negative	NA	NA	NA	NA	NA	NA	NA	NA	NA	NA	NA	NA	NA	NA	-0.757631	NA	Negative	NA	NA	NA	NA	NA	NA	NA	NA	NA	NA	NA	NA	NA	NA	NA	NA	NA	NA	NA	NA	NA
GSE19442	GSM484521	18	Male	Black	LTBI	South Africa	No	non_UK_born	4	NA	Negative	NA	NA	NA	NA	NA	NA	NA	NA	NA	NA	NA	NA	NA	NA	-1.68008	NA	Negative	NA	NA	NA	NA	NA	NA	NA	NA	NA	NA	NA	NA	NA	NA	NA	NA	NA	NA	NA	NA	NA
GSE19442	GSM484522	18	Female	Black	LTBI	South Africa	No	non_UK_born	0	NA	Negative	NA	NA	NA	NA	NA	NA	NA	NA	NA	NA	NA	NA	NA	NA	-1.44757	NA	Negative	NA	NA	NA	NA	NA	NA	NA	NA	NA	NA	NA	NA	NA	NA	NA	NA	NA	NA	NA	NA	NA
GSE19442	GSM484523	20	Female	Black	LTBI	South Africa	No	non_UK_born	11	NA	Negative	NA	NA	NA	NA	NA	NA	NA	NA	NA	NA	NA	NA	NA	NA	-0.595511	NA	Negative	NA	NA	NA	NA	NA	NA	NA	NA	NA	NA	NA	NA	NA	NA	NA	NA	NA	NA	NA	NA	NA
GSE19442	GSM484524	42	Male	Black	PTB	South Africa	No	non_UK_born	NA	NA	Negative	NA	NA	NA	NA	NA	NA	NA	1+	M.tuberculosis	NA	NA	NA	NA	NA	0.255432	NA	Negative	NA	NA	NA	NA	NA	NA	NA	NA	NA	NA	NA	NA	NA	NA	NA	NA	NA	NA	NA	NA	NA
GSE19442	GSM484525	48	Female	Black	PTB	South Africa	No	non_UK_born	NA	NA	Negative	NA	NA	NA	NA	NA	NA	NA	2+	M.tuberculosis	NA	NA	NA	NA	NA	0.0342356	NA	Negative	NA	NA	NA	NA	NA	NA	NA	NA	NA	NA	NA	NA	NA	NA	NA	NA	NA	NA	NA	NA	NA
GSE19442	GSM484526	27	Male	Black	PTB	South Africa	No	non_UK_born	NA	NA	Negative	NA	NA	NA	NA	NA	NA	NA	2+	M.tuberculosis	NA	NA	NA	NA	NA	0.0708502	NA	Negative	NA	NA	NA	NA	NA	NA	NA	NA	NA	NA	NA	NA	NA	NA	NA	NA	NA	NA	NA	NA	NA
GSE19442	GSM484527	45	Male	Black	PTB	South Africa	No	non_UK_born	NA	NA	Negative	NA	NA	NA	NA	NA	NA	NA	Scanty Positive	M.tuberculosis	NA	NA	NA	NA	NA	0.012081	NA	Negative	NA	NA	NA	NA	NA	NA	NA	NA	NA	NA	NA	NA	NA	NA	NA	NA	NA	NA	NA	NA	NA
GSE19442	GSM484528	21	Male	Black	LTBI	South Africa	No	non_UK_born	14	NA	Negative	NA	NA	NA	NA	NA	NA	NA	NA	NA	NA	NA	NA	NA	NA	0.116323	NA	Negative	NA	NA	NA	NA	NA	NA	NA	NA	NA	NA	NA	NA	NA	NA	NA	NA	NA	NA	NA	NA	NA
GSE19442	GSM484529	24	Female	Black	LTBI	South Africa	No	non_UK_born	20	NA	Negative	NA	NA	NA	NA	NA	NA	NA	NA	NA	NA	NA	NA	NA	NA	0.498536	NA	Negative	NA	NA	NA	NA	NA	NA	NA	NA	NA	NA	NA	NA	NA	NA	NA	NA	NA	NA	NA	NA	NA
GSE19442	GSM484530	21	Male	Black	LTBI	South Africa	No	non_UK_born	10	NA	Negative	NA	NA	NA	NA	NA	NA	NA	NA	NA	NA	NA	NA	NA	NA	-1.98203	NA	Negative	NA	NA	NA	NA	NA	NA	NA	NA	NA	NA	NA	NA	NA	NA	NA	NA	NA	NA	NA	NA	NA
GSE19442	GSM484531	27	Female	Black	LTBI	South Africa	No	non_UK_born	14	NA	Negative	NA	NA	NA	NA	NA	NA	NA	NA	NA	NA	NA	NA	NA	NA	0.96824	NA	Negative	NA	NA	NA	NA	NA	NA	NA	NA	NA	NA	NA	NA	NA	NA	NA	NA	NA	NA	NA	NA	NA
GSE19442	GSM484532	24	Male	Black	LTBI	South Africa	No	non_UK_born	0	NA	Negative	NA	NA	NA	NA	NA	NA	NA	NA	NA	NA	NA	NA	NA	NA	-1.28853	NA	Negative	NA	NA	NA	NA	NA	NA	NA	NA	NA	NA	NA	NA	NA	NA	NA	NA	NA	NA	NA	NA	NA
GSE19442	GSM484533	23	Male	Black	PTB	South Africa	No	non_UK_born	NA	NA	Negative	NA	NA	NA	NA	NA	NA	NA	1+	M.tuberculosis	NA	NA	NA	NA	NA	1.93438	NA	Negative	NA	NA	NA	NA	NA	NA	NA	NA	NA	NA	NA	NA	NA	NA	NA	NA	NA	NA	NA	NA	NA
GSE19442	GSM484534	24	Female	Black	PTB	South Africa	Yes	non_UK_born	NA	NA	Negative	NA	NA	NA	NA	NA	NA	NA	3+	M.tuberculosis	NA	NA	NA	NA	NA	1.46876	NA	Negative	NA	NA	NA	NA	NA	NA	NA	NA	NA	NA	NA	NA	NA	NA	NA	NA	NA	NA	NA	NA	NA
GSE19442	GSM484535	38	Male	Black	PTB	South Africa	No	non_UK_born	NA	NA	Negative	NA	NA	NA	NA	NA	NA	NA	3+	M.tuberculosis	NA	NA	NA	NA	NA	0.18648	NA	Negative	NA	NA	NA	NA	NA	NA	NA	NA	NA	NA	NA	NA	NA	NA	NA	NA	NA	NA	NA	NA	NA
GSE19442	GSM484536	27	Male	Black	PTB	South Africa	No	non_UK_born	NA	NA	Negative	NA	NA	NA	NA	NA	NA	NA	2+	M.tuberculosis	NA	NA	NA	NA	NA	2.13399	NA	Negative	NA	NA	NA	NA	NA	NA	NA	NA	NA	NA	NA	NA	NA	NA	NA	NA	NA	NA	NA	NA	NA
GSE19442	GSM484537	18	Female	Black	LTBI	South Africa	No	non_UK_born	12	NA	Negative	NA	NA	NA	NA	NA	NA	NA	NA	NA	NA	NA	NA	NA	NA	-0.105685	NA	Negative	NA	NA	NA	NA	NA	NA	NA	NA	NA	NA	NA	NA	NA	NA	NA	NA	NA	NA	NA	NA	NA
GSE19442	GSM484538	20	Female	Black	LTBI	South Africa	No	non_UK_born	24	NA	Negative	NA	NA	NA	NA	NA	NA	NA	NA	NA	NA	NA	NA	NA	NA	-0.750539	NA	Negative	NA	NA	NA	NA	NA	NA	NA	NA	NA	NA	NA	NA	NA	NA	NA	NA	NA	NA	NA	NA	NA
GSE19442	GSM484539	24	Female	Black	LTBI	South Africa	Yes	non_UK_born	15	NA	Negative	NA	NA	NA	NA	NA	NA	NA	NA	NA	NA	NA	NA	NA	NA	0.145864	NA	Negative	NA	NA	NA	NA	NA	NA	NA	NA	NA	NA	NA	NA	NA	NA	NA	NA	NA	NA	NA	NA	NA
GSE19442	GSM484540	22	Male	Black	LTBI	South Africa	Yes	non_UK_born	10	NA	Negative	NA	NA	NA	NA	NA	NA	NA	NA	NA	NA	NA	NA	NA	NA	-0.95361	NA	Negative	NA	NA	NA	NA	NA	NA	NA	NA	NA	NA	NA	NA	NA	NA	NA	NA	NA	NA	NA	NA	NA
GSE19442	GSM484541	26	Male	Black	LTBI	South Africa	Yes	non_UK_born	15	NA	Negative	NA	NA	NA	NA	NA	NA	NA	NA	NA	NA	NA	NA	NA	NA	-0.113645	NA	Negative	NA	NA	NA	NA	NA	NA	NA	NA	NA	NA	NA	NA	NA	NA	NA	NA	NA	NA	NA	NA	NA
GSE19442	GSM484542	24	Male	Black	LTBI	South Africa	Yes	non_UK_born	10	NA	Negative	NA	NA	NA	NA	NA	NA	NA	NA	NA	NA	NA	NA	NA	NA	-0.144165	NA	Negative	NA	NA	NA	NA	NA	NA	NA	NA	NA	NA	NA	NA	NA	NA	NA	NA	NA	NA	NA	NA	NA
GSE19442	GSM484543	31	Male	Black	PTB	South Africa	No	non_UK_born	NA	NA	Negative	NA	NA	NA	NA	NA	NA	NA	1+	M.tuberculosis	NA	NA	NA	NA	NA	0.824865	NA	Negative	NA	NA	NA	NA	NA	NA	NA	NA	NA	NA	NA	NA	NA	NA	NA	NA	NA	NA	NA	NA	NA
GSE19442	GSM484544	41	Male	Black	PTB	South Africa	No	non_UK_born	NA	NA	Negative	NA	NA	NA	NA	NA	NA	NA	3+	M.tuberculosis	NA	NA	NA	NA	NA	-0.0225377	NA	Negative	NA	NA	NA	NA	NA	NA	NA	NA	NA	NA	NA	NA	NA	NA	NA	NA	NA	NA	NA	NA	NA
GSE19442	GSM484545	42	Male	Black	PTB	South Africa	No	non_UK_born	NA	NA	Negative	NA	NA	NA	NA	NA	NA	NA	2+	M.tuberculosis	NA	NA	NA	NA	NA	-0.526874	NA	Negative	NA	NA	NA	NA	NA	NA	NA	NA	NA	NA	NA	NA	NA	NA	NA	NA	NA	NA	NA	NA	NA
GSE19442	GSM484546	21	Female	Black	LTBI	South Africa	No	non_UK_born	20	NA	Negative	NA	NA	NA	NA	NA	NA	NA	NA	NA	NA	NA	NA	NA	NA	-0.587955	NA	Negative	NA	NA	NA	NA	NA	NA	NA	NA	NA	NA	NA	NA	NA	NA	NA	NA	NA	NA	NA	NA	NA
GSE19442	GSM484547	23	Female	Black	LTBI	South Africa	No	non_UK_born	18	NA	Negative	NA	NA	NA	NA	NA	NA	NA	NA	NA	NA	NA	NA	NA	NA	-0.386653	NA	Negative	NA	NA	NA	NA	NA	NA	NA	NA	NA	NA	NA	NA	NA	NA	NA	NA	NA	NA	NA	NA	NA
GSE19442	GSM484548	19	Female	Black	LTBI	South Africa	No	non_UK_born	12	NA	Negative	NA	NA	NA	NA	NA	NA	NA	NA	NA	NA	NA	NA	NA	NA	-1.22814	NA	Negative	NA	NA	NA	NA	NA	NA	NA	NA	NA	NA	NA	NA	NA	NA	NA	NA	NA	NA	NA	NA	NA
GSE19442	GSM484549	20	Female	Black	LTBI	South Africa	No	non_UK_born	14	NA	Negative	NA	NA	NA	NA	NA	NA	NA	NA	NA	NA	NA	NA	NA	NA	-0.218363	NA	Negative	NA	NA	NA	NA	NA	NA	NA	NA	NA	NA	NA	NA	NA	NA	NA	NA	NA	NA	NA	NA	NA
GSE19442	GSM484550	23	Female	Black	LTBI	South Africa	No	non_UK_born	15	NA	Negative	NA	NA	NA	NA	NA	NA	NA	NA	NA	NA	NA	NA	NA	NA	0.452689	NA	Negative	NA	NA	NA	NA	NA	NA	NA	NA	NA	NA	NA	NA	NA	NA	NA	NA	NA	NA	NA	NA	NA
GSE19443	GSM484551	40	Male	White	PTB	London	Yes	non_UK_Born	NA	Neutrophils	Negative	NA	test005	NA	NA	NA	NA	Minimal	nil	M.tuberculosis	nil	no_growth_6_weeks	Fully_sensitive	NA	NA	1.26195	NA	Negative	NA	NA	NA	NA	NA	NA	NA	NA	NA	NA	NA	NA	NA	NA	NA	NA	NA	NA	NA	NA	NA
GSE19443	GSM484552	40	Male	White	PTB	London	Yes	non_UK_Born	NA	Monocytes	Negative	NA	test005	NA	NA	NA	NA	Minimal	nil	M.tuberculosis	nil	no_growth_6_weeks	Fully_sensitive	NA	NA	0.254839	NA	Negative	NA	NA	NA	NA	NA	NA	NA	NA	NA	NA	NA	NA	NA	NA	NA	NA	NA	NA	NA	NA	NA
GSE19443	GSM484553	40	Male	White	PTB	London	Yes	non_UK_Born	NA	CD4	Negative	NA	test005	NA	NA	NA	NA	Minimal	nil	M.tuberculosis	nil	no_growth_6_weeks	Fully_sensitive	NA	NA	-0.827073	NA	Negative	NA	NA	NA	NA	NA	NA	NA	NA	NA	NA	NA	NA	NA	NA	NA	NA	NA	NA	NA	NA	NA
GSE19443	GSM484554	40	Male	White	PTB	London	Yes	non_UK_Born	NA	CD8	Negative	NA	test005	NA	NA	NA	NA	Minimal	nil	M.tuberculosis	nil	no_growth_6_weeks	Fully_sensitive	NA	NA	-0.873832	NA	Negative	NA	NA	NA	NA	NA	NA	NA	NA	NA	NA	NA	NA	NA	NA	NA	NA	NA	NA	NA	NA	NA
GSE19443	GSM484555	26	Male	Asian other	PTB	London	Unknown	non_UK_Born	NA	Neutrophils	Negative	NA	test028	NA	NA	NA	NA	Advanced	+	M.tuberculosis	NA	NA	Resistant Isoniazid + Ethambu	NA	NA	1.53944	NA	Negative	NA	NA	NA	NA	NA	NA	NA	NA	NA	NA	NA	NA	NA	NA	NA	NA	NA	NA	NA	NA	NA
GSE19443	GSM484556	26	Male	Asian other	PTB	London	Unknown	non_UK_Born	NA	Monocytes	Negative	NA	test028	NA	NA	NA	NA	Advanced	+	M.tuberculosis	NA	NA	Resistant Isoniazid + Ethambu	NA	NA	0.480164	NA	Negative	NA	NA	NA	NA	NA	NA	NA	NA	NA	NA	NA	NA	NA	NA	NA	NA	NA	NA	NA	NA	NA
GSE19443	GSM484557	26	Male	Asian other	PTB	London	Unknown	non_UK_Born	NA	CD4	Negative	NA	test028	NA	NA	NA	NA	Advanced	+	M.tuberculosis	NA	NA	Resistant Isoniazid + Ethambu	NA	NA	-0.886489	NA	Negative	NA	NA	NA	NA	NA	NA	NA	NA	NA	NA	NA	NA	NA	NA	NA	NA	NA	NA	NA	NA	NA
GSE19443	GSM484558	26	Male	Asian other	PTB	London	Unknown	non_UK_Born	NA	CD8	Negative	NA	test028	NA	NA	NA	NA	Advanced	+	M.tuberculosis	NA	NA	Resistant Isoniazid + Ethambu	NA	NA	-1.03672	NA	Negative	NA	NA	NA	NA	NA	NA	NA	NA	NA	NA	NA	NA	NA	NA	NA	NA	NA	NA	NA	NA	NA
GSE19443	GSM484559	33	Male	White	PTB	London	Yes	non_UK_Born	21	Neutrophils	Negative	NA	test007	NA	NA	NA	NA	Moderate	+++	M.tuberculosis	NA	NA	Resistant Streptomycin, Ethio	NA	NA	1.44582	NA	Negative	NA	NA	NA	NA	NA	NA	NA	NA	NA	NA	NA	NA	NA	NA	NA	NA	NA	NA	NA	NA	NA
GSE19443	GSM484560	33	Male	White	PTB	London	Yes	non_UK_Born	21	Monocytes	Negative	NA	test007	NA	NA	NA	NA	Moderate	+++	M.tuberculosis	NA	NA	Resistant Streptomycin, Ethio	NA	NA	0.441535	NA	Negative	NA	NA	NA	NA	NA	NA	NA	NA	NA	NA	NA	NA	NA	NA	NA	NA	NA	NA	NA	NA	NA
GSE19443	GSM484561	33	Male	White	PTB	London	Yes	non_UK_Born	21	CD4	Negative	NA	test007	NA	NA	NA	NA	Moderate	+++	M.tuberculosis	NA	NA	Resistant Streptomycin, Ethio	NA	NA	-0.935399	NA	Negative	NA	NA	NA	NA	NA	NA	NA	NA	NA	NA	NA	NA	NA	NA	NA	NA	NA	NA	NA	NA	NA
GSE19443	GSM484562	33	Male	White	PTB	London	Yes	non_UK_Born	21	CD8	Negative	NA	test007	NA	NA	NA	NA	Moderate	+++	M.tuberculosis	NA	NA	Resistant Streptomycin, Ethio	NA	NA	-0.981809	NA	Negative	NA	NA	NA	NA	NA	NA	NA	NA	NA	NA	NA	NA	NA	NA	NA	NA	NA	NA	NA	NA	NA
GSE19443	GSM484563	18	Female	South Asian	PTB	London	Yes	UK_Born	20	Neutrophils	Negative	NA	test023	NA	NA	unknown	NA	Advanced	nil	M.tuberculosis	nil	M.tuberculosis	Fully_sensitive	NA	NA	1.54319	NA	Negative	NA	NA	NA	NA	NA	NA	NA	NA	NA	NA	NA	NA	NA	NA	NA	NA	NA	NA	NA	NA	NA
GSE19443	GSM484564	18	Female	South Asian	PTB	London	Yes	UK_Born	20	Monocytes	Negative	NA	test023	NA	NA	unknown	NA	Advanced	nil	M.tuberculosis	nil	M.tuberculosis	Fully_sensitive	NA	NA	0.593667	NA	Negative	NA	NA	NA	NA	NA	NA	NA	NA	NA	NA	NA	NA	NA	NA	NA	NA	NA	NA	NA	NA	NA
GSE19443	GSM484565	18	Female	South Asian	PTB	London	Yes	UK_Born	20	CD4	Negative	NA	test023	NA	NA	unknown	NA	Advanced	nil	M.tuberculosis	nil	M.tuberculosis	Fully_sensitive	NA	NA	-0.929158	NA	Negative	NA	NA	NA	NA	NA	NA	NA	NA	NA	NA	NA	NA	NA	NA	NA	NA	NA	NA	NA	NA	NA
GSE19443	GSM484566	18	Female	South Asian	PTB	London	Yes	UK_Born	20	CD8	Negative	NA	test023	NA	NA	unknown	NA	Advanced	nil	M.tuberculosis	nil	M.tuberculosis	Fully_sensitive	NA	NA	-0.985689	NA	Negative	NA	NA	NA	NA	NA	NA	NA	NA	NA	NA	NA	NA	NA	NA	NA	NA	NA	NA	NA	NA	NA
GSE19443	GSM484567	28	Male	White	Control	London	Yes	non_UK_Born	9	Neutrophils	Negative	NA	test035	NA	NA	NA	NA	NA	NA	NA	NA	NA	NA	NA	NA	1.39109	NA	Negative	NA	NA	NA	NA	NA	NA	NA	NA	NA	NA	NA	NA	NA	NA	NA	NA	NA	NA	NA	NA	NA
GSE19443	GSM484568	28	Male	White	Control	London	Yes	non_UK_Born	9	Monocytes	Negative	NA	test035	NA	NA	NA	NA	NA	NA	NA	NA	NA	NA	NA	NA	0.40977	NA	Negative	NA	NA	NA	NA	NA	NA	NA	NA	NA	NA	NA	NA	NA	NA	NA	NA	NA	NA	NA	NA	NA
GSE19443	GSM484569	28	Male	White	Control	London	Yes	non_UK_Born	9	CD4	Negative	NA	test035	NA	NA	NA	NA	NA	NA	NA	NA	NA	NA	NA	NA	-0.924323	NA	Negative	NA	NA	NA	NA	NA	NA	NA	NA	NA	NA	NA	NA	NA	NA	NA	NA	NA	NA	NA	NA	NA
GSE19443	GSM484570	28	Male	White	Control	London	Yes	non_UK_Born	9	CD8	Negative	NA	test035	NA	NA	NA	NA	NA	NA	NA	NA	NA	NA	NA	NA	-0.975387	NA	Negative	NA	NA	NA	NA	NA	NA	NA	NA	NA	NA	NA	NA	NA	NA	NA	NA	NA	NA	NA	NA	NA
GSE19443	GSM484571	22	Male	South Asian	PTB	London	Yes	non_UK_Born	15	Neutrophils	Negative	NA	test027	NA	NA	NA	NA	Moderate	nil	M.tuberculosis	NA	NA	Fully_sensitive	NA	NA	1.30578	NA	Negative	NA	NA	NA	NA	NA	NA	NA	NA	NA	NA	NA	NA	NA	NA	NA	NA	NA	NA	NA	NA	NA
GSE19443	GSM484572	22	Male	South Asian	PTB	London	Yes	non_UK_Born	15	Monocytes	Negative	NA	test027	NA	NA	NA	NA	Moderate	nil	M.tuberculosis	NA	NA	Fully_sensitive	NA	NA	0.561075	NA	Negative	NA	NA	NA	NA	NA	NA	NA	NA	NA	NA	NA	NA	NA	NA	NA	NA	NA	NA	NA	NA	NA
GSE19443	GSM484573	22	Male	South Asian	PTB	London	Yes	non_UK_Born	15	CD4	Negative	NA	test027	NA	NA	NA	NA	Moderate	nil	M.tuberculosis	NA	NA	Fully_sensitive	NA	NA	-0.251248	NA	Negative	NA	NA	NA	NA	NA	NA	NA	NA	NA	NA	NA	NA	NA	NA	NA	NA	NA	NA	NA	NA	NA
GSE19443	GSM484574	22	Male	South Asian	PTB	London	Yes	non_UK_Born	15	CD8	Negative	NA	test027	NA	NA	NA	NA	Moderate	nil	M.tuberculosis	NA	NA	Fully_sensitive	NA	NA	-0.873905	NA	Negative	NA	NA	NA	NA	NA	NA	NA	NA	NA	NA	NA	NA	NA	NA	NA	NA	NA	NA	NA	NA	NA
GSE19443	GSM484575	21	Male	White	Control	London	Yes	UK_Born	9	Neutrophils	Negative	NA	test036	NA	NA	NA	NA	NA	NA	NA	NA	NA	NA	NA	NA	1.21434	NA	Negative	NA	NA	NA	NA	NA	NA	NA	NA	NA	NA	NA	NA	NA	NA	NA	NA	NA	NA	NA	NA	NA
GSE19443	GSM484576	21	Male	White	Control	London	Yes	UK_Born	9	Monocytes	Negative	NA	test036	NA	NA	NA	NA	NA	NA	NA	NA	NA	NA	NA	NA	0.133924	NA	Negative	NA	NA	NA	NA	NA	NA	NA	NA	NA	NA	NA	NA	NA	NA	NA	NA	NA	NA	NA	NA	NA
GSE19443	GSM484577	21	Male	White	Control	London	Yes	UK_Born	9	CD4	Negative	NA	test036	NA	NA	NA	NA	NA	NA	NA	NA	NA	NA	NA	NA	-0.887592	NA	Negative	NA	NA	NA	NA	NA	NA	NA	NA	NA	NA	NA	NA	NA	NA	NA	NA	NA	NA	NA	NA	NA
GSE19443	GSM484578	21	Male	White	Control	London	Yes	UK_Born	9	CD8	Negative	NA	test036	NA	NA	NA	NA	NA	NA	NA	NA	NA	NA	NA	NA	-0.970915	NA	Negative	NA	NA	NA	NA	NA	NA	NA	NA	NA	NA	NA	NA	NA	NA	NA	NA	NA	NA	NA	NA	NA
GSE19443	GSM484579	32	Male	Black	PTB	London	Yes	non_UK_Born	23	Neutrophils	Negative	NA	test032	NA	NA	NA	NA	Moderate	nil	M.tuberculosis	nil	M.tuberculosis	Fully_sensitive	NA	NA	1.28995	NA	Negative	NA	NA	NA	NA	NA	NA	NA	NA	NA	NA	NA	NA	NA	NA	NA	NA	NA	NA	NA	NA	NA
GSE19443	GSM484580	32	Male	Black	PTB	London	Yes	non_UK_Born	23	Monocytes	Negative	NA	test032	NA	NA	NA	NA	Moderate	nil	M.tuberculosis	nil	M.tuberculosis	Fully_sensitive	NA	NA	0.430862	NA	Negative	NA	NA	NA	NA	NA	NA	NA	NA	NA	NA	NA	NA	NA	NA	NA	NA	NA	NA	NA	NA	NA
GSE19443	GSM484581	32	Male	Black	PTB	London	Yes	non_UK_Born	23	CD4	Negative	NA	test032	NA	NA	NA	NA	Moderate	nil	M.tuberculosis	nil	M.tuberculosis	Fully_sensitive	NA	NA	-0.881336	NA	Negative	NA	NA	NA	NA	NA	NA	NA	NA	NA	NA	NA	NA	NA	NA	NA	NA	NA	NA	NA	NA	NA
GSE19443	GSM484582	32	Male	Black	PTB	London	Yes	non_UK_Born	23	CD8	Negative	NA	test032	NA	NA	NA	NA	Moderate	nil	M.tuberculosis	nil	M.tuberculosis	Fully_sensitive	NA	NA	-1.01273	NA	Negative	NA	NA	NA	NA	NA	NA	NA	NA	NA	NA	NA	NA	NA	NA	NA	NA	NA	NA	NA	NA	NA
GSE19443	GSM484583	55	Female	South Asian	PTB	London	Yes	non_UK_Born	NA	Neutrophils	Negative	NA	test049	NA	NA	NA	NA	Advanced	NA	NA	nil	M.tuberculosis	Fully_sensitive	NA	NA	1.40562	NA	Negative	NA	NA	NA	NA	NA	NA	NA	NA	NA	NA	NA	NA	NA	NA	NA	NA	NA	NA	NA	NA	NA
GSE19443	GSM484584	55	Female	South Asian	PTB	London	Yes	non_UK_Born	NA	Monocytes	Negative	NA	test049	NA	NA	NA	NA	Advanced	NA	NA	nil	M.tuberculosis	Fully_sensitive	NA	NA	0.286658	NA	Negative	NA	NA	NA	NA	NA	NA	NA	NA	NA	NA	NA	NA	NA	NA	NA	NA	NA	NA	NA	NA	NA
GSE19443	GSM484585	55	Female	South Asian	PTB	London	Yes	non_UK_Born	NA	CD4	Negative	NA	test049	NA	NA	NA	NA	Advanced	NA	NA	nil	M.tuberculosis	Fully_sensitive	NA	NA	-0.743682	NA	Negative	NA	NA	NA	NA	NA	NA	NA	NA	NA	NA	NA	NA	NA	NA	NA	NA	NA	NA	NA	NA	NA
GSE19443	GSM484586	55	Female	South Asian	PTB	London	Yes	non_UK_Born	NA	CD8	Negative	NA	test049	NA	NA	NA	NA	Advanced	NA	NA	nil	M.tuberculosis	Fully_sensitive	NA	NA	-1.02918	NA	Negative	NA	NA	NA	NA	NA	NA	NA	NA	NA	NA	NA	NA	NA	NA	NA	NA	NA	NA	NA	NA	NA
GSE19443	GSM484587	49	Female	South Asian	Control	London	Yes	non_UK_Born	0	Neutrophils	Negative	NA	test037	NA	NA	NA	NA	NA	NA	NA	NA	NA	NA	NA	NA	1.58853	NA	Negative	NA	NA	NA	NA	NA	NA	NA	NA	NA	NA	NA	NA	NA	NA	NA	NA	NA	NA	NA	NA	NA
GSE19443	GSM484588	49	Female	South Asian	Control	London	Yes	non_UK_Born	0	Monocytes	Negative	NA	test037	NA	NA	NA	NA	NA	NA	NA	NA	NA	NA	NA	NA	0.193823	NA	Negative	NA	NA	NA	NA	NA	NA	NA	NA	NA	NA	NA	NA	NA	NA	NA	NA	NA	NA	NA	NA	NA
GSE19443	GSM484589	49	Female	South Asian	Control	London	Yes	non_UK_Born	0	CD4	Negative	NA	test037	NA	NA	NA	NA	NA	NA	NA	NA	NA	NA	NA	NA	-0.850637	NA	Negative	NA	NA	NA	NA	NA	NA	NA	NA	NA	NA	NA	NA	NA	NA	NA	NA	NA	NA	NA	NA	NA
GSE19443	GSM484590	49	Female	South Asian	Control	London	Yes	non_UK_Born	0	CD8	Negative	NA	test037	NA	NA	NA	NA	NA	NA	NA	NA	NA	NA	NA	NA	-1.01019	NA	Negative	NA	NA	NA	NA	NA	NA	NA	NA	NA	NA	NA	NA	NA	NA	NA	NA	NA	NA	NA	NA	NA
GSE19443	GSM484591	41	Female	South Asian	Control	London	Yes	non_UK_Born	10	Neutrophils	Negative	NA	test038	NA	NA	NA	NA	NA	NA	NA	NA	NA	NA	NA	NA	1.68674	NA	Negative	NA	NA	NA	NA	NA	NA	NA	NA	NA	NA	NA	NA	NA	NA	NA	NA	NA	NA	NA	NA	NA
GSE19443	GSM484592	41	Female	South Asian	Control	London	Yes	non_UK_Born	10	Monocytes	Negative	NA	test038	NA	NA	NA	NA	NA	NA	NA	NA	NA	NA	NA	NA	0.450647	NA	Negative	NA	NA	NA	NA	NA	NA	NA	NA	NA	NA	NA	NA	NA	NA	NA	NA	NA	NA	NA	NA	NA
GSE19443	GSM484593	41	Female	South Asian	Control	London	Yes	non_UK_Born	10	CD4	Negative	NA	test038	NA	NA	NA	NA	NA	NA	NA	NA	NA	NA	NA	NA	-0.992313	NA	Negative	NA	NA	NA	NA	NA	NA	NA	NA	NA	NA	NA	NA	NA	NA	NA	NA	NA	NA	NA	NA	NA
GSE19443	GSM484594	41	Female	South Asian	Control	London	Yes	non_UK_Born	10	CD8	Negative	NA	test038	NA	NA	NA	NA	NA	NA	NA	NA	NA	NA	NA	NA	-1.0498	NA	Negative	NA	NA	NA	NA	NA	NA	NA	NA	NA	NA	NA	NA	NA	NA	NA	NA	NA	NA	NA	NA	NA
GSE19444	GSM484595	66	Male	Black	PTB	London	No	non_UK_Born	23	Whole Blood	Negative	NA	NA	NA	NA	NA	NA	Advanced	NA	NA	+++	M.tuberculosis	Resistant Isoniazid	NA	NA	1.51747	NA	Negative	NA	NA	NA	NA	NA	NA	NA	NA	NA	NA	NA	NA	NA	NA	NA	NA	NA	NA	NA	NA	NA
GSE19444	GSM484596	41	Male	Black	PTB	London	Yes	non_UK_Born	13	Whole Blood	Negative	NA	NA	NA	NA	NA	NA	Advanced	nil	no_growth_6_weeks	++	M.tuberculosis	Resistant Pyrazinamide	NA	NA	1.69801	NA	Negative	NA	NA	NA	NA	NA	NA	NA	NA	NA	NA	NA	NA	NA	NA	NA	NA	NA	NA	NA	NA	NA
GSE19444	GSM484597	40	Female	Black	PTB	London	Yes	non_UK_Born	17	Whole Blood	Negative	NA	NA	NA	NA	NA	NA	Minimal	NA	NA	nil	M.tuberculosis	Resistant Isoniazid	NA	NA	-1.37446	NA	Negative	NA	NA	NA	NA	NA	NA	NA	NA	NA	NA	NA	NA	NA	NA	NA	NA	NA	NA	NA	NA	NA
GSE19444	GSM484598	58	Male	White	PTB	London	No	UK_Born	NA	Whole Blood	Negative	NA	NA	NA	NA	NA	NA	Advanced	+++	M.tuberculosis	NA	NA	Fully_sensitive	NA	NA	0.765724	NA	Negative	NA	NA	NA	NA	NA	NA	NA	NA	NA	NA	NA	NA	NA	NA	NA	NA	NA	NA	NA	NA	NA
GSE19444	GSM484599	41	Male	Asian other	LTBI	London	Yes	non_UK_Born	21	Whole Blood	Negative	NA	NA	NA	Contact_Screen	pulm	Sm+	No disease	NA	NA	NA	NA	NA	Positive	NA	-0.122656	NA	Negative	NA	NA	NA	NA	NA	NA	NA	NA	NA	NA	NA	NA	NA	NA	NA	NA	NA	NA	NA	NA	NA
GSE19444	GSM484600	35	Female	White	LTBI	London	Yes	UK_Born	17	Whole Blood	Negative	NA	NA	NA	Contact_Screen	pulm	Sm+	No disease	NA	NA	NA	NA	NA	Positive	NA	0.0451815	NA	Negative	NA	NA	NA	NA	NA	NA	NA	NA	NA	NA	NA	NA	NA	NA	NA	NA	NA	NA	NA	NA	NA
GSE19444	GSM484601	28	Male	South Asian	LTBI	London	No	non_UK_Born	23	Whole Blood	Negative	NA	NA	NA	Not_Known	NA	NA	No disease	NA	NA	NA	NA	NA	Positive	NA	-0.420104	NA	Negative	NA	NA	NA	NA	NA	NA	NA	NA	NA	NA	NA	NA	NA	NA	NA	NA	NA	NA	NA	NA	NA
GSE19444	GSM484602	53	Female	Asian other	LTBI	London	Yes	non_UK_Born	20	Whole Blood	Negative	NA	NA	NA	Contact_Screen	unknown	NA	No disease	nil	no_growth_6_weeks	NA	NA	NA	Positive	NA	0.355956	NA	Negative	NA	NA	NA	NA	NA	NA	NA	NA	NA	NA	NA	NA	NA	NA	NA	NA	NA	NA	NA	NA	NA
GSE19444	GSM484603	28	Male	White	Control	London	Yes	non_UK_Born	9	Whole Blood	Negative	NA	NA	NA	NA	NA	NA	NA	NA	NA	NA	NA	NA	NA	NA	-0.830682	NA	Negative	NA	NA	NA	NA	NA	NA	NA	NA	NA	NA	NA	NA	NA	NA	NA	NA	NA	NA	NA	NA	NA
GSE19444	GSM484604	21	Male	White	Control	London	Yes	UK_Born	9	Whole Blood	Negative	NA	NA	NA	NA	NA	NA	NA	NA	NA	NA	NA	NA	NA	NA	-0.548418	NA	Negative	NA	NA	NA	NA	NA	NA	NA	NA	NA	NA	NA	NA	NA	NA	NA	NA	NA	NA	NA	NA	NA
GSE19444	GSM484605	40	Male	White	PTB	London	Yes	non_UK_Born	NA	Whole Blood	Negative	NA	NA	NA	NA	NA	NA	Minimal	nil	M.tuberculosis	nil	no_growth_6_weeks	Fully_sensitive	NA	NA	1.45335	NA	Negative	NA	NA	NA	NA	NA	NA	NA	NA	NA	NA	NA	NA	NA	NA	NA	NA	NA	NA	NA	NA	NA
GSE19444	GSM484606	33	Male	White	PTB	London	Yes	non_UK_Born	21	Whole Blood	Negative	NA	NA	NA	NA	NA	NA	Moderate	+++	M.tuberculosis	NA	NA	Resistant Streptomycin, Ethio	NA	NA	1.07006	NA	Negative	NA	NA	NA	NA	NA	NA	NA	NA	NA	NA	NA	NA	NA	NA	NA	NA	NA	NA	NA	NA	NA
GSE19444	GSM484607	19	Female	Black	LTBI	London	Yes	non_UK_Born	16	Whole Blood	Negative	NA	NA	NA	Contact_Screen	pulm	Sm+	No disease	NA	NA	NA	NA	NA	Positive	NA	2.10366	NA	Negative	NA	NA	NA	NA	NA	NA	NA	NA	NA	NA	NA	NA	NA	NA	NA	NA	NA	NA	NA	NA	NA
GSE19444	GSM484608	20	Female	Black	LTBI	London	Yes	non_UK_Born	16	Whole Blood	Negative	NA	NA	NA	New_Entrant	NA	NA	No disease	NA	NA	NA	NA	NA	Positive	NA	0.514173	NA	Negative	NA	NA	NA	NA	NA	NA	NA	NA	NA	NA	NA	NA	NA	NA	NA	NA	NA	NA	NA	NA	NA
GSE19444	GSM484609	31	Male	Other	LTBI	London	Yes	non_UK_Born	24	Whole Blood	Negative	NA	NA	NA	Contact_Screen	unknown	NA	No disease	NA	NA	NA	NA	NA	Positive	NA	0.590185	NA	Negative	NA	NA	NA	NA	NA	NA	NA	NA	NA	NA	NA	NA	NA	NA	NA	NA	NA	NA	NA	NA	NA
GSE19444	GSM484610	55	Female	South Asian	PTB	London	Yes	non_UK_Born	NA	Whole Blood	Negative	NA	NA	NA	NA	NA	NA	Advanced	NA	NA	nil	M.tuberculosis	Fully_sensitive	NA	NA	-0.291432	NA	Negative	NA	NA	NA	NA	NA	NA	NA	NA	NA	NA	NA	NA	NA	NA	NA	NA	NA	NA	NA	NA	NA
GSE19444	GSM484611	18	Female	South Asian	PTB	London	Yes	UK_Born	20	Whole Blood	Negative	NA	NA	NA	NA	unknown	NA	Advanced	nil	M.tuberculosis	nil	M.tuberculosis	Fully_sensitive	NA	NA	1.8138	NA	Negative	NA	NA	NA	NA	NA	NA	NA	NA	NA	NA	NA	NA	NA	NA	NA	NA	NA	NA	NA	NA	NA
GSE19444	GSM484612	49	Female	South Asian	Control	London	Yes	non_UK_Born	0	Whole Blood	Negative	NA	NA	NA	NA	NA	NA	NA	NA	NA	NA	NA	NA	NA	NA	0.808448	NA	Negative	NA	NA	NA	NA	NA	NA	NA	NA	NA	NA	NA	NA	NA	NA	NA	NA	NA	NA	NA	NA	NA
GSE19444	GSM484613	41	Female	South Asian	Control	London	Yes	non_UK_Born	10	Whole Blood	Negative	NA	NA	NA	NA	NA	NA	NA	NA	NA	NA	NA	NA	NA	NA	0.398961	NA	Negative	NA	NA	NA	NA	NA	NA	NA	NA	NA	NA	NA	NA	NA	NA	NA	NA	NA	NA	NA	NA	NA
GSE19444	GSM484614	49	Male	South Asian	LTBI	London	Yes	non_UK_Born	32	Whole Blood	Negative	NA	NA	NA	Contact_Screen	pulm	unknown	Minimal	NA	NA	NA	NA	NA	Positive	NA	-0.909106	NA	Negative	NA	NA	NA	NA	NA	NA	NA	NA	NA	NA	NA	NA	NA	NA	NA	NA	NA	NA	NA	NA	NA
GSE19444	GSM484615	45	Male	White	LTBI	London	Yes	non_UK_Born	45	Whole Blood	Negative	NA	NA	NA	Contact_Screen	pulm	Sm+	Moderate	NA	NA	NA	NA	NA	Positive	NA	1.15694	NA	Negative	NA	NA	NA	NA	NA	NA	NA	NA	NA	NA	NA	NA	NA	NA	NA	NA	NA	NA	NA	NA	NA
GSE19444	GSM484616	23	Male	Black	LTBI	London	Yes	non_UK_Born	28	Whole Blood	Negative	NA	NA	NA	New_Entrant	NA	NA	No disease	NA	NA	NA	NA	NA	Positive	NA	-0.179361	NA	Negative	NA	NA	NA	NA	NA	NA	NA	NA	NA	NA	NA	NA	NA	NA	NA	NA	NA	NA	NA	NA	NA
GSE19444	GSM484617	26	Male	Black	LTBI	London	Yes	non_UK_Born	17	Whole Blood	Negative	NA	NA	NA	Contact_Screen	pulm	Sm+	No disease	NA	NA	NA	NA	NA	Positive	NA	-0.719795	NA	Negative	NA	NA	NA	NA	NA	NA	NA	NA	NA	NA	NA	NA	NA	NA	NA	NA	NA	NA	NA	NA	NA
GSE19444	GSM484618	31	Male	Black	PTB	London	Unknown	non_UK_Born	25	Whole Blood	Negative	NA	NA	NA	NA	pulm	unknown	Minimal	NA	M.tuberculosis	NA	NA	Resistant Streptomycin	NA	NA	1.13709	NA	Negative	NA	NA	NA	NA	NA	NA	NA	NA	NA	NA	NA	NA	NA	NA	NA	NA	NA	NA	NA	NA	NA
GSE19444	GSM484619	22	Male	South Asian	PTB	London	Yes	non_UK_Born	15	Whole Blood	Negative	NA	NA	NA	NA	NA	NA	Moderate	nil	M.tuberculosis	NA	NA	Fully_sensitive	NA	NA	1.38592	NA	Negative	NA	NA	NA	NA	NA	NA	NA	NA	NA	NA	NA	NA	NA	NA	NA	NA	NA	NA	NA	NA	NA
GSE19444	GSM484620	26	Male	Asian other	PTB	London	Unknown	non_UK_Born	NA	Whole Blood	Negative	NA	NA	NA	NA	NA	NA	Advanced	+	M.tuberculosis	NA	NA	Resistant Isoniazid + Ethambu	NA	NA	-0.166263	NA	Negative	NA	NA	NA	NA	NA	NA	NA	NA	NA	NA	NA	NA	NA	NA	NA	NA	NA	NA	NA	NA	NA
GSE19444	GSM484621	32	Male	Black	PTB	London	Yes	non_UK_Born	23	Whole Blood	Negative	NA	NA	NA	NA	NA	NA	Moderate	nil	M.tuberculosis	nil	M.tuberculosis	Fully_sensitive	NA	NA	-0.393598	NA	Negative	NA	NA	NA	NA	NA	NA	NA	NA	NA	NA	NA	NA	NA	NA	NA	NA	NA	NA	NA	NA	NA
GSE19444	GSM484622	33	Female	Black	Control	London	Yes	non_UK_Born	5	Whole Blood	Negative	NA	NA	NA	NA	NA	NA	NA	NA	NA	NA	NA	NA	NA	NA	0.194149	NA	Negative	NA	NA	NA	NA	NA	NA	NA	NA	NA	NA	NA	NA	NA	NA	NA	NA	NA	NA	NA	NA	NA
GSE19444	GSM484623	28	Female	Black	Control	London	Yes	non_UK_Born	13	Whole Blood	Negative	NA	NA	NA	NA	NA	NA	NA	NA	NA	NA	NA	NA	NA	NA	-0.973501	NA	Negative	NA	NA	NA	NA	NA	NA	NA	NA	NA	NA	NA	NA	NA	NA	NA	NA	NA	NA	NA	NA	NA
GSE19444	GSM484624	33	Male	South Asian	LTBI	London	No	non_UK_Born	7	Whole Blood	Negative	NA	NA	NA	Contact_Screen	pulm	unknown	Minimal	NA	NA	NA	NA	NA	Positive	NA	-0.694402	NA	Negative	NA	NA	NA	NA	NA	NA	NA	NA	NA	NA	NA	NA	NA	NA	NA	NA	NA	NA	NA	NA	NA
GSE19444	GSM484625	29	Male	Black	LTBI	London	No	non_UK_Born	12	Whole Blood	Negative	NA	NA	NA	Not_Known	NA	NA	No disease	NA	NA	NA	NA	NA	Positive	NA	-2.44741	NA	Negative	NA	NA	NA	NA	NA	NA	NA	NA	NA	NA	NA	NA	NA	NA	NA	NA	NA	NA	NA	NA	NA
GSE19444	GSM484626	44	Female	Black	LTBI	London	Yes	non_UK_Born	18	Whole Blood	Negative	NA	NA	NA	Contact_Screen	pulm	unknown	No disease	NA	NA	NA	NA	NA	Positive	NA	-1.35041	NA	Negative	NA	NA	NA	NA	NA	NA	NA	NA	NA	NA	NA	NA	NA	NA	NA	NA	NA	NA	NA	NA	NA
GSE19444	GSM484627	24	Female	White	LTBI	London	Yes	non_UK_Born	27	Whole Blood	Negative	NA	NA	NA	Contact_Screen	pulm	Sm+	No disease	NA	NA	NA	NA	NA	Positive	NA	0.837663	NA	Negative	NA	NA	NA	NA	NA	NA	NA	NA	NA	NA	NA	NA	NA	NA	NA	NA	NA	NA	NA	NA	NA
GSE19444	GSM484628	34	Female	Other	PTB	London	Yes	non_UK_Born	38	Whole Blood	Negative	NA	NA	NA	NA	NA	NA	Moderate	nil	M.tuberculosis	nil	M.tuberculosis	Fully_sensitive	NA	NA	-0.695301	NA	Negative	NA	NA	NA	NA	NA	NA	NA	NA	NA	NA	NA	NA	NA	NA	NA	NA	NA	NA	NA	NA	NA
GSE19444	GSM484629	75	Male	South Asian	PTB	London	Unknown	UK_Born	NA	Whole Blood	Negative	NA	NA	NA	NA	NA	NA	No disease	nil	M.tuberculosis	NA	NA	Fully_sensitive	NA	NA	0.173857	NA	Negative	NA	NA	NA	NA	NA	NA	NA	NA	NA	NA	NA	NA	NA	NA	NA	NA	NA	NA	NA	NA	NA
GSE19444	GSM484630	64	Female	South Asian	PTB	London	Unknown	non_UK_Born	25	Whole Blood	Negative	NA	NA	NA	NA	NA	NA	No disease	NA	NA	NA	NA	NA	NA	NA	0.289832	NA	Negative	NA	NA	NA	NA	NA	NA	NA	NA	NA	NA	NA	NA	NA	NA	NA	NA	NA	NA	NA	NA	NA
GSE19444	GSM484631	53	Male	White	PTB	London	Yes	UK_Born	0	Whole Blood	Negative	NA	NA	NA	NA	NA	NA	Advanced	scanty	M.tuberculosis	+	M.tuberculosis	Fully_sensitive	NA	NA	0.448155	NA	Negative	NA	NA	NA	NA	NA	NA	NA	NA	NA	NA	NA	NA	NA	NA	NA	NA	NA	NA	NA	NA	NA
GSE19444	GSM484632	23	Female	White	Control	London	Yes	UK_Born	5	Whole Blood	Negative	NA	NA	NA	NA	NA	NA	NA	NA	NA	NA	NA	NA	NA	NA	-1.02696	NA	Negative	NA	NA	NA	NA	NA	NA	NA	NA	NA	NA	NA	NA	NA	NA	NA	NA	NA	NA	NA	NA	NA
GSE19444	GSM484633	29	Male	Other	Control	London	Yes	non_UK_Born	6	Whole Blood	Negative	NA	NA	NA	NA	NA	NA	NA	NA	NA	NA	NA	NA	NA	NA	-0.867963	NA	Negative	NA	NA	NA	NA	NA	NA	NA	NA	NA	NA	NA	NA	NA	NA	NA	NA	NA	NA	NA	NA	NA
GSE19444	GSM484634	22	Female	Asian other	Control	London	Yes	non_UK_Born	0	Whole Blood	Negative	NA	NA	NA	NA	NA	NA	NA	NA	NA	NA	NA	NA	NA	NA	0.182136	NA	Negative	NA	NA	NA	NA	NA	NA	NA	NA	NA	NA	NA	NA	NA	NA	NA	NA	NA	NA	NA	NA	NA
GSE19444	GSM484635	68	Male	Black	LTBI	London	Yes	non_UK_Born	21	Whole Blood	Negative	NA	NA	NA	Contact_Screen	pulm	Sm+	No disease	NA	NA	NA	NA	NA	Positive	NA	-1.38767	NA	Negative	NA	NA	NA	NA	NA	NA	NA	NA	NA	NA	NA	NA	NA	NA	NA	NA	NA	NA	NA	NA	NA
GSE19444	GSM484636	24	Female	Other	LTBI	London	Yes	non_UK_Born	21	Whole Blood	Negative	NA	NA	NA	Contact_Screen	pulm	Sm+	No disease	NA	NA	NA	NA	NA	Positive	NA	0.243023	NA	Negative	NA	NA	NA	NA	NA	NA	NA	NA	NA	NA	NA	NA	NA	NA	NA	NA	NA	NA	NA	NA	NA
GSE19444	GSM484637	27	Female	Asian other	LTBI	London	Yes	non_UK_Born	25	Whole Blood	Negative	NA	NA	NA	Contact_Screen	pulm	Sm+	No disease	NA	NA	NA	NA	NA	Positive	NA	0.048086	NA	Negative	NA	NA	NA	NA	NA	NA	NA	NA	NA	NA	NA	NA	NA	NA	NA	NA	NA	NA	NA	NA	NA
GSE19444	GSM484638	28	Male	White	PTB	London	Yes	non_UK_Born	NA	Whole Blood	Negative	NA	NA	NA	NA	NA	NA	Advanced	+	M.tuberculosis	NA	NA	Fully_sensitive	NA	NA	0.878824	NA	Negative	NA	NA	NA	NA	NA	NA	NA	NA	NA	NA	NA	NA	NA	NA	NA	NA	NA	NA	NA	NA	NA
GSE19444	GSM484639	54	Female	White	PTB	London	Yes	UK_Born	0	Whole Blood	Negative	NA	NA	NA	NA	NA	NA	No disease	nil	M.tuberculosis	NA	NA	Fully_sensitive	NA	NA	0.226331	NA	Negative	NA	NA	NA	NA	NA	NA	NA	NA	NA	NA	NA	NA	NA	NA	NA	NA	NA	NA	NA	NA	NA
GSE19444	GSM484640	60	Female	South Asian	LTBI	London	Yes	non_UK_Born	21	Whole Blood	Negative	NA	NA	NA	Contact_Screen	pulm	Sm+	No disease	NA	NA	NA	NA	NA	Positive	NA	0.956874	NA	Negative	NA	NA	NA	NA	NA	NA	NA	NA	NA	NA	NA	NA	NA	NA	NA	NA	NA	NA	NA	NA	NA
GSE19444	GSM484641	23	Male	South Asian	PTB	London	Unknown	non_UK_Born	NA	Whole Blood	Negative	NA	NA	NA	NA	NA	NA	Moderate	+	M.tuberculosis	NA	NA	Fully_sensitive	NA	NA	-0.720024	NA	Negative	NA	NA	NA	NA	NA	NA	NA	NA	NA	NA	NA	NA	NA	NA	NA	NA	NA	NA	NA	NA	NA
GSE19444	GSM484642	78	Female	White	PTB	London	Unknown	UK_Born	NA	Whole Blood	Negative	NA	NA	NA	NA	NA	NA	Minimal	+	M.tuberculosis	NA	NA	Fully_sensitive	NA	NA	0.331084	NA	Negative	NA	NA	NA	NA	NA	NA	NA	NA	NA	NA	NA	NA	NA	NA	NA	NA	NA	NA	NA	NA	NA
GSE19444	GSM484643	42	Female	Asian other	LTBI	London	Yes	non_UK_Born	30	Whole Blood	Negative	NA	NA	NA	Contact_Screen	pulm	Sm+	No disease	NA	NA	NA	NA	NA	Positive	NA	-1.67749	NA	Negative	NA	NA	NA	NA	NA	NA	NA	NA	NA	NA	NA	NA	NA	NA	NA	NA	NA	NA	NA	NA	NA
GSE19444	GSM484644	43	Male	Black	Control	London	Yes	non_UK_Born	12	Whole Blood	Negative	NA	NA	NA	NA	NA	NA	NA	NA	NA	NA	NA	NA	NA	NA	-2.15303	NA	Negative	NA	NA	NA	NA	NA	NA	NA	NA	NA	NA	NA	NA	NA	NA	NA	NA	NA	NA	NA	NA	NA
GSE19444	GSM484645	20	Female	White	PTB	London	Yes	non_UK_Born	NA	Whole Blood	Negative	NA	NA	NA	NA	NA	NA	Minimal	NA	NA	nil	M.tuberculosis	Fully_sensitive	NA	NA	-0.0958643	NA	Negative	NA	NA	NA	NA	NA	NA	NA	NA	NA	NA	NA	NA	NA	NA	NA	NA	NA	NA	NA	NA	NA
GSE19444	GSM484646	41	Female	Asian other	LTBI	London	Yes	non_UK_Born	26	Whole Blood	Negative	NA	NA	NA	Contact_Screen	pulm	Sm+	No disease	NA	NA	NA	NA	NA	Positive	NA	-0.19349	NA	Negative	NA	NA	NA	NA	NA	NA	NA	NA	NA	NA	NA	NA	NA	NA	NA	NA	NA	NA	NA	NA	NA
GSE19444	GSM484647	23	Female	South Asian	Control	London	Yes	UK_Born	0	Whole Blood	Negative	NA	NA	NA	NA	NA	NA	NA	NA	NA	NA	NA	NA	NA	NA	-0.678839	NA	Negative	NA	NA	NA	NA	NA	NA	NA	NA	NA	NA	NA	NA	NA	NA	NA	NA	NA	NA	NA	NA	NA
GSE19444	GSM484648	32	Male	Asian other	Control	London	Yes	non_UK_Born	14	Whole Blood	Negative	NA	NA	NA	NA	NA	NA	NA	NA	NA	NA	NA	NA	NA	NA	-0.70671	NA	Negative	NA	NA	NA	NA	NA	NA	NA	NA	NA	NA	NA	NA	NA	NA	NA	NA	NA	NA	NA	NA	NA
GSE22098	GSM549324	55	Male	Caucasian	OD	NA	NA	NA	NA	Whole Blood	Negative	NA	NA	NA	NA	NA	NA	NA	NA	NA	NA	NA	NA	NA	NA	0.476224	NA	Negative	NA	NA	Still	Positive	Negative	Negative	Negative	Negative	NA	NA	NA	NA	NA	NA	NA	NA	NA	NA	NA	NA	NA
GSE22098	GSM549325	22	Male	Asian	OD	NA	NA	NA	NA	Whole Blood	Negative	NA	NA	NA	NA	NA	NA	NA	NA	NA	NA	NA	NA	NA	NA	1.18939	NA	Negative	NA	NA	Still	Positive	Negative	Negative	Negative	Negative	NA	NA	NA	NA	NA	NA	NA	NA	NA	NA	NA	NA	NA
GSE22098	GSM549326	83	Male	Caucasian	OD	NA	NA	NA	NA	Whole Blood	Negative	NA	NA	NA	NA	NA	NA	NA	NA	NA	NA	NA	NA	NA	NA	1.7022	NA	Negative	NA	NA	Still	Positive	Negative	Negative	Negative	Negative	NA	NA	NA	NA	NA	NA	NA	NA	NA	NA	NA	NA	NA
GSE22098	GSM549327	42	Female	Caucasian	OD	NA	NA	NA	NA	Whole Blood	Negative	NA	NA	NA	NA	NA	NA	NA	NA	NA	NA	NA	NA	NA	NA	0.645713	NA	Negative	NA	NA	Still	Positive	Negative	Negative	Negative	Negative	NA	NA	NA	NA	NA	NA	NA	NA	NA	NA	NA	NA	NA
GSE22098	GSM549328	51	Male	Caucasian	OD	NA	NA	NA	NA	Whole Blood	Negative	NA	NA	NA	NA	NA	NA	NA	NA	NA	NA	NA	NA	NA	NA	1.13552	NA	Negative	NA	NA	Still	Positive	Negative	Negative	Negative	Negative	NA	NA	NA	NA	NA	NA	NA	NA	NA	NA	NA	NA	NA
GSE22098	GSM549329	19	Male	Caucasian	OD	NA	NA	NA	NA	Whole Blood	Negative	NA	NA	NA	NA	NA	NA	NA	NA	NA	NA	NA	NA	NA	NA	3.0577	NA	Negative	NA	NA	Still	Positive	Negative	Negative	Negative	Negative	NA	NA	NA	NA	NA	NA	NA	NA	NA	NA	NA	NA	NA
GSE22098	GSM549331	34	Male	Caucasian	OD	NA	NA	NA	NA	Whole Blood	Negative	NA	NA	NA	NA	NA	NA	NA	NA	NA	NA	NA	NA	NA	NA	-0.306735	NA	Negative	NA	NA	Still	Positive	Negative	Negative	Negative	Negative	NA	NA	NA	NA	NA	NA	NA	NA	NA	NA	NA	NA	NA
GSE22098	GSM549333	38	Female	Caucasian	OD	NA	NA	NA	NA	Whole Blood	Negative	NA	NA	NA	NA	NA	NA	NA	NA	NA	NA	NA	NA	NA	NA	0.505182	NA	Negative	NA	NA	Still	Positive	Negative	Negative	Negative	Negative	NA	NA	NA	NA	NA	NA	NA	NA	NA	NA	NA	NA	NA
GSE22098	GSM549335	48	Female	Hispanic	OD	NA	NA	NA	NA	Whole Blood	Negative	NA	NA	NA	NA	NA	NA	NA	NA	NA	NA	NA	NA	NA	NA	0.686811	NA	Negative	NA	NA	Still	Positive	Negative	Negative	Negative	Negative	NA	NA	NA	NA	NA	NA	NA	NA	NA	NA	NA	NA	NA
GSE22098	GSM549336	54	Male	Caucasian	OD	NA	NA	NA	NA	Whole Blood	Negative	NA	NA	NA	NA	NA	NA	NA	NA	NA	NA	NA	NA	NA	NA	1.11748	NA	Negative	NA	NA	Still	Positive	Negative	Negative	Negative	Negative	NA	NA	NA	NA	NA	NA	NA	NA	NA	NA	NA	NA	NA
GSE22098	GSM549338	29	Female	Caucasian	OD	NA	NA	NA	NA	Whole Blood	Negative	NA	NA	NA	NA	NA	NA	NA	NA	NA	NA	NA	NA	NA	NA	-0.14053	NA	Negative	NA	NA	Still	Positive	Negative	Negative	Negative	Negative	NA	NA	NA	NA	NA	NA	NA	NA	NA	NA	NA	NA	NA
GSE22098	GSM549340	37	Female	Native American	OD	NA	NA	NA	NA	Whole Blood	Negative	NA	NA	NA	NA	NA	NA	NA	NA	NA	NA	NA	NA	NA	NA	0.437053	NA	Negative	NA	NA	Still	Positive	Negative	Negative	Negative	Negative	NA	NA	NA	NA	NA	NA	NA	NA	NA	NA	NA	NA	NA
GSE22098	GSM549342	17	Male	Caucasian	OD	NA	NA	NA	NA	Whole Blood	Negative	NA	NA	NA	NA	NA	NA	NA	NA	NA	NA	NA	NA	NA	NA	0.309143	NA	Negative	NA	NA	Still	Positive	Negative	Negative	Negative	Negative	NA	NA	NA	NA	NA	NA	NA	NA	NA	NA	NA	NA	NA
GSE22098	GSM549344	64	Female	Caucasian	OD	NA	NA	NA	NA	Whole Blood	Negative	NA	NA	NA	NA	NA	NA	NA	NA	NA	NA	NA	NA	NA	NA	0.182511	NA	Negative	NA	NA	Still	Positive	Negative	Negative	Negative	Negative	NA	NA	NA	NA	NA	NA	NA	NA	NA	NA	NA	NA	NA
GSE22098	GSM549345	31	Male	Caucasian	OD	NA	NA	NA	NA	Whole Blood	Negative	NA	NA	NA	NA	NA	NA	NA	NA	NA	NA	NA	NA	NA	NA	0.726369	NA	Negative	NA	NA	Still	Positive	Negative	Negative	Negative	Negative	NA	NA	NA	NA	NA	NA	NA	NA	NA	NA	NA	NA	NA
GSE22098	GSM549346	70	Male	Caucasian	OD	NA	NA	NA	NA	Whole Blood	Negative	NA	NA	NA	NA	NA	NA	NA	NA	NA	NA	NA	NA	NA	NA	0.0240581	NA	Negative	NA	NA	Still	Positive	Negative	Negative	Negative	Negative	NA	NA	NA	NA	NA	NA	NA	NA	NA	NA	NA	NA	NA
GSE22098	GSM549347	27	Male	Caucasian	OD	NA	NA	NA	NA	Whole Blood	Negative	NA	NA	NA	NA	NA	NA	NA	NA	NA	NA	NA	NA	NA	NA	2.46288	NA	Negative	NA	NA	Still	Positive	Negative	Negative	Negative	Negative	NA	NA	NA	NA	NA	NA	NA	NA	NA	NA	NA	NA	NA
GSE22098	GSM549348	63	Female	Native American	OD	NA	NA	NA	NA	Whole Blood	Negative	NA	NA	NA	NA	NA	NA	NA	NA	NA	NA	NA	NA	NA	NA	0.463623	NA	Negative	NA	NA	Still	Positive	Negative	Negative	Negative	Negative	NA	NA	NA	NA	NA	NA	NA	NA	NA	NA	NA	NA	NA
GSE22098	GSM549349	38	Female	Hispanic	OD	NA	NA	NA	NA	Whole Blood	Negative	NA	NA	NA	NA	NA	NA	NA	NA	NA	NA	NA	NA	NA	NA	0.763752	NA	Negative	NA	NA	Still	Positive	Negative	Negative	Negative	Negative	NA	NA	NA	NA	NA	NA	NA	NA	NA	NA	NA	NA	NA
GSE22098	GSM549350	44	Female	Caucasian	OD	NA	NA	NA	NA	Whole Blood	Negative	NA	NA	NA	NA	NA	NA	NA	NA	NA	NA	NA	NA	NA	NA	1.89947	NA	Negative	NA	NA	Still	Positive	Negative	Negative	Negative	Negative	NA	NA	NA	NA	NA	NA	NA	NA	NA	NA	NA	NA	NA
GSE22098	GSM549351	32	Female	Hispanic	OD	NA	NA	NA	NA	Whole Blood	Negative	NA	NA	NA	NA	NA	NA	NA	NA	NA	NA	NA	NA	NA	NA	2.35968	NA	Negative	NA	NA	Still	Positive	Negative	Negative	Negative	Negative	NA	NA	NA	NA	NA	NA	NA	NA	NA	NA	NA	NA	NA
GSE22098	GSM549352	26	Male	Caucasian	OD	NA	NA	NA	NA	Whole Blood	Negative	NA	NA	NA	NA	NA	NA	NA	NA	NA	NA	NA	NA	NA	NA	3.05027	NA	Negative	NA	NA	Still	Positive	Negative	Negative	Negative	Negative	NA	NA	NA	NA	NA	NA	NA	NA	NA	NA	NA	NA	NA
GSE22098	GSM549353	19	Male	Caucasian	OD	NA	NA	NA	NA	Whole Blood	Negative	NA	NA	NA	NA	NA	NA	NA	NA	NA	NA	NA	NA	NA	NA	0.337087	NA	Negative	NA	NA	Still	Positive	Negative	Negative	Negative	Negative	NA	NA	NA	NA	NA	NA	NA	NA	NA	NA	NA	NA	NA
GSE22098	GSM549354	48	Female	Hispanic	OD	NA	NA	NA	NA	Whole Blood	Negative	NA	NA	NA	NA	NA	NA	NA	NA	NA	NA	NA	NA	NA	NA	0.844244	NA	Negative	NA	NA	Still	Positive	Negative	Negative	Negative	Negative	NA	NA	NA	NA	NA	NA	NA	NA	NA	NA	NA	NA	NA
GSE22098	GSM549355	19	Male	Caucasian	OD	NA	NA	NA	NA	Whole Blood	Negative	NA	NA	NA	NA	NA	NA	NA	NA	NA	NA	NA	NA	NA	NA	0.787713	NA	Negative	NA	NA	Still	Positive	Negative	Negative	Negative	Negative	NA	NA	NA	NA	NA	NA	NA	NA	NA	NA	NA	NA	NA
GSE22098	GSM549356	59	Male	Caucasian	OD	NA	NA	NA	NA	Whole Blood	Negative	NA	NA	NA	NA	NA	NA	NA	NA	NA	NA	NA	NA	NA	NA	1.60081	NA	Negative	NA	NA	Still	Positive	Negative	Negative	Negative	Negative	NA	NA	NA	NA	NA	NA	NA	NA	NA	NA	NA	NA	NA
GSE22098	GSM549357	54	Male	Caucasian	OD	NA	NA	NA	NA	Whole Blood	Negative	NA	NA	NA	NA	NA	NA	NA	NA	NA	NA	NA	NA	NA	NA	1.94366	NA	Negative	NA	NA	Still	Positive	Negative	Negative	Negative	Negative	NA	NA	NA	NA	NA	NA	NA	NA	NA	NA	NA	NA	NA
GSE22098	GSM549358	36	Female	Caucasian	OD	NA	NA	NA	NA	Whole Blood	Negative	NA	NA	NA	NA	NA	NA	NA	NA	NA	NA	NA	NA	NA	NA	-0.961599	NA	Negative	NA	NA	ASLE	Negative	Positive	Negative	Negative	Negative	NA	NA	NA	NA	NA	NA	NA	NA	NA	NA	NA	NA	NA
GSE22098	GSM549359	36	Female	Caucasian	OD	NA	NA	NA	NA	Whole Blood	Negative	NA	NA	NA	NA	NA	NA	NA	NA	NA	NA	NA	NA	NA	NA	-0.265844	NA	Negative	NA	NA	ASLE	Negative	Positive	Negative	Negative	Negative	NA	NA	NA	NA	NA	NA	NA	NA	NA	NA	NA	NA	NA
GSE22098	GSM549360	79	Female	Caucasian	OD	NA	NA	NA	NA	Whole Blood	Negative	NA	NA	NA	NA	NA	NA	NA	NA	NA	NA	NA	NA	NA	NA	-0.793546	NA	Negative	NA	NA	ASLE	Negative	Positive	Negative	Negative	Negative	NA	NA	NA	NA	NA	NA	NA	NA	NA	NA	NA	NA	NA
GSE22098	GSM549361	29	Female	Asian	OD	NA	NA	NA	NA	Whole Blood	Negative	NA	NA	NA	NA	NA	NA	NA	NA	NA	NA	NA	NA	NA	NA	-1.02574	NA	Negative	NA	NA	ASLE	Negative	Positive	Negative	Negative	Negative	NA	NA	NA	NA	NA	NA	NA	NA	NA	NA	NA	NA	NA
GSE22098	GSM549362	30	Female	Caucasian	OD	NA	NA	NA	NA	Whole Blood	Negative	NA	NA	NA	NA	NA	NA	NA	NA	NA	NA	NA	NA	NA	NA	-0.322276	NA	Negative	NA	NA	ASLE	Negative	Positive	Negative	Negative	Negative	NA	NA	NA	NA	NA	NA	NA	NA	NA	NA	NA	NA	NA
GSE22098	GSM549363	45	Female	African American	OD	NA	NA	NA	NA	Whole Blood	Negative	NA	NA	NA	NA	NA	NA	NA	NA	NA	NA	NA	NA	NA	NA	-0.822262	NA	Negative	NA	NA	ASLE	Negative	Positive	Negative	Negative	Negative	NA	NA	NA	NA	NA	NA	NA	NA	NA	NA	NA	NA	NA
GSE22098	GSM549364	28	Male	Hispanic	OD	NA	NA	NA	NA	Whole Blood	Negative	NA	NA	NA	NA	NA	NA	NA	NA	NA	NA	NA	NA	NA	NA	0.139996	NA	Negative	NA	NA	ASLE	Negative	Positive	Negative	Negative	Negative	NA	NA	NA	NA	NA	NA	NA	NA	NA	NA	NA	NA	NA
GSE22098	GSM549365	53	Female	Caucasian	OD	NA	NA	NA	NA	Whole Blood	Negative	NA	NA	NA	NA	NA	NA	NA	NA	NA	NA	NA	NA	NA	NA	-0.841438	NA	Negative	NA	NA	ASLE	Negative	Positive	Negative	Negative	Negative	NA	NA	NA	NA	NA	NA	NA	NA	NA	NA	NA	NA	NA
GSE22098	GSM549366	28	Female	Caucasian	OD	NA	NA	NA	NA	Whole Blood	Negative	NA	NA	NA	NA	NA	NA	NA	NA	NA	NA	NA	NA	NA	NA	-0.537073	NA	Negative	NA	NA	ASLE	Negative	Positive	Negative	Negative	Negative	NA	NA	NA	NA	NA	NA	NA	NA	NA	NA	NA	NA	NA
GSE22098	GSM549367	28	Female	Asian	OD	NA	NA	NA	NA	Whole Blood	Negative	NA	NA	NA	NA	NA	NA	NA	NA	NA	NA	NA	NA	NA	NA	0.448996	NA	Negative	NA	NA	ASLE	Negative	Positive	Negative	Negative	Negative	NA	NA	NA	NA	NA	NA	NA	NA	NA	NA	NA	NA	NA
GSE22098	GSM549368	20	Female	African American	OD	NA	NA	NA	NA	Whole Blood	Negative	NA	NA	NA	NA	NA	NA	NA	NA	NA	NA	NA	NA	NA	NA	-0.247403	NA	Negative	NA	NA	ASLE	Negative	Positive	Negative	Negative	Negative	NA	NA	NA	NA	NA	NA	NA	NA	NA	NA	NA	NA	NA
GSE22098	GSM549369	38	Female	African American	OD	NA	NA	NA	NA	Whole Blood	Negative	NA	NA	NA	NA	NA	NA	NA	NA	NA	NA	NA	NA	NA	NA	-2.02788	NA	Negative	NA	NA	ASLE	Negative	Positive	Negative	Negative	Negative	NA	NA	NA	NA	NA	NA	NA	NA	NA	NA	NA	NA	NA
GSE22098	GSM549370	31	Male	Caucasian	OD	NA	NA	NA	NA	Whole Blood	Negative	NA	NA	NA	NA	NA	NA	NA	NA	NA	NA	NA	NA	NA	NA	-1.24534	NA	Negative	NA	NA	ASLE	Negative	Positive	Negative	Negative	Negative	NA	NA	NA	NA	NA	NA	NA	NA	NA	NA	NA	NA	NA
GSE22098	GSM549371	46	Female	Hispanic	OD	NA	NA	NA	NA	Whole Blood	Negative	NA	NA	NA	NA	NA	NA	NA	NA	NA	NA	NA	NA	NA	NA	-0.570204	NA	Negative	NA	NA	ASLE	Negative	Positive	Negative	Negative	Negative	NA	NA	NA	NA	NA	NA	NA	NA	NA	NA	NA	NA	NA
GSE22098	GSM549372	37	Female	Caucasian	OD	NA	NA	NA	NA	Whole Blood	Negative	NA	NA	NA	NA	NA	NA	NA	NA	NA	NA	NA	NA	NA	NA	-0.270793	NA	Negative	NA	NA	ASLE	Negative	Positive	Negative	Negative	Negative	NA	NA	NA	NA	NA	NA	NA	NA	NA	NA	NA	NA	NA
GSE22098	GSM549373	49	Female	Caucasian	OD	NA	NA	NA	NA	Whole Blood	Negative	NA	NA	NA	NA	NA	NA	NA	NA	NA	NA	NA	NA	NA	NA	-1.33737	NA	Negative	NA	NA	ASLE	Negative	Positive	Negative	Negative	Negative	NA	NA	NA	NA	NA	NA	NA	NA	NA	NA	NA	NA	NA
GSE22098	GSM549374	33	Female	Hispanic	OD	NA	NA	NA	NA	Whole Blood	Negative	NA	NA	NA	NA	NA	NA	NA	NA	NA	NA	NA	NA	NA	NA	-0.169187	NA	Negative	NA	NA	ASLE	Negative	Positive	Negative	Negative	Negative	NA	NA	NA	NA	NA	NA	NA	NA	NA	NA	NA	NA	NA
GSE22098	GSM549375	50	Female	Caucasian	OD	NA	NA	NA	NA	Whole Blood	Negative	NA	NA	NA	NA	NA	NA	NA	NA	NA	NA	NA	NA	NA	NA	0.0253065	NA	Negative	NA	NA	ASLE	Negative	Positive	Negative	Negative	Negative	NA	NA	NA	NA	NA	NA	NA	NA	NA	NA	NA	NA	NA
GSE22098	GSM549376	18	Female	Caucasian	OD	NA	NA	NA	NA	Whole Blood	Negative	NA	NA	NA	NA	NA	NA	NA	NA	NA	NA	NA	NA	NA	NA	-0.145346	NA	Negative	NA	NA	ASLE	Negative	Positive	Negative	Negative	Negative	NA	NA	NA	NA	NA	NA	NA	NA	NA	NA	NA	NA	NA
GSE22098	GSM549377	24	Female	Caucasian	OD	NA	NA	NA	NA	Whole Blood	Negative	NA	NA	NA	NA	NA	NA	NA	NA	NA	NA	NA	NA	NA	NA	-1.52862	NA	Negative	NA	NA	ASLE	Negative	Positive	Negative	Negative	Negative	NA	NA	NA	NA	NA	NA	NA	NA	NA	NA	NA	NA	NA
GSE22098	GSM549378	49	Female	African American	OD	NA	NA	NA	NA	Whole Blood	Negative	NA	NA	NA	NA	NA	NA	NA	NA	NA	NA	NA	NA	NA	NA	-0.402344	NA	Negative	NA	NA	ASLE	Negative	Positive	Negative	Negative	Negative	NA	NA	NA	NA	NA	NA	NA	NA	NA	NA	NA	NA	NA
GSE22098	GSM549379	52	Male	Caucasian	OD	NA	NA	NA	NA	Whole Blood	Negative	NA	NA	NA	NA	NA	NA	NA	NA	NA	NA	NA	NA	NA	NA	0.0603485	NA	Negative	NA	NA	ASLE	Negative	Positive	Negative	Negative	Negative	NA	NA	NA	NA	NA	NA	NA	NA	NA	NA	NA	NA	NA
GSE22098	GSM549380	50	Female	Caucasian	OD	NA	NA	NA	NA	Whole Blood	Negative	NA	NA	NA	NA	NA	NA	NA	NA	NA	NA	NA	NA	NA	NA	0.688373	NA	Negative	NA	NA	ASLE	Negative	Positive	Negative	Negative	Negative	NA	NA	NA	NA	NA	NA	NA	NA	NA	NA	NA	NA	NA
GSE22098	GSM549381	35	Female	African American	OD	NA	NA	NA	NA	Whole Blood	Negative	NA	NA	NA	NA	NA	NA	NA	NA	NA	NA	NA	NA	NA	NA	-0.0245088	NA	Negative	NA	NA	ASLE	Negative	Positive	Negative	Negative	Negative	NA	NA	NA	NA	NA	NA	NA	NA	NA	NA	NA	NA	NA
GSE22098	GSM549382	21	Male	Hispanic	OD	NA	NA	NA	NA	Whole Blood	Negative	NA	NA	NA	NA	NA	NA	NA	NA	NA	NA	NA	NA	NA	NA	-1.03781	NA	Negative	NA	NA	ASLE	Negative	Positive	Negative	Negative	Negative	NA	NA	NA	NA	NA	NA	NA	NA	NA	NA	NA	NA	NA
GSE22098	GSM549383	48	Female	Hispanic	OD	NA	NA	NA	NA	Whole Blood	Negative	NA	NA	NA	NA	NA	NA	NA	NA	NA	NA	NA	NA	NA	NA	-0.617946	NA	Negative	NA	NA	ASLE	Negative	Positive	Negative	Negative	Negative	NA	NA	NA	NA	NA	NA	NA	NA	NA	NA	NA	NA	NA
GSE22098	GSM549384	34	Female	African American	OD	NA	NA	NA	NA	Whole Blood	Negative	NA	NA	NA	NA	NA	NA	NA	NA	NA	NA	NA	NA	NA	NA	-0.354723	NA	Negative	NA	NA	ASLE	Negative	Positive	Negative	Negative	Negative	NA	NA	NA	NA	NA	NA	NA	NA	NA	NA	NA	NA	NA
GSE22098	GSM549385	51	Female	Caucasian	OD	NA	NA	NA	NA	Whole Blood	Negative	NA	NA	NA	NA	NA	NA	NA	NA	NA	NA	NA	NA	NA	NA	0.104898	NA	Negative	NA	NA	ASLE	Negative	Positive	Negative	Negative	Negative	NA	NA	NA	NA	NA	NA	NA	NA	NA	NA	NA	NA	NA
GSE22098	GSM549386	15	Male	Hispanic	OD	NA	NA	NA	NA	Whole Blood	Negative	NA	NA	NA	NA	NA	NA	NA	NA	NA	NA	NA	NA	NA	NA	0.0113875	NA	Negative	NA	NA	PSLE	Negative	Negative	Positive	Negative	Negative	NA	NA	NA	NA	NA	NA	NA	NA	NA	NA	NA	NA	NA
GSE22098	GSM549387	16	Female	Hispanic	OD	NA	NA	NA	NA	Whole Blood	Negative	NA	NA	NA	NA	NA	NA	NA	NA	NA	NA	NA	NA	NA	NA	1.02612	NA	Negative	NA	NA	PSLE	Negative	Negative	Positive	Negative	Negative	NA	NA	NA	NA	NA	NA	NA	NA	NA	NA	NA	NA	NA
GSE22098	GSM549388	13	Female	Caucasian	OD	NA	NA	NA	NA	Whole Blood	Negative	NA	NA	NA	NA	NA	NA	NA	NA	NA	NA	NA	NA	NA	NA	0.553752	NA	Negative	NA	NA	PSLE	Negative	Negative	Positive	Negative	Negative	NA	NA	NA	NA	NA	NA	NA	NA	NA	NA	NA	NA	NA
GSE22098	GSM549389	15	Female	Hispanic	OD	NA	NA	NA	NA	Whole Blood	Negative	NA	NA	NA	NA	NA	NA	NA	NA	NA	NA	NA	NA	NA	NA	-0.663534	NA	Negative	NA	NA	PSLE	Negative	Negative	Positive	Negative	Negative	NA	NA	NA	NA	NA	NA	NA	NA	NA	NA	NA	NA	NA
GSE22098	GSM549390	17	Female	Asian	OD	NA	NA	NA	NA	Whole Blood	Negative	NA	NA	NA	NA	NA	NA	NA	NA	NA	NA	NA	NA	NA	NA	1.65189	NA	Negative	NA	NA	PSLE	Negative	Negative	Positive	Negative	Negative	NA	NA	NA	NA	NA	NA	NA	NA	NA	NA	NA	NA	NA
GSE22098	GSM549391	16	Male	Caucasian	OD	NA	NA	NA	NA	Whole Blood	Negative	NA	NA	NA	NA	NA	NA	NA	NA	NA	NA	NA	NA	NA	NA	-0.846612	NA	Negative	NA	NA	PSLE	Negative	Negative	Positive	Negative	Negative	NA	NA	NA	NA	NA	NA	NA	NA	NA	NA	NA	NA	NA
GSE22098	GSM549392	14	Female	Hispanic	OD	NA	NA	NA	NA	Whole Blood	Negative	NA	NA	NA	NA	NA	NA	NA	NA	NA	NA	NA	NA	NA	NA	-0.94246	NA	Negative	NA	NA	PSLE	Negative	Negative	Positive	Negative	Negative	NA	NA	NA	NA	NA	NA	NA	NA	NA	NA	NA	NA	NA
GSE22098	GSM549393	17	Female	Hispanic	OD	NA	NA	NA	NA	Whole Blood	Negative	NA	NA	NA	NA	NA	NA	NA	NA	NA	NA	NA	NA	NA	NA	0.677054	NA	Negative	NA	NA	PSLE	Negative	Negative	Positive	Negative	Negative	NA	NA	NA	NA	NA	NA	NA	NA	NA	NA	NA	NA	NA
GSE22098	GSM549394	17	Female	Hispanic	OD	NA	NA	NA	NA	Whole Blood	Negative	NA	NA	NA	NA	NA	NA	NA	NA	NA	NA	NA	NA	NA	NA	0.528368	NA	Negative	NA	NA	PSLE	Negative	Negative	Positive	Negative	Negative	NA	NA	NA	NA	NA	NA	NA	NA	NA	NA	NA	NA	NA
GSE22098	GSM549395	17	Female	African American	OD	NA	NA	NA	NA	Whole Blood	Negative	NA	NA	NA	NA	NA	NA	NA	NA	NA	NA	NA	NA	NA	NA	0.921038	NA	Negative	NA	NA	PSLE	Negative	Negative	Positive	Negative	Negative	NA	NA	NA	NA	NA	NA	NA	NA	NA	NA	NA	NA	NA
GSE22098	GSM549396	16	Female	Caucasian	OD	NA	NA	NA	NA	Whole Blood	Negative	NA	NA	NA	NA	NA	NA	NA	NA	NA	NA	NA	NA	NA	NA	0.706561	NA	Negative	NA	NA	PSLE	Negative	Negative	Positive	Negative	Negative	NA	NA	NA	NA	NA	NA	NA	NA	NA	NA	NA	NA	NA
GSE22098	GSM549397	15	Female	African American	OD	NA	NA	NA	NA	Whole Blood	Negative	NA	NA	NA	NA	NA	NA	NA	NA	NA	NA	NA	NA	NA	NA	-0.504643	NA	Negative	NA	NA	PSLE	Negative	Negative	Positive	Negative	Negative	NA	NA	NA	NA	NA	NA	NA	NA	NA	NA	NA	NA	NA
GSE22098	GSM549398	17	Female	Hispanic	OD	NA	NA	NA	NA	Whole Blood	Negative	NA	NA	NA	NA	NA	NA	NA	NA	NA	NA	NA	NA	NA	NA	0.634013	NA	Negative	NA	NA	PSLE	Negative	Negative	Positive	Negative	Negative	NA	NA	NA	NA	NA	NA	NA	NA	NA	NA	NA	NA	NA
GSE22098	GSM549399	18	Female	Hispanic	OD	NA	NA	NA	NA	Whole Blood	Negative	NA	NA	NA	NA	NA	NA	NA	NA	NA	NA	NA	NA	NA	NA	1.37455	NA	Negative	NA	NA	PSLE	Negative	Negative	Positive	Negative	Negative	NA	NA	NA	NA	NA	NA	NA	NA	NA	NA	NA	NA	NA
GSE22098	GSM549400	14	Male	Hispanic	OD	NA	NA	NA	NA	Whole Blood	Negative	NA	NA	NA	NA	NA	NA	NA	NA	NA	NA	NA	NA	NA	NA	-1.32095	NA	Negative	NA	NA	PSLE	Negative	Negative	Positive	Negative	Negative	NA	NA	NA	NA	NA	NA	NA	NA	NA	NA	NA	NA	NA
GSE22098	GSM549401	17	Female	Hispanic	OD	NA	NA	NA	NA	Whole Blood	Negative	NA	NA	NA	NA	NA	NA	NA	NA	NA	NA	NA	NA	NA	NA	-0.535082	NA	Negative	NA	NA	PSLE	Negative	Negative	Positive	Negative	Negative	NA	NA	NA	NA	NA	NA	NA	NA	NA	NA	NA	NA	NA
GSE22098	GSM549402	16	Female	Hispanic	OD	NA	NA	NA	NA	Whole Blood	Negative	NA	NA	NA	NA	NA	NA	NA	NA	NA	NA	NA	NA	NA	NA	-0.0280388	NA	Negative	NA	NA	PSLE	Negative	Negative	Positive	Negative	Negative	NA	NA	NA	NA	NA	NA	NA	NA	NA	NA	NA	NA	NA
GSE22098	GSM549403	17	Female	Hispanic	OD	NA	NA	NA	NA	Whole Blood	Negative	NA	NA	NA	NA	NA	NA	NA	NA	NA	NA	NA	NA	NA	NA	-0.0848916	NA	Negative	NA	NA	PSLE	Negative	Negative	Positive	Negative	Negative	NA	NA	NA	NA	NA	NA	NA	NA	NA	NA	NA	NA	NA
GSE22098	GSM549404	14	Male	Hispanic	OD	NA	NA	NA	NA	Whole Blood	Negative	NA	NA	NA	NA	NA	NA	NA	NA	NA	NA	NA	NA	NA	NA	0.476178	NA	Negative	NA	NA	PSLE	Negative	Negative	Positive	Negative	Negative	NA	NA	NA	NA	NA	NA	NA	NA	NA	NA	NA	NA	NA
GSE22098	GSM549405	16	Female	African American	OD	NA	NA	NA	NA	Whole Blood	Negative	NA	NA	NA	NA	NA	NA	NA	NA	NA	NA	NA	NA	NA	NA	0.0928674	NA	Negative	NA	NA	PSLE	Negative	Negative	Positive	Negative	Negative	NA	NA	NA	NA	NA	NA	NA	NA	NA	NA	NA	NA	NA
GSE22098	GSM549406	15	Female	African American	OD	NA	NA	NA	NA	Whole Blood	Negative	NA	NA	NA	NA	NA	NA	NA	NA	NA	NA	NA	NA	NA	NA	0.0942036	NA	Negative	NA	NA	PSLE	Negative	Negative	Positive	Negative	Negative	NA	NA	NA	NA	NA	NA	NA	NA	NA	NA	NA	NA	NA
GSE22098	GSM549407	14	Female	Hispanic	OD	NA	NA	NA	NA	Whole Blood	Negative	NA	NA	NA	NA	NA	NA	NA	NA	NA	NA	NA	NA	NA	NA	0.991832	NA	Negative	NA	NA	PSLE	Negative	Negative	Positive	Negative	Negative	NA	NA	NA	NA	NA	NA	NA	NA	NA	NA	NA	NA	NA
GSE22098	GSM549408	16	Female	Hispanic	OD	NA	NA	NA	NA	Whole Blood	Negative	NA	NA	NA	NA	NA	NA	NA	NA	NA	NA	NA	NA	NA	NA	0.810181	NA	Negative	NA	NA	PSLE	Negative	Negative	Positive	Negative	Negative	NA	NA	NA	NA	NA	NA	NA	NA	NA	NA	NA	NA	NA
GSE22098	GSM549409	16	Female	Caucasian	OD	NA	NA	NA	NA	Whole Blood	Negative	NA	NA	NA	NA	NA	NA	NA	NA	NA	NA	NA	NA	NA	NA	-0.169101	NA	Negative	NA	NA	PSLE	Negative	Negative	Positive	Negative	Negative	NA	NA	NA	NA	NA	NA	NA	NA	NA	NA	NA	NA	NA
GSE22098	GSM549410	17	Female	African American	OD	NA	NA	NA	NA	Whole Blood	Negative	NA	NA	NA	NA	NA	NA	NA	NA	NA	NA	NA	NA	NA	NA	0.812317	NA	Negative	NA	NA	PSLE	Negative	Negative	Positive	Negative	Negative	NA	NA	NA	NA	NA	NA	NA	NA	NA	NA	NA	NA	NA
GSE22098	GSM549411	17	Male	Hispanic	OD	NA	NA	NA	NA	Whole Blood	Negative	NA	NA	NA	NA	NA	NA	NA	NA	NA	NA	NA	NA	NA	NA	-0.126131	NA	Negative	NA	NA	PSLE	Negative	Negative	Positive	Negative	Negative	NA	NA	NA	NA	NA	NA	NA	NA	NA	NA	NA	NA	NA
GSE22098	GSM549412	17	Female	Hispanic	OD	NA	NA	NA	NA	Whole Blood	Negative	NA	NA	NA	NA	NA	NA	NA	NA	NA	NA	NA	NA	NA	NA	-0.858091	NA	Negative	NA	NA	PSLE	Negative	Negative	Positive	Negative	Negative	NA	NA	NA	NA	NA	NA	NA	NA	NA	NA	NA	NA	NA
GSE22098	GSM549413	17	Female	Hispanic	OD	NA	NA	NA	NA	Whole Blood	Negative	NA	NA	NA	NA	NA	NA	NA	NA	NA	NA	NA	NA	NA	NA	0.142757	NA	Negative	NA	NA	PSLE	Negative	Negative	Positive	Negative	Negative	NA	NA	NA	NA	NA	NA	NA	NA	NA	NA	NA	NA	NA
GSE22098	GSM549414	16	Female	African American	OD	NA	NA	NA	NA	Whole Blood	Negative	NA	NA	NA	NA	NA	NA	NA	NA	NA	NA	NA	NA	NA	NA	-0.416569	NA	Negative	NA	NA	PSLE	Negative	Negative	Positive	Negative	Negative	NA	NA	NA	NA	NA	NA	NA	NA	NA	NA	NA	NA	NA
GSE22098	GSM549415	16	Female	African American	OD	NA	NA	NA	NA	Whole Blood	Negative	NA	NA	NA	NA	NA	NA	NA	NA	NA	NA	NA	NA	NA	NA	-0.142711	NA	Negative	NA	NA	PSLE	Negative	Negative	Positive	Negative	Negative	NA	NA	NA	NA	NA	NA	NA	NA	NA	NA	NA	NA	NA
GSE22098	GSM549416	13	Male	Hispanic	OD	NA	NA	NA	NA	Whole Blood	Negative	NA	NA	NA	NA	NA	NA	NA	NA	NA	NA	NA	NA	NA	NA	-0.563595	NA	Negative	NA	NA	PSLE	Negative	Negative	Positive	Negative	Negative	NA	NA	NA	NA	NA	NA	NA	NA	NA	NA	NA	NA	NA
GSE22098	GSM549417	15	Female	Hispanic	OD	NA	NA	NA	NA	Whole Blood	Negative	NA	NA	NA	NA	NA	NA	NA	NA	NA	NA	NA	NA	NA	NA	1.00457	NA	Negative	NA	NA	PSLE	Negative	Negative	Positive	Negative	Negative	NA	NA	NA	NA	NA	NA	NA	NA	NA	NA	NA	NA	NA
GSE22098	GSM549418	13	Female	Caucasian	OD	NA	NA	NA	NA	Whole Blood	Negative	NA	NA	NA	NA	NA	NA	NA	NA	NA	NA	NA	NA	NA	NA	-0.727323	NA	Negative	NA	NA	PSLE	Negative	Negative	Positive	Negative	Negative	NA	NA	NA	NA	NA	NA	NA	NA	NA	NA	NA	NA	NA
GSE22098	GSM549419	29	Female	Caucasian	OD	NA	NA	NA	NA	Whole Blood	Negative	NA	NA	NA	NA	NA	NA	NA	NA	NA	NA	NA	NA	NA	NA	-0.382643	NA	Negative	NA	NA	Still	Positive	Negative	Negative	Negative	Negative	NA	NA	NA	NA	NA	NA	NA	NA	NA	NA	NA	NA	NA
GSE22098	GSM549420	25	Female	Caucasian	OD	NA	NA	NA	NA	Whole Blood	Negative	NA	NA	NA	NA	NA	NA	NA	NA	NA	NA	NA	NA	NA	NA	0.810105	NA	Negative	NA	NA	Still	Positive	Negative	Negative	Negative	Negative	NA	NA	NA	NA	NA	NA	NA	NA	NA	NA	NA	NA	NA
GSE22098	GSM549421	6	Female	Hispanic	OD	NA	NA	NA	NA	Whole Blood	Negative	NA	NA	NA	NA	NA	NA	NA	NA	NA	NA	NA	NA	NA	NA	-1.17271	NA	Negative	NA	NA	Staph	Negative	Negative	Negative	Positive	Negative	NA	NA	NA	NA	NA	NA	NA	NA	NA	NA	NA	NA	NA
GSE22098	GSM549422	9	Male	Caucasian	OD	NA	NA	NA	NA	Whole Blood	Negative	NA	NA	NA	NA	NA	NA	NA	NA	NA	NA	NA	NA	NA	NA	0.261698	NA	Negative	NA	NA	Staph	Negative	Negative	Negative	Positive	Negative	NA	NA	NA	NA	NA	NA	NA	NA	NA	NA	NA	NA	NA
GSE22098	GSM549423	6	Female	African American	OD	NA	NA	NA	NA	Whole Blood	Negative	NA	NA	NA	NA	NA	NA	NA	NA	NA	NA	NA	NA	NA	NA	-2.00626	NA	Negative	NA	NA	Staph	Negative	Negative	Negative	Positive	Negative	NA	NA	NA	NA	NA	NA	NA	NA	NA	NA	NA	NA	NA
GSE22098	GSM549424	11	Male	Caucasian	OD	NA	NA	NA	NA	Whole Blood	Negative	NA	NA	NA	NA	NA	NA	NA	NA	NA	NA	NA	NA	NA	NA	0.163899	NA	Negative	NA	NA	Staph	Negative	Negative	Negative	Positive	Negative	NA	NA	NA	NA	NA	NA	NA	NA	NA	NA	NA	NA	NA
GSE22098	GSM549425	15	Male	African American	OD	NA	NA	NA	NA	Whole Blood	Negative	NA	NA	NA	NA	NA	NA	NA	NA	NA	NA	NA	NA	NA	NA	1.78914	NA	Negative	NA	NA	Staph	Negative	Negative	Negative	Positive	Negative	NA	NA	NA	NA	NA	NA	NA	NA	NA	NA	NA	NA	NA
GSE22098	GSM549426	5	Male	African American	OD	NA	NA	NA	NA	Whole Blood	Negative	NA	NA	NA	NA	NA	NA	NA	NA	NA	NA	NA	NA	NA	NA	-0.106157	NA	Negative	NA	NA	Staph	Negative	Negative	Negative	Positive	Negative	NA	NA	NA	NA	NA	NA	NA	NA	NA	NA	NA	NA	NA
GSE22098	GSM549427	13	Male	Caucasian	OD	NA	NA	NA	NA	Whole Blood	Negative	NA	NA	NA	NA	NA	NA	NA	NA	NA	NA	NA	NA	NA	NA	-0.169679	NA	Negative	NA	NA	Staph	Negative	Negative	Negative	Positive	Negative	NA	NA	NA	NA	NA	NA	NA	NA	NA	NA	NA	NA	NA
GSE22098	GSM549428	3	Male	Hispanic	OD	NA	NA	NA	NA	Whole Blood	Negative	NA	NA	NA	NA	NA	NA	NA	NA	NA	NA	NA	NA	NA	NA	1.73231	NA	Negative	NA	NA	Staph	Negative	Negative	Negative	Positive	Negative	NA	NA	NA	NA	NA	NA	NA	NA	NA	NA	NA	NA	NA
GSE22098	GSM549429	11	Female	Caucasian	OD	NA	NA	NA	NA	Whole Blood	Negative	NA	NA	NA	NA	NA	NA	NA	NA	NA	NA	NA	NA	NA	NA	-1.15476	NA	Negative	NA	NA	Staph	Negative	Negative	Negative	Positive	Negative	NA	NA	NA	NA	NA	NA	NA	NA	NA	NA	NA	NA	NA
GSE22098	GSM549430	17	Male	Hispanic	OD	NA	NA	NA	NA	Whole Blood	Negative	NA	NA	NA	NA	NA	NA	NA	NA	NA	NA	NA	NA	NA	NA	-0.317002	NA	Negative	NA	NA	Staph	Negative	Negative	Negative	Positive	Negative	NA	NA	NA	NA	NA	NA	NA	NA	NA	NA	NA	NA	NA
GSE22098	GSM549431	4	Female	Hispanic	OD	NA	NA	NA	NA	Whole Blood	Negative	NA	NA	NA	NA	NA	NA	NA	NA	NA	NA	NA	NA	NA	NA	-0.555442	NA	Negative	NA	NA	Staph	Negative	Negative	Negative	Positive	Negative	NA	NA	NA	NA	NA	NA	NA	NA	NA	NA	NA	NA	NA
GSE22098	GSM549432	5	Male	African American	OD	NA	NA	NA	NA	Whole Blood	Negative	NA	NA	NA	NA	NA	NA	NA	NA	NA	NA	NA	NA	NA	NA	0.673669	NA	Negative	NA	NA	Staph	Negative	Negative	Negative	Positive	Negative	NA	NA	NA	NA	NA	NA	NA	NA	NA	NA	NA	NA	NA
GSE22098	GSM549433	1	Female	Hispanic	OD	NA	NA	NA	NA	Whole Blood	Negative	NA	NA	NA	NA	NA	NA	NA	NA	NA	NA	NA	NA	NA	NA	-1.48054	NA	Negative	NA	NA	Staph	Negative	Negative	Negative	Positive	Negative	NA	NA	NA	NA	NA	NA	NA	NA	NA	NA	NA	NA	NA
GSE22098	GSM549434	9	Male	African American	OD	NA	NA	NA	NA	Whole Blood	Negative	NA	NA	NA	NA	NA	NA	NA	NA	NA	NA	NA	NA	NA	NA	0.345862	NA	Negative	NA	NA	Staph	Negative	Negative	Negative	Positive	Negative	NA	NA	NA	NA	NA	NA	NA	NA	NA	NA	NA	NA	NA
GSE22098	GSM549435	1	Female	African American	OD	NA	NA	NA	NA	Whole Blood	Negative	NA	NA	NA	NA	NA	NA	NA	NA	NA	NA	NA	NA	NA	NA	-4.09093	NA	Negative	NA	NA	Strep	Negative	Negative	Negative	Negative	Positive	NA	NA	NA	NA	NA	NA	NA	NA	NA	NA	NA	NA	NA
GSE22098	GSM549436	5	Female	Hispanic	OD	NA	NA	NA	NA	Whole Blood	Negative	NA	NA	NA	NA	NA	NA	NA	NA	NA	NA	NA	NA	NA	NA	1.06507	NA	Negative	NA	NA	Strep	Negative	Negative	Negative	Negative	Positive	NA	NA	NA	NA	NA	NA	NA	NA	NA	NA	NA	NA	NA
GSE22098	GSM549437	6	Female	Asian	OD	NA	NA	NA	NA	Whole Blood	Negative	NA	NA	NA	NA	NA	NA	NA	NA	NA	NA	NA	NA	NA	NA	-0.285025	NA	Negative	NA	NA	Strep	Negative	Negative	Negative	Negative	Positive	NA	NA	NA	NA	NA	NA	NA	NA	NA	NA	NA	NA	NA
GSE22098	GSM549438	14	Male	African American	OD	NA	NA	NA	NA	Whole Blood	Negative	NA	NA	NA	NA	NA	NA	NA	NA	NA	NA	NA	NA	NA	NA	-0.563215	NA	Negative	NA	NA	Strep	Negative	Negative	Negative	Negative	Positive	NA	NA	NA	NA	NA	NA	NA	NA	NA	NA	NA	NA	NA
GSE22098	GSM549439	5	Female	Hispanic	OD	NA	NA	NA	NA	Whole Blood	Negative	NA	NA	NA	NA	NA	NA	NA	NA	NA	NA	NA	NA	NA	NA	-0.363792	NA	Negative	NA	NA	Strep	Negative	Negative	Negative	Negative	Positive	NA	NA	NA	NA	NA	NA	NA	NA	NA	NA	NA	NA	NA
GSE22098	GSM549440	7	Male	Caucasian	OD	NA	NA	NA	NA	Whole Blood	Negative	NA	NA	NA	NA	NA	NA	NA	NA	NA	NA	NA	NA	NA	NA	-0.0321409	NA	Negative	NA	NA	Strep	Negative	Negative	Negative	Negative	Positive	NA	NA	NA	NA	NA	NA	NA	NA	NA	NA	NA	NA	NA
GSE22098	GSM549441	1	Male	Hispanic	OD	NA	NA	NA	NA	Whole Blood	Negative	NA	NA	NA	NA	NA	NA	NA	NA	NA	NA	NA	NA	NA	NA	-2.329	NA	Negative	NA	NA	Strep	Negative	Negative	Negative	Negative	Positive	NA	NA	NA	NA	NA	NA	NA	NA	NA	NA	NA	NA	NA
GSE22098	GSM549442	6	Male	Hispanic	OD	NA	NA	NA	NA	Whole Blood	Negative	NA	NA	NA	NA	NA	NA	NA	NA	NA	NA	NA	NA	NA	NA	0.104827	NA	Negative	NA	NA	Strep	Negative	Negative	Negative	Negative	Positive	NA	NA	NA	NA	NA	NA	NA	NA	NA	NA	NA	NA	NA
GSE22098	GSM549443	5	Female	Caucasian	OD	NA	NA	NA	NA	Whole Blood	Negative	NA	NA	NA	NA	NA	NA	NA	NA	NA	NA	NA	NA	NA	NA	-0.322788	NA	Negative	NA	NA	Strep	Negative	Negative	Negative	Negative	Positive	NA	NA	NA	NA	NA	NA	NA	NA	NA	NA	NA	NA	NA
GSE22098	GSM549444	16	Male	Caucasian	OD	NA	NA	NA	NA	Whole Blood	Negative	NA	NA	NA	NA	NA	NA	NA	NA	NA	NA	NA	NA	NA	NA	0.660705	NA	Negative	NA	NA	Strep	Negative	Negative	Negative	Negative	Positive	NA	NA	NA	NA	NA	NA	NA	NA	NA	NA	NA	NA	NA
GSE22098	GSM549445	1	Female	Hispanic	OD	NA	NA	NA	NA	Whole Blood	Negative	NA	NA	NA	NA	NA	NA	NA	NA	NA	NA	NA	NA	NA	NA	-1.60818	NA	Negative	NA	NA	Strep	Negative	Negative	Negative	Negative	Positive	NA	NA	NA	NA	NA	NA	NA	NA	NA	NA	NA	NA	NA
GSE22098	GSM549446	1	Male	Caucasian	OD	NA	NA	NA	NA	Whole Blood	Negative	NA	NA	NA	NA	NA	NA	NA	NA	NA	NA	NA	NA	NA	NA	-0.948207	NA	Negative	NA	NA	Strep	Negative	Negative	Negative	Negative	Positive	NA	NA	NA	NA	NA	NA	NA	NA	NA	NA	NA	NA	NA
GSE22098	GSM549447	10	Female	Caucasian	OD	NA	NA	NA	NA	Whole Blood	Negative	NA	NA	NA	NA	NA	NA	NA	NA	NA	NA	NA	NA	NA	NA	0.0505789	NA	Negative	NA	NA	Staph	Negative	Negative	Negative	Positive	Negative	NA	NA	NA	NA	NA	NA	NA	NA	NA	NA	NA	NA	NA
GSE22098	GSM549448	3	Male	African American	OD	NA	NA	NA	NA	Whole Blood	Negative	NA	NA	NA	NA	NA	NA	NA	NA	NA	NA	NA	NA	NA	NA	-0.806158	NA	Negative	NA	NA	Staph	Negative	Negative	Negative	Positive	Negative	NA	NA	NA	NA	NA	NA	NA	NA	NA	NA	NA	NA	NA
GSE22098	GSM549449	2	Female	Hispanic	OD	NA	NA	NA	NA	Whole Blood	Negative	NA	NA	NA	NA	NA	NA	NA	NA	NA	NA	NA	NA	NA	NA	-0.908281	NA	Negative	NA	NA	Staph	Negative	Negative	Negative	Positive	Negative	NA	NA	NA	NA	NA	NA	NA	NA	NA	NA	NA	NA	NA
GSE22098	GSM549450	11	Male	African American	OD	NA	NA	NA	NA	Whole Blood	Negative	NA	NA	NA	NA	NA	NA	NA	NA	NA	NA	NA	NA	NA	NA	-0.480375	NA	Negative	NA	NA	Staph	Negative	Negative	Negative	Positive	Negative	NA	NA	NA	NA	NA	NA	NA	NA	NA	NA	NA	NA	NA
GSE22098	GSM549451	10	Female	Hispanic	OD	NA	NA	NA	NA	Whole Blood	Negative	NA	NA	NA	NA	NA	NA	NA	NA	NA	NA	NA	NA	NA	NA	0.129635	NA	Negative	NA	NA	Staph	Negative	Negative	Negative	Positive	Negative	NA	NA	NA	NA	NA	NA	NA	NA	NA	NA	NA	NA	NA
GSE22098	GSM549452	1	Male	African American	OD	NA	NA	NA	NA	Whole Blood	Negative	NA	NA	NA	NA	NA	NA	NA	NA	NA	NA	NA	NA	NA	NA	-1.26106	NA	Negative	NA	NA	Staph	Negative	Negative	Negative	Positive	Negative	NA	NA	NA	NA	NA	NA	NA	NA	NA	NA	NA	NA	NA
GSE22098	GSM549453	8	Female	Hispanic	OD	NA	NA	NA	NA	Whole Blood	Negative	NA	NA	NA	NA	NA	NA	NA	NA	NA	NA	NA	NA	NA	NA	0.113673	NA	Negative	NA	NA	Staph	Negative	Negative	Negative	Positive	Negative	NA	NA	NA	NA	NA	NA	NA	NA	NA	NA	NA	NA	NA
GSE22098	GSM549454	2	Male	African American	OD	NA	NA	NA	NA	Whole Blood	Negative	NA	NA	NA	NA	NA	NA	NA	NA	NA	NA	NA	NA	NA	NA	-2.12878	NA	Negative	NA	NA	Staph	Negative	Negative	Negative	Positive	Negative	NA	NA	NA	NA	NA	NA	NA	NA	NA	NA	NA	NA	NA
GSE22098	GSM549455	8	Female	African American	OD	NA	NA	NA	NA	Whole Blood	Negative	NA	NA	NA	NA	NA	NA	NA	NA	NA	NA	NA	NA	NA	NA	-0.42588	NA	Negative	NA	NA	Staph	Negative	Negative	Negative	Positive	Negative	NA	NA	NA	NA	NA	NA	NA	NA	NA	NA	NA	NA	NA
GSE22098	GSM549456	0	Female	African American	OD	NA	NA	NA	NA	Whole Blood	Negative	NA	NA	NA	NA	NA	NA	NA	NA	NA	NA	NA	NA	NA	NA	-0.0797377	NA	Negative	NA	NA	Staph	Negative	Negative	Negative	Positive	Negative	NA	NA	NA	NA	NA	NA	NA	NA	NA	NA	NA	NA	NA
GSE22098	GSM549457	1	Female	Caucasian	OD	NA	NA	NA	NA	Whole Blood	Negative	NA	NA	NA	NA	NA	NA	NA	NA	NA	NA	NA	NA	NA	NA	0.662103	NA	Negative	NA	NA	Staph	Negative	Negative	Negative	Positive	Negative	NA	NA	NA	NA	NA	NA	NA	NA	NA	NA	NA	NA	NA
GSE22098	GSM549458	7	Female	African American	OD	NA	NA	NA	NA	Whole Blood	Negative	NA	NA	NA	NA	NA	NA	NA	NA	NA	NA	NA	NA	NA	NA	1.53914	NA	Negative	NA	NA	Staph	Negative	Negative	Negative	Positive	Negative	NA	NA	NA	NA	NA	NA	NA	NA	NA	NA	NA	NA	NA
GSE22098	GSM549459	9	Male	African American	OD	NA	NA	NA	NA	Whole Blood	Negative	NA	NA	NA	NA	NA	NA	NA	NA	NA	NA	NA	NA	NA	NA	0.372703	NA	Negative	NA	NA	Staph	Negative	Negative	Negative	Positive	Negative	NA	NA	NA	NA	NA	NA	NA	NA	NA	NA	NA	NA	NA
GSE22098	GSM549460	11	Male	Hispanic	OD	NA	NA	NA	NA	Whole Blood	Negative	NA	NA	NA	NA	NA	NA	NA	NA	NA	NA	NA	NA	NA	NA	0.644042	NA	Negative	NA	NA	Staph	Negative	Negative	Negative	Positive	Negative	NA	NA	NA	NA	NA	NA	NA	NA	NA	NA	NA	NA	NA
GSE22098	GSM549461	1	Male	African American	OD	NA	NA	NA	NA	Whole Blood	Negative	NA	NA	NA	NA	NA	NA	NA	NA	NA	NA	NA	NA	NA	NA	-1.32805	NA	Negative	NA	NA	Staph	Negative	Negative	Negative	Positive	Negative	NA	NA	NA	NA	NA	NA	NA	NA	NA	NA	NA	NA	NA
GSE22098	GSM549462	6	Female	Hispanic	OD	NA	NA	NA	NA	Whole Blood	Negative	NA	NA	NA	NA	NA	NA	NA	NA	NA	NA	NA	NA	NA	NA	-1.19241	NA	Negative	NA	NA	Staph	Negative	Negative	Negative	Positive	Negative	NA	NA	NA	NA	NA	NA	NA	NA	NA	NA	NA	NA	NA
GSE22098	GSM549463	2	Female	African American	OD	NA	NA	NA	NA	Whole Blood	Negative	NA	NA	NA	NA	NA	NA	NA	NA	NA	NA	NA	NA	NA	NA	-2.59212	NA	Negative	NA	NA	Staph	Negative	Negative	Negative	Positive	Negative	NA	NA	NA	NA	NA	NA	NA	NA	NA	NA	NA	NA	NA
GSE22098	GSM549464	10	Female	African American	OD	NA	NA	NA	NA	Whole Blood	Negative	NA	NA	NA	NA	NA	NA	NA	NA	NA	NA	NA	NA	NA	NA	0.398893	NA	Negative	NA	NA	Staph	Negative	Negative	Negative	Positive	Negative	NA	NA	NA	NA	NA	NA	NA	NA	NA	NA	NA	NA	NA
GSE22098	GSM549465	11	Male	African American	OD	NA	NA	NA	NA	Whole Blood	Negative	NA	NA	NA	NA	NA	NA	NA	NA	NA	NA	NA	NA	NA	NA	0.515707	NA	Negative	NA	NA	Staph	Negative	Negative	Negative	Positive	Negative	NA	NA	NA	NA	NA	NA	NA	NA	NA	NA	NA	NA	NA
GSE22098	GSM549466	12	Male	Caucasian	OD	NA	NA	NA	NA	Whole Blood	Negative	NA	NA	NA	NA	NA	NA	NA	NA	NA	NA	NA	NA	NA	NA	0.462614	NA	Negative	NA	NA	Staph	Negative	Negative	Negative	Positive	Negative	NA	NA	NA	NA	NA	NA	NA	NA	NA	NA	NA	NA	NA
GSE22098	GSM549467	5	Female	African American	OD	NA	NA	NA	NA	Whole Blood	Negative	NA	NA	NA	NA	NA	NA	NA	NA	NA	NA	NA	NA	NA	NA	-1.76087	NA	Negative	NA	NA	Staph	Negative	Negative	Negative	Positive	Negative	NA	NA	NA	NA	NA	NA	NA	NA	NA	NA	NA	NA	NA
GSE22098	GSM549468	1	Female	Hispanic	OD	NA	NA	NA	NA	Whole Blood	Negative	NA	NA	NA	NA	NA	NA	NA	NA	NA	NA	NA	NA	NA	NA	0.699836	NA	Negative	NA	NA	Staph	Negative	Negative	Negative	Positive	Negative	NA	NA	NA	NA	NA	NA	NA	NA	NA	NA	NA	NA	NA
GSE22098	GSM549469	15	Male	Caucasian	OD	NA	NA	NA	NA	Whole Blood	Negative	NA	NA	NA	NA	NA	NA	NA	NA	NA	NA	NA	NA	NA	NA	-1.00678	NA	Negative	NA	NA	Staph	Negative	Negative	Negative	Positive	Negative	NA	NA	NA	NA	NA	NA	NA	NA	NA	NA	NA	NA	NA
GSE22098	GSM549470	8	Female	Hispanic	OD	NA	NA	NA	NA	Whole Blood	Negative	NA	NA	NA	NA	NA	NA	NA	NA	NA	NA	NA	NA	NA	NA	-0.351695	NA	Negative	NA	NA	Staph	Negative	Negative	Negative	Positive	Negative	NA	NA	NA	NA	NA	NA	NA	NA	NA	NA	NA	NA	NA
GSE22098	GSM549471	12	Female	African American	OD	NA	NA	NA	NA	Whole Blood	Negative	NA	NA	NA	NA	NA	NA	NA	NA	NA	NA	NA	NA	NA	NA	-0.273881	NA	Negative	NA	NA	Staph	Negative	Negative	Negative	Positive	Negative	NA	NA	NA	NA	NA	NA	NA	NA	NA	NA	NA	NA	NA
GSE22098	GSM549472	13	Male	Caucasian	OD	NA	NA	NA	NA	Whole Blood	Negative	NA	NA	NA	NA	NA	NA	NA	NA	NA	NA	NA	NA	NA	NA	-0.820671	NA	Negative	NA	NA	Staph	Negative	Negative	Negative	Positive	Negative	NA	NA	NA	NA	NA	NA	NA	NA	NA	NA	NA	NA	NA
GSE22098	GSM549473	58	Female	Caucasian	OD	NA	NA	NA	NA	Whole Blood	Negative	NA	NA	NA	NA	NA	NA	NA	NA	NA	NA	NA	NA	NA	NA	0.448797	NA	Negative	NA	NA	Still	Positive	Negative	Negative	Negative	Negative	NA	NA	NA	NA	NA	NA	NA	NA	NA	NA	NA	NA	NA
GSE22098	GSM549474	35	Female	Asian	OD	NA	NA	NA	NA	Whole Blood	Negative	NA	NA	NA	NA	NA	NA	NA	NA	NA	NA	NA	NA	NA	NA	1.78772	NA	Negative	NA	NA	Still	Positive	Negative	Negative	Negative	Negative	NA	NA	NA	NA	NA	NA	NA	NA	NA	NA	NA	NA	NA
GSE22098	GSM549475	12	Female	Hispanic	OD	NA	NA	NA	NA	Whole Blood	Negative	NA	NA	NA	NA	NA	NA	NA	NA	NA	NA	NA	NA	NA	NA	0.344103	NA	Negative	NA	NA	PSLE	Negative	Negative	Positive	Negative	Negative	NA	NA	NA	NA	NA	NA	NA	NA	NA	NA	NA	NA	NA
GSE22098	GSM549476	18	Female	Caucasian	OD	NA	NA	NA	NA	Whole Blood	Negative	NA	NA	NA	NA	NA	NA	NA	NA	NA	NA	NA	NA	NA	NA	-0.528344	NA	Negative	NA	NA	PSLE	Negative	Negative	Positive	Negative	Negative	NA	NA	NA	NA	NA	NA	NA	NA	NA	NA	NA	NA	NA
GSE22098	GSM549477	12	Female	Hispanic	OD	NA	NA	NA	NA	Whole Blood	Negative	NA	NA	NA	NA	NA	NA	NA	NA	NA	NA	NA	NA	NA	NA	1.21721	NA	Negative	NA	NA	PSLE	Negative	Negative	Positive	Negative	Negative	NA	NA	NA	NA	NA	NA	NA	NA	NA	NA	NA	NA	NA
GSE22098	GSM549478	13	Female	African American	OD	NA	NA	NA	NA	Whole Blood	Negative	NA	NA	NA	NA	NA	NA	NA	NA	NA	NA	NA	NA	NA	NA	1.2042	NA	Negative	NA	NA	PSLE	Negative	Negative	Positive	Negative	Negative	NA	NA	NA	NA	NA	NA	NA	NA	NA	NA	NA	NA	NA
GSE22098	GSM549479	14	Female	Hispanic	OD	NA	NA	NA	NA	Whole Blood	Negative	NA	NA	NA	NA	NA	NA	NA	NA	NA	NA	NA	NA	NA	NA	0.54094	NA	Negative	NA	NA	PSLE	Negative	Negative	Positive	Negative	Negative	NA	NA	NA	NA	NA	NA	NA	NA	NA	NA	NA	NA	NA
GSE22098	GSM549480	9	Female	Hispanic	OD	NA	NA	NA	NA	Whole Blood	Negative	NA	NA	NA	NA	NA	NA	NA	NA	NA	NA	NA	NA	NA	NA	0.451815	NA	Negative	NA	NA	PSLE	Negative	Negative	Positive	Negative	Negative	NA	NA	NA	NA	NA	NA	NA	NA	NA	NA	NA	NA	NA
GSE22098	GSM549481	18	Female	Caucasian	OD	NA	NA	NA	NA	Whole Blood	Negative	NA	NA	NA	NA	NA	NA	NA	NA	NA	NA	NA	NA	NA	NA	-0.424672	NA	Negative	NA	NA	PSLE	Negative	Negative	Positive	Negative	Negative	NA	NA	NA	NA	NA	NA	NA	NA	NA	NA	NA	NA	NA
GSE22098	GSM549482	18	Female	Hispanic	OD	NA	NA	NA	NA	Whole Blood	Negative	NA	NA	NA	NA	NA	NA	NA	NA	NA	NA	NA	NA	NA	NA	0.940996	NA	Negative	NA	NA	PSLE	Negative	Negative	Positive	Negative	Negative	NA	NA	NA	NA	NA	NA	NA	NA	NA	NA	NA	NA	NA
GSE22098	GSM549483	16	Female	Hispanic	OD	NA	NA	NA	NA	Whole Blood	Negative	NA	NA	NA	NA	NA	NA	NA	NA	NA	NA	NA	NA	NA	NA	-0.0646741	NA	Negative	NA	NA	PSLE	Negative	Negative	Positive	Negative	Negative	NA	NA	NA	NA	NA	NA	NA	NA	NA	NA	NA	NA	NA
GSE22098	GSM549484	18	Female	Hispanic	OD	NA	NA	NA	NA	Whole Blood	Negative	NA	NA	NA	NA	NA	NA	NA	NA	NA	NA	NA	NA	NA	NA	0.345223	NA	Negative	NA	NA	PSLE	Negative	Negative	Positive	Negative	Negative	NA	NA	NA	NA	NA	NA	NA	NA	NA	NA	NA	NA	NA
GSE22098	GSM549485	14	Female	Hispanic	OD	NA	NA	NA	NA	Whole Blood	Negative	NA	NA	NA	NA	NA	NA	NA	NA	NA	NA	NA	NA	NA	NA	0.563632	NA	Negative	NA	NA	PSLE	Negative	Negative	Positive	Negative	Negative	NA	NA	NA	NA	NA	NA	NA	NA	NA	NA	NA	NA	NA
GSE22098	GSM549486	17	Female	Caucasian	OD	NA	NA	NA	NA	Whole Blood	Negative	NA	NA	NA	NA	NA	NA	NA	NA	NA	NA	NA	NA	NA	NA	0.868498	NA	Negative	NA	NA	PSLE	Negative	Negative	Positive	Negative	Negative	NA	NA	NA	NA	NA	NA	NA	NA	NA	NA	NA	NA	NA
GSE22098	GSM549487	18	Female	Hispanic	OD	NA	NA	NA	NA	Whole Blood	Negative	NA	NA	NA	NA	NA	NA	NA	NA	NA	NA	NA	NA	NA	NA	0.216022	NA	Negative	NA	NA	PSLE	Negative	Negative	Positive	Negative	Negative	NA	NA	NA	NA	NA	NA	NA	NA	NA	NA	NA	NA	NA
GSE22098	GSM549488	10	Female	African American	OD	NA	NA	NA	NA	Whole Blood	Negative	NA	NA	NA	NA	NA	NA	NA	NA	NA	NA	NA	NA	NA	NA	-0.0948309	NA	Negative	NA	NA	PSLE	Negative	Negative	Positive	Negative	Negative	NA	NA	NA	NA	NA	NA	NA	NA	NA	NA	NA	NA	NA
GSE22098	GSM549489	17	Female	African American	OD	NA	NA	NA	NA	Whole Blood	Negative	NA	NA	NA	NA	NA	NA	NA	NA	NA	NA	NA	NA	NA	NA	2.6123	NA	Negative	NA	NA	PSLE	Negative	Negative	Positive	Negative	Negative	NA	NA	NA	NA	NA	NA	NA	NA	NA	NA	NA	NA	NA
GSE22098	GSM549490	7	Male	African American	OD	NA	NA	NA	NA	Whole Blood	Negative	NA	NA	NA	NA	NA	NA	NA	NA	NA	NA	NA	NA	NA	NA	-2.00406	NA	Negative	NA	NA	PSLE	Negative	Negative	Positive	Negative	Negative	NA	NA	NA	NA	NA	NA	NA	NA	NA	NA	NA	NA	NA
GSE22098	GSM549491	18	Female	Hispanic	OD	NA	NA	NA	NA	Whole Blood	Negative	NA	NA	NA	NA	NA	NA	NA	NA	NA	NA	NA	NA	NA	NA	0.735427	NA	Negative	NA	NA	PSLE	Negative	Negative	Positive	Negative	Negative	NA	NA	NA	NA	NA	NA	NA	NA	NA	NA	NA	NA	NA
GSE22098	GSM549492	18	Female	African American	OD	NA	NA	NA	NA	Whole Blood	Negative	NA	NA	NA	NA	NA	NA	NA	NA	NA	NA	NA	NA	NA	NA	0.830375	NA	Negative	NA	NA	PSLE	Negative	Negative	Positive	Negative	Negative	NA	NA	NA	NA	NA	NA	NA	NA	NA	NA	NA	NA	NA
GSE22098	GSM549493	15	Female	Hispanic	OD	NA	NA	NA	NA	Whole Blood	Negative	NA	NA	NA	NA	NA	NA	NA	NA	NA	NA	NA	NA	NA	NA	1.74109	NA	Negative	NA	NA	PSLE	Negative	Negative	Positive	Negative	Negative	NA	NA	NA	NA	NA	NA	NA	NA	NA	NA	NA	NA	NA
GSE22098	GSM549494	16	Female	Hispanic	OD	NA	NA	NA	NA	Whole Blood	Negative	NA	NA	NA	NA	NA	NA	NA	NA	NA	NA	NA	NA	NA	NA	-1.93428	NA	Negative	NA	NA	PSLE	Negative	Negative	Positive	Negative	Negative	NA	NA	NA	NA	NA	NA	NA	NA	NA	NA	NA	NA	NA
GSE22098	GSM549495	16	Male	Hispanic	OD	NA	NA	NA	NA	Whole Blood	Negative	NA	NA	NA	NA	NA	NA	NA	NA	NA	NA	NA	NA	NA	NA	1.39046	NA	Negative	NA	NA	PSLE	Negative	Negative	Positive	Negative	Negative	NA	NA	NA	NA	NA	NA	NA	NA	NA	NA	NA	NA	NA
GSE22098	GSM549496	15	Female	Asian	OD	NA	NA	NA	NA	Whole Blood	Negative	NA	NA	NA	NA	NA	NA	NA	NA	NA	NA	NA	NA	NA	NA	0.061927	NA	Negative	NA	NA	PSLE	Negative	Negative	Positive	Negative	Negative	NA	NA	NA	NA	NA	NA	NA	NA	NA	NA	NA	NA	NA
GSE22098	GSM549497	18	Female	African American	OD	NA	NA	NA	NA	Whole Blood	Negative	NA	NA	NA	NA	NA	NA	NA	NA	NA	NA	NA	NA	NA	NA	0.386973	NA	Negative	NA	NA	PSLE	Negative	Negative	Positive	Negative	Negative	NA	NA	NA	NA	NA	NA	NA	NA	NA	NA	NA	NA	NA
GSE22098	GSM549498	18	Female	African American	OD	NA	NA	NA	NA	Whole Blood	Negative	NA	NA	NA	NA	NA	NA	NA	NA	NA	NA	NA	NA	NA	NA	-0.611488	NA	Negative	NA	NA	PSLE	Negative	Negative	Positive	Negative	Negative	NA	NA	NA	NA	NA	NA	NA	NA	NA	NA	NA	NA	NA
GSE22098	GSM549499	17	Female	Hispanic	OD	NA	NA	NA	NA	Whole Blood	Negative	NA	NA	NA	NA	NA	NA	NA	NA	NA	NA	NA	NA	NA	NA	-1.18533	NA	Negative	NA	NA	PSLE	Negative	Negative	Positive	Negative	Negative	NA	NA	NA	NA	NA	NA	NA	NA	NA	NA	NA	NA	NA
GSE22098	GSM549500	14	Female	Hispanic	OD	NA	NA	NA	NA	Whole Blood	Negative	NA	NA	NA	NA	NA	NA	NA	NA	NA	NA	NA	NA	NA	NA	0.247665	NA	Negative	NA	NA	PSLE	Negative	Negative	Positive	Negative	Negative	NA	NA	NA	NA	NA	NA	NA	NA	NA	NA	NA	NA	NA
GSE22098	GSM549501	15	Female	Asian	OD	NA	NA	NA	NA	Whole Blood	Negative	NA	NA	NA	NA	NA	NA	NA	NA	NA	NA	NA	NA	NA	NA	0.222468	NA	Negative	NA	NA	PSLE	Negative	Negative	Positive	Negative	Negative	NA	NA	NA	NA	NA	NA	NA	NA	NA	NA	NA	NA	NA
GSE22098	GSM549502	13	Male	Hispanic	OD	NA	NA	NA	NA	Whole Blood	Negative	NA	NA	NA	NA	NA	NA	NA	NA	NA	NA	NA	NA	NA	NA	-0.341398	NA	Negative	NA	NA	PSLE	Negative	Negative	Positive	Negative	Negative	NA	NA	NA	NA	NA	NA	NA	NA	NA	NA	NA	NA	NA
GSE22098	GSM549503	19	Female	Hispanic	OD	NA	NA	NA	NA	Whole Blood	Negative	NA	NA	NA	NA	NA	NA	NA	NA	NA	NA	NA	NA	NA	NA	2.40642	NA	Negative	NA	NA	PSLE	Negative	Negative	Positive	Negative	Negative	NA	NA	NA	NA	NA	NA	NA	NA	NA	NA	NA	NA	NA
GSE22098	GSM549504	11	Female	African American	OD	NA	NA	NA	NA	Whole Blood	Negative	NA	NA	NA	NA	NA	NA	NA	NA	NA	NA	NA	NA	NA	NA	0.225331	NA	Negative	NA	NA	PSLE	Negative	Negative	Positive	Negative	Negative	NA	NA	NA	NA	NA	NA	NA	NA	NA	NA	NA	NA	NA
GSE22098	GSM549505	9	Male	Hispanic	OD	NA	NA	NA	NA	Whole Blood	Negative	NA	NA	NA	NA	NA	NA	NA	NA	NA	NA	NA	NA	NA	NA	1.40879	NA	Negative	NA	NA	PSLE	Negative	Negative	Positive	Negative	Negative	NA	NA	NA	NA	NA	NA	NA	NA	NA	NA	NA	NA	NA
GSE22098	GSM549506	11	Female	Hispanic	OD	NA	NA	NA	NA	Whole Blood	Negative	NA	NA	NA	NA	NA	NA	NA	NA	NA	NA	NA	NA	NA	NA	0.324943	NA	Negative	NA	NA	PSLE	Negative	Negative	Positive	Negative	Negative	NA	NA	NA	NA	NA	NA	NA	NA	NA	NA	NA	NA	NA
GSE22098	GSM549507	18	Female	Asian	OD	NA	NA	NA	NA	Whole Blood	Negative	NA	NA	NA	NA	NA	NA	NA	NA	NA	NA	NA	NA	NA	NA	0.727339	NA	Negative	NA	NA	PSLE	Negative	Negative	Positive	Negative	Negative	NA	NA	NA	NA	NA	NA	NA	NA	NA	NA	NA	NA	NA
GSE22098	GSM549508	11	Female	Caucasian	OD	NA	NA	NA	NA	Whole Blood	Negative	NA	NA	NA	NA	NA	NA	NA	NA	NA	NA	NA	NA	NA	NA	-1.21209	NA	Negative	NA	NA	PSLE	Negative	Negative	Positive	Negative	Negative	NA	NA	NA	NA	NA	NA	NA	NA	NA	NA	NA	NA	NA
GSE22098	GSM549509	8	Female	Caucasian	OD	NA	NA	NA	NA	Whole Blood	Negative	NA	NA	NA	NA	NA	NA	NA	NA	NA	NA	NA	NA	NA	NA	1.10256	NA	Negative	NA	NA	PSLE	Negative	Negative	Positive	Negative	Negative	NA	NA	NA	NA	NA	NA	NA	NA	NA	NA	NA	NA	NA
GSE22098	GSM549510	15	Male	Hispanic	OD	NA	NA	NA	NA	Whole Blood	Negative	NA	NA	NA	NA	NA	NA	NA	NA	NA	NA	NA	NA	NA	NA	-0.83016	NA	Negative	NA	NA	PSLE	Negative	Negative	Positive	Negative	Negative	NA	NA	NA	NA	NA	NA	NA	NA	NA	NA	NA	NA	NA
GSE22098	GSM549511	18	Male	African American	OD	NA	NA	NA	NA	Whole Blood	Negative	NA	NA	NA	NA	NA	NA	NA	NA	NA	NA	NA	NA	NA	NA	-0.469492	NA	Negative	NA	NA	PSLE	Negative	Negative	Positive	Negative	Negative	NA	NA	NA	NA	NA	NA	NA	NA	NA	NA	NA	NA	NA
GSE22098	GSM549512	8	Female	Hispanic	OD	NA	NA	NA	NA	Whole Blood	Negative	NA	NA	NA	NA	NA	NA	NA	NA	NA	NA	NA	NA	NA	NA	-1.53576	NA	Negative	NA	NA	PSLE	Negative	Negative	Positive	Negative	Negative	NA	NA	NA	NA	NA	NA	NA	NA	NA	NA	NA	NA	NA
GSE22098	GSM549513	16	Female	Hispanic	OD	NA	NA	NA	NA	Whole Blood	Negative	NA	NA	NA	NA	NA	NA	NA	NA	NA	NA	NA	NA	NA	NA	-0.129404	NA	Negative	NA	NA	PSLE	Negative	Negative	Positive	Negative	Negative	NA	NA	NA	NA	NA	NA	NA	NA	NA	NA	NA	NA	NA
GSE22098	GSM549514	10	Female	Hispanic	OD	NA	NA	NA	NA	Whole Blood	Negative	NA	NA	NA	NA	NA	NA	NA	NA	NA	NA	NA	NA	NA	NA	-0.672679	NA	Negative	NA	NA	PSLE	Negative	Negative	Positive	Negative	Negative	NA	NA	NA	NA	NA	NA	NA	NA	NA	NA	NA	NA	NA
GSE22098	GSM549515	12	Female	Caucasian	OD	NA	NA	NA	NA	Whole Blood	Negative	NA	NA	NA	NA	NA	NA	NA	NA	NA	NA	NA	NA	NA	NA	0.484149	NA	Negative	NA	NA	PSLE	Negative	Negative	Positive	Negative	Negative	NA	NA	NA	NA	NA	NA	NA	NA	NA	NA	NA	NA	NA
GSE22098	GSM549516	11	Female	Caucasian	OD	NA	NA	NA	NA	Whole Blood	Negative	NA	NA	NA	NA	NA	NA	NA	NA	NA	NA	NA	NA	NA	NA	0.125138	NA	Negative	NA	NA	PSLE	Negative	Negative	Positive	Negative	Negative	NA	NA	NA	NA	NA	NA	NA	NA	NA	NA	NA	NA	NA
GSE22098	GSM549517	16	Female	Hispanic	OD	NA	NA	NA	NA	Whole Blood	Negative	NA	NA	NA	NA	NA	NA	NA	NA	NA	NA	NA	NA	NA	NA	0.045736	NA	Negative	NA	NA	PSLE	Negative	Negative	Positive	Negative	Negative	NA	NA	NA	NA	NA	NA	NA	NA	NA	NA	NA	NA	NA
GSE22098	GSM549518	13	Male	Hispanic	OD	NA	NA	NA	NA	Whole Blood	Negative	NA	NA	NA	NA	NA	NA	NA	NA	NA	NA	NA	NA	NA	NA	-0.243599	NA	Negative	NA	NA	PSLE	Negative	Negative	Positive	Negative	Negative	NA	NA	NA	NA	NA	NA	NA	NA	NA	NA	NA	NA	NA
GSE22098	GSM549519	17	Female	African American	OD	NA	NA	NA	NA	Whole Blood	Negative	NA	NA	NA	NA	NA	NA	NA	NA	NA	NA	NA	NA	NA	NA	-0.867983	NA	Negative	NA	NA	PSLE	Negative	Negative	Positive	Negative	Negative	NA	NA	NA	NA	NA	NA	NA	NA	NA	NA	NA	NA	NA
GSE22098	GSM549520	14	Female	African American	OD	NA	NA	NA	NA	Whole Blood	Negative	NA	NA	NA	NA	NA	NA	NA	NA	NA	NA	NA	NA	NA	NA	0.7515	NA	Negative	NA	NA	PSLE	Negative	Negative	Positive	Negative	Negative	NA	NA	NA	NA	NA	NA	NA	NA	NA	NA	NA	NA	NA
GSE22098	GSM549521	13	Female	African American	OD	NA	NA	NA	NA	Whole Blood	Negative	NA	NA	NA	NA	NA	NA	NA	NA	NA	NA	NA	NA	NA	NA	0.0215821	NA	Negative	NA	NA	PSLE	Negative	Negative	Positive	Negative	Negative	NA	NA	NA	NA	NA	NA	NA	NA	NA	NA	NA	NA	NA
GSE22098	GSM549522	12	Female	Hispanic	OD	NA	NA	NA	NA	Whole Blood	Negative	NA	NA	NA	NA	NA	NA	NA	NA	NA	NA	NA	NA	NA	NA	1.21229	NA	Negative	NA	NA	PSLE	Negative	Negative	Positive	Negative	Negative	NA	NA	NA	NA	NA	NA	NA	NA	NA	NA	NA	NA	NA
GSE22098	GSM549523	13	Female	Hispanic	OD	NA	NA	NA	NA	Whole Blood	Negative	NA	NA	NA	NA	NA	NA	NA	NA	NA	NA	NA	NA	NA	NA	1.06321	NA	Negative	NA	NA	PSLE	Negative	Negative	Positive	Negative	Negative	NA	NA	NA	NA	NA	NA	NA	NA	NA	NA	NA	NA	NA
GSE22098	GSM550320	28	Female	Caucasian	Control	NA	NA	NA	NA	Whole Blood	Negative	NA	NA	NA	NA	NA	NA	NA	NA	NA	NA	NA	NA	NA	NA	-1.09676	NA	Negative	NA	NA	Still	Negative	Negative	Negative	Negative	Negative	NA	NA	NA	NA	NA	NA	NA	NA	NA	NA	NA	NA	NA
GSE22098	GSM550321	28	Female	Caucasian	Control	NA	NA	NA	NA	Whole Blood	Negative	NA	NA	NA	NA	NA	NA	NA	NA	NA	NA	NA	NA	NA	NA	-0.474468	NA	Negative	NA	NA	Still	Negative	Negative	Negative	Negative	Negative	NA	NA	NA	NA	NA	NA	NA	NA	NA	NA	NA	NA	NA
GSE22098	GSM550322	24	Female	Caucasian	Control	NA	NA	NA	NA	Whole Blood	Negative	NA	NA	NA	NA	NA	NA	NA	NA	NA	NA	NA	NA	NA	NA	0.0437786	NA	Negative	NA	NA	Still	Negative	Negative	Negative	Negative	Negative	NA	NA	NA	NA	NA	NA	NA	NA	NA	NA	NA	NA	NA
GSE22098	GSM550323	33	Female	Caucasian	Control	NA	NA	NA	NA	Whole Blood	Negative	NA	NA	NA	NA	NA	NA	NA	NA	NA	NA	NA	NA	NA	NA	1.13771	NA	Negative	NA	NA	Still	Negative	Negative	Negative	Negative	Negative	NA	NA	NA	NA	NA	NA	NA	NA	NA	NA	NA	NA	NA
GSE22098	GSM550324	38	Female	Caucasian	Control	NA	NA	NA	NA	Whole Blood	Negative	NA	NA	NA	NA	NA	NA	NA	NA	NA	NA	NA	NA	NA	NA	-1.60259	NA	Negative	NA	NA	Still	Negative	Negative	Negative	Negative	Negative	NA	NA	NA	NA	NA	NA	NA	NA	NA	NA	NA	NA	NA
GSE22098	GSM550325	29	Female	Caucasian	Control	NA	NA	NA	NA	Whole Blood	Negative	NA	NA	NA	NA	NA	NA	NA	NA	NA	NA	NA	NA	NA	NA	-1.35839	NA	Negative	NA	NA	Still	Negative	Negative	Negative	Negative	Negative	NA	NA	NA	NA	NA	NA	NA	NA	NA	NA	NA	NA	NA
GSE22098	GSM550326	25	Male	Caucasian	Control	NA	NA	NA	NA	Whole Blood	Negative	NA	NA	NA	NA	NA	NA	NA	NA	NA	NA	NA	NA	NA	NA	-0.475677	NA	Negative	NA	NA	Still	Negative	Negative	Negative	Negative	Negative	NA	NA	NA	NA	NA	NA	NA	NA	NA	NA	NA	NA	NA
GSE22098	GSM550327	35	Male	Caucasian	Control	NA	NA	NA	NA	Whole Blood	Negative	NA	NA	NA	NA	NA	NA	NA	NA	NA	NA	NA	NA	NA	NA	0.95074	NA	Negative	NA	NA	Still	Negative	Negative	Negative	Negative	Negative	NA	NA	NA	NA	NA	NA	NA	NA	NA	NA	NA	NA	NA
GSE22098	GSM550328	27	Male	Caucasian	Control	NA	NA	NA	NA	Whole Blood	Negative	NA	NA	NA	NA	NA	NA	NA	NA	NA	NA	NA	NA	NA	NA	0.443555	NA	Negative	NA	NA	Still	Negative	Negative	Negative	Negative	Negative	NA	NA	NA	NA	NA	NA	NA	NA	NA	NA	NA	NA	NA
GSE22098	GSM550329	38	Male	Caucasian	Control	NA	NA	NA	NA	Whole Blood	Negative	NA	NA	NA	NA	NA	NA	NA	NA	NA	NA	NA	NA	NA	NA	-1.63908	NA	Negative	NA	NA	Still	Negative	Negative	Negative	Negative	Negative	NA	NA	NA	NA	NA	NA	NA	NA	NA	NA	NA	NA	NA
GSE22098	GSM550330	49	Female	Caucasian	Control	NA	NA	NA	NA	Whole Blood	Negative	NA	NA	NA	NA	NA	NA	NA	NA	NA	NA	NA	NA	NA	NA	0.0906144	NA	Negative	NA	NA	Still	Negative	Negative	Negative	Negative	Negative	NA	NA	NA	NA	NA	NA	NA	NA	NA	NA	NA	NA	NA
GSE22098	GSM550331	27	Male	Caucasian	Control	NA	NA	NA	NA	Whole Blood	Negative	NA	NA	NA	NA	NA	NA	NA	NA	NA	NA	NA	NA	NA	NA	-1.64406	NA	Negative	NA	NA	Still	Negative	Negative	Negative	Negative	Negative	NA	NA	NA	NA	NA	NA	NA	NA	NA	NA	NA	NA	NA
GSE22098	GSM550332	35	Male	Asian	Control	NA	NA	NA	NA	Whole Blood	Negative	NA	NA	NA	NA	NA	NA	NA	NA	NA	NA	NA	NA	NA	NA	0.35263	NA	Negative	NA	NA	Still	Negative	Negative	Negative	Negative	Negative	NA	NA	NA	NA	NA	NA	NA	NA	NA	NA	NA	NA	NA
GSE22098	GSM550333	29	Female	Caucasian	Control	NA	NA	NA	NA	Whole Blood	Negative	NA	NA	NA	NA	NA	NA	NA	NA	NA	NA	NA	NA	NA	NA	-0.290193	NA	Negative	NA	NA	Still	Negative	Negative	Negative	Negative	Negative	NA	NA	NA	NA	NA	NA	NA	NA	NA	NA	NA	NA	NA
GSE22098	GSM550334	43	Male	Caucasian	Control	NA	NA	NA	NA	Whole Blood	Negative	NA	NA	NA	NA	NA	NA	NA	NA	NA	NA	NA	NA	NA	NA	0.674909	NA	Negative	NA	NA	Still	Negative	Negative	Negative	Negative	Negative	NA	NA	NA	NA	NA	NA	NA	NA	NA	NA	NA	NA	NA
GSE22098	GSM550335	20	Female	Caucasian	Control	NA	NA	NA	NA	Whole Blood	Negative	NA	NA	NA	NA	NA	NA	NA	NA	NA	NA	NA	NA	NA	NA	1.17179	NA	Negative	NA	NA	Still	Negative	Negative	Negative	Negative	Negative	NA	NA	NA	NA	NA	NA	NA	NA	NA	NA	NA	NA	NA
GSE22098	GSM550336	30	Male	Caucasian	Control	NA	NA	NA	NA	Whole Blood	Negative	NA	NA	NA	NA	NA	NA	NA	NA	NA	NA	NA	NA	NA	NA	-0.345501	NA	Negative	NA	NA	Still	Negative	Negative	Negative	Negative	Negative	NA	NA	NA	NA	NA	NA	NA	NA	NA	NA	NA	NA	NA
GSE22098	GSM550337	50	Female	Caucasian	Control	NA	NA	NA	NA	Whole Blood	Negative	NA	NA	NA	NA	NA	NA	NA	NA	NA	NA	NA	NA	NA	NA	-0.700406	NA	Negative	NA	NA	Still	Negative	Negative	Negative	Negative	Negative	NA	NA	NA	NA	NA	NA	NA	NA	NA	NA	NA	NA	NA
GSE22098	GSM550338	44	Female	Caucasian	Control	NA	NA	NA	NA	Whole Blood	Negative	NA	NA	NA	NA	NA	NA	NA	NA	NA	NA	NA	NA	NA	NA	-1.28735	NA	Negative	NA	NA	Still	Negative	Negative	Negative	Negative	Negative	NA	NA	NA	NA	NA	NA	NA	NA	NA	NA	NA	NA	NA
GSE22098	GSM550339	58	Male	Caucasian	Control	NA	NA	NA	NA	Whole Blood	Negative	NA	NA	NA	NA	NA	NA	NA	NA	NA	NA	NA	NA	NA	NA	0.938241	NA	Negative	NA	NA	Still	Negative	Negative	Negative	Negative	Negative	NA	NA	NA	NA	NA	NA	NA	NA	NA	NA	NA	NA	NA
GSE22098	GSM550340	31	Female	Caucasian	Control	NA	NA	NA	NA	Whole Blood	Negative	NA	NA	NA	NA	NA	NA	NA	NA	NA	NA	NA	NA	NA	NA	1.20571	NA	Negative	NA	NA	Still	Negative	Negative	Negative	Negative	Negative	NA	NA	NA	NA	NA	NA	NA	NA	NA	NA	NA	NA	NA
GSE22098	GSM550341	53	Female	Caucasian	Control	NA	NA	NA	NA	Whole Blood	Negative	NA	NA	NA	NA	NA	NA	NA	NA	NA	NA	NA	NA	NA	NA	0.946237	NA	Negative	NA	NA	ASLE	Negative	Negative	Negative	Negative	Negative	NA	NA	NA	NA	NA	NA	NA	NA	NA	NA	NA	NA	NA
GSE22098	GSM550342	45	Female	Caucasian	Control	NA	NA	NA	NA	Whole Blood	Negative	NA	NA	NA	NA	NA	NA	NA	NA	NA	NA	NA	NA	NA	NA	1.17584	NA	Negative	NA	NA	ASLE	Negative	Negative	Negative	Negative	Negative	NA	NA	NA	NA	NA	NA	NA	NA	NA	NA	NA	NA	NA
GSE22098	GSM550343	55	Female	Caucasian	Control	NA	NA	NA	NA	Whole Blood	Negative	NA	NA	NA	NA	NA	NA	NA	NA	NA	NA	NA	NA	NA	NA	0.829506	NA	Negative	NA	NA	ASLE	Negative	Negative	Negative	Negative	Negative	NA	NA	NA	NA	NA	NA	NA	NA	NA	NA	NA	NA	NA
GSE22098	GSM550344	43	Female	Caucasian	Control	NA	NA	NA	NA	Whole Blood	Negative	NA	NA	NA	NA	NA	NA	NA	NA	NA	NA	NA	NA	NA	NA	-0.409756	NA	Negative	NA	NA	ASLE	Negative	Negative	Negative	Negative	Negative	NA	NA	NA	NA	NA	NA	NA	NA	NA	NA	NA	NA	NA
GSE22098	GSM550345	43	Female	Caucasian	Control	NA	NA	NA	NA	Whole Blood	Negative	NA	NA	NA	NA	NA	NA	NA	NA	NA	NA	NA	NA	NA	NA	0.236848	NA	Negative	NA	NA	ASLE	Negative	Negative	Negative	Negative	Negative	NA	NA	NA	NA	NA	NA	NA	NA	NA	NA	NA	NA	NA
GSE22098	GSM550346	42	Female	Caucasian	Control	NA	NA	NA	NA	Whole Blood	Negative	NA	NA	NA	NA	NA	NA	NA	NA	NA	NA	NA	NA	NA	NA	0.224673	NA	Negative	NA	NA	ASLE	Negative	Negative	Negative	Negative	Negative	NA	NA	NA	NA	NA	NA	NA	NA	NA	NA	NA	NA	NA
GSE22098	GSM550347	57	Female	Caucasian	Control	NA	NA	NA	NA	Whole Blood	Negative	NA	NA	NA	NA	NA	NA	NA	NA	NA	NA	NA	NA	NA	NA	0.662407	NA	Negative	NA	NA	ASLE	Negative	Negative	Negative	Negative	Negative	NA	NA	NA	NA	NA	NA	NA	NA	NA	NA	NA	NA	NA
GSE22098	GSM550348	51	Female	Caucasian	Control	NA	NA	NA	NA	Whole Blood	Negative	NA	NA	NA	NA	NA	NA	NA	NA	NA	NA	NA	NA	NA	NA	-0.125097	NA	Negative	NA	NA	ASLE	Negative	Negative	Negative	Negative	Negative	NA	NA	NA	NA	NA	NA	NA	NA	NA	NA	NA	NA	NA
GSE22098	GSM550349	74	Female	Caucasian	Control	NA	NA	NA	NA	Whole Blood	Negative	NA	NA	NA	NA	NA	NA	NA	NA	NA	NA	NA	NA	NA	NA	-0.141544	NA	Negative	NA	NA	ASLE	Negative	Negative	Negative	Negative	Negative	NA	NA	NA	NA	NA	NA	NA	NA	NA	NA	NA	NA	NA
GSE22098	GSM550350	43	Male	Caucasian	Control	NA	NA	NA	NA	Whole Blood	Negative	NA	NA	NA	NA	NA	NA	NA	NA	NA	NA	NA	NA	NA	NA	0.646932	NA	Negative	NA	NA	ASLE	Negative	Negative	Negative	Negative	Negative	NA	NA	NA	NA	NA	NA	NA	NA	NA	NA	NA	NA	NA
GSE22098	GSM550351	84	Female	Caucasian	Control	NA	NA	NA	NA	Whole Blood	Negative	NA	NA	NA	NA	NA	NA	NA	NA	NA	NA	NA	NA	NA	NA	0.0118637	NA	Negative	NA	NA	ASLE	Negative	Negative	Negative	Negative	Negative	NA	NA	NA	NA	NA	NA	NA	NA	NA	NA	NA	NA	NA
GSE22098	GSM550352	37	Female	Caucasian	Control	NA	NA	NA	NA	Whole Blood	Negative	NA	NA	NA	NA	NA	NA	NA	NA	NA	NA	NA	NA	NA	NA	-0.0239499	NA	Negative	NA	NA	ASLE	Negative	Negative	Negative	Negative	Negative	NA	NA	NA	NA	NA	NA	NA	NA	NA	NA	NA	NA	NA
GSE22098	GSM550353	39	Female	Hispanic	Control	NA	NA	NA	NA	Whole Blood	Negative	NA	NA	NA	NA	NA	NA	NA	NA	NA	NA	NA	NA	NA	NA	-0.048973	NA	Negative	NA	NA	ASLE	Negative	Negative	Negative	Negative	Negative	NA	NA	NA	NA	NA	NA	NA	NA	NA	NA	NA	NA	NA
GSE22098	GSM550354	35	Female	Asian	Control	NA	NA	NA	NA	Whole Blood	Negative	NA	NA	NA	NA	NA	NA	NA	NA	NA	NA	NA	NA	NA	NA	0.404457	NA	Negative	NA	NA	ASLE	Negative	Negative	Negative	Negative	Negative	NA	NA	NA	NA	NA	NA	NA	NA	NA	NA	NA	NA	NA
GSE22098	GSM550355	45	Male	Caucasian	Control	NA	NA	NA	NA	Whole Blood	Negative	NA	NA	NA	NA	NA	NA	NA	NA	NA	NA	NA	NA	NA	NA	-0.363711	NA	Negative	NA	NA	ASLE	Negative	Negative	Negative	Negative	Negative	NA	NA	NA	NA	NA	NA	NA	NA	NA	NA	NA	NA	NA
GSE22098	GSM550356	43	Female	Caucasian	Control	NA	NA	NA	NA	Whole Blood	Negative	NA	NA	NA	NA	NA	NA	NA	NA	NA	NA	NA	NA	NA	NA	-0.287653	NA	Negative	NA	NA	ASLE	Negative	Negative	Negative	Negative	Negative	NA	NA	NA	NA	NA	NA	NA	NA	NA	NA	NA	NA	NA
GSE22098	GSM550357	43	Female	Caucasian	Control	NA	NA	NA	NA	Whole Blood	Negative	NA	NA	NA	NA	NA	NA	NA	NA	NA	NA	NA	NA	NA	NA	0.291528	NA	Negative	NA	NA	ASLE	Negative	Negative	Negative	Negative	Negative	NA	NA	NA	NA	NA	NA	NA	NA	NA	NA	NA	NA	NA
GSE22098	GSM550358	14	Female	Hispanic	Control	NA	NA	NA	NA	Whole Blood	Negative	NA	NA	NA	NA	NA	NA	NA	NA	NA	NA	NA	NA	NA	NA	-0.446747	NA	Negative	NA	NA	pSLE	Negative	Negative	Negative	Negative	Negative	NA	NA	NA	NA	NA	NA	NA	NA	NA	NA	NA	NA	NA
GSE22098	GSM550359	15	Female	Caucasian	Control	NA	NA	NA	NA	Whole Blood	Negative	NA	NA	NA	NA	NA	NA	NA	NA	NA	NA	NA	NA	NA	NA	-0.878108	NA	Negative	NA	NA	pSLE	Negative	Negative	Negative	Negative	Negative	NA	NA	NA	NA	NA	NA	NA	NA	NA	NA	NA	NA	NA
GSE22098	GSM550360	14	Male	Hispanic	Control	NA	NA	NA	NA	Whole Blood	Negative	NA	NA	NA	NA	NA	NA	NA	NA	NA	NA	NA	NA	NA	NA	-1.28561	NA	Negative	NA	NA	pSLE	Negative	Negative	Negative	Negative	Negative	NA	NA	NA	NA	NA	NA	NA	NA	NA	NA	NA	NA	NA
GSE22098	GSM550361	16	Female	Hispanic	Control	NA	NA	NA	NA	Whole Blood	Negative	NA	NA	NA	NA	NA	NA	NA	NA	NA	NA	NA	NA	NA	NA	0.881916	NA	Negative	NA	NA	pSLE	Negative	Negative	Negative	Negative	Negative	NA	NA	NA	NA	NA	NA	NA	NA	NA	NA	NA	NA	NA
GSE22098	GSM550362	17	Female	Afican American	Control	NA	NA	NA	NA	Whole Blood	Negative	NA	NA	NA	NA	NA	NA	NA	NA	NA	NA	NA	NA	NA	NA	-1.70818	NA	Negative	NA	NA	pSLE	Negative	Negative	Negative	Negative	Negative	NA	NA	NA	NA	NA	NA	NA	NA	NA	NA	NA	NA	NA
GSE22098	GSM550363	16	Female	Caucasian	Control	NA	NA	NA	NA	Whole Blood	Negative	NA	NA	NA	NA	NA	NA	NA	NA	NA	NA	NA	NA	NA	NA	0.453642	NA	Negative	NA	NA	pSLE	Negative	Negative	Negative	Negative	Negative	NA	NA	NA	NA	NA	NA	NA	NA	NA	NA	NA	NA	NA
GSE22098	GSM550364	16	Female	Hispanic	Control	NA	NA	NA	NA	Whole Blood	Negative	NA	NA	NA	NA	NA	NA	NA	NA	NA	NA	NA	NA	NA	NA	0.6833	NA	Negative	NA	NA	pSLE	Negative	Negative	Negative	Negative	Negative	NA	NA	NA	NA	NA	NA	NA	NA	NA	NA	NA	NA	NA
GSE22098	GSM550365	16	Male	Hispanic	Control	NA	NA	NA	NA	Whole Blood	Negative	NA	NA	NA	NA	NA	NA	NA	NA	NA	NA	NA	NA	NA	NA	1.2021	NA	Negative	NA	NA	pSLE	Negative	Negative	Negative	Negative	Negative	NA	NA	NA	NA	NA	NA	NA	NA	NA	NA	NA	NA	NA
GSE22098	GSM550366	11	Male	Afican American	Control	NA	NA	NA	NA	Whole Blood	Negative	NA	NA	NA	NA	NA	NA	NA	NA	NA	NA	NA	NA	NA	NA	-0.985639	NA	Negative	NA	NA	Strep and Staph	Negative	Negative	Negative	Negative	Negative	NA	NA	NA	NA	NA	NA	NA	NA	NA	NA	NA	NA	NA
GSE22098	GSM550367	7	Male	Hispanic	Control	NA	NA	NA	NA	Whole Blood	Negative	NA	NA	NA	NA	NA	NA	NA	NA	NA	NA	NA	NA	NA	NA	-0.877467	NA	Negative	NA	NA	Strep and Staph	Negative	Negative	Negative	Negative	Negative	NA	NA	NA	NA	NA	NA	NA	NA	NA	NA	NA	NA	NA
GSE22098	GSM550368	8	Male	Caucasian	Control	NA	NA	NA	NA	Whole Blood	Negative	NA	NA	NA	NA	NA	NA	NA	NA	NA	NA	NA	NA	NA	NA	-1.9698	NA	Negative	NA	NA	Strep and Staph	Negative	Negative	Negative	Negative	Negative	NA	NA	NA	NA	NA	NA	NA	NA	NA	NA	NA	NA	NA
GSE22098	GSM550369	6	Female	Hispanic	Control	NA	NA	NA	NA	Whole Blood	Negative	NA	NA	NA	NA	NA	NA	NA	NA	NA	NA	NA	NA	NA	NA	0.951331	NA	Negative	NA	NA	Strep and Staph	Negative	Negative	Negative	Negative	Negative	NA	NA	NA	NA	NA	NA	NA	NA	NA	NA	NA	NA	NA
GSE22098	GSM550370	10	Female	Hispanic	Control	NA	NA	NA	NA	Whole Blood	Negative	NA	NA	NA	NA	NA	NA	NA	NA	NA	NA	NA	NA	NA	NA	0.572615	NA	Negative	NA	NA	Strep and Staph	Negative	Negative	Negative	Negative	Negative	NA	NA	NA	NA	NA	NA	NA	NA	NA	NA	NA	NA	NA
GSE22098	GSM550371	5	Male	Hispanic	Control	NA	NA	NA	NA	Whole Blood	Negative	NA	NA	NA	NA	NA	NA	NA	NA	NA	NA	NA	NA	NA	NA	-1.46265	NA	Negative	NA	NA	Strep and Staph	Negative	Negative	Negative	Negative	Negative	NA	NA	NA	NA	NA	NA	NA	NA	NA	NA	NA	NA	NA
GSE22098	GSM550372	8	Male	Hispanic	Control	NA	NA	NA	NA	Whole Blood	Negative	NA	NA	NA	NA	NA	NA	NA	NA	NA	NA	NA	NA	NA	NA	1.56358	NA	Negative	NA	NA	Strep and Staph	Negative	Negative	Negative	Negative	Negative	NA	NA	NA	NA	NA	NA	NA	NA	NA	NA	NA	NA	NA
GSE22098	GSM550373	15	Female	Hispanic	Control	NA	NA	NA	NA	Whole Blood	Negative	NA	NA	NA	NA	NA	NA	NA	NA	NA	NA	NA	NA	NA	NA	-0.224808	NA	Negative	NA	NA	Strep and Staph	Negative	Negative	Negative	Negative	Negative	NA	NA	NA	NA	NA	NA	NA	NA	NA	NA	NA	NA	NA
GSE22098	GSM550374	18	Male	Hispanic	Control	NA	NA	NA	NA	Whole Blood	Negative	NA	NA	NA	NA	NA	NA	NA	NA	NA	NA	NA	NA	NA	NA	-0.291362	NA	Negative	NA	NA	Strep and Staph	Negative	Negative	Negative	Negative	Negative	NA	NA	NA	NA	NA	NA	NA	NA	NA	NA	NA	NA	NA
GSE22098	GSM550375	5	Male	Hispanic	Control	NA	NA	NA	NA	Whole Blood	Negative	NA	NA	NA	NA	NA	NA	NA	NA	NA	NA	NA	NA	NA	NA	-0.615183	NA	Negative	NA	NA	Strep and Staph	Negative	Negative	Negative	Negative	Negative	NA	NA	NA	NA	NA	NA	NA	NA	NA	NA	NA	NA	NA
GSE22098	GSM550376	6	Female	Hispanic	Control	NA	NA	NA	NA	Whole Blood	Negative	NA	NA	NA	NA	NA	NA	NA	NA	NA	NA	NA	NA	NA	NA	0.00666088	NA	Negative	NA	NA	Strep and Staph	Negative	Negative	Negative	Negative	Negative	NA	NA	NA	NA	NA	NA	NA	NA	NA	NA	NA	NA	NA
GSE22098	GSM550377	17	Male	Hispanic	Control	NA	NA	NA	NA	Whole Blood	Negative	NA	NA	NA	NA	NA	NA	NA	NA	NA	NA	NA	NA	NA	NA	-0.159503	NA	Negative	NA	NA	Strep and Staph	Negative	Negative	Negative	Negative	Negative	NA	NA	NA	NA	NA	NA	NA	NA	NA	NA	NA	NA	NA
GSE22098	GSM550378	4	Female	Caucasian	Control	NA	NA	NA	NA	Whole Blood	Negative	NA	NA	NA	NA	NA	NA	NA	NA	NA	NA	NA	NA	NA	NA	-0.637617	NA	Negative	NA	NA	Strep and Staph	Negative	Negative	Negative	Negative	Negative	NA	NA	NA	NA	NA	NA	NA	NA	NA	NA	NA	NA	NA
GSE22098	GSM550379	8	Female	Hispanic	Control	NA	NA	NA	NA	Whole Blood	Negative	NA	NA	NA	NA	NA	NA	NA	NA	NA	NA	NA	NA	NA	NA	-0.299127	NA	Negative	NA	NA	Strep and Staph	Negative	Negative	Negative	Negative	Negative	NA	NA	NA	NA	NA	NA	NA	NA	NA	NA	NA	NA	NA
GSE22098	GSM550380	12	Female	Afican American	Control	NA	NA	NA	NA	Whole Blood	Negative	NA	NA	NA	NA	NA	NA	NA	NA	NA	NA	NA	NA	NA	NA	-0.172599	NA	Negative	NA	NA	Strep and Staph	Negative	Negative	Negative	Negative	Negative	NA	NA	NA	NA	NA	NA	NA	NA	NA	NA	NA	NA	NA
GSE22098	GSM550381	4	Female	Afican American	Control	NA	NA	NA	NA	Whole Blood	Negative	NA	NA	NA	NA	NA	NA	NA	NA	NA	NA	NA	NA	NA	NA	-0.2105	NA	Negative	NA	NA	Strep and Staph	Negative	Negative	Negative	Negative	Negative	NA	NA	NA	NA	NA	NA	NA	NA	NA	NA	NA	NA	NA
GSE22098	GSM550382	10	Female	Afican American	Control	NA	NA	NA	NA	Whole Blood	Negative	NA	NA	NA	NA	NA	NA	NA	NA	NA	NA	NA	NA	NA	NA	0.115187	NA	Negative	NA	NA	Strep and Staph	Negative	Negative	Negative	Negative	Negative	NA	NA	NA	NA	NA	NA	NA	NA	NA	NA	NA	NA	NA
GSE22098	GSM550383	8	Male	Caucasian/Asian	Control	NA	NA	NA	NA	Whole Blood	Negative	NA	NA	NA	NA	NA	NA	NA	NA	NA	NA	NA	NA	NA	NA	-1.20375	NA	Negative	NA	NA	Strep and Staph	Negative	Negative	Negative	Negative	Negative	NA	NA	NA	NA	NA	NA	NA	NA	NA	NA	NA	NA	NA
GSE22098	GSM550384	7	Male	Caucasian	Control	NA	NA	NA	NA	Whole Blood	Negative	NA	NA	NA	NA	NA	NA	NA	NA	NA	NA	NA	NA	NA	NA	0.238819	NA	Negative	NA	NA	Strep and Staph	Negative	Negative	Negative	Negative	Negative	NA	NA	NA	NA	NA	NA	NA	NA	NA	NA	NA	NA	NA
GSE22098	GSM550385	5	Male	Afican American	Control	NA	NA	NA	NA	Whole Blood	Negative	NA	NA	NA	NA	NA	NA	NA	NA	NA	NA	NA	NA	NA	NA	0.476699	NA	Negative	NA	NA	Strep and Staph	Negative	Negative	Negative	Negative	Negative	NA	NA	NA	NA	NA	NA	NA	NA	NA	NA	NA	NA	NA
GSE22098	GSM550386	5	Male	Hispanic	Control	NA	NA	NA	NA	Whole Blood	Negative	NA	NA	NA	NA	NA	NA	NA	NA	NA	NA	NA	NA	NA	NA	-2.3108	NA	Negative	NA	NA	Strep and Staph	Negative	Negative	Negative	Negative	Negative	NA	NA	NA	NA	NA	NA	NA	NA	NA	NA	NA	NA	NA
GSE22098	GSM550387	6	Female	Afican American	Control	NA	NA	NA	NA	Whole Blood	Negative	NA	NA	NA	NA	NA	NA	NA	NA	NA	NA	NA	NA	NA	NA	-2.0161	NA	Negative	NA	NA	Strep and Staph	Negative	Negative	Negative	Negative	Negative	NA	NA	NA	NA	NA	NA	NA	NA	NA	NA	NA	NA	NA
GSE22098	GSM550388	7	Male	Caucasian	Control	NA	NA	NA	NA	Whole Blood	Negative	NA	NA	NA	NA	NA	NA	NA	NA	NA	NA	NA	NA	NA	NA	-0.741798	NA	Negative	NA	NA	Strep and Staph	Negative	Negative	Negative	Negative	Negative	NA	NA	NA	NA	NA	NA	NA	NA	NA	NA	NA	NA	NA
GSE22098	GSM550389	24	Female	Asian	Control	NA	NA	NA	NA	Whole Blood	Negative	NA	NA	NA	NA	NA	NA	NA	NA	NA	NA	NA	NA	NA	NA	-0.280804	NA	Negative	NA	NA	Still	Negative	Negative	Negative	Negative	Negative	NA	NA	NA	NA	NA	NA	NA	NA	NA	NA	NA	NA	NA
GSE22098	GSM550390	16	Female	Hispanic	Control	NA	NA	NA	NA	Whole Blood	Negative	NA	NA	NA	NA	NA	NA	NA	NA	NA	NA	NA	NA	NA	NA	0.126845	NA	Negative	NA	NA	pSLE	Negative	Negative	Negative	Negative	Negative	NA	NA	NA	NA	NA	NA	NA	NA	NA	NA	NA	NA	NA
GSE22098	GSM550391	14	Male	Hispanic	Control	NA	NA	NA	NA	Whole Blood	Negative	NA	NA	NA	NA	NA	NA	NA	NA	NA	NA	NA	NA	NA	NA	0.64662	NA	Negative	NA	NA	pSLE	Negative	Negative	Negative	Negative	Negative	NA	NA	NA	NA	NA	NA	NA	NA	NA	NA	NA	NA	NA
GSE22098	GSM550392	14	Female	Hispanic	Control	NA	NA	NA	NA	Whole Blood	Negative	NA	NA	NA	NA	NA	NA	NA	NA	NA	NA	NA	NA	NA	NA	-0.278229	NA	Negative	NA	NA	pSLE	Negative	Negative	Negative	Negative	Negative	NA	NA	NA	NA	NA	NA	NA	NA	NA	NA	NA	NA	NA
GSE22098	GSM550393	11	Male	Hispanic	Control	NA	NA	NA	NA	Whole Blood	Negative	NA	NA	NA	NA	NA	NA	NA	NA	NA	NA	NA	NA	NA	NA	0.717224	NA	Negative	NA	NA	pSLE	Negative	Negative	Negative	Negative	Negative	NA	NA	NA	NA	NA	NA	NA	NA	NA	NA	NA	NA	NA
GSE22098	GSM550394	9	Female	Asian	Control	NA	NA	NA	NA	Whole Blood	Negative	NA	NA	NA	NA	NA	NA	NA	NA	NA	NA	NA	NA	NA	NA	-0.095466	NA	Negative	NA	NA	pSLE	Negative	Negative	Negative	Negative	Negative	NA	NA	NA	NA	NA	NA	NA	NA	NA	NA	NA	NA	NA
GSE22098	GSM550395	10	Female	Afican American	Control	NA	NA	NA	NA	Whole Blood	Negative	NA	NA	NA	NA	NA	NA	NA	NA	NA	NA	NA	NA	NA	NA	-0.221498	NA	Negative	NA	NA	pSLE	Negative	Negative	Negative	Negative	Negative	NA	NA	NA	NA	NA	NA	NA	NA	NA	NA	NA	NA	NA
GSE22098	GSM550396	10	Female	Hispanic	Control	NA	NA	NA	NA	Whole Blood	Negative	NA	NA	NA	NA	NA	NA	NA	NA	NA	NA	NA	NA	NA	NA	-0.0955537	NA	Negative	NA	NA	pSLE	Negative	Negative	Negative	Negative	Negative	NA	NA	NA	NA	NA	NA	NA	NA	NA	NA	NA	NA	NA
GSE22098	GSM550397	17	Female	Hispanic	Control	NA	NA	NA	NA	Whole Blood	Negative	NA	NA	NA	NA	NA	NA	NA	NA	NA	NA	NA	NA	NA	NA	0.0333002	NA	Negative	NA	NA	pSLE	Negative	Negative	Negative	Negative	Negative	NA	NA	NA	NA	NA	NA	NA	NA	NA	NA	NA	NA	NA
GSE22098	GSM550398	18	Female	Caucasian	Control	NA	NA	NA	NA	Whole Blood	Negative	NA	NA	NA	NA	NA	NA	NA	NA	NA	NA	NA	NA	NA	NA	0.324303	NA	Negative	NA	NA	pSLE	Negative	Negative	Negative	Negative	Negative	NA	NA	NA	NA	NA	NA	NA	NA	NA	NA	NA	NA	NA
GSE22098	GSM550399	14	Male	Afican American	Control	NA	NA	NA	NA	Whole Blood	Negative	NA	NA	NA	NA	NA	NA	NA	NA	NA	NA	NA	NA	NA	NA	-1.60129	NA	Negative	NA	NA	pSLE	Negative	Negative	Negative	Negative	Negative	NA	NA	NA	NA	NA	NA	NA	NA	NA	NA	NA	NA	NA
GSE22098	GSM550400	18	Female	Afican American	Control	NA	NA	NA	NA	Whole Blood	Negative	NA	NA	NA	NA	NA	NA	NA	NA	NA	NA	NA	NA	NA	NA	-0.606224	NA	Negative	NA	NA	pSLE	Negative	Negative	Negative	Negative	Negative	NA	NA	NA	NA	NA	NA	NA	NA	NA	NA	NA	NA	NA
GSE29536	GSM731200	NA	NA	NA	PTB	UK	NA	NA	NA	Whole Blood	Negative	NA	NA	NA	NA	NA	NA	NA	NA	NA	NA	NA	NA	NA	NA	0.613537	NA	NA	NA	NA	NA	NA	NA	NA	NA	NA	NA	NA	NA	NA	NA	NA	NA	NA	NA	NA	NA	NA	NA
GSE29536	GSM731201	NA	NA	NA	PTB	UK	NA	NA	NA	Whole Blood	Negative	NA	NA	NA	NA	NA	NA	NA	NA	NA	NA	NA	NA	NA	NA	0.80242	NA	NA	NA	NA	NA	NA	NA	NA	NA	NA	NA	NA	NA	NA	NA	NA	NA	NA	NA	NA	NA	NA	NA
GSE29536	GSM731202	NA	NA	NA	Control	UK	Yes	NA	NA	Whole Blood	Negative	NA	NA	NA	NA	NA	NA	NA	NA	NA	NA	NA	NA	NA	NA	-0.624347	NA	NA	NA	NA	NA	NA	NA	NA	NA	NA	NA	NA	NA	NA	NA	NA	NA	NA	NA	NA	NA	NA	NA
GSE29536	GSM731203	NA	NA	NA	PTB	UK	NA	NA	NA	Whole Blood	Negative	NA	NA	NA	NA	NA	NA	NA	NA	NA	NA	NA	NA	NA	NA	1.10185	NA	NA	NA	NA	NA	NA	NA	NA	NA	NA	NA	NA	NA	NA	NA	NA	NA	NA	NA	NA	NA	NA	NA
GSE29536	GSM731204	NA	NA	NA	Control	UK	No	NA	NA	Whole Blood	Negative	NA	NA	NA	NA	NA	NA	NA	NA	NA	NA	NA	NA	NA	NA	-0.610099	NA	NA	NA	NA	NA	NA	NA	NA	NA	NA	NA	NA	NA	NA	NA	NA	NA	NA	NA	NA	NA	NA	NA
GSE29536	GSM731205	NA	NA	NA	PTB	UK	NA	NA	NA	Whole Blood	Negative	NA	NA	NA	NA	NA	NA	NA	NA	NA	NA	NA	NA	NA	NA	0.585313	NA	NA	NA	NA	NA	NA	NA	NA	NA	NA	NA	NA	NA	NA	NA	NA	NA	NA	NA	NA	NA	NA	NA
GSE29536	GSM731206	NA	NA	NA	Control	UK	Yes	NA	NA	Whole Blood	Negative	NA	NA	NA	NA	NA	NA	NA	NA	NA	NA	NA	NA	NA	NA	-0.772191	NA	NA	NA	NA	NA	NA	NA	NA	NA	NA	NA	NA	NA	NA	NA	NA	NA	NA	NA	NA	NA	NA	NA
GSE29536	GSM731207	NA	NA	NA	PTB	UK	NA	NA	NA	Whole Blood	Negative	NA	NA	NA	NA	NA	NA	NA	NA	NA	NA	NA	NA	NA	NA	-1.16445	NA	NA	NA	NA	NA	NA	NA	NA	NA	NA	NA	NA	NA	NA	NA	NA	NA	NA	NA	NA	NA	NA	NA
GSE29536	GSM731208	NA	NA	NA	PTB	UK	NA	NA	NA	Whole Blood	Negative	NA	NA	NA	NA	NA	NA	NA	NA	NA	NA	NA	NA	NA	NA	-0.947901	NA	NA	NA	NA	NA	NA	NA	NA	NA	NA	NA	NA	NA	NA	NA	NA	NA	NA	NA	NA	NA	NA	NA
GSE29536	GSM731209	NA	NA	NA	PTB	UK	NA	NA	NA	Whole Blood	Negative	NA	NA	NA	NA	NA	NA	NA	NA	NA	NA	NA	NA	NA	NA	1.81145	NA	NA	NA	NA	NA	NA	NA	NA	NA	NA	NA	NA	NA	NA	NA	NA	NA	NA	NA	NA	NA	NA	NA
GSE29536	GSM731210	NA	NA	NA	PTB	UK	NA	NA	NA	Whole Blood	Negative	NA	NA	NA	NA	NA	NA	NA	NA	NA	NA	NA	NA	NA	NA	1.64146	NA	NA	NA	NA	NA	NA	NA	NA	NA	NA	NA	NA	NA	NA	NA	NA	NA	NA	NA	NA	NA	NA	NA
GSE29536	GSM731211	NA	NA	NA	Control	UK	No	NA	NA	Whole Blood	Negative	NA	NA	NA	NA	NA	NA	NA	NA	NA	NA	NA	NA	NA	NA	-1.11943	NA	NA	NA	NA	NA	NA	NA	NA	NA	NA	NA	NA	NA	NA	NA	NA	NA	NA	NA	NA	NA	NA	NA
GSE29536	GSM731212	NA	NA	NA	PTB	UK	NA	NA	NA	Whole Blood	Negative	NA	NA	NA	NA	NA	NA	NA	NA	NA	NA	NA	NA	NA	NA	-0.480458	NA	NA	NA	NA	NA	NA	NA	NA	NA	NA	NA	NA	NA	NA	NA	NA	NA	NA	NA	NA	NA	NA	NA
GSE29536	GSM731213	NA	NA	NA	Control	UK	No	NA	NA	Whole Blood	Negative	NA	NA	NA	NA	NA	NA	NA	NA	NA	NA	NA	NA	NA	NA	-0.410153	NA	NA	NA	NA	NA	NA	NA	NA	NA	NA	NA	NA	NA	NA	NA	NA	NA	NA	NA	NA	NA	NA	NA
GSE29536	GSM731214	NA	NA	NA	Control	UK	Yes	NA	NA	Whole Blood	Negative	NA	NA	NA	NA	NA	NA	NA	NA	NA	NA	NA	NA	NA	NA	-0.426994	NA	NA	NA	NA	NA	NA	NA	NA	NA	NA	NA	NA	NA	NA	NA	NA	NA	NA	NA	NA	NA	NA	NA
GSE37250	GSM914353	NA	NA	NA	PTB	Malawi	NA	NA	NA	Whole Blood	Negative	NA	NA	NA	NA	NA	NA	NA	NA	M.tuberculosis	NA	NA	NA	NA	NA	0.142005	NA	NA	NA	NA	NA	NA	NA	NA	NA	NA	5483347021_A	NA	NA	NA	NA	NA	NA	NA	NA	NA	NA	NA	NA
GSE37250	GSM914354	NA	NA	NA	PTB	Malawi	NA	NA	NA	Whole Blood	Negative	NA	NA	NA	NA	NA	NA	NA	NA	M.tuberculosis	NA	NA	NA	NA	NA	0.227245	NA	NA	NA	NA	NA	NA	NA	NA	NA	NA	5483347032_A	NA	NA	NA	NA	NA	NA	NA	NA	NA	NA	NA	NA
GSE37250	GSM914355	NA	NA	NA	PTB	Malawi	NA	NA	NA	Whole Blood	Negative	NA	NA	NA	NA	NA	NA	NA	NA	M.tuberculosis	NA	NA	NA	NA	NA	-0.58381	NA	NA	NA	NA	NA	NA	NA	NA	NA	NA	5483347074_A	NA	NA	NA	NA	NA	NA	NA	NA	NA	NA	NA	NA
GSE37250	GSM914356	NA	NA	NA	PTB	Malawi	NA	NA	NA	Whole Blood	Negative	NA	NA	NA	NA	NA	NA	NA	NA	M.tuberculosis	NA	NA	NA	NA	NA	-0.0487088	NA	NA	NA	NA	NA	NA	NA	NA	NA	NA	5667496022_A	NA	NA	NA	NA	NA	NA	NA	NA	NA	NA	NA	NA
GSE37250	GSM914357	NA	NA	NA	PTB	Malawi	NA	NA	NA	Whole Blood	Negative	NA	NA	NA	NA	NA	NA	NA	NA	M.tuberculosis	NA	NA	NA	NA	NA	0.211642	NA	NA	NA	NA	NA	NA	NA	NA	NA	NA	5667496023_A	NA	NA	NA	NA	NA	NA	NA	NA	NA	NA	NA	NA
GSE37250	GSM914358	NA	NA	NA	PTB	Malawi	NA	NA	NA	Whole Blood	Negative	NA	NA	NA	NA	NA	NA	NA	NA	M.tuberculosis	NA	NA	NA	NA	NA	-0.995005	NA	NA	NA	NA	NA	NA	NA	NA	NA	NA	5666389026_A	NA	NA	NA	NA	NA	NA	NA	NA	NA	NA	NA	NA
GSE37250	GSM914359	NA	NA	NA	PTB	Malawi	NA	NA	NA	Whole Blood	Negative	NA	NA	NA	NA	NA	NA	NA	NA	M.tuberculosis	NA	NA	NA	NA	NA	-0.757913	NA	NA	NA	NA	NA	NA	NA	NA	NA	NA	5667496049_A	NA	NA	NA	NA	NA	NA	NA	NA	NA	NA	NA	NA
GSE37250	GSM914360	NA	NA	NA	PTB	Malawi	NA	NA	NA	Whole Blood	Negative	NA	NA	NA	NA	NA	NA	NA	NA	M.tuberculosis	NA	NA	NA	NA	NA	-0.119365	NA	NA	NA	NA	NA	NA	NA	NA	NA	NA	5667496050_A	NA	NA	NA	NA	NA	NA	NA	NA	NA	NA	NA	NA
GSE37250	GSM914361	NA	NA	NA	PTB	Malawi	NA	NA	NA	Whole Blood	Negative	NA	NA	NA	NA	NA	NA	NA	NA	M.tuberculosis	NA	NA	NA	NA	NA	1.03837	NA	NA	NA	NA	NA	NA	NA	NA	NA	NA	5667496051_A	NA	NA	NA	NA	NA	NA	NA	NA	NA	NA	NA	NA
GSE37250	GSM914362	NA	NA	NA	PTB	Malawi	NA	NA	NA	Whole Blood	Negative	NA	NA	NA	NA	NA	NA	NA	NA	M.tuberculosis	NA	NA	NA	NA	NA	-1.62228	NA	NA	NA	NA	NA	NA	NA	NA	NA	NA	5667496058_A	NA	NA	NA	NA	NA	NA	NA	NA	NA	NA	NA	NA
GSE37250	GSM914363	NA	NA	NA	PTB	Malawi	NA	NA	NA	Whole Blood	Negative	NA	NA	NA	NA	NA	NA	NA	NA	M.tuberculosis	NA	NA	NA	NA	NA	1.46474	NA	NA	NA	NA	NA	NA	NA	NA	NA	NA	5667664016_A	NA	NA	NA	NA	NA	NA	NA	NA	NA	NA	NA	NA
GSE37250	GSM914364	NA	NA	NA	PTB	Malawi	NA	NA	NA	Whole Blood	Negative	NA	NA	NA	NA	NA	NA	NA	NA	M.tuberculosis	NA	NA	NA	NA	NA	-0.283811	NA	NA	NA	NA	NA	NA	NA	NA	NA	NA	5667664017_A	NA	NA	NA	NA	NA	NA	NA	NA	NA	NA	NA	NA
GSE37250	GSM914365	NA	NA	NA	PTB	Malawi	NA	NA	NA	Whole Blood	Negative	NA	NA	NA	NA	NA	NA	NA	NA	M.tuberculosis	NA	NA	NA	NA	NA	-1.34012	NA	NA	NA	NA	NA	NA	NA	NA	NA	NA	5667664030_A	NA	NA	NA	NA	NA	NA	NA	NA	NA	NA	NA	NA
GSE37250	GSM914366	NA	NA	NA	PTB	Malawi	NA	NA	NA	Whole Blood	Negative	NA	NA	NA	NA	NA	NA	NA	NA	M.tuberculosis	NA	NA	NA	NA	NA	-0.603947	NA	NA	NA	NA	NA	NA	NA	NA	NA	NA	5667664049_A	NA	NA	NA	NA	NA	NA	NA	NA	NA	NA	NA	NA
GSE37250	GSM914367	NA	NA	NA	PTB	Malawi	NA	NA	NA	Whole Blood	Negative	NA	NA	NA	NA	NA	NA	NA	NA	M.tuberculosis	NA	NA	NA	NA	NA	0.14336	NA	NA	NA	NA	NA	NA	NA	NA	NA	NA	5667664050_A	NA	NA	NA	NA	NA	NA	NA	NA	NA	NA	NA	NA
GSE37250	GSM914368	NA	NA	NA	PTB	Malawi	NA	NA	NA	Whole Blood	Negative	NA	NA	NA	NA	NA	NA	NA	NA	M.tuberculosis	NA	NA	NA	NA	NA	0.83661	NA	NA	NA	NA	NA	NA	NA	NA	NA	NA	5667664060_A	NA	NA	NA	NA	NA	NA	NA	NA	NA	NA	NA	NA
GSE37250	GSM914369	NA	NA	NA	PTB	Malawi	NA	NA	NA	Whole Blood	Negative	NA	NA	NA	NA	NA	NA	NA	NA	M.tuberculosis	NA	NA	NA	NA	NA	0.962085	NA	NA	NA	NA	NA	NA	NA	NA	NA	NA	5685459018_A	NA	NA	NA	NA	NA	NA	NA	NA	NA	NA	NA	NA
GSE37250	GSM914370	NA	NA	NA	PTB	Malawi	NA	NA	NA	Whole Blood	Negative	NA	NA	NA	NA	NA	NA	NA	NA	M.tuberculosis	NA	NA	NA	NA	NA	-0.0942824	NA	NA	NA	NA	NA	NA	NA	NA	NA	NA	5685459032_A	NA	NA	NA	NA	NA	NA	NA	NA	NA	NA	NA	NA
GSE37250	GSM914371	NA	NA	NA	PTB	Malawi	NA	NA	NA	Whole Blood	Negative	NA	NA	NA	NA	NA	NA	NA	NA	M.tuberculosis	NA	NA	NA	NA	NA	0.464511	NA	NA	NA	NA	NA	NA	NA	NA	NA	NA	5685459017_A	NA	NA	NA	NA	NA	NA	NA	NA	NA	NA	NA	NA
GSE37250	GSM914372	NA	NA	NA	PTB	Malawi	NA	NA	NA	Whole Blood	Negative	NA	NA	NA	NA	NA	NA	NA	NA	M.tuberculosis	NA	NA	NA	NA	NA	-0.76497	NA	NA	NA	NA	NA	NA	NA	NA	NA	NA	5685459031_A	NA	NA	NA	NA	NA	NA	NA	NA	NA	NA	NA	NA
GSE37250	GSM914373	NA	NA	NA	PTB	Malawi	NA	NA	NA	Whole Blood	Negative	NA	NA	NA	NA	NA	NA	NA	NA	M.tuberculosis	NA	NA	NA	NA	NA	0.189094	NA	NA	NA	NA	NA	NA	NA	NA	NA	NA	5668448034_A	NA	NA	NA	NA	NA	NA	NA	NA	NA	NA	NA	NA
GSE37250	GSM914374	NA	NA	NA	PTB	Malawi	NA	NA	NA	Whole Blood	Negative	NA	NA	NA	NA	NA	NA	NA	NA	M.tuberculosis	NA	NA	NA	NA	NA	-0.701601	NA	NA	NA	NA	NA	NA	NA	NA	NA	NA	5668448049_A	NA	NA	NA	NA	NA	NA	NA	NA	NA	NA	NA	NA
GSE37250	GSM914375	NA	NA	NA	PTB	Malawi	NA	NA	NA	Whole Blood	Negative	NA	NA	NA	NA	NA	NA	NA	NA	M.tuberculosis	NA	NA	NA	NA	NA	0.0450497	NA	NA	NA	NA	NA	NA	NA	NA	NA	NA	5668448053_A	NA	NA	NA	NA	NA	NA	NA	NA	NA	NA	NA	NA
GSE37250	GSM914376	NA	NA	NA	PTB	Malawi	NA	NA	NA	Whole Blood	Negative	NA	NA	NA	NA	NA	NA	NA	NA	M.tuberculosis	NA	NA	NA	NA	NA	0.811428	NA	NA	NA	NA	NA	NA	NA	NA	NA	NA	5668448052_A	NA	NA	NA	NA	NA	NA	NA	NA	NA	NA	NA	NA
GSE37250	GSM914377	NA	NA	NA	PTB	Malawi	NA	NA	NA	Whole Blood	Negative	NA	NA	NA	NA	NA	NA	NA	NA	M.tuberculosis	NA	NA	NA	NA	NA	0.133851	NA	NA	NA	NA	NA	NA	NA	NA	NA	NA	5685521032_A	NA	NA	NA	NA	NA	NA	NA	NA	NA	NA	NA	NA
GSE37250	GSM914378	NA	NA	NA	PTB	Malawi	NA	NA	NA	Whole Blood	Negative	NA	NA	NA	NA	NA	NA	NA	NA	M.tuberculosis	NA	NA	NA	NA	NA	0.341198	NA	NA	NA	NA	NA	NA	NA	NA	NA	NA	5685521033_A	NA	NA	NA	NA	NA	NA	NA	NA	NA	NA	NA	NA
GSE37250	GSM914379	NA	NA	NA	PTB	Malawi	NA	NA	NA	Whole Blood	Negative	NA	NA	NA	NA	NA	NA	NA	NA	M.tuberculosis	NA	NA	NA	NA	NA	0.729803	NA	NA	NA	NA	NA	NA	NA	NA	NA	NA	5668448025_A	NA	NA	NA	NA	NA	NA	NA	NA	NA	NA	NA	NA
GSE37250	GSM914380	NA	NA	NA	PTB	Malawi	NA	NA	NA	Whole Blood	Negative	NA	NA	NA	NA	NA	NA	NA	NA	M.tuberculosis	NA	NA	NA	NA	NA	-0.180682	NA	NA	NA	NA	NA	NA	NA	NA	NA	NA	5668448026_A	NA	NA	NA	NA	NA	NA	NA	NA	NA	NA	NA	NA
GSE37250	GSM914381	NA	NA	NA	PTB	Malawi	NA	NA	NA	Whole Blood	Negative	NA	NA	NA	NA	NA	NA	NA	NA	M.tuberculosis	NA	NA	NA	NA	NA	0.407017	NA	NA	NA	NA	NA	NA	NA	NA	NA	NA	5668448027_A	NA	NA	NA	NA	NA	NA	NA	NA	NA	NA	NA	NA
GSE37250	GSM914382	NA	NA	NA	PTB	Malawi	NA	NA	NA	Whole Blood	Negative	NA	NA	NA	NA	NA	NA	NA	NA	M.tuberculosis	NA	NA	NA	NA	NA	-0.50427	NA	NA	NA	NA	NA	NA	NA	NA	NA	NA	5668448030_A	NA	NA	NA	NA	NA	NA	NA	NA	NA	NA	NA	NA
GSE37250	GSM914383	NA	NA	NA	PTB	Malawi	NA	NA	NA	Whole Blood	Negative	NA	NA	NA	NA	NA	NA	NA	NA	M.tuberculosis	NA	NA	NA	NA	NA	-0.135864	NA	NA	NA	NA	NA	NA	NA	NA	NA	NA	5668448033_A	NA	NA	NA	NA	NA	NA	NA	NA	NA	NA	NA	NA
GSE37250	GSM914384	NA	NA	NA	PTB	Malawi	NA	NA	NA	Whole Blood	Negative	NA	NA	NA	NA	NA	NA	NA	NA	M.tuberculosis	NA	NA	NA	NA	NA	-0.197185	NA	NA	NA	NA	NA	NA	NA	NA	NA	NA	5685459014_A	NA	NA	NA	NA	NA	NA	NA	NA	NA	NA	NA	NA
GSE37250	GSM914385	NA	NA	NA	PTB	Malawi	NA	NA	NA	Whole Blood	Negative	NA	NA	NA	NA	NA	NA	NA	NA	M.tuberculosis	NA	NA	NA	NA	NA	0.770978	NA	NA	NA	NA	NA	NA	NA	NA	NA	NA	5685459078_A	NA	NA	NA	NA	NA	NA	NA	NA	NA	NA	NA	NA
GSE37250	GSM914386	NA	NA	NA	PTB	Malawi	NA	NA	NA	Whole Blood	Negative	NA	NA	NA	NA	NA	NA	NA	NA	M.tuberculosis	NA	NA	NA	NA	NA	0.452535	NA	NA	NA	NA	NA	NA	NA	NA	NA	NA	5667664051_A	NA	NA	NA	NA	NA	NA	NA	NA	NA	NA	NA	NA
GSE37250	GSM914387	NA	NA	NA	PTB	Malawi	NA	NA	NA	Whole Blood	Negative	NA	NA	NA	NA	NA	NA	NA	NA	M.tuberculosis	NA	NA	NA	NA	NA	-1.77923	NA	NA	NA	NA	NA	NA	NA	NA	NA	NA	5667664047_A	NA	NA	NA	NA	NA	NA	NA	NA	NA	NA	NA	NA
GSE37250	GSM914388	NA	NA	NA	PTB	Malawi	NA	NA	NA	Whole Blood	Negative	NA	NA	NA	NA	NA	NA	NA	NA	M.tuberculosis	NA	NA	NA	NA	NA	0.116329	NA	NA	NA	NA	NA	NA	NA	NA	NA	NA	5666389010_A	NA	NA	NA	NA	NA	NA	NA	NA	NA	NA	NA	NA
GSE37250	GSM914389	NA	NA	NA	PTB	Malawi	NA	NA	NA	Whole Blood	Negative	NA	NA	NA	NA	NA	NA	NA	NA	M.tuberculosis	NA	NA	NA	NA	NA	-0.384311	NA	NA	NA	NA	NA	NA	NA	NA	NA	NA	5666389011_A	NA	NA	NA	NA	NA	NA	NA	NA	NA	NA	NA	NA
GSE37250	GSM914390	NA	NA	NA	PTB	Malawi	NA	NA	NA	Whole Blood	Negative	NA	NA	NA	NA	NA	NA	NA	NA	M.tuberculosis	NA	NA	NA	NA	NA	0.452423	NA	NA	NA	NA	NA	NA	NA	NA	NA	NA	5666389022_A	NA	NA	NA	NA	NA	NA	NA	NA	NA	NA	NA	NA
GSE37250	GSM914391	NA	NA	NA	PTB	Malawi	NA	NA	NA	Whole Blood	Negative	NA	NA	NA	NA	NA	NA	NA	NA	M.tuberculosis	NA	NA	NA	NA	NA	0.277714	NA	NA	NA	NA	NA	NA	NA	NA	NA	NA	5667664008_A	NA	NA	NA	NA	NA	NA	NA	NA	NA	NA	NA	NA
GSE37250	GSM914392	NA	NA	NA	PTB	Malawi	NA	NA	NA	Whole Blood	Negative	NA	NA	NA	NA	NA	NA	NA	NA	M.tuberculosis	NA	NA	NA	NA	NA	-0.182001	NA	NA	NA	NA	NA	NA	NA	NA	NA	NA	5667664013_A	NA	NA	NA	NA	NA	NA	NA	NA	NA	NA	NA	NA
GSE37250	GSM914393	NA	NA	NA	PTB	Malawi	NA	NA	NA	Whole Blood	Negative	NA	NA	NA	NA	NA	NA	NA	NA	M.tuberculosis	NA	NA	NA	NA	NA	-0.91496	NA	NA	NA	NA	NA	NA	NA	NA	NA	NA	5667664015_A	NA	NA	NA	NA	NA	NA	NA	NA	NA	NA	NA	NA
GSE37250	GSM914394	NA	NA	NA	PTB	Malawi	NA	NA	NA	Whole Blood	Negative	NA	NA	NA	NA	NA	NA	NA	NA	M.tuberculosis	NA	NA	NA	NA	NA	0.0733487	NA	NA	NA	NA	NA	NA	NA	NA	NA	NA	5667664022_A	NA	NA	NA	NA	NA	NA	NA	NA	NA	NA	NA	NA
GSE37250	GSM914395	NA	NA	NA	PTB	Malawi	NA	NA	NA	Whole Blood	Negative	NA	NA	NA	NA	NA	NA	NA	NA	M.tuberculosis	NA	NA	NA	NA	NA	-0.436016	NA	NA	NA	NA	NA	NA	NA	NA	NA	NA	5667664028_A	NA	NA	NA	NA	NA	NA	NA	NA	NA	NA	NA	NA
GSE37250	GSM914396	NA	NA	NA	PTB	Malawi	NA	NA	NA	Whole Blood	Negative	NA	NA	NA	NA	NA	NA	NA	NA	M.tuberculosis	NA	NA	NA	NA	NA	0.954715	NA	NA	NA	NA	NA	NA	NA	NA	NA	NA	5667664032_A	NA	NA	NA	NA	NA	NA	NA	NA	NA	NA	NA	NA
GSE37250	GSM914397	NA	NA	NA	PTB	Malawi	NA	NA	NA	Whole Blood	Negative	NA	NA	NA	NA	NA	NA	NA	NA	M.tuberculosis	NA	NA	NA	NA	NA	-1.30729	NA	NA	NA	NA	NA	NA	NA	NA	NA	NA	5667664033_A	NA	NA	NA	NA	NA	NA	NA	NA	NA	NA	NA	NA
GSE37250	GSM914398	NA	NA	NA	PTB	Malawi	NA	NA	NA	Whole Blood	Negative	NA	NA	NA	NA	NA	NA	NA	NA	M.tuberculosis	NA	NA	NA	NA	NA	-0.472474	NA	NA	NA	NA	NA	NA	NA	NA	NA	NA	5667664040_A	NA	NA	NA	NA	NA	NA	NA	NA	NA	NA	NA	NA
GSE37250	GSM914399	NA	NA	NA	PTB	Malawi	NA	NA	NA	Whole Blood	Negative	NA	NA	NA	NA	NA	NA	NA	NA	M.tuberculosis	NA	NA	NA	NA	NA	0.59306	NA	NA	NA	NA	NA	NA	NA	NA	NA	NA	5667664043_A	NA	NA	NA	NA	NA	NA	NA	NA	NA	NA	NA	NA
GSE37250	GSM914400	NA	NA	NA	PTB	Malawi	NA	NA	NA	Whole Blood	Negative	NA	NA	NA	NA	NA	NA	NA	NA	M.tuberculosis	NA	NA	NA	NA	NA	0.720198	NA	NA	NA	NA	NA	NA	NA	NA	NA	NA	5668448031_A	NA	NA	NA	NA	NA	NA	NA	NA	NA	NA	NA	NA
GSE37250	GSM914401	NA	NA	NA	PTB	Malawi	NA	NA	NA	Whole Blood	Negative	NA	NA	NA	NA	NA	NA	NA	NA	M.tuberculosis	NA	NA	NA	NA	NA	-0.747804	NA	NA	NA	NA	NA	NA	NA	NA	NA	NA	5685459033_A	NA	NA	NA	NA	NA	NA	NA	NA	NA	NA	NA	NA
GSE37250	GSM914402	NA	NA	NA	PTB	Malawi	NA	NA	NA	Whole Blood	Negative	NA	NA	NA	NA	NA	NA	NA	NA	M.tuberculosis	NA	NA	NA	NA	NA	-0.720887	NA	NA	NA	NA	NA	NA	NA	NA	NA	NA	5685459039_A	NA	NA	NA	NA	NA	NA	NA	NA	NA	NA	NA	NA
GSE37250	GSM914403	NA	NA	NA	PTB	Malawi	NA	NA	NA	Whole Blood	Negative	NA	NA	NA	NA	NA	NA	NA	NA	M.tuberculosis	NA	NA	NA	NA	NA	0.566512	NA	NA	NA	NA	NA	NA	NA	NA	NA	NA	5667664018_A	NA	NA	NA	NA	NA	NA	NA	NA	NA	NA	NA	NA
GSE37250	GSM914404	NA	NA	NA	PTB	South Africa	NA	NA	NA	Whole Blood	Negative	NA	NA	NA	NA	NA	NA	NA	NA	M.tuberculosis	NA	NA	NA	NA	NA	0.395899	NA	NA	NA	NA	NA	NA	NA	NA	NA	NA	5483347021_B	NA	NA	NA	NA	NA	NA	NA	NA	NA	NA	NA	NA
GSE37250	GSM914405	NA	NA	NA	PTB	South Africa	NA	NA	NA	Whole Blood	Negative	NA	NA	NA	NA	NA	NA	NA	NA	M.tuberculosis	NA	NA	NA	NA	NA	0.00998449	NA	NA	NA	NA	NA	NA	NA	NA	NA	NA	5483347032_B	NA	NA	NA	NA	NA	NA	NA	NA	NA	NA	NA	NA
GSE37250	GSM914406	NA	NA	NA	PTB	South Africa	NA	NA	NA	Whole Blood	Negative	NA	NA	NA	NA	NA	NA	NA	NA	M.tuberculosis	NA	NA	NA	NA	NA	0.659901	NA	NA	NA	NA	NA	NA	NA	NA	NA	NA	5483347074_B	NA	NA	NA	NA	NA	NA	NA	NA	NA	NA	NA	NA
GSE37250	GSM914407	NA	NA	NA	PTB	South Africa	NA	NA	NA	Whole Blood	Negative	NA	NA	NA	NA	NA	NA	NA	NA	M.tuberculosis	NA	NA	NA	NA	NA	0.141822	NA	NA	NA	NA	NA	NA	NA	NA	NA	NA	5667496022_B	NA	NA	NA	NA	NA	NA	NA	NA	NA	NA	NA	NA
GSE37250	GSM914408	NA	NA	NA	PTB	South Africa	NA	NA	NA	Whole Blood	Negative	NA	NA	NA	NA	NA	NA	NA	NA	M.tuberculosis	NA	NA	NA	NA	NA	0.178356	NA	NA	NA	NA	NA	NA	NA	NA	NA	NA	5667496023_B	NA	NA	NA	NA	NA	NA	NA	NA	NA	NA	NA	NA
GSE37250	GSM914409	NA	NA	NA	PTB	South Africa	NA	NA	NA	Whole Blood	Negative	NA	NA	NA	NA	NA	NA	NA	NA	M.tuberculosis	NA	NA	NA	NA	NA	0.782801	NA	NA	NA	NA	NA	NA	NA	NA	NA	NA	5666389026_B	NA	NA	NA	NA	NA	NA	NA	NA	NA	NA	NA	NA
GSE37250	GSM914410	NA	NA	NA	PTB	South Africa	NA	NA	NA	Whole Blood	Negative	NA	NA	NA	NA	NA	NA	NA	NA	M.tuberculosis	NA	NA	NA	NA	NA	0.196099	NA	NA	NA	NA	NA	NA	NA	NA	NA	NA	5667496049_B	NA	NA	NA	NA	NA	NA	NA	NA	NA	NA	NA	NA
GSE37250	GSM914411	NA	NA	NA	PTB	South Africa	NA	NA	NA	Whole Blood	Negative	NA	NA	NA	NA	NA	NA	NA	NA	M.tuberculosis	NA	NA	NA	NA	NA	1.64647	NA	NA	NA	NA	NA	NA	NA	NA	NA	NA	5667496050_B	NA	NA	NA	NA	NA	NA	NA	NA	NA	NA	NA	NA
GSE37250	GSM914412	NA	NA	NA	PTB	South Africa	NA	NA	NA	Whole Blood	Negative	NA	NA	NA	NA	NA	NA	NA	NA	M.tuberculosis	NA	NA	NA	NA	NA	1.41887	NA	NA	NA	NA	NA	NA	NA	NA	NA	NA	5667496051_B	NA	NA	NA	NA	NA	NA	NA	NA	NA	NA	NA	NA
GSE37250	GSM914413	NA	NA	NA	PTB	South Africa	NA	NA	NA	Whole Blood	Negative	NA	NA	NA	NA	NA	NA	NA	NA	M.tuberculosis	NA	NA	NA	NA	NA	0.293177	NA	NA	NA	NA	NA	NA	NA	NA	NA	NA	5667496058_B	NA	NA	NA	NA	NA	NA	NA	NA	NA	NA	NA	NA
GSE37250	GSM914414	NA	NA	NA	PTB	South Africa	NA	NA	NA	Whole Blood	Negative	NA	NA	NA	NA	NA	NA	NA	NA	M.tuberculosis	NA	NA	NA	NA	NA	-0.173764	NA	NA	NA	NA	NA	NA	NA	NA	NA	NA	5667664016_B	NA	NA	NA	NA	NA	NA	NA	NA	NA	NA	NA	NA
GSE37250	GSM914415	NA	NA	NA	PTB	South Africa	NA	NA	NA	Whole Blood	Negative	NA	NA	NA	NA	NA	NA	NA	NA	M.tuberculosis	NA	NA	NA	NA	NA	0.35481	NA	NA	NA	NA	NA	NA	NA	NA	NA	NA	5667664017_B	NA	NA	NA	NA	NA	NA	NA	NA	NA	NA	NA	NA
GSE37250	GSM914416	NA	NA	NA	PTB	South Africa	NA	NA	NA	Whole Blood	Negative	NA	NA	NA	NA	NA	NA	NA	NA	M.tuberculosis	NA	NA	NA	NA	NA	0.0546977	NA	NA	NA	NA	NA	NA	NA	NA	NA	NA	5667664030_B	NA	NA	NA	NA	NA	NA	NA	NA	NA	NA	NA	NA
GSE37250	GSM914417	NA	NA	NA	PTB	South Africa	NA	NA	NA	Whole Blood	Negative	NA	NA	NA	NA	NA	NA	NA	NA	M.tuberculosis	NA	NA	NA	NA	NA	-1.86806	NA	NA	NA	NA	NA	NA	NA	NA	NA	NA	5667664049_B	NA	NA	NA	NA	NA	NA	NA	NA	NA	NA	NA	NA
GSE37250	GSM914418	NA	NA	NA	PTB	South Africa	NA	NA	NA	Whole Blood	Negative	NA	NA	NA	NA	NA	NA	NA	NA	M.tuberculosis	NA	NA	NA	NA	NA	2.13841	NA	NA	NA	NA	NA	NA	NA	NA	NA	NA	5667664050_B	NA	NA	NA	NA	NA	NA	NA	NA	NA	NA	NA	NA
GSE37250	GSM914419	NA	NA	NA	PTB	South Africa	NA	NA	NA	Whole Blood	Negative	NA	NA	NA	NA	NA	NA	NA	NA	M.tuberculosis	NA	NA	NA	NA	NA	2.78796	NA	NA	NA	NA	NA	NA	NA	NA	NA	NA	5667664060_B	NA	NA	NA	NA	NA	NA	NA	NA	NA	NA	NA	NA
GSE37250	GSM914420	NA	NA	NA	PTB	South Africa	NA	NA	NA	Whole Blood	Negative	NA	NA	NA	NA	NA	NA	NA	NA	M.tuberculosis	NA	NA	NA	NA	NA	1.45088	NA	NA	NA	NA	NA	NA	NA	NA	NA	NA	5685459018_B	NA	NA	NA	NA	NA	NA	NA	NA	NA	NA	NA	NA
GSE37250	GSM914421	NA	NA	NA	PTB	South Africa	NA	NA	NA	Whole Blood	Negative	NA	NA	NA	NA	NA	NA	NA	NA	M.tuberculosis	NA	NA	NA	NA	NA	0.498841	NA	NA	NA	NA	NA	NA	NA	NA	NA	NA	5685459032_B	NA	NA	NA	NA	NA	NA	NA	NA	NA	NA	NA	NA
GSE37250	GSM914422	NA	NA	NA	PTB	South Africa	NA	NA	NA	Whole Blood	Negative	NA	NA	NA	NA	NA	NA	NA	NA	M.tuberculosis	NA	NA	NA	NA	NA	-0.0573409	NA	NA	NA	NA	NA	NA	NA	NA	NA	NA	5685459017_B	NA	NA	NA	NA	NA	NA	NA	NA	NA	NA	NA	NA
GSE37250	GSM914423	NA	NA	NA	PTB	South Africa	NA	NA	NA	Whole Blood	Negative	NA	NA	NA	NA	NA	NA	NA	NA	M.tuberculosis	NA	NA	NA	NA	NA	0.738426	NA	NA	NA	NA	NA	NA	NA	NA	NA	NA	5685459031_B	NA	NA	NA	NA	NA	NA	NA	NA	NA	NA	NA	NA
GSE37250	GSM914424	NA	NA	NA	PTB	South Africa	NA	NA	NA	Whole Blood	Negative	NA	NA	NA	NA	NA	NA	NA	NA	M.tuberculosis	NA	NA	NA	NA	NA	1.2072	NA	NA	NA	NA	NA	NA	NA	NA	NA	NA	5668448034_B	NA	NA	NA	NA	NA	NA	NA	NA	NA	NA	NA	NA
GSE37250	GSM914425	NA	NA	NA	PTB	South Africa	NA	NA	NA	Whole Blood	Negative	NA	NA	NA	NA	NA	NA	NA	NA	M.tuberculosis	NA	NA	NA	NA	NA	1.64896	NA	NA	NA	NA	NA	NA	NA	NA	NA	NA	5668448049_B	NA	NA	NA	NA	NA	NA	NA	NA	NA	NA	NA	NA
GSE37250	GSM914426	NA	NA	NA	PTB	South Africa	NA	NA	NA	Whole Blood	Negative	NA	NA	NA	NA	NA	NA	NA	NA	M.tuberculosis	NA	NA	NA	NA	NA	0.729542	NA	NA	NA	NA	NA	NA	NA	NA	NA	NA	5668448053_B	NA	NA	NA	NA	NA	NA	NA	NA	NA	NA	NA	NA
GSE37250	GSM914427	NA	NA	NA	PTB	South Africa	NA	NA	NA	Whole Blood	Negative	NA	NA	NA	NA	NA	NA	NA	NA	M.tuberculosis	NA	NA	NA	NA	NA	1.19281	NA	NA	NA	NA	NA	NA	NA	NA	NA	NA	5668448052_B	NA	NA	NA	NA	NA	NA	NA	NA	NA	NA	NA	NA
GSE37250	GSM914428	NA	NA	NA	PTB	South Africa	NA	NA	NA	Whole Blood	Negative	NA	NA	NA	NA	NA	NA	NA	NA	M.tuberculosis	NA	NA	NA	NA	NA	0.74166	NA	NA	NA	NA	NA	NA	NA	NA	NA	NA	5685521032_B	NA	NA	NA	NA	NA	NA	NA	NA	NA	NA	NA	NA
GSE37250	GSM914429	NA	NA	NA	PTB	South Africa	NA	NA	NA	Whole Blood	Negative	NA	NA	NA	NA	NA	NA	NA	NA	M.tuberculosis	NA	NA	NA	NA	NA	1.07017	NA	NA	NA	NA	NA	NA	NA	NA	NA	NA	5685521033_B	NA	NA	NA	NA	NA	NA	NA	NA	NA	NA	NA	NA
GSE37250	GSM914430	NA	NA	NA	PTB	South Africa	NA	NA	NA	Whole Blood	Negative	NA	NA	NA	NA	NA	NA	NA	NA	M.tuberculosis	NA	NA	NA	NA	NA	0.304211	NA	NA	NA	NA	NA	NA	NA	NA	NA	NA	5668448025_B	NA	NA	NA	NA	NA	NA	NA	NA	NA	NA	NA	NA
GSE37250	GSM914431	NA	NA	NA	PTB	South Africa	NA	NA	NA	Whole Blood	Negative	NA	NA	NA	NA	NA	NA	NA	NA	M.tuberculosis	NA	NA	NA	NA	NA	-0.247378	NA	NA	NA	NA	NA	NA	NA	NA	NA	NA	5668448026_B	NA	NA	NA	NA	NA	NA	NA	NA	NA	NA	NA	NA
GSE37250	GSM914432	NA	NA	NA	PTB	South Africa	NA	NA	NA	Whole Blood	Negative	NA	NA	NA	NA	NA	NA	NA	NA	M.tuberculosis	NA	NA	NA	NA	NA	-0.522244	NA	NA	NA	NA	NA	NA	NA	NA	NA	NA	5668448027_B	NA	NA	NA	NA	NA	NA	NA	NA	NA	NA	NA	NA
GSE37250	GSM914433	NA	NA	NA	PTB	South Africa	NA	NA	NA	Whole Blood	Negative	NA	NA	NA	NA	NA	NA	NA	NA	M.tuberculosis	NA	NA	NA	NA	NA	-0.0829519	NA	NA	NA	NA	NA	NA	NA	NA	NA	NA	5668448030_B	NA	NA	NA	NA	NA	NA	NA	NA	NA	NA	NA	NA
GSE37250	GSM914434	NA	NA	NA	PTB	South Africa	NA	NA	NA	Whole Blood	Negative	NA	NA	NA	NA	NA	NA	NA	NA	M.tuberculosis	NA	NA	NA	NA	NA	-0.199328	NA	NA	NA	NA	NA	NA	NA	NA	NA	NA	5668448033_B	NA	NA	NA	NA	NA	NA	NA	NA	NA	NA	NA	NA
GSE37250	GSM914435	NA	NA	NA	PTB	South Africa	NA	NA	NA	Whole Blood	Negative	NA	NA	NA	NA	NA	NA	NA	NA	M.tuberculosis	NA	NA	NA	NA	NA	1.30472	NA	NA	NA	NA	NA	NA	NA	NA	NA	NA	5685459014_B	NA	NA	NA	NA	NA	NA	NA	NA	NA	NA	NA	NA
GSE37250	GSM914436	NA	NA	NA	PTB	South Africa	NA	NA	NA	Whole Blood	Negative	NA	NA	NA	NA	NA	NA	NA	NA	M.tuberculosis	NA	NA	NA	NA	NA	0.814524	NA	NA	NA	NA	NA	NA	NA	NA	NA	NA	5685459078_B	NA	NA	NA	NA	NA	NA	NA	NA	NA	NA	NA	NA
GSE37250	GSM914437	NA	NA	NA	PTB	South Africa	NA	NA	NA	Whole Blood	Negative	NA	NA	NA	NA	NA	NA	NA	NA	M.tuberculosis	NA	NA	NA	NA	NA	1.16753	NA	NA	NA	NA	NA	NA	NA	NA	NA	NA	5667664051_B	NA	NA	NA	NA	NA	NA	NA	NA	NA	NA	NA	NA
GSE37250	GSM914438	NA	NA	NA	PTB	South Africa	NA	NA	NA	Whole Blood	Negative	NA	NA	NA	NA	NA	NA	NA	NA	M.tuberculosis	NA	NA	NA	NA	NA	1.11039	NA	NA	NA	NA	NA	NA	NA	NA	NA	NA	5667664047_B	NA	NA	NA	NA	NA	NA	NA	NA	NA	NA	NA	NA
GSE37250	GSM914439	NA	NA	NA	PTB	South Africa	NA	NA	NA	Whole Blood	Negative	NA	NA	NA	NA	NA	NA	NA	NA	M.tuberculosis	NA	NA	NA	NA	NA	1.21208	NA	NA	NA	NA	NA	NA	NA	NA	NA	NA	5666389010_B	NA	NA	NA	NA	NA	NA	NA	NA	NA	NA	NA	NA
GSE37250	GSM914440	NA	NA	NA	PTB	South Africa	NA	NA	NA	Whole Blood	Negative	NA	NA	NA	NA	NA	NA	NA	NA	M.tuberculosis	NA	NA	NA	NA	NA	0.333701	NA	NA	NA	NA	NA	NA	NA	NA	NA	NA	5666389011_B	NA	NA	NA	NA	NA	NA	NA	NA	NA	NA	NA	NA
GSE37250	GSM914441	NA	NA	NA	PTB	South Africa	NA	NA	NA	Whole Blood	Negative	NA	NA	NA	NA	NA	NA	NA	NA	M.tuberculosis	NA	NA	NA	NA	NA	0.382265	NA	NA	NA	NA	NA	NA	NA	NA	NA	NA	5666389022_B	NA	NA	NA	NA	NA	NA	NA	NA	NA	NA	NA	NA
GSE37250	GSM914442	NA	NA	NA	PTB	South Africa	NA	NA	NA	Whole Blood	Negative	NA	NA	NA	NA	NA	NA	NA	NA	M.tuberculosis	NA	NA	NA	NA	NA	0.284926	NA	NA	NA	NA	NA	NA	NA	NA	NA	NA	5667664008_B	NA	NA	NA	NA	NA	NA	NA	NA	NA	NA	NA	NA
GSE37250	GSM914443	NA	NA	NA	PTB	South Africa	NA	NA	NA	Whole Blood	Negative	NA	NA	NA	NA	NA	NA	NA	NA	M.tuberculosis	NA	NA	NA	NA	NA	0.418795	NA	NA	NA	NA	NA	NA	NA	NA	NA	NA	5667664013_B	NA	NA	NA	NA	NA	NA	NA	NA	NA	NA	NA	NA
GSE37250	GSM914444	NA	NA	NA	PTB	South Africa	NA	NA	NA	Whole Blood	Negative	NA	NA	NA	NA	NA	NA	NA	NA	M.tuberculosis	NA	NA	NA	NA	NA	0.159381	NA	NA	NA	NA	NA	NA	NA	NA	NA	NA	5667664015_B	NA	NA	NA	NA	NA	NA	NA	NA	NA	NA	NA	NA
GSE37250	GSM914445	NA	NA	NA	PTB	South Africa	NA	NA	NA	Whole Blood	Negative	NA	NA	NA	NA	NA	NA	NA	NA	M.tuberculosis	NA	NA	NA	NA	NA	0.640034	NA	NA	NA	NA	NA	NA	NA	NA	NA	NA	5667664022_B	NA	NA	NA	NA	NA	NA	NA	NA	NA	NA	NA	NA
GSE37250	GSM914446	NA	NA	NA	PTB	South Africa	NA	NA	NA	Whole Blood	Negative	NA	NA	NA	NA	NA	NA	NA	NA	M.tuberculosis	NA	NA	NA	NA	NA	0.0914245	NA	NA	NA	NA	NA	NA	NA	NA	NA	NA	5667664028_B	NA	NA	NA	NA	NA	NA	NA	NA	NA	NA	NA	NA
GSE37250	GSM914447	NA	NA	NA	PTB	South Africa	NA	NA	NA	Whole Blood	Negative	NA	NA	NA	NA	NA	NA	NA	NA	M.tuberculosis	NA	NA	NA	NA	NA	-0.362977	NA	NA	NA	NA	NA	NA	NA	NA	NA	NA	5667664032_B	NA	NA	NA	NA	NA	NA	NA	NA	NA	NA	NA	NA
GSE37250	GSM914448	NA	NA	NA	PTB	South Africa	NA	NA	NA	Whole Blood	Negative	NA	NA	NA	NA	NA	NA	NA	NA	M.tuberculosis	NA	NA	NA	NA	NA	1.6601	NA	NA	NA	NA	NA	NA	NA	NA	NA	NA	5667664033_B	NA	NA	NA	NA	NA	NA	NA	NA	NA	NA	NA	NA
GSE37250	GSM914449	NA	NA	NA	PTB	South Africa	NA	NA	NA	Whole Blood	Negative	NA	NA	NA	NA	NA	NA	NA	NA	M.tuberculosis	NA	NA	NA	NA	NA	0.697238	NA	NA	NA	NA	NA	NA	NA	NA	NA	NA	5667664040_B	NA	NA	NA	NA	NA	NA	NA	NA	NA	NA	NA	NA
GSE37250	GSM914450	NA	NA	NA	PTB	Malawi	NA	NA	NA	Whole Blood	Positive	NA	NA	NA	NA	NA	NA	NA	NA	M.tuberculosis	NA	NA	NA	NA	NA	-0.334479	NA	NA	NA	NA	NA	NA	NA	NA	NA	NA	5483347021_C	NA	NA	NA	NA	NA	NA	NA	NA	NA	NA	NA	NA
GSE37250	GSM914451	NA	NA	NA	PTB	Malawi	NA	NA	NA	Whole Blood	Positive	NA	NA	NA	NA	NA	NA	NA	NA	M.tuberculosis	NA	NA	NA	NA	NA	-0.369803	NA	NA	NA	NA	NA	NA	NA	NA	NA	NA	5483347032_C	NA	NA	NA	NA	NA	NA	NA	NA	NA	NA	NA	NA
GSE37250	GSM914452	NA	NA	NA	PTB	Malawi	NA	NA	NA	Whole Blood	Positive	NA	NA	NA	NA	NA	NA	NA	NA	M.tuberculosis	NA	NA	NA	NA	NA	-0.882265	NA	NA	NA	NA	NA	NA	NA	NA	NA	NA	5483347074_C	NA	NA	NA	NA	NA	NA	NA	NA	NA	NA	NA	NA
GSE37250	GSM914453	NA	NA	NA	PTB	Malawi	NA	NA	NA	Whole Blood	Positive	NA	NA	NA	NA	NA	NA	NA	NA	M.tuberculosis	NA	NA	NA	NA	NA	-1.09122	NA	NA	NA	NA	NA	NA	NA	NA	NA	NA	5666389005_G	NA	NA	NA	NA	NA	NA	NA	NA	NA	NA	NA	NA
GSE37250	GSM914454	NA	NA	NA	PTB	Malawi	NA	NA	NA	Whole Blood	Positive	NA	NA	NA	NA	NA	NA	NA	NA	M.tuberculosis	NA	NA	NA	NA	NA	0.943414	NA	NA	NA	NA	NA	NA	NA	NA	NA	NA	5667496023_C	NA	NA	NA	NA	NA	NA	NA	NA	NA	NA	NA	NA
GSE37250	GSM914455	NA	NA	NA	PTB	Malawi	NA	NA	NA	Whole Blood	Positive	NA	NA	NA	NA	NA	NA	NA	NA	M.tuberculosis	NA	NA	NA	NA	NA	0.66334	NA	NA	NA	NA	NA	NA	NA	NA	NA	NA	5666389026_C	NA	NA	NA	NA	NA	NA	NA	NA	NA	NA	NA	NA
GSE37250	GSM914456	NA	NA	NA	PTB	Malawi	NA	NA	NA	Whole Blood	Positive	NA	NA	NA	NA	NA	NA	NA	NA	M.tuberculosis	NA	NA	NA	NA	NA	-2.49422	NA	NA	NA	NA	NA	NA	NA	NA	NA	NA	5667496049_C	NA	NA	NA	NA	NA	NA	NA	NA	NA	NA	NA	NA
GSE37250	GSM914457	NA	NA	NA	PTB	Malawi	NA	NA	NA	Whole Blood	Positive	NA	NA	NA	NA	NA	NA	NA	NA	M.tuberculosis	NA	NA	NA	NA	NA	-0.494074	NA	NA	NA	NA	NA	NA	NA	NA	NA	NA	5667496050_C	NA	NA	NA	NA	NA	NA	NA	NA	NA	NA	NA	NA
GSE37250	GSM914458	NA	NA	NA	PTB	Malawi	NA	NA	NA	Whole Blood	Positive	NA	NA	NA	NA	NA	NA	NA	NA	M.tuberculosis	NA	NA	NA	NA	NA	0.165356	NA	NA	NA	NA	NA	NA	NA	NA	NA	NA	5667496051_C	NA	NA	NA	NA	NA	NA	NA	NA	NA	NA	NA	NA
GSE37250	GSM914459	NA	NA	NA	PTB	Malawi	NA	NA	NA	Whole Blood	Positive	NA	NA	NA	NA	NA	NA	NA	NA	M.tuberculosis	NA	NA	NA	NA	NA	-0.363273	NA	NA	NA	NA	NA	NA	NA	NA	NA	NA	5667496058_C	NA	NA	NA	NA	NA	NA	NA	NA	NA	NA	NA	NA
GSE37250	GSM914460	NA	NA	NA	PTB	Malawi	NA	NA	NA	Whole Blood	Positive	NA	NA	NA	NA	NA	NA	NA	NA	M.tuberculosis	NA	NA	NA	NA	NA	0.363757	NA	NA	NA	NA	NA	NA	NA	NA	NA	NA	5667664016_C	NA	NA	NA	NA	NA	NA	NA	NA	NA	NA	NA	NA
GSE37250	GSM914461	NA	NA	NA	PTB	Malawi	NA	NA	NA	Whole Blood	Positive	NA	NA	NA	NA	NA	NA	NA	NA	M.tuberculosis	NA	NA	NA	NA	NA	-0.96791	NA	NA	NA	NA	NA	NA	NA	NA	NA	NA	5667664017_C	NA	NA	NA	NA	NA	NA	NA	NA	NA	NA	NA	NA
GSE37250	GSM914462	NA	NA	NA	PTB	Malawi	NA	NA	NA	Whole Blood	Positive	NA	NA	NA	NA	NA	NA	NA	NA	M.tuberculosis	NA	NA	NA	NA	NA	-1.53642	NA	NA	NA	NA	NA	NA	NA	NA	NA	NA	5667664030_C	NA	NA	NA	NA	NA	NA	NA	NA	NA	NA	NA	NA
GSE37250	GSM914463	NA	NA	NA	PTB	Malawi	NA	NA	NA	Whole Blood	Positive	NA	NA	NA	NA	NA	NA	NA	NA	M.tuberculosis	NA	NA	NA	NA	NA	-2.11621	NA	NA	NA	NA	NA	NA	NA	NA	NA	NA	5667664049_C	NA	NA	NA	NA	NA	NA	NA	NA	NA	NA	NA	NA
GSE37250	GSM914464	NA	NA	NA	PTB	Malawi	NA	NA	NA	Whole Blood	Positive	NA	NA	NA	NA	NA	NA	NA	NA	M.tuberculosis	NA	NA	NA	NA	NA	-0.145109	NA	NA	NA	NA	NA	NA	NA	NA	NA	NA	5667664050_C	NA	NA	NA	NA	NA	NA	NA	NA	NA	NA	NA	NA
GSE37250	GSM914465	NA	NA	NA	PTB	Malawi	NA	NA	NA	Whole Blood	Positive	NA	NA	NA	NA	NA	NA	NA	NA	M.tuberculosis	NA	NA	NA	NA	NA	-0.765229	NA	NA	NA	NA	NA	NA	NA	NA	NA	NA	5667664060_C	NA	NA	NA	NA	NA	NA	NA	NA	NA	NA	NA	NA
GSE37250	GSM914466	NA	NA	NA	PTB	Malawi	NA	NA	NA	Whole Blood	Positive	NA	NA	NA	NA	NA	NA	NA	NA	M.tuberculosis	NA	NA	NA	NA	NA	0.886113	NA	NA	NA	NA	NA	NA	NA	NA	NA	NA	5685459018_C	NA	NA	NA	NA	NA	NA	NA	NA	NA	NA	NA	NA
GSE37250	GSM914467	NA	NA	NA	PTB	Malawi	NA	NA	NA	Whole Blood	Positive	NA	NA	NA	NA	NA	NA	NA	NA	M.tuberculosis	NA	NA	NA	NA	NA	0.425294	NA	NA	NA	NA	NA	NA	NA	NA	NA	NA	5685459032_C	NA	NA	NA	NA	NA	NA	NA	NA	NA	NA	NA	NA
GSE37250	GSM914468	NA	NA	NA	PTB	Malawi	NA	NA	NA	Whole Blood	Positive	NA	NA	NA	NA	NA	NA	NA	NA	M.tuberculosis	NA	NA	NA	NA	NA	-1.0504	NA	NA	NA	NA	NA	NA	NA	NA	NA	NA	5685459017_C	NA	NA	NA	NA	NA	NA	NA	NA	NA	NA	NA	NA
GSE37250	GSM914469	NA	NA	NA	PTB	Malawi	NA	NA	NA	Whole Blood	Positive	NA	NA	NA	NA	NA	NA	NA	NA	M.tuberculosis	NA	NA	NA	NA	NA	-1.27217	NA	NA	NA	NA	NA	NA	NA	NA	NA	NA	5685459031_C	NA	NA	NA	NA	NA	NA	NA	NA	NA	NA	NA	NA
GSE37250	GSM914470	NA	NA	NA	PTB	Malawi	NA	NA	NA	Whole Blood	Positive	NA	NA	NA	NA	NA	NA	NA	NA	M.tuberculosis	NA	NA	NA	NA	NA	0.362995	NA	NA	NA	NA	NA	NA	NA	NA	NA	NA	5668448034_C	NA	NA	NA	NA	NA	NA	NA	NA	NA	NA	NA	NA
GSE37250	GSM914471	NA	NA	NA	PTB	Malawi	NA	NA	NA	Whole Blood	Positive	NA	NA	NA	NA	NA	NA	NA	NA	M.tuberculosis	NA	NA	NA	NA	NA	-0.314392	NA	NA	NA	NA	NA	NA	NA	NA	NA	NA	5668448049_C	NA	NA	NA	NA	NA	NA	NA	NA	NA	NA	NA	NA
GSE37250	GSM914472	NA	NA	NA	PTB	Malawi	NA	NA	NA	Whole Blood	Positive	NA	NA	NA	NA	NA	NA	NA	NA	M.tuberculosis	NA	NA	NA	NA	NA	-0.808982	NA	NA	NA	NA	NA	NA	NA	NA	NA	NA	5668448053_C	NA	NA	NA	NA	NA	NA	NA	NA	NA	NA	NA	NA
GSE37250	GSM914473	NA	NA	NA	PTB	Malawi	NA	NA	NA	Whole Blood	Positive	NA	NA	NA	NA	NA	NA	NA	NA	M.tuberculosis	NA	NA	NA	NA	NA	-1.44585	NA	NA	NA	NA	NA	NA	NA	NA	NA	NA	5668448052_C	NA	NA	NA	NA	NA	NA	NA	NA	NA	NA	NA	NA
GSE37250	GSM914474	NA	NA	NA	PTB	Malawi	NA	NA	NA	Whole Blood	Positive	NA	NA	NA	NA	NA	NA	NA	NA	M.tuberculosis	NA	NA	NA	NA	NA	-1.23907	NA	NA	NA	NA	NA	NA	NA	NA	NA	NA	5685521032_C	NA	NA	NA	NA	NA	NA	NA	NA	NA	NA	NA	NA
GSE37250	GSM914475	NA	NA	NA	PTB	Malawi	NA	NA	NA	Whole Blood	Positive	NA	NA	NA	NA	NA	NA	NA	NA	M.tuberculosis	NA	NA	NA	NA	NA	-0.180617	NA	NA	NA	NA	NA	NA	NA	NA	NA	NA	5685521033_C	NA	NA	NA	NA	NA	NA	NA	NA	NA	NA	NA	NA
GSE37250	GSM914476	NA	NA	NA	PTB	Malawi	NA	NA	NA	Whole Blood	Positive	NA	NA	NA	NA	NA	NA	NA	NA	M.tuberculosis	NA	NA	NA	NA	NA	-0.589728	NA	NA	NA	NA	NA	NA	NA	NA	NA	NA	5666389005_E	NA	NA	NA	NA	NA	NA	NA	NA	NA	NA	NA	NA
GSE37250	GSM914477	NA	NA	NA	PTB	Malawi	NA	NA	NA	Whole Blood	Positive	NA	NA	NA	NA	NA	NA	NA	NA	M.tuberculosis	NA	NA	NA	NA	NA	-0.0908968	NA	NA	NA	NA	NA	NA	NA	NA	NA	NA	5668448026_C	NA	NA	NA	NA	NA	NA	NA	NA	NA	NA	NA	NA
GSE37250	GSM914478	NA	NA	NA	PTB	Malawi	NA	NA	NA	Whole Blood	Positive	NA	NA	NA	NA	NA	NA	NA	NA	M.tuberculosis	NA	NA	NA	NA	NA	0.0637516	NA	NA	NA	NA	NA	NA	NA	NA	NA	NA	5668448027_C	NA	NA	NA	NA	NA	NA	NA	NA	NA	NA	NA	NA
GSE37250	GSM914479	NA	NA	NA	PTB	Malawi	NA	NA	NA	Whole Blood	Positive	NA	NA	NA	NA	NA	NA	NA	NA	M.tuberculosis	NA	NA	NA	NA	NA	-1.37081	NA	NA	NA	NA	NA	NA	NA	NA	NA	NA	5668448030_C	NA	NA	NA	NA	NA	NA	NA	NA	NA	NA	NA	NA
GSE37250	GSM914480	NA	NA	NA	PTB	Malawi	NA	NA	NA	Whole Blood	Positive	NA	NA	NA	NA	NA	NA	NA	NA	M.tuberculosis	NA	NA	NA	NA	NA	0.329902	NA	NA	NA	NA	NA	NA	NA	NA	NA	NA	5668448033_C	NA	NA	NA	NA	NA	NA	NA	NA	NA	NA	NA	NA
GSE37250	GSM914481	NA	NA	NA	PTB	Malawi	NA	NA	NA	Whole Blood	Positive	NA	NA	NA	NA	NA	NA	NA	NA	M.tuberculosis	NA	NA	NA	NA	NA	-0.440086	NA	NA	NA	NA	NA	NA	NA	NA	NA	NA	5685459014_C	NA	NA	NA	NA	NA	NA	NA	NA	NA	NA	NA	NA
GSE37250	GSM914482	NA	NA	NA	PTB	Malawi	NA	NA	NA	Whole Blood	Positive	NA	NA	NA	NA	NA	NA	NA	NA	M.tuberculosis	NA	NA	NA	NA	NA	0.962407	NA	NA	NA	NA	NA	NA	NA	NA	NA	NA	5685459078_C	NA	NA	NA	NA	NA	NA	NA	NA	NA	NA	NA	NA
GSE37250	GSM914483	NA	NA	NA	PTB	Malawi	NA	NA	NA	Whole Blood	Positive	NA	NA	NA	NA	NA	NA	NA	NA	M.tuberculosis	NA	NA	NA	NA	NA	0.613281	NA	NA	NA	NA	NA	NA	NA	NA	NA	NA	5667664051_C	NA	NA	NA	NA	NA	NA	NA	NA	NA	NA	NA	NA
GSE37250	GSM914484	NA	NA	NA	PTB	Malawi	NA	NA	NA	Whole Blood	Positive	NA	NA	NA	NA	NA	NA	NA	NA	M.tuberculosis	NA	NA	NA	NA	NA	0.103946	NA	NA	NA	NA	NA	NA	NA	NA	NA	NA	5667664047_C	NA	NA	NA	NA	NA	NA	NA	NA	NA	NA	NA	NA
GSE37250	GSM914485	NA	NA	NA	PTB	Malawi	NA	NA	NA	Whole Blood	Positive	NA	NA	NA	NA	NA	NA	NA	NA	M.tuberculosis	NA	NA	NA	NA	NA	2.20954	NA	NA	NA	NA	NA	NA	NA	NA	NA	NA	5666389010_C	NA	NA	NA	NA	NA	NA	NA	NA	NA	NA	NA	NA
GSE37250	GSM914486	NA	NA	NA	PTB	Malawi	NA	NA	NA	Whole Blood	Positive	NA	NA	NA	NA	NA	NA	NA	NA	M.tuberculosis	NA	NA	NA	NA	NA	1.72339	NA	NA	NA	NA	NA	NA	NA	NA	NA	NA	5666389011_C	NA	NA	NA	NA	NA	NA	NA	NA	NA	NA	NA	NA
GSE37250	GSM914487	NA	NA	NA	PTB	Malawi	NA	NA	NA	Whole Blood	Positive	NA	NA	NA	NA	NA	NA	NA	NA	M.tuberculosis	NA	NA	NA	NA	NA	0.414063	NA	NA	NA	NA	NA	NA	NA	NA	NA	NA	5666389022_C	NA	NA	NA	NA	NA	NA	NA	NA	NA	NA	NA	NA
GSE37250	GSM914488	NA	NA	NA	PTB	Malawi	NA	NA	NA	Whole Blood	Positive	NA	NA	NA	NA	NA	NA	NA	NA	M.tuberculosis	NA	NA	NA	NA	NA	0.00425326	NA	NA	NA	NA	NA	NA	NA	NA	NA	NA	5667664008_C	NA	NA	NA	NA	NA	NA	NA	NA	NA	NA	NA	NA
GSE37250	GSM914489	NA	NA	NA	PTB	Malawi	NA	NA	NA	Whole Blood	Positive	NA	NA	NA	NA	NA	NA	NA	NA	M.tuberculosis	NA	NA	NA	NA	NA	-0.636908	NA	NA	NA	NA	NA	NA	NA	NA	NA	NA	5667664013_C	NA	NA	NA	NA	NA	NA	NA	NA	NA	NA	NA	NA
GSE37250	GSM914490	NA	NA	NA	PTB	Malawi	NA	NA	NA	Whole Blood	Positive	NA	NA	NA	NA	NA	NA	NA	NA	M.tuberculosis	NA	NA	NA	NA	NA	-1.4495	NA	NA	NA	NA	NA	NA	NA	NA	NA	NA	5667664015_C	NA	NA	NA	NA	NA	NA	NA	NA	NA	NA	NA	NA
GSE37250	GSM914491	NA	NA	NA	PTB	Malawi	NA	NA	NA	Whole Blood	Positive	NA	NA	NA	NA	NA	NA	NA	NA	M.tuberculosis	NA	NA	NA	NA	NA	-0.325726	NA	NA	NA	NA	NA	NA	NA	NA	NA	NA	5667664022_C	NA	NA	NA	NA	NA	NA	NA	NA	NA	NA	NA	NA
GSE37250	GSM914492	NA	NA	NA	PTB	Malawi	NA	NA	NA	Whole Blood	Positive	NA	NA	NA	NA	NA	NA	NA	NA	M.tuberculosis	NA	NA	NA	NA	NA	-0.401353	NA	NA	NA	NA	NA	NA	NA	NA	NA	NA	5667664028_C	NA	NA	NA	NA	NA	NA	NA	NA	NA	NA	NA	NA
GSE37250	GSM914493	NA	NA	NA	PTB	Malawi	NA	NA	NA	Whole Blood	Positive	NA	NA	NA	NA	NA	NA	NA	NA	M.tuberculosis	NA	NA	NA	NA	NA	-0.709226	NA	NA	NA	NA	NA	NA	NA	NA	NA	NA	5667664032_C	NA	NA	NA	NA	NA	NA	NA	NA	NA	NA	NA	NA
GSE37250	GSM914494	NA	NA	NA	PTB	Malawi	NA	NA	NA	Whole Blood	Positive	NA	NA	NA	NA	NA	NA	NA	NA	M.tuberculosis	NA	NA	NA	NA	NA	0.383476	NA	NA	NA	NA	NA	NA	NA	NA	NA	NA	5667664033_C	NA	NA	NA	NA	NA	NA	NA	NA	NA	NA	NA	NA
GSE37250	GSM914495	NA	NA	NA	PTB	Malawi	NA	NA	NA	Whole Blood	Positive	NA	NA	NA	NA	NA	NA	NA	NA	M.tuberculosis	NA	NA	NA	NA	NA	-0.482902	NA	NA	NA	NA	NA	NA	NA	NA	NA	NA	5667664040_C	NA	NA	NA	NA	NA	NA	NA	NA	NA	NA	NA	NA
GSE37250	GSM914496	NA	NA	NA	PTB	Malawi	NA	NA	NA	Whole Blood	Positive	NA	NA	NA	NA	NA	NA	NA	NA	M.tuberculosis	NA	NA	NA	NA	NA	2.36475	NA	NA	NA	NA	NA	NA	NA	NA	NA	NA	5667664043_C	NA	NA	NA	NA	NA	NA	NA	NA	NA	NA	NA	NA
GSE37250	GSM914497	NA	NA	NA	PTB	Malawi	NA	NA	NA	Whole Blood	Positive	NA	NA	NA	NA	NA	NA	NA	NA	M.tuberculosis	NA	NA	NA	NA	NA	-0.0499471	NA	NA	NA	NA	NA	NA	NA	NA	NA	NA	5668448031_C	NA	NA	NA	NA	NA	NA	NA	NA	NA	NA	NA	NA
GSE37250	GSM914498	NA	NA	NA	PTB	Malawi	NA	NA	NA	Whole Blood	Positive	NA	NA	NA	NA	NA	NA	NA	NA	M.tuberculosis	NA	NA	NA	NA	NA	-0.521614	NA	NA	NA	NA	NA	NA	NA	NA	NA	NA	5685459033_C	NA	NA	NA	NA	NA	NA	NA	NA	NA	NA	NA	NA
GSE37250	GSM914499	NA	NA	NA	PTB	Malawi	NA	NA	NA	Whole Blood	Positive	NA	NA	NA	NA	NA	NA	NA	NA	M.tuberculosis	NA	NA	NA	NA	NA	-0.426384	NA	NA	NA	NA	NA	NA	NA	NA	NA	NA	5685459039_C	NA	NA	NA	NA	NA	NA	NA	NA	NA	NA	NA	NA
GSE37250	GSM914500	NA	NA	NA	PTB	Malawi	NA	NA	NA	Whole Blood	Positive	NA	NA	NA	NA	NA	NA	NA	NA	M.tuberculosis	NA	NA	NA	NA	NA	-0.421322	NA	NA	NA	NA	NA	NA	NA	NA	NA	NA	5667664018_C	NA	NA	NA	NA	NA	NA	NA	NA	NA	NA	NA	NA
GSE37250	GSM914501	NA	NA	NA	PTB	South Africa	NA	NA	NA	Whole Blood	Positive	NA	NA	NA	NA	NA	NA	NA	NA	M.tuberculosis	NA	NA	NA	NA	NA	0.175056	NA	NA	NA	NA	NA	NA	NA	NA	NA	NA	5483347021_D	NA	NA	NA	NA	NA	NA	NA	NA	NA	NA	NA	NA
GSE37250	GSM914502	NA	NA	NA	PTB	South Africa	NA	NA	NA	Whole Blood	Positive	NA	NA	NA	NA	NA	NA	NA	NA	M.tuberculosis	NA	NA	NA	NA	NA	0.186358	NA	NA	NA	NA	NA	NA	NA	NA	NA	NA	5483347032_D	NA	NA	NA	NA	NA	NA	NA	NA	NA	NA	NA	NA
GSE37250	GSM914503	NA	NA	NA	PTB	South Africa	NA	NA	NA	Whole Blood	Positive	NA	NA	NA	NA	NA	NA	NA	NA	M.tuberculosis	NA	NA	NA	NA	NA	0.671849	NA	NA	NA	NA	NA	NA	NA	NA	NA	NA	5483347074_D	NA	NA	NA	NA	NA	NA	NA	NA	NA	NA	NA	NA
[truncated: 3,384 more rows]
[truncated: 7 more columns]
