# Supplementary material
Source: publisher site journal article supplement (doi:10.18632/aging.206048)
Supplement: Supplementary file 2 [file aging-v16-206048-supplementary-material-SD3.xlsx]

## Sheet: Sheet 1
Supplementary Table 2. List of NET-related genes obtained from public literature.
hgnc_symbol	ensembl_gene_id	chromosome_name	start_position	end_position	description
AKT1	ENSG00000142208	14	104769349	104795751	AKT serine/threonine kinase 1 [Source:HGNC Symbol;Acc:HGNC:391]
AKT2	ENSG00000105221	19	40230317	40285536	AKT serine/threonine kinase 2 [Source:HGNC Symbol;Acc:HGNC:392]
ALPL	ENSG00000162551	1	21509397	21578410	alkaline phosphatase, biomineralization associated [Source:HGNC Symbol;Acc:HGNC:438]
ATG7	ENSG00000197548	3	11272309	11557665	autophagy related 7 [Source:HGNC Symbol;Acc:HGNC:16935]
BST1	ENSG00000109743	4	15703065	15738313	bone marrow stromal cell antigen 1 [Source:HGNC Symbol;Acc:HGNC:1118]
CD93	ENSG00000125810	20	23079360	23086324	CD93 molecule [Source:HGNC Symbol;Acc:HGNC:15855]
CEACAM3	ENSG00000170956	19	41796587	41811554	CEA cell adhesion molecule 3 [Source:HGNC Symbol;Acc:HGNC:1815]
CLEC6A	ENSG00000205846	12	8455962	8478330	C-type lectin domain containing 6A [Source:HGNC Symbol;Acc:HGNC:14556]
CPPED1	ENSG00000103381	16	12659799	12803887	calcineurin like phosphoesterase domain containing 1 [Source:HGNC Symbol;Acc:HGNC:25632]
CREB5	ENSG00000146592	7	28299321	28825894	cAMP responsive element binding protein 5 [Source:HGNC Symbol;Acc:HGNC:16844]
CRISPLD2	ENSG00000103196	16	84819985	84920768	cysteine rich secretory protein LCCL domain containing 2 [Source:HGNC Symbol;Acc:HGNC:25248]
CSF3	ENSG00000108342	17	40015361	40017813	colony stimulating factor 3 [Source:HGNC Symbol;Acc:HGNC:2438]
CSF3R	ENSG00000119535	1	36466043	36483278	colony stimulating factor 3 receptor [Source:HGNC Symbol;Acc:HGNC:2439]
CTSG	ENSG00000100448	14	24573518	24576250	cathepsin G [Source:HGNC Symbol;Acc:HGNC:2532]
CXCL8	ENSG00000169429	4	73740519	73743716	C-X-C motif chemokine ligand 8 [Source:HGNC Symbol;Acc:HGNC:6025]
CXCR1	ENSG00000163464	2	218162841	218166962	C-X-C motif chemokine receptor 1 [Source:HGNC Symbol;Acc:HGNC:6026]
CXCR2	ENSG00000180871	2	218125289	218137251	C-X-C motif chemokine receptor 2 [Source:HGNC Symbol;Acc:HGNC:6027]
CYBB	ENSG00000165168	X	37780018	37813461	cytochrome b-245 beta chain [Source:HGNC Symbol;Acc:HGNC:2578]
CYP4F3	ENSG00000186529	19	15640897	15662825	cytochrome P450 family 4 subfamily F member 3 [Source:HGNC Symbol;Acc:HGNC:2646]
DNASE1	ENSG00000213918	16	3611728	3680143	deoxyribonuclease 1 [Source:HGNC Symbol;Acc:HGNC:2956]
DYSF	ENSG00000135636	2	71453561	71686763	dysferlin [Source:HGNC Symbol;Acc:HGNC:3097]
ELANE	ENSG00000197561	19	851014	856247	elastase, neutrophil expressed [Source:HGNC Symbol;Acc:HGNC:3309]
ENTPD4	ENSG00000197217	8	23385783	23457695	ectonucleoside triphosphate diphosphohydrolase 4 [Source:HGNC Symbol;Acc:HGNC:14573]
F3	ENSG00000117525	1	94529173	94541759	coagulation factor III, tissue factor [Source:HGNC Symbol;Acc:HGNC:3541]
FCAR	ENSG00000186431	19	54874235	54891420	Fc alpha receptor [Source:HGNC Symbol;Acc:HGNC:3608]
FCGR3B	ENSG00000162747	1	161623196	161631963	Fc gamma receptor IIIb [Source:HGNC Symbol;Acc:HGNC:3620]
FPR1	ENSG00000171051	19	51745172	51804115	formyl peptide receptor 1 [Source:HGNC Symbol;Acc:HGNC:3826]
FPR2	ENSG00000171049	19	51752026	51770531	formyl peptide receptor 2 [Source:HGNC Symbol;Acc:HGNC:3827]
G0S2	ENSG00000123689	1	209675412	209676390	G0/G1 switch 2 [Source:HGNC Symbol;Acc:HGNC:30229]
H2BC4	ENSG00000180596	6	26114873	26123926	H2B clustered histone 4 [Source:HGNC Symbol;Acc:HGNC:4757]
HMGB1	ENSG00000189403	13	30456704	30617597	high mobility group box 1 [Source:HGNC Symbol;Acc:HGNC:4983]
HPSE	ENSG00000173083	4	83292461	83335153	heparanase [Source:HGNC Symbol;Acc:HGNC:5164]
IL17A	ENSG00000112115	6	52186375	52190638	interleukin 17A [Source:HGNC Symbol;Acc:HGNC:5981]
IL1B	ENSG00000125538	2	112829751	112836816	interleukin 1 beta [Source:HGNC Symbol;Acc:HGNC:5992]
IL6	ENSG00000136244	7	22725884	22732002	interleukin 6 [Source:HGNC Symbol;Acc:HGNC:6018]
IRAK4	ENSG00000198001	12	43758944	43798307	interleukin 1 receptor associated kinase 4 [Source:HGNC Symbol;Acc:HGNC:17967]
ITGAM	ENSG00000169896	16	31259967	31332892	integrin subunit alpha M [Source:HGNC Symbol;Acc:HGNC:6149]
ITGB2	ENSG00000160255	21	44885953	44931989	integrin subunit beta 2 [Source:HGNC Symbol;Acc:HGNC:6155]
KCNJ15	ENSG00000157551	21	38155549	38307357	potassium inwardly rectifying channel subfamily J member 15 [Source:HGNC Symbol;Acc:HGNC:6261]
KCNN3	ENSG00000143603	1	154697455	154870281	potassium calcium-activated channel subfamily N member 3 [Source:HGNC Symbol;Acc:HGNC:6292]
LILRB2	ENSG00000131042	19	54273812	54281184	leukocyte immunoglobulin like receptor B2 [Source:HGNC Symbol;Acc:HGNC:6606]
MAPK1	ENSG00000100030	22	21759657	21867680	mitogen-activated protein kinase 1 [Source:HGNC Symbol;Acc:HGNC:6871]
MAPK3	ENSG00000102882	16	30114105	30123506	mitogen-activated protein kinase 3 [Source:HGNC Symbol;Acc:HGNC:6877]
MGAM	ENSG00000257335	7	141907813	142106747	maltase-glucoamylase [Source:HGNC Symbol;Acc:HGNC:7043]
MME	ENSG00000196549	3	155024124	155183704	membrane metalloendopeptidase [Source:HGNC Symbol;Acc:HGNC:7154]
MMP9	ENSG00000100985	20	46008908	46016561	matrix metallopeptidase 9 [Source:HGNC Symbol;Acc:HGNC:7176]
MPO	ENSG00000005381	17	58269855	58280935	myeloperoxidase [Source:HGNC Symbol;Acc:HGNC:7218]
MTOR	ENSG00000198793	1	11106535	11262556	mechanistic target of rapamycin kinase [Source:HGNC Symbol;Acc:HGNC:3942]
PADI4	ENSG00000159339	1	17308195	17364004	peptidyl arginine deiminase 4 [Source:HGNC Symbol;Acc:HGNC:18368]
PDE4B	ENSG00000184588	1	65792514	66374579	phosphodiesterase 4B [Source:HGNC Symbol;Acc:HGNC:8781]
PIK3CA	ENSG00000121879	3	179148114	179240093	phosphatidylinositol-4,5-bisphosphate 3-kinase catalytic subunit alpha [Source:HGNC Symbol;Acc:HGNC:8975]
PTAFR	ENSG00000169403	1	28147166	28193936	platelet activating factor receptor [Source:HGNC Symbol;Acc:HGNC:9582]
RIPK1	ENSG00000137275	6	3063824	3115187	receptor interacting serine/threonine kinase 1 [Source:HGNC Symbol;Acc:HGNC:10019]
RIPK3	ENSG00000129465	14	24336025	24340022	receptor interacting serine/threonine kinase 3 [Source:HGNC Symbol;Acc:HGNC:10021]
S100A12	ENSG00000163221	1	153373711	153375621	S100 calcium binding protein A12 [Source:HGNC Symbol;Acc:HGNC:10489]
SELP	ENSG00000174175	1	169588849	169630193	selectin P [Source:HGNC Symbol;Acc:HGNC:10721]
SELPLG	ENSG00000110876	12	108621895	108633894	selectin P ligand [Source:HGNC Symbol;Acc:HGNC:10722]
SIGLEC14	ENSG00000254415	19	51639478	51646825	sialic acid binding Ig like lectin 14 [Source:HGNC Symbol;Acc:HGNC:32926]
SLC22A4	ENSG00000197208	5	132294394	132344190	solute carrier family 22 member 4 [Source:HGNC Symbol;Acc:HGNC:10968]
SLC25A37	ENSG00000147454	8	23528956	23575463	solute carrier family 25 member 37 [Source:HGNC Symbol;Acc:HGNC:29786]
TECPR2	ENSG00000196663	14	102362941	102502477	tectonin beta-propeller repeat containing 2 [Source:HGNC Symbol;Acc:HGNC:19957]
TLR2	ENSG00000137462	4	153684070	153706260	toll like receptor 2 [Source:HGNC Symbol;Acc:HGNC:11848]
TLR4	ENSG00000136869	9	117704175	117724735	toll like receptor 4 [Source:HGNC Symbol;Acc:HGNC:11850]
TLR7	ENSG00000196664	X	12867072	12890361	toll like receptor 7 [Source:HGNC Symbol;Acc:HGNC:15631]
TLR8	ENSG00000101916	X	12906620	12923169	toll like receptor 8 [Source:HGNC Symbol;Acc:HGNC:15632]
TNF	ENSG00000232810	6	31575565	31578336	tumor necrosis factor [Source:HGNC Symbol;Acc:HGNC:11892]
TNFRSF10C	ENSG00000173535	8	23102921	23117445	TNF receptor superfamily member 10c [Source:HGNC Symbol;Acc:HGNC:11906]
VNN3P	ENSG00000093134	6	132722784	132736935	vanin 3, pseudogene [Source:HGNC Symbol;Acc:HGNC:16431]
SIGLEC5	ENSG00000105501	19	51630101	51645545	sialic acid binding Ig like lectin 5 [Source:HGNC Symbol;Acc:HGNC:10874]
