# Supplementary material
Source: publisher site journal article supplement (doi:10.18632/aging.206048)
Supplement: Supplementary file 3 [file aging-v16-206048-supplementary-material-SD4.xlsx]

## Sheet: Sheet 1
Supplementary Table 3. Inferred TB subtypes and TBSig score of PTB patients.
Source	Patient	GSVA	TBSig	Subtypes
GSE41055	GSM1008078	0.653927	0.673343	C1
GSE41055	GSM1008079	0.646692	0.62638	C2
GSE41055	GSM1008080	0.735881	0.970381	C1
GSE41055	GSM1008081	0.491686	0.00828513	C3
GSE41055	GSM1008082	0.540834	0.0624922	C3
GSE41055	GSM1008083	0.738038	0.972838	C2
GSE41055	GSM1008084	0.645591	0.619044	C3
GSE41055	GSM1008085	0.647717	0.633172	C2
GSE41055	GSM1008086	0.724715	0.954544	C1
GSE73408	GSM1892913	0.695386	0.880254	C2
GSE73408	GSM1892914	0.654785	0.678753	C3
GSE73408	GSM1892915	0.686252	0.8452	C1
GSE73408	GSM1892916	0.739909	0.97483	C1
GSE73408	GSM1892917	0.700006	0.895672	C1
GSE73408	GSM1892918	0.628789	0.503317	C3
GSE73408	GSM1892919	0.770324	0.993621	C1
GSE73408	GSM1892920	0.61413	0.401769	C3
GSE73408	GSM1892921	0.531692	0.0450847	C3
GSE73408	GSM1892922	0.712329	0.929676	C1
GSE73408	GSM1892923	0.66292	0.728035	C3
GSE73408	GSM1892924	0.584413	0.220671	C3
GSE73408	GSM1892925	0.656285	0.688119	C1
GSE73408	GSM1892926	0.712487	0.930048	C1
GSE73408	GSM1892927	0.680625	0.82053	C2
GSE73408	GSM1892928	0.68329	0.832508	C2
GSE73408	GSM1892929	0.655854	0.685437	C1
GSE73408	GSM1892930	0.65112	0.6554	C3
GSE73408	GSM1892931	0.677232	0.80452	C1
GSE73408	GSM1892932	0.681804	0.825891	C2
GSE73408	GSM1892933	0.602581	0.325885	C3
GSE73408	GSM1892934	0.630232	0.513408	C3
GSE73408	GSM1892935	0.644748	0.6134	C3
GSE73408	GSM1892936	0.660489	0.713706	C1
GSE73408	GSM1892937	0.645912	0.621191	C2
GSE73408	GSM1892938	0.69182	0.8673	C1
GSE73408	GSM1892939	0.693593	0.873856	C2
GSE73408	GSM1892940	0.692049	0.868158	C2
GSE73408	GSM1892941	0.644574	0.61223	C1
GSE73408	GSM1892942	0.677988	0.808158	C1
GSE73408	GSM1892943	0.636722	0.558605	C3
GSE73408	GSM1892944	0.669488	0.764874	C1
GSE73408	GSM1892945	0.681839	0.826051	C2
GSE73408	GSM1892946	0.655372	0.682433	C3
GSE73408	GSM1892947	0.672551	0.781062	C1
GSE19439	GSM484449	0.700954	0.898649	C1
GSE19439	GSM484451	0.693792	0.874576	C1
GSE19439	GSM484456	0.710434	0.925088	C1
GSE19439	GSM484459	0.745172	0.979787	C2
GSE19439	GSM484463	0.622667	0.460552	C3
GSE19439	GSM484466	0.611257	0.382412	C3
GSE19439	GSM484468	0.634621	0.544028	C3
GSE19439	GSM484470	0.559205	0.112756	C3
GSE19439	GSM484472	0.875469	0.999993	C1
GSE19439	GSM484474	0.68021	0.818617	C1
GSE19439	GSM484475	0.636885	0.559737	C3
GSE19439	GSM484478	0.656883	0.691816	C2
GSE19439	GSM484485	0.645242	0.616715	C3
GSE19444	GSM484595	0.688138	0.852945	C2
GSE19444	GSM484596	0.718614	0.943359	C1
GSE19444	GSM484597	0.578914	0.193146	C3
GSE19444	GSM484598	0.649374	0.644058	C2
GSE19444	GSM484605	0.674472	0.790881	C1
GSE19444	GSM484606	0.660542	0.714024	C1
GSE19444	GSM484610	0.625894	0.483066	C3
GSE19444	GSM484611	0.760363	0.989715	C1
GSE19444	GSM484618	0.702878	0.904503	C2
GSE19444	GSM484619	0.682757	0.830151	C1
GSE19444	GSM484620	0.631402	0.521587	C2
GSE19444	GSM484621	0.615744	0.412756	C3
GSE19444	GSM484628	0.721764	0.949377	C3
GSE19444	GSM484629	0.620323	0.444268	C2
GSE19444	GSM484630	0.643871	0.6075	C3
GSE19444	GSM484631	0.636954	0.560213	C2
GSE19444	GSM484638	0.669936	0.76728	C2
GSE19444	GSM484639	0.624927	0.476311	C3
GSE19444	GSM484641	0.618842	0.434025	C3
GSE19444	GSM484642	0.628011	0.497876	C3
GSE19444	GSM484645	0.621637	0.453387	C1
GSE29536	GSM731200	0.66109	0.717282	C2
GSE29536	GSM731201	0.66889	0.761635	C2
GSE29536	GSM731203	0.67	0.767624	C1
GSE29536	GSM731205	0.682905	0.830808	C2
GSE29536	GSM731207	0.566328	0.138498	C3
GSE29536	GSM731208	0.578204	0.189752	C3
GSE29536	GSM731209	0.817174	0.999537	C1
GSE29536	GSM731210	0.6872	0.849126	C1
GSE29536	GSM731212	0.608524	0.364266	C3
GSE37250	GSM914353	0.647786	0.633623	C1
GSE37250	GSM914354	0.645595	0.619072	C3
GSE37250	GSM914355	0.622309	0.45806	C3
GSE37250	GSM914356	0.61778	0.426708	C3
GSE37250	GSM914357	0.634512	0.543275	C2
GSE37250	GSM914358	0.587482	0.236964	C3
GSE37250	GSM914359	0.598179	0.298575	C3
GSE37250	GSM914360	0.621057	0.449358	C3
GSE37250	GSM914361	0.666105	0.746248	C2
GSE37250	GSM914362	0.53586	0.0524635	C3
GSE37250	GSM914363	0.756999	0.987989	C2
GSE37250	GSM914364	0.611214	0.382125	C2
GSE37250	GSM914365	0.543663	0.0688293	C3
GSE37250	GSM914366	0.61705	0.421698	C3
GSE37250	GSM914367	0.641237	0.589638	C2
GSE37250	GSM914368	0.656091	0.686911	C1
GSE37250	GSM914369	0.665113	0.740649	C1
GSE37250	GSM914370	0.618816	0.433845	C3
GSE37250	GSM914371	0.751905	0.9849	C2
GSE37250	GSM914372	0.613039	0.394386	C3
GSE37250	GSM914373	0.638809	0.573012	C1
GSE37250	GSM914374	0.595749	0.28396	C3
GSE37250	GSM914375	0.644752	0.613431	C2
GSE37250	GSM914376	0.677833	0.807419	C2
GSE37250	GSM914377	0.638219	0.56895	C2
GSE37250	GSM914378	0.649827	0.64701	C1
GSE37250	GSM914379	0.658468	0.70153	C1
GSE37250	GSM914380	0.622042	0.4562	C3
GSE37250	GSM914381	0.703469	0.906249	C2
GSE37250	GSM914382	0.605731	0.346032	C1
GSE37250	GSM914383	0.617219	0.422856	C2
GSE37250	GSM914384	0.613102	0.394813	C3
GSE37250	GSM914385	0.656957	0.692274	C1
GSE37250	GSM914386	0.639841	0.580098	C2
GSE37250	GSM914387	0.516801	0.0252526	C3
GSE37250	GSM914388	0.633699	0.537615	C1
GSE37250	GSM914389	0.617707	0.42621	C3
GSE37250	GSM914390	0.648032	0.635251	C1
GSE37250	GSM914391	0.647023	0.628577	C2
GSE37250	GSM914392	0.626942	0.490397	C3
GSE37250	GSM914393	0.597186	0.292561	C3
GSE37250	GSM914394	0.633393	0.535482	C3
GSE37250	GSM914395	0.621201	0.450358	C3
GSE37250	GSM914396	0.671646	0.776347	C1
GSE37250	GSM914397	0.568577	0.147402	C3
GSE37250	GSM914398	0.612357	0.389795	C3
GSE37250	GSM914399	0.701881	0.901503	C1
GSE37250	GSM914400	0.661978	0.722525	C1
GSE37250	GSM914401	0.5917	0.260394	C3
GSE37250	GSM914402	0.599703	0.307911	C3
GSE37250	GSM914403	0.670152	0.76844	C1
GSE37250	GSM914404	0.644517	0.611847	C2
GSE37250	GSM914405	0.641407	0.590801	C2
GSE37250	GSM914406	0.65301	0.667527	C1
GSE37250	GSM914407	0.641185	0.589282	C2
GSE37250	GSM914408	0.647221	0.629889	C2
GSE37250	GSM914409	0.652994	0.667419	C2
GSE37250	GSM914410	0.632577	0.52979	C2
GSE37250	GSM914411	0.722237	0.950235	C1
GSE37250	GSM914412	0.675524	0.796144	C1
GSE37250	GSM914413	0.680728	0.821003	C2
GSE37250	GSM914414	0.636337	0.555942	C3
GSE37250	GSM914415	0.645997	0.621757	C2
GSE37250	GSM914416	0.654608	0.677641	C3
GSE37250	GSM914417	0.533873	0.0488341	C3
GSE37250	GSM914418	0.76969	0.993419	C1
GSE37250	GSM914419	0.877865	0.999994	C1
GSE37250	GSM914420	0.709455	0.92263	C1
GSE37250	GSM914421	0.653394	0.66997	C2
GSE37250	GSM914422	0.625325	0.479093	C2
GSE37250	GSM914423	0.653198	0.668722	C1
GSE37250	GSM914424	0.668901	0.7617	C1
GSE37250	GSM914425	0.753341	0.985833	C1
GSE37250	GSM914426	0.654687	0.678139	C1
GSE37250	GSM914427	0.672073	0.778576	C1
GSE37250	GSM914428	0.658196	0.699875	C1
GSE37250	GSM914429	0.679688	0.816193	C1
GSE37250	GSM914430	0.631925	0.525241	C1
GSE37250	GSM914431	0.582741	0.212076	C2
GSE37250	GSM914432	0.61544	0.410681	C3
GSE37250	GSM914433	0.631566	0.522732	C2
GSE37250	GSM914434	0.626532	0.487529	C3
GSE37250	GSM914435	0.845691	0.999931	C1
GSE37250	GSM914436	0.660306	0.712615	C1
GSE37250	GSM914437	0.692051	0.868167	C1
GSE37250	GSM914438	0.681402	0.824077	C1
GSE37250	GSM914439	0.681577	0.824868	C2
GSE37250	GSM914440	0.647578	0.632253	C2
GSE37250	GSM914441	0.646873	0.627584	C1
GSE37250	GSM914442	0.65103	0.654816	C2
GSE37250	GSM914443	0.653174	0.668569	C2
GSE37250	GSM914444	0.646571	0.625576	C2
GSE37250	GSM914445	0.67339	0.785383	C1
GSE37250	GSM914446	0.641284	0.58996	C2
GSE37250	GSM914447	0.616837	0.420233	C3
GSE37250	GSM914448	0.81001	0.99928	C1
GSE37250	GSM914449	0.661268	0.718336	C1
GSE37250	GSM914450	0.623063	0.46331	C3
GSE37250	GSM914451	0.617214	0.422823	C3
GSE37250	GSM914452	0.580141	0.199101	C3
GSE37250	GSM914453	0.556286	0.103259	C3
GSE37250	GSM914454	0.662911	0.727983	C2
GSE37250	GSM914455	0.668655	0.760361	C2
GSE37250	GSM914456	0.315178	1.99165e-08	C3
GSE37250	GSM914457	0.576776	0.183036	C3
GSE37250	GSM914458	0.645183	0.61632	C2
GSE37250	GSM914459	0.61543	0.410617	C2
GSE37250	GSM914460	0.647917	0.634488	C2
GSE37250	GSM914461	0.610766	0.37913	C3
GSE37250	GSM914462	0.509484	0.0185808	C3
GSE37250	GSM914463	0.452527	0.00102513	C3
GSE37250	GSM914464	0.637232	0.562137	C3
GSE37250	GSM914465	0.571585	0.159894	C3
GSE37250	GSM914466	0.72384	0.953059	C2
GSE37250	GSM914467	0.643613	0.605758	C2
GSE37250	GSM914468	0.583454	0.215716	C3
GSE37250	GSM914469	0.551977	0.0903237	C3
GSE37250	GSM914470	0.645944	0.621405	C1
GSE37250	GSM914471	0.599795	0.308477	C2
GSE37250	GSM914472	0.591587	0.259754	C3
GSE37250	GSM914473	0.560686	0.117805	C3
GSE37250	GSM914474	0.557024	0.105604	C3
GSE37250	GSM914475	0.635083	0.547238	C2
GSE37250	GSM914476	0.448069	0.000786058	C3
GSE37250	GSM914477	0.627357	0.493299	C1
GSE37250	GSM914478	0.638923	0.573794	C2
GSE37250	GSM914479	0.555151	0.0997293	C3
GSE37250	GSM914480	0.642798	0.600249	C2
GSE37250	GSM914481	0.604208	0.33623	C2
GSE37250	GSM914482	0.680738	0.821045	C1
GSE37250	GSM914483	0.658397	0.701095	C2
GSE37250	GSM914484	0.657825	0.697608	C1
GSE37250	GSM914485	0.804781	0.999015	C1
GSE37250	GSM914486	0.745655	0.980197	C1
GSE37250	GSM914487	0.642454	0.597918	C1
GSE37250	GSM914488	0.636045	0.553918	C2
GSE37250	GSM914489	0.597128	0.292213	C2
GSE37250	GSM914490	0.532374	0.0462318	C3
GSE37250	GSM914491	0.639948	0.580831	C2
GSE37250	GSM914492	0.613476	0.397342	C3
GSE37250	GSM914493	0.612055	0.387761	C3
GSE37250	GSM914494	0.649415	0.644327	C1
GSE37250	GSM914495	0.59169	0.260337	C3
GSE37250	GSM914496	0.873507	0.999991	C1
GSE37250	GSM914497	0.635472	0.54994	C2
GSE37250	GSM914498	0.594598	0.277156	C3
GSE37250	GSM914499	0.615606	0.411812	C2
GSE37250	GSM914500	0.612601	0.391435	C3
GSE37250	GSM914501	0.636737	0.558709	C2
GSE37250	GSM914502	0.636407	0.556426	C2
GSE37250	GSM914503	0.654311	0.675769	C1
GSE37250	GSM914504	0.654515	0.677054	C1
GSE37250	GSM914505	0.761197	0.990107	C1
GSE37250	GSM914506	0.688089	0.852745	C1
GSE37250	GSM914507	0.670918	0.772512	C1
GSE37250	GSM914508	0.754109	0.986311	C1
GSE37250	GSM914509	0.648361	0.637412	C2
GSE37250	GSM914510	0.856839	0.999969	C1
GSE37250	GSM914511	0.66198	0.722536	C1
GSE37250	GSM914512	0.627505	0.494331	C3
GSE37250	GSM914513	0.618458	0.43138	C3
GSE37250	GSM914514	0.710523	0.925307	C1
GSE37250	GSM914515	0.624659	0.474441	C2
GSE37250	GSM914516	0.605878	0.34698	C3
GSE37250	GSM914517	0.721784	0.949415	C1
GSE37250	GSM914518	0.650552	0.651726	C2
GSE37250	GSM914519	0.672514	0.780868	C2
GSE37250	GSM914520	0.825445	0.999727	C1
GSE37250	GSM914521	0.603492	0.331665	C3
GSE37250	GSM914522	0.794242	0.998192	C1
GSE37250	GSM914523	0.807813	0.999178	C1
GSE37250	GSM914524	0.628166	0.498958	C2
GSE37250	GSM914525	0.686518	0.846306	C2
GSE37250	GSM914526	0.650863	0.653739	C1
GSE37250	GSM914527	0.604286	0.33673	C3
GSE37250	GSM914528	0.771049	0.993846	C1
GSE37250	GSM914529	0.663961	0.73406	C1
GSE37250	GSM914530	0.605299	0.343243	C3
GSE37250	GSM914531	0.624809	0.47549	C2
GSE37250	GSM914532	0.741104	0.976037	C1
GSE37250	GSM914533	0.60756	0.357933	C3
GSE37250	GSM914534	0.621087	0.449566	C2
GSE37250	GSM914535	0.654012	0.673883	C2
GSE37250	GSM914536	0.647346	0.630721	C2
GSE37250	GSM914537	0.633182	0.534008	C2
GSE37250	GSM914538	0.621589	0.45305	C3
GSE37250	GSM914539	0.640149	0.582203	C3
GSE37250	GSM914540	0.631694	0.523628	C3
GSE37250	GSM914541	0.637768	0.565839	C2
GSE37250	GSM914542	0.59912	0.304325	C3
GSE37250	GSM914543	0.492219	0.00849865	C3
GSE37250	GSM914544	0.507723	0.0172209	C3
GSE37250	GSM914545	0.81584	0.999497	C1
GSE37250	GSM914546	0.652866	0.666608	C3
GSE37250	GSM914547	0.563018	0.126075	C3
GSE39939	GSM1249177	0.779908	0.996076	C1
GSE39939	GSM1249178	0.748501	0.982474	C1
GSE39939	GSM1249179	0.635974	0.553424	C1
GSE39939	GSM1249180	0.834687	0.999852	C1
GSE39939	GSM1249181	0.646369	0.624234	C2
GSE39939	GSM1249182	0.703588	0.906598	C1
GSE39939	GSM1249183	0.647841	0.633989	C2
GSE39939	GSM1249184	0.671882	0.777584	C1
GSE39939	GSM1249185	0.663741	0.732793	C2
GSE39939	GSM1249186	0.675712	0.797076	C1
GSE39939	GSM1249216	0.634455	0.542873	C2
GSE39939	GSM1249217	0.707551	0.917674	C1
GSE39939	GSM1249218	0.649657	0.645903	C2
GSE39939	GSM1249219	0.718587	0.943305	C1
GSE39939	GSM1249220	0.677882	0.807653	C1
GSE39939	GSM1249221	0.686816	0.847543	C1
GSE39939	GSM1249222	0.661026	0.716902	C1
GSE39939	GSM1249223	0.656794	0.691269	C1
GSE39939	GSM1249224	0.671075	0.773342	C1
GSE39939	GSM1249225	0.663435	0.731022	C1
GSE39939	GSM1249226	0.659264	0.706355	C1
GSE39939	GSM1249227	0.758166	0.988614	C1
GSE39939	GSM1249228	0.65276	0.665933	C2
GSE39939	GSM1249229	0.606987	0.35419	C3
GSE39939	GSM1249230	0.674983	0.793448	C1
GSE39939	GSM1249231	0.785152	0.997025	C1
GSE39939	GSM1249232	0.652758	0.665915	C2
GSE39939	GSM1249233	0.577607	0.186927	C3
GSE39939	GSM1249234	0.619356	0.437578	C3
GSE39939	GSM1249235	0.641191	0.58933	C2
GSE39939	GSM1249236	0.618622	0.432509	C3
GSE39939	GSM1249237	0.648877	0.640802	C2
GSE39939	GSM1249238	0.578067	0.189103	C3
GSE39939	GSM1249239	0.627368	0.493378	C2
GSE39939	GSM1249240	0.648078	0.635552	C2
GSE39939	GSM1249281	0.611661	0.385121	C2
GSE39939	GSM1249282	0.501462	0.013052	C3
GSE39939	GSM1249283	0.63954	0.578032	C2
GSE39939	GSM1249284	0.558621	0.110806	C3
GSE39939	GSM1249285	0.538544	0.0577032	C3
GSE39939	GSM1249286	0.576728	0.182811	C3
GSE39939	GSM1249287	0.57654	0.181941	C3
GSE39939	GSM1249288	0.621934	0.455449	C3
GSE39939	GSM1249289	0.63271	0.530716	C2
GSE39939	GSM1249290	0.488997	0.00727752	C3
GSE39939	GSM1249291	0.591398	0.258677	C3
GSE39939	GSM1249292	0.604919	0.340795	C3
GSE39939	GSM1249293	0.54975	0.0841299	C3
GSE39939	GSM1249294	0.404704	4.39904e-05	C3
GSE39939	GSM1249295	0.61412	0.401701	C3
GSE39939	GSM1249296	0.649981	0.648014	C2
GSE39939	GSM1249297	0.614682	0.405523	C3
GSE39939	GSM1249298	0.57486	0.174263	C3
GSE39939	GSM1249299	0.575184	0.175726	C3
GSE39939	GSM1249300	0.600374	0.312063	C3
GSE39939	GSM1249301	0.678134	0.808856	C1
GSE39939	GSM1249302	0.57144	0.159278	C3
GSE39939	GSM1249303	0.56203	0.122524	C3
GSE39939	GSM1249304	0.566934	0.140862	C3
GSE39939	GSM1249305	0.587208	0.235482	C3
GSE39939	GSM1249306	0.681406	0.824094	C1
GSE39939	GSM1249307	0.693116	0.872112	C1
GSE39939	GSM1249308	0.63199	0.525695	C2
GSE39939	GSM1249309	0.599134	0.30441	C3
GSE39939	GSM1249310	0.725894	0.956485	C2
GSE39939	GSM1249311	0.531647	0.0450092	C3
GSE39939	GSM1249312	0.630559	0.515695	C2
GSE39939	GSM1249313	0.510744	0.0196097	C3
GSE39939	GSM1249314	0.609633	0.371595	C3
GSE39939	GSM1249315	0.627909	0.497163	C2
GSE39939	GSM1249316	0.621198	0.450333	C3
GSE39939	GSM1249317	0.629168	0.505966	C2
GSE39939	GSM1249318	0.635905	0.552945	C2
GSE39939	GSM1249319	0.454467	0.00114867	C3
GSE39939	GSM1249320	0.653002	0.667471	C2
GSE39939	GSM1249321	0.587943	0.239466	C3
GSE39939	GSM1249322	0.646607	0.625817	C1
GSE39939	GSM1249323	0.633955	0.539397	C3
GSE39939	GSM1249324	0.618259	0.43001	C3
GSE39940	GSM981627	0.622573	0.459895	C3
GSE39940	GSM981628	0.638888	0.573553	C1
GSE39940	GSM981629	0.62929	0.506825	C3
GSE39940	GSM981630	0.771726	0.994049	C1
GSE39940	GSM981631	0.730713	0.963736	C1
GSE39940	GSM981632	0.520806	0.0296867	C3
GSE39940	GSM981633	0.570976	0.157311	C3
GSE39940	GSM981634	0.658452	0.701433	C2
GSE39940	GSM981635	0.696956	0.885665	C1
GSE39940	GSM981636	0.626972	0.490607	C3
GSE39940	GSM981637	0.656977	0.692398	C1
GSE39940	GSM981638	0.562588	0.12452	C3
GSE39940	GSM981639	0.655953	0.686055	C1
GSE39940	GSM981640	0.752744	0.985451	C1
GSE39940	GSM981641	0.555584	0.101065	C3
GSE39940	GSM981642	0.58475	0.222429	C3
GSE39940	GSM981643	0.644829	0.613943	C2
GSE39940	GSM981644	0.640203	0.582578	C2
GSE39940	GSM981645	0.672122	0.778832	C1
GSE39940	GSM981646	0.723904	0.953168	C1
GSE39940	GSM981647	0.584656	0.221939	C3
GSE39940	GSM981648	0.60908	0.367934	C1
GSE39940	GSM981649	0.683048	0.831442	C1
GSE39940	GSM981650	0.597623	0.295199	C2
GSE39940	GSM981651	0.563287	0.127057	C3
GSE39940	GSM981652	0.6681	0.757326	C1
GSE39940	GSM981653	0.562384	0.123787	C3
GSE39940	GSM981654	0.611526	0.384212	C3
GSE39940	GSM981655	0.641694	0.592752	C2
GSE39940	GSM981656	0.730437	0.963349	C1
GSE39940	GSM981657	0.64144	0.591025	C2
GSE39940	GSM981658	0.652412	0.663707	C2
GSE39940	GSM981659	0.621341	0.451331	C3
GSE39940	GSM981660	0.672183	0.779153	C1
GSE39940	GSM981661	0.66398	0.734168	C1
GSE39940	GSM981662	0.644047	0.608688	C2
GSE39940	GSM981663	0.617106	0.422083	C3
GSE39940	GSM981664	0.671897	0.777661	C1
GSE39940	GSM981665	0.529356	0.0413287	C3
GSE39940	GSM981666	0.662136	0.723453	C1
GSE39940	GSM981667	0.674297	0.789997	C2
GSE39940	GSM981668	0.643638	0.605927	C2
GSE39940	GSM981669	0.59153	0.259426	C3
GSE39940	GSM981670	0.60887	0.366547	C1
GSE39940	GSM981671	0.670065	0.767972	C1
GSE39940	GSM981672	0.669529	0.765093	C1
GSE39940	GSM981673	0.669229	0.763474	C1
GSE39940	GSM981674	0.649635	0.645761	C1
GSE39940	GSM981675	0.660298	0.712565	C1
GSE39940	GSM981676	0.466532	0.0022753	C3
GSE39940	GSM981677	0.615716	0.412565	C3
GSE39940	GSM981678	0.727906	0.959643	C1
GSE39940	GSM981679	0.644535	0.611971	C1
GSE39940	GSM981680	0.58872	0.243717	C1
GSE39940	GSM981681	0.645409	0.617828	C1
GSE39940	GSM981682	0.647258	0.630133	C2
GSE39940	GSM981683	0.654972	0.679928	C2
GSE39940	GSM981684	0.738406	0.97324	C1
GSE39940	GSM981685	0.572861	0.165396	C3
GSE39940	GSM981686	0.669598	0.765465	C2
GSE39940	GSM981687	0.602848	0.327574	C1
GSE39940	GSM981688	0.676147	0.799224	C1
GSE39940	GSM981689	0.579571	0.19632	C3
GSE39940	GSM981690	0.653138	0.668339	C2
GSE39940	GSM981691	0.658552	0.702038	C1
GSE39940	GSM981692	0.580252	0.199643	C3
GSE39940	GSM981693	0.630035	0.512033	C2
GSE39940	GSM981694	0.522351	0.0315607	C3
GSE39940	GSM981695	0.601311	0.317902	C3
GSE39940	GSM981696	0.643997	0.608351	C1
GSE39940	GSM981697	0.452917	0.00104892	C3
GSE39940	GSM981698	0.601574	0.31955	C3
GSE39940	GSM981699	0.675768	0.797351	C2
GSE39940	GSM981700	0.595329	0.281468	C3
GSE39940	GSM981701	0.646822	0.627245	C2
GSE39940	GSM981702	0.578049	0.189015	C3
GSE39940	GSM981703	0.601871	0.32141	C3
GSE39940	GSM981704	0.615965	0.414267	C2
GSE39940	GSM981705	0.734668	0.96892	C1
GSE39940	GSM981706	0.842059	0.999911	C1
GSE39940	GSM981707	0.812541	0.999383	C1
GSE39940	GSM981708	0.640301	0.583246	C1
GSE39940	GSM981709	0.623614	0.467146	C3
GSE39940	GSM981710	0.651803	0.659799	C2
GSE39940	GSM981711	0.452853	0.00104501	C3
GSE39940	GSM981712	0.51912	0.0277473	C3
GSE39940	GSM981713	0.632617	0.530069	C2
GSE39940	GSM981714	0.648642	0.639264	C3
GSE39940	GSM981715	0.666826	0.750283	C2
GSE39940	GSM981716	0.710573	0.925431	C1
GSE39940	GSM981717	0.645862	0.620856	C2
GSE39940	GSM981718	0.602923	0.32805	C3
GSE39940	GSM981719	0.68401	0.835651	C2
GSE39940	GSM981720	0.613921	0.400355	C2
GSE39940	GSM981721	0.599582	0.307165	C3
GSE39940	GSM981722	0.645891	0.621048	C1
GSE39940	GSM981723	0.645972	0.621588	C2
GSE39940	GSM981724	0.782345	0.996546	C1
GSE39940	GSM981725	0.620446	0.445119	C1
GSE39940	GSM981726	0.650849	0.653649	C2
GSE39940	GSM981727	0.659817	0.709687	C2
GSE39940	GSM981728	0.656947	0.692215	C2
GSE39940	GSM981729	0.648414	0.63776	C2
GSE39940	GSM981730	0.830569	0.999805	C1
GSE39940	GSM981731	0.66411	0.734915	C2
GSE39940	GSM981732	0.551503	0.088978	C3
GSE39940	GSM981733	0.612025	0.387563	C3
GSE39940	GSM981734	0.615701	0.41246	C2
GSE39940	GSM981735	0.844704	0.999926	C1
GSE39940	GSM981736	0.654777	0.678705	C2
GSE39940	GSM981737	0.633676	0.53745	C2
GSE40553	GSM996267	0.6282	0.499193	C2
GSE40553	GSM996268	0.661652	0.720606	C2
GSE40553	GSM996269	0.599079	0.304076	C3
GSE40553	GSM996270	0.692884	0.871261	C1
GSE40553	GSM996271	0.641054	0.588392	C2
GSE40553	GSM996272	0.595006	0.279557	C3
GSE40553	GSM996273	0.576427	0.181418	C3
GSE40553	GSM996274	0.646913	0.627851	C1
GSE40553	GSM996275	0.628069	0.498283	C2
GSE40553	GSM996276	0.652758	0.665916	C2
GSE40553	GSM996277	0.657884	0.697971	C1
GSE40553	GSM996278	0.643493	0.604949	C2
GSE40553	GSM996279	0.663568	0.731791	C2
GSE40553	GSM996280	0.657293	0.694341	C1
GSE40553	GSM996281	0.585527	0.226511	C3
GSE40553	GSM996282	0.669	0.762237	C2
GSE40553	GSM996283	0.641305	0.590103	C3
GSE40553	GSM996284	0.699765	0.894907	C1
GSE40553	GSM996285	0.595739	0.2839	C3
GSE40553	GSM996286	0.607907	0.360211	C1
GSE40553	GSM996287	0.628102	0.498508	C3
GSE40553	GSM996288	0.648671	0.639451	C2
GSE40553	GSM996289	0.653794	0.672503	C2
GSE40553	GSM996290	0.616625	0.418784	C3
GSE40553	GSM996291	0.693119	0.872124	C3
GSE40553	GSM996292	0.609459	0.370443	C3
GSE40553	GSM996293	0.66822	0.757985	C1
GSE40553	GSM996294	0.629075	0.505316	C3
GSE40553	GSM996295	0.627673	0.495506	C2
GSE40553	GSM996296	0.630107	0.512533	C3
GSE40553	GSM996297	0.588973	0.245112	C3
GSE40553	GSM996298	0.662556	0.725911	C2
GSE40553	GSM996299	0.61926	0.436911	C3
GSE40553	GSM996300	0.623872	0.468947	C3
GSE40553	GSM996311	0.705887	0.913151	C1
GSE40553	GSM996312	0.634995	0.546631	C1
GSE40553	GSM996314	0.648103	0.635717	C2
GSE40553	GSM996317	0.589697	0.249121	C3
GSE40553	GSM996318	0.522584	0.0318525	C3
GSE40553	GSM996319	0.608691	0.365367	C3
GSE40553	GSM996320	0.633887	0.538919	C2
GSE40553	GSM996322	0.643805	0.607056	C2
GSE40553	GSM996325	0.558404	0.110088	C3
GSE40553	GSM996326	0.558252	0.109589	C3
GSE40553	GSM996328	0.672329	0.779911	C1
GSE40553	GSM996329	0.615139	0.408632	C2
GSE40553	GSM996330	0.578624	0.191755	C3
GSE40553	GSM996331	0.599153	0.304528	C3
GSE40553	GSM996332	0.642498	0.598218	C1
GSE40553	GSM996333	0.674994	0.793503	C1
GSE40553	GSM996335	0.636951	0.56019	C2
GSE40553	GSM996337	0.655693	0.684435	C2
GSE40553	GSM996338	0.718754	0.943637	C2
GSE40553	GSM996339	0.631823	0.52453	C2
GSE40553	GSM996341	0.641634	0.592348	C2
GSE40553	GSM996342	0.635226	0.548235	C2
GSE40553	GSM996343	0.622462	0.45912	C2
GSE40553	GSM996344	0.652236	0.662581	C1
GSE40553	GSM996345	0.63778	0.56592	C2
GSE40553	GSM996346	0.643368	0.604107	C2
GSE40553	GSM996347	0.636706	0.558495	C3
GSE40553	GSM996348	0.65085	0.653654	C2
GSE40553	GSM996349	0.563078	0.126294	C3
GSE40553	GSM996350	0.685822	0.843399	C1
GSE40553	GSM996352	0.61188	0.38659	C3
GSE40553	GSM996354	0.550889	0.0872568	C3
GSE40553	GSM996355	0.661597	0.720281	C1
GSE40553	GSM996356	0.653407	0.670047	C2
GSE40553	GSM996359	0.609688	0.371959	C3
GSE40553	GSM996360	0.614295	0.40289	C2
GSE40553	GSM996361	0.651447	0.65751	C1
GSE40553	GSM996365	0.607796	0.359481	C2
GSE40553	GSM996368	0.642289	0.596799	C2
GSE40553	GSM996369	0.676293	0.79994	C2
GSE40553	GSM996371	0.630597	0.515961	C2
GSE40553	GSM996372	0.616239	0.416142	C3
GSE40553	GSM996373	0.658074	0.699131	C1
GSE40553	GSM996374	0.650887	0.653891	C2
GSE40553	GSM996375	0.737168	0.971869	C1
GSE40553	GSM996376	0.449323	0.000847486	C3
GSE40553	GSM996378	0.580119	0.198989	C3
GSE40553	GSM996379	0.627712	0.495782	C2
GSE40553	GSM996380	0.642231	0.596401	C2
GSE40553	GSM996381	0.604297	0.336799	C3
GSE40553	GSM996383	0.581925	0.207951	C3
GSE40553	GSM996384	0.646331	0.623982	C1
GSE40553	GSM996386	0.622953	0.462543	C1
GSE40553	GSM996387	0.639437	0.577325	C2
GSE40553	GSM996388	0.724914	0.954877	C1
GSE40553	GSM996390	0.644752	0.613428	C2
GSE40553	GSM996391	0.614444	0.403905	C3
GSE40553	GSM996392	0.617887	0.427446	C3
GSE40553	GSM996393	0.662309	0.724468	C2
GSE40553	GSM996394	0.649468	0.64467	C1
GSE40553	GSM996395	0.616665	0.419058	C2
GSE40553	GSM996396	0.666583	0.748931	C1
GSE40553	GSM996398	0.641297	0.590048	C2
GSE40553	GSM996399	0.647955	0.634742	C1
GSE40553	GSM996400	0.72596	0.956591	C1
GSE40553	GSM996401	0.642525	0.5984	C1
GSE40553	GSM996402	0.638236	0.569064	C1
GSE40553	GSM996403	0.65707	0.692971	C2
GSE40553	GSM996404	0.669727	0.766161	C1
GSE40553	GSM996405	0.566127	0.137722	C3
GSE40553	GSM996406	0.641286	0.589975	C2
GSE40553	GSM996407	0.583213	0.214484	C3
GSE40553	GSM996408	0.833163	0.999836	C1
GSE40553	GSM996409	0.681705	0.825446	C1
GSE40553	GSM996410	0.747737	0.981886	C1
GSE40553	GSM996412	0.544988	0.0719621	C3
GSE40553	GSM996414	0.584655	0.221931	C3
GSE40553	GSM996415	0.657332	0.694583	C1
GSE40553	GSM996417	0.655609	0.683914	C1
GSE40553	GSM996419	0.629731	0.509904	C2
GSE40553	GSM996420	0.677075	0.80376	C1
GSE40553	GSM996421	0.685725	0.842991	C2
GSE40553	GSM996422	0.669895	0.767062	C1
GSE40553	GSM996423	0.64826	0.636749	C2
GSE40553	GSM996424	0.602117	0.322956	C3
GSE40553	GSM996425	0.627213	0.492288	C2
GSE40553	GSM996426	0.658139	0.699528	C1
GSE40553	GSM996427	0.63281	0.53142	C2
GSE40553	GSM996428	0.608101	0.361482	C3
GSE40553	GSM996429	0.745653	0.980195	C1
GSE40553	GSM996430	0.641767	0.593251	C3
GSE40553	GSM996431	0.633149	0.533784	C3
GSE40553	GSM996433	0.657349	0.694685	C1
GSE40553	GSM996434	0.658801	0.703551	C1
GSE40553	GSM996436	0.629252	0.506554	C3
GSE40553	GSM996437	0.615011	0.407761	C3
GSE40553	GSM996438	0.739163	0.974051	C1
GSE40553	GSM996440	0.573662	0.168913	C3
GSE40553	GSM996441	0.613828	0.399721	C3
GSE40553	GSM996442	0.566284	0.138328	C3
GSE40553	GSM996444	0.630837	0.517637	C3
GSE40553	GSM996445	0.625641	0.481297	C3
GSE40553	GSM996446	0.643562	0.605415	C3
GSE40553	GSM996447	0.640563	0.585038	C1
GSE40553	GSM996448	0.65562	0.683979	C1
GSE40553	GSM996450	0.609325	0.369555	C3
GSE40553	GSM996451	0.631876	0.524898	C1
GSE40553	GSM996452	0.592448	0.264671	C3
GSE40553	GSM996453	0.654374	0.676169	C1
GSE40553	GSM996454	0.648693	0.639593	C1
GSE40553	GSM996455	0.536444	0.0535714	C3
GSE40553	GSM996456	0.59297	0.267674	C3
GSE40553	GSM996457	0.645412	0.617848	C1
GSE40553	GSM996458	0.601489	0.319015	C3
GSE40553	GSM996459	0.61338	0.39669	C1
GSE40553	GSM996460	0.656699	0.69068	C1
GSE40553	GSM996461	0.599357	0.305781	C3
GSE40553	GSM996462	0.649204	0.642946	C1
GSE40553	GSM996463	0.608519	0.364236	C3
GSE40553	GSM996464	0.67529	0.79498	C1
GSE40553	GSM996467	0.715074	0.935936	C1
GSE40553	GSM996468	0.599497	0.306641	C3
GSE40553	GSM996469	0.634241	0.541388	C3
GSE40553	GSM996472	0.753952	0.986214	C1
GSE40553	GSM996473	0.662898	0.727908	C1
GSE40553	GSM996474	0.638937	0.573891	C2
GSE40553	GSM996475	0.626912	0.490187	C1
GSE40553	GSM996476	0.620438	0.445063	C1
GSE40553	GSM996477	0.576905	0.183637	C3
GSE40553	GSM996478	0.632919	0.532179	C3
GSE40553	GSM996479	0.516173	0.0246106	C3
GSE40553	GSM996480	0.671693	0.776594	C1
GSE42825	GSM1050732	0.654769	0.678655	C3
GSE42825	GSM1050734	0.617808	0.4269	C3
GSE42825	GSM1050735	0.651854	0.660126	C1
GSE42825	GSM1050736	0.778271	0.995729	C1
GSE42825	GSM1050737	0.682847	0.830551	C2
GSE42825	GSM1050738	0.649807	0.646881	C2
GSE42825	GSM1050739	0.710752	0.925874	C1
GSE42825	GSM1050740	0.622652	0.460444	C3
GSE42826	GSM1050865	0.592356	0.264145	C3
GSE42826	GSM1050866	0.66726	0.752696	C2
GSE42826	GSM1050867	0.692658	0.870426	C2
GSE42826	GSM1050868	0.653596	0.671248	C1
GSE42826	GSM1050869	0.693864	0.874838	C1
GSE42826	GSM1050870	0.70313	0.905248	C2
GSE42826	GSM1050871	0.758388	0.98873	C2
GSE42826	GSM1050872	0.671185	0.773924	C2
GSE42826	GSM1050873	0.704164	0.908273	C1
GSE42826	GSM1050874	0.803134	0.998915	C2
GSE42826	GSM1050875	0.675522	0.796133	C2
GSE42830	GSM1050934	0.617849	0.427183	C3
GSE42830	GSM1050942	0.613905	0.400248	C3
GSE42830	GSM1050943	0.770216	0.993587	C1
GSE42830	GSM1050948	0.704169	0.908286	C3
GSE42830	GSM1050953	0.708825	0.921015	C2
GSE42830	GSM1050955	0.672333	0.779929	C2
GSE42830	GSM1050966	0.692121	0.868427	C1
GSE42830	GSM1050971	0.643507	0.605046	C2
GSE42830	GSM1050979	0.648445	0.637967	C1
GSE42830	GSM1050988	0.687984	0.852321	C1
GSE42830	GSM1050994	0.662056	0.722982	C2
GSE42830	GSM1050996	0.745526	0.980089	C1
GSE42830	GSM1051001	0.644287	0.610301	C3
GSE42830	GSM1051002	0.653971	0.673625	C2
GSE42830	GSM1051008	0.649718	0.646303	C2
GSE42830	GSM1051014	0.651316	0.656666	C2
GSE42832	GSM1051040	0.660245	0.71225	C1
GSE42832	GSM1051042	0.643815	0.607125	C3
GSE42832	GSM1051045	0.623788	0.468363	C3
GSE42832	GSM1051063	0.675015	0.793606	C1
GSE42832	GSM1051087	0.645175	0.616267	C1
GSE42832	GSM1051088	0.601321	0.317963	C3
GSE42832	GSM1051090	0.693552	0.873708	C3
GSE42832	GSM1051098	0.830782	0.999808	C2
GSE42832	GSM1051099	0.673692	0.786926	C1
GSE42832	GSM1051114	0.658075	0.699133	C1
GSE69581	GSM1704154	0.540621	0.0620345	C3
GSE69581	GSM1704155	0.570712	0.1562	C3
GSE69581	GSM1704156	0.832703	0.999831	C1
GSE69581	GSM1704157	0.642895	0.600908	C2
GSE69581	GSM1704158	0.675131	0.794183	C2
GSE69581	GSM1704159	0.695128	0.879348	C1
GSE69581	GSM1704160	0.64477	0.61355	C2
GSE69581	GSM1704161	0.812166	0.999369	C1
GSE69581	GSM1704162	0.618732	0.433269	C3
GSE69581	GSM1704163	0.625553	0.480685	C3
GSE69581	GSM1704164	0.674428	0.790655	C3
GSE69581	GSM1704165	0.589377	0.247347	C3
GSE69581	GSM1704166	0.615575	0.411603	C2
GSE69581	GSM1704167	0.708597	0.920425	C1
GSE69581	GSM1704168	0.657663	0.696617	C2
GSE83456	GSM2203648	0.566999	0.141115	C3
GSE83456	GSM2203649	0.60309	0.329106	C3
GSE83456	GSM2203650	0.598916	0.303074	C1
GSE83456	GSM2203651	0.654859	0.679218	C1
GSE83456	GSM2203652	0.711642	0.928038	C2
GSE83456	GSM2203653	0.702992	0.90484	C1
GSE83456	GSM2203654	0.658103	0.699307	C2
GSE83456	GSM2203655	0.664228	0.735595	C2
GSE83456	GSM2203656	0.66069	0.714906	C2
GSE83456	GSM2203657	0.634351	0.542152	C2
GSE83456	GSM2203658	0.616608	0.418664	C2
GSE83456	GSM2203659	0.655259	0.681724	C2
GSE83456	GSM2203660	0.620546	0.445816	C2
GSE83456	GSM2203661	0.59519	0.280644	C3
GSE83456	GSM2203662	0.657806	0.697489	C1
GSE83456	GSM2203663	0.610832	0.37957	C3
GSE83456	GSM2203664	0.657088	0.693079	C3
GSE83456	GSM2203665	0.635568	0.550607	C1
GSE83456	GSM2203666	0.657439	0.695243	C1
GSE83456	GSM2203667	0.621861	0.454939	C2
GSE83456	GSM2203668	0.641529	0.59163	C2
GSE83456	GSM2203669	0.622942	0.462467	C3
GSE83456	GSM2203670	0.687473	0.850245	C3
GSE83456	GSM2203671	0.620598	0.446171	C3
GSE83456	GSM2203672	0.866384	0.999985	C1
GSE83456	GSM2203673	0.641963	0.594582	C2
GSE83456	GSM2203674	0.642648	0.599236	C2
GSE83456	GSM2203675	0.634082	0.540279	C2
GSE83456	GSM2203676	0.634785	0.545171	C3
GSE83456	GSM2203677	0.66334	0.730476	C1
GSE83456	GSM2203678	0.682144	0.827422	C1
GSE83456	GSM2203679	0.758615	0.988847	C1
GSE83456	GSM2203680	0.693321	0.872865	C1
GSE83456	GSM2203681	0.646799	0.627091	C1
GSE83456	GSM2203682	0.671999	0.778192	C2
GSE83456	GSM2203683	0.64787	0.634181	C2
GSE83456	GSM2203684	0.68431	0.836951	C2
GSE83456	GSM2203685	0.631788	0.524284	C3
GSE83456	GSM2203686	0.61113	0.381562	C3
GSE83456	GSM2203687	0.661846	0.721748	C2
GSE83456	GSM2203688	0.611063	0.381117	C3
GSE83456	GSM2203689	0.657194	0.693734	C1
GSE83456	GSM2203690	0.670593	0.770791	C1
GSE83456	GSM2203691	0.632543	0.529556	C3
GSE83456	GSM2203692	0.809213	0.999244	C1
GSE25534	GSM627652_ch1	0.665312	0.741777	C2
GSE25534	GSM627653_ch1	0.732392	0.966018	C1
GSE25534	GSM627654_ch1	0.63832	0.569644	C2
GSE25534	GSM627655_ch1	0.635695	0.551494	C3
GSE25534	GSM627656_ch1	0.679224	0.814023	C1
GSE25534	GSM627657_ch1	0.594167	0.27463	C2
GSE25534	GSM627658_ch1	0.616888	0.420587	C2
GSE25534	GSM627659_ch1	0.592311	0.263884	C3
GSE25534	GSM627660_ch1	0.625353	0.47929	C2
GSE25534	GSM627661_ch1	0.768016	0.992857	C1
GSE25534	GSM627662_ch1	0.734363	0.968544	C1
GSE25534	GSM627663_ch1	0.716371	0.938738	C1
GSE25534	GSM627664_ch1	0.696001	0.882392	C2
GSE25534	GSM627665_ch1	0.633672	0.537425	C3
GSE25534	GSM627666_ch1	0.717796	0.941706	C1
GSE25534	GSM627667_ch1	0.670084	0.768072	C3
GSE25534	GSM627668_ch1	0.661512	0.71978	C2
GSE25534	GSM627669_ch1	0.657081	0.69304	C3
GSE25534	GSM627670_ch1	0.705347	0.911642	C2
GSE25534	GSM627690_ch1	0.733668	0.96767	C2
GSE25534	GSM627691_ch1	0.648198	0.636344	C2
GSE25534	GSM627692_ch1	0.65203	0.661257	C2
GSE25534	GSM627693_ch1	0.681334	0.823769	C2
GSE25534	GSM627671_ch2	0.652312	0.663067	C2
GSE25534	GSM627672_ch2	0.652624	0.665059	C2
GSE25534	GSM627673_ch2	0.633144	0.533747	C3
GSE25534	GSM627674_ch2	0.530293	0.0428032	C3
GSE25534	GSM627675_ch2	0.643903	0.607719	C3
GSE25534	GSM627676_ch2	0.636225	0.555168	C2
GSE25534	GSM627677_ch2	0.636286	0.555585	C1
GSE25534	GSM627678_ch2	0.669149	0.763042	C2
GSE25534	GSM627679_ch2	0.629342	0.507188	C2
GSE25534	GSM627680_ch2	0.654442	0.676598	C2
GSE25534	GSM627681_ch2	0.61094	0.380294	C3
GSE25534	GSM627682_ch2	0.656287	0.688131	C1
GSE25534	GSM627683_ch2	0.642866	0.60071	C3
GSE25534	GSM627684_ch2	0.652357	0.663354	C3
GSE25534	GSM627685_ch2	0.707742	0.91818	C2
GSE25534	GSM627686_ch2	0.695789	0.881659	C1
GSE25534	GSM627687_ch2	0.682933	0.830931	C1
GSE25534	GSM627688_ch2	0.667082	0.751705	C3
GSE25534	GSM627689_ch2	0.670812	0.77195	C1
GSE25534	GSM627694_ch2	0.664211	0.735498	C1
GSE25534	GSM627695_ch2	0.638273	0.569316	C3
GSE28623	GSM709417	0.746523	0.980916	C1
GSE28623	GSM709421	0.623248	0.464598	C3
GSE28623	GSM709422	0.594286	0.275328	C3
GSE28623	GSM709424	0.778341	0.995744	C1
GSE28623	GSM709426	0.605572	0.345004	C3
GSE28623	GSM709427	0.653173	0.668562	C3
GSE28623	GSM709431	0.654114	0.674526	C1
GSE28623	GSM709434	0.680235	0.818733	C1
GSE28623	GSM709436	0.585238	0.22499	C3
GSE28623	GSM709439	0.589229	0.246528	C3
GSE28623	GSM709447	0.656545	0.689729	C3
GSE28623	GSM709449	0.602592	0.325953	C3
GSE28623	GSM709450	0.641151	0.589051	C3
GSE28623	GSM709452	0.633403	0.535553	C3
GSE28623	GSM709454	0.611394	0.383328	C3
GSE28623	GSM709455	0.856782	0.999969	C1
GSE28623	GSM709458	0.647145	0.629385	C1
GSE28623	GSM709459	0.609921	0.373507	C3
GSE28623	GSM709461	0.716413	0.938829	C2
GSE28623	GSM709464	0.695247	0.879764	C2
GSE28623	GSM709466	0.671735	0.776811	C2
GSE28623	GSM709467	0.54116	0.0631989	C3
GSE28623	GSM709469	0.674021	0.788597	C2
GSE28623	GSM709470	0.640661	0.585709	C3
GSE28623	GSM709471	0.669939	0.767296	C2
GSE28623	GSM709472	0.609959	0.373761	C2
GSE28623	GSM709473	0.654592	0.677542	C2
GSE28623	GSM709474	0.639764	0.57957	C2
GSE28623	GSM709475	0.680147	0.818323	C2
GSE28623	GSM709479	0.662022	0.722785	C2
GSE28623	GSM709482	0.727249	0.958634	C1
GSE28623	GSM709483	0.649377	0.644077	C2
GSE28623	GSM709485	0.635957	0.553308	C2
GSE28623	GSM709487	0.689284	0.857518	C1
GSE28623	GSM709488	0.609877	0.373213	C3
GSE28623	GSM709489	0.549292	0.0828961	C3
GSE28623	GSM709490	0.662674	0.726599	C2
GSE28623	GSM709501	0.657057	0.692892	C1
GSE28623	GSM709502	0.675799	0.797506	C1
GSE28623	GSM709503	0.665266	0.741517	C1
GSE28623	GSM709504	0.652992	0.667407	C2
GSE28623	GSM709505	0.681505	0.824541	C1
GSE28623	GSM709506	0.727288	0.958694	C1
GSE28623	GSM709507	0.749025	0.982868	C1
GSE28623	GSM709508	0.662464	0.725373	C3
GSE28623	GSM709510	0.635966	0.55337	C3
GSE62147	GSM1520380	0.581785	0.207246	C3
GSE62147	GSM1520381	0.708145	0.919246	C2
GSE62147	GSM1520382	0.630246	0.513507	C2
GSE62147	GSM1520383	0.635464	0.549887	C1
GSE62147	GSM1520384	0.610639	0.378287	C3
GSE62147	GSM1520385	0.632895	0.532008	C1
GSE62147	GSM1520386	0.661066	0.717141	C2
GSE62147	GSM1520387	0.633615	0.537026	C2
GSE62147	GSM1520388	0.586617	0.232306	C3
GSE62147	GSM1520389	0.591148	0.257262	C3
GSE62147	GSM1520390	0.54288	0.0670269	C3
GSE62147	GSM1520391	0.67686	0.802716	C1
GSE62147	GSM1520392	0.596482	0.288331	C3
GSE62147	GSM1520393	0.598701	0.30176	C3
GSE62147	GSM1520394	0.577399	0.185949	C3
GSE62147	GSM1520395	0.621667	0.453595	C2
GSE62147	GSM1520396	0.545079	0.0721822	C3
GSE62147	GSM1520397	0.644132	0.60926	C1
GSE62147	GSM1520398	0.575678	0.177976	C3
GSE62147	GSM1520399	0.726065	0.956761	C1
GSE62147	GSM1520400	0.658405	0.701147	C1
GSE62147	GSM1520401	0.654478	0.676825	C1
GSE62147	GSM1520402	0.613158	0.395193	C2
GSE62147	GSM1520403	0.714636	0.934967	C1
GSE62147	GSM1520404	0.604115	0.335637	C2
GSE62147	GSM1520405	0.678112	0.808753	C1
GSE62147	GSM1520406	0.657604	0.696255	C1
GSE62147	GSM1520407	0.681272	0.823486	C1
GSE81746	GSM2175018	0.692685	0.870525	C2
GSE81746	GSM2175019	0.700609	0.897573	C2
GSE81746	GSM2175020	0.64674	0.626699	C2
GSE81746	GSM2175021	0.582962	0.2132	C1
GSE81746	GSM2175022	0.669051	0.762509	C2
GSE81746	GSM2175023	0.606562	0.35142	C3
GSE62525	GSM1528364	0.659438	0.707405	C2
GSE62525	GSM1528365	0.625816	0.482526	C2
GSE62525	GSM1528366	0.687975	0.852285	C1
GSE62525	GSM1528367	0.668202	0.757885	C2
GSE62525	GSM1528368	0.572512	0.163881	C3
GSE62525	GSM1528369	0.645025	0.615256	C3
GSE62525	GSM1528370	0.674937	0.793213	C2
GSE62525	GSM1528371	0.573235	0.167034	C2
GSE62525	GSM1528372	0.626965	0.490558	C2
GSE62525	GSM1528373	0.653135	0.668318	C2
GSE62525	GSM1528374	0.579079	0.193938	C3
GSE62525	GSM1528375	0.649793	0.646789	C1
GSE62525	GSM1528376	0.683189	0.832064	C2
GSE62525	GSM1528377	0.649079	0.642129	C1
GSE89403	GSM2369703	0.618541	0.431955	C3
GSE89403	GSM2369705	0.613364	0.396584	C3
GSE89403	GSM2369707	0.659012	0.704831	C3
GSE89403	GSM2369709	0.632322	0.528014	C3
GSE89403	GSM2369711	0.605683	0.34572	C3
GSE89403	GSM2369713	0.666887	0.750621	C2
GSE89403	GSM2369715	0.600548	0.313145	C3
GSE89403	GSM2369717	0.647553	0.632086	C3
GSE89403	GSM2369719	0.644324	0.61055	C1
GSE89403	GSM2369721	0.688759	0.855433	C1
GSE89403	GSM2369723	0.638181	0.568686	C2
GSE89403	GSM2369725	0.629662	0.509426	C1
GSE89403	GSM2369727	0.640931	0.587553	C1
GSE89403	GSM2369729	0.657398	0.694986	C2
GSE89403	GSM2369731	0.621808	0.454575	C3
GSE89403	GSM2369733	0.635459	0.549851	C1
GSE89403	GSM2369735	0.633695	0.537583	C2
GSE89403	GSM2369737	0.670904	0.772437	C1
GSE89403	GSM2369739	0.63695	0.560185	C2
GSE89403	GSM2369741	0.640224	0.58272	C1
GSE89403	GSM2369743	0.624569	0.473809	C3
GSE89403	GSM2369745	0.645953	0.621464	C2
GSE89403	GSM2369747	0.597451	0.29416	C3
GSE89403	GSM2369749	0.631647	0.523299	C3
GSE89403	GSM2369751	0.643791	0.606963	C1
GSE89403	GSM2369753	0.723864	0.953099	C1
GSE89403	GSM2369755	0.652397	0.663612	C1
GSE89403	GSM2369757	0.643643	0.605967	C1
GSE89403	GSM2369759	0.704864	0.910277	C1
GSE89403	GSM2369761	0.599229	0.304997	C3
GSE89403	GSM2369763	0.561552	0.120832	C2
GSE89403	GSM2369767	0.589379	0.247357	C3
GSE89403	GSM2369769	0.731121	0.964302	C1
GSE89403	GSM2369771	0.554679	0.0982861	C3
GSE89403	GSM2369773	0.518478	0.0270366	C3
GSE89403	GSM2369775	0.581578	0.20621	C3
GSE89403	GSM2369777	0.660077	0.711247	C2
GSE89403	GSM2369779	0.66098	0.716629	C2
GSE89403	GSM2369781	0.632142	0.526756	C3
GSE89403	GSM2369783	0.704895	0.910365	C2
GSE89403	GSM2369785	0.620708	0.44694	C3
GSE89403	GSM2369787	0.63414	0.540685	C2
GSE89403	GSM2369789	0.629734	0.509925	C2
GSE89403	GSM2369791	0.607883	0.360052	C2
GSE89403	GSM2369793	0.601427	0.318626	C2
GSE89403	GSM2369795	0.57336	0.167581	C3
GSE89403	GSM2369797	0.664444	0.736833	C1
GSE89403	GSM2369799	0.649657	0.645906	C3
GSE89403	GSM2369801	0.665754	0.744275	C1
GSE89403	GSM2369803	0.636066	0.554063	C2
GSE89403	GSM2369805	0.730761	0.963804	C1
GSE89403	GSM2369807	0.611017	0.380805	C3
GSE89403	GSM2369809	0.632297	0.527836	C2
GSE89403	GSM2369811	0.643033	0.601842	C3
GSE89403	GSM2369813	0.703163	0.905348	C1
GSE89403	GSM2369815	0.588845	0.244406	C3
GSE89403	GSM2369817	0.625794	0.482366	C3
GSE89403	GSM2369819	0.560758	0.118054	C3
GSE89403	GSM2369821	0.64441	0.611129	C3
GSE89403	GSM2369823	0.567616	0.143553	C3
GSE89403	GSM2369825	0.553754	0.0955048	C3
GSE89403	GSM2369827	0.636381	0.556247	C2
GSE89403	GSM2369829	0.571306	0.158707	C3
GSE89403	GSM2369831	0.649073	0.642089	C1
GSE89403	GSM2369833	0.534751	0.0504123	C3
GSE89403	GSM2369835	0.718909	0.943945	C1
GSE89403	GSM2369837	0.604916	0.340776	C2
GSE89403	GSM2369839	0.585445	0.226079	C3
GSE89403	GSM2369841	0.65768	0.696717	C1
GSE89403	GSM2369843	0.67701	0.803445	C2
GSE89403	GSM2369845	0.631493	0.522221	C3
GSE89403	GSM2369847	0.651998	0.661053	C2
GSE89403	GSM2369849	0.649368	0.644016	C2
GSE89403	GSM2369851	0.653039	0.667709	C2
GSE89403	GSM2369853	0.606221	0.349208	C3
GSE89403	GSM2369855	0.624314	0.472034	C3
GSE89403	GSM2369857	0.662963	0.728288	C1
GSE89403	GSM2369859	0.631718	0.523796	C3
GSE89403	GSM2369861	0.677141	0.804078	C1
GSE89403	GSM2369863	0.726777	0.957896	C1
GSE89403	GSM2369865	0.61405	0.401229	C2
GSE89403	GSM2369867	0.679718	0.81633	C1
GSE89403	GSM2369869	0.614293	0.402876	C3
GSE89403	GSM2369871	0.569859	0.152643	C3
GSE89403	GSM2369873	0.600991	0.315905	C3
GSE89403	GSM2369875	0.643377	0.604169	C2
GSE89403	GSM2369877	0.722856	0.951342	C2
GSE89403	GSM2369879	0.636952	0.560199	C2
GSE89403	GSM2369881	0.643873	0.607518	C2
GSE89403	GSM2369883	0.605	0.341314	C2
GSE89403	GSM2369885	0.683616	0.833934	C1
GSE89403	GSM2369887	0.586619	0.232318	C3
GSE89403	GSM2369889	0.633556	0.536615	C2
GSE89403	GSM2369891	0.600065	0.310147	C3
GSE89403	GSM2369893	0.627573	0.49481	C2
GSE89403	GSM2369895	0.59604	0.285689	C3
GSE89403	GSM2369897	0.520375	0.0291808	C3
GSE89403	GSM2369899	0.633268	0.534611	C3
GSE89403	GSM2369901	0.65751	0.695678	C1
GSE89403	GSM2369903	0.624275	0.471762	C3
GSE89403	GSM2369905	0.624313	0.472024	C3
GSE89403	GSM2369907	0.647165	0.629522	C1
GSE89403	GSM2369909	0.642011	0.594911	C2
GSE89403	GSM2369911	0.656209	0.687648	C3
GSE89403	GSM2369913	0.610773	0.379179	C3
GSE89403	GSM2369915	0.585435	0.226024	C3
GSE89403	GSM2369917	0.644615	0.612507	C2
GSE89403	GSM2369919	0.59416	0.274589	C3
GSE89403	GSM2369921	0.509493	0.0185879	C3
GSE89403	GSM2369923	0.649935	0.647714	C1
GSE89403	GSM2369925	0.725358	0.955611	C1
GSE89403	GSM2369927	0.667375	0.75333	C1
GSE89403	GSM2369929	0.662456	0.725327	C1
GSE89403	GSM2369931	0.603232	0.330007	C2
GSE89403	GSM2369933	0.649907	0.647532	C1
GSE89403	GSM2369935	0.561697	0.121342	C3
GSE89403	GSM2369937	0.624093	0.47049	C2
GSE89403	GSM2369939	0.674706	0.792057	C1
GSE89403	GSM2369941	0.555972	0.102275	C3
GSE89403	GSM2369943	0.626931	0.49032	C2
GSE89403	GSM2369945	0.6167	0.419296	C3
GSE89403	GSM2369947	0.66564	0.743633	C1
GSE89403	GSM2369949	0.646791	0.627041	C1
GSE89403	GSM2369951	0.631561	0.522698	C2
GSE89403	GSM2369953	0.736142	0.970688	C1
GSE89403	GSM2369955	0.641183	0.589273	C2
GSE89403	GSM2369957	0.575434	0.176864	C3
GSE89403	GSM2369959	0.648513	0.638411	C2
GSE89403	GSM2369963	0.6061	0.348422	C3
GSE89403	GSM2369965	0.643461	0.604738	C1
GSE89403	GSM2369967	0.589297	0.246902	C3
GSE89403	GSM2369969	0.615063	0.408115	C2
GSE89403	GSM2369971	0.648698	0.639626	C1
GSE89403	GSM2369973	0.674137	0.789183	C1
GSE89403	GSM2369975	0.61913	0.436016	C3
GSE89403	GSM2369977	0.623376	0.465487	C3
GSE89403	GSM2369979	0.604377	0.33731	C1
GSE89403	GSM2369981	0.663648	0.732258	C1
GSE89403	GSM2369983	0.558101	0.109094	C3
GSE89403	GSM2369985	0.622613	0.460175	C3
GSE89403	GSM2369987	0.597395	0.293822	C2
GSE89403	GSM2369989	0.578521	0.191265	C3
GSE89403	GSM2369991	0.617154	0.422408	C3
GSE89403	GSM2369993	0.625352	0.479283	C1
GSE89403	GSM2369995	0.700998	0.898787	C1
GSE89403	GSM2369997	0.628229	0.499398	C3
GSE89403	GSM2369999	0.666786	0.750061	C1
GSE89403	GSM2370001	0.517868	0.0263756	C3
GSE89403	GSM2370003	0.603319	0.330559	C3
GSE89403	GSM2370005	0.594554	0.276901	C3
GSE89403	GSM2370007	0.606097	0.348402	C3
GSE89403	GSM2370009	0.631235	0.520424	C1
GSE89403	GSM2370011	0.662897	0.7279	C1
GSE89403	GSM2370013	0.575678	0.177976	C1
GSE89403	GSM2370015	0.604505	0.338135	C3
GSE89403	GSM2370025	0.673386	0.785363	C1
GSE89403	GSM2370027	0.654692	0.678168	C2
GSE89403	GSM2370029	0.636189	0.554915	C3
GSE89403	GSM2370031	0.651628	0.658677	C1
GSE89403	GSM2370033	0.625922	0.483266	C3
GSE89403	GSM2370035	0.706434	0.914658	C1
GSE89403	GSM2370037	0.702502	0.903377	C1
GSE89403	GSM2370039	0.664549	0.73743	C1
GSE89403	GSM2370041	0.650487	0.651306	C1
GSE89403	GSM2370043	0.657717	0.696942	C2
GSE89403	GSM2370045	0.611769	0.385846	C3
GSE89403	GSM2370047	0.608058	0.361201	C3
GSE89403	GSM2370049	0.626634	0.48824	C2
GSE89403	GSM2370051	0.642521	0.598372	C2
GSE89403	GSM2370053	0.608029	0.361009	C3
GSE89403	GSM2370055	0.625552	0.480678	C3
GSE89403	GSM2370057	0.627663	0.495438	C1
GSE89403	GSM2370059	0.659535	0.707987	C1
GSE89403	GSM2370061	0.644706	0.613116	C1
GSE89403	GSM2370063	0.615293	0.409677	C3
GSE89403	GSM2370077	0.6521	0.66171	C2
GSE89403	GSM2370079	0.66766	0.754908	C2
GSE89403	GSM2370081	0.585501	0.226374	C3
GSE89403	GSM2370083	0.610601	0.378029	C3
GSE89403	GSM2370085	0.686135	0.84471	C1
GSE89403	GSM2370087	0.721031	0.948025	C1
GSE89403	GSM2370089	0.683678	0.834206	C1
GSE89403	GSM2370091	0.646459	0.62483	C1
GSE89403	GSM2370093	0.649933	0.647704	C2
GSE89403	GSM2370095	0.729674	0.962264	C1
GSE89403	GSM2370097	0.676671	0.801794	C2
GSE89403	GSM2370099	0.692661	0.870436	C2
GSE89403	GSM2370101	0.6451	0.615764	C1
GSE89403	GSM2370103	0.690955	0.864016	C1
GSE89403	GSM2370105	0.57025	0.154265	C3
GSE89403	GSM2370107	0.627612	0.495079	C2
GSE89403	GSM2370109	0.614536	0.40453	C3
GSE89403	GSM2370111	0.605653	0.345524	C3
GSE89403	GSM2370113	0.500527	0.012511	C3
GSE89403	GSM2370115	0.469871	0.00272898	C3
GSE89403	GSM2370195	0.68155	0.824747	C2
GSE89403	GSM2370197	0.765309	0.991858	C1
GSE89403	GSM2370199	0.690511	0.862311	C1
GSE89403	GSM2370201	0.649958	0.647866	C2
GSE89403	GSM2370203	0.594765	0.278139	C3
GSE89403	GSM2370241	0.959352	1	C1
GSE89403	GSM2370243	0.682204	0.827689	C1
GSE89403	GSM2370245	0.621833	0.454749	C3
GSE89403	GSM2370247	0.616594	0.418569	C2
GSE89403	GSM2370273	0.614425	0.403773	C3
GSE89403	GSM2370275	0.611338	0.382955	C3
GSE89403	GSM2370277	0.603499	0.331705	C2
GSE89403	GSM2370285	0.646236	0.623351	C2
GSE89403	GSM2370287	0.633265	0.534586	C2
GSE89403	GSM2370289	0.569653	0.151795	C3
GSE89403	GSM2370291	0.582165	0.209156	C3
GSE89403	GSM2370293	0.649721	0.646322	C1
GSE89403	GSM2370295	0.662808	0.727383	C1
GSE89403	GSM2370297	0.627845	0.496715	C1
GSE89403	GSM2370299	0.644109	0.609103	C2
GSE89403	GSM2370301	0.652194	0.662311	C1
GSE89403	GSM2370303	0.683349	0.832766	C1
GSE89403	GSM2370305	0.682148	0.827438	C2
GSE89403	GSM2370307	0.660001	0.710789	C2
GSE89403	GSM2370309	0.739554	0.974462	C1
GSE89403	GSM2370311	0.727376	0.95883	C1
GSE89403	GSM2370313	0.681649	0.825195	C1
GSE89403	GSM2370315	0.591482	0.259157	C3
GSE89403	GSM2370317	0.607851	0.359843	C3
GSE89403	GSM2370319	0.672926	0.782998	C1
GSE89403	GSM2370321	0.691017	0.864254	C2
GSE89403	GSM2370323	0.668808	0.76119	C1
GSE89403	GSM2370325	0.647735	0.633287	C1
GSE89403	GSM2370327	0.593135	0.268627	C3
GSE89403	GSM2370329	0.614377	0.403449	C3
GSE89403	GSM2370331	0.580885	0.20276	C3
GSE89403	GSM2370333	0.555043	0.0993955	C3
GSE89403	GSM2370335	0.630824	0.517549	C2
GSE89403	GSM2370337	0.677644	0.806509	C2
GSE89403	GSM2370339	0.615754	0.412826	C2
GSE89403	GSM2370341	0.60694	0.353886	C2
GSE89403	GSM2370343	0.664249	0.735713	C1
GSE89403	GSM2370345	0.682403	0.82858	C1
GSE89403	GSM2370347	0.501289	0.0129502	C3
GSE89403	GSM2370349	0.558693	0.111047	C3
GSE89403	GSM2370351	0.640176	0.582393	C1
GSE89403	GSM2370353	0.556069	0.102576	C3
GSE89403	GSM2370355	0.616493	0.41788	C3
GSE89403	GSM2370357	0.694579	0.877403	C1
GSE89403	GSM2370359	0.650194	0.6494	C1
GSE89403	GSM2370361	0.655875	0.685567	C2
GSE89403	GSM2370363	0.647342	0.630692	C1
GSE89403	GSM2370365	0.665905	0.745124	C1
GSE89403	GSM2370367	0.623906	0.469186	C3
GSE89403	GSM2370369	0.652624	0.66506	C1
GSE89403	GSM2370371	0.697588	0.88779	C1
GSE89403	GSM2370373	0.647647	0.632706	C3
GSE89403	GSM2370375	0.675816	0.797592	C1
GSE89403	GSM2370377	0.630739	0.516952	C2
GSE89403	GSM2370379	0.639088	0.574929	C2
GSE89403	GSM2370381	0.661756	0.721218	C2
GSE89403	GSM2370383	0.715849	0.937623	C2
GSE89403	GSM2370385	0.62215	0.456952	C2
GSE89403	GSM2370387	0.705399	0.911788	C1
GSE89403	GSM2370389	0.634991	0.5466	C3
GSE89403	GSM2370391	0.662762	0.727118	C2
GSE89403	GSM2370393	0.647469	0.631528	C1
GSE89403	GSM2370395	0.658643	0.702594	C2
GSE89403	GSM2370397	0.683938	0.835338	C1
GSE89403	GSM2370399	0.666928	0.750852	C1
GSE89403	GSM2370401	0.612083	0.387953	C2
GSE89403	GSM2370403	0.661574	0.720149	C1
GSE89403	GSM2370405	0.685902	0.843734	C1
GSE89403	GSM2370407	0.675982	0.798412	C2
GSE89403	GSM2370409	0.618644	0.432659	C3
GSE89403	GSM2370411	0.648808	0.640351	C2
GSE89403	GSM2370413	0.631722	0.523821	C3
GSE89403	GSM2370415	0.723821	0.953026	C1
GSE89403	GSM2370417	0.668414	0.759044	C1
GSE89403	GSM2370419	0.656939	0.692166	C1
GSE89403	GSM2370421	0.631234	0.520417	C2
GSE89403	GSM2370423	0.630318	0.514014	C2
GSE89403	GSM2370425	0.61664	0.418882	C3
GSE89403	GSM2370427	0.632342	0.528149	C2
GSE89403	GSM2370429	0.639194	0.575657	C3
GSE89403	GSM2370431	0.641792	0.59342	C3
GSE89403	GSM2370433	0.627419	0.493731	C2
GSE89403	GSM2370435	0.615788	0.413057	C2
GSE89403	GSM2370437	0.577192	0.184976	C3
GSE89403	GSM2370439	0.63451	0.543257	C1
GSE89403	GSM2370441	0.636765	0.558904	C1
GSE89403	GSM2370443	0.618055	0.428604	C3
GSE89403	GSM2370445	0.663266	0.730047	C2
GSE89403	GSM2370447	0.644377	0.610911	C1
GSE89403	GSM2370449	0.633868	0.538791	C2
GSE89403	GSM2370451	0.653236	0.668961	C1
GSE89403	GSM2370453	0.597571	0.294887	C3
GSE89403	GSM2370455	0.580408	0.200409	C3
GSE89403	GSM2370457	0.6579	0.698067	C2
GSE89403	GSM2370459	0.631091	0.519415	C3
GSE89403	GSM2370461	0.648647	0.639297	C2
GSE89403	GSM2370463	0.555374	0.100415	C3
GSE89403	GSM2370465	0.666826	0.750285	C1
GSE89403	GSM2370467	0.61933	0.4374	C3
GSE89403	GSM2370469	0.629055	0.50518	C3
GSE89403	GSM2370471	0.636011	0.553681	C2
GSE89403	GSM2370473	0.717738	0.941588	C1
GSE89403	GSM2370475	0.72794	0.959695	C1
GSE89403	GSM2370477	0.692387	0.86942	C1
GSE89403	GSM2370479	0.65643	0.689017	C1
GSE89403	GSM2370481	0.713224	0.931766	C1
GSE89403	GSM2370483	0.574592	0.173054	C3
GSE89403	GSM2370485	0.63245	0.528903	C3
GSE89403	GSM2370487	0.624455	0.473012	C3
GSE89403	GSM2370489	0.65537	0.682419	C1
GSE89403	GSM2370491	0.622148	0.45694	C3
GSE89403	GSM2370493	-0.040648	4.37677e-32	C3
GSE89403	GSM2370495	0.645201	0.616439	C1
GSE89403	GSM2370497	0.66605	0.745944	C1
GSE89403	GSM2370499	0.648076	0.635538	C2
GSE89403	GSM2370501	0.630332	0.514111	C2
GSE89403	GSM2370503	0.581182	0.204236	C3
GSE89403	GSM2370505	0.642187	0.596109	C2
GSE89403	GSM2370507	0.682413	0.828623	C1
GSE89403	GSM2370509	0.609549	0.371037	C3
GSE89403	GSM2370511	0.673168	0.784245	C1
GSE89403	GSM2370513	0.72557	0.955959	C1
GSE89403	GSM2370515	0.650978	0.654483	C1
GSE89403	GSM2370517	0.702707	0.903992	C1
GSE89403	GSM2370519	0.635963	0.55335	C2
GSE89403	GSM2370521	0.682408	0.828602	C1
GSE89403	GSM2370523	0.59836	0.299676	C3
GSE89403	GSM2370525	0.666112	0.746288	C1
GSE89403	GSM2370527	0.764069	0.991362	C1
GSE89403	GSM2370529	0.582893	0.212847	C3
GSE89403	GSM2370531	0.595006	0.27956	C3
GSE89403	GSM2370533	0.658671	0.702762	C1
GSE89403	GSM2370535	0.562338	0.123626	C3
GSE89403	GSM2370537	0.589999	0.250806	C3
GSE89403	GSM2370539	0.589929	0.250417	C3
GSE89403	GSM2370541	0.625359	0.47933	C2
GSE89403	GSM2370543	0.604838	0.340271	C3
GSE89403	GSM2370545	0.491295	0.00813134	C3
GSE89403	GSM2370547	0.67201	0.778249	C2
GSE89403	GSM2370549	0.48772	0.00683808	C3
GSE89403	GSM2370551	0.569043	0.149291	C3
GSE89403	GSM2370553	0.655715	0.684575	C1
GSE89403	GSM2370555	0.686871	0.84777	C1
GSE89403	GSM2370557	0.699414	0.89378	C1
GSE89403	GSM2370559	0.711705	0.92819	C1
GSE89403	GSM2370561	0.669686	0.765938	C2
GSE89403	GSM2370563	0.719045	0.944214	C1
GSE89403	GSM2370565	0.642744	0.599884	C2
GSE89403	GSM2370567	0.653104	0.668123	C2
GSE89403	GSM2370569	0.714238	0.934077	C1
GSE89403	GSM2370571	0.667961	0.75656	C1
GSE89403	GSM2370573	0.622622	0.460236	C3
GSE89403	GSM2370575	0.734126	0.968248	C1
GSE89403	GSM2370577	0.639547	0.578081	C3
GSE89403	GSM2370579	0.645814	0.620536	C2
GSE89403	GSM2370581	0.624036	0.470093	C3
GSE89403	GSM2370583	0.631075	0.519304	C3
GSE89403	GSM2370585	0.639031	0.574532	C2
GSE89403	GSM2370587	0.662022	0.722782	C1
GSE89403	GSM2370589	0.639581	0.57831	C3
GSE89403	GSM2370591	0.664488	0.737084	C1
GSE89403	GSM2370593	0.60245	0.32506	C3
GSE89403	GSM2370595	0.691006	0.864211	C1
GSE89403	GSM2370597	0.626559	0.48772	C3
GSE89403	GSM2370599	0.623509	0.466417	C2
GSE89403	GSM2370601	0.640984	0.587912	C1
GSE89403	GSM2370603	0.649051	0.641942	C1
GSE89403	GSM2370605	0.596694	0.2896	C3
GSE89403	GSM2370607	0.619352	0.437549	C3
GSE89403	GSM2370609	0.654558	0.677326	C1
GSE89403	GSM2370611	0.666387	0.747835	C1
GSE89403	GSM2370613	0.583782	0.217406	C3
GSE89403	GSM2370615	0.628345	0.50021	C3
GSE94438	GSM2475317	0.676473	0.800822	C1
GSE94438	GSM2475318	0.837625	0.999879	C1
GSE94438	GSM2475323	0.673102	0.783906	C1
GSE94438	GSM2475328	0.613469	0.397296	C2
GSE94438	GSM2475330	0.557964	0.108645	C3
GSE94438	GSM2475337	0.599509	0.306716	C3
GSE94438	GSM2475339	0.638687	0.572169	C3
GSE94438	GSM2475345	0.528765	0.0404185	C3
GSE94438	GSM2475352	0.703091	0.905135	C1
GSE94438	GSM2475358	0.645078	0.615612	C2
GSE94438	GSM2475364	0.615014	0.40778	C3
GSE94438	GSM2475366	0.640302	0.583256	C2
GSE94438	GSM2475369	0.623783	0.468325	C3
GSE94438	GSM2475376	0.595244	0.280963	C3
GSE94438	GSM2475378	0.634152	0.540768	C3
GSE94438	GSM2475381	0.523799	0.033406	C3
GSE94438	GSM2475392	0.719288	0.944692	C1
GSE94438	GSM2475394	0.597008	0.291488	C3
GSE94438	GSM2475398	0.600988	0.315886	C3
GSE94438	GSM2475403	0.661039	0.716981	C1
GSE94438	GSM2475406	0.652215	0.662445	C2
GSE94438	GSM2475408	0.661749	0.721181	C1
GSE94438	GSM2475413	0.649787	0.646754	C1
GSE94438	GSM2475421	0.61447	0.404078	C3
GSE94438	GSM2475424	0.657039	0.692778	C1
GSE94438	GSM2475426	0.682615	0.829525	C1
GSE94438	GSM2475432	0.610531	0.377564	C3
GSE94438	GSM2475435	0.622768	0.461255	C2
GSE94438	GSM2475439	0.632764	0.531096	C2
GSE94438	GSM2475445	0.646398	0.624431	C3
GSE94438	GSM2475447	0.597657	0.295406	C3
GSE94438	GSM2475453	0.596684	0.289545	C3
GSE94438	GSM2475458	0.905064	0.999999	C1
GSE94438	GSM2475460	0.605375	0.343733	C3
GSE94438	GSM2475469	0.610986	0.380601	C3
GSE94438	GSM2475472	0.610574	0.377853	C3
GSE94438	GSM2475474	0.650017	0.648249	C1
GSE94438	GSM2475487	0.670151	0.768434	C1
GSE94438	GSM2475494	0.714869	0.935484	C1
GSE94438	GSM2475495	0.604302	0.336832	C2
GSE94438	GSM2475497	0.639139	0.57528	C2
GSE94438	GSM2475505	0.550935	0.0873848	C3
GSE94438	GSM2475506	0.663714	0.732636	C2
GSE94438	GSM2475511	0.589895	0.250225	C3
GSE94438	GSM2475523	0.5886	0.243057	C3
GSE94438	GSM2475526	0.6127	0.392105	C1
GSE94438	GSM2475529	0.656607	0.690111	C2
GSE94438	GSM2475532	0.640583	0.585173	C1
GSE94438	GSM2475536	0.653737	0.672145	C2
GSE94438	GSM2475540	0.596954	0.291167	C3
GSE94438	GSM2475544	0.636945	0.560148	C1
GSE94438	GSM2475545	0.654823	0.67899	C1
GSE94438	GSM2475552	0.64755	0.632069	C1
GSE94438	GSM2475561	0.745743	0.980271	C1
GSE94438	GSM2475564	0.682783	0.83027	C1
GSE94438	GSM2475570	0.585133	0.224438	C3
GSE94438	GSM2475571	0.623579	0.466904	C2
GSE94438	GSM2475576	0.642722	0.599739	C1
GSE94438	GSM2475582	0.745491	0.980059	C1
GSE94438	GSM2475584	0.638422	0.570345	C1
GSE94438	GSM2475589	0.612825	0.392943	C3
GSE94438	GSM2475600	0.605006	0.341349	C3
GSE94438	GSM2475610	0.643907	0.607745	C1
GSE94438	GSM2475613	0.609093	0.368018	C3
GSE94438	GSM2475619	0.588546	0.242763	C3
GSE94438	GSM2475624	0.639952	0.580856	C1
GSE94438	GSM2475633	0.65065	0.652358	C1
GSE94438	GSM2475635	0.653966	0.673593	C1
GSE94438	GSM2475638	0.651741	0.659405	C1
GSE94438	GSM2475640	0.624511	0.473404	C3
GSE94438	GSM2475647	0.639562	0.578182	C1
GSE94438	GSM2475657	0.705071	0.910863	C1
GSE94438	GSM2475658	0.676491	0.800911	C1
GSE94438	GSM2475661	0.592361	0.26417	C3
GSE94438	GSM2475667	0.625261	0.478642	C3
GSE94438	GSM2475673	0.636736	0.558703	C2
GSE94438	GSM2475675	0.673629	0.786601	C1
GSE94438	GSM2475681	0.63582	0.552359	C2
GSE94438	GSM2475689	0.646091	0.622384	C1
GSE94438	GSM2475692	0.646789	0.627027	C2
GSE94438	GSM2475694	0.539972	0.060654	C3
GSE94438	GSM2475697	0.662418	0.725108	C2
GSE94438	GSM2475701	0.632129	0.526669	C2
GSE94438	GSM2475702	0.651276	0.656409	C1
GSE94438	GSM2475703	0.634737	0.544839	C3
GSE94438	GSM2475708	0.63062	0.516122	C2
GSE94438	GSM2475713	0.706763	0.915553	C1
GSE94438	GSM2475716	0.672748	0.782079	C2
GSE94438	GSM2475718	0.61584	0.413415	C3
GSE94438	GSM2475719	0.602486	0.325285	C3
GSE94438	GSM2475720	0.590706	0.254767	C3
GSE94438	GSM2475725	0.631738	0.523938	C3
GSE94438	GSM2475729	0.665551	0.743129	C2
GSE94438	GSM2475731	0.744787	0.979455	C1
GSE94438	GSM2475732	0.620641	0.446475	C3
GSE94438	GSM2475733	0.688616	0.854862	C1
GSE94438	GSM2475735	0.570583	0.155658	C3
GSE94438	GSM2475741	0.608634	0.36499	C3
GSE107104	GSM2861312	0.57878	0.192501	C3
GSE107104	GSM2861313	0.65276	0.665929	C3
GSE107104	GSM2861314	0.70821	0.919416	C2
GSE107104	GSM2861315	0.712539	0.930171	C1
GSE107104	GSM2861316	0.678339	0.809835	C1
GSE107104	GSM2861317	0.610747	0.379005	C3
GSE107104	GSM2861318	0.677874	0.807615	C1
GSE107104	GSM2861319	0.657051	0.692857	C1
GSE107104	GSM2861320	0.645457	0.61815	C3
GSE107104	GSM2861321	0.660391	0.713121	C2
GSE107104	GSM2861322	0.640347	0.583563	C3
GSE107104	GSM2861323	0.644243	0.610008	C1
GSE107104	GSM2861324	0.673156	0.784182	C1
GSE107104	GSM2861325	0.696668	0.884683	C1
GSE107104	GSM2861326	0.671599	0.776102	C2
GSE107104	GSM2861343	0.629955	0.511477	C3
GSE107104	GSM2861344	0.698653	0.891315	C1
GSETornheim	SRR10424399	0.72064	0.94729	C1
GSETornheim	SRR10424400	0.793235	0.998088	C1
GSETornheim	SRR10424401	0.63976	0.579537	C2
GSETornheim	SRR10424403	0.575519	0.177251	C2
GSETornheim	SRR10424404	0.597852	0.296591	C2
GSETornheim	SRR10424405	0.705796	0.912897	C1
GSETornheim	SRR10424406	0.64642	0.624571	C2
GSETornheim	SRR10424407	0.632282	0.527732	C3
GSETornheim	SRR10424408	0.647465	0.631506	C1
GSETornheim	SRR10424409	0.687026	0.848411	C2
GSETornheim	SRR10424414	0.619119	0.435941	C3
GSETornheim	SRR10424415	0.643572	0.605488	C1
GSETornheim	SRR10424416	0.615282	0.409605	C2
GSETornheim	SRR10424432	0.653282	0.669253	C2
GSETornheim	SRR10424465	0.599145	0.304477	C3
GSETornheim	SRR10424466	0.623023	0.463026	C3
GSETornheim	SRR10424467	0.62821	0.499268	C2
GSETornheim	SRR10424468	0.644994	0.615052	C1
