# Supplementary material
Source: publisher site journal article supplement (doi:10.18632/aging.206048)
Supplement: Supplementary file 4 [file aging-v16-206048-supplementary-material-SD5.xlsx]

## Sheet: CIBERSORT
Supplementary Table 4. Cellular fractions in each patient estimated by ESTIMATE and xCell deconvolution tools.
	B cells naive	B cells memory	Plasma cells	T cells CD8	T cells CD4 naive	T cells CD4 memory resting	T cells CD4 memory activated	T cells follicular helper	T cells regulatory (Tregs)	T cells gamma delta	NK cells resting	NK cells activated	Monocytes	Macrophages M0	Macrophages M1	Macrophages M2	Dendritic cells resting	Dendritic cells activated	Mast cells resting	Mast cells activated	Eosinophils	Neutrophils
GSM1008078	0.0308732	0.012276	0.00132844	0.14493	0.0327057	0	0.00931501	0	0.0709631	0	0.171224	0	0.174109	0.0445259	0	0	0	0	0	0.013762	0	0.293988
GSM1008079	0	0.00319896	0	0.131674	0	0	0.0534202	0	0	0	0.212918	0	0.318406	0.0302719	0	0	0	0	0	0	0	0.250111
GSM1008080	0.0135765	0	0	0.139014	0.0315465	0	0.0293659	0	0.0254994	0	0.0475877	0.01235	0.235852	0.023274	0	0	0	0	0	0.0536368	0	0.388297
GSM1008081	0.0476652	0.013492	0.0383307	0.360589	0.116499	0	0.0830698	0	0	0	0.0868381	0	0.107022	0	0	0	0	0.00195072	0.00979031	0	0	0.134753
GSM1008082	0.0141127	0	0.00194369	0.196896	0.0888038	0	0.0393654	0	0.0287625	0	0.24729	0	0.250494	0.00771714	0	0	0	0.0136751	0	0.00942568	0	0.101514
GSM1008083	0.022662	0	0.00117544	0.040097	0.132221	0	0.00874373	0	0.00729514	0	0.0633845	0	0.331615	0.0258523	0	0	0	0.00330697	0	0.00524877	0	0.358398
GSM1008084	0	0.0126787	0	0.125665	0.0748891	0.0119773	0.0103091	0	0.0379635	0	0.065615	0.00592124	0.33111	0.0105447	0	0	0	0.00265398	0	0	0.0365389	0.274133
GSM1008085	0.00337735	0.00982838	0	0.162626	0.03879	0.00708016	0.0605441	0	0	0	0.0881164	0.000348068	0.24208	0.0022687	0	0	0	0.00184692	0	0	0.00391205	0.379182
GSM1008086	0	0	0	0	0.0698881	0.00867105	0.0294531	0	0.00794609	0.00903127	0.0521404	0	0.244442	0	0	0	0.00221075	0.0136684	0	0.0306059	0	0.531943
GSM1892913	0	0.0146156	0.00318886	0.0201191	0.152507	0.0301017	0.03196	0	0	0	0.0534607	0	0.262158	0.0495326	0	0	0	0.00524466	0	0.03082	0	0.346291
GSM1892914	0	0.0100892	0	0.242678	0.101815	0.103749	0.00156979	0	0.039652	0	0.0610334	0.0354359	0.203516	0.0106947	0	0	0	0.000544686	0	0.00435868	0	0.184863
GSM1892915	0	0.0023976	0	0.0603642	0.0687335	0	0.0198881	0	0	0	0.0468673	0	0.131609	0.0381365	0	0	0	0.00262401	0	0.00558189	0	0.623798
GSM1892916	0.00646528	0.00356431	0	0.0310069	0.111793	0.0143208	0.0227158	0	0	0	0.0444805	0	0.363811	0	0	0	0	0.00842601	0	0.000938801	0	0.392477
GSM1892917	0	0.00896127	0	0.111401	0.0126033	0	0.0555141	0	0	0	0.0747711	0.00403201	0.16525	0	0	0	0	0.00198939	0.0037767	0	0	0.561701
GSM1892918	0.00524704	0.0145995	0.0157356	0.233311	0.044418	0	0.0669356	0	0	0	0.125097	0.0126506	0.267779	0	0	0	0	0.00515551	0.0123947	0	0	0.196678
GSM1892919	0.00632931	0.000210841	0.00751456	0.100456	0.0537202	0	0.0330098	0	0	0	0.0549878	0	0.272784	0.0285991	0	0	0	0.00400662	0	0.0339649	0	0.404417
GSM1892920	0.0168652	0.00402505	0	0.12311	0.155823	0	0.038293	0	0.04508	0	0.127818	0	0.411129	0.0176016	0	0	0	0.00678792	0	0.00547188	0	0.0479947
GSM1892921	0.0153245	0.0135518	0	0.381165	0	0.0709337	0.0110296	0	0.00864761	0	0.190135	0	0.152273	0.00885244	0	0	0	0	0.00708789	0	0.0013772	0.139622
GSM1892922	0.015539	0	0.00662418	0.0841059	0.0735157	0	0.0790683	0	0	0	0.0749711	0	0.242721	0	0	0	0	0.0274846	0	0.00438125	0	0.391589
GSM1892923	0.0210603	0.00190179	0	0.115983	0	0	0.0603449	0	0.0079899	0	0.123112	0	0.289202	0	0	0	0	0.0111771	0	0.00371644	0	0.365513
GSM1892924	0.0258761	0.00803356	0	0.13412	0.114989	0	0.053303	0	0.0194852	0	0.178187	0	0.270975	0.0284351	0	0	0	0.0104407	0	0	0.0584735	0.097682
GSM1892925	0.014237	0	0	0.197456	0.0363198	0	0.0358851	0	0	0	0.130714	0	0.265765	0.0379065	0	0	0	0.0118079	0.00776123	0	0	0.262147
GSM1892926	0.0154563	0.00119848	0.0049796	0.064047	0.0886908	0.0737022	0.0450249	0	0.00565017	0	0.130948	0	0.280961	0.00124539	0	0	0	0.00251186	0	0.0104143	0	0.275171
GSM1892927	0.055271	0	0.0240581	0.0984559	0.0822112	0.0153836	0.00126948	0	0.0260381	0	0.0490831	0.00456773	0.33453	0.0297541	0	0	0	0	0	3.68486e-05	0	0.279341
GSM1892928	0.0240234	0	0	0.0543329	0.077416	0.0410699	0	0	0.031079	0.00398038	0.11488	0	0.273504	0.0858098	0	0	0	0.0069074	0	0.0611271	0	0.22587
GSM1892929	0.0128031	0	0	0.0723677	0.0542759	0	0	0	0.0340869	0	0.0220187	0.0444116	0.297848	0.0544314	0	0	0	0	0	0.0197045	0	0.388052
GSM1892930	0.0247335	0	0	0.114371	0.111942	0	0.0148474	0	0.00631705	0	0.0633607	0.0074076	0.27032	0.0314089	0	0	0	0	0	0.00692203	0	0.348369
GSM1892931	0	0	0	0.104207	0.029887	0	0.0364882	0	0	0	0.0439623	0.00602465	0.396006	0.0204256	0	0.000314887	0	0.00286153	0	0.00397541	0	0.355847
GSM1892932	0.0266541	0	0.00519822	0.082016	0.0566355	0	0.0374068	0	0.0114752	0	0.152539	0	0.39947	0.0460173	0	0	0	0	0.00946488	0	0.0146544	0.158469
GSM1892933	0.0180832	0.00241301	0	0.191818	0.0917542	0.00568896	0.0171757	0	0.0275036	0	0.194788	0.0211633	0.303454	0.00408609	0	0	0	0	0.0111537	0	0	0.110919
GSM1892934	0.0398545	0	1.07637e-05	0.14956	0.112812	0.0249048	0.0138168	0	0.00835315	0	0.07397	0	0.272508	0.00913798	0	0	0	0.00351218	0.00553876	0	0	0.286022
GSM1892935	0.0406385	0	0.00159018	0.157749	0	0	0.126735	0	0.00557591	0	0.334217	0	0.178256	0.00708138	0	0	0	0.00208143	0	0.0229644	0	0.123111
GSM1892936	0.0530627	0	0	0.113433	0.05032	0.0136126	0.00660341	0	0.0316475	0	0.0578197	0.000845977	0.227761	0.0780582	0	0.010231	0	0	0	0.0121473	0	0.344459
GSM1892937	0.0391309	0	0	0.107124	0.140414	0	0.0481438	0	0.0205167	0	0.22632	0	0.197483	0.0434464	0	0	0	0	0	0	0	0.177421
GSM1892938	0.0212031	0	0	0.15888	0.0511965	0	0.0169892	0	0	0	0.0632862	0.00638888	0.153039	0.0557026	0	0	0	0	0.00328848	0	0	0.470026
GSM1892939	0.0162014	0	0.0101104	0.0759164	0.0919958	0	0.0619104	0	0.0118631	0	0.226845	0	0.137241	0.0660869	0	0	0	0	0	0.0244514	0	0.277379
GSM1892940	0.0110938	0.0129701	0	0.056909	0.113805	0.0157546	0	0	0.0713509	0	0.096408	0	0.357987	0.010384	0.000555771	0	0	0.012463	0	0.0352674	0	0.205051
GSM1892941	0	0.00752215	0	0.0744234	0.0649808	0	0.118943	0	0	0	0.0968463	0.0392803	0.26894	0	0	0.0026136	0	0.00144814	0.021056	0	0	0.303946
GSM1892942	0	0.0211741	0	0.119132	0.0601827	0	0.00581292	0	0.038113	0	0.180791	0	0.256608	0	0	0	0	0.00423955	0	0.00580119	0	0.308146
GSM1892943	0	0.0167592	0	0.142811	0.113349	0.0475628	0	0	0.0636646	0	0.174815	0	0.296847	0	0	0	0	0.000686988	0.00664612	0	0.00631899	0.13054
GSM1892944	0.0208545	0	0.00729491	0.0722864	0.143568	0.0299425	0.0127279	0	0.0143425	0	0.0424441	0.0171846	0.305834	0	0	0	0	0.00414899	0.00110318	0	0	0.328269
GSM1892945	0	0.00585056	0	0.199489	0.0594093	0	0.118277	0	0	0	0.144466	0	0.162331	0.0134095	0	0	0	0.00124164	0.0131943	0	0	0.28233
GSM1892946	0.0211905	0	0	0.22149	0.0255228	0	0.0275435	0	0.0257644	0	0.102757	0	0.129821	0.00244697	0	0	0	0.00513528	0.0236095	0	0	0.414719
GSM1892947	0.00423704	0.00670366	0	0.0172393	0.0592451	0	0	0	0.0175691	0	0.0477169	0	0.22908	0.0265102	0	0	0	0.00467364	0	0.0278094	0	0.559216
GSM484449	0	0.0115661	0.00604372	0.0574665	0.0596601	0	0.0792556	0	0	0	0.107991	0	0.195677	0.0244152	0	0.00163158	0	0	0	0.0121198	0	0.444173
GSM484451	0	0.0138915	0	0.113736	0.0992818	0	0	0	0.0216635	0	0.069844	0.00883961	0.122142	0.0359973	0	0	0	0.000841017	0	0.00786577	0	0.505898
GSM484456	0.0371133	0	0	0.00813604	0.0598642	0.00293571	0.00281256	0	0.0165602	0	0.065644	0	0.328729	0.0339857	0	0	0	0.00287723	0	0.0631922	0	0.37815
GSM484459	0.00669327	0	0.00198783	0.0524673	0.0564144	0	0.0181928	0	0.0137005	0	0.118771	0.00268646	0.325799	0.0461278	0	0	0	0.00263679	0	0.0153068	0	0.339215
GSM484463	0.0279888	0	0.00020771	0.0762445	0.130654	0	0.0647725	0	0	0	0.0521819	0.017466	0.389711	0	0	0.0187962	0	0.0158948	0.00133698	0	0	0.204745
GSM484466	0	0.0161629	0	0.0172851	0.118886	0.0535103	0.100212	0	0	0	0.0685633	0.0325744	0.140013	0.00649446	0	0	0	0.00110866	0.0270005	0	0	0.41819
GSM484468	0.029477	0.0118135	0	0.17741	0.0925343	0	0.0361613	0	0.0445531	0	0.134785	0	0.249836	0	0	0	0	0.0139871	0.00459617	0	0	0.204847
GSM484470	0.00943813	0.00729753	0	0.348267	0	0.00598371	0.0809004	0	0.0280311	0	0.202586	0.0756992	0.153657	0	0	0.00292228	0	0	0.00895197	0	0	0.0762654
GSM484472	0.0142589	0.000840051	0	0	0.0865725	0.0130025	0	0	0.0531109	0	0.103156	0	0.206197	0.0904965	0	0	0	0.00992095	0	0.0290415	0.0126794	0.380723
GSM484474	0.0252349	0	0	0.0569614	0.115704	0	0.00943879	0	0.0303734	0	0.0814418	0	0.241312	0.0100917	0	0	0.00588335	0.00946078	0	0.0316507	0.00341519	0.379032
GSM484475	0	0	0.000178057	0.159238	0.0108358	0	0.0656222	0	0.00623175	0	0.118411	0	0.366576	0.0467996	0	0	0	0	0.00937644	0	0	0.216731
GSM484478	0.0357093	0	0	0.139796	0.140062	0.0077634	0	0	0.0231147	0	0.0683391	0.00541823	0.185565	0.012368	0	0	0	0.00177944	0.00557511	0	0	0.37451
GSM484485	0.0320313	0	0	0.204773	0.107202	0	0.0138166	0	0.0429246	0	0.0771204	0.00844018	0.252707	0.020435	0	0	0	0.00880482	0	0.0263484	0.00207528	0.203321
GSM484595	0	0.00888819	0.00961798	0.130073	0.0420757	0.00277068	0.0219244	0	0.0165824	0	0.0796446	0.000705683	0.341827	0	0	0	0	0.00348116	0	0	0	0.34241
GSM484596	0	0	0	0.0692311	0.0314839	0	0.0135998	0	0.0136624	0	0.0751844	0	0.291671	0.0346969	0	0	0	0.00158992	0	0.0405955	0	0.428285
GSM484597	0.0430497	0	0	0.27233	0.146857	0	0.0655295	0	0.0143305	0	0.135191	0	0.266903	0	0	0.0213421	0	0.00408982	0	0	0	0.0303771
GSM484598	0	0.0088141	0	0.0146965	0.0489904	0.0168144	0	0	0.0213959	0	0.0570047	0	0.205476	0.0934452	0	0	0	0	0	0.0276115	0	0.505751
GSM484605	0	0.0116821	0	0.163283	0.0685455	0.00334323	0.0355037	0	0	0	0.0901242	0.0125915	0.119092	0.0405537	0	0	0	0	0	0	0	0.455281
GSM484606	0	0.00539579	0	0.0779585	0.0575797	0	0.00784573	0	0.017017	0	0.0425784	0	0.281128	0.0386756	0	0	0	0.00523487	0	0.0246022	0	0.441984
GSM484610	0.0070848	0	0	0.244658	0	0	0	0	0.0403204	0	0.105188	0.0924171	0.27246	0	0	0	0	0.00314908	0.00205303	0	0	0.232669
GSM484611	0.0264147	0	0.00768273	0.0759075	0.0381487	0	0.0432145	0	0.0258194	0	0.000421624	0.0218978	0.332536	0	0.0016622	0	0	0.0189358	0	0.0152563	0	0.392103
GSM484618	0.00117275	0.0108953	0	0.173283	0.150267	0	0.00338239	0	0.0241535	0	0.132539	0	0.11189	0	0	0.00552766	0	0.00167804	0	0	0	0.385212
GSM484619	0.00905329	0	9.26453e-05	0.0923663	0.0909047	0	0.017486	0	0	0	0.0541681	0.0107561	0.334358	0	0	0	0	0.00367426	0	0.0104776	0	0.376663
GSM484620	0.0212179	0	0.00348027	0.175286	0.0662266	0	0.0705592	0	0	0	0.0646499	0.0541799	0.351089	0.0105039	0	0	0	0.00773338	0	0.0146606	0	0.160414
GSM484621	0.0241961	0	0.0129513	0.0883917	0.104754	0.0325593	0.0152248	0	0.0146059	0	0.0949742	0.00602387	0.302488	0.0517027	0	0	0	0	0	0.0122819	0	0.239846
GSM484628	0	0.001354	0.0211353	0.0906718	0.14901	0	0.0722488	0	0	0	0.148271	0.0816911	0.216762	0.0222748	0	0	0	0.00862836	0	0.00380585	0	0.184147
GSM484629	0.0286984	0	0	0.0708338	0.160999	0.0475661	0.0196219	0	0.0288117	0	0.137858	0	0.240637	0.0427907	0	0	0	0	0.0086211	0	0	0.213562
GSM484630	0.0196252	0	0	0.195679	0.147342	0	0.0529274	0	0.000176587	0	0.0829951	0.0385042	0.161082	0.0332165	0	0	0	0	0.00571419	0	0.0115342	0.251203
GSM484631	0	0.00431629	0	0.0284861	0.0448871	0	0.0229163	0	0	0	0.0861847	0	0.333918	0.0413813	0	0	0	0	0.0039616	0	0	0.433949
GSM484638	0.00408391	0	0	0.0925004	0.0652976	0	0.00596195	0	0.0309959	0	0.0536205	0.0143535	0.3734	0.0457579	0	0	0	0.00241862	0	0.0343633	0	0.277247
GSM484639	0.0098212	0.023728	0	0.191323	0.0878857	0	0.056419	0	0.00550411	0	0.0774894	0.0529761	0.154298	0.000348171	0	0	0	0.000671586	0.0118997	0	0	0.327636
GSM484641	0.0202071	0.00463863	0	0.249862	0.0750695	0	0.0904033	0	0	0	0.133884	0	0.190625	0.029567	0	0	0	0	0.0123504	0	0	0.193394
GSM484642	0.0166018	0.00202916	0	0.115163	0.0432993	0.0375995	0	0	0.048807	0	0.0905029	0.0198938	0.186818	0.0207215	0	0	0	0	0.00504882	0	0	0.413515
GSM484645	0.00129811	0.0251445	0.00159866	0.195462	0.0740148	0	0.0025595	0	0.0413884	0	0.024494	0.0197914	0.260357	0.023858	0	0	0	0.00374853	0.0142132	0	0	0.312072
GSM731200	0.000675113	0.00438026	0.002246	0.0847593	0.0773532	0	0.068671	0	0	0	0.137604	0	0.232857	0.0215219	0	0	0	0.00355634	0	0.0138748	0	0.352501
GSM731201	0	0.00610962	0	0.197758	0.130491	0	0	0	0.00564731	0	0.115965	0	0.103366	0.0219623	0	0	0	0	0	0.00215651	0	0.416545
GSM731203	0.0334016	0	0	0.0218391	0.0659581	0.00589466	0.00636738	0	0.02232	0	0.0493887	0	0.381254	0.0191149	0	0	0	0.00202645	0	0.0273943	0	0.365041
GSM731205	0.0037508	0.0186783	0	0.0696525	0.0720159	0	0.0188408	0	0.0446731	0	0.14595	0	0.307048	0.0176105	0	0	0	0.0114853	0	0.0104809	0	0.279813
GSM731207	0.0329348	0.0167372	0	0.113689	0.123437	0	0.0604905	0	0.0170009	0	0.0583225	0.0308088	0.324624	0	0	0.0365845	0	0.010096	0.00393974	0	0	0.171335
GSM731208	0	0.00235654	0	0.212234	0.0278858	0	0.0740229	0	0	0	0.0274321	0.10561	0.362286	0.0347763	0	0	0	0	0.0184312	0	0	0.134965
GSM731209	0.00352925	0	0.0111667	0.0751229	0.0844686	0	0.0251544	0	0.015482	0	0.062939	0	0.188709	0.0352414	0	0.0283199	0	0.00173979	0	0.0136215	0	0.454505
GSM731210	0.00779944	0	0	0.124255	0.101	0	0.0216706	0	0.0075438	0	0.0843108	0	0.283117	0	0	0	0	0.00263048	0	0	0	0.367673
GSM731212	0.0298397	0	0.00858118	0.234099	0.135823	0	0	0	0.0403763	0	0.101634	0.0430858	0.212173	0.0279157	0	0.0226014	0	0.00813844	0	0.00486641	0	0.130865
GSM914353	0	0.00874279	0	0.0548041	0.0792376	0.0482463	0.00698119	0	0.0046298	0	0.0101097	0.0275897	0.33764	0	0	0	0	0.00336492	0	0.00829321	0	0.410361
GSM914354	0.0133205	0.0103466	0	0.215248	0.0716239	0.00204909	0.00475569	0	0.0986785	0	0.031206	0.0844799	0.21566	0	0	0	0	7.88706e-05	0	0.00246154	0.00248976	0.247602
GSM914355	0	0.0393317	0	0.0620781	0.152051	0.0645485	0	0	0.10576	0	0.027336	0.0502588	0.337384	0	0	0	0	0.00732218	0	0.0127138	0	0.141216
GSM914356	0	0.00916177	0	0.143167	0.0581241	0.0262456	0	0	0.0447818	0	0.0258039	0.0788698	0.349035	0	0	0	0	0.000390778	0.00953925	0	0	0.254881
GSM914357	0	0.0185486	0	0.109374	0.0914472	0	0	0	0.0710343	0	0.0455268	0.129424	0.294137	0.000900265	0	0	0	0.0034653	0.00408608	0	0.00902029	0.223036
GSM914358	0	0.030567	0	0.138614	0.070314	0.134566	0.0270702	0	0.00873398	0	0.0262021	0.0695868	0.179488	0	0	0.0256583	0	0.00100117	0.00740858	0	0.00405168	0.276738
GSM914359	0.0126772	0.00223934	0	0.168877	0.111092	0.10357	0.0279995	0	0.0241209	0	0.0301992	0.0408298	0.218797	0	0	0.000954697	0	0.00111313	0.0113423	0	0	0.246188
GSM914360	0.0268347	0	0	0.101159	0.12267	0.0461228	0	0	0.0526529	0	0	0.083138	0.240068	0.0153241	0	0	0	0	0.0205127	0	0	0.291517
GSM914361	0	0.0065302	0	0.120518	0.0692391	0.0516324	0	0	0.0695751	0	0.0172971	0.0788957	0.266468	0.0166436	0	0	0	0	0	0.00455197	0	0.298649
GSM914362	0	0.0608584	0	0.137528	0.120608	0.0373409	0.0212126	0	0.019977	0	0	0.127206	0.335072	0	0	0.021678	0	0.0109282	0	0.0142879	0	0.0933027
GSM914363	0.0207133	0	0	0.0543909	0.0840802	0.0494953	0.000700411	0	0.0402287	0	0.0196996	0.0621004	0.321977	0.014252	0	0	0	0.00349048	0	0.0135903	0	0.315281
GSM914364	0	0.0127205	0	0.12196	0.100844	0.0809584	0	0	0.0452606	0	0.0114298	0.0883818	0.369119	0	0	0.00734923	0	0.000161564	0	0.000264919	0.0115441	0.150007
GSM914365	0	0.0200698	0.0191394	0.308101	0	0	0.0498962	0	0.0159042	0	0	0.200336	0.146138	0.0206412	0	3.96257e-06	0	0	0.0102163	0	0	0.209554
GSM914366	0	0.0152416	0.0203347	0.148327	0.0979317	0.0720419	0.0342706	0	0.0313553	0	0.0278192	0.0505066	0.251911	0	0	0	0	0.00101141	0.00491807	0	0	0.244331
GSM914367	0.0128355	0.00667894	0	0.0704432	0.0830205	0.0529153	0.00639877	0	0.0188301	0	0.0191016	0.0464673	0.321684	0	0	0	0	0.00372833	0	0.0134904	0	0.344406
GSM914368	0	0.0292856	0	0.0754739	0.0464912	0.0645132	0	0	0.0953613	0	0.0231807	0.100922	0.211526	0.0191906	0	0	0	0.00123771	0	0.0298109	0	0.303007
GSM914369	0	0.0103367	0	0.161468	0.0295095	0.00817118	0	0	0.0621184	0	0	0.144258	0.231625	0	0	0	0	0.00245035	0	0.00603339	0	0.344029
GSM914370	0.00655661	0.0116135	0	0.144195	0.1112	0.0290801	0	0	0.0683958	0	0.0502409	0.0761631	0.329871	0	0	0	0	0.00217168	0.00157105	0	0	0.168941
GSM914371	0.00163175	0	0.00134426	0.225736	0.0253449	0	0.0477363	0	0.0194316	0	0	0.11395	0.201033	0.0720903	0	0	0	0	0.0037573	0	0	0.287945
GSM914372	0	0.0346221	0.00561313	0.0937314	0.091784	0.0348405	0.0181436	0	0	0	0	0.0954693	0.397731	0	0	0	0	0.00651658	0	0.00558632	0	0.215962
GSM914373	0.0153258	0	0	0.016831	0.0554916	0.044176	0	0	0.0083793	0	0.0145026	0.0181848	0.376518	0.0283347	0	0	0	0.0028155	0	0	0	0.419441
GSM914374	0.0319306	0	0.00863147	0.0403426	0.0916909	0.0960372	0	0	0.0615234	0	0	0.0954749	0.325639	0.00470891	0	0	0	0.000283455	0	0	0	0.243737
GSM914375	0.00877781	0	0	0.162642	0.0938752	0.021953	0.00911465	0	0.0568646	0	0.00378243	0.118554	0.249424	0	0	0	0	0.0013966	0	0	0	0.273615
GSM914376	0.00246796	0.00697654	0	0.0891206	0.0814826	0	0.0231125	0	0.0284439	0	0.0626598	0.039887	0.169998	0.0280079	0	0.00827286	0	0.000837935	0	0.023616	0	0.435116
GSM914377	0	0.00679933	0.00142185	0.0972504	0.0867414	0.0321558	0.00463046	0	0.0212065	0	0.0261171	0.0578058	0.247333	0.0338575	0	0	0	0	0	0.0035412	0	0.381139
GSM914378	0.00216088	0	0	0.0132579	0.150537	0.00983779	0	0	0.043334	0	0.0127645	0.0339214	0.337092	0.0253267	0	0	0	0.00969437	0	0.00124816	0	0.360825
GSM914379	0	0.0108749	0	0.0829814	0.0167235	0.0746001	0.00258008	0	0.0515013	0	0.0321116	0.0903157	0.285474	0.00113356	0	0	0	0.000794503	2.74557e-05	0	0.025806	0.325076
GSM914380	0.00626084	0.00402875	0	0.0555157	0.102673	0.0521685	0	0	0.0371302	0	0.0127814	0.0343721	0.342597	0	0	0	0	0.00170916	0	0	0	0.350764
GSM914381	0.00549878	0.00228919	0	0.0994481	0.208526	0.0871384	0	0	0.0298637	0	0.00867774	0.156733	0.100832	0	0	0	0	0.000546187	0	0	0	0.300448
GSM914382	0.00438959	0.0193292	0	0.0828479	0.11272	0.125185	0	0	0.0153531	0	0.000322292	0.0443316	0.236335	0	0	0	0	0.000724389	0.00846859	0	0	0.349993
GSM914383	0.0167595	0	0	0.1164	0.0830714	0.13162	0	0	0.0306727	0	0.00847046	0.0513915	0.240621	0	0	0	0	0.000820155	0.00402173	0	0	0.316151
GSM914384	0.00682768	0.00969528	0	0.0989334	0.152922	0.105034	0.00830814	0	0.0134713	0	0.0209907	0.0700038	0.21857	0	0	0	0	0.00304405	0.00923607	0	0	0.282964
GSM914385	0.00862445	0	0	0.0459526	0.121411	0	0.000430979	0	0.0321321	0	0.0264401	0.0411473	0.326403	0	0	0	0	0.0114945	0.00987104	0	0	0.376094
GSM914386	0.00390604	0	0	0.0458894	0.0669202	0.0263041	0	0	0.0268611	0	0	0.0407352	0.378547	0	0	0	0	0.00577952	0	0.0397527	0	0.365305
GSM914387	0	0.00598978	0	0.269214	0.0409976	0	0.0538993	0	0.0666142	0	0.0498373	0.129007	0.257059	0.0275539	0	0	0	0	0	0.0116299	0	0.0881988
GSM914388	0	0.0219907	0	0.127339	0.121291	0.0558859	0.018654	0	0.000351497	0	0	0.0524552	0.126538	0.00318908	0	0	0	0.00296189	0.00658354	0	0	0.462759
GSM914389	0	0.00645263	0	0.210708	0.0210096	0	0	0	0.0546967	0	0	0.131504	0.379575	0	0	0	0	0.00295747	0	0.00351417	0	0.189583
GSM914390	0	0.0354118	0	0.0276151	0.108694	0.0388914	0	0	0.0516781	0	0	0.0488223	0.100991	0	0	0	0	0.00816115	0.0374108	0	0	0.542324
GSM914391	0.00294171	0.0113254	0	0.163718	0.105724	0	0	0	0.0808367	0	0	0.0952302	0.201195	0.00686469	0	0	0	0.00275727	0	0.0167736	0	0.312634
GSM914392	0	0.0102787	0	0.114534	0.119369	0.0559398	0.0511037	0	0	0	0.0234478	0.0303349	0.213909	0	0	0	0	0.00119538	0.0023102	0	0	0.377578
GSM914393	0	0.0104717	0	0.161309	0.102917	0.0412797	0	0	0.0719985	0	0.00831504	0.0905279	0.27218	0	0	0	0	0.00113587	0.00455846	0	0	0.235306
GSM914394	0.0488867	0	0.00417623	0.146008	0.039359	0.0800667	0	0	0.0724373	0	0.00775028	0.12446	0.24951	0	0	0	0	0.000292224	0.00182584	0	0	0.225228
GSM914395	0	0.0226663	0	0.136193	0.0624682	0.0470712	0	0	0.0650013	0	0.0230649	0.0802794	0.323484	0	0	0	0	0.000691478	0.00684801	0	0.0128877	0.219344
GSM914396	0.0128478	0	0	0.0788514	0.0673618	0.0652823	0	0	0.0261121	0	0.0172629	0.0935754	0.131256	0	0	0.0296283	0	0.000523443	0	0.0132323	0	0.464067
GSM914397	0.00279413	0.0293317	0	0.194946	0.055505	0.0526052	0.017821	0	0.018537	0	0	0.115216	0.183543	0	0	0.00864754	0	0.00412182	0.0188481	0	0	0.298084
GSM914398	0.0223062	0.000540895	0	0.12774	0.141917	0.0573372	0	0	0.057195	0	0.0579437	0.0723973	0.191273	0	0	0.00258043	0	0	0.00229385	0.00289854	0	0.263577
GSM914399	0	0.0223772	0	0.0584006	0.0661542	0.0424895	0.0172114	0	0.0124129	0	0.0275782	0.056027	0.229774	0.016235	0	0	0	0.00253135	0	0.00469891	0	0.44411
GSM914400	0	0.0234693	0	0.0796368	0.131648	0	0	0	0.0997284	0	0.0280668	0.0654858	0.207844	0	0	0	0	0.0109086	0	0.0108041	0	0.342408
GSM914401	0.112315	0	0	0.111424	0.087851	0.107137	0.000552744	0	0.0560235	0	0.0212201	0.0852129	0.240022	0	0	0	0	0.000724477	0.000439276	0	0	0.177078
GSM914402	0.024632	0.00872689	0	0.174428	0.133882	0.0200579	0.00249021	0	0.0546703	0	0.0198986	0.0692013	0.259249	0.000231886	0	0	0	0.00238317	0.00436751	0	0	0.225781
GSM914403	0	0.0191756	0	0.0845716	0.0932671	0.000194488	0.0107462	0	0.0181821	0	0.0358201	0	0.189195	0.00144499	0	0.0317232	0	0.00857587	0	0	0	0.507103
GSM914404	0.00719542	0.00783725	0	0.139405	0.0783693	0.0398533	0	0	0.0671888	0	0	0.139314	0.224469	0	0	0	0	0.0037226	0	0.0170572	0	0.275588
GSM914405	0.00908727	0.00233961	0	0.1923	0.0457239	0	0	0	0.081713	0	0	0.11052	0.226168	0.0152963	0	0	0	0.0015943	0	0.00391691	0	0.31134
GSM914406	0.0201552	0	0	0.0495967	0.0463689	0.0665905	0	0	0.0518621	0	0.0151719	0.0520766	0.219357	0.0327398	0	0	0	0	0	0.052204	0	0.393878
GSM914407	0.00146652	0.0131114	0	0.101011	0.122738	0.0768266	0.00754929	0	0.0403166	0	0.0892	0.022289	0.242547	0.0061088	0	0	0	0.000139334	0	0.0154994	0	0.261196
GSM914408	0.0113049	0.00244433	0	0.109576	0.0821011	0	0	0	0.054772	0	0.0165279	0.065114	0.263218	0.0180967	0	0	0	0	0	0.0195071	0	0.357339
GSM914409	0	0.0156039	0	0.0469137	0.0724725	0.0852765	0	0	0.088714	0	0.0441049	0.107586	0.186292	0.00909785	0	0	0	0	0	0.0155727	0	0.328366
GSM914410	0.031515	0.00828191	0.000522357	0.152692	0.0629591	0.00198822	0.00325636	0	0.0411059	0	0.0187229	0.0655741	0.282119	0	0	0.00541925	0	0.00260132	0	0	0	0.323243
GSM914411	0	0.0102802	0	0.0253329	0.0689654	0.061282	0	0	0.0367044	0	0.0155563	0.0328855	0.248474	0.0208592	0	0	0	0	0	0.0335393	0	0.446121
GSM914412	0.00641131	0.0142527	0	0.064307	0.038912	0.0010168	0	0	0.0416283	0	0.0151564	0.0386616	0.262894	0.0181376	0	0	0	0.00269497	0	0.0375749	0	0.458352
GSM914413	0.000922296	0.0390012	0	0.180743	0.114254	0	0	0	0.0705413	0	0.0469906	0.0592293	0.117183	0	0	0	0	0.0116067	0.0236106	0	0	0.335919
GSM914414	0.0756682	0	0	0.161937	0.1243	0.0558616	0	0	0.0628754	0	0.0226096	0.0463834	0.164366	0.00129912	0	0	0	0.00242636	0	0.00223929	0	0.280033
GSM914415	0	0.00196114	0	0.106241	0.07384	0.119339	0	0	0.0345487	0	0.061311	0.0179082	0.311332	0.0028525	0	0	0	0.000154121	0	0.00354573	0	0.266967
GSM914416	0	0.060158	0	0.0808482	0.152624	0.0505206	0.00225592	0	0.0770261	0	0.0549606	0.0342712	0.150343	0.00916718	0	0	0	0.0101817	0.028055	0	0	0.289588
GSM914417	0	0.00599384	0.00995923	0.328773	0.0414212	0	0	0	0.0595688	0	0	0.144288	0.245583	0	0	0.0183397	0	0.00135157	0	0.00333027	0	0.141392
GSM914418	0.00365122	0.00670602	0	0.0936387	0.0382818	0.00296773	0	0	0.0320186	0	0	0.0959803	0.27263	0.00669703	0	0	0	0.00301331	0	0.00487562	0	0.439539
GSM914419	0.001167	0.00504903	0	0.0855082	0.00781556	0	0	0	0.0298632	0	0.0084992	0.0410235	0.204355	0.0244108	0	0	0	0.00183551	0	0.0465203	0	0.543952
GSM914420	0.00231908	0.00358882	0	0.0621009	0.046736	0.0199399	0	0	0.0410087	0	0.0287176	0.0387304	0.206248	0.0426575	0	0	0	0.00109424	0	0.0370818	0	0.469777
GSM914421	0	0.0158762	0	0.0837526	0.0947388	0.110622	0	0	0.050111	0	0	0.147359	0.215113	0	0	0	0	0.000342473	0	0.0174031	0	0.264682
GSM914422	0	0.06999	0	0.157186	0.00690133	0	0	0	0.0429755	0	0	0.13252	0.178958	0.0124163	0	0	0	0.00339205	0	0.0151603	0	0.3805
GSM914423	0	0.0175234	0	0.0354077	0.0530552	0.0454554	0	0	0.0362501	0	0.0233325	0.0235031	0.34173	0.0261133	0	0	0	0	0	0.00498598	0	0.392644
GSM914424	0.00580015	0.0113292	0	0.0492262	0.0897193	0.0607311	0	0	0.0435168	0	0.00131589	0.0993705	0.232008	0.019277	0	0	0	0.000220325	0	0.0332134	0	0.354272
GSM914425	0	0.0134134	0.00041162	0.0378315	0.03663	0.0327746	0	0	0.042852	0	0.0159159	0.0435311	0.2006	0.0384843	0	0	0	0.00402655	0	0.0545571	0	0.478972
GSM914426	0	0.0249498	0	0.131427	0.00989611	0	0	0	0.038166	0	0.0327071	0.0288175	0.216	0.051404	0	0	0	0	0	0.041026	0	0.425606
GSM914427	0.0045054	0.0120243	0	0.0632757	0.107364	0.0578955	0	0	0.0360472	0	0.0130217	0.0452919	0.219782	0.00899404	0	0	0	0.000666351	0	0.0191094	0	0.412022
GSM914428	0	0.0133171	0	0.082753	0.0755559	0.0108405	0	0	0.0270178	0	0.0503715	0.0374051	0.284013	0	0	0	0	0.00281343	0	0.0104356	0	0.405477
GSM914429	0	0.0124459	0	0.111676	0.0245808	0	0	0	0.0622033	0	0.0276291	0.05645	0.189923	0.00638804	0	0	0	0.00155905	0	0.0320146	0	0.47513
GSM914430	0.029906	0	0	0.159872	0.12704	0.00960978	0.0293336	0	0.0393558	0	0.0140323	0.110487	0.181033	0.0105577	0	0	0	0.00176821	0.0121176	0	0	0.274888
GSM914431	0.0256448	0	0	0.199525	0	0	0	0	0.071566	0	0.0066317	0.0631622	0.187336	0.0333587	0	0	0	0	0.00266742	0	0	0.410108
GSM914432	0.00173527	0.0282932	0	0.251941	0.106497	0	0	0	0.0912653	0	0.0632064	0.0916766	0.156326	0	0	0.00590266	0	0.00415725	0	0	0	0.199
GSM914433	0	0.0168481	0.00116988	0.189075	0.0248374	0	0	0	0.0540134	0	0.0263641	0.0622453	0.345706	0.0191258	0	0	0	0.0019678	0	0.0325185	0	0.226129
GSM914434	0	0.0104062	0	0.211496	0.106929	0	0	0	0.0484582	0	0	0.197494	0.178249	0	0	0	0	0.00146051	0	0.0015849	0	0.243922
GSM914435	0.0164475	0	0.0103974	0.0601425	0.071677	0.029497	0.000196524	0	0.0295312	0	0.0268337	0.0443722	0.212084	0.0413065	0	0	0	0.00340432	0	0.0204567	0	0.433654
GSM914436	0	0.0107009	0	0.0653631	0.0773013	0.0456132	0	0	0.0315571	0	0.0138666	0.0893738	0.242675	0	0	0	0	0.00283736	0	0.0114354	0	0.409277
GSM914437	0	0.018235	0	0.0704648	0.0942355	0.0195526	0	0	0.0326687	0	0.0150586	0.0526159	0.289288	0.018206	0	0	0	0.00373158	0	0.0235305	0	0.362413
GSM914438	0.0108531	0	0	0.0917038	0.0285323	0	0	0	0.0369076	0	0.00566578	0.0488475	0.293451	0.000227303	0	0.000450157	0	0.00180205	0	0.00115443	0	0.480404
GSM914439	0	0.0156239	0.0068243	0.132709	0.0764762	0.0147913	0	0	0.0666706	0	0.00778996	0.137199	0.16382	0.0147104	0	0	0	0.00238654	0	0.0297169	0	0.331281
GSM914440	0.0326464	0	0	0.259774	0.0710835	0	0	0	0.0588072	0	0	0.0939708	0.158308	0.00180786	0	0	0	0.0020534	0	0.00808844	0	0.313461
GSM914441	0	0.0153558	0	0.0550551	0.0587887	0.0420184	0.00761125	0	0.0351841	0	0.0134013	0.0321128	0.232704	0.0140602	0	0	0	0	0	0.0297155	0	0.463993
GSM914442	0	0.00883341	0.00194142	0.12659	0.0708012	0.0619947	0	0	0.0777478	0	0.0179688	0.0763866	0.215775	0.0209284	0	0	0	0.00373359	0	0.00761998	0	0.309679
GSM914443	0	0.0205064	0	0.0916787	0.0639636	0.0427514	0.0107446	0	0.0192807	0	0.0125329	0.0479375	0.346855	0	0	0	0	0.00462978	0	0.0210877	0	0.318032
GSM914444	0.00721738	0	0	0.110573	0.114861	0.0225332	0	0	0.0669153	0	0.0100828	0.0612317	0.250782	0.0137494	0	0	0	0.0089362	0.00204285	0	0	0.331076
GSM914445	0.00500929	0	0	0.122697	0.0334775	0.0339667	0.0180836	0	0.0271796	0	0.00603311	0.0827387	0.205307	0.0151264	0	0	0	0	0.000289776	0	0	0.450092
GSM914446	0	0.0286637	0.0160121	0.14028	0.112785	0	0	0	0.073201	0	0.0240372	0.0701232	0.144169	0.0138083	0	0	0	0.00939456	0	0.0188369	0	0.348689
GSM914447	0	0.00550778	0	0.0721105	0.101173	0.126671	0.00708961	0	0.0317653	0	0.0266361	0.0772914	0.304565	0	0	0	0	0.00332432	0.0072367	0	0	0.236629
GSM914448	0.0220377	0	0	0.0294273	0.103422	0.0145933	0	0	0.0284626	0	0	0.0530661	0.220351	0	0	0.0126895	0	0.00966361	0	0.0110745	0	0.495212
GSM914449	0.038697	0	0	0.106985	0.0295279	0.0522083	0	0	0.0512924	0	0	0.0700235	0.108428	0.0524525	0	0.0292707	0	0.00685242	0	0.00180118	0	0.452461
GSM914450	0.0258763	0	0	0.283754	0	0	0	0	0.0941498	0	0.0918594	0.10444	0.170551	0	0	0	0	0	0	0.000827374	0.0186395	0.209902
GSM914451	0.0520535	0	0.00599839	0.352421	0.0046718	0	0.0304555	0	0.056678	0	0.00283702	0.0715393	0.220844	0	0	0	0	0.00134796	0.000940564	0	0.00474527	0.195468
GSM914452	0	0.00728656	0	0.32907	0.0188904	0	0.0413647	0	0.0847979	0	0.0373331	0.0913938	0.253142	0.00636195	0	0	0	0	0.00663472	0	0	0.123726
GSM914453	0	0.00519213	0.00297792	0.295116	0.0147487	0	0.0341279	0	0.0468924	0	0	0.123006	0.0976999	0.010085	0	0.018228	0	0.00145085	0.0214978	0	0	0.328978
GSM914454	0	0.0100875	0	0.218158	0.0693086	0	0	0	0.0876721	0	0.0308516	0.109441	0.215231	0.0225675	0	0	0	0	0	0.0197239	0	0.216959
GSM914455	0.0587407	0	0	0.251691	0.0368249	0	0.0239103	0	0.0671819	0	0.00661621	0.0847339	0.176954	0	0	0	0	0.000703752	0.00231482	0	0	0.290329
GSM914456	0	0.0735963	0	0.124691	0.0937321	0	0	0	0.0549428	0	0	0.0982437	0.293958	0.102317	0	0	0	0	0.0334816	0	0	0.125038
GSM914457	0	0.0391067	0	0.329057	0.0139886	0	0.00435509	0	0.0595377	0	0.00825705	0.138526	0.238068	0.01331	0	0.00394968	0	0.00118679	0.0101497	0	0	0.140508
GSM914458	0	0.0623529	0	0.163115	0.0287293	0	0	0	0.0686572	0	0.00346101	0.0980188	0.301607	0.00547783	0	0	0	0	0	0.0262594	0	0.242321
GSM914459	0.0154687	0	0	0.194185	0.0122978	0	0	0	0.0547658	0	0	0.0994302	0.376182	0.0190432	0	0	0	0	0	0.00887483	0	0.219753
GSM914460	0	0.00737396	0	0.183201	0.0497052	0	0	0	0.0380698	0	0.00579946	0.057983	0.287455	0	0	0	0	0.00164261	0	0.0132491	0	0.35552
GSM914461	0	0.012768	0.00600428	0.26335	0	0	0.0324724	0	0.020321	0	0	0.106581	0.31582	0.0148507	0	0.00674837	0	0	0.00532903	0	0	0.215755
GSM914462	0	0.0322561	0.0394055	0.414148	0	0	0.0070073	0	0.0680268	0	0	0.185656	0.148966	0.00404637	0	0	0	0	0.00483643	0	0.00883703	0.0868137
GSM914463	0	0.0466931	0.0356715	0.406254	0	0	0	0	0.120515	0	0	0.136542	0.185637	0.00442937	0	0	0	0	0.00701008	0.00113136	0	0.0561163
GSM914464	0	0.00403167	0.00834412	0.310389	0.00608702	0	0	0	0.0168943	0	0	0.209252	0.143032	0	0	0.00998073	0	0.00125153	0	0	0	0.290738
GSM914465	0	0.037119	0	0.184942	0.0689203	0	0.0494131	0	0.0207808	0	0.000643811	0.0974381	0.226636	0	0	0	0	0.00486555	0.0007647	0	0	0.308477
GSM914466	0	0.00974891	0	0.142185	0.077508	0	0	0	0.0235889	0	0	0.0708816	0.350395	0	0	0	0	0.00373754	0.000680774	0	0	0.321275
GSM914467	0	0.00594545	0	0.221506	0.0446692	0	0	0	0.0848072	0	0.0623669	0.0943089	0.146096	0.026702	0	0	0	0.00226604	0	0.00754238	0	0.30379
GSM914468	0	0.0650518	0.00259317	0.214271	0.0518508	0	0	0	0.0718685	0	0.00838927	0.106218	0.22574	0.00960226	0	0	0	0.00200899	0.0113474	0	0	0.23106
GSM914469	0	0.036448	0	0.230181	0.0170323	0	0.0370201	0	0.0937176	0	0.0650726	0.0865932	0.286643	0.0259193	0	0	0	0	0.00642304	0.000782671	0	0.114166
GSM914470	0.0436753	0	0	0.232271	0	0	0.0496946	0	0.0602637	0	0.00548794	0.0556765	0.220893	0.0377591	0	0	0	5.10895e-05	0	0.00407611	0	0.290152
GSM914471	0	0.00775125	0.0211302	0.0761619	0.0299043	0	0.0256855	0	0.0166173	0	0	0.0771326	0.24605	0.0253776	0	0	0	0.00309005	0.00474178	0	0	0.466358
GSM914472	0	0.0618148	0	0.190484	0.118377	0	0	0	0.101658	0	0.0148713	0.0688429	0.251946	0.00406424	0.00116591	0	0	0	0.00807019	0	0.0359908	0.142714
GSM914473	0	0.049705	0	0.212136	0.096622	0	0	0	0.106323	0	0.0499786	0.101995	0.258145	0.0102424	0	0	0	0.0100748	0.0052626	0.00598806	0	0.0935283
GSM914474	0	0.0755297	0.0253411	0.106112	0.130488	0.0318245	0	0	0.0332332	0	0.00353302	0.0783423	0.302173	0	0	0	0	0.00403015	0	0.000359701	0	0.209034
GSM914475	0	0	0.00297836	0.205286	0.0382134	0	0	0	0.0356252	0	0	0.123671	0.231485	0.0222375	0	0	0	0	0	0.00455549	0	0.335948
GSM914476	0.0248088	0	0	0.196339	0.0235136	0	0.0192043	0	0.138362	0	0	0.0838848	0.283716	0.150262	0	0	0	0	0.0215546	0	0.01897	0.0393847
GSM914477	0.0145849	0	0	0	0.0923029	0	0	0	0.0263347	0.0182409	0	0.0380898	0.301959	0.038114	0	0	0	0.00869254	0.0305905	0	0	0.431091
GSM914478	0	0.0103864	0	0.109022	0.0607164	0.044019	0	0	0.0313782	0	0.0094857	0.055957	0.398922	0	0	0	0	0.00111833	0	0.00709936	0	0.271896
GSM914479	0	0.0200383	0.00250173	0.306106	0.0830155	0	0.0109995	0	0.0311992	0	0	0.137442	0.218852	0	0	0.00329322	0	0.00301463	0.0020711	0	0	0.181466
GSM914480	0.0268822	0	0	0.222837	0.0404947	0	0	0	0.0441632	0	0	0.086024	0.293161	0	0	0	0	0.00345805	0	0.00714709	0	0.275832
GSM914481	0	0.0148529	0.00156884	0.162164	0.0467194	0	0.000662316	0	0.0392674	0	0.0191236	0.0596044	0.321874	0.0244681	0	0	0	0	0.00633801	0	0	0.303357
GSM914482	0	0.014531	0.00906455	0.129909	0.0769408	0	0.0306404	0	0.0286592	0	0.0633496	0.0426855	0.235047	0.0292035	0	0	0	0	0.0013299	0	0	0.338639
GSM914483	0	0.0105075	0.00536107	0.189985	0.0287031	0	0	0	0.0579247	0	0	0.120433	0.185928	0.0103704	0	0	0	0	0	0.0128914	0	0.377896
GSM914484	0	0.0465078	0	0.0778185	0.133933	0	0	0	0.0328472	0	0	0.0589922	0.0647194	0.0110272	0	0.0299128	0	0.0103393	0	0.0216187	0	0.512284
GSM914485	0.009276	0.000356976	0	0.0489673	0.0593246	0	0	0	0.0444861	0	0	0.0600498	0.15905	0.044557	0	0	0	0.00871472	0	0.0244797	0	0.540738
GSM914486	0.012981	0	0	0.0286751	0.058592	0	0	0	0.0485409	0.015033	0	0.0352321	0.300895	0.0477437	0	0	0	0	0.011167	0	0	0.44114
GSM914487	0.0155205	0	0	0.00818608	0.0958071	0	0	0	0.033082	0.0143129	0	0.0290917	0.368495	0.034236	0	0.00637161	0	0	0.0274414	0	0	0.367455
GSM914488	0	0.00689485	0.00307033	0.196314	0.00688897	0	0.0243208	0	0.033571	0	0	0.0878494	0.325322	0.0383182	0	0	0	0	0	0.00610378	0	0.271347
GSM914489	0.0132242	0.00924017	0	0.0668834	0.163637	0	0	0	0.0611664	0	0.0162676	0.0417653	0.254026	0.00399598	0	0	0	0.0110606	0.0010337	0	0	0.357699
GSM914490	0.0165048	0.00762268	0	0.17872	0.0488313	0.00524457	0.0191276	0	0.0330384	0	0.00668241	0.0615601	0.333364	0	0	0.0198413	0	0.00337693	0.01071	0	0	0.255375
GSM914491	0	0.0804673	0.00131136	0.195114	0.00911927	0	0.0494864	0	0.00254463	0	0	0.10042	0.311777	0.0185209	0	0	0	0.00139173	0	0	0	0.229848
GSM914492	0	0.0508154	0.00900566	0.180525	0.0646177	0	0.0419728	0	0.0322984	0	0	0.116634	0.229639	0	0	0	0	0.00222908	0.000373686	0	0.0194622	0.252427
GSM914493	0.00237816	0.0168662	0	0.207173	0.000207181	0.0114362	0.0667782	0	0.026718	0	0	0.12642	0.412891	0	0.00140313	0.0172017	0	0.00252331	0	0	0.0111803	0.0968235
GSM914494	0.00957295	0	0	0.156741	0.0076317	0.0177919	0.00250071	0	0.0530496	0	0	0.085094	0.240516	0.0259304	0	0	0	0.000966739	0.00525842	0	0	0.394947
GSM914495	0.0159316	0	0	0.162561	0.0173359	0	0.0607377	0	0.0188567	0	0	0.123981	0.219679	0.0197455	0	0	0	0	0.00545839	0	0	0.355714
GSM914496	0.0215875	0	0	0.0335149	0.0178889	0	0	0	0.0419799	0	0	0.064958	0.178179	0.0282783	0	0	0	0.00211586	0	0.0267035	0	0.584794
GSM914497	0	0.0110984	0	0.228497	0.00705789	0	0.0220229	0	0.0624691	0	0	0.0636137	0.248445	0.0163622	0	0	0	0.00211051	0	0.00870833	0	0.329615
GSM914498	0	0.0426635	0	0.2077	0.0216718	0	0	0	0.0805747	0	0.0101634	0.0965462	0.274578	0.0308014	0	0	0	0	0.00911962	0.000291382	0	0.22589
GSM914499	0	0.0242653	0	0.103773	0.0353653	0	0.0415503	0	0.013231	0	0.0371801	0.0375675	0.31553	0.00430365	0	0	0	0.00237993	0	0.00834656	0	0.376507
GSM914500	0	0.0191248	0.0121015	0.284747	0.0235334	0	0.0337128	0	0.0666567	0	0.011139	0.125571	0.228333	0	0	0	0	0.00247205	0	0.00594077	0.00159363	0.185074
GSM914501	0	0.0135499	0	0.203198	0.0299306	0	0	0	0.0850675	0	0	0.109785	0.225269	0.0225726	0	0	0	0.0115716	0	0.00648331	0	0.292572
GSM914502	0	0.0138751	0	0.187803	0	0	0	0	0.0458946	0	0	0.0772499	0.219087	0.00936986	0	0	0	0.000129011	0	0.00573817	0	0.440853
GSM914503	0	0.00901705	0	0.147456	0.0355301	0	0.0245643	0	0.0399027	0	0.0344413	0.091478	0.185377	0	0	0	0	0.00443127	0	0.00453044	0	0.423271
GSM914504	0.000868526	0.0417308	0.0186354	0.214225	0	0	0.0452838	0	0.00199599	0	0	0.091329	0.10121	0	0	0.0165562	0	0.0156377	0.0299172	0	0	0.42261
GSM914505	0	0.0170227	0.00204433	0.124987	0.000925577	0	0	0	0.048458	0	0	0.0743937	0.153861	0.0552005	0	0	0	0	0	0.00073446	0	0.522373
GSM914506	0.0225283	0.0155759	0	0.0523443	0.00083011	0	0	0	0.089083	0	0	0.0778065	0.0117818	0.092706	0	0.00461251	0	0.00738397	0	0.0539646	0	0.571383
GSM914507	0	0.0062114	0	0.093759	0.0054294	0	0.0128429	0	0.0335217	0	0	0.0442823	0.288472	0.0537355	0	0	0	0.000548016	0.0154252	0	0	0.445772
GSM914508	0	0.00923148	0	0.0940637	0.0312254	0	0	0	0.0553809	0	0	0.0445488	0.15483	0.0331274	0	0	0	0.00440472	0	0.0515102	0	0.521678
GSM914509	0	0.00897226	0	0.236854	0.0561445	0	0	0	0.0555331	0	0	0.0990815	0.251899	0	0	0	0	0.00810872	0.00135929	0	0	0.282048
GSM914510	0.00390887	0.0256131	0.0128027	0.0938407	0.0088284	0	0.01343	0	0.0413578	0	0.0249053	0.0402666	0.187397	0.0394414	0	0	0	0	0	0.0234378	0	0.48477
GSM914511	0.000466269	0.00695377	0	0.0636704	0.0755671	0.01896	0	0	0.0897121	0	0.0387933	0.0442499	0.220517	0.0481345	0	0	0	0	0	0.012646	0.0130125	0.367317
GSM914512	0	0.0755363	0.0693935	0.198644	0.0382131	0	0.0280429	0	0.0563628	0	0.0375291	0.0644834	0.0751847	0.0263612	0	0.0148284	0	0.00190126	0	0.00948911	0	0.30403
GSM914513	0	0.0120611	0	0.158813	0.0423152	0	0	0	0.0325899	0	0	0.0662846	0.248841	0.0801018	0	0	0	0	0	0.00950521	0	0.349488
GSM914514	0.0232835	0	0	0.0628276	0.0223964	0	0.0110286	0	0.0389622	0	0	0.0712969	0.117628	0.0695437	0	0	0	0	0.00196528	0	0	0.581068
GSM914515	0	0.0414671	0	0.180765	0.00390849	0	0	0	0.0819865	0	0.0113611	0.0959629	0.281345	0.0265311	0	0	0	0	0	0.0216582	0	0.255015
GSM914516	0	0.0704506	0	0.268609	0.00684726	0	0	0	0.0939575	0	0	0.10857	0.185507	0.024715	0	0	0	0.00344796	0.00145238	0	0	0.236444
GSM914517	0.00162836	0.0191697	0	0.149459	0	0	0.0147599	0.0115542	0.0224222	0	0	0.0915833	0.143731	0.0400669	0	0	0	0	0	0.0301178	0	0.475508
GSM914518	0	0.0293578	0	0.229053	0.06292	0	0	0	0.0516695	0	0.00304125	0.0753275	0.187635	0	0	0	0	0.00731736	0	0.0124642	0	0.341214
GSM914519	0	0.0335765	0	0.156665	0.0571786	0	0	0	0.0610502	0	0.0218506	0.0637646	0.213242	0	0	0	0	0.00403641	0	0.0292436	0	0.359393
GSM914520	0	0.0154371	0	0.0922701	0.039661	0	0.0168689	0	0.0280757	0	0.0338797	0.0563509	0.241498	0.0544567	0	0	0	0.00352587	0	0.00950187	0	0.408474
GSM914521	0.00765889	0.0304391	0	0.315714	0.0480728	0	0	0	0.103524	0	0.00709978	0.133726	0.20133	0.00535692	0	0	0	0.00124361	0	0.00192897	0	0.143906
GSM914522	0.0435243	0	0	0.0313586	0.035539	0	0	0	0.0728203	0	0	0.0514102	0.190631	0.0599128	0	0	0	0	0.0184205	0	0	0.496383
GSM914523	0	0.0060628	0	0.0309323	0.083316	0	0	0	0.0542565	0	0	0.0427798	0.185782	0.0463428	0	0	0	0.00426836	0	0.0131263	0	0.533133
GSM914524	0	0.0172413	0	0.167527	0.0153473	0	0	0	0.064797	0	0	0.0902652	0.198495	0.0981547	0	0	0	0	0.0101755	0	0	0.337997
GSM914525	0.00655888	0.0140764	0	0.210377	0.0136807	0	0	0	0.0627639	0	0	0.141032	0.21765	0.0178911	0	0	0	0	0	0.00565524	0	0.310315
GSM914526	0	0.0151104	0	0.233638	0	0	0	0	0.0506082	0	0	0.0918281	0.145662	0.0545566	0	0	0	0	0	0.0179649	0	0.390631
GSM914527	0	0.00809755	0	0.365107	0.00192099	0	0.00588503	0	0.0757988	0	0.0723826	0.15935	0.143605	2.55724e-05	0	0	0	0	0	0	0	0.167828
GSM914528	0.00083484	0.0112273	0	0.19157	0.0577418	0	0	0	0.0607148	0	0.000907325	0.0693302	0.181844	0	0	0	0	0.00724904	0	0.0153449	0	0.403236
GSM914529	0.0597121	0	0.000610018	0.0343614	0.0125938	0	0	0	0.0404085	0	0.0148732	0.0210571	0.235736	0.0459039	0	0	0	0.0112456	0	0.051797	0	0.471702
GSM914530	0	0.0401003	0	0.344394	0.0133352	0	0	0	0.115833	0	0	0.191499	0.178622	0.00310563	0	0	0	0.00885728	0	0.0116493	0	0.0926044
GSM914531	0.0386967	0	0	0.247392	0.0371802	0	0.017165	0	0.0769625	0	0.0489788	0.170467	0.150275	0.0263856	0	0	0	0.0011428	0	0.00177367	0	0.18358
GSM914532	0.0613217	0	0	0.0863201	0.0828607	0.0320978	0	0	0.0361766	0	0.043898	0.0214317	0.304013	0.00773046	0	0	0	0.00171079	0	0.00985256	0	0.312587
GSM914533	0.00742896	0.0186356	0.0270785	0.346301	0	0	0	0	0.0419689	0	0	0.192886	0.172924	0	0	0	0	0.00195852	0	0.0066141	0	0.184204
GSM914534	0	0.0754776	0	0.241846	0.0302485	0	0	0	0.115228	0	0.0427048	0.0790455	0.239236	0.013231	0	0	0	0.00618867	0	0.0114783	0	0.145315
GSM914535	0	0.0122295	0	0.30877	0.000928682	0	0	0	0.0574298	0	0	0.0880075	0.158946	0.0221712	0	0	0	0	0	0.0315771	0	0.319941
GSM914536	0	0.0316262	0	0.235489	0.0100076	0	0	0	0.0851167	0	0.00797837	0.11434	0.261921	0	0	0	0	0.00524319	0	0.0189283	0	0.22935
GSM914537	0.00432508	0.0459776	0.011991	0.253456	0.0149957	0	0	0	0.151867	0	0.0133539	0.146928	0.166827	0.0238787	0	0	0	0.0114134	0	0	0	0.154987
GSM914538	0	0.0748656	0	0.320502	0	0	0	0	0.14507	0	0.00798601	0.114462	0.220591	0.00957174	0	0	0	0.000940311	0	0.0114255	0	0.0945852
GSM914539	0.00208109	0.0429634	0.0188509	0.185507	0.0915503	0.0671966	0	0	0.0945979	0	0.0392407	0.102628	0.0895729	0	0	0	0	0.00985531	0.0144488	0	0	0.241508
GSM914540	0	0.0406604	0	0.289581	0.0193683	0	0	0	0.0449787	0	0	0.154336	0.220878	0	0	0.00200496	0	0.00236655	0	0	0	0.225826
GSM914541	0.0370888	0	0.0033231	0.234535	0	0	0	0	0.106	0	0.0144732	0.16307	0.162527	0.034303	0	0	0	0.003048	0	0.00627511	0	0.235357
GSM914542	0.017524	0.0669202	0	0.249762	0.053624	0	0	0	0.139812	0	0.0481643	0.083236	0.236844	0.0155229	0	0	0	0.0108886	0	0	0	0.0777021
GSM914543	0.00068422	0.0303689	0.0292128	0.322473	0	0	0.00997834	0	0.0651396	0	0	0.179823	0.132438	0	0	0.0024261	0	0.00435008	0.0022535	0	0	0.220852
GSM914544	0	0.0458806	0.028154	0.411351	0	0	0	0	0.0972699	0	0	0.173025	0.1062	0	0	0	0	0.00565953	0	0.0129676	0	0.119492
GSM914545	0.0418769	0	0	0.111261	0	0	0	0	0.106679	0	0	0.0803405	0.0896208	0.0451354	0	0	0	0	0	0.0244509	0	0.500635
GSM914546	0.0348106	0	0	0.253656	0.0633939	0	0	0	0.114216	0	0.0326746	0.115093	0.100643	0.0103449	0	0	0	0	0	0.00928407	0	0.265883
GSM914547	0	0.0464478	0.00563396	0.33333	0.0187629	0	0	0	0.132505	0	0.0345274	0.0955218	0.216726	0	0	0	0	0.0115241	0.00079423	0.010807	0	0.0934197
GSM1249177	0	0.0152205	0	0.118309	0.00933448	0	0	0	0.0303032	0	0	0.044091	0.290503	0.0338299	0	0	0	0.00162241	0	0.0144952	0	0.442291
GSM1249178	0	0.0207237	0	0.140025	0.0505906	0	0	0	0.0654238	0	0.00547617	0.0587872	0.251138	0.0236438	0	0	0	0.0019834	0	0.0355532	0	0.346656
GSM1249179	0	0.0141627	0	0.163396	0.0358319	0	0.0134463	0	0.0293053	0	0.0441552	0.0849373	0.170564	0.0446183	0	0	0	0	0	0	0	0.399583
GSM1249180	0	0.00682394	0	0.0786145	0.0310716	0	0	0	0.0283547	0	0	0.0384035	0.235639	0.0388009	0	0	0	0.00119637	0	0.0393149	0	0.501781
GSM1249181	0	0.00491912	0	0.101942	0.00169647	0.000131021	0.0157108	0	0.0143315	0	0.0145243	0.0271951	0.415388	0.00600749	0	0	0	0	0.00216885	0	0	0.395985
GSM1249182	0	0	0	0.0820092	0.0159553	0	0	0	0.033028	0	0	0.0571999	0.0787854	0.0544796	0	0.0331674	0	0	0	0.0271886	0	0.618187
GSM1249183	0	0.0233748	0	0.151476	0.057733	0	0	0	0.0545635	0	0.0096459	0.0633101	0.249713	0.0189625	0	0	0	0.00193639	0	0.0163491	0	0.352936
GSM1249184	0.0137084	0	0	0.0166869	0.0605426	0	0	0	0.0592432	0.00155432	0	0.0219778	0.205974	0.036836	0	0.000279156	0	0	0	0.0254046	0	0.557794
GSM1249185	0	0.00638168	0	0.249193	0.0443692	0	0.0355655	0	0.0344712	0	0	0.124883	0.237457	0	0	0.000846284	0	0.00603868	0	0	0	0.260794
GSM1249186	0.00798809	0.000368104	0	0.0179622	0.0685846	0	0	0	0.0610939	0	0	0.0362997	0.269694	0.0764824	0	0	0	0	0	0.0395262	0	0.422001
GSM1249216	0	0.0261276	0.0445987	0.104247	0.0535672	0.0205666	0.000192777	0	0.0504988	0	0.00387108	0.0585205	0.246652	0	0	0	0	0.00118878	0	0.00316176	0	0.386807
GSM1249217	0.0110641	0.00461513	0	0.123811	0.0258823	0	0	0	0.0486594	0	0	0.0723028	0.291393	0.00546889	0	0	0	0.00347136	0	0.0126745	0	0.400658
GSM1249218	0	0.00681058	0	0.106454	0.0601068	0.016468	0	0	0.0486885	0	0.0163252	0.0347329	0.324316	0.0204398	0	0	0	0.00207419	0	0.0139131	0	0.349671
GSM1249219	0	0.00207258	0	0.00481454	0.036764	0.0329804	0	0	0.0261254	0	0.00845171	0.0194303	0.242945	0.0252073	0	0	0	0.00179727	0	0.0359748	0	0.563436
GSM1249220	0	0.0122272	0	0.00836932	0.076144	0.0420596	0	0	0.0208324	0	0.0154786	0.0252064	0.221237	0.0229183	0	0	0	0.000121379	0	0.0259681	0	0.529438
GSM1249221	0	0.00440399	0	0.120448	0.0887756	0	0	0	0.0246615	0	0.015534	0.0224428	0.256965	0	0	0.0222292	0	0.00197355	0	0.00357503	0	0.438991
GSM1249222	0	0.00980804	0	0.083606	0.0868135	0	0	0	0.0295952	0	0.0229204	0.0205059	0.251284	0.0541124	0	0	0	0	0	0.00376749	0	0.437587
GSM1249223	0	0.00772739	0	0.09245	0.0736824	0.0311501	0	0	0.0342476	0	0.0084283	0.0359208	0.313948	0.0235221	0	0	0	0	0	0.0127768	0	0.366146
GSM1249224	0.0077652	0.000466145	0.00111577	0.131608	0.0829945	0	0	0	0.0367405	0	0.0292336	0.0895666	0.27879	0.0014102	0	0	0	0.010934	0	0.00253038	0	0.326845
GSM1249225	0.0470533	0.0029695	0	0.0488574	0.066139	0.0576298	0.00916873	0	0.00629428	0	0	0.0444443	0.0554038	0.0239028	0	0.011956	0	0	0	0.00342152	0	0.62276
GSM1249226	0	0.0275118	0	0.0181127	0.0401111	0.0114077	0	0	0.0361498	0	0.00875083	0.0469399	0.285932	0.0182867	0	0	0	0.00233805	0	0.0443703	0	0.460089
GSM1249227	0	0.00956012	0	0.0222957	0.0289693	0	0	0	0.0459879	0	0	0.0457735	0.188882	0.0288431	0	0	0	0.00175319	0	0.0498405	0	0.578095
GSM1249228	0.000922081	0.000978341	0	0.0805122	0.100508	0.0171329	0	0	0.0286528	0	0.0256267	0.0346515	0.309531	0.0301324	0	0	0	0	0	0.00859829	0	0.362754
GSM1249229	0.0301749	0.0173349	0.00968836	0.23651	0.056605	0.00803349	0	0	0.0810583	0	0.027283	0.0879377	0.223161	0	0	0	0	0.000854577	0	0	0	0.221358
GSM1249230	0.0401331	0	0	0.100537	0.048221	0.0073838	0	0	0.0502504	0	0	0.0478093	0.284677	0	0	0	0	0.00191414	0	0.0316313	0	0.387443
GSM1249231	0.000368568	0.0029761	0	0.112344	0.0989372	0	0.0195845	0	0.0184685	0	0.0132375	0.0843438	0.247053	0	0	0	0	0.00755131	0	0.0111167	0	0.384019
GSM1249232	0.0326776	0.0161933	0	0.0833463	0.0700091	0.0631625	0.00841724	0	0.0497593	0	0.0233154	0.0528719	0.288188	0	0	0	0	0.00172489	0	0	0	0.310335
GSM1249233	0.0123757	0.0255793	0.00892192	0.319383	0.0370529	0	0.0267261	0	0.0762359	0	0.00284335	0.134012	0.186818	0	0	0	0	0.00454212	0	0.0105738	0	0.154936
GSM1249234	0.0179144	0.00849476	0.00220223	0.199586	0.149174	0	0.0460925	0	0.029582	0	0.0267507	0.134568	0.146101	0	0	0	0	0.0020651	0	0	0	0.237468
GSM1249235	0.00380529	0.0026559	0	0.173018	0.0578354	0	0	0	0.0525428	0	0.0104761	0.136427	0.161303	0.00328458	0	0.00374675	0	0.00289368	0	0.00313452	0	0.388876
GSM1249236	0.0594262	0.00719873	0.00377597	0.178144	0.0489924	0.0864299	0	0	0.0702857	0	0.00110035	0.124428	0.209359	0	0	0	0	0.000401777	0	0.00494017	0	0.205518
GSM1249237	0.00140975	0.0148223	0	0.100751	0.0750324	0.0883796	0.00640038	0	0.0389929	0	0.00934889	0.0615115	0.224988	0	0	0	0	0.00153089	0	0.00562903	0	0.371204
GSM1249238	0.00599902	0.00782211	0	0.134203	0.0404825	0.104914	0.0100426	0	0	0	0	0.134724	0.348142	0	0	0	0	0.000735169	0.00908636	0	0.0480094	0.155839
GSM1249239	0	0.0632743	0	0.0772155	0.133057	0.0533888	0	0	0.0919338	0	0.0404029	0.0516396	0.26027	0	0	0	0	0.00958284	0	0	0	0.219235
GSM1249240	0	0.0570869	0	0.0676097	0.140073	0.00807379	0	0	0.0773665	0	0.00817905	0.0594364	0.201319	0.0176694	0	0	0	0.00904797	0	0.0158591	0	0.338279
GSM1249281	0	0.00954654	0	0.0196037	0.0485212	0	0.00995092	0	0.0276225	0	0.0268351	0.0390005	0.321442	0.0704973	0	0	0	0	0.0182785	0	0	0.408702
GSM1249282	0	0.0226984	0.0175908	0.342601	0	0	0.0377955	0	0.0605326	0	0.0300754	0.164762	0.121434	0.022629	0	0	0	0	0	0.00309977	0	0.176781
GSM1249283	0.00405076	0.0194722	0	0.1599	0.12245	0	0	0	0.0675708	0	0.033524	0.0743418	0.188892	0.000382033	0	0	0	0	0	0.0162764	0	0.31314
GSM1249284	0.0441719	0.00781021	0	0.331929	0.0495196	0	0	0	0.0917624	0	0	0.139396	0.174999	0	0	0	0	0.00331327	0	0.00501744	0	0.152082
GSM1249285	0	0.0324599	0.00930348	0.366878	0.0416445	0	0	0	0.0615241	0	0.0314721	0.14292	0.1398	0.00457149	0	0.0227722	0	0.00264127	0	0	0	0.144013
GSM1249286	0.0179487	0.0304751	0	0.275989	0.0534578	0	0	0	0.0989419	0	0.0029244	0.112386	0.181953	0	0	0	0	0	0	0.0168956	0.0410841	0.167945
GSM1249287	0	0.0189185	0	0.288512	0.0619856	0	0	0	0.0554628	0	0.0533235	0.107484	0.136622	0.0037043	0	0.00877679	0	0.00191765	0	0	0	0.263293
GSM1249288	0	0.0225304	0	0.233625	0	0	0	0	0.0616397	0	0.0157225	0.0800106	0.183376	0	0	0.0171591	0	0.00235619	0.000441847	0	0	0.383138
GSM1249289	0.000434789	0.00728033	0	0.124238	0.0765821	0	0.00852979	0	0.0674865	0	0.0562362	0.0480405	0.382905	0	0	0	0	0.00563371	0	0	0	0.222633
GSM1249290	0.0050358	0.0422515	0.0132791	0.283814	0.145207	0.00558599	0.0306015	0	0.0560888	0	0.0290844	0.106176	0.157685	0	0	0	0	0.00405232	0.00176378	0	0	0.119375
GSM1249291	0	0.00326221	0.0020566	0.324864	0	0	0	0	0.0669969	0	0.029385	0.102828	0.176514	0.0290423	0	0	0	0	0.0077886	0	0	0.257262
GSM1249292	0.0465407	0	0.000567422	0.0865993	0.0287738	0.0427956	0.00371059	0	0.0583365	0	0.00585898	0.0590007	0.358117	0.0294806	0	0	0	0.00217307	0.00741212	0	0	0.270633
GSM1249293	0.0219213	0.0162045	0	0.135394	0.136465	0.0314664	0	0	0.125342	0	0.0319647	0.0939855	0.155105	0.00973263	0	0.021636	0	0.00815231	0.0012361	0	0	0.211394
GSM1249294	0.0528917	0.00501587	0	0.163443	0.179919	0.0845034	0	0	0.129794	0	0.0196944	0.101039	0.180535	0.00611137	0	0	0	0.00799263	0	0	0.00474885	0.0643123
GSM1249295	0	0.0385105	0	0.0875927	0.0978385	0	0	0	0.0596306	0	0.1073	0.0180578	0.284609	0.00553516	0	0	0	0.00229839	0.00134475	0	0	0.297283
GSM1249296	0	0.0583853	0	0.190748	0.0786123	0.0353735	0	0	0.0798936	0	0	0.0818522	0.170787	0	0	0	0	0.0121317	0	0	0.0201237	0.272092
GSM1249297	0	0.0103522	0	0.163306	0.0582861	0	0	0	0.0495466	0	0.0927442	0.0472195	0.254556	0.00690083	0	0	0	0	0.00776021	0	0	0.309328
GSM1249298	0	0.024533	0.00651795	0.303404	0.0242655	0	0	0	0.0520614	0	0	0.119571	0.163452	0.0561817	0	0	0	0	0.00648793	0	0	0.243525
GSM1249299	0	0.0209084	0	0.292924	0	0	0.0109751	0	0.0918395	0	0.0464338	0.0924013	0.227616	0.0231125	0	0	0	2.43298e-05	0.00718922	0	0	0.186576
GSM1249300	0	0.00662089	0	0.330403	0.0447671	0	0.0344492	0	0.03333	0	0.00295486	0.124498	0.187777	0	0	0	0	0.00327017	0	0.000528277	0.00669821	0.224704
GSM1249301	0.0110722	0	0	0.0767194	0.0561503	0	0.0153424	0	0.0301097	0	0	0.0870366	0.314747	0.0174405	0	0	0	0.00507142	0	0	0	0.386311
GSM1249302	0	0.0246898	0.0110033	0.305409	0	0	0	0	0.0743098	0	0.000471672	0.126143	0.200172	0.0253524	0	0	0	0	0.00194099	0	0	0.230508
GSM1249303	0.0189729	0.0621282	0	0.1432	0.106852	0.035155	0	0	0.104976	0	0.0687936	0.0514639	0.275802	0.00599548	0	0	0	0.00810017	0	0.00637114	0	0.11219
GSM1249304	0.0231449	0.014508	0	0.217519	0.0386004	0	0	0	0.102432	0	0.00591842	0.160842	0.285543	0	0	0.00517149	0	0.000207558	0.00867173	0	0	0.137442
GSM1249305	0	0.0110213	0.0141693	0.246068	0.0298552	0	0.0154725	0	0.0448883	0	0	0.0970715	0.245471	0.0503276	0	0.00112533	0	0	0.00334129	0	0	0.241189
GSM1249306	0	0	0	0.116637	0.0666513	0	0.00630513	0	0.0117643	0	0.0252473	0.0505252	0.114475	0.0205093	0	0.0735909	0	0.00984185	0	0.0230233	0	0.48143
GSM1249307	0.0178039	0.00828228	0	0.122902	0.130104	0.00533715	0.0301422	0	0.0211272	0	0.02152	0.0761046	0.211014	0	0	0	0	0.00949034	0	0.0131366	0	0.333036
GSM1249308	0	0.0607891	0	0.161879	0.0946846	0	0.0107319	0	0.105062	0	0.0525878	0.0801576	0.189112	0	0	0	0	0.0098703	0	0.00365767	0	0.231469
GSM1249309	0.0150591	0.00736172	0.0170347	0.0910349	0.0584426	0.0906432	0.00449605	0	0.0624112	0	0.0238843	0.0954892	0.200906	0.0326707	0	0	0	0	0.0059888	0	0	0.294577
GSM1249310	0.0436152	0	0	0.198542	0.115269	0	0	0	0.0408268	0	0.00955066	0.0780102	0.154033	0.0146303	0	0	0	0	0	0.0204821	0	0.325041
GSM1249311	0	0.00389373	0	0.301552	0	0	0.0273626	0.00735521	0.0332843	0	0.0761868	0.0727723	0.221845	0.0436905	0	0	0	0	0.00100628	0	0	0.211051
GSM1249312	0.0120961	0.0387395	0.0015	0.193683	0.0422559	0.012532	0.0139957	0	0.0465882	0	0.0184408	0.077333	0.161519	0.000252817	0	0	0	0.00155454	0	0.0136266	0	0.365883
GSM1249313	0.0105934	0.0208251	0	0.315162	0.0215411	0	0	0	0.107084	0	0.0530692	0.117099	0.222801	0	0	0	0	0.00256577	0	0	0	0.12926
GSM1249314	0.0137402	0.00567547	0.0110646	0.288541	0.0377893	0	0.0142805	0	0.0411241	0	0	0.138079	0.22788	0	0	0	0	0.0106404	0	0	0	0.211185
GSM1249315	0.0171193	0	0.0136483	0.0894358	0.0604926	0.0289302	0.00828554	0	0.0135141	0	0.00549647	0.0803415	0.444567	0	0	0	0	0.0162052	0	0.0088176	0	0.213146
GSM1249316	0	0.0165164	0.00694828	0.361197	0.021602	0	0	0	0.0822967	0	0	0.17652	0.163125	0	0	0	0	0.00188884	0	0.00286386	0	0.167042
GSM1249317	0.000434833	0.0290733	0	0.0595042	0.0806285	0.0268587	0	0	0.0464591	0	0.00510885	0.0941958	0.213426	0.00817003	0	0	0	0.000306625	0	0.00742397	0	0.42841
GSM1249318	0	0.0017694	0	0.101543	0.0792462	0	0.00929304	0	0.0116822	0	0.0677123	0.103706	0.287737	0	0	0	0	0.00252666	0	0	0	0.334784
GSM1249319	0	0.0477974	0.0291889	0.329956	0.0748482	0	0	0	0.115471	0	0	0.159302	0.132014	0.00411267	0	0	0	0.00890055	0.00652365	0	0	0.0918852
GSM1249320	0	0.00750815	0	0.0997858	0.0579879	0.0623507	0	0	0.0235899	0	0.00754309	0.0561681	0.382011	0	0	0	0	0.00463803	0	0.00217803	0	0.296239
GSM1249321	0.0342995	0.0405249	0.00227723	0.196421	0.0408986	0.138872	0	0	0.0657755	0	0.0335499	0.0879092	0.220626	0	0	0	0	4.48828e-05	0.00489773	0	0	0.133903
GSM1249322	0.0151295	0.00671097	0	0.204533	0.0692447	0.00410353	0.00526483	0	0.0484139	0	0	0.0629354	0.102526	0.0234882	0	0.00316758	0	0.00120249	0	0.0056604	0	0.447619
GSM1249323	0	0.0662261	0.0198001	0.170303	0.0762101	0.0987848	0	0	0.0991224	0	0.0131497	0.0910056	0.102072	0	0	0.00333614	0	0.00980196	0	0	0	0.250188
GSM1249324	0	0.0164581	0.00825605	0.278216	0.00713615	0	0	0	0.0728917	0	0.130681	0.0426282	0.148129	0.015996	0	0.00354991	0	0	0	0.0185305	0	0.257528
GSM981627	0	0.0482654	0.0122833	0.111734	0.154654	0.0854464	0	0	0.0517218	0	0.000176237	0.104228	0.205991	0	0	0	0	0.0030014	0	0.00321063	0	0.219288
GSM981628	0.00555884	0.00968607	0.000641874	0.0768633	0.0745301	0.0374317	0.00487539	0	0.029749	0	0.0246503	0.0445145	0.383029	0.0215528	0	0	0	0	0	0.00825403	0	0.278663
GSM981629	0.00698171	0.0360842	0.0028348	0.143374	0.130065	0.0722877	0.0160965	0	0.050223	0	0.016506	0.0684849	0.157559	0	0	0	0	0.00224667	0.0060043	0	0	0.291252
GSM981630	0.0133225	0	0.0437839	0.0498851	0.0303972	0.0889995	0	0	0.00655776	0	0	0.0567221	0.109359	0.0186941	0	0.0194568	0	0	0	0.0281373	0	0.534685
GSM981631	0	0.0183483	0	0.0152186	0.113974	0.012144	0	0	0.0535772	0	0.00768666	0.0488121	0.208668	0.0229269	0	0	0	0.00979256	0	0.0678532	0	0.420998
GSM981632	0.0323806	0.00686631	0	0.218885	0.127801	0.062479	0	0	0.116888	0	0.0583277	0.0719643	0.208269	0.00458354	0	0	0	0.00499128	0	0.0131013	0.0118081	0.0616548
GSM981633	0	0.0310288	0	0.183807	0.101644	0.0540707	0	0	0.0984126	0	0.0234574	0.0860556	0.244187	0.020536	0	0	0	0.00532113	0	0.0180726	0.0136581	0.119749
GSM981634	0	0.00820562	0.00795879	0.135977	0.0830497	0.0418542	0	0	0.0269435	0	0	0.0910018	0.219335	0	0	0	0	0.00460456	0	0.00190206	0	0.379168
GSM981635	0.0312963	0	0	0.0392238	0.138977	0	0.0156048	0	0.0131154	0	0	0.0175462	0.160993	0.0591744	0	0	0	0	0.0186631	0	0	0.505406
GSM981636	0	0.0473264	0	0.0963728	0.125287	0.0274078	0	0	0.0506383	0	0.0328709	0.0335773	0.344777	0	0	0.011555	0	0.00352316	0	0.00206133	0	0.224602
GSM981637	0	0.0404751	0	0.0332825	0.082947	0.00361265	0	0	0.0499876	0	0.0127211	0.036646	0.288211	0	0	0	0	0.0119921	0.00536679	0	0	0.434758
GSM981638	0.0187838	0.0231111	0.0133833	0.36921	0.0118283	0	0.0206072	0	0.0668591	0	0	0.144191	0.152108	0	0	0.0221297	0	0.0043626	0	0	0	0.153427
GSM981639	0	0.0219115	0	0.0245771	0.0839662	0	0	0	0.0497416	0	0	0.0691583	0.277783	0.0415402	0	0	0	0	0	0.0150213	0	0.416301
GSM981640	0	0.0401227	0	0.0330227	0.126445	0	0	0	0.0539557	0	0	0.0481599	0.237571	0.0459179	0	0	0	0.00779703	0	0.0326779	0	0.37433
GSM981641	0.0181361	0.0267339	0	0.219656	0.0912203	0.0170767	0.044942	0	0.05371	0	0.0381665	0.080927	0.209491	0	0	0	0	0.000396723	0.00730175	0	0	0.192242
GSM981642	0.00336142	0.033223	0	0.2652	0.0759104	0	0	0	0.0908899	0	0	0.0990874	0.278905	0.00952075	0	0	0	0.0103901	0.00330104	0.00519287	0	0.125019
GSM981643	0.0139989	0.00565019	0	0.133561	0.134415	0.0605455	0.0104324	0	0.0665374	0	0	0.0749861	0.245833	0	0	0	0	0.00402663	0	0.0129765	0	0.237038
GSM981644	0	0.0166387	0	0.110533	0.081784	0.0389015	0.000433664	0	0.0305625	0	0.0303557	0.0483647	0.373632	0	0	0	0	0.00207554	0	0.00220167	0	0.264517
GSM981645	0.0271535	0	0	0.0104602	0.0581355	0.00960809	0	0	0.0459426	0	0	0.0456564	0.31085	0.0322838	0	0	0	0.00216664	0	0.0509221	0	0.406821
GSM981646	0	0.0417461	0	0.0308834	0.138867	0	0	0	0.0490845	0	0.00559263	0.0525282	0.3813	0	0	0	0	0.0115457	0.00613981	0.00123419	0	0.281078
GSM981647	0.012215	0.0102757	0	0.125368	0.0808166	0.0521935	0.0343103	0	0.0299526	0	0.0689981	0.0525394	0.212844	0.0147104	0	0.00154705	0	0.00294853	0	0.00375397	0	0.297527
GSM981648	0.00799895	0.0262209	0	0.0633834	0.101107	0.0314697	0	0	0.0243157	0	0.0398217	0.0116959	0.205274	0.0551866	0	0	0	0	0.00182005	0	0	0.431705
GSM981649	0	0.00337806	0	0.0591746	0.0271683	0	0	0	0.0567456	0	0	0.0464864	0.369473	0.047564	0	0	0	0	0	0.069171	0	0.320839
GSM981650	0.0782451	0.0811127	0	0.202209	0.0494092	0	0.00302912	0	0.0792036	0	7.78297e-05	0.0776048	0.269367	0.00207329	0	0	0	0.00491194	0.002836	0	0	0.14992
GSM981651	0.0703655	0	0	0.256195	0.0531028	0	0	0	0.0857242	0	0	0.121865	0.21878	0.016285	0	0	0	0	0.0156569	0	0	0.162026
GSM981652	0.00276183	0	0	0.0533829	0.0384074	0.000529878	0	0	0.0471842	0	0	0.0517457	0.218538	0.0342614	0	0	0	0	0	0.0747525	0	0.478437
GSM981653	0	0.0452182	0.0206326	0.124365	0.158254	0	0.0208554	0	0.0916895	0	0.0160349	0.133248	0.140494	0.056207	0	0	0	0.00813021	0.000424389	0.0065103	0	0.177937
GSM981654	0.00163505	0.00616245	0	0.21503	0.120579	0.00564176	0	0	0.106804	0	0.0347533	0.108075	0.186376	0.00354134	0	0	0	0	0	0.00265621	0	0.208746
GSM981655	0	0.0635824	0	0.127713	0.106642	0	0	0	0.0829162	0	0	0.0771864	0.213963	0	0	0	0	0.0129764	0	0.0103261	0	0.304695
GSM981656	0	0.0342722	0	0.0397879	0.10877	0	0	0	0.0454328	0	0	0.0419531	0.227251	0.0160585	0	0	0	0.0101946	0	0.0182169	0	0.458062
GSM981657	0.0112641	0.016618	0.00713342	0.207162	0.0602705	0	0	0	0.0950036	0	0.0229882	0.0966854	0.192272	0	0	0	0	0.00105722	0	0.0011188	0	0.288427
GSM981658	0	0.0106718	0.000189278	0.0688367	0.0602548	0.0480329	0	0	0.0307886	0	0.00152142	0.0369606	0.350603	0	0	0	0	0.00236144	0	0.0028918	0	0.386888
GSM981659	0.00953863	0.0185018	0	0.257228	0.118311	0	0	0	0.0760261	0	0.00235942	0.0861547	0.201836	0	0	0	0	0.00131198	0	0.000847035	0	0.227884
GSM981660	0.0126125	0.00349336	0	0.121421	0.0158746	0	0	0	0.0340896	0	0.00894107	0.057105	0.204035	0.0236808	0	0	0	0.000903405	0	0.0267238	0	0.49112
GSM981661	0	0.0668849	0	0.035903	0.0760885	0	0	0	0.0508542	0	0.0035135	0.0449466	0.213224	0.0278381	0	0	0	0	0	0.0352293	0	0.445518
GSM981662	0.000160206	0.0184509	0.00379284	0.172412	0.0491605	0.00396556	0.0352188	0	0.0177537	0	0.0198048	0.105342	0.235523	0	0	0	0	0.000893697	0.00404141	0	0	0.333481
GSM981663	0	0.0499203	0.00810375	0.160908	0.148446	0	0	0	0.0923113	0	0.0304121	0.0563335	0.148291	0.052922	0	0	0	0	0	0.0113613	0	0.240991
GSM981664	0	0.00441125	0	0.165937	0.0346739	0	0	0	0.0531051	0	0	0.111835	0.227064	0.00306807	0	0	0	0.00192723	0	0.00613235	0	0.391846
GSM981665	0	0.0139939	0.00582052	0.413336	0	0	0	0	0.103156	0	0.0182641	0.16898	0.144407	0.0175997	0	0	0	0	0.00574769	0	0	0.108696
GSM981666	0.0122184	0	0	0.0890061	0.051201	0	0.0054195	0	0.0454964	0	0.0251667	0.0454729	0.274819	0.0345343	0	0	0	0	0	0.0202759	0	0.396389
GSM981667	0.0491336	0	0.00446132	0.0687404	0.0201814	0.000989867	0	0	0.177027	0	0.0162237	0.0548652	0.276146	0.0578021	0	0	0	0	0	0.05721	0	0.217219
GSM981668	0	0.0188105	0	0.180262	0.0327794	0	0.00207322	0	0.0684973	0	0.00579935	0.0926397	0.238093	0.00816244	0	0	0	0.0021915	0	0.00298758	0	0.347704
GSM981669	0.0635596	0.00802533	0.0314083	0.193389	0.0668456	0.0251681	0.0227174	0	0.0458825	0	0.0263493	0.05286	0.0453623	0	0	0	0	0.00157268	0.00969369	0	0	0.407166
GSM981670	0.0250336	0	0.00605036	0.0598014	0.0370846	0.0121777	0.0065727	0	0.0284919	0	0.00467606	0.0361844	0.410285	0	0	0	0	0.00504659	0.0115512	0	0	0.357045
GSM981671	0	0.0171885	0	0.0765374	0.0117044	0.0352836	0.0206622	0	0.0253696	0	0.0256243	0.0316651	0.35001	0.0138549	0	0	0	0.00109599	0.000833441	0	0	0.39017
GSM981672	0	0.00608641	0	0.0965814	0.0581738	0	0	0	0.0471269	0	0	0.0709763	0.251807	0	0	0	0	0.0073104	0	0.00572785	0	0.45621
GSM981673	0.0135733	0	0	0.0213574	0.165517	0.00533856	0	0	0.0830961	0	0.0151201	0.0626116	0.231453	0	0	0	0	0.00886957	0	0.0427021	0	0.350361
GSM981674	0	0.0194091	0	0.0621662	0.0669871	0.0572874	4.56323e-05	0	0.0443753	0	0.00140119	0.0442503	0.328527	0.00237887	0	0	0	0.00353667	0	0.00509297	0	0.364542
GSM981675	0	0.00081008	0	0.0581178	0.0580335	0.0113256	0	0	0.0806503	0	0	0.056345	0.328567	0.0196631	0	0	0	0.0093693	9.07137e-05	0.00429754	0	0.37273
GSM981676	0	0.0884238	0	0.236451	0.118105	0	0.00543426	0	0.123512	0	0.0717405	0.111945	0.144595	0.00626913	0	0	0	0.00483819	0	0	0	0.0886855
GSM981677	0	0.0341826	0	0.194511	0.0914706	0	0.00720824	0	0.0605064	0	0.0472331	0.0822315	0.276471	0	0	0	0	0.00438756	0.00756774	0	0	0.19423
GSM981678	0.0096948	0.0120588	0	0.0303145	0.0439782	0	0	0	0.0383023	0.0056327	0	0.0386701	0	0.108298	0	0.0465969	0	0	0	0.0158779	0	0.650576
GSM981679	0.00804224	0	0.00174114	0.1274	0.0379446	0.0284786	0	0	0.0733924	0	0	0.152603	0.259411	0.0215046	0	0	0	0	0	0.0125688	0	0.276914
GSM981680	0	0.0125306	0.00204482	0.11072	0.0389153	0.035001	0	0	0.030538	0	0.00634062	0.0548983	0.0761572	0.00749728	0	0.0273612	0	0	0.00978502	0	0	0.588211
GSM981681	0.00676058	0.00745752	0	0.148284	0.0244027	0	0.00749227	0	0.0647889	0	0	0.0831502	0.284074	0	0	0	0	0.00241311	0	0	0	0.371178
GSM981682	0	0.0632908	0	0.113335	0.0323194	0	0	0	0.0820217	0	0.015163	0.0593587	0.272924	0.00152959	0	0	0	0.0101246	0	0.0411585	0	0.308775
GSM981683	0	0.0114161	0.000112502	0.136462	0.0437387	0.0467126	0	0	0.0366566	0	0.0156928	0.0475425	0.306409	0	0	0	0	0.00178274	0.00269366	0	0	0.350781
GSM981684	0.0235013	0	0	0.0533793	0.0430559	0.0129968	0	0	0.044114	0	0	0.0550826	0.315353	0.0159279	0	0	0	0	0	0	0	0.43659
GSM981685	0.00499038	0.0301317	0	0.155069	0	0.0528203	0	0	0.128521	0	0.0403919	0.156314	0.291769	0.0139329	0	0	0	0.000244104	0.0213364	0	0.0132693	0.09121
GSM981686	0	0.0328181	0	0.0824743	0.0941776	0	0.0044276	0	0.0549184	0	0.0274091	0.0654951	0.28917	0.0168472	0	0	0	0.0103897	0	0.0260657	0	0.295807
GSM981687	0.0250107	0.00180541	0.00285742	0.0777414	0.074363	0	0.0270371	0	0.0334133	0	0.0599033	0.0670814	0.175124	0.0262384	0	0	0	0	0.00161652	0	0	0.427809
GSM981688	0	0.00667922	0	0.05408	0.0152016	0.000813523	0.0324988	0	0.0194299	0	0.0271782	0.030496	0.290652	0	0	0	0	0.00563111	0	0	0	0.51734
GSM981689	0	0.0675391	0	0.172809	0.146607	0.0254922	0	0	0.106936	0	0.0104961	0.0687098	0.275613	0.0101819	0	0	0	0.00717034	0.00166708	0	0	0.106778
GSM981690	0.0101618	0.00842197	0	0.195341	0.12246	0	0	0	0.0583083	0	0.01101	0.0681655	0.179547	0	0	0	0	0.00102941	0	0.00214599	0	0.34341
GSM981691	0.00203584	0.00650836	0.000788148	0.0818301	0.0630161	0.051971	0	0	0.0422265	0	0.0108643	0.0712282	0.259452	0	0	0	0	0.00200724	0	0.00885749	0	0.399215
GSM981692	0.0227174	0.00394466	0.0394321	0.222213	0.0799229	0	0.0523236	0	0.0280337	0	0.0151189	0.178932	0.144438	0.00582637	0	0.00157649	0	0.00368769	0	0.000823677	0	0.201009
GSM981693	0.0110814	0.0176442	0.00703838	0.0797431	0.120458	0.0920186	0.0133535	0	0.0516835	0	0.0263108	0.0793588	0.204451	0	0	0	0	0.0097024	0	0	0	0.287156
GSM981694	0	0.0510153	0	0.316825	0.0146302	0	0.00669903	0	0.0871329	0	0	0.171175	0.201002	0	0	0.0228563	0	0.0105757	0.000279092	0	0	0.117809
GSM981695	0.0287759	0.00791143	0.00523671	0.134123	0.0621491	0.01437	0	0	0.0403516	0	0	0.149811	0.194705	0	0	0	0	0.000883176	0.0101452	0	0	0.351538
GSM981696	0	0.0429763	0.00375962	0.132089	0.0739427	0.0134738	0	0	0.0673888	0	0	0.0738452	0.14144	0	0	0.00364644	0	0.009048	0	0	0	0.438391
GSM981697	0	0.0499519	0.00320026	0.397398	0	0	0.0492201	0	0.0573977	0	0.00846958	0.134058	0.154297	0.00492046	0	0	0	0.00216898	0.0090493	0	0	0.129869
GSM981698	0	0.0241091	0.00177795	0.290232	0	0	0	0	0.0414161	0	0.0208011	0.0926954	0.209296	0.0324738	0	0.0159219	0	0	0.000991568	0	0	0.270285
GSM981699	0.00923104	0	0	0.170303	0.00908488	0	0	0	0.049415	0	0.0290486	0.0648378	0.368441	0.030907	0	0	0	0	0	0.0125128	0	0.25622
GSM981700	0	0.00744736	0	0.307444	0.0233355	0	0.00888601	0	0.0738989	0	0.100439	0.106571	0.1979	0.0375953	0	0	0	0	0	0	0	0.136483
GSM981701	0	0.0524825	0	0.22294	0.0319665	0	0	0	0.0738895	0	0	0.100626	0.173553	0	0	0	0	0.011026	0.00414372	0.00540148	0	0.323971
GSM981702	0	0.0122071	0.000658477	0.397773	0.00156091	0	0.0286313	0	0.0956762	0	0	0.113991	0.153157	0.018344	0	0	0	0.00145166	0.00545521	0	0	0.171093
GSM981703	0	0.0263645	0	0.388614	0	0	0	0	0.0410273	0	0	0.191616	0.162298	0.0195046	0	0	0	0	0	0.00487815	0	0.165697
GSM981704	0	0.0640335	0	0.136825	0.0563885	0	0	0	0.077026	0	0	0.105563	0.296439	0.02635	0	0	0	0	0	0.0150078	0	0.222367
GSM981705	0	0.0281231	0	0.132613	0.07511	0	0	0	0.0600699	0	0.0162054	0.0361318	0.239603	0	0	0	0	0.00414249	0	0.0274258	0	0.380576
GSM981706	0.00905534	0	0	0.1544	0.0309037	0	0	0	0.0250986	0	0	0.0675083	0.220918	0.03866	0	0	0	0	0	0	0	0.453455
GSM981707	0	0.00702558	0	0.265323	0.000723514	0	0.0113893	0	0.039632	0	0	0.101993	0.221028	0.0172759	0	0	0	0	0	0.030756	0	0.304853
GSM981708	0	0.0261594	0	0.192494	0.0162007	0.0511572	0	0	0.0116479	0	0	0.137071	0.213073	0	0	0	0	0.00105522	0.000319683	0	0	0.350823
GSM981709	0	0.0247218	0	0.239712	0.0872188	0	0	0	0.0895669	0	0.0214542	0.120086	0.270238	0	0	0	0	0.00342308	0	0.0137816	0	0.129798
GSM981710	0	0.0295089	0	0.239933	0.0179498	0	0	0	0.0763211	0	0.0250567	0.155158	0.180105	0.00498207	0	0	0	0.00286053	0	0.0317621	0	0.236364
GSM981711	0	0.0839435	0.0258389	0.176581	0.0735234	0	0	0	0.033385	0	0	0.160874	0.217033	0.0391214	0	0.0368024	0	0.00534882	0.0117758	0	0	0.135773
GSM981712	0	0.026372	0	0.413804	0.116998	0.00216067	0	0	0.0237334	0	0	0.148993	0.190065	0	0	0.00555684	0	0.000979323	0	0	0	0.0713381
GSM981713	0	0.0570545	0	0.169109	0.111217	0.00699692	0	0	0.0590127	0	0.0259781	0.039802	0.325276	0	0	0	0	0.00905718	0	0	0	0.196496
GSM981714	0	0.00640954	0	0.169857	0.0426781	0	0	0	0.00615191	0	0	0.139502	0.384219	0.00196909	0	0.0209411	0	0.00225502	0.00475128	0	0	0.221266
GSM981715	0.00236548	0.0128764	0.0277061	0.154822	0.0774954	0	0	0	0.0470095	0	0	0.117701	0.0761554	0.0445241	0	0.0369506	0	0.000276392	0	0.00662289	0	0.395494
GSM981716	0.00961329	0	0.0133935	0.210422	0	0	0	0	0.0525586	0	0	0.10351	0.148605	0.0239701	0	0	0	0.00802811	0	0.0177659	0	0.412133
GSM981717	0.000418466	0.011169	0	0.24282	0.0238822	0	0	0	0.0458381	0	0	0.0678494	0.223913	0	0	0	0	0.00884106	0.00154819	0	0	0.373721
GSM981718	0	0.0397183	0	0.277508	0.0368433	0	0	0	0.081752	0	0	0.19521	0.215391	0	0	0	0	0.00255411	0	0.00468188	0	0.146341
GSM981719	0.00566062	0.0181613	0	0.181564	0.0277463	0	0	0	0.0412108	0	0	0.0906768	0.223047	0.0126162	0	0	0	0.00271888	0	0.0211441	0	0.375453
GSM981720	0	0.00830323	0	0.152082	0.0122677	0	0.0238366	0	0.0110115	0	0	0.0853289	0.279197	0.0205946	0	0	0	0	0.00594359	0	0	0.401435
GSM981721	0.0145935	0.00333957	0.00105309	0.185193	0.0419392	0	0	0	0.0652433	0	0	0.213026	0.207523	0.0232983	0	0	0	0	0.00189452	0	0	0.242896
GSM981722	0	0.00907828	0	0.0959741	0.00863632	0	0	0	0.034031	0	0	0.0535463	0.284377	0.0315524	0	0	0	0.00127729	0.0045206	0	0	0.477007
GSM981723	0	0.014825	0	0.235401	0.0527266	0	0	0	0.0334359	0	0.0411014	0.0688082	0.240711	0.0133089	0	0	0	0	0	0	0	0.299682
GSM981724	0	0.00314158	0	0.18289	0	0	0	0	0.0469611	0	0	0.118797	0.253019	0.0188056	0	0	0	0	0	0.00842259	0	0.367963
GSM981725	0	0.0187118	0	0.1666	0.0496467	0	0.026415	0	0.0335129	0	0.0174129	0.0602549	0.0557105	0.0402624	0	0	0	0.00122607	0.0216102	0	0	0.508636
GSM981726	0	0.0479988	0	0.169926	0.0293825	0	0	0	0.10082	0	0.0107287	0.077731	0.265519	0	0	0	0	0.00965026	0.00708946	0	0	0.281154
GSM981727	0	0.0324809	0	0.165635	0	0	0	0	0.0858547	0	0	0.0691207	0.248788	0.0561342	0	0	0	0	0	0.00913517	0	0.332852
GSM981728	0	0.0224152	0	0.155814	0.0103606	0	0	0	0.0472802	0	0	0.082566	0.267213	0	0	0	0	0.00584719	0	0.0106221	0	0.397881
GSM981729	0.00015518	0.00847229	0	0.22851	0	0	0	0	0.0550365	0	0	0.19046	0.243906	0.0183036	0	0.0134275	0	0	0	0.0194369	0	0.222291
GSM981730	0	0.0181638	0	0.109007	0	0	0	0.00190901	0.05006	0	0	0.0891393	0.132658	0.0277443	0	0	0	0.00109517	0	0.0538108	0	0.516412
GSM981731	0.00818276	0.00776586	0	0.0743682	0.0584522	0	0	0	0.0616437	0	0.0124917	0.047679	0.225813	0.0160388	0	0	0	0.00279826	0	0.0352093	0	0.449557
GSM981732	0.0334487	0.0181546	0	0.327679	0.0225581	0	0	0	0.0710374	0	0.0301905	0.132635	0.196895	0	0	0.00946272	0	0	0.00493727	0	0	0.153002
GSM981733	0.026998	0.0301761	0	0.259934	0.0605289	0	0	0	0.10173	0	0	0.142994	0.215792	0	0	0	0	0.00244827	0	0.015431	0	0.143968
GSM981734	0.0095275	0.00677996	0.00925577	0.233232	0	0	0	0	0.0543834	0	0	0.200844	0.172766	0.00198208	0	0	0	0.000601208	0	0.00854637	0	0.302082
GSM981735	0	0.0453637	0	0.133834	0.0469249	0	0	0	0.0427125	0	0.0284644	0.0391004	0.275391	0.0457647	0	0	0	0.00179025	0	0.0353211	0	0.305333
GSM981736	0	0.0144314	0	0.178493	0.03039	0	0	0	0.0843141	0	0.0171525	0.0925626	0.345897	0.00834278	0	0	0	0.00246696	0	0.0183178	0	0.207632
GSM981737	0	0.0521249	0	0.0963016	0.0789541	0	0	0	0.0812094	0	0.0462154	0.0529335	0.175119	0	0	0.0135826	0	0	0	0	0	0.40356
GSM996267	0	0.0128705	0	0.0677694	0.0873929	0	0	0	0.0223044	0	0.0834538	0	0.299236	0.0429203	0	0	0	0.00387934	0.00603062	0	0	0.374143
GSM996268	0.0739191	0	0	0.0547374	0.0630381	0.045972	0.0251385	0	0	0	0.0754987	0	0.174134	0.0348794	0	0	0	3.72719e-05	0	0.0210182	0	0.431627
GSM996269	0	0.0133832	0	0.0928483	0.113676	0	0.0290652	0	0.0123279	0	0.125181	0.000211197	0.283443	0.038665	0	0	0	0	0.011857	0	0	0.279343
GSM996270	0.00531649	0.00189098	0	0.00751984	0.0620771	0.0223653	0.0203232	0	0.000436191	0	0.0635824	0	0.212815	0.0753802	0	0	0	0.0078768	0.00875373	0	0	0.511663
GSM996271	0.0217525	0	0	0.10265	0.0646814	0	0.0363523	0	0.0030103	0	0.0792829	0	0.242987	0	0	0	0	0.0332398	0.00404391	0	0	0.411999
GSM996272	0	0.00142974	0	0.12123	0.0305919	0	0.0297751	0	0.0304077	0	0.108068	0.00631328	0.313664	0.0344593	0	0	0	0	0.0155959	0	0.0171654	0.291299
GSM996273	0	0.0182262	0	0.172262	0.00975103	0	0.0546863	0	0.0171385	0	0.118717	0	0.325603	0	0.000915564	0	0	0.0239058	0	0	0	0.258794
GSM996274	0.0163776	0	0	0.155678	0.0846728	0	0.0374888	0	0.000623767	0	0.0336461	0.0359894	0.188985	0.0411477	0	0	0	0	0	0	0	0.40539
GSM996275	0.0082363	0.00191605	1.84201e-05	0.132421	0.0946638	0	0.0622781	0	0.00963156	0	0.119356	0	0.214875	0.00834137	0	0	0	0.00712514	0.0108347	0	0	0.330303
GSM996276	0.0337489	0	0	0.0951199	0.0238661	0.022597	0.00415085	0	0.0286297	0	0.0770272	0.0179442	0.326529	0	0	0	0	0.00546654	0.00147495	0	0	0.363446
GSM996277	0	0.00598447	0	0.0958757	0.0585076	0	0.08225	0	0	0	0.122764	0	0.292426	0.0299126	0	0	0	0	0	0.0167866	0.00150095	0.293992
GSM996278	0.0449798	0	0	0.0492667	0.0813495	0	0.00270929	0	0.016535	0	0.0542194	0.0163132	0.264676	0.0908651	0	0	0	0	0	0.00703971	0	0.372046
GSM996279	0.00892986	0.00572217	0	0.0348935	0.0942307	0.0181446	0.0110055	0	0.00158934	0	0.0668198	0	0.243775	0.0768241	0	0	0	0	0	0.00535389	0	0.432712
GSM996280	0	0.00380639	0	0.0357885	0.0614527	0.0310147	0.0146885	0	0	0	0.110391	0	0.21203	0.0730251	0	0	0	0.00116785	0	0.0221975	0	0.434438
GSM996281	0	0.000622054	0	0.199827	0.00738171	0	0.0735259	0	0.00562407	0	0.171139	0.011657	0.255393	0.0125833	0	0	0	0.0010853	0.0153513	0	0	0.24581
GSM996282	0	0.00446417	0	0.080591	0.0578307	0	0.00787666	0	0.00458668	0	0.0478452	0.00259444	0.32517	0.0351631	0	0	0	0	0	0.0105615	0	0.423317
GSM996283	0	0.00182707	0	0.0697659	0.0520349	0	0.0621275	0	0.00529549	0	0.141428	0	0.262704	0.0251181	0	0	0	0	0.00356398	0	0	0.376135
GSM996284	0.00456572	0	0	0.0924315	0.0203345	0	0.021621	0	0.000126386	0	0.0312397	0.00943216	0.267213	0.0493334	0	0	0	0.00272365	0	0.011898	0	0.489081
GSM996285	0	0.0148097	0	0.0514898	0.127939	0	0.0282254	0	0.00184625	0	0.0838105	0	0.353368	0.041365	0	0	0	0.00164669	0.0185107	0	0	0.276988
GSM996286	0.0166135	0	0	0.203332	0.079765	0	0.0220938	0	0.00774273	0	0.0151738	0.06021	0.218399	0.0359237	0	0	0	0	0.0123979	0	0	0.328349
GSM996287	0.0651576	0	0	0.0849703	0.122428	0.021913	0.0368522	0	0	0	0.0787279	0	0.287653	0	0	0	0	0.0123543	0.00216439	0	0	0.28778
GSM996288	0.0167332	0	0	0.104065	0.0790513	0	0.0608781	0	0	0	0.0940055	0	0.336044	0	0	0	0	0.00403265	0.00527182	0	0	0.299918
GSM996289	0	0	0	0.0715639	0.115943	0	0.00963604	0	0.0451907	0	0.0448089	0.0187258	0.390822	0.0298541	0	0	0	0.00971064	0	0	0	0.263745
GSM996290	0	0.00697166	0	0.128449	0.115546	0	0.0648252	0	0	0	0.117342	0	0.180125	0.0250212	0	0.0135866	0	0.00215335	0.00650106	0	0	0.33948
GSM996291	0.00684002	0.0140761	0	0.155616	0.113019	0	0.0543848	0	0	0	0.0829269	0.00429685	0.27007	0	0	0	0	0.00279258	0.0017514	0	0	0.294227
GSM996292	0.0226935	0.0209665	0	0.172818	0.103199	0	0.069807	0	0	0	0.141838	0	0.222317	0.0117315	0	0	0	0.0106455	0.00420081	0	0	0.219783
GSM996293	0	0	0	0.062348	0.0581713	0	0.0448995	0	0	0	0.0623826	0	0.234839	0.0142135	0	0	0	0.00360185	0	0.060824	0	0.45872
GSM996294	0.027694	0	0	0.18734	0.0846378	0	0.0202475	0	0.0537914	0	0.0750518	0	0.276586	0.0296229	0	0	0	0.0124581	0.000676141	0	0	0.231894
GSM996295	0	0.0226918	0.0029877	0.0162583	0.162104	0	0	0	0.0232258	0	0.114756	0	0.334276	0.0318665	0	0	0	0.000869149	0	0.012043	0.00933314	0.269589
GSM996296	0.0175532	0	0.000805197	0.102569	0.0993698	0	0.041302	0	0	0	0.103442	0	0.30491	0	0	0	0	0.00411345	0.0196807	0	0	0.306255
GSM996297	0.0741172	0	0	0.130449	0.10164	0.0223006	0.0369303	0	0.0103291	0	0.100355	0.0282767	0.289018	0.0169207	0	0	0	0.00259269	0.0139874	0	0.0194014	0.153681
GSM996298	0	0	0	0.0594929	0.0581187	0	0.0350876	0	0	0	0.0290143	0.00414932	0.280686	0.021238	0	0	0	0.00553797	0	0	0	0.506676
GSM996299	0	0.00630468	0	0.128859	0.0484733	0	0.0543336	0	0	0	0.0705105	0.00391986	0.24663	0.0311706	0	0	0	0.00203828	0.023712	0	0	0.384048
GSM996300	0.0732331	0	0	0.102028	0.12238	0.0196497	0.065859	0	0.0229966	0	0.100723	0	0.22511	0	0	0	0	0.00636818	0	0.000107121	0	0.261545
GSM996311	0	0.00869044	0.013457	0.0144352	0.096272	0	0.0268653	0	0	0	0.049263	0.0111548	0.365902	0	0	0	0	0.0230449	0	0.00701336	0	0.383902
GSM996312	0.00280598	0.000542569	0	0.104968	0.0997744	0	0.0141389	0	0.0216696	0	0.0542692	0.00601715	0.361501	0.0149717	0	0	0	0.00458713	0	0.0098276	0	0.304927
GSM996314	0.0191088	0	0	0.0449487	0.082622	0	0.0238916	0	0.036819	0	0.0906579	0	0.298536	0.0449655	0	0	0	0.00701398	0.00148738	0.0055235	0	0.344426
GSM996317	0.0085352	0.000599435	0	0.172495	0.0767083	0.0127023	0.0103823	0	0.0501705	0	0.0846859	0	0.346384	0	0	0	0	0.000798103	0.0132537	0	0.0533298	0.169956
GSM996318	0.0323716	0	0.00545967	0.216781	0.109837	0	0.0386137	0	0.00592878	0	0.121041	0.0490011	0.296474	0.0114041	0	0	0	0.00174686	0.00766753	0	0	0.103674
GSM996319	0.00710376	0.00405386	0	0.298031	0.0682628	0	0.0538901	0	0.00260591	0	0.118127	0.0201033	0.22706	0	0	0	0	0.00475315	0.00664848	0	0	0.189361
GSM996320	0.0561521	0	0	0.0425662	0.0786876	0.0154438	0.0163185	0	0.0277059	0	0.0938472	0	0.334711	0.065512	0	0	0	0.00832395	0	0.0032498	0	0.257482
GSM996322	0	0	0	0.0591337	0.0823944	0	0.0112589	0	0.0264367	0.0033531	0.090351	0.00786163	0.417973	0	0	0	0	0.0132294	0	0.030908	0	0.2571
GSM996325	0.0167361	0.0541624	0.0576919	0.210608	0.0712085	0	0	0	0.258403	0	0.127864	0	0.0487881	0.118032	0	0	0	0	0.00797666	0	0	0.028529
GSM996326	0	0.00707191	0	0.198018	0.0244737	0	0.0463648	0	0.0233558	0	0.104532	0.0132933	0.177659	0.0295817	0	0	0	0.00102661	0.0135873	0	0	0.361036
GSM996328	0	0.00513144	0	0.0544366	0.0678738	0	0.0263236	0	0.00653259	0	0.0850991	0	0.33181	0.0261628	0	0	0	0	0.00355447	0	0	0.393076
GSM996329	0	0.00811702	0.0127846	0.196013	0.0403906	0	0.0994611	0	0	0	0.129749	0	0.175583	0.0245092	0	0.010946	0	0	0	0	0	0.302447
GSM996330	0.00962521	0.00468808	0.00826684	0.257724	0.0834104	0	0	0	0.0607944	0	0.116757	0.0486329	0.242866	0.00348736	0	0	0	0	0.000179581	0	0	0.163569
GSM996331	0.00932146	0	0	0.190195	0.0803937	0	0.0401556	0	0.0198265	0	0.204021	0	0.291566	0	0	0	0	0.00219492	0.00515442	0	0	0.157171
GSM996332	0.0717749	0	0	0.0826708	0.106254	0	0.00535021	0	0.0154229	0	0.0509186	0	0.284336	0.0242516	0	0	0	0	0	0.0453625	0	0.313659
GSM996333	0	0.00312931	0	0.0597838	0.104357	0	0.036664	0	0.00992152	0	0.0643061	0	0.339444	0.00293772	0	0	0	0.00941706	0	0.0030601	0.00229565	0.364684
GSM996335	0.0133029	0.00686749	0	0.138201	0.0580066	0	0.0278221	0	0.0132486	0	0.0694589	0	0.291777	0.031417	0	0	0	0.00273488	0	0.00867157	0	0.338492
GSM996337	0	0.00778112	0	0.0951204	0.0759105	0	0.00714039	0	0.0112986	0	0.0644418	0.00832534	0.269315	0.0378287	0	0	0	0.00103742	0.00724249	0	0	0.414558
GSM996338	0	0.00504084	0	0.100172	0.0927529	0	0.0306492	0	0.00509447	0	0.0694566	0.0017149	0.310105	0.0244686	0	0	0	0.000112858	0	0.0161147	0	0.344318
GSM996339	0.0109404	0	0	0	0.0997626	0.00453489	0.00570726	0	0.0418406	0.0200136	0.096773	0	0.397932	0.0252158	0	0	0	0.0117086	0	0.00472228	0	0.280849
GSM996341	0.00991451	0.00441441	0.0333947	0.143977	0.143951	0.00178008	0	0	0.0396564	0	0.0701834	0.0243517	0.132794	0	0	0	0	0.000407733	0	0	0	0.395175
GSM996342	0.0186326	0	0	0.205303	0.114592	0	0.0882602	0	0	0	0.12516	0	0.262603	0.0121753	0	0	0	0.00115694	0.00210767	0	0.00252334	0.167486
GSM996343	0.000947116	0.00240907	0	0.136696	0.0938603	0.00481619	0.0365143	0	0.0285501	0	0.121364	0.016226	0.290537	0.0110484	0	0	0	0.00141667	0	0.00139191	0	0.254223
GSM996344	0.0190164	0	0	0.0930618	0.0990863	0.00331155	0	0	0.018275	0	0.10022	0	0.242531	0.0420264	0	0	0	0.00647329	0	0.0217184	0	0.35428
GSM996345	0.0256088	0	0	0.127063	0.136475	0	0.022466	0	0.0226744	0	0.0952218	0.0144393	0.400353	0	0	0	0	0.00186216	0.00379422	0	0	0.150043
GSM996346	0.00673226	0	0	0.157176	0.095534	0	0.0318071	0	0.00762338	0	0.119997	0	0.236809	0.0013151	0	0	0	0.00577612	0.00753053	0	0	0.329699
GSM996347	0.0239116	0	0	0.240129	0.0667535	0	0.0167201	0	0.0268887	0	0.214822	0	0.254333	0	0	0	0	0.00423039	0	0.004015	0	0.148197
GSM996348	0	0.0067993	0	0.124081	0.14183	0	0.0230328	0	0.0218603	0	0.156339	0.00202099	0.317135	0.0046873	0	0	0	0.00117458	0	0.00135804	0	0.199682
GSM996349	0.030642	0.00286351	0	0.182102	0.0861083	0	0.0275479	0	0.0183216	0	0.10418	0.0289877	0.293217	0.0151307	0	0	0	0.0112866	0.00270052	0	0	0.196912
GSM996350	0.0090744	0.00236698	0	0.0779441	0.0875402	0.0177911	0.00333691	0	0.00156757	0	0.0811966	0	0.253715	0.0316063	0	0	0	0.00243979	0	0.0319371	0	0.399484
GSM996352	0.010024	0	0.00828873	0.248782	0.0859369	0	0.0227387	0	0.0238122	0	0.124307	0.0165618	0.268407	0	0	0	0	0.00163663	0	0.00151745	0	0.187988
GSM996354	0.00962637	0.015585	0	0.222226	0.1213	0.00776922	0.0394057	0	0	0	0.114801	0	0.183246	0.0235744	0	0	0	0	0	0	0	0.262468
GSM996355	0	0.0139637	0	0.0468998	0.0827305	0.00724638	0.0243887	0	0.000321245	0	0.0502562	0	0.188612	0.0295374	0	0	0	0.00194336	0	0	0	0.554101
GSM996356	0.0261382	0	0	0.202342	0.0623095	0	0.0819538	0	0.0181338	0	0.102254	0.031185	0.232573	0	0	0	0	0.00588467	0	0.00851282	0	0.228713
GSM996359	0	0.0125262	0	0.0671427	0.0995808	0	0	0	0.0229827	0	0.147965	0	0.311494	0.0199083	0	0	0	0.00714841	0	4.46166e-05	0	0.311208
GSM996360	0.00228233	0.0077334	0	0.138569	0.123898	0	0.0427369	0	0.026987	0	0.142048	0	0.221357	0.00651278	0	0	0	0.00396795	0	0.0151358	0	0.268771
GSM996361	0.0133998	0	0	0.0191838	0.0967373	0	0.0291706	0	0.0195992	0	0.0952017	0	0.360233	0	0	0	0	0.0121759	0	0.00615605	0	0.348143
GSM996365	0.0214026	0	0	0.174804	0.122545	0	0.0034711	0	0.0455218	0	0.12582	0	0.167734	0.0727521	0	0	0	0	0	0	0.0162946	0.249655
GSM996368	0.00108672	0.00348605	0	0.138579	0.0522837	0.00720272	0.0848815	0	0.00680285	0	0.250378	0	0.194189	0	0	0.00330201	0	0.00347729	0.000840149	0	0	0.253491
GSM996369	0.0205122	0	0	0.0934752	0.0367623	0.00844665	0.080326	0	0	0	0.159414	0.00891375	0.19451	0	0	0.0178484	0	0.0115529	0	0.0774397	0	0.290798
GSM996371	0	0.0180101	0	0.0803374	0.116001	0	0.0155687	0	0	0	0.0800445	0	0.298562	0.0267193	0	0	0	0.00281545	0.00411535	0	0	0.357826
GSM996372	0.0109969	0.0148756	0	0.223266	0.0564801	0	0.020741	0	0.0364193	0	0.100113	0.0158294	0.340687	0	0	0	0	0.00309846	0.00361231	0	0	0.173881
GSM996373	0.0149099	0	0	0.173278	0.0842511	0	0.00414842	0	0.0244409	0	0.0509363	0	0.252406	0.0343267	0	0	0	0	0	0.0166964	0	0.344606
GSM996374	0.00289286	0.000357528	0.00721461	0.0912338	0.0979621	0.0140845	0.0250466	0	0.00685293	0	0.0856032	0	0.277644	0.016766	0	0	0	0.00250018	0	0.0312947	0	0.340547
GSM996375	0.0276458	0	0.00647748	0.0679561	0.0207221	0	0.0252451	0	0.00466192	0	0.021862	0.005789	0.256263	0.0464242	0	0	0	0.00115778	0	0.0238554	0	0.49194
GSM996376	0.0212459	0	0.00829479	0.383841	0.137491	0	0.033842	0	0.0221192	0	0.12581	0.0383426	0.165981	0.00623417	0	0	0	0.00127984	0.00653924	0	0	0.0489787
GSM996378	0.0366375	0.0125288	0.0013398	0.222814	0.0455553	0	0.0406865	0	0.0365937	0	0.135576	0.0149564	0.256407	0	0	0	0	0.00246534	0.00824192	0	0	0.186198
GSM996379	0.00955461	0	0	0.154897	0.107018	0.0318797	0.0549681	0	0	0	0.155834	0	0.245577	0	0	0	0	0.00273924	0	0	0	0.237533
GSM996380	0	0.018636	0	0.197251	0.123092	0	0	0	0.0266404	0	0.0477017	0.0264231	0.153489	0	0	0	0	0.00171617	0	0.00746431	0	0.397586
GSM996381	0.0630308	0	0.00229694	0.131561	0.0647124	0	0.0731134	0	0.00479923	0	0.108694	0	0.164183	0.0198035	0	0.0066902	0	0.00126705	0.00445426	0	0	0.355394
GSM996383	0.00363144	0	0.00111539	0.154387	0.0644624	0	0.0313904	0	0.0108664	0	0.0683449	0.0289835	0.281117	0.0124368	0	0	0	0.00301578	0.0138529	0	0	0.326397
GSM996384	0.0114772	0	0.000951505	0.057483	0.00275206	0	0.0276766	0	0.00255664	0	0.0529067	0	0.303917	0.0290613	0	0	0	0.000536308	0	0.0388409	0	0.471841
GSM996386	0	0.0128204	0	0.0806604	0.111773	0	0.0075183	0	0.0338631	0	0.0994178	0	0.367106	0.0278167	0	0	0	0.00229247	0.00160747	0	0.0104703	0.244654
GSM996387	0	0.00784835	0	0.147833	0.041616	0	0.00791043	0	0.0175393	0	0.0602276	0.00134445	0.392453	0	0	0	0	0.00266094	0.000699656	0	0	0.319867
GSM996388	0.00829341	0	0.00366188	0.0589405	0.067793	0	0.0105391	0	0.0160361	0	0.0504312	0	0.16601	0.0444324	0	0	0	0.00879377	0	0.0528177	0	0.512251
GSM996390	0	0.0107024	0.00993407	0.139119	0.061426	0	0.0145015	0	0.0122932	0	0.0104834	0.0284946	0.393506	0.0198659	0	0	0	0.00142418	0	0.00257871	0	0.295671
GSM996391	0.0123845	0.0049502	0	0.154907	0.120976	0	0.109583	0	0	0	0.218426	0	0.20472	0	0	0	0	0.00194274	0	0	0	0.172111
GSM996392	0.040364	0	0	0.146226	0.0563797	0.0286835	0.0483455	0	0.00911032	0	0.150616	0	0.248487	0.0156512	0	0	0	0.00210651	0	0.0241372	0	0.229894
GSM996393	0.008468	0	0	0.0476102	0.0726376	0	0	0	0.0142411	0	0.0374453	0.00687537	0.434721	0.0621736	0	0	0	0.00423786	0	0.0340103	0	0.27758
GSM996394	0	0.00693994	0	0.0821552	0.106961	0	0	0	0.0076261	0	0.0439456	0.00921772	0.263621	0.0357071	0	0	0	0.00110126	0	0.0169646	0	0.425761
GSM996395	0.0190146	0.0048836	0	0.0996801	0.120397	0	0.0240148	0	0.0321464	0	0.0881794	0	0.428795	0	0	0	0	0.00642746	0.00856146	0	0	0.167901
GSM996396	0.00210378	0	0.0137224	0.142152	0.115544	0	0.00810868	0	0.0209898	0	0.0443665	0.0346663	0.226445	0.00902499	0	0	0	0.00580796	0	0.006939	0	0.37013
GSM996398	0.000320981	0.00567589	0	0.201177	0.0987687	0	0.0237461	0	0.00872161	0	0.0621351	0.00654629	0.25896	0.0204639	0	0	0	0.0156935	0	0.0126733	0	0.285117
GSM996399	0	0.00410924	0	0.161449	0.133414	0.00953837	0.0148298	0	0.0173154	0	0.095591	0	0.226975	0.0433546	0	0	0	0.000311294	0	0.0152811	0	0.277831
GSM996400	0	0.00972203	0	0.146815	0.0456085	0	0.0041885	0	0.00838647	0	0.129257	0	0.144219	0.0064732	0	0	0	0.00172672	0	0.0126088	0	0.490994
GSM996401	0.0552245	0	0	0.100531	0.0667208	0	0.0620807	0	0.00344649	0	0.0724089	0	0.182336	0.0241275	0	0	0	0.0034288	0	0	0	0.429695
GSM996402	0	0.0116653	0.00912809	0.051336	0.0655003	0.017813	0.0134984	0	0.0101047	0	0.0513197	0.0111676	0.193112	0.0227747	0	0	0	0	0.00252691	0	0	0.540053
GSM996403	0.00873451	0.00205652	0	0.0738542	0.0651863	0.00270364	0.0101986	0	0.0329368	0	0.108412	0	0.272906	0.0140657	0	0	0	0.00317664	0	0.0345476	0	0.371222
GSM996404	0.00813814	0	0.00981205	0.0517162	0.0844209	0	0.0310695	0	0.00965866	0	0.057533	0	0.219775	0.0411887	0	0	0	0	0	0.0441434	0	0.442545
GSM996405	0	0.007249	0	0.201714	0.0534094	0	0.105817	0	0	0	0.154756	0	0.221993	0.00771791	0	0	0	0.00136397	0.00938996	0	0	0.236589
GSM996406	0.00558167	0.016274	0	0.180129	0.107162	0	0.00609896	0	0.0302051	0	0.0447044	0.000523736	0.260722	0.0162123	0	0	0	0.0028299	0	0.0149706	0	0.314586
GSM996407	0.0132309	0.00581379	0	0.204111	0.104129	0	0.0425133	0	0.0405174	0	0.183162	0	0.241245	0.00412863	0	0	0	0	0.00306037	0	0	0.158089
GSM996408	0	0.0113138	0.0100344	0.0493458	0.0329637	0	0	0	0.0134688	0	0.0534585	0.00232095	0.385073	0.0788831	0	0	0	0	0	0.027415	0	0.335723
GSM996409	0.0158651	0	0.0238773	0.0912605	0.0620186	0.0287948	0.0406372	0	0	0	0.0855198	0	0.3185	0.0309494	0	0	0	0.000204719	0	0.0308957	0	0.271477
GSM996410	0.017898	0	0.00527065	0.00820465	0.0364015	0	0	0	0.0157286	0	0.0176658	0	0.23811	0.0577024	0	0	0	0.00733897	0	0.0437402	0	0.551939
GSM996412	0	0.0165083	0	0.310444	0.0774305	0	0.0135122	0	0.0360145	0	0.170211	0.0146609	0.21328	0.0118198	0	0	0	0.00148541	0.0117884	0	0.0057421	0.117103
GSM996414	0	0.0263221	0	0.19998	0.0422307	0.0205188	0.015837	0	0.0310662	0	0.103882	0.000740318	0.248837	0	0	0	0	0.0027646	0.00900378	0	0	0.298817
GSM996415	0.00286618	0	0.00124685	0.107623	0.0758617	0	0	0	0.0174487	0	0.0664008	0	0.21507	0.0494548	0	0	0	0	0	0.036398	0	0.42763
GSM996417	0	0.00694185	0	0.129207	0.122898	0	0	0	0.0124876	0	0.0493786	0.00158318	0.234328	0	0	0	0	0.00378868	0	0	0	0.439388
GSM996419	0.0262798	0	0	0.130471	0.151184	0	0.012117	0	0.0409595	0	0.0821817	0.000753428	0.312602	0.0358735	0	0	0	0.0104245	0	0.00588923	0	0.191265
GSM996420	0	0.00518308	0.00246609	0.0873756	0.0686236	0	0.0524985	0	0.0177526	0	0.12336	0.000374573	0.263051	0.0117004	0	0	0	0.00384538	0	0.0224838	0	0.341285
GSM996421	0.00665881	0	0.0232466	0.0476679	0.0656761	0	0.0134789	0	0.0146319	0	0.1158	0	0.401921	0.0429773	0	0	0	0.00204109	0	0.00781394	0	0.258086
GSM996422	0	0.00113785	0	0.157985	0.0469879	0	0.00813095	0	0.0382682	0	0.0668918	0.0133064	0.258922	3.1466e-05	0	0	0	0.00400793	0	0.0135016	0	0.390829
GSM996423	0.00445318	0	0	0.160853	0.107334	0	0.040493	0	0	0	0.0578952	0.0339786	0.302954	0	0	0	0	0.0037885	0	0	0	0.288251
GSM996424	0.00996798	0	0	0.120092	0.107697	0	0	0	0.0213393	0	0.238913	0	0.354812	0	0	0	0	0.000903219	0	0.00586664	0	0.140409
GSM996425	0.000237573	0.00211982	0	0.172654	0.0988115	0	0.0480203	0	0.00896342	0	0.17849	0	0.220931	0.0253028	0	0.0137572	0	3.90808e-05	0	0.0119039	0	0.218769
GSM996426	0	0.00788839	0	0.0371046	0.104118	0	0.0151535	0	0.0106544	0	0.103229	0	0.226605	0.0479568	0	0	0	0.00050824	0	0.00558207	0	0.4412
GSM996427	0.00754789	0.00732973	0	0.180397	0.116273	0	0.0394223	0	0.013158	0	0.0996861	0	0.240847	0.0085821	0	0	0	0.000532884	0	0.00468964	0	0.281533
GSM996428	0.0049188	0	0.0303606	0.17997	0.163628	0	0.0274975	0	0	0	0.134084	0.000550911	0.241445	0.00166399	0	0	0	0.00118937	0.0010961	0	0	0.213596
GSM996429	0.0013278	0	0	0.0102819	0.0834864	0	0.0117027	0	0	0	0.0417525	0	0.226881	0.041081	0	0	0	0.00150828	0	0.00522835	0	0.57675
GSM996430	0.0332301	0	0	0.165212	0.105648	0.00899362	0.0722061	0	0	0	0.20689	0	0.223236	0	0	0	0	0.00214311	0	0	0	0.182442
GSM996431	0.00899391	0	0	0.184508	0.0898334	0	0.0375586	0	0.0259328	0	0.193372	0.00857579	0.290895	0	0	0	0	0.00143346	0	0	0	0.158898
GSM996433	0	0.00970598	0.0117351	0.0917618	0.083247	0	0.0211981	0	0	0	0.071954	0.0212287	0.206129	0.0164807	0	0	0	0.000378543	0	0.0533104	0	0.41287
GSM996434	0	0.0034873	0.00623842	0.0762297	0.047165	0	0.0110343	0	0.0123166	0	0.0545457	0.012718	0.358016	0.0494224	0	0	0	0.000194529	0	0.0331284	0	0.335504
GSM996436	0.0303377	0	0	0.13347	0.124934	0	0.0160343	0	0.0714466	0	0.118856	0	0.367749	0.0105867	0	0	0	0.0111129	0	0	0	0.115472
GSM996437	0.0171085	0	0	0.264082	0.0132571	0	0.0731458	0	0.0465467	0	0.14707	0.0112634	0.260886	0	0	0	0	0.00122821	0	0	0	0.165412
GSM996438	0	0.00426545	0.0020223	0	0.022613	0	0.00234024	0	0.0164852	0	0.0167006	0.00932715	0.316993	0.0877228	0	0	0	0	0	0.0645221	0	0.457008
GSM996440	0.00760215	0.00785785	0	0.215218	0.111223	0.0263935	0.0708516	0	0.00839967	0	0.154294	0	0.286412	0.00312363	0	0	0	0.000480169	0.000522776	0	0	0.107621
GSM996441	0	0.00592915	0.00144125	0.159968	0.090077	0	0.0107026	0	0.0304316	0	0.123158	0	0.409414	0	0	0	0	0.00394491	0	0.00652336	0.0105832	0.147828
GSM996442	0.0315405	0	0.00463468	0.157805	0.0875293	0.0348521	0.031493	0	0.0349438	0	0.152282	0.00187815	0.335352	0	0	0	0	0.00334421	0	0	0	0.124345
GSM996444	0.0138345	0	0	0.133937	0.136378	0	0	0	0.021413	0	0.116717	0.0258539	0.224689	0	0	0	0	0.004661	0	0	0.00552375	0.316994
GSM996445	0.0428383	0	0	0.175211	0.0393994	0	0.0777473	0	0.00762381	0	0.116689	0.0228193	0.141572	0.0266378	0	0.00162543	0	0.00214962	0.00421624	0	0	0.341471
GSM996446	0.00090467	0.0105035	0	0.180023	0.0646974	0	0.0544928	0	0.00741489	0	0.14982	0	0.231794	0	0	0	0	0.00481464	0	0.00236461	0	0.293171
GSM996447	0	0.0122743	0.00644728	0.0959642	0.123443	0	0.0371896	0	0	0	0.0604021	0	0.276644	0.0132454	0	0	0	0.000172579	0	0	0	0.374217
GSM996448	0.01846	0	0	0	0.0574764	0	0.011896	0	0.00287005	0	0.0464276	0	0.291217	0.063546	0	0	0	0.00329258	0.00333146	0	0	0.501483
GSM996450	0	0.0152228	0	0.183937	0.0901256	0.0209478	0.00952021	0	0	0	0.0988448	0	0.287704	0.015907	0	0	0	0.00301307	0.00293116	0	0	0.271846
GSM996451	0.00367297	0	0	0.0725128	0.0597095	0	0.0155244	0	0.00838593	0	0.0734322	0.0150652	0.276411	0.0386281	0	0	0	0	0.00388041	0	0	0.432777
GSM996452	0.0107621	0.00185051	0.0194977	0.224188	0.152291	0	0.00533996	0	0.0306601	0	0.0826366	0.0198233	0.232593	0.00612895	0	0	0	0.000129527	0.000338586	0	0	0.21376
GSM996453	0.012886	0	0.0049736	0.159106	0.0857497	0	0	0	0.0325242	0	0.0728304	0	0.188441	0.0240793	0	0	0	0.00632656	0	0.0169246	0	0.396159
GSM996454	0.00418986	0.00477833	0	0.170578	0.124207	0	0.0682084	0	0	0	0.14173	0	0.204234	0	0	0	0	0.00168334	0.000758456	0	0	0.279632
GSM996455	0	0.00228995	0	0.196941	0.00689995	0	0	0	0.0543945	0	0.24874	0.0234525	0.306443	0.00295045	0	0	0	0.000144141	0.0126614	0	0	0.145082
GSM996456	0.0344613	0	0	0.267169	0.0812661	0	0.0318813	0	0.0363529	0	0.135898	0.0146622	0.295336	0	0	0	0	0	0.00220343	0	0.00143236	0.0993375
GSM996457	0	0.0011923	0	0.147747	0.04111	0	0	0	0.0415493	0	0.101545	0.0160042	0.239548	0.0367069	0	0	0	0.00147157	0	0.0332299	0	0.339895
GSM996458	0	0.00974735	0	0.180125	0.0741907	0	0.05684	0	0.00564682	0	0.133659	0.0149075	0.210352	0.0256163	0	0.00517151	0	0	0.00534273	0	0	0.278402
GSM996459	0	0.0141377	0	0.169891	0.0664654	0	0.0328423	0	0.00508287	0	0.0772518	0.000850718	0.253242	0.0310764	0	0	0	0	0.0145239	0	0	0.334635
GSM996460	0	0	0	0.134378	0.114264	0.0435855	0.0226797	0	0.00129029	0	0.109055	0	0.235834	0.0182827	0	0	0	0.00274061	0	0.0229325	0	0.294958
GSM996461	0.0512282	0	0	0.256369	0.113158	0	0.00459555	0	0.0372984	0	0.115654	0	0.212905	0.00900305	0	0	0	0.000304199	0	0.00218233	0	0.197301
GSM996462	0	0.00395548	0	0.0684495	0.0444276	0	0.00265615	0	0.025548	0	0.107409	0	0.308821	0.053127	0	0	0	0.00307232	0	0.0367992	0	0.345735
GSM996463	0.00207171	0.00645531	0	0.258156	0.065529	0	0.053074	0	0.011144	0	0.13194	0	0.254303	0	0	0	0	0.00444841	0.00663415	0	0	0.206244
GSM996464	0.00954964	0	0	0.0399471	0.0774266	0	0.0144733	0	0.00243165	0	0.0506009	0.0130437	0.185875	0.0222881	0	0	0	0.00276551	0	0.031122	0	0.550476
GSM996467	0	0.0016009	0.00518691	0.0656166	0.0310566	0	0.0110656	0	0.0114949	0	0.0261148	0.0128717	0.353635	0.0226449	0	0	0	0.00220592	0	0.0396354	0	0.416871
GSM996468	0.0507387	0	0.00883548	0.31083	0.0688278	0	0.0891564	0	0.00375471	0	0.0950807	0.00349833	0.19732	0	0	0	0	0.00231723	0.00336211	0	0	0.166279
GSM996469	0	0.00587552	0	0.159057	0.0641243	0	0.0236853	0	0	0	0.129308	0.0038692	0.345053	0.00720461	0	0	0	0.0010009	0	0.0100913	0	0.250731
GSM996472	0.0230444	0	0.000123079	0.0891332	0.0834616	0	0.00465724	0	0.0213276	0	0.0410341	0.0160928	0.208881	0.0438307	0	0	0	0.00495206	0	0.0528872	0	0.410575
GSM996473	0.00143837	0	0	0.167688	0.0778465	0	0.00719217	0	0.0289672	0	0.124168	0	0.22652	0.00687758	0	0	0	0.0015344	0	0.0113529	0	0.346414
GSM996474	0.0286354	0	0	0.115945	0.0261628	0	0.0017801	0	0.0343012	0	0.0285018	0.0300558	0.227482	0.0746431	0	0	0	0	0	0.00335005	0	0.429143
GSM996475	0	0.00833953	0	0.113768	0.0359529	0	0.0090153	0	0.0110165	0	0.0379846	0.0110587	0.231816	0.0279909	0	0	0	0.00209072	0	0.032886	0	0.478081
GSM996476	0.0599293	0	0	0.0893637	0.0917882	0.00190813	0	0	0.0146384	0	0.0366361	0.010813	0.311027	0.00154691	0	0	0	0.00342623	0	0.00917289	0	0.36975
GSM996477	0.0254519	0	0	0.253035	0.0808655	0.0011132	0.0268077	0	0.0197245	0	0.207934	0	0.275539	0	0	0	0	0.00108195	0.00244776	0	0	0.105999
GSM996478	0	0.0119314	0	0.147358	0.0777452	0	0.0673371	0	0.0107577	0	0.133131	0	0.238316	0	0	0	0	0.00259342	0	0	0	0.310831
GSM996479	0.0490155	0	0	0.327499	0.0494166	0.0165415	0.0470917	0	0.0168526	0	0.115575	0	0.18544	0.0134035	0	0.00729462	0	0	0.00542077	0	0	0.16645
GSM996480	0	0.00865191	0	0.0508234	0.0574127	0.00467565	0.0375976	0	0.00175078	0	0.0895111	0	0.224551	0.060728	0	0	0	0.000854466	0	0.0320505	0	0.431393
GSM1050732	0.0191208	0.0192102	0.0161596	0.21571	0.099727	0	0.0307828	0	0.0219994	0	0.0559314	0.0387036	0.213146	0.0269514	0	0	0	0.0039078	0	0.00763204	0	0.231018
GSM1050734	0.0165362	0.00895685	0	0.289155	0.100134	0.0139491	0	0	0.0478318	0	0.0393539	0.0571542	0.233339	0	0	0.0149741	0	0.00114248	0.0137229	0	0	0.163751
GSM1050735	0	0.000188624	0	0.175062	0.0571007	0	0.0397715	0	0	0	0.0536726	0.023534	0.216741	0.028743	0	0.00419378	0	0	0.0112733	0	0	0.38972
GSM1050736	0.0107903	0.00020932	0	0.012241	0.099065	0.0134884	0.004037	0	0	0	0.0364298	0	0.242204	0.0718209	0	0	0	0.00218805	0	0.0440116	0	0.463515
GSM1050737	0.0127873	0.00470008	0.000292411	0.115038	0.0533537	0	0.0214844	0	0.0261138	0	0.100628	0.00148767	0.274142	0	0	0	0	0.0150032	0	0.0354661	0	0.339502
GSM1050738	0.0027992	0.00582514	0	0.13468	0.124861	0	0.0169541	0	0.0394688	0	0.0704733	0.0156189	0.220457	0.028472	0	0	0	0	0	0.0214126	0	0.318978
GSM1050739	0	0	0	0.0617194	0.0385422	0	0.048002	0	0	0	0.125241	0	0.335214	0.00895689	0	0	0	0.0016687	0.00244276	0	0	0.378213
GSM1050740	0	0.0214063	0.004009	0.089264	0.114874	0	0.0404987	0	0.00437885	0	0.13906	0	0.340082	0	0	0	0	0.00239168	0.00815109	0	0	0.235885
GSM1050865	0	0	0	0.460646	0.00967522	0	0.0403249	0	0.0134416	0	0.0573229	0.0964294	0.16538	0.0368767	0	0	0	0	0.00880933	0	0	0.111095
GSM1050866	0.0171148	0.00240539	0	0.0310709	0.103599	0.0424514	0.0104567	0	0.00684846	0	0.117079	0	0.318439	0	0	0	0	0.00502198	0	0.00330496	0	0.342208
GSM1050867	0.0289618	0	0	0.186045	0.0453203	0	0.0338729	0	0.0381629	0	0.0970469	0.00203756	0.287026	0.0412363	0	0	0	0	0.00780858	0	0.00548211	0.226999
GSM1050868	0.0390834	0	0	0.144588	0.0826133	0	0.106698	0	0	0	0.102756	0.0236418	0.202954	0	0	0.0317539	0.0014731	0.00989627	0	0.0472711	0	0.207271
GSM1050869	0.00238704	0.00205941	0.00101626	0.0511651	0.0268946	0	0.0149873	0	0.0118907	0.0050994	0	0.0326129	0.330415	0.168139	0	0	0	0	0.00778461	0	0	0.345549
GSM1050870	0.0322697	0.00570968	0	0.103048	0.0656688	0.0643003	0	0	0.023515	0	0.0847615	0.0350446	0.22259	0.0225334	0	0	0	0	0	0.00612215	0	0.334437
GSM1050871	0.00942105	0	0	0.101182	0.0603282	0	0.0189243	0	0.0115635	0	0.0588262	0	0.242625	0.0650871	0	0	0	0	0	0.00743329	0	0.42461
GSM1050872	0.0299307	0	0	0.231982	0.143575	0	0.00560776	0	0.0473034	0	0.0687556	0.0277088	0.186991	0	0	0.00402163	0	0.00374483	0	0	0	0.250379
GSM1050873	0	0.0147582	0	0.0277408	0.106858	0.0811561	0.0124724	0	0	0	0.0521963	0.0231732	0.20046	0	0	0	0	0.00240741	0	0	0	0.478777
GSM1050874	0	0.0257987	0	0.0547076	0.0998569	0	0.0338073	0	0	0	0.072541	0.0268421	0.378935	0.0529215	0.000823414	0	0	0.00942796	0	0.00235418	0	0.241985
GSM1050875	0.0332455	0	0.00448384	0.023118	0.0813245	0.00613751	0.0050417	0	0.0182881	0	0.0467679	0.00220414	0.338567	0	0	0	0	0.0117637	0	0	0	0.429058
GSM1050934	0	0.0054051	0	0.306298	0.128721	0	0.0082678	0	0.0133343	0	0.138657	0.0629251	0.25413	0	0	0.0308048	0	0.000958343	0	0	0	0.0504988
GSM1050942	0.0144502	0	0.0110176	0.301553	0.0107861	0	0.0670672	0	0	0	0	0.0838376	0.304353	0.0573462	0	0	0	0	0.0039364	0	0.00200258	0.14365
GSM1050943	0.0215993	0	0	0	0.113821	0	0	0	0.032636	0.00739056	0.0441255	0	0.30601	0.0262662	0	0	0	0.00990875	0	0.101827	0	0.336416
GSM1050948	0.045838	0	0	0.0831207	0.0823783	0.0467539	0.0251287	0	0.0153556	0	0.144662	0	0.1928	0.00479411	0	0.0146047	0	0.00349423	0.0194934	0	0	0.321576
GSM1050953	0.0167786	0.00206186	0.00497819	0.127925	0.166519	0	0	0	0.0473839	0	0.111911	0.00537225	0.324369	0.00677995	0	0	0	0.00633069	0	0.00300793	0	0.176583
GSM1050955	0	0.0036831	0	0.0400004	0.0255525	0	0.0370702	0	0.00118037	0	0.164856	0	0.191714	0.0252761	0	0.00266291	0	0	0.00551253	0	0	0.502492
GSM1050966	0.000924638	0.00701469	0	0.00515272	0.108569	0	0.00493695	0	0	0	0.0736013	0	0.356344	0.0683166	0	0	0	0.000445021	0	0.0255256	0	0.349169
GSM1050971	0.00100041	0.0205996	0	0.136187	0.13441	0	0.0127764	0	0.0131996	0	0.0787119	0	0.245807	0	0	0	0	0.00466079	0	0	0	0.352648
GSM1050979	0	0.0124895	0	0.0842808	0.144119	0	0.029756	0	0	0	0.0886117	0	0.208263	0.0211975	0	0	0	0.00516465	0.00588659	0	0	0.400232
GSM1050988	0.0044326	0	0	0.0845561	0.0928468	0	0.0747511	0	0	0	0.143347	0	0.219947	0	0	0	0	0.00330429	0	0.0109422	0	0.365873
GSM1050994	0	0.00292028	0	0.144895	0.0449458	0	0.0161347	0	0.0315178	0	0.0503189	0.024454	0.266794	0	0	0	0	0.00190318	0.00211011	0	0	0.414006
GSM1050996	0	0.012436	0.00101664	0.131777	0.0463334	0	0.058852	0	0	0	0.0274803	0.0435073	0.29364	0.0157328	0	0	0	0.0039707	0.0168638	0	0	0.34839
GSM1051001	0	0.0109102	0.00846698	0.118085	0.0691809	0	0.0181689	0	0.0180319	0	0.0512821	0.0282723	0.355553	0.0239126	0	0	0	0	0.0184056	0	0	0.27973
GSM1051002	0.0543634	0	0	0.170426	0.0664383	0	0.0254947	0	0.0320264	0	0.0314514	0.0472238	0.264171	0	0	0	0	0.0178239	0	0.00543317	0	0.285148
GSM1051008	0.039631	0	0	0.162641	0.102392	0	0	0	0.0342279	0	0.101379	0.0540738	0.106264	0.0221888	0	0.0174111	0	0	0	0.00564227	0	0.354149
GSM1051014	0.0093274	0	0.00664007	0.261474	0.0883983	0	0.00884794	0	0.0251616	0	0.0354572	0.0179157	0.18469	0.0110718	0	0.000138853	0	0.00371546	0	0.022972	0	0.32419
GSM1051040	0	0.00368686	0	0.102205	0.107345	0	0.0468169	0	0	0	0.0868563	0	0.126402	0	0	0.0207179	0	0.00110232	0	0	0.00151894	0.503349
GSM1051042	0	0.00389187	0	0.183802	0.0467663	0	0.0289759	0	0	0	0.12097	0.0194346	0.461392	0.0272107	0	0	0	0.00378884	0.000385488	0	0	0.103383
GSM1051045	0.0109087	0.00986879	0	0.0759308	0.132131	0	0.0504063	0	0.0527437	0	0.129745	0	0.426076	0.01344	0	0.00824435	0	0.00244938	0	0	0	0.0880561
GSM1051063	0.00933975	0	0	0.0779018	0.110584	0	0	0	0.0245701	0	0.0684842	0	0.167192	0	0	0	0	0.00343071	0	0	0	0.538498
GSM1051087	0	0	0	0	0.0729031	0	0.0320084	0	0.0125979	0.0215064	0.0577978	0	0.185592	0.0952089	0	0	0	0.00601123	0.00395551	0	0	0.512418
GSM1051088	0.0600939	0	0.00524541	0.126565	0.247536	0.0139435	0.0148055	0	0.0384912	0	0.0989748	0.00575854	0.237175	0.0099401	0	0.0108754	0	0.00297275	0.00768653	0	0	0.119936
GSM1051090	0	0.011292	0	0.23099	0.0754116	0	0.120658	0	0	0	0.113461	0.0200854	0.271248	0.0165612	0	0	0	0	0.00365033	0	0	0.136643
GSM1051098	0.0409285	0	0	0.20125	0.133266	0	0.0490261	0	0.04884	0	0.150389	0	0.273557	0.0188413	0	0	0	0.0104932	0	0.0175817	0	0.055827
GSM1051099	0	0.00808005	0	0.0206516	0.107113	0.017484	0.00470711	0	0	0	0.0532498	0	0.204551	0	0	0	0	0.0100716	0	0.0103521	0	0.56374
GSM1051114	0.00365906	0	0	0.105693	0.0563846	0	0	0	0.0240368	0	0.0371373	0.0307918	0.193914	0.0241829	0	0	0	0.00141743	0	0.0175782	0	0.505204
GSM1704154	0.0194747	0.010368	0.000129657	0.309703	0.057471	0	0.0124136	0	0.0532831	0	0.0330245	0.0906094	0.328242	0	0	0	0	0.000903137	0.00303602	0	0	0.0813425
GSM1704155	0.0174484	0	0.00329585	0.246598	0.02408	0	0.0596942	0	0.0363794	0	0.012703	0.0926299	0.264964	0.0095072	0	0	0	0.00485631	0.0213038	0	0.00351764	0.203022
GSM1704156	0	0.00607093	0	0.0155243	0.0538973	0	0	0	0.0216989	0	0.01405	0.018345	0.233829	0.0282459	0	0	0	0.00193228	0	0.0770005	0	0.529406
GSM1704157	0.0124034	0.00121011	0	0.18852	0.0145436	0	0.0524675	0	0.00483577	0	0.0703041	0.0501873	0.301268	0	0	0	0	0.00275359	0.0113594	0	0	0.290148
GSM1704158	0.0102412	0.004024	0	0.174089	0.0191896	0	0.0707671	0	0.0176076	0	0.0289184	0.0395684	0.267923	0.000575675	0	0.00349323	0	0.00107904	0	0.00172638	0	0.360798
GSM1704159	0	0.0349646	0	0.0758981	0.0463326	0	0	0	0.0563712	0	0.0358527	0.023615	0.328925	0.0169229	0	0	0	0.0098366	0	0	0	0.371281
GSM1704160	0	0.0298842	0	0.196011	0.0772503	0	0	0	0.0699493	0	0	0.070822	0.170713	0.00318834	0	0	0	0.00322066	0	0.0220451	0	0.356917
GSM1704161	0.0430816	0	0	0.0358149	0.0712675	0	0	0	0.0468113	0	0.0567027	0	0.141151	0.0559365	0	0.0202702	0	0	0	0.0458375	0	0.483127
GSM1704162	0.0152577	0.00465399	0.00779854	0.301639	0.0160706	0	0.011153	0	0.0188071	0	0.0636707	0.0832282	0.278892	0.0138925	0	0	0	0	0	0	0.0272899	0.157647
GSM1704163	0	0.0513359	0.0477902	0.368715	0	0	0.0629076	0.00222729	0.0241056	0	0	0.0950821	0.10616	0.042172	0	0	0	0	0.00262382	0	0	0.19688
GSM1704164	0.0197424	0	0	0.177275	0.0855478	0.000196715	0.00958522	0	0.0202734	0	0.0315538	0.0635087	0.253819	0.0142852	0	0	0	0	0.0106662	0	0	0.313547
GSM1704165	0.0346565	0	0	0.240838	0.0866511	0.00714258	0.049175	0	0.0453991	0	0.0988423	0.0549955	0.26972	0.00777723	0	0	0	0.0049416	0.00051544	0	0	0.0993452
GSM1704166	0.00286888	0	0	0.139013	0.0640985	0.0260932	0	0	0.0339696	0	0.0496396	0.046221	0.187791	0.0461142	0	0.020248	0	0	0.00608577	0	0	0.377857
GSM1704167	0	0.0118748	0	0.0806403	0.0870228	0.056145	0	0	0.0258383	0	0.0150261	0.0386455	0.186954	0	0	0	0	0.00909793	0	0.0273567	0	0.461399
GSM1704168	0	0.00467704	0.00404406	0.17512	0.0496735	0.0177752	0	0	0.0288142	0	0.0881987	0.072552	0.210107	0	0	0	0	0.0035175	0	0.00552367	0	0.339997
GSM2203648	0.0235192	0.00265413	0	0.203216	0.179807	0	0.0256614	0	0.0518212	0	0.101704	0.0388461	0.216763	0	0	0.0325341	0	0.00451894	0	0.00527653	0	0.113678
GSM2203649	0	0.00935926	0	0.352629	0.0690508	0	0.042814	0	0.00534351	0	0.103145	0.043281	0.24563	0	0	0.0169573	0	0.00115673	0.00103926	0	0	0.109594
GSM2203650	0	0.010504	0	0.040418	0.0305527	0	0.0272781	0	0.0155337	0	0.0757961	0.00906269	0.277435	0.0323696	0	0	0	0.000394577	0.0136138	0	0	0.467042
GSM2203651	0	0.00401549	0	0.0987968	0.069381	0	0.00916825	0	0	0	0.0558814	0.0168961	0.214487	0	0	0	0	0.00217939	0	0.00347066	0	0.525724
GSM2203652	0.00285261	0	0.00868387	0.167565	0.0831838	0	0.0530584	0	0.0092869	0	0.0599533	0.0122922	0.25561	0	0	0.0116575	0	0.00424517	0	0	0	0.331612
GSM2203653	0.00167489	0	0	0.157157	0.0754411	0	0.000650596	0	0.0376472	0	0.035803	0.0308594	0.384291	0	0	0	0	0.0048109	0	0.0243602	0	0.247304
GSM2203654	0.0362506	0.00828608	0.00578153	0.104481	0.0905653	0.0270877	0.0338769	0	0.00767302	0	0.019425	0.0402662	0.280713	0.0111617	0	0	0	0.0060005	0	0.0104832	0	0.317948
GSM2203655	0	0.00508952	0	0.113994	0.0352236	0	0	0	0.0557371	0	0.0244515	0.0455482	0.293837	0.049855	0	0	0	0	0	0.0435056	0	0.332758
GSM2203656	0.0265045	0	0.00585571	0.126126	0.0324886	0	0.0250806	0	0	0	0.0178299	0.0545793	0.254766	0	0	0	0	0.00568374	0	0.022	0	0.429086
GSM2203657	0.036005	0	0	0.350257	0	0	0	0	0.0825212	0	0.0683511	0.111898	0.155775	0.0220442	0	0	0	0	0	0.00310596	0	0.170042
GSM2203658	0	0.0194267	0	0.0431115	0.0719972	0	0	0	0.0507281	0	0.0805556	0.00188326	0.254943	0.0528022	0	0	0	0.000350559	0	0.0298359	0	0.394366
GSM2203659	0.00397963	0.0168189	0.00454711	0.162786	0.121815	0.0208328	0	0	0.0365193	0	0.0163755	0.0595651	0.284252	0.010371	0	0	0	0.00253455	0	0.00728355	0	0.252319
GSM2203660	0	0.0130217	0	0.0271382	0.0771064	0	0	0	0.0423859	0	0.0398491	0.0229845	0.188612	0.0739305	0	0	0	0	0	0.029109	0	0.485863
GSM2203661	0	0.0145816	0	0.270657	0.0796898	0.00853182	0	0	0.0408821	0	0	0.0890106	0.27262	0	0	0.020299	0	0.00120015	0.00322784	0	0	0.1993
GSM2203662	0.0232826	0	0	0.201115	0.099821	0	0	0	0.0522362	0	0.0719171	0.015877	0.134192	0	0	0	0	0.00829078	0	0.00261368	0	0.390655
GSM2203663	0.0139677	0	0.00736015	0.171425	0.0884599	0	0.0766606	0	0.00653416	0	0.107639	0.0716517	0.227748	0.00395368	0	2.29663e-05	0	0.00458884	0.00158207	0	0	0.218406
GSM2203664	0.026938	0.00898168	0	0.0572217	0.0980386	0.035972	0.0140622	0	0.0373155	0	0.0838258	0.0114408	0.223833	0.0324093	0	0	0	0	0.0117873	0	0	0.358174
GSM2203665	0	0.00862906	0	0.0980404	0.0664624	0.0023802	0.0108364	0	0.0225309	0	0.0238237	0.0102009	0.245233	0.0305242	0	0	0	0.0021836	0.0123116	0	0	0.466844
GSM2203666	0	0.000867179	0	0.122785	0.0103133	0	0.0341331	0	0	0	0.0259446	0.0287977	0.315017	0.0169062	0	0	0	0.000469861	0	0.00558793	0	0.439179
GSM2203667	0	0.00461402	0	0.0325699	0.0431997	0	0.0166836	0	0.00991763	0	0.0629979	0.0192226	0.292292	0.0737357	0	0	0	0	0.014252	0	0	0.430515
GSM2203668	0.003644	0.0177747	0.00722195	0.215094	0.050639	0.00469167	0	0	0.0282928	0	0.0293922	0.0282337	0.231929	0.026839	0	0.00521696	0	0.00186571	0	0.019893	0	0.329273
GSM2203669	0.0410291	0	0.00576737	0.219199	0.069229	0	0.0560017	0	0.0360563	0	0.0719939	0.0592178	0.167911	0.0108574	0	0	0	0.00208798	0.0299228	0	0	0.230726
GSM2203670	0.013214	0	0.00196952	0.218277	0.088891	0	0.0280228	0	0.0448274	0	0.0103286	0.0635581	0.279271	0.0358684	0	0	0	0.00120824	0	0.00411516	0	0.210449
GSM2203671	0.00403333	0.0139365	0	0.242194	0.0473873	0.016752	0.0350436	0	0.0468413	0	0.099702	0.0683531	0.208212	0	0	0	0	0.00384257	0.0168571	0	0	0.196845
GSM2203672	0.00512617	0.00163767	0.0102505	0.032082	0.04663	0	0	0	0.0455258	0	0.0196042	0.0252847	0.391918	0.0644627	0	0	0	0.00204602	0	0.048977	0	0.306455
GSM2203673	0.00613458	0.0251611	0.0238081	0.143338	0.08009	0	0.0253264	0	0.00631792	0	0.0356135	0.0274873	0.243511	0	0	0	0	0.0110471	0.00894404	0	0	0.36322
GSM2203674	0.0192758	0	0	0.248899	0.021184	0	0	0	0.0313841	0	0.0568421	0.0766557	0.261657	0.00796134	0	0	0	0	0	0	0	0.276141
GSM2203675	0.00342489	0.00189502	0	0.141868	0.0761055	0	0.0208011	0	0.0138264	0	0.0999509	0.00035851	0.353798	0	0	0	0	0.00383792	0.00281193	0	0	0.281322
GSM2203676	0.0018538	0.0196797	0	0.115435	0.131796	0	0.0341084	0	0.0467497	0	0.0855159	0.0203024	0.260132	0.0181004	0	0	0	0.0104679	0.00610491	0	0	0.249755
GSM2203677	0.0106105	0	0	0.162433	0.103301	0	0.0335578	0	0	0	0.0690918	0.0362524	0.235282	0	0	0.000383664	0	0.00510519	0	0	0	0.343982
GSM2203678	0	0.00500944	0.00250146	0.103868	0.0208523	0	0.0238633	0	0	0	0.0393028	0.0178961	0.294118	0.0395412	0	0	0	0	0.00602483	0	0	0.447023
GSM2203679	0.0268534	0	0	0.0327466	0.055605	0.0377478	0	0	0.0269919	0	0.0156598	0.0152706	0.271338	0.0385155	0	0	0	0.000976106	0	0.0380639	0	0.440231
GSM2203680	0	0.00790364	0	0.112312	0.0554017	0	0.0726821	0	0	0	0.0712026	0.00910465	0.246699	0	0	0	0	0.00343275	0	0.0167639	0	0.404497
GSM2203681	0.00131493	0	0	0.10747	0.074005	0	0.0329591	0	0	0	0.0507212	0.0106263	0.219998	0.015859	0	0	0	0.000823017	0.00742982	0	0	0.478793
GSM2203682	0.0499485	0	0.0121797	0.22211	0.0192308	0	0.00406037	0	0.0295883	0	0	0.0849981	0.221386	0.0278601	0	0	0	0.00305319	0	0.00059115	0	0.324994
GSM2203683	0.0134618	0	0.0163924	0.200403	0.062285	0	0.0598381	0	0.0168109	0	0.0678561	0.0593954	0.246716	0	0	0.0251475	0	0.00413676	0	0	0	0.227557
GSM2203684	0.0303634	0	0.00402237	0.142879	0.0919083	0	0	0	0.0528718	0	0.0630559	0.049765	0.101842	0.0425551	0	0.0150458	0	0	0	0.0341573	0	0.371534
GSM2203685	0	0	0	0.122052	0.167601	0	0.00415436	0	0.0456116	0	0.0587215	0.0543662	0.295124	0.0180128	0	0	0	0.0132028	0	0	0.0134317	0.207722
GSM2203686	0.00782729	0	0	0.269505	0.0536699	0	0.0270558	0	0.0175659	0	0.1708	0.0664547	0.21285	0	0	0.0224346	0	0	0.00656467	0	0	0.145272
GSM2203687	0.0158853	0.00346914	0	0.207617	0.0494247	0	0.0419349	0	0.0311583	0	0.0667929	0.0488522	0.243042	0.00405039	0	0	0	0.000462295	0	0	0	0.287311
GSM2203688	0.000486503	0.0429625	0	0.185022	0.162661	0.024692	0.00330321	0	0.0390923	0	0.0463629	0.0733587	0.204378	0	0	0	0	0.00680037	0	0.00365348	0	0.207226
GSM2203689	0	0.00977142	0	0.134737	0.0992676	0	0.0399434	0	0	0	0.0631599	0.008013	0.153717	0.0109043	0	0	0	0.000808782	0.00695519	0	0	0.472722
GSM2203690	0.0340898	0	0	0.0284821	0.118654	0.0354802	0.0074541	0	0.0209452	0	0.0534632	0	0.317884	0	0	0	0	0.0096424	0	0.00606089	0	0.367843
GSM2203691	0	0.0128111	0	0.144278	0.0644734	0	0.0428499	0	0.00488028	0	0.168395	0.0330382	0.174164	0.0180726	0	0	0	0	0.0085435	0	0	0.328494
GSM2203692	0.0123981	0	0.00484604	0.21293	0.0126965	0	0	0	0.0681051	0	0.050723	0.0401059	0.249155	0.034327	0	0	0	0	0.00915699	0	0	0.305556
GSM627652_ch1	0	0.0713391	0	0.146883	0.0540379	0	0	0	0.136745	0	0	0.0807288	0.253759	0	0	0	0	0.0082708	0	0.0495685	0	0.198668
GSM627653_ch1	0	0.0339202	0	0.128201	0	0.00263802	0	0	0.0918085	0	0	0.0872518	0.19405	0.00823631	0	0.000242171	0	0	0.000925351	0.007557	0	0.445169
GSM627654_ch1	0	0.0649579	0	0.166992	0	0	0	0	0.121918	0	0.0267044	0.0812309	0.348567	0.0265893	0	0	0	0	0	0.0126291	0	0.150412
GSM627655_ch1	0	0.0646853	0	0.128429	0.108267	0.00281704	0	0	0.0766562	0	0.0207982	0.0681151	0.334633	0	0	0	0	0	0	0.0180463	0	0.177553
GSM627656_ch1	0.0108652	0	0	0.0849816	0.121856	0	0	0	0.0413686	0	0.00396385	0.059186	0.2531	0.0395791	5.14224e-05	0	0	0	0	0.0124742	0	0.372573
GSM627657_ch1	0	0.0480235	0	0.178819	0.00036721	0	0	0	0.0770248	0	0	0.0993836	0.309057	0.0157304	0.00349914	0	0	0	0.0244559	0	0	0.243639
GSM627658_ch1	0	0.0675663	0	0.201289	0	0	0	0	0.109362	0	0	0.139581	0.253148	0	0	0	0	0	0.0366336	0	0	0.19242
GSM627659_ch1	0	0.028391	0	0.316269	0.0739451	0	0	0	0.0621275	0	0	0.153219	0.190024	0.00587722	0	0	0	0.00352973	0.00687213	0	0	0.159745
GSM627660_ch1	0	0.0646208	0	0.171846	0.101868	0	0.00121901	0	0.0631258	0	0.0199269	0.0778461	0.268728	0	0	0	0	0.00922142	0.00185172	0	0	0.219747
GSM627661_ch1	0	0.0246093	0	0.0385814	0.0741349	0.0212569	0	0	0.0690811	0	0.0276898	0.069297	0.287431	0.0829949	0	0	0	0	0	0.0279181	0	0.277005
GSM627662_ch1	0	0.0625748	0	0.0386599	0.0861499	0	0	0	0.0755173	0	0	0.0656256	0.194292	0.0144996	0.00115731	0	0	0	0	0.0129913	0	0.448533
GSM627663_ch1	0.0290993	0	0	0.0969986	0.0705689	0	0.0172786	0	0.052546	0	0.00558038	0.0341097	0.190442	0.0418294	0	0	0	0.0117621	0	0.0288984	0	0.420887
GSM627664_ch1	0	0.0685633	0.0152378	0.0461896	0.065794	0.0137186	0	0	0.0846155	0	0	0.10296	0.309752	0.0243042	0	0	0	0	0.0228336	0	0	0.246031
GSM627665_ch1	0	0.0667214	0	0.0508659	0.117506	0.0949776	0	0	0.0657448	0	0.00390191	0.0671478	0.270564	0.00577566	0	0	0	0	0.00900145	0	0	0.247794
GSM627666_ch1	0	0.0200151	0	0.144863	0.109989	0	0	0	0.073276	0	0	0.089915	0.256093	0.0394839	0	0	0	0.00353917	0	0.0109129	0	0.251913
GSM627667_ch1	0	0.068859	0	0.0632888	0.0502151	0.065874	0	0	0.099004	0	0	0.0746116	0.227799	0.0258472	0	0	0	0.00680872	0	0.094275	0	0.223418
GSM627668_ch1	0	0.0136071	0	0.187217	0.0104087	0	0	0	0.0651865	0	0	0.10042	0.200387	0	0	0	0.000115596	0.0112722	0	0.0202801	0	0.391106
GSM627669_ch1	0	0.0589034	0	0.27418	0.00411469	0	0.0298294	0	0.0448927	0	0.0274538	0.099293	0.135425	0	0	0	0.0032166	0	0.0110995	0	0	0.311592
GSM627670_ch1	0.0115152	0	0	0.0450961	0.151222	0	0	0	0.0724119	0	0.0282873	0.0523739	0.218164	0.0272104	0	0	0	0.0114993	0	0.021802	0	0.360418
GSM627690_ch1	0	0.0117305	0	0.0122216	0.135483	0	0.00333056	0	0.0446584	0	0	0.0549195	0.27683	0.0388325	0	0	0	0.00280006	0	0.021047	0	0.398147
GSM627691_ch1	0	0.0615234	0	0.221212	0.0975481	0	0	0	0.0684169	0	0.0555422	0.0585008	0.212825	0.00746455	0	0	0	0.0108903	0	0.0188454	0	0.187232
GSM627692_ch1	0	0.0379644	0	0.130643	0.098274	0	0.00630086	0	0.0548791	0	0	0.067688	0.254745	0	0	0	0	0.01247	0.00199169	0.00697763	0	0.328066
GSM627693_ch1	0.00766305	0.0129123	0	0.0788769	0.10694	0	0	0	0.0775969	0	0.0361156	0.0520802	0.300407	0.016686	0	0	0	0.0111706	0.000642924	0.00864265	0	0.290266
GSM627671_ch2	0.0133045	0.0154649	0	0.101298	0.0705115	0.00743014	0	0	0.119847	0	0.0025247	0.0825534	0.193585	0	0	0	0	0.0118813	0.00628345	0	0	0.375317
GSM627672_ch2	0	0.0538436	0	0.0565645	0.040864	0	0	0	0.124564	0	0	0.0680541	0.422231	0.0100115	0	0	0	0	0	0.0134469	0	0.21042
GSM627673_ch2	0.0080577	0.00487367	0.00393182	0.22634	0.030348	0	0	0	0.120572	0	0.00385678	0.0975577	0.231799	0	0	0.0048037	0	0	0	0.000952861	0	0.266907
GSM627674_ch2	0	0.0669159	0	0.307456	0.00993853	0	0	0	0.153513	0	0	0.158194	0.142731	0	0	0.0261156	0	0	0.00788172	0	0.0196478	0.107607
GSM627675_ch2	0	0.0601341	0	0.0705633	0.120287	0	0	0	0.0364357	0	0	0.0840675	0.368588	0.00373418	0	0	0	0	0	0	0	0.25619
GSM627676_ch2	0	0.0595827	0	0.13043	0.157315	0	0	0	0.068331	0	0.0284316	0.0900447	0.199876	0.0546138	0	0	0	0.00780265	0	0.0053414	0	0.19823
GSM627677_ch2	0	0.0240633	0	0.0757562	0.137541	0.0251277	0	0	0.0550807	0	0	0.142821	0.212387	0.0447462	0	0	0	0	0.00132331	0	0	0.281154
GSM627678_ch2	0.0329311	0	0	0.184462	0.0521026	0.0264064	0	0	0.0910919	0	0	0.0790291	0.280763	0.00691961	0	0	0	0.000608793	0.0109841	0	0	0.234701
GSM627679_ch2	0	0.0580842	0	0.0848493	0.0624961	0.027733	0	0	0.075584	0	0.0410979	0.0959279	0.290201	0	0	0	0	0.00827522	0.00477961	0.00142285	0	0.249548
GSM627680_ch2	0	0.0335313	0	0.12771	0.0524708	0.00796741	0	0	0.123405	0	0.0272784	0.10442	0.194762	0	0	0	0	0	0.00717691	0	0	0.321278
GSM627681_ch2	0	0.0792677	0	0.161134	0.0479138	0.0198042	0	0	0.0948633	0	0.031124	0.110522	0.321783	0.0173747	0	0	0	0	0	0.00580432	0	0.110409
GSM627682_ch2	0	0.0373429	0	0.0965215	0	0.072011	0	0	0.0879077	0	0	0.0978941	0.323601	0.0500625	0	0	0	0.00707525	0	0.0197214	0	0.207862
GSM627683_ch2	0	0.0474125	0	0.382268	0.0712261	0	0	0	0.0709188	0	0.0164729	0.100195	0.163112	0	0	0.0109982	0	0	0	0	0	0.137397
GSM627684_ch2	0	0.0668954	0	0.112413	0	0.0571741	0.0417557	0	0.0375636	0	0.000442925	0.158188	0.259298	0	0	0.00657254	0	0	0.0038457	0	0	0.255851
GSM627685_ch2	0	0.0459343	0	0.2051	0.0602789	0	0	0	0.102256	0	0.0211912	0.0651183	0.192398	0.03965	0	0	0	0	0	0.0304481	0	0.237625
GSM627686_ch2	0	0.0281147	0	0.0737886	0.0452473	0	0	0	0.0916903	0	0	0.0583816	0.248045	0.000901039	0	0	0	0.00577427	0	0.0568888	0	0.391169
GSM627687_ch2	0.00284628	0.0116583	0	0.0767688	0.0969563	0.0113423	0	0	0.0555262	0	0.0303683	0.0394063	0.339798	0.0228286	0	0	0	0.000107799	0	0.0248153	0	0.287577
GSM627688_ch2	0	0.0352582	0	0.0781646	0.143759	0.00199556	0	0	0.0654364	0	0.0356483	0.0265231	0.186584	0.0325266	0	0	0	0.00980957	0	0.00427461	0	0.38002
GSM627689_ch2	0.0178933	0	0	0.08216	0.0736245	0	0.0307711	0	0.0189277	0.0104263	0	0.0388094	0.228159	0.0489329	0	0	0	0	0	0.0222342	0	0.428061
GSM627694_ch2	0	0.046197	0	0.182735	0.11928	0	0	0	0.0607728	0	0.0410124	0.0550151	0.206737	0.0182023	0	0	0	0.00747079	0	0	0.00385118	0.258727
GSM627695_ch2	0	0.0424476	0	0.190967	0.0877388	0	0	0	0.0857498	0	0.0239756	0.0911986	0.259029	0.00730836	0	0	0	0	0.00113018	0	0.00281758	0.207637
GSM709417	0.00924024	0	0	0.0164739	0.19933	0	0	0	0.03615	0.00187637	0	0.0524603	0.178277	0	0	0	0	0.0151329	0	0.0260238	0	0.465035
GSM709421	0	0.0659619	0	0.106206	0.00206734	0.0735116	0	0	0.096438	0	0	0.131472	0.331674	0.0177821	0	0	0	0.00913997	0	0.0089307	0	0.156816
GSM709422	0	0.0566068	0	0.188562	0.0237552	0	0	0	0.0549777	0	0	0.116834	0.274961	0.00661103	0	0.0299801	0	0.0103747	0	0.0134348	0	0.223902
GSM709424	0	0.0423857	0	0.0849111	0.0626589	0	0	0	0.0761469	0	0.00650962	0.0611088	0.272199	0.0564509	0	0	0	0	0	0.0458218	0	0.291807
GSM709426	0	0.072083	0	0.230339	0.135186	0	0	0	0.103459	0	0.00766651	0.07135	0.16125	0	0	0	0	0.00817551	0	0	0	0.21049
GSM709427	0	0.064877	0	0.170889	0.13398	0	0.07284	0	0.0106392	0	0.0146584	0.0445079	0.123849	0	0	0.0177779	0.000601592	0.0125441	0	0.0244926	0	0.308344
GSM709431	0	0.0309626	0	0.175055	0.0367239	0	0	0	0.0463331	0	0.0529628	0.119001	0.271797	0.0270008	0	0	0	0	0	0.0214943	0	0.21867
GSM709434	0	0.0636262	0	0.113472	0.0845164	0.00820232	0	0	0.100064	0	0	0.0811401	0.226605	0.0192021	0	0	0	0.0109324	0	0	0	0.29224
GSM709436	0	0.0820388	0	0.305484	0.0612736	0	0	0	0.0999876	0	0.00449889	0.0726824	0.263968	0	0	0	0	0.0106416	0.00681474	0	0	0.0926103
GSM709439	0	0.101731	0	0.12058	0.135027	0.0230507	0	0	0.115471	0	0.00238291	0.07146	0.111187	0.0103732	0	0.0537306	0	0	0.0159639	0	0	0.239043
GSM709447	0	0.0651094	0	0.122116	0.0907712	0	0	0	0.0694753	0	0	0.10304	0.17515	0	0	0.0403904	0	0.0148452	0	0.032885	0	0.286217
GSM709449	0	0.0226711	0	0.307574	0.0847988	0.00932726	0	0	0.0516927	0	0	0.127762	0.221533	0.00152809	0	0	0	0.00810638	0	0.00806889	0	0.156938
GSM709450	0	0.0686775	0	0.0722611	0.0976045	0	0	0	0.0887878	0	0	0.0862206	0.253947	0.0377814	0	0	0	0.00670288	0	0	0	0.288017
GSM709452	0	0.0814461	0	0.0176819	0.126026	0.0226336	0	0	0.0857011	0	0	0.102707	0.163341	0.0282001	0	0.0266986	0	0.00015311	0	0.011287	0	0.334124
GSM709454	0	0.0717726	0	0.251814	0.0392691	0	0	0	0.115807	0	0	0.138338	0.132209	0	0	0	0	0.00834811	0	0.0207867	0	0.221656
GSM709455	0	0.00837344	0	0.00369645	0.134392	0	0	0	0.0541034	0	0.0150672	0.0402151	0.240573	0	0	0	0	0.0136145	0	0.0154493	0	0.474515
GSM709458	0.00167518	0.0248421	0	0.080494	0.042705	0	0	0	0.0913418	0	0	0.0839069	0.311173	0.0154935	0	0	0	0.00424681	0	0.0147878	0	0.329334
GSM709459	0	0.0612526	0	0.154121	0	0.0491549	0	0	0.11449	0	0	0.135525	0.166253	0	0	0.0604676	0	0	0.0132949	0	0	0.245441
GSM709461	0	0.0706358	0	0.0304332	0.095277	0.0247565	0	0	0.0413995	0	0	0.110729	0.238302	0	0	0.0429134	0	0.0161209	0	0.00913085	0	0.320301
GSM709464	0	0.0399565	0	0.0159848	0.05875	0.0199913	0	0	0.0821471	0	0.00887872	0.090059	0.312621	0.0516871	0	0	0	0	0.00165118	0.00464474	0	0.313628
GSM709466	0	0.0869212	0	0.122253	0.101549	0	0	0	0.0988418	0	0.00373123	0.122143	0.178402	0.0124873	0	0	0	0.0105671	0.00748875	0.000975198	0	0.254642
GSM709467	0	0.0454569	0	0.312972	0.00594529	0	0	0	0.127327	0	0.0438625	0.141315	0.267474	0	0	0.0152419	0	0	0	0	0	0.0404049
GSM709469	0	0.0572872	0	0.08132	0.0401747	0.0210576	0	0	0.104605	0	0	0.0967971	0.263239	0.0240481	0	0	0	0	0.0136264	0	0	0.297846
GSM709470	0	0.0667755	0	0.14921	0.066386	0	0	0	0.103272	0	0.0317529	0.0943188	0.304589	0.0193529	0	0	0	0	0	0	0.0107488	0.153594
GSM709471	0	0.0527129	0	0.1105	0.122934	0	0	0	0.0642343	0	0.0419908	0.0690403	0.236561	0.0235058	0	0	0	0.00456554	0	0	0	0.273955
GSM709472	0.00600206	0.036541	0	0.126104	0.146776	0	0	0	0.108793	0	0.0566909	0.064049	0.319859	0.0184583	0	0	0	0.0110664	0.0028723	0	0	0.102788
GSM709473	0	0.0499957	0	0.171437	0.0470658	0	0	0	0.0858819	0	0.0201753	0.0803253	0.34835	0.0136004	0.00247005	0	0	0	0	0.0221937	0.00147121	0.157034
GSM709474	0	0.0480512	0	0.180628	0.0412973	0	0	0	0.129963	0	0.0398067	0.0824231	0.263282	0.0226681	0	0	0	0	0.0015503	0	0	0.190329
GSM709475	0	0.0543512	0	0.0140485	0.0599216	0.0294523	0	0	0.0899727	0	0	0.0617338	0.327458	0.0310305	0	0	0	0.00176233	0	0.0110352	0	0.319234
GSM709479	0	0.0601477	0	0.0646513	0.140647	0	0	0	0.0920364	0	0.0429912	0.0388843	0.273245	0.0244241	0	0	0	0.00983068	0	0.0191288	0	0.234013
GSM709482	0	0	0	0.0481568	0.0452097	0	0	0	0.0504868	0	0	0.152566	0.244624	0.0621425	0	0	0	0.00834919	0	0.0645807	0	0.323884
GSM709483	0	0.0326061	0	0.28528	0.0560145	0	0	0	0.0870394	0	0.0158966	0.106499	0.244214	0.00922797	0	0	0	0.00894833	0	0.00558282	0	0.148691
GSM709485	0	0.0497286	0	0.137593	0	0	0	0	0.0886469	0	0	0.0840181	0.360023	0.0292607	0	0	0	0.00127945	0.00918113	0	0	0.240269
GSM709487	0	0.0618077	0	0.0950758	0.0950612	0	0	0	0.0982161	0	0.0192363	0.0641793	0.320446	0.0448946	0.00335723	0	0	0	0	0.0147174	0	0.183008
GSM709488	0	0.0668837	0.00311986	0.250501	0	0	0	0	0.113349	0	0	0.140989	0.234405	0.0306011	0	0	0	0.0082884	0.00596873	0	0	0.145894
GSM709489	0	0.0652519	0	0.290484	0.0732161	0	0	0	0.093038	0	0.0251117	0.198903	0.160649	0.00825514	0	0	0	0.00513591	0	0	0	0.0799553
GSM709490	0	0.021393	0.0035699	0.124763	0.0767017	0	0	0	0.0904164	0	0.0146108	0.0723509	0.20446	0.02947	0	0	0	0	0	0.0152076	0	0.347057
GSM709501	0	0.0260483	0	0.172697	0.0531374	0	0	0	0.0909149	0	0.0280195	0.0500588	0.192759	0.0420357	0.00186238	0	0	0	0	0.0125226	0	0.329944
GSM709502	0	0.0355806	0	0.0439887	0.107458	0.00186674	0	0	0.0799801	0	0	0.0674392	0.294515	0.0218927	0	0	0	0.0099848	0	0.0233169	0	0.313977
GSM709503	0	0.0561418	0	0.142445	0.0533942	0	0.0718974	0	0.0584711	0	0.0332541	0.0764917	0.170082	0.000552754	0	0	0.00043804	0	0	0.0103115	0	0.326521
GSM709504	0	0.0309954	0	0.0617047	0.0903547	0	0.00471324	0	0.0723149	0	0.0031412	0.0485384	0.274631	0.00185533	0	0	0	0.00790602	0	0	0	0.403846
GSM709505	0	0.0343385	0	0.0661524	0.139568	0	0	0	0.0337219	0	0	0.0587519	0.247797	0.0487635	0	0	0	0.0104109	0	0.0199746	0	0.340522
GSM709506	0.00262666	0.00345734	0	0.186254	0	0	0	0	0.055124	0	0	0.0817132	0.161518	0.0402587	0	0.00200641	0	0	0.000983892	0.0039245	0	0.462133
GSM709507	0.0166423	0	0	0	0.118767	0	0	0	0.0798813	0	0	0.0677339	0.239678	0.0506021	0	0	0	0.00735171	0	0.0266709	0	0.392673
GSM709508	0	0.0664953	0	0.178056	0.0646436	0	0.0212039	0	0.0461829	0	0.0189674	0.057216	0.283894	0	0	0	0	0.0120348	0	0.0215732	0	0.229732
GSM709510	0	0.0580987	0	0.150013	0.0739531	0.0538596	0	0	0.11394	0	0.0345146	0.0789576	0.25688	0.0229726	0.00258267	0	0	0	0	0	0	0.154228
GSM1520380	0	0.078627	0	0.14453	0.132371	0	0	0	0.0969225	0	0.0237642	0.075147	0.298894	0.0191511	0	0	0	0.00102441	0	0	0	0.129569
GSM1520381	0	0.0591963	0	0.0564635	0.110552	0	0	0	0.0394075	0	0	0.0691928	0.323754	0	0	0	0	0.0129908	0	0.0337227	0	0.29472
GSM1520382	0	0.0495406	0	0.125663	0.135516	0	0	0	0.0816981	0	0.0255071	0.0570207	0.222662	0	0	0	0	0.0113606	0	0	0	0.291033
GSM1520383	0	0.0643557	0	0.0539683	0.0737065	0.0047053	0	0	0.0815016	0	0	0.069302	0.175083	0.00475493	0	0	0	0.012177	0	0	0	0.460446
GSM1520384	0.000138257	0.0682804	0	0.0852335	0.081534	0.0667703	0	0	0.10746	0	0.0266387	0.0427017	0.374497	0.00521779	0	0.0279261	0	0.00864652	0	0.0115621	0	0.0933933
GSM1520385	0	0.0520939	0	0.0218123	0.0419941	0.0102853	0	0	0.09555	0	0	0.0639376	0.291718	0.0773304	0	0.0487278	0	0.00467098	0	0.0453167	0	0.246563
GSM1520386	0.0399846	0	0	0.237219	0.0663986	0	0	0	0.0762885	0	0	0.0658287	0.215848	0	0	0	0	0.0140285	0.0123676	0	0	0.272036
GSM1520387	0	0.0726357	0	0.160917	0.0714556	0	0	0	0.122928	0	0	0.0856414	0.249246	0.0141209	0	0	0	0.00995202	0	0.0183625	0	0.194741
GSM1520388	0	0.0470276	0	0.202438	0.179036	0	0	0	0.108195	0	0.0705682	0.0458915	0.145098	0	0	0.0246032	0	0	0.00807096	0.000329461	0.00259135	0.166151
GSM1520389	0	0.0506235	0	0.144468	0.111229	0	0	0	0.100012	0	0.0421678	0.0711302	0.237924	0	0	0.0393278	0	0.0121575	0	0.0171407	0	0.17382
GSM1520390	0.0103732	0.0240482	0.0072213	0.182403	0.0912546	0.0695049	0	0	0.074415	0	0	0.153166	0.218611	0.00580563	0	0	0	0	0.00815313	0	0	0.155044
GSM1520391	0	0.0110931	0	0.06347	0.0596898	0	0	0	0.0764931	0	0	0.0638427	0.28783	0.018348	0	0	0	0	0	0.0476119	0	0.371621
GSM1520392	0	0.0400002	0	0.266972	0.0588374	0	0.00953096	0	0.0413133	0	0	0.181962	0.214878	0.0116933	0	0	0	0.00294018	0	0	0	0.171873
GSM1520393	0	0.0392881	0	0.106566	0.0860641	0	0.0056288	0	0.0399785	0	0	0.126059	0.228244	0.0294243	0	0	0	0.00246006	0.0156692	0	0	0.320617
GSM1520394	0	0.0480287	0	0.235184	0.108669	0	0	0	0.120738	0	0.0303708	0.074541	0.295277	0.0158885	0	0	0	0.00984778	0	0	0	0.0614552
GSM1520395	0	0.0693948	0	0.0756539	0.0720742	0	0	0	0.0585363	0	0.00396312	0.0906897	0.315367	0.00977134	0	0	0	0.00944333	0	0.0527308	0	0.242376
GSM1520396	0	0.0565237	0	0.198406	0.0515794	0.0697589	0.00737928	0	0	0	0	0.111055	0.091699	0	0	0.0506328	0	0.00509582	0.0181773	0	0.0307411	0.308952
GSM1520397	0	0.0742292	0	0.00326819	0.0730495	0	0	0	0.0483899	0	0	0.0608225	0.0689452	0.0298629	0	0.00387536	0	0	0	0.0550016	0	0.582556
GSM1520398	0	0.0441073	0	0.332622	0.0332652	0	0	0	0.086778	0	0.0473518	0.135155	0.216632	0	0	0	0	0	0	0.0207672	0	0.0833214
GSM1520399	0	0	0	0.0713154	0.111884	0	0	0	0.0769406	0	0.0620857	0.0265278	0.190466	0.0560911	0	0.0127112	0	0	0	0.0264561	0	0.365522
GSM1520400	0	0.0318805	0.00603534	0.104065	0.0426099	0.0889703	0	0	0.040601	0	0.00247215	0.0775414	0.272702	0.00507788	0	0	0	0.00303691	0	0.0253128	0	0.299695
GSM1520401	0	0.0479111	0	0.0593984	0.089563	0	0	0	0.0198018	0	0.0116101	0.0545001	0.240437	0	0	0	0	2.39692e-05	0	0.0208933	0	0.455861
GSM1520402	0	0.0294015	0	0.251478	0.032534	0	0	0	0.0965101	0	0.0107009	0.114707	0.285205	0.00218834	0	0	0	0.00337188	0	0.00677155	0	0.167131
GSM1520403	0.0222774	0	0	0.0948488	0.0521313	0	0	0	0.0928398	0	0.0148166	0.0588987	0.1506	0.0491133	0	0	0	0.00217044	0	0.0681175	0	0.394186
GSM1520404	0	0.00447087	0	0.368747	0	0	0	0	0.0470126	0	0	0.129142	0.160608	0.011876	0	0	0.01005	0.0045754	0.0216286	0	0	0.24189
GSM1520405	0	0.0488393	0	0.120236	0.0293644	0.0106972	0	0	0.0922691	0	0	0.0793797	0.270624	0.0481479	0	0	0	0	0	0.010274	0	0.290168
GSM1520406	0	0.0374041	0	0.0830422	0.0461304	0	0	0	0.0788953	0	0	0.0837963	0.300812	0.0646825	0	0	0	0	0.0164097	0	0	0.288827
GSM1520407	0	0.015118	0	0.0688353	0.0600281	0	0	0	0.0696861	0	0	0.0366773	0.352152	0.0430343	0	0	0	0	0.000550378	0.00714079	0	0.346778
GSM2175018	0	0.0394849	0	0.18577	0.0653506	0.0256895	0	0	0.0993708	0	0	0.105109	0.231855	0.026356	0	0	0	0.00581306	0	0.0364115	0	0.178789
GSM2175019	0	0.0581565	0	0.117231	0.0117449	0	0	0	0.101288	0	0.0122425	0.0929502	0.266451	0.0419133	0	0	0	0	0	0.0722294	0	0.225793
GSM2175020	0	0.0631921	0	0.153736	0.0187657	0	0	0	0.0780203	0	0.00412815	0.0579069	0.310767	0.00911455	0	0	0	0.0121294	0	0	0	0.29224
GSM2175021	0.0343271	0	0	0.026557	0.154133	0.00491154	0	0	0.053492	0	0.00351553	0.043659	0.163449	0.0569142	0	0	0	0.00798848	0.026396	0	0	0.424657
GSM2175022	0	0.0193154	0	0.0835936	0.1301	0	0	0	0.0750461	0	0.0403597	0.0647774	0.283136	0.04087	0	0	0	0.00212078	0	0.0102036	0	0.250478
GSM2175023	0	0.0558938	0	0.181375	0.188912	0	0	0	0.0704878	0	0.0200419	0.0687451	0.159216	0	0	0	0	0.0105217	0.0314734	0	0.00442427	0.20891
GSM1528364	0.00631601	0.00375472	0.000469948	0.131704	0.0968482	0	0.0187914	0	0.0264717	0	0.0485041	0.0296365	0.308084	0.0120975	0	0	0	0.00551939	0	0.0165922	0	0.29521
GSM1528365	0.00783391	0	0.0178294	0.100931	0.0614589	0.0200744	0	0	0.0192682	0	0.109208	0	0.170218	0.0559991	0	0	0	0	0	0.0213905	0	0.415788
GSM1528366	0.0133321	0	0	0.115636	0.124915	0	0	0	0	0	0.166796	0	0.307426	0	0	0	0	0.00506874	0	0.00802001	0	0.258806
GSM1528367	0.0225393	0	0	0.0962047	0.124144	0	0.0209925	0	0.00888018	0	0.136953	0	0.331094	0.0143754	0	0	0	0.00272935	0.00534207	0	0	0.236746
GSM1528368	0.00704231	0.00603126	0	0.123169	0.119322	0	0.0063128	0	0.0186783	0	0.0873778	0	0.186731	0.0323487	0	0.00478213	0	0.00406268	0.0261589	0	0	0.377983
GSM1528369	0.0332524	0	0	0.0544875	0.0833156	0.0329396	0.00886252	0	0.0307487	0	0.158411	0	0.253859	0.0162533	0	0.00196218	0	0.000690871	0	0.020376	0	0.304842
GSM1528370	0.00440082	0	0	0.137741	0.0863284	0	0.0449892	0	0.0200405	0	0.0918543	0	0.23255	0.0351225	0	0	0	8.0232e-05	0	0.0456637	0	0.301229
GSM1528371	0	0.000822004	0.00196535	0.252534	0	0	0.03002	0	0.0433381	0	0.213264	0	0.216788	0.0772675	0	0	0	0	0	0	0.00873983	0.155262
GSM1528372	0.00129164	0.00664646	0	0.166703	0.0693137	0	0.0543045	0	0.00547344	0	0.102556	0	0.283803	0.000893259	0	0	0	0.00244809	0.00509908	0	0	0.301467
GSM1528373	0.0296081	0	0.00800829	0.0643172	0.124985	0	0.0427105	0	0.0177653	0	0.116629	0	0.225091	0.0201607	0	0	0	0.0152349	0	0	0	0.33549
GSM1528374	0.0456326	0	0	0.107689	0.0434976	0.0013743	0.0617209	0	0.0318821	0	0.129758	0	0.306446	0.0402541	0	0	0	0.00141197	0	0	0	0.230333
GSM1528375	0	0.0062056	0	0.066027	0.0885188	0	0.0310953	0	0.0123953	0	0.0470859	0.0356955	0.305581	0.0346229	0	0	0	0.00251306	0.00146583	0	0	0.368793
GSM1528376	0.010118	0.00237262	0	0	0.121772	0.121262	0.0185503	0	0	0	0.139494	0	0.257444	0	0	0	0	0.00605403	0	0.00492679	0	0.318006
GSM1528377	0.0181792	0	0.0117499	0.0992289	0.139437	0.06488	0.0522353	0	0	0	0.107763	0	0.137142	0	0	0	0	0.00455216	0	0	0	0.364833
GSM2369703	0	0.00510015	0.0589676	0.0561931	0.0906155	0.0810002	0.000780352	0	0.107315	0	0.191548	0	0.168373	0.0170743	0	0	0	2.87226e-05	0	0	0	0.223004
GSM2369705	0.0291888	0	0.00544739	0.131755	0.0904833	0.00133535	0.0435155	0	0.0235023	0.0190412	0.139648	0	0.266935	0.0158575	0	0	0	0.00132199	0.00104188	0	0	0.230927
GSM2369707	0.0232526	0	0	0.178487	0.0601498	0	0.0271139	0	0.0285106	0	0.189894	0	0.193899	0.0237662	0	0	0	0.000672013	0	0.00106076	0	0.273194
GSM2369709	0.00289405	0.0055494	0	0.19365	0.0444903	0	0.0581575	0	0.0416491	0	0.239485	0	0.210865	0.0289278	0	0	0	0.00161794	0	0	0	0.172714
GSM2369711	0.0100136	0.00235933	0	0.132099	0.086193	0	0.00461264	0	0.0309898	0	0.140938	0	0.297811	0.018236	0	0	0	0	0.00831627	0	0	0.268431
GSM2369713	0.00374983	0	0.00105907	0.094389	0.0709332	0	0.0124799	0	0.00240511	0	0.0421777	0	0.308995	0	0	0	0	0.0125827	0	0	0	0.451228
GSM2369715	0.0266552	0.00411191	0	0.176735	0.152655	0	0.0542933	0	0.00879778	0	0.156189	0	0.209222	0	0	0.00492963	0	0.00262255	0.00414511	0	0	0.199644
GSM2369717	0.00775397	0.00957597	0	0.218863	0.0905545	0.0189806	0.000229998	0	0.0759957	0	0.1427	0	0.180661	0.0255503	0	0	0	0.00147731	0.00596048	0	0	0.221698
GSM2369719	0	0.0120962	0	0.199543	0.08059	0	0.0584906	0	0	0	0.109469	0	0.192563	0.0369116	0	0	0	0.00292578	0	0	0	0.307411
GSM2369721	0.000706302	0.0109977	0	0.152867	0.0744415	0	0.0381285	0	0	0	0.116395	0	0.20996	0.0198152	0	0	0	0.00353487	0	0	0	0.373154
GSM2369723	0.00635071	0.000163141	0	0.191571	0.0305645	0	0.0737077	0	0.0155412	0	0.100858	0	0.273326	0.0330094	0	0	0	0.00325993	0	0.00956123	0	0.262087
GSM2369725	0.00235644	0	0	0.19537	0.0506489	0	0.0299849	0	0.0352128	0	0.156074	0.0396099	0.173479	0.0365261	0	0	0	0	0.00596992	0	0	0.274768
GSM2369727	0	0.0148868	0	0.0821981	0.0621274	0.0189087	0.0164854	0	0.0204464	0	0.106541	0	0.291108	0.0435282	0	0	0	0.00696272	0	0.00270003	0.00417014	0.329937
GSM2369729	0.00962764	0.00286447	0	0.0483992	0.0714944	0.0116587	0.00916169	0	0.0267611	0	0.0954048	0	0.368383	0.049181	0	0	0	0.0161767	0	0.0087644	0	0.282123
GSM2369731	0.0214589	0.00502865	0	0.0497727	0.116963	0.0214091	0.0404002	0	0.00987539	0	0.0852788	0	0.36671	0.00213019	0	0	0	0.00741124	0	0.0130159	0	0.260546
GSM2369733	0	0.0133832	0.0157047	0.0482123	0.0659584	0.0176583	0.00276149	0	0.0344367	0	0.127711	0	0.268443	0.0515329	0	0	0	0.00701569	0	0.0136649	0.0204151	0.313102
GSM2369735	0	0.00616258	0	0.0943623	0.0357696	0	0.0754947	0	0	0	0.314984	0	0.161026	0.0132121	0	0	0	0.000215074	0	0.0158967	0	0.282877
GSM2369737	0	0.00259647	0.00028186	0.0346064	0.0624665	0	0.0544877	0	0	0	0.155183	0	0.182233	0.0230553	0	0	0	9.81624e-06	0	0.0479425	0	0.437138
GSM2369739	0.0165936	0.00913655	0	0.0876884	0.078387	0	0.0977703	0	0	0	0.234022	0.0136617	0.191489	0	0	0	0	0.00513744	0	0.0052221	0	0.260891
GSM2369741	0	0.008577	0	0.050269	0.0528071	0	0.085	0	0	0	0.213072	0.00274656	0.146024	0.0300186	0	0	0	0.00333244	0	0.00294368	0	0.40521
GSM2369743	0.0310853	0	0.0209157	0.130992	0.163858	0.00957251	0.0297705	0	0.00589666	0	0.0696138	0	0.0983425	0.0216238	0	0	0	0.00330625	0	0.00227592	0	0.412747
GSM2369745	0.0228003	0	0.00357491	0.123567	0.116936	0	0.0503955	0	0	0	0.0865672	0	0.145799	0.00516084	0	0	0	0.00745866	0	0.0142888	0	0.423451
GSM2369747	0.075428	0	0.00259069	0.130716	0.163986	0.0158121	0.0391974	0	0	0	0.060739	0	0.107698	0.0158082	0	0	0	0.00376984	0.00721244	0	0	0.377042
GSM2369749	0.0424596	0	0.000167884	0.13012	0.166087	9.04848e-05	0.00702732	0	0.0264945	0	0.121409	0	0.136153	0.0361277	0	0	0	0.000101714	0	0	0	0.333762
GSM2369751	0.00968756	0.00174207	0	0.0949085	0.0859839	0.0208446	0.00978006	0	0.0280926	0	0.0884458	0	0.145454	0.0847736	0	0	0	0	0	0.000658402	0	0.429629
GSM2369753	0.0318249	0	0	0.026564	0.0445466	0	0.0032322	0	0.0169569	0	0.0427146	0	0.177058	0.0558963	0	0	0	0	0	0.0373994	0	0.563807
GSM2369755	0.00558421	0	0.0188303	0.0858012	0.062029	0	0.000212799	0	0.0385808	0	0.135296	0	0.153572	0.0595591	0	0	0	0	0	0.0311085	0	0.409426
GSM2369757	0.0134881	0	0	0.139308	0.0688416	0	0.021485	0	0.0140093	0	0.0351001	0.00074101	0.214145	0.0369195	0	0	0	0.00210005	0	0.00941712	0	0.444445
GSM2369759	0.031414	0	0.012057	0.0565077	0.0413257	0	0	0	0.0163716	0	0.0338767	0.000406069	0.382415	0.0539455	0	0	0	0.00235399	0	0.0405802	0	0.328746
GSM2369761	0.0427161	0	0	0.18091	0.0969969	0	0.104999	0	0	0	0.121297	0	0.216042	0.00744415	0	0.0178175	0	0.000387822	0	0	0	0.211389
GSM2369763	0	0.00850972	0	0.144234	0.0276567	0	0.0368474	0	0.0463798	0	0.14654	0.00313728	0.398142	0.00682559	0	0.0175599	0	0.0130841	0	0	0	0.151083
GSM2369767	0	0.00958617	0	0.160295	0.0638247	0	0.0418988	0	0.0162942	0	0.329584	0	0.195063	0.0295579	0	0	0	0	0	0	0	0.153895
GSM2369769	0	0.0104891	0.00752466	0.0809715	0.0418589	0	0.0915893	0	0	0	0.210665	0	0.233524	0.0351864	0	0	0	0.00531189	0	0.0136794	0	0.269199
GSM2369771	0	0.0216913	0	0.25097	0.110038	0	0.0331455	0	0.0193768	0	0.242234	0	0.20699	0.0189332	0	0	0	0.00221525	0	0	0	0.0944059
GSM2369773	0	0.0109577	0	0.21809	0.0849484	0	0.0488345	0	0.0347033	0	0.307004	0	0.180079	0.0208664	0	0	0	0	0.00319451	0	0	0.0913216
GSM2369775	0	0.00100631	0	0.139794	0.0615618	0	0.102961	0	0	0	0.207587	0	0.273826	0.015215	0	0	0	0.00262802	0	0.000560019	0	0.19486
GSM2369777	0	0.00523161	0	0.109651	0.0557374	0	0.0472443	0	0.0035727	0	0.14592	0	0.26921	0.0325191	0	0	0	0.0035072	0	0.0358113	0	0.291595
GSM2369779	0	0.00136845	0	0.0909277	0.0557931	0	0.0712621	0	0	0	0.218084	0	0.197196	0.026878	0	0	0	0.000357436	0	0.0468186	0	0.291315
GSM2369781	0	0	0	0.179441	0.0776963	0	0.0800439	0	0.0071475	0	0.247026	0	0.131853	0.0280164	0	0	0	0	0	0.0375473	0	0.211228
GSM2369783	0	0.00148426	0	0.110655	0.0739625	0	0.0394374	0	0.0132384	0	0.195475	0	0.327111	0.0291415	0	0	0	0.000110996	0	0.0332701	0	0.176113
GSM2369785	0	0.00960397	0	0.113224	0.0475767	0.0240317	0.0653829	0	0	0	0.153222	0	0.342189	0.0103027	0	0	0	0.000683141	0.00431544	0	0	0.229468
GSM2369787	0	0.00792247	0	0.0680207	0.0825215	0.0296784	0.0412962	0	0	0	0.0823765	0	0.356397	0	0	0	0	0.022347	0.00208515	0	0	0.307355
GSM2369789	0	0.0227823	0.00225321	0.215757	0.027495	0	0.0199282	0	0.036025	0	0.0788748	0	0.292428	0.00961149	0	0	0	0.00953805	0.0050966	0	0	0.28021
GSM2369791	0	0.024356	0.00105183	0.131428	0.0139813	0	0.00787493	0	0.00683186	0	0.0449461	0.00723278	0.318453	0.00639298	0	0	0	0.0117593	0	0	0	0.425691
GSM2369793	0.00538962	0.0157928	0.00677568	0.185926	0.0380967	0	0.0412147	0	0.0217419	0	0.131704	0	0.226155	0.0195954	0	0	0	0.00577167	0	0.00316734	0	0.298669
GSM2369795	0	0.0220225	0.0241111	0.130065	0.116434	0	0.0244269	0	0.0052356	0	0.126307	0	0.240015	0.0226795	0	0	0	0.0122093	0.0117188	0	0	0.264775
GSM2369797	0.0131305	0	0	0.176852	0.0543558	0	0.02203	0	0	0	0.134127	0	0.0903821	0.0232459	0	0	0	0	0	0.024769	0	0.461108
GSM2369799	0.0618296	0	0	0.176204	0.0739527	0	0.0535578	0	0	0	0.147136	0	0.150188	0.00716427	0	0	0	0.000752526	0	0	0	0.329215
GSM2369801	0.0131169	0	0	0.161968	0.0320791	0	0.0209183	0	0	0	0.117999	0.00745262	0.141038	0.0127227	0	0	0	0.00142754	0	0.0323561	0	0.458922
GSM2369803	0	0.00766776	0.0132352	0.0851853	0.0303342	0.0217742	0.0227142	0	0	0	0.111335	0	0.355493	0.0558828	0	0	0	0	0	0.00733714	0	0.289041
GSM2369805	0.00669503	0	0.0529798	0.0746226	0.0258043	0	0.0172089	0	0.00928264	0	0.0598559	0	0.378623	0.110137	0	0	0	0.000379691	0	0.0540016	0	0.210409
GSM2369807	0.0186384	0.0105213	0	0.157348	0.0642265	0.0378837	0.0252106	0	0.015474	0	0.19646	0	0.290244	0.0250611	0	0	0	0	0.00566847	0	0	0.153264
GSM2369809	0	0.00987749	0	0.0924248	0.03461	0	0.00836559	0	0.0158244	0	0.144514	0	0.357126	0.0407104	0	0	0	0.00159698	0.00355256	0	0	0.291397
GSM2369811	0.0205228	0	0	0.117184	0.0729342	0	0.0325933	0	0.00419509	0	0.108348	0	0.253281	0.0716478	0	0	0	0	0	0.00674442	0	0.312549
GSM2369813	0.024076	0	0	0.0358127	0.0600036	0	0.00865546	0	0.0156764	0	0.0952844	0	0.301314	0.121617	0	0	0	0	0	0.0437302	0	0.29383
GSM2369815	0.0333898	0	0	0.161303	0.126097	0	0.0470862	0	0.0387481	0	0.251759	0	0.184092	0.0230041	0	0	0	0	0	0	0.00166419	0.132856
GSM2369817	0.0185432	0	0	0.153856	0.0899991	0	0.0162472	0	0.0239059	0	0.133841	0	0.217188	0.0575061	0	0	0	0	0	0.0102186	0	0.278695
GSM2369819	0	0	0.00751172	0.155029	0.106204	0	0.128497	0	0	0	0.136503	0.0640488	0.310856	0	0	0	0	0.00551092	0	0	0	0.0858404
GSM2369821	0	0	0	0.147724	0.11372	0	0.0809399	0	0	0	0.0932413	0.0433577	0.299749	0	0.00284928	0	0	0.012178	0	0.0304899	0	0.175751
GSM2369823	0.0060335	0	0	0.250937	0.0450254	0	0.125645	0	0	0	0.222149	0.0525504	0.236497	0	0	0.0103659	0	0.00397078	0	0.000517046	0	0.0463089
GSM2369825	0	0.00343195	0	0.186609	0.118278	0	0.132266	0	0	0	0.0919386	0.132351	0.266683	0	0	0.00727637	0	0.00237096	0	0	0	0.0587941
GSM2369827	0.00055996	0.00685074	0	0.221466	0.0893823	0	0.0524538	0	0.0139356	0	0.0906509	0	0.227472	0.0132679	0	0	0	0	0.00193647	0	0	0.282024
GSM2369829	0.0123718	0.00660205	0	0.240605	0.174013	0	0.0594832	0	0.00629188	0	0.149172	0	0.242878	0.0028629	0	0	0	0.000797346	0	0	0.00863016	0.096292
GSM2369831	0	0.0103248	0	0.125395	0.0762451	0	0.0461526	0	0	0	0.0670305	0	0.297767	0	0	0	0	0.00420808	0	0	0	0.372877
GSM2369833	0.00313116	0.0370754	0.00838176	0.0277916	0.140113	0.0427393	0.00558071	0	0.0249538	0	0.231293	0	0.191647	0.0192191	0	0	0	0.00398482	0.00600506	0	0	0.258084
GSM2369835	0.00398274	0.0088835	0	0.0358425	0.022693	0	0.0279202	0	0	0.0223838	0.0895954	0	0.316826	0.0328995	0	0	0	0.011609	0	0.0317977	0	0.395567
GSM2369837	0.0447879	0	0	0.0550712	0.0749972	0	0.0156397	0	0.0486096	0	0.259899	0	0.267287	0.00392836	0	0	0	0.00266328	0	0	0	0.227116
GSM2369839	0.00242182	0.0145457	0	0.0603451	0.0875566	0	0.0126422	0	0.0452639	0	0.221998	0	0.248826	0.0285117	0	0	0	0.00424933	0	0	0	0.273639
GSM2369841	0.00471598	0.00334118	0	0.102683	0.0907035	0	0.031367	0	0.010486	0	0.166684	0	0.175323	0.0388197	0	0	0	0.00115359	0	0.0202035	0	0.354519
GSM2369843	0.000976843	0.00763537	0.00288181	0.0839497	0.129895	0	1.93952e-05	0	0.0318541	0	0.116515	0.00289672	0.272409	0.0123005	0	0	0	0.00926023	0	0.000404686	0	0.329002
GSM2369845	0.00616233	0.0107036	0.00255123	0.182209	0.135102	0	0.0376258	0	0.0360536	0	0.153643	0	0.202997	0.0133192	0	0	0	0.00428485	0.000359282	0	0.000513992	0.214475
GSM2369847	0	0.0115858	0	0.114671	0.110737	0.00753144	0.0190329	0	0.0261964	0	0.125663	0	0.240816	0	0	0	0	0.00605832	0	0	0.0137361	0.323973
GSM2369849	0.0332212	0	0	0.121193	0.112047	0.0243729	0	0	0.0381677	0	0.169754	0	0.192119	0.0139835	0	0	0	0.00216954	0	0.000278283	0	0.292694
GSM2369851	0.0526284	0	0	0.099147	0.123527	0.0206629	0	0	0.0331506	0	0.110354	0	0.199584	0.0250834	0	0	0	0.0015975	0	0.00273764	0	0.331527
GSM2369853	0.0789138	0	0	0.113656	0.146336	0.0160334	0	0	0.027693	0	0.132275	0	0.11088	0.026204	0	0.0163944	0	0.00224591	0	0	0	0.32937
GSM2369855	0.0586871	0	0	0.0803885	0.154588	0.00979339	0.00200078	0	0.0264395	0	0.135505	0	0.13992	0.0262745	0	0.0092636	0	0.00194983	0	0.0138119	0	0.341378
GSM2369857	0.0163911	0	0.0138305	0.0569733	0.0817688	0	0.016926	0	0.00516723	0	0.0484447	0.0183861	0.173509	0.0130209	0	0	0	0.000688501	0	0.0302536	0	0.524641
GSM2369859	0.0210257	0	0	0.139276	0.109119	0	0.0403894	0	0.00782083	0	0.208842	0	0.172374	0.0179749	0	0	0	0.000144289	0	0.0112237	0	0.271809
GSM2369861	0.00171233	0	0.000667784	0.120727	0.0466147	0	0.0640491	0	0	0	0.140844	0.083052	0.177284	0.0418008	0	0	0	0.000184767	0	0.027405	0	0.295657
GSM2369863	0.00949278	0	0	0.0648243	0.0675791	0	0.0835961	0	0	0	0.115948	0.0769087	0.152004	0.0735802	0	0	0	0	0	0.0379041	0	0.318162
GSM2369865	0.0610949	0	0.000947204	0.108217	0.117505	0	0.0202585	0	0.0613054	0	0.209329	0.00363251	0.259971	0.00459162	0	0	0	0.00645013	0	0	0	0.146698
GSM2369867	0.0213484	0	0	0.0134381	0.0935023	0	0.0263609	0	0	0.0431826	0.0657411	0	0.248162	0.0194298	0	0	0	0.0118988	0	0.0111822	0	0.445754
GSM2369869	0.0326294	0	0	0.151695	0.101227	0.0198488	0.0435498	0	0.0304626	0	0.140242	0	0.246566	0.0119899	0	0	0	0.00610479	0.010626	0	0	0.205059
GSM2369871	0.0235771	0.0124049	0	0.235025	0.0968108	0	0.0586088	0	0.0554798	0	0.156879	0.00656742	0.157166	0.0149437	0	0	0	0.00204764	0.0162218	0	0.00285425	0.161413
GSM2369873	0.0121676	0.0246747	0	0.121307	0.117027	0.0350912	0.0206677	0	0.0338177	0	0.0564344	0.00760982	0.240065	0.0291391	0	0	0	0.00286894	0.0149613	0	0.0170003	0.267168
GSM2369875	0.0144967	0	0	0	0.0862529	0.0931794	0.00061839	0	0.0121268	0	0.058973	0.0135847	0.290239	0.0425265	0	0	0	0.00416213	0	0.0230593	0	0.360781
GSM2369877	0.012734	0.00252995	0	0.0384713	0.0718552	0.0602477	0.0598235	0	0	0.0199214	0.12369	0.00650711	0.280263	0.0459087	0	0	0	0.00605168	0	0.0166674	0	0.25533
GSM2369879	0.0149915	0.0071904	0	0.0331933	0.102763	0.109511	0	0	0.0576925	0	0.0954325	0.0180324	0.248043	0.071178	0	0	0	0	0	0.0206212	0	0.221351
GSM2369881	0.0135146	0	0	0.00018182	0.0684384	0.0861642	0	0	0.0483821	0	0.064149	0.0343123	0.24833	0.0637345	0	0	0	0	0	0.0394238	0	0.333369
GSM2369883	0	0.00489713	0.0108645	0.077282	0.0144565	0	0.0139482	0	0	0	0.0457482	0	0.467614	0.048881	0	0	0	0.00550023	0	0.0113196	0	0.299488
GSM2369885	0	0.00673828	0.0310753	0.0154962	0.0358709	0	0.00707611	0	0	0.0103661	0.0385958	0	0.363566	0.0312435	0	0	0	0.00572781	0	0.0180018	0	0.436242
GSM2369887	0.0421129	0	0	0.279031	0.0101104	0	0.0363267	0	0.0292534	0	0.0812665	0.0237399	0.326044	0	0	0	0	0.00670212	0.00754061	0	0	0.157872
GSM2369889	0	0	0	0.0544656	0.0322683	0.00727943	0.033106	0	0	0	0.0623654	0	0.381655	0.00350905	0	0	0	0.0135757	0.0233975	0	0	0.388378
GSM2369891	0.00287468	0.0141161	0.00051268	0.125775	0.102804	0.0421535	0.0179602	0	0.00328397	0	0.00252953	0.0445006	0.176055	0	0	0	0	0.00426689	0.010505	0	0	0.452663
GSM2369893	0.00714438	0	0	0.119478	0.106181	0	0.0273419	0	0.00784406	0	0.045986	0.0184736	0.308413	0.0415313	0	0	0	0.00544813	0.00336528	0	0	0.308793
GSM2369895	0.00278094	0.00901021	0	0.124665	0.109201	0	0.0486276	0	0.00283208	0	0.103513	0	0.164942	0.0207711	0	0	0	0	0.0134642	0	0.0241025	0.376091
GSM2369897	0	0.0280015	0	0.194241	0.204194	0.0242143	0.0406704	0	0	0	0.0297628	0.0304244	0.17866	0.029015	0	0	0	0.00945273	0.0163941	0	0	0.214969
GSM2369899	0	0.015555	0	0.19637	0	0	0.114507	0	0	0	0.161548	0	0.183253	0	0	0.00264108	0	0.000868644	0	0.00372544	0	0.321531
GSM2369901	0	0.000553108	0.00753771	0.142147	0.00546243	0	0.075032	0	0	0.00386775	0.0325573	0.0405558	0.21916	0.00163394	0	0	0	0.00152818	0	0.00851686	0	0.461448
GSM2369903	0	0.00439137	0	0.196051	0	0	0.106243	0	0	0	0.201187	0.017284	0.189608	0	0	0	0	0.0017019	0	0.00234398	0	0.28119
GSM2369905	0	0	0	0.273336	0	0	0.0627599	0	0	0	0.0492387	0.0533888	0.234062	0.00351811	0	0	0	0.00940458	0	0.0108742	0	0.303418
GSM2369907	0.0128703	0.00524481	0	0.0581053	0.101144	0.0144445	0.00877185	0	0.0179543	0	0.07752	0	0.287946	0.082914	0	0	0	0.00476863	0	0.00309397	0	0.325222
GSM2369909	0.0225952	0	0	0.0753774	0.118746	0	0.0278218	0	0.00155529	0	0.075964	0	0.318802	0.0281251	0	0	0	0.0135463	0	0.0182933	0	0.299173
GSM2369911	0.0105773	0.00631376	0	0.134386	0.163284	0.012282	0	0	0.0306546	0	0.0788854	0	0.213123	0.010321	0	0	0	0.00709177	0	0.000520173	0	0.332561
GSM2369913	0.00441149	0.0225138	0	0.111743	0.172912	0.0377404	0	0	7.82534e-05	0	0.0426014	0	0.183778	0.0210989	0	0	0	0.00314299	0	0	0	0.39998
GSM2369915	0.0222449	0.00359215	0	0.144943	0.0810357	0	0.058577	0	0	0	0.17697	0	0.256581	0.00216618	0	0	0	0.00114003	0.0143073	0	0	0.238443
GSM2369917	0	0.0143223	0	0.117047	0.0280581	0	0.045798	0	0.0192582	0	0.217282	0	0.302572	0.0120904	0	0	0	0.00273735	0	0.00214828	0	0.238686
GSM2369919	0.0178181	0.00864385	0.0364434	0.176066	0.0540039	0	0.0262046	0	0	0	0.124238	0.0345083	0.273149	0.013607	0	0	0	0.000769522	0.00475604	0	0	0.229792
GSM2369921	0.0389588	0	0	0.230572	0.109522	0	0.0130089	0	0.0306082	0	0.267722	0	0.219475	0.000827974	0	0	0	0.000520383	0.00292971	0	0	0.085855
GSM2369923	0	0	0	0.0635378	0.0405801	0.0420088	0.0134444	0	0.0185292	0	0.0824614	0	0.216425	0.0786691	0	0	0	0	0	0.0017445	0	0.4426
GSM2369925	0.0231288	0	0	0	0.0441823	0	0.0104898	0	0.0200394	0	0.0328336	0	0.24432	0.0671542	0	0	0	0.000449489	0	0.0100006	0	0.547401
GSM2369927	0	0.00326657	0	0.0748775	0.0590753	0.0224697	0.0241359	0	0	0	0.0710199	0	0.195125	0.0200677	0	0	0	0.00200921	0.00068622	0	0	0.527267
GSM2369929	0.0151257	0	0	0.0323321	0.139516	0	0.027355	0	0	0.00628128	0.0457778	0	0.267198	0.00524486	0	0	0	0.0126953	0	0.0140632	0	0.434411
GSM2369931	0.0070778	0.00656146	0	0.0421179	0.0772662	0.072973	0.0256786	0	0.0131923	0	0.161391	0	0.252963	0.0352698	0	0	0	0	0.0109708	0	0	0.294537
GSM2369933	0	0.0210603	0	0.0110775	0.0877013	0	0.0106034	0	0.0108695	0	0.0927518	0	0.383163	0.0282773	0	0	0	0.000898056	0	0.00355058	0	0.350047
GSM2369935	0.0186888	0.00215987	0	0.0325226	0.0704838	0.0538385	0.0455902	0	0	0	0.218533	0	0.214814	0.0282826	0	0	0	0	0.0137065	0	0	0.30138
GSM2369937	0.037131	0	0.0184662	0.134485	0.0936158	0	0.045335	0	0	0	0.106873	0	0.125561	0.0166413	0	0	0	0.00498482	0	0.00595054	0	0.410956
GSM2369939	0.0395982	0	0.0148906	0.0678735	0.091584	0	0.0128704	0	0.00690696	0	0.0451564	0	0.236069	0.0357098	0	0	0	0.00772877	0	0.0271955	0	0.414417
GSM2369941	0.0827556	0	0	0.215859	0.143534	0	0.0298547	0	0.041378	0	0.149421	0	0.138794	0.0274387	0	0	0	0	0.00154741	0	0.0150354	0.154381
GSM2369943	0.0456518	0	0.00150605	0.112225	0.168031	0.0371497	0.0111817	0	0.0324378	0	0.0655621	0	0.151646	0.0361053	0	0	0	0	0	0.00339015	0	0.335114
GSM2369945	0.0093143	0	0	0.0781687	0.203593	0	0.0462338	0	0	0	0.111589	0	0.213015	0	0	0	0	0.00305973	0	0.00168039	0	0.333346
GSM2369947	0.0134256	0	0.00181929	0.0365908	0.0969359	0	0.0329478	0	0	0	0.0940939	0	0.358614	0	0	0	0	0.00358412	0	0.0345776	0	0.327411
GSM2369949	0.0168644	0.00107711	0	0.0827348	0.10864	0	0.0821693	0	0	0	0.147686	0	0.315294	0	0	0	0	0.00515691	0	0.0200372	0	0.22034
GSM2369951	0.023363	0	0	0.0440413	0.144191	0	0.0246779	0	0	0.00344735	0.133409	0.00123554	0.301773	0	0.000673834	0	0	0.0102607	0	0.00386422	0	0.309064
GSM2369953	0.0181896	0.00249811	0	0.074532	0.111016	0	0.052237	0	0	0	0.170703	0	0.221127	0.0849619	0	0	0	0.00165235	0	0	0	0.263083
GSM2369955	0.0308569	0	0.000786152	0.115224	0.0720257	0	0.0345562	0	0.0143329	0	0.213084	0	0.343625	0.0139157	0	0	0	0.00635872	0	0.0100701	0	0.145165
GSM2369957	0.0385799	0	0	0.0670354	0.117987	0.00905785	0.0630349	0	0	0	0.171469	0	0.320531	0	0	0	0	0.00632149	0	0	0	0.205984
GSM2369959	0.0223302	0	0.00674267	0.0949629	0.136646	0	0.0319626	0	0	0	0.133231	0	0.346507	0.00547329	0	0	0	0.00522317	0	0.00837225	0	0.208549
GSM2369963	0.0244418	0	0	0.214425	0.099138	0	0.00765186	0	0.049112	0	0.130146	0	0.247901	0.00785566	0	0	0	0.00263742	0.00314065	0	0	0.213551
GSM2369965	0.0274033	0	0	0.212962	0.100007	0	0.000517078	0	0.0735589	0	0.0927516	0.00398454	0.20357	0.00954529	0	0	0	0.000364812	0	0.00803966	0	0.267297
GSM2369967	0.0550966	0	0	0.24814	0.150633	0	0	0	0.081915	0	0.134052	0	0.176871	0	0	0	0	0	0	0	0.012873	0.140419
GSM2369969	0.0159942	0	0	0.214965	0.100834	0	0.0219717	0	0.0652837	0	0.167286	0	0.232829	0.00169589	0	0	0	0.00346419	0.00186395	0	0.0054336	0.168379
GSM2369971	0.0022094	0.0178335	0.00618802	0.0139524	0.106284	0.115469	0.00320521	0	0	0.00129251	0.070672	0	0.272766	0	0	0	0	0.00456855	0	0	0	0.385559
GSM2369973	0.00391772	0.0121614	0	0.091927	0.068421	0.0247143	0	0	0.043304	0	0.0723191	0	0.236137	0.0382295	0	0	0	0.001313	0	0.00978735	0	0.397769
GSM2369975	0.00693011	0.0198485	0.00256663	0.0974735	0.132287	0.0443435	0	0	0.0113172	0	0.132808	0	0.275308	0	0	0	0	0.00823918	0	0	0	0.268879
GSM2369977	0.0162817	0.0209895	0.00701764	0.0676795	0.126865	0.0574053	0.021764	0	0	0.00674777	0.0668881	0	0.249777	0	0	0	0	0.00343473	0.00257983	0	0	0.35257
GSM2369979	0	0.0137947	0	0.0899069	0.137789	0.0277191	0.00616877	0	0.0213942	0	0.0955323	0	0.288681	0.00240561	0	0	0	0.00463391	0.00945579	0	0	0.302519
GSM2369981	0.00443699	0.00528251	0.00182801	0.0550373	0.0620575	0	0.0320075	0	0	0	0.156708	0	0.356179	0.00340762	0	0	0	0.00319736	0	0.00349776	0	0.316361
GSM2369983	0.0110245	0.00818463	0	0.159406	0.180783	0.0772185	0.0287635	0	0.040187	0	0.130158	0	0.219602	0	0	0	0	0.000327754	9.26932e-05	0	0	0.144254
GSM2369985	0.00879446	0.012161	0	0.178622	0.0933832	0	0.069514	0	0.00868978	0	0.168806	0	0.231231	0	0	0.000227255	0	0.00120236	0	0.000859003	0	0.22651
GSM2369987	0.00927549	0.00702228	0	0.151393	0.0328133	0	0.0595772	0	0.0152141	0	0.127747	0	0.268201	0.0702677	0	0	0	0	0	0.00994872	0	0.24854
GSM2369989	0.0278879	0	0	0.113201	0.0976535	0	0.0168789	0	0	0	0.0271781	0.0183224	0.352553	0	0	0	0	0.00855513	0	0	0	0.337771
GSM2369991	0.00462077	0.0204944	0	0.211882	0.146284	0	0.0682513	0	0.0091679	0	0.135046	0	0.205428	0.00642158	0	0.00439395	0	0.00284776	0	0	0	0.185162
GSM2369993	0	0.0172416	0	0.0487601	0.0357985	0	0.0263146	0	0.0107352	0	0.0724725	0	0.349589	0.0150765	0	0	0	0.0018905	0.0215327	0	0	0.400588
GSM2369995	0	0.0081919	0	0.0636044	0.00485451	0	0.0270703	0	0	0.042867	0.0121762	0.000379522	0.255101	0	0	0	0	0.00340442	0	0	0	0.58235
GSM2369997	0.00190907	0.00142197	0	0.205203	0	0	0.0078733	0	0.0319339	0	0.176953	0	0.212479	0	0	0	0	0.000982783	0.00346433	0	0	0.35778
GSM2369999	0	0.00691092	0	0.116355	0.00488844	0	0.0168581	0	0	0	0.00345068	0.0403699	0.254098	0	0	0	0	0.0052724	0.00693143	0	0	0.544866
GSM2370001	0.0119509	0.00965237	0	0.218452	0.0797146	0.0619094	0.0545021	0	0.0167534	0	0.0520744	0.0184334	0.233007	0	0	0	0	0.00113632	0.0193177	0	0	0.223096
GSM2370003	0.00321017	0.00285341	0.013934	0.103848	0.0846776	0.0342363	0.0391662	0	0.00255754	0	0.0254109	0.0335455	0.302974	0.0279852	0	0	0	0.00325061	0.00400619	0	0	0.318344
GSM2370005	0.00215133	0.0164392	0	0.12061	0.109949	0.0619883	0.0502996	0	0.0279752	0	0.154711	0	0.259333	0.00251598	0	0	0	0.00423652	0.00573443	0	0	0.184057
GSM2370007	8.64496e-05	0.0110526	0	0.126074	0.0953414	0.0129879	0.0303751	0	0.00703826	0	0.0528957	0.0393265	0.26863	0	0	0	0	0.00228952	0.0137588	0	0	0.340143
GSM2370009	0	0.00871745	0	0.129896	0.0314274	0.00213245	0.0390326	0	0.000593396	0	0.0929636	0	0.370184	0.010514	0	0	0	0.0095364	0	0.000304552	0	0.304698
GSM2370011	0.0126268	0	0	0.115428	0.010016	0	0.0287913	0	0.00390653	0	0.0835346	0	0.286961	0.0476199	0	0	0	0.000819327	0	0.00207208	0	0.408225
GSM2370013	0.00409865	0.00297667	0	0.202622	0	0	0.0210927	0	0.0334	0	0.105938	0.00142072	0.211137	0.0568892	0	0	0	0	0.0276884	0	0	0.332737
GSM2370015	0	0.0155231	0	0.0828314	0.057938	0.0477603	0.0210679	0	0.00109499	0	0.0491397	0.0235349	0.24991	0.0203128	0	0	0	0.00259976	0.0280745	0	0	0.400213
GSM2370025	0	0.00797688	0.00169736	0.0876171	0.0642698	0	0.00630506	0	0.0211603	0	0.11075	0	0.0988357	0.0433891	0	0	0	0.00879521	0	0.0233866	0	0.525817
GSM2370027	0.0142302	0	0	0.101644	0.107362	0.00119906	0.0375822	0	0	0	0.17367	0	0.150093	0.0294877	0	0	0	0.00225542	0	0.0156078	0	0.366869
GSM2370029	0.0151462	0.00473726	0	0.227462	0.144402	0	0.00856432	0	0.0341421	0	0.160295	0	0.159734	0.0174781	0	0	0	0.00178462	0	0.00159855	0	0.224655
GSM2370031	0.00367256	0.00322175	0	0.177089	0.091447	0	0.0100763	0	0.00718241	0	0.166359	0	0.125487	0.0244198	0	0	0	0.00279039	0	0.0163066	0	0.371948
GSM2370033	0	0	0.0179176	0.166502	0.175976	0	0.0470501	0	0.0182878	0	0.0932119	0	0.149118	0.0148084	0	0	0	0.00640017	0	0.0223052	0	0.288422
GSM2370035	0.0167742	0	0.0101971	0.0555376	0.056427	0	0.0147764	0	0.00401241	0	0.0311911	0	0.255617	0.0574621	0	0	0	0.00394031	0	0.0517026	0	0.442362
GSM2370037	0.00335339	0.0106198	0	0.0990267	0.0857342	0	0.0346024	0	0	0	0.0940772	0	0.102672	0.0340105	0	0	0	0.00810094	0	0.0229818	0	0.504821
GSM2370039	0.00173541	0	0	0.116178	0.086864	0	0.0189663	0	0.0286733	0	0.0979602	0	0.263626	0.0503067	0	0	0	0.000729561	0	0.0344199	0	0.300541
GSM2370041	0.0191256	0	0	0.137952	0.0428464	0	0.0255148	0	0.0252756	0	0.109862	0	0.222661	0	0	0	0	0.00414927	0	0	0	0.412614
GSM2370043	0.0232907	0	0	0.170241	0.0658088	0	0.0189409	0	0.0475672	0	0.0593824	0.00796241	0.277357	0	0	0	0	0.00387808	0	0.00226281	0	0.323309
GSM2370045	0.013149	0.0091033	0	0.168807	0.1877	0.00463668	0.0115081	0	0.0148712	0	0.105692	0	0.220839	0.000294291	0	0	0	0.00430704	0	0	0	0.259093
GSM2370047	0.0137979	0.00125023	0.0111997	0.103851	0.147636	0.0233041	0.0153488	0	0.00452797	0	0.0517632	0.0323898	0.21375	0	0	0	0	0.0071789	0.00329732	0	0	0.370706
GSM2370049	0.0026594	0.00199314	0	0.0454763	0.0603469	0.08437	0.0198623	0	0	0.000154588	0.122189	0	0.27576	0.037444	0	0	0	0.000343935	0	0.00110509	0	0.348296
GSM2370051	0.0116922	0	0	0.0843334	0.0692208	0.0336666	0.0119447	0	0.0208541	0	0.0754464	0	0.390584	0.013705	0	0	0	0.00322085	0	0.00829507	0	0.277037
GSM2370053	0.0348776	0	0	0.0661702	0.065961	0.0986621	0.0538545	0	0	0	0.171141	0	0.20369	0.0198823	0	0	0	0.000210952	0.00390193	0	0	0.281648
GSM2370055	0	0.0170382	0	0.224519	0.00106205	0	0.033504	0	0.0191824	0	0.123914	0	0.274834	0.0443149	0	0	0	0	0	0.00368831	0.0133813	0.244561
GSM2370057	0.0195557	0	0.00102265	0.0983278	0.0410605	0	0.00298698	0	0.0259194	0	0.106769	0	0.217533	0.0416336	0	0	0	0	0.00404783	0	0	0.441144
GSM2370059	0.0452146	0	0.00300021	0.0697714	0.0458013	0	0	0	0.0299401	0	0.0493941	0	0.259526	0.0487211	0	0	0	0	0	0.0174166	0	0.431214
GSM2370061	0.0479896	0	0	0.0682341	0.0337914	0	0	0	0.0257186	0	0.0972387	0	0.298844	0.0546371	0	0	0	0	0	0.00326359	0	0.370283
GSM2370063	0.0165627	0	0	0.0844154	0.0654032	0	0.00255543	0	0.030355	0	0.098941	0	0.304408	0.0542367	0	0	0	0	0	0	0	0.343122
GSM2370077	0	0.0135987	0	0.104795	0.111273	0.0180672	0.027785	0	0.00971169	0	0.14518	0	0.275349	0.00180737	0	0	0	0.0027588	0	0.00685133	0	0.282822
GSM2370079	0.000300416	0.00403334	0.00221785	0.109264	0.0798456	0	0.0771708	0	0.00709334	0	0.23714	0	0.282712	0	0	0	0	0.00250492	0.00229896	0	0	0.195418
GSM2370081	0.0139921	0.00817347	0	0.255359	0.104856	0	0.0350591	0	0.0324419	0	0.157733	0.0126695	0.242839	0	0	0	0	0.00140756	0	0.00107846	0	0.134392
GSM2370083	0	0.00264705	0	0.157552	0.119693	0	0.0530447	0	0.0118213	0	0.175131	0	0.382447	0.0111909	0	0	0	0.0112252	0	0.0177539	0	0.0574957
GSM2370085	0.0075485	0	0	0.0310631	0.120621	0.0149071	0	0	0	0	0.0483698	0	0.16209	0.0306838	0	0	0	0.00912481	0	0.0396424	0	0.535949
GSM2370087	0.0151293	0	0	0.0768573	0.0351429	0	0.0280055	0	0.0224791	0	0.059649	0.00492962	0.298092	0.0366336	0	0	0	0.00542369	0	0.0133403	0	0.404318
GSM2370089	0.00737625	0.00151542	0.00215498	0.10912	0.109791	0	0.0203899	0	0	0	0.0626735	0.0275331	0.256885	0.0142545	0	0	0	0.00536115	0	0	0	0.382945
GSM2370091	0.00688141	0.0105918	0	0.0805741	0.115193	0.0428024	0.0264265	0	0	0	0.0816949	0	0.209959	0	0	0	0	0.00278459	0	0.00223714	0	0.420855
GSM2370093	0	0.00815747	0	0.0634468	0.133976	0	0.0361753	0	0	0	0.15098	0	0.272841	0.0327581	0	0	0	0.00157495	0	0	0.00854402	0.291546
GSM2370095	0.0143707	0	0	0.0670847	0.037849	0	0.0126912	0	0.0243849	0	0.0489667	0.0103468	0.230343	0.0806983	0	0	0	6.87852e-05	0	0.065228	0	0.407968
GSM2370097	0.0249723	0	0	0.100046	0.0594257	0	0.046161	0	0.0430099	0	0.245424	0	0.23336	0.0493079	0	0	0	0	0	0.0183219	0.0123052	0.167665
GSM2370099	0	0	0	0.105431	0.0105983	0	0.0883626	0	0	0	0.259969	0	0.257361	0.0348514	0	0	0	0.00107367	0	0	0.0117277	0.230625
GSM2370101	0.0030079	0	0.00260581	0.0661671	0.0757407	0	0.0321152	0	0.0233232	0	0.132956	0	0.193594	0.0352742	0	0	0	0	0.00379859	0	0	0.431417
GSM2370103	0.0223563	0	0	0.00549038	0.0504373	0	0	0	0.0250956	0	0.0469757	0	0.29678	0.0388345	0	0	0	0.00200085	0	0.0755909	0	0.436438
GSM2370105	0.0447761	0	0	0.105869	0.124135	0.0225439	0.0499446	0	0	0	0.227937	0	0.254156	0.0056962	0	0	0	0.00141927	0.00533509	0	0.051001	0.107187
GSM2370107	0	0.00159345	0	0.0700172	0.0647726	0	0.0222701	0	0.0144313	0	0.177556	0	0.402985	0	0	0	0	0.00949003	0	0	0.0125351	0.224348
GSM2370109	0.00558043	0	0	0.196666	0.0824743	0	0.0264655	0	0.0398245	0	0.175009	0	0.245222	0.0181262	0	0	0	0.00328229	0.00706029	0.00458386	0	0.195707
GSM2370111	0	0.00795693	0	0.184754	0.00403161	0	0.0521342	0	0.0192568	0	0.166814	0	0.427232	0.0330906	0	0	0	0.00188685	0	0.0100622	0	0.0927796
GSM2370113	0.020023	0	0	0.379036	0	0	0.0413291	0	0.0173364	0	0.229954	0.0366956	0.223967	0.0148011	0	0	0	0.0077344	0.0155352	0	0	0.0135888
GSM2370115	0	0.00342346	0	0.401651	0	0	0.0103814	0	0.0277197	0	0.275427	0.00845885	0.197547	0.00798895	0	0.0053554	0	0.00262947	0	0.0146168	0	0.0447999
GSM2370195	0	0.000424505	0	0.085325	0.0948335	0	0.0245284	0	0.00646726	0	0.132174	0	0.203261	0.0328443	0	0	0	0.00147965	0	0.00481363	0	0.413849
GSM2370197	0.000622706	0	0	0	0.0573177	0	0	0	0	0.000803091	0.0215575	0	0.331574	0.0851896	0	0	0	0.0055213	0	0.0494606	0	0.447953
GSM2370199	0.017505	0	0	0.0128723	0.0428847	0	0.00333007	0	0.00716624	0	0.0267259	0.0147811	0.274311	0.0925117	0	0	0	0.000157446	0	0.0502661	0	0.457488
GSM2370201	0	0.00180982	0	0.164931	0.0615937	0	0.011077	0	0.0218881	0	0.0958968	0	0.369437	0.0247841	0	0	0	0.00546633	0.00329655	0	0.0148916	0.224928
GSM2370203	0	0.0334701	0.0133829	0.176527	0.199448	0.0329337	0.0494202	0	0.0640651	0	0.125411	0	0.198352	0.0197212	0.00179696	0	0	0.0109728	0	0	0	0.0745001
GSM2370241	0.0164902	0	0	0	0.110596	0	0	0	0.00179969	0.030126	0.0685836	0	0.192722	0.0529489	0	0	0	0.0120499	0	0.12507	0	0.389614
GSM2370243	0	0.00463705	0	0.00981208	0.0662315	0	0.0120115	0	0.00341711	0	0.0506786	0	0.404332	0.0138007	0	0	0	0.00453308	0	0.0214622	0	0.409084
GSM2370245	0	0	0	0.214391	0.0156168	0	0.0526552	0	0.0509328	0	0.175023	0	0.343455	0.0229383	0	0	0	0.00900299	0	0.00168112	0.0248899	0.0894142
GSM2370247	0	0.00358175	0	0.130144	0.0169745	0	0.0559041	0	0	0.00321995	0.0802724	0	0.491624	0	0	0	0	0.00523874	0	0.0175585	0	0.195482
GSM2370273	0.000895385	0.00298466	0.0174698	0.0793882	0.135579	0	0.060788	0	0	0	0.0304393	0.0323588	0.185027	0.0205873	0	0	0	0.00251972	0.0095729	0	0	0.42239
GSM2370275	0.00507493	0.00481843	0	0.19823	0.110649	0	0.08894	0	0.00374155	0	0.0794592	0.0145774	0.193881	0	0	0.00527413	0	0.00140806	0	0.000780309	0	0.293165
GSM2370277	0	0.0344332	0	0.111509	0.136734	0	0.020515	0	0.00775045	0	0.039793	0.00356217	0.175724	0.0187038	0	0	0	0.0034677	0.00258658	0	0	0.445221
GSM2370285	0.0252834	0	0	0.153755	0.0744871	0	0.0291371	0	0.0388214	0	0.166554	0	0.281927	0.0501879	0	0	0	0	0	0	0	0.179847
GSM2370287	0.0184521	0	0	0.174705	0.102554	0	0.0318961	0	0	0	0.117711	0	0.380458	0.00597462	0	0	0	0.00700167	0.00118048	0	0	0.160066
GSM2370289	0.0269769	0.00399526	0	0.315445	0.0605366	0	0.0784918	0	0	0	0.0426054	0.0709625	0.292708	0.00187212	0	0.0165925	0	0.000149969	0.0196621	0	0	0.0700016
GSM2370291	0.00973305	0.0154057	0	0.173659	0.0755534	0.0262848	0.0316181	0	0.0581021	0	0.108435	0	0.390874	0.0343064	0	0	0	0.00475084	0	0	0	0.0712772
GSM2370293	0.0018072	0.00324464	0	0.0813541	0.0728496	0	0.0323674	0	0.0124168	0	0.0795397	0	0.352838	0.0677357	0	0	0	0	0	0.0129273	0.00560365	0.277316
GSM2370295	0.00536758	0	0	0.0547206	0.0370248	0.0452376	0.046939	0	0	0	0.0423326	0	0.286102	0	0	0	0	0.00702476	0.0152305	0	0	0.46002
GSM2370297	0	0.0105131	0	0.10101	0.045759	0	0.0410111	0	0.0148898	0	0.0608997	0	0.348724	0.043439	0	0	0	0.00154621	0.00711345	0	0.000729932	0.324364
GSM2370299	0	0.00364961	0	0.12316	0.0208877	0	0.0660195	0	0	0	0.0800976	0	0.304488	0.0233876	0	0	0	0	0	0.00635754	0	0.371953
GSM2370301	0.00474517	0	0.00536445	0.118396	0.0245418	0	0.00933612	0	0.0508303	0	0.0734792	0	0.264747	0.0907713	0	0	0	0	0	0.0700485	0	0.28774
GSM2370303	0.00704599	0	0.00322305	0.0626523	0.0250131	0	0.0449037	0	0	0	0.113099	0	0.357643	0.0227901	0	0	0	0.00317209	0	0.0687414	0	0.291716
GSM2370305	0	0.00384699	0	0.121985	0.0592811	0	0.0334969	0	0.0296717	0	0.194576	0	0.250958	0.0508188	0	0	0	0	0	0.059718	0	0.195647
GSM2370307	0.00632587	0	0	0.133103	0.0383424	0	0.0360988	0	0	0	0.0695777	0	0.467977	0.0077383	0	0	0	0.00345444	0	0.0206051	0	0.216777
GSM2370309	0	0	0	0.0207139	0.0472479	0	0.0608061	0	0	0	0.119826	0	0.24305	0.0619835	0	0	0	0	0	0.0807003	0	0.365672
GSM2370311	0	0.00869594	0	0.0012992	0.0688597	0	0.0587075	0	0	0	0.0862038	0	0.384307	0.0552003	0	0	0	0.00659501	0	0.0436828	0	0.286449
GSM2370313	0	4.11467e-05	0	0.00852555	0.0494136	0	0.0435872	0	0	0	0.0400603	0.00353547	0.324008	0.0550385	0	0	0	0.00398995	0	0.0114525	0	0.460348
GSM2370315	0.0789208	0	0	0.23083	0.0802626	0	0.0246382	0	0.0390211	0	0.0948396	0.0133841	0.255338	0	0	0	0	0.00108456	0	0	0	0.181681
GSM2370317	0.0237982	0	0.00402264	0.134057	0.133337	0	0.0521305	0	0.0164953	0	0.14846	0	0.290084	0.0132979	0	0	0	0.00589161	0	0	0.00013647	0.17829
GSM2370319	0.0123889	0.000338366	0	0.110645	0.0583587	0	0.0251198	0	0.00899554	0	0.110221	0	0.273146	0.0361019	0	0	0	0	0	0.00700123	0	0.357683
GSM2370321	0.0138644	0.00104824	0.040705	0.0637381	0.0930527	0.0154767	0.0252305	0	0	0	0.108136	0	0.226754	0.0238284	0	0	0	0.0005468	0	0.00676053	0	0.380858
GSM2370323	0.0227138	0	0	0.0605246	0.0873572	0.0383032	0.0166304	0	0.00951883	0	0.149038	0	0.216285	0.0366615	0	0	0	0.00092859	0	0.017178	0	0.34486
GSM2370325	0.0190009	0.000696229	0	0.0427079	0.0691329	0.0924211	0.0222471	0	0.00237738	0	0.100264	0	0.299032	0.0458169	0	0	0	0.00141492	0	4.26138e-05	0	0.304846
GSM2370327	0.00518085	0.00738168	0	0.401766	0.044929	0	0.0432946	0	0	0	0.123229	0.00884052	0.130711	0	0	0.0156403	0	0.00133247	0	0	0.0148714	0.202823
GSM2370329	0.0143604	0	0	0.310346	0.0442018	0	0.08805	0	0	0	0.0881239	0.00236635	0.124213	0	0	0.010237	0	0.00301754	0.00571969	0	0	0.309364
GSM2370331	0	0.0184176	0	0.328477	0.0233296	0	0.0734473	0	0.0128908	0	0.120832	0.019735	0.132568	0	0	0.00625903	0	0.000809676	0	0	0	0.263234
GSM2370333	0	0.0287846	0.00932457	0.350783	0.0794107	0	0.095198	0	0	0	0.137387	0	0.0799643	0	0	0.00940375	0	0.000887092	0.00378741	0	0	0.20507
GSM2370335	0.0383254	0	0	0.143681	0.0718045	0	0.0456248	0	0.0165108	0	0.127068	0	0.188892	0.00916106	0	0	0	0.00258509	0	0.00638264	0	0.349964
GSM2370337	0.0528103	0	0	0.0866894	0.11101	0	0.0141047	0	0.0723401	0	0.115525	0	0.245963	0.0247342	0	0	0	0.00117004	0	0.0100485	0	0.265605
GSM2370339	0.0484671	0	0	0.173481	0.0756635	0	0.0204555	0	0.0863438	0	0.23484	0	0.192529	0.00164496	0	0	0	0	0.000446331	0	0	0.166129
GSM2370341	0.0450541	0	0.0084517	0.145805	0.0785226	0.000547418	0.00772665	0	0.0698623	0	0.170397	0	0.24832	0.00344681	0	0	0	9.14168e-05	0	0.00286041	0	0.218914
GSM2370343	0.00144285	0	0	0.125198	0.00430597	0	0.0461662	0	0.0274381	0	0.0880299	0.00853535	0.307916	0.0500348	0	0	0	0.000561662	0	0.0326539	0	0.307717
GSM2370345	0	0	0	0.113373	0.0177947	0	0.056282	0	0.00344249	0	0.123864	0	0.269769	0.0387912	0	0	0	0	0	0.0024159	0	0.374267
GSM2370347	0.0320275	0	0.00188254	0.372564	0.133351	0.113794	0.045317	0	0	0	0.00509843	0.0286269	0.163443	0	0	0.00484799	0	0.00243608	0.00366315	0	0	0.0929489
GSM2370349	0.025856	0	0	0.401901	0.0367414	0.017652	0.0591068	0	0.0475828	0	0.154272	0	0.158946	0	0	0.0011243	0	0.000526802	0.000144539	0	0	0.0961476
GSM2370351	0.0410454	0	0	0.151425	0.0641165	0	0.0252509	0	0.0638776	0	0.0943695	0.00634399	0.288073	0.0237638	0	0	0	0.00910127	0	0	0	0.232633
GSM2370353	0.0087599	0.00920341	0.00219365	0.261244	0.123268	0.0531289	0.0527731	0	0.0206156	0	0.0762512	0.0168968	0.244535	0	0	0.00695484	0	0.00639795	0	0	0	0.117778
GSM2370355	0.0315297	0	0	0.101153	0.106748	0.0887659	0.0424937	0	0.0123394	0	0.187547	0	0.155168	0.0285627	0	0	0	0	0	0.00139261	0	0.244299
GSM2370357	0.024235	0	0	0.0683993	0.0840409	0.0157805	0.00438384	0	0.0282014	0	0.101562	0	0.201685	0.048503	0	0	0	0	0	0.0195941	0	0.403615
GSM2370359	0.0603082	0	0	0.166555	0.100112	0.0282142	0.033828	0	0.0374735	0	0.110924	0	0.109422	0	0	0	0	0.00155758	0	0	0	0.351604
GSM2370361	0.0236699	0.00104813	0	0.143537	0.107824	0.00735913	0.00882326	0	0.064878	0	0.133462	0	0.14985	0.0459928	0	0	0	0.000858148	0	0	0	0.312697
GSM2370363	0.0102956	0	0	0.0969063	0.040131	0	0.0513153	0	0	0	0.139965	0	0.217436	0.0373908	0	0	0	0	0	0	0	0.40656
GSM2370365	0.00606588	0.00113214	0	0.0586274	0.062971	0.00843743	0.0230588	0	0	0	0.119103	0	0.204773	0.0384981	0	0	0	0.000520128	0	0.0328528	0	0.44396
GSM2370367	0.00855553	0.00182062	0	0.260749	0.0366568	0	0.0257576	0	0.0368188	0	0.22157	0	0.172872	0.0205307	0	0	0	0	0	0.00448538	0	0.210184
GSM2370369	0.0121648	0	0	0.112631	0.0596908	0	0.024314	0	0	0	0.0385796	0.008584	0.208519	0.036729	0	0	0	0	0	0.00669744	0	0.492091
GSM2370371	0.0163226	0	0.0139381	0.0013077	0.0834765	0	0.0249671	0	0	0.0313282	0.0436506	0	0.233613	0.0382726	0	0	0	0.00782584	0	0.0438617	0	0.461436
GSM2370373	0.0565455	0	0	0.189135	0.131778	0	0.0205582	0	0.0140269	0	0.154355	0	0.153295	0	0	0	0	0.00452518	0	0.00665585	0	0.269125
GSM2370375	0.0232264	0	0	0.0814048	0.0578055	0	0.00102219	0	0.0178981	0	0.0521436	0.0148753	0.222885	0	0	0	0	0.0053058	0	0.00608655	0	0.517347
GSM2370377	0.0512178	0	0.022584	0.187751	0.0947543	0	0.0633629	0	0	0	0.0746026	0	0.10655	0.0205868	0	0.00238906	0	0.00326362	0	0.00286871	0	0.37007
GSM2370379	0.0149242	0.00264755	0	0.135802	0.0937449	0.0112746	0.051112	0	0	0	0.0752297	0	0.193629	0	0	0	0	0.00452999	0	0	0	0.417106
GSM2370381	0.0276587	0.000474858	0	0.0894744	0.0535796	0.0424522	0.00892564	0	0.00993873	0	0.0743525	0	0.341704	0.0223722	0	0	0	0.00681199	0.00383438	0	0	0.318421
GSM2370383	0.0265294	0.0164518	0	0.110719	0.10659	0.00160801	0.0026733	0	0	0	0.0389871	0.0102791	0.395633	0.0185141	0	0	0	0.0113203	0	0.0128778	0	0.247817
GSM2370385	0.0893898	0	0	0.0592047	0.0598977	0.0319373	0.0280548	0	0	0	0.0707603	0	0.292848	0.00738143	0	0	0	0.00786901	0.00459226	0	0	0.348065
GSM2370387	0.00635792	0.00394965	0	0.0687914	0.0385458	0	0	0	0.0224249	0	0.0500011	0	0.381579	0.0357444	0	0	0	0.00658285	0	0.0328839	0	0.35314
GSM2370389	0.00351045	0	0	0.121605	0.129358	0	0.0250181	0	0.0215215	0	0.138093	0	0.275513	0.00593095	0	0	0	0.0056796	0	0.029724	0	0.244047
GSM2370391	0.0134663	0	0	0.110359	0.0471451	0	0.0455062	0	0.0191818	0	0.183603	0	0.244429	0.0810843	0	0.00746727	0	0	0	0.0427249	0	0.205033
GSM2370393	0	0.00919591	0	0.132426	0.0779011	0.0324564	0.0527806	0	0	0	0.133611	0	0.264209	0.0181975	0	0.0015895	0	0.00239513	0	0	0	0.275238
GSM2370395	0	0.00575606	0	0.123426	0.0914003	0.00994736	0.0705619	0	0.00339225	0	0.233029	0	0.182765	0.0448477	0	0	0	0.00139288	0	0.0104397	0	0.223042
GSM2370397	0.00260046	0	0	0.00674021	0.108602	0.00561522	0.0227139	0	0	0	0.0477581	0	0.349801	0.0532224	0	0	0	0.00139627	0	0.00152629	0	0.400024
GSM2370399	0.0168099	0	0	0.00426513	0.114764	0.0213118	0.0120378	0	0.00264827	0	0.0451515	0	0.355039	0.0275274	0	0	0	0.00472726	0	0.0171687	0	0.37855
GSM2370401	0.0299039	0	0	0.0641212	0.1332	0	0.00696579	0	0.114821	0	0.157784	0	0.312173	0.0380194	0	0	0	0.00728688	0.00116722	0	0	0.134558
GSM2370403	0.00264684	0	0	0.0472639	0.0722129	0	0.00591995	0	0.0334999	0	0.0653098	0	0.399674	0.0045821	0	0	0	0.000518842	0	0.00702258	0	0.361349
GSM2370405	0.00490647	0	0	0.0975766	0.0246585	0	0.0111622	0	0.0163148	0	0.112539	0	0.187671	0.0413768	0	0	0	0	0	0.0113016	0	0.492493
GSM2370407	0.0151706	0	0.000106967	0.0663788	0.0744802	0	0.0204856	0	0.00763076	0	0.0444952	0.0145959	0.366437	0	0	0	0	0.00239019	0	0.000691966	0	0.387137
GSM2370409	0.0376746	0	0	0.154241	0.0252188	0	0.055841	0	0.0238359	0	0.156919	0	0.221632	0.0138767	0	0	0	0	0.00257696	0	0	0.308184
GSM2370411	0.00821267	0	0	0.11791	0.0470064	0	0.0173901	0	0.030463	0	0.101392	0	0.263419	0	0	0	0	0.0036421	0	0.00726839	0	0.403297
GSM2370413	0	0.0276013	0	0.131378	0.207915	0	0.0326276	0	0.0553898	0	0.1273	0	0.270246	0.0143658	0	0	0	0.00845193	0	0.00827691	0	0.116449
GSM2370415	0.0374693	0	0	0.0132846	0.0524475	0	0	0	0.0264447	0	0.0553033	0	0.206751	0.0457144	0	0	0	0.00109272	0	0.0895808	0	0.471912
GSM2370417	0.0365376	0	0	0.097935	0.0796706	0	0.0225508	0	0.0168376	0	0.137523	0	0.3516	0.014158	0	0	0	0.000729393	0	0.0160314	0	0.226426
GSM2370419	0.0148966	0	0	0.0765631	0.0531607	0	0.00923242	0	0	0	0.178775	0	0.262629	0.0370213	0	0	0	0	0	0.0162175	0	0.351505
GSM2370421	0.0186387	0	0	0.25909	0.0110897	0	0.0373511	0	0.0618117	0	0.0868303	0	0.243424	0	0	0	0	0.00417992	0	0	0	0.277584
GSM2370423	0	0.00402419	0	0.117419	0.132534	0	0.0382946	0	0.0115078	0	0.111161	0	0.204017	0.0112287	0	0	0	0.00135872	0.00517058	0	0	0.363284
GSM2370425	0.00644423	0.00396281	0	0.223991	0.0643359	0	0.0575988	0	0	0	0.150518	0	0.157829	0	0	0	0	0.00251771	0	0	0	0.332802
GSM2370427	0.0405957	0	0	0.13333	0.0161969	0	0.0336999	0	0.0543783	0	0.185361	0	0.2402	0.0769908	0	0	0	0	0	0.022089	0	0.197158
GSM2370429	0.0211981	0.00168703	0	0.175616	0.0686214	0	0.0477606	0	0.0202952	0	0.17745	0	0.197295	0	0	0	0	0.00116855	0	0	0	0.288908
GSM2370431	7.20972e-05	0.0122454	0	0.124916	0.0760258	0.0220195	0.0254851	0	0	0	0.108104	0.0120663	0.209663	0	0	0	0	0.00209224	0	0	0	0.40731
GSM2370433	0.00235273	0.00573557	0	0.0268233	0.0362357	0.0423563	0.0256128	0	0.0197493	0	0.0916882	0	0.514733	0.0024899	0	0	0	0.00556461	0	0.0027506	0	0.223908
GSM2370435	0	0.00931323	0	0.0166092	0.0673884	0.0463847	0.0894263	0	0	0.00312495	0.0775982	0	0.385555	0	0	0	0	0.00721741	0	0	0	0.297383
GSM2370437	0.0121323	0.00519094	0	0.08148	0.110029	0.0559161	0.0422782	0	0	0	0.0566707	0	0.282445	0	0	0	0	0.00798897	0.021158	0	0	0.324711
GSM2370439	0.00468673	0	0	0.0236162	0.0570795	0.0144237	0.0285565	0	0	0.0116966	0.0554436	0	0.223938	0.0208258	0	0	0	0.00111093	0.0038836	0	0	0.554739
GSM2370441	0	0.00277825	0	0.141427	0.0218111	0.00474717	0.0383658	0	0.0120876	0	0.117872	0	0.242319	0.0400691	0	0	0	0	0	0.0145132	0	0.36401
GSM2370443	0	0.00313916	0	0.011134	0.120869	0.104616	0.0382464	0	0	0.0291747	0.129305	0	0.191414	0	0	0	0	0.00357753	0.000325444	0	0	0.3682
GSM2370445	0	0.00075479	0	0.0841289	0.0915885	0	0.0287545	0	0	0	0.153405	0	0.245892	0	0	0	0	0.00122991	0.00354705	0	0	0.390699
GSM2370447	0.00734069	0.0101752	0	0.0710359	0.139394	0.0406448	0.0357583	0	0	0	0.0680263	0	0.148714	0.0322354	0	0	0	0	0	0.0136671	0	0.433008
GSM2370449	0.00681909	0.00434211	0.0221457	0.0520421	0.135528	0.0801466	0.0345372	0	0	0.020774	0.0348723	0	0.150432	0	0	0	0	0.00257531	0	0	0	0.455786
GSM2370451	0.0189429	0.010422	0	0.0225032	0.196519	0.0542799	0.0684475	0	0	0	0.0781037	0	0.147102	0	0	0	0	0.00335524	0	0	0	0.400324
GSM2370453	0.0123389	0.0148482	0	0.0977955	0.275254	0.0197904	0.0490524	0	0	0.0222013	0.0676319	0	0.196021	0	0	0	0	0.0011845	0.00209599	0	0.00992417	0.231862
GSM2370455	0.00273776	0.00673463	0.00503777	0.0077267	0.1737	0.167295	0.0325402	0	0	0	0.0572522	0.0287873	0.257823	0	0	0	0	0.00248202	0.0222672	0	0	0.235617
GSM2370457	0	0.00798593	0.0162827	0	0.113259	0.0131591	0.0418191	0	0	0.0161815	0.0925402	0	0.239547	0.00956141	0	0	0	0.00187386	0	0.0230557	0	0.424734
GSM2370459	0.0233258	0	0.000204612	0	0.131439	0.0557893	0.0162783	0	0.0192456	0	0.0978999	0.016771	0.225093	0.00709496	0	0	0	0.000779575	0.00839854	0	0	0.39768
GSM2370461	0	0.00707503	0	0	0.105866	0.0279249	0.0253703	0	0.00080387	0	0.0510672	0	0.330671	0	0	0	0	0.00362952	0.00636134	0	0	0.44123
GSM2370463	0.0075685	0	0	0.124101	0.107742	0.00675576	0.0430081	0	0	0	0.174753	0	0.238155	0	0	0.00843238	0	0.00328118	0.0210989	0	0	0.265104
GSM2370465	0.000180955	0	0	0.0141869	0.0540064	0.0127136	0.0375324	0	0	0.0212853	0.0753871	0	0.341248	0	0	0	0	0.0124776	0	0.0258544	0	0.405127
GSM2370467	0.0158717	0	0	0.0671652	0.0539786	0.0352836	0.0233097	0	0	0	0.09121	0.00878557	0.362007	0	0	0.0132698	0	0.00322777	0.00274051	0	0	0.32315
GSM2370469	0.00608668	0.00192029	0	0.112535	0.109235	0	0.00751875	0	0.0397165	0	0.135767	2.06731e-05	0.247115	0.00459764	0	0	0	0.00148611	0	0.00381072	0	0.33019
GSM2370471	0	0	0	0.10439	0.152924	0	0.0513513	0	0	0	0.0442302	0.0215173	0.187934	0.00968126	0	0	0	0.00783402	0.00499271	0	0	0.415145
GSM2370473	0	0.00479648	0.00903564	0.0880078	0.10146	0	0.0441547	0	0	0	0.118879	0	0.213733	0.0382466	0	0	0	0.00787618	0	0.00583859	0	0.367972
GSM2370475	0	0.00034056	0	0.0518788	0.0848493	0	0.0470124	0	0.00196805	0	0.117658	0	0.135817	0.0275338	0	0	0	0.00478285	0	0.075969	0	0.452191
GSM2370477	0	0.00175829	0	0.109542	0.101112	0	0.0313468	0	0.0113962	0	0.0764576	0	0.196665	0.038997	0	0	0	0.00307774	0	0.0322069	0	0.39744
GSM2370479	0.016155	0	0	0.118351	0.046135	0	0.0242552	0	0.00134566	0	0.205579	0	0.189213	0.0352215	0	0	0	0.00322133	0	0.0112544	0	0.349269
GSM2370481	0.0205429	0	0	0.0716522	0.00860762	0	0.0646936	0	0	0	0.256433	0	0.24059	0.0200148	0	0	0	0.00502097	0	0.0142675	0	0.298178
GSM2370483	0.026434	0	0	0.387699	0	0	0.0690677	0	0.0461766	0	0.249968	0	0.136449	0.00959604	0	0	0	0	0	0.00383609	0	0.0707738
GSM2370485	0.0144321	0	0	0.200785	0.0516501	0	0.0692775	0	0	0	0.141182	0.0863872	0.176909	0	0	0	0	0.00386888	0	0	0	0.255508
GSM2370487	0.00426756	0	0	0.0884928	0.188994	0.00467826	0.0202671	0	0.0554375	0	0.1231	0	0.241125	0.0368947	0	0	0	0.00832513	0	0	0	0.228418
GSM2370489	0	0.00269966	0	0.179037	0.0557815	0	0.0175137	0	0.0397758	0	0.112593	0	0.242196	0.0300831	0	0	0	0.00341643	0	0.00532635	0	0.311578
GSM2370491	0.00391745	0.00235252	0	0.159249	0.150079	0.0364353	0.0189247	0	0.0259023	0	0.0864063	0	0.209539	0	0	0	0	0.00387183	0	0	0	0.303322
GSM2370493	0	0	0.0207527	0.335897	0.310383	0.111986	0.0353725	0	0.0311132	0	0.0326708	0.0274545	0.0513816	0.012317	0	0	0	0.0048956	0.00584055	0	0.0199362	0
GSM2370495	0.000157638	0	0	0.0498008	0.0592528	0	0.0153148	0	0	0	0.0403975	0	0.362084	0.0130975	0	0	0	0.00353954	0	0.057445	0	0.39891
GSM2370497	0.0264367	0	0.00305923	0.0183127	0.0691845	0	0.0119613	0	0	0.0284271	0.0299185	0	0.338772	0.019887	0	0	0	0.0030264	0	0.0474558	0	0.403558
GSM2370499	0.0056935	0.00765759	0	0.0924117	0.100938	0.00877505	0.0487622	0	0	0	0.169549	0	0.25379	0.0107395	0	0	0	0.000652958	0	0.0123066	0	0.288724
GSM2370501	0	0.00429982	0	0.0507981	0.10839	0	0.0157769	0	0	0.00542233	0.066554	0	0.415371	0.0253607	0	0	0	0.00285005	0	0.00649251	0	0.298685
GSM2370503	0.0185522	0.00269214	0.00258471	0.0753626	0.162315	0.00475806	0.013808	0	0.0141682	0	0.0734351	0	0.357918	0.0189928	0	0	0	0.00767661	0.0201355	0	0	0.227602
GSM2370505	0.00836111	0.00586193	0	0.0419972	0.0915811	0	0.0148434	0	0	0	0.0501266	0	0.3258	0.0129397	0	0	0	0.00310889	0.000608127	0.00252305	0	0.442249
GSM2370507	0.0510772	0	0	0.0111187	0.0546578	0	0	0	0.00857216	0	0.0334737	0	0.275198	0.0334559	0	0	0	0	0	0.0122253	0	0.520221
GSM2370509	0.0153328	0.018775	0	0.0950805	0.0806899	0.0282648	0.0183437	0	0.0058243	0	0.0462983	0	0.350871	0	0	0	0	0.00191084	0.018657	0	0	0.319952
GSM2370511	0.00181011	0	0	0.1046	0.0542983	0	0.0416128	0	0	0.0122567	0.0156595	0	0.255051	0	0	0	0	0.00689221	0	0.00710559	0	0.500714
GSM2370513	0.0089403	0	0	0.122984	0.0306238	0	0.0394564	0	0	0	0.0465584	0	0.370716	0.031024	0	0	0	0.00279738	0	0.0315722	0	0.315327
GSM2370515	0.0415325	0	0	0.256393	0	0	0.0400075	0	0.043989	0	0.194599	0	0.171119	0.050891	0	0	0	0	0	0.016205	0	0.185265
GSM2370517	0.00264301	0	0	0.157149	0.0199239	0	0.0458172	0	0	0	0.0162233	0.00752013	0.290525	0	0	0	0	0.00225588	0	0	0	0.457942
GSM2370519	0.0176837	0	0	0.100469	0.104935	0	0.0264347	0	0.0179609	0	0.172606	0	0.226656	0.0336376	0	0	0	0.00136208	0	0.000161678	0	0.298093
GSM2370521	0.0277074	0	0	0.0544049	0.0673332	0	0.0137494	0	0.00754134	0	0.0822141	0	0.352568	0.0368534	0	0	0	0.00376373	0	0.018783	0	0.335082
GSM2370523	0.043494	0	0	0.237479	0.0363895	0	0	0	0.049786	0	0.209073	0.0115518	0.234392	0.0198776	0	0	0	0.000284336	0	0.00233906	0	0.155333
GSM2370525	0.0149379	0	0.000354205	0.102078	0.0254854	0.0237414	0.0332736	0	0	0	0.135138	0	0.188745	0.0100814	0	0	0	0.00319037	0	0.0284843	0	0.434491
GSM2370527	0.012983	0	0.00496461	0.0531473	0.0630123	0.0114921	0.0315935	0	0	0	0.0521399	0	0.258477	0.0276852	0	0	0	0.0114193	0	0.0179367	0	0.455149
GSM2370529	0.0770837	0	0	0.187255	0.115769	0.0329147	0.0331699	0	0	0	0.170804	0.0130304	0.237173	0	0	0.0204193	0	0.00264202	0	0	0	0.109739
GSM2370531	0.0203307	0	0.00237859	0.103041	0.0646663	0.00598881	0.0189615	0	0	0	0.102333	0	0.306434	0	0	0	0	0.00275851	0.00898982	0	0	0.364117
GSM2370533	0.0391676	0	0.0274695	0.0138727	0.0810619	0.0590876	0.0101881	0	0	0	0.0257278	0	0.284332	0.000153116	0	0	0	0.00386786	0	0.000200982	0	0.454871
GSM2370535	0.04716	0	0.0221309	0.111635	0.150446	0.00121706	0.0269049	0	0.023615	0	0.159086	0	0.211574	0	0	0	0	0.00347182	0.00682711	0	0	0.235933
GSM2370537	0.00566037	0	0.000404519	0.145665	0.180062	0	0.077868	0	0.0263413	0	0.162432	0.00628505	0.180732	0.00122881	0	0	0	0.00752283	0	0	0	0.205798
GSM2370539	0.0129435	0	1.82594e-05	0.125761	0.168309	0	0.102624	0	0	0	0.170384	0	0.152228	0	0	0.000459847	0	0.00392637	0	0	0	0.263345
GSM2370541	0.0152472	0.00623042	0	0.0445833	0.170279	0	0.0351196	0	0.0577883	0	0.143336	0	0.333204	0.00550759	0	0	0	0.0125209	0	0.000471868	0	0.175711
GSM2370543	0.0131557	0	0	0.200662	0.127744	0	0.0830124	0	0.0445191	0	0.301303	0	0.150446	0.00327788	0	0	0	0.000465095	0	0	0	0.0754144
GSM2370545	0.0483896	0.0206275	0.0193642	0.0508841	0.235116	0.203149	1.76227e-05	0	0.021497	0	0.0920292	0.00427651	0.134405	0	0	0	0	0.00214874	0.00930038	0	0	0.158795
GSM2370547	0.022713	0	0.00776747	0.0198306	0.140079	0.0310003	0.0055423	0	0.0655436	0	0.191632	0	0.145323	0.0398277	0	0	0	0	0	0.041977	0	0.288764
GSM2370549	0.0587077	0.0454439	0.000559852	0.219862	0.208105	0.0581908	0.0317134	0	0	0	0.114282	0	0.0907823	0	0	0.0139356	0	0.00235666	0	0	0	0.15606
GSM2370551	0.0208445	0.0196772	0.0172086	0.0695749	0.249814	0.119191	0	0	0.0309828	0	0.134206	0	0.158972	0.0150902	0	0	0	0	0.00263516	0	0.00341119	0.158393
GSM2370553	0.0171056	0	0.00365128	0.112182	0.0375867	0.0316792	0.0364559	0	0	0.0197717	0.0675046	0	0.194371	0	0	0	0	0.0046537	0.000678856	0	0	0.474359
GSM2370555	0.0354486	0	0.00766868	0.130654	0.111668	0	0.00567219	0	0.0154076	0	0.0831797	0	0.250113	0.00319704	0	0	0	0.00809675	0	0	0	0.348895
GSM2370557	0.0177702	0.00367232	0	0.148649	0.0706463	0	0.00645439	0	0.0281278	0	0.099659	0	0.238857	0.032623	0	0	0	0.00105137	0	0.00999406	0	0.342495
GSM2370559	0.00364449	0	0	0.0807779	0.0502851	0	0.00962364	0	0.044045	0.00134543	0.0366144	0.000717067	0.253888	0.0103774	0.00420536	0	0.00334823	0.00943099	0	0.0481635	0	0.443534
GSM2370561	0	0.000417783	0	0.101897	0.0297428	0	0.0403937	0	0	0	0.180218	0	0.247936	0.0136735	0	0	0	0.00294985	0	0.0182853	0	0.364485
GSM2370563	0.00616451	0	0	0.00429199	0.0311625	0	0	0	0	0	0.0329158	0.00640631	0.231929	0.0367162	0	0	0	0.00284121	0	0.0794687	0	0.568104
GSM2370565	0.00635891	0	0	0.140221	0.0044637	0	0.0754297	0	0.0349607	0	0.227029	0.0156082	0.158769	0.0289051	0	0	0	0	0	0.0212153	0	0.28704
GSM2370567	0	0	0	0.133855	0.0259709	0	0.0680488	0	0.00911243	0	0.221906	0	0.171311	0.019379	0	0	0	0	0	0.0263496	0	0.324066
GSM2370569	0	0.000988273	0	0.0631543	0.0616594	0	0.0217927	0	0	0	0.0700783	0	0.323357	0.0518679	0	0	0	0	0	0.0367806	0	0.370322
GSM2370571	0.00228404	0	0	0.0496163	0.0265445	0	0.00210258	0	0.012974	0	0.0434885	0.00152115	0.287243	0.069789	0	0	0	0	0	0.0498061	0	0.45463
GSM2370573	0.0288488	0	0	0.0759009	0.122658	0.00497287	0.0181834	0	0.00836899	0	0.160886	0.0232325	0.309767	0	0	0	0	0.00302801	0.00217074	0	0	0.241982
GSM2370575	0.000798134	0	0	0.0581656	0.0429735	0	0.00543224	0	0.00974222	0	0.0894922	0.0181442	0.279928	0.0542067	0	0	0	0	0	0.0211839	0	0.419933
GSM2370577	0	0.0106748	0	0.123247	0.0702126	0	0.065348	0	0	0	0.157398	0	0.151739	0.0322116	0	0	0	0	0.00197453	0	0	0.387195
GSM2370579	0.0125778	0.000932857	0	0.163804	0.0920083	0	0.0281602	0	0.0144445	0	0.118509	0	0.189938	0.0224785	0	0	0	0.00196923	0	0.0186513	0	0.336527
GSM2370581	0.00357811	0.00226548	0	0.118982	0.102883	0	0.0461297	0	0	0	0.148587	0	0.235457	0.0086976	0	0.00976297	0	0.00283356	0	0.00283452	0	0.31799
GSM2370583	0.00217583	0.00413512	0	0.158187	0.0987422	0.00872771	0.0110763	0	0.011452	0	0.11681	0	0.243261	0.0195851	0	0	0	0	0	0	0	0.325847
GSM2370585	0.000631244	0	0	0.0750735	0.09235	0.0574284	0.025083	0	0	0	0.119229	0	0.192201	0.0203053	0	0	0	0.00268624	0	0.0122089	0	0.402804
GSM2370587	0	0	0	0.0772486	0.0134928	0	0.00550984	0	0.000467961	0	0.0637892	0.0238843	0.41283	0.0315489	0	0	0	0.000646956	0	0.00085402	0	0.369727
GSM2370589	0.00149717	0	0	0.101468	0.0485975	0.0161186	0	0	0	0.00231913	0.0124288	0.111842	0.216137	0.0153246	0	0	0	0.000144641	0	0.000905822	0	0.473217
GSM2370591	0	0.000331098	0	0.0591017	0.0281358	0.0118725	0.0107052	0	0.00444339	0	0.145818	0	0.278051	0.0101801	0	0	0	0.00137827	0	0	0	0.449983
GSM2370593	0.00356218	0.000503931	0	0.188226	0.0331338	0.0516468	0.0430304	0	0.00949533	0	0.18873	0	0.188055	0.0306878	0	0	0	0	0.00310224	0	0	0.259826
GSM2370595	0.0336094	0	0	0.0684882	0.0366645	0.0104367	0.0367522	0	0	0	0.0446318	0.015598	0.0794658	0.0145294	0	0.00649524	0	0.00280177	0	0	0	0.650527
GSM2370597	0	0.0120404	0	0.157152	0.0209675	0.000596251	0	0	0.00697689	0	0.0459449	0.0721918	0.178252	0.02075	0	0.0164509	0	0.0033009	0	0.0147267	0	0.45065
GSM2370599	0	0.00757939	0	0.107306	0.0224842	0.088457	0.0245803	0	0.00958981	0	0.13728	0	0.260694	0.0223632	0	0	0	0.000678047	0	0	0.0314107	0.287577
GSM2370601	0.002318	0	0	0.200833	0.0251799	0	0.016676	0	0.035295	0	0.0770815	0.0114368	0.187333	0.070968	0	0	0	0	0	0	0	0.372879
GSM2370603	0.00742611	0	0	0.160429	0.0468928	0	0	0	0.0585391	0	0.0987793	0.000788583	0.268987	0.0746571	0	0	0	0	0	0.0367432	0	0.246757
GSM2370605	0	0.00808362	0	0.26839	0.120742	0	0.0591881	0	0.0179199	0	0.0771825	0	0.170798	0.00171842	0	0	0	0	0.00685251	0	0	0.269125
GSM2370607	0	0.00909573	0	0.229266	0.0825988	0	0.0469886	0	0.0118016	0	0.174841	0	0.112468	0.0272258	0	0	0	0	0	0	0	0.305715
GSM2370609	0.0530946	0	0	0.0574675	0.089133	0	0.0403261	0	0.0071085	0	0.106192	0	0.31645	0.0258508	0	0	0	0.00921929	0	0.000580111	0	0.294578
GSM2370611	0.037729	0	0.000961666	0.0304287	0.0756761	0	0.0268372	0	0	0	0.0688572	0	0.327769	0	0	0	0	0.00707429	0	0.0250746	0	0.399592
GSM2370613	0.0819966	0	0	0.172331	0.125909	0	0.077757	0	0.018012	0	0.141357	0	0.254256	0.00720967	0	0	0.00512877	0.00689239	0.00398502	0	0	0.105166
GSM2370615	0.0424976	0	0	0.113835	0.0802591	0	0.0464898	0	0.0052099	0	0.0819006	0	0.336608	0	0	0	0	0.0023414	0.00449762	0	0	0.28636
GSM2475317	0	0.0639069	0	0.149922	0.144957	0.0410439	0	0	0.0225369	0	0	0.0802232	0.0914655	0	0	0.0458728	0	0.0122851	0.024823	0	0.00127412	0.32169
GSM2475318	0	0.0711545	0	0.0574958	0.129374	0.079086	0	0	0.0271669	0	0.00645779	0.0634304	0.27745	0	0	0	0	0.0143491	0	0.0350238	0	0.239012
GSM2475323	0	0.0330065	0.0141814	0.0435112	0.0790478	0.0500891	0	0	0.0140675	0	0	0.0730449	0.338915	0.000252718	0	0	0	0.00342199	0	0.0170646	0	0.333397
GSM2475328	0	0.0690437	0	0.0289554	0.109824	0.0116299	0	0	0.0361708	0	0	0.0448321	0.398474	0.0190727	0	0	0	0.01194	0.0144173	0	0	0.25564
GSM2475330	0	0.0719915	0	0.0930803	0.0919793	0	0.000486981	0	0.0576623	0	0.00513165	0.0673772	0.442191	0	4.68393e-05	0	0	0.0141988	0.000289923	0.00525004	0	0.150314
GSM2475337	0	0.0243788	0	0.08207	0.127801	0.00163295	0	0	0.089181	0	0	0.0708742	0.219309	0.0292573	0	0	0	0.00704658	0.0166992	0	0	0.33175
GSM2475339	0	0.0366696	0	0.146234	0.141827	0.00985008	0	0	0.0302817	0	0.0059757	0.140207	0.195024	0.00961416	0	0	0	0.0106229	0	0.0250333	0	0.248661
GSM2475345	0	0.0392056	0	0.0972412	0.150461	0	0	0	0.107481	0	0.0113851	0.080028	0.291353	0.0213849	0	0	0	0.00949978	0	0	0	0.191961
GSM2475352	0.0190606	0.0063439	0	0.027857	0.0750665	0	0	0	0.0717634	0	0.00163609	0.0502185	0.138075	0	0	0	0	0.0152855	0	0.0388298	0	0.555864
GSM2475358	0	0.0405949	0	0.148097	0.108052	0	0	0	0.128847	0	0.00174766	0.141047	0.2004	0.0187404	0	0	0	0.00886445	0	0.0186536	0	0.184957
GSM2475364	0.0116951	0.0316208	0.00271322	0.086475	0.111302	0.0251584	0.0267437	0	0.0459034	0	0.0717816	0.0485648	0.269694	0.0158818	0	0	0	0.00288147	0.00233413	0	0	0.247251
GSM2475366	0	0.046771	0	0.113526	0.0451981	0	0.00972168	0	0.121101	0	0.0549675	0.031827	0.296406	0.0557242	0.00445696	0	0	0	0	0.0219642	0	0.198335
GSM2475369	0	0.0754522	0	0.0907536	0.0281217	0.0622747	0	0	0.101766	0.00443535	0	0.159727	0.259023	0.0144222	0	0	0	0.0100029	0	0.0146868	0	0.179334
GSM2475376	0.000234633	0.031605	0.00455849	0.0943655	0.171143	0.0669985	0	0	0.105285	0	0.0560297	0.0609168	0.170244	0.0361217	0	0	0	0.00950704	0	0.0155529	0	0.177438
GSM2475378	0.0137998	0.0155624	0	0.145178	0.00126446	0.0592806	0	0	0.0642318	0	0	0.149566	0.28886	0.000239562	0	0	0	0.00273904	0	0.0197795	0	0.2395
GSM2475381	0	0.0577854	0	0.286809	0.106436	0	0	0	0.0281416	0	0	0.138612	0.240137	0	0	0	0	0.0106227	0.0198559	0	0	0.111601
GSM2475392	0	0	0	0.207373	0.0568538	0	0	0	0.0392746	0	0.0272156	0.117389	0.197606	0.0779235	0	0	0	0	0	0.0171189	0	0.259246
GSM2475394	0.00466377	0.0235312	0	0.214868	0.0503581	0	0	0	0.104935	0	0.0179287	0.120596	0.228834	0.0307709	0	0	0	0	0	0	0	0.203515
GSM2475398	0	0.0529801	0	0.130419	0.0970114	0.071079	0	0	0.0612167	0	0	0.0863703	0.192622	0.0168321	0	0	0	0.0115378	0.0361465	0	0	0.243785
GSM2475403	0	0.0354521	0	0.0691832	0.0897871	0	0	0	0.0711867	0	0.014078	0.0618358	0.179062	0.00435447	0	0	0	0.0102293	0	0.0440035	0	0.420828
GSM2475406	0	0.050888	0	0.182152	0.0603348	0	0	0	0.0805192	0	0.0260728	0.102361	0.214214	0.0444685	0	0	0	0	0	0.0169685	0	0.222021
GSM2475408	0	0.0345004	0	0.0496316	0.0460486	0	0	0	0.110839	0	0	0.0617121	0.260863	0.0107418	0	0	0	0.0108932	0	0.0118995	0	0.402871
GSM2475413	0	0.0200026	0	0.0389241	0.0692354	0	0	0	0.0721444	0	0	0.0843201	0.335485	0	0	0	0	0.0134634	0.00645986	0.00223188	0	0.357734
GSM2475421	0	0.0606169	0	0.0470921	0.140689	0.104222	0	0	0.0560855	0	0.0519792	0.0743414	0.271005	0.0142919	0	0	0	0.0105856	0	0	0	0.169091
GSM2475424	0	0.0350542	0	0.193149	0.100875	0	0	0	0.104427	0	0	0.1692	0.168065	0.0266942	0	0	0	0.00726551	0	0.0155399	0	0.179729
GSM2475426	0	0.0801494	0	0.0562508	0.0850481	0.020771	0	0	0.0467972	0	0.00290669	0.0995535	0.212483	0.082121	0	0	0	0.00632885	0	0.00443409	0	0.303156
GSM2475432	0	0.0676192	0.00485594	0.181349	0.0643644	0	0.0299583	0	0.0849337	0	0.0878312	0.068084	0.12329	0	0	0	0	0	0	0.0201546	0.0097436	0.257816
GSM2475435	0	0.0535336	0	0.249604	0.0186992	0	0	0	0.101126	0	0.0335213	0.107033	0.261563	0.0234729	0	0	0	0	0	0.0183841	0	0.133063
GSM2475439	0	0.049838	0	0.241652	0	0	0	0	0.103357	0	0	0.120067	0.283685	0	0	0	0	0	0	0.0185676	0	0.182835
GSM2475445	0.0104703	0.0175633	0	0.166724	0.10265	0	0	0	0.113826	0	0.00558088	0.149705	0.243741	0	0	0.00782059	0	0.0101607	0	0.0211199	0.000866196	0.149772
GSM2475447	0	0.0571854	0	0.245241	0.0677808	0	0	0	0.109855	0	0.0144331	0.103455	0.225671	0.00754426	0	0	0	0.00820229	0	0	0	0.160631
GSM2475453	0	0.0522957	0	0.264156	0.119405	0	0.000959838	0	0.08215	0	0	0.101305	0.170066	0	0	0	0	0.00656203	0	0	0	0.203101
GSM2475458	0	0.0647224	0	0.234171	0.0151662	0	0	0	0.0405395	0	0	0.12049	0.197633	0	0	0.0357237	0	0	0	0.013243	0	0.27831
GSM2475460	0	0.0583523	0	0.204363	0.0812287	0	0.00282724	0	0.0892144	0	0.0155345	0.103324	0.278842	0.0175501	0	0	0	0.010719	0	0.0141035	0	0.123941
GSM2475469	0	0.0670915	0	0.10677	0.211011	0.0646871	0	0	0.0156384	0	0	0.115598	0.130822	0	0	0.0331001	0	0.0100641	0.00625117	0	0	0.238966
GSM2475472	0	0.0558989	0	0.189221	0.145475	0	0	0	0.0829238	0	0.0367433	0.0706845	0.13909	0	0	0.0385584	0	0	0.000687853	0	0	0.240716
GSM2475474	0	0.0554067	0	0.154771	0.0678699	0	0	0	0.107282	0	0	0.102554	0.198249	0.0426354	0.00191992	0	0	0	0	0.0155249	0	0.253786
GSM2475487	0.0274562	0	0	0.109382	0.0642349	0	0	0	0.0966473	0	0	0.0770022	0.251238	0.0546758	0	0	0	0.00780306	0	0.0496941	0	0.261866
GSM2475494	0.021763	0	0	0.0813495	0.0556968	0	0	0	0.0791586	0	0.000410593	0.0668338	0.173205	0.0530823	0	0	0	0	0	0.0348372	0	0.433664
GSM2475495	0	0.0430475	0	0.0916269	0.0245147	0	0	0	0.12044	0	0.0206023	0.0531591	0.436873	0	0.00230374	0	0	0.0151133	0.00873257	0.00208422	0	0.181502
GSM2475497	0	0.0583008	0	0.224702	0.0483164	0	0	0	0.0770876	0	0	0.0915763	0.191404	0	0	0.0255318	0	0	0	0	0	0.28308
GSM2475505	0	0.0529309	0	0.131562	0.117629	0.00328398	0	0	0.0813503	0	0.0228157	0.0794736	0.324758	0.0036233	0	0	0	0.00909913	0	0	0	0.173475
GSM2475506	0	0.0179254	0	0.210479	0.0198261	0	0	0	0.0818744	0	0	0.114543	0.30383	0	0	0	0	0.0133331	0.0171381	0	0	0.221052
GSM2475511	0	0.0787496	0	0.168994	0.0883999	0.0200788	0	0	0.0811743	0	0.0209242	0.0550853	0.301809	0	0	0	0	0.00692763	0.0233415	0	0	0.154515
GSM2475523	0	0.0252429	0	0.337097	0	0	0.0271264	0	0.0782952	0	0	0.134291	0.236361	0	0	0	0	0.0105089	0	0.0225441	0	0.128534
GSM2475526	0	0.0518276	0	0.231314	0	0	0	0	0.0561021	0	0.0164701	0.0986185	0.250069	0.0620555	0	0	0	0	0.0122871	0	0	0.221256
GSM2475529	0	0.0327141	0	0.191231	0.005283	0	0.00318575	0	0.0376687	0	0	0.130939	0.369046	0.0178114	0.00194149	0	0	0	0	0.0110411	0	0.199138
GSM2475532	0.0322764	0.0073278	0	0.119414	0.0254673	0	0	0	0.0631946	0	0	0.0990822	0.121762	0.00689541	0	0	0	0.0125769	0.0489825	0	0	0.463021
GSM2475536	0	0.0343113	0.00128429	0.0876031	0.109646	0.0187112	0.0004582	0	0.121705	0	0	0.122159	0.235302	0.0161105	0	0	0	0	0	0.00376472	0	0.248945
GSM2475540	0.0287443	0.0245904	0	0.152965	0.0696047	0	0	0	0.096686	0	0	0.0757083	0.254003	0.0123874	0	0	0	0.00646527	0.0422357	0	0	0.23661
GSM2475544	0	0.0379712	0	0.0632233	0.0649593	0.00489012	0	0	0.0464608	0	0.0215083	0.0473022	0.255114	0.0142774	0	0	0	0.0112812	0.00437316	0.00128012	0	0.427359
GSM2475545	0	0.0635904	0	0.0474277	0.0845817	0	0	0	0.0743103	0	0.00985028	0.0614847	0.269015	0.0148494	0	0	0	0.0106415	0	0.0165138	0	0.347735
GSM2475552	0	0.0430822	0	0.211407	0.0487267	0.0497189	0	0	0.0437171	0	0	0.102589	0.212573	0	0	0	0	0.0123547	0	0.0241661	0	0.251665
GSM2475561	0.0331217	0	0	0.0370636	0.0309154	0.000386998	0	0	0.0868629	0	0	0.0713256	0.326783	0.032247	0	0	0	0	0	0.0824914	0	0.298803
GSM2475564	0	0.0349604	0	0.0483591	0.0739671	0	0	0	0.0861727	0	0	0.0636273	0.206451	0.0705079	0	0	0	0	0	0.013889	0	0.402066
GSM2475570	0	0.0611573	0	0.11259	0.100343	0.0279143	0	0	0.101186	0	0	0.10282	0.326	0.00202445	0	0	0	0.0111421	0	0.0136324	0	0.141191
GSM2475571	0	0.0621807	0	0.1289	0.0887518	0	0	0	0.094368	0	0	0.0720054	0.298233	0	0	0	0	0.0140075	0	0.0277207	0	0.213833
GSM2475576	0	0.0252788	0	0.149449	0.102599	0	0	0	0.106669	0	0.0337842	0.0773989	0.193669	0.0206653	0	0	0	0.00883813	0	0	0	0.281648
GSM2475582	0	0.0410653	0	0.0277702	0.0590944	0	0	0	0.0625323	0.00583351	0	0.0710387	0.216722	0.0450372	0	0	0	0	0	0.0364949	0	0.434412
GSM2475584	0	0.0631473	0	0.115693	0.00897451	0.0188509	0	0	0.0677502	0	0.00680172	0.0865042	0.242143	0.00983263	0	0	0	0	0.00683123	0	0	0.373471
GSM2475589	0	0.0705969	0	0.144314	0.0686611	0	0	0	0.107462	0	0	0.119471	0.187667	0.0306368	0	0	0	0.0104253	0.011656	0	0	0.24911
GSM2475600	0	0.0787697	0	0.211882	0.0125728	0	0	0	0.121151	0	0.0040898	0.0888805	0.251703	0.0289139	0	0	0	0.0108912	0	0.00191135	0	0.189235
GSM2475610	0	0.0438561	0	0	0.11311	0	0	0	0.0753224	0	0.0218693	0.0457303	0.400532	0.00608993	0	0	0	0	0.00710112	0	0	0.286389
GSM2475613	0	0.0588231	0	0.153254	0.0728751	0	0	0	0.104399	0	0.0425047	0.0517939	0.351893	0	0	0	0	0.0116093	0.00332825	0	0	0.149521
GSM2475619	0.0145822	0.0232769	0	0.1258	0.136891	0	0	0	0.101405	0	0.00384023	0.0733013	0.291853	0.0168766	0	0	0	0.00969839	0.0246088	0	0	0.177866
GSM2475624	0	0.0460611	0	0.188041	0.0111093	0	0.0532913	0	0.0777292	0	0.00723419	0.0884992	0.24225	0.0374667	0	0	0	0	0	0.0106691	0	0.237649
GSM2475633	0.002353	0.0157249	0	0.0452626	0.0685145	0	0	0	0.126206	0	0.00927892	0.0764287	0.347778	0.00746067	0	0	0	0	0	0.0690964	0	0.231896
GSM2475635	0	0.0407867	0	0.0872548	0.117129	0	0	0	0.0662366	0	0.00541632	0.0895271	0.280777	0.0410233	0	0	0	0	0	0	0	0.271849
GSM2475638	0.0181113	0	0	0.0619884	0.0518083	0	0	0	0.0861237	0	0	0.0579578	0.2496	0.026584	0	0	0	0.0118072	0	0.0257403	0	0.410279
GSM2475640	0	0.0337333	0	0.137891	0.102373	0	0	0	0.0927043	0	0.00127068	0.116615	0.169646	0.0553464	0	0	0	0	0.017292	0	0	0.273128
GSM2475647	0	0.05834	0	0.0718024	0.0493645	0	0	0	0.0956244	0	0.0170954	0.0588414	0.229129	0.053004	0	0	0	0	0	0.0159674	0	0.350831
GSM2475657	0	0.0661045	0	0.0555478	0.10115	0	0	0	0.119563	0	0.027541	0.0624259	0.190539	0.0659357	0	0	0	0	0	0.00726591	0	0.303927
GSM2475658	0	0.0468127	0	0.0557281	0.0654373	0.0337406	0	0	0.0890989	0	0	0.0677764	0.187145	0	0	0	0	0.0107457	0	0.0499642	0	0.393551
GSM2475661	0.0413554	0.0218026	0	0.125111	0.114841	0.0129363	0	0	0.106792	0	0	0.087645	0.299332	0.00815071	0	0	0	0.0107108	0.00154908	0	0	0.169773
GSM2475667	0	0.0784123	0	0.114687	0.0921833	0.0152176	0	0	0.0922079	0	0.0269583	0.0717661	0.275281	0.0289973	0	0	0	0.00895201	0	0	0	0.195337
GSM2475673	0	0.0533938	0	0.0717044	0.179209	0.0281844	0	0	0.0498752	0	0.00283929	0.0484588	0.247432	0.0312046	0	0	0	0.0112241	0	0.01655	0	0.259925
GSM2475675	0	0.0302408	0	0.0654695	0.0552698	0.00447335	0	0	0.0631015	0	0	0.0550624	0.284719	0.014753	0	0	0	0	0	0.0188568	0	0.408054
GSM2475681	0	0.043478	0	0.169231	0.158754	0.0244547	0	0	0.0764086	0	0	0.0927986	0.152054	0.00525261	0	0	0	0.00225774	0	0.0331242	0	0.242187
GSM2475689	0	0.0543405	0	0.164694	0.0348587	0	0	0	0.0958945	0	0	0.0782409	0.204006	0.0340375	0	0	0	0.00944584	0	0	0.0214431	0.303039
GSM2475692	0	0.0826669	0	0.0268482	0.0977621	0.0386453	0	0	0.0812878	0	0.0344674	0.0457944	0.228242	0	0	0	0	0.00671957	0	0	0.0443848	0.313181
GSM2475694	0.0175257	0.0485543	0	0.165659	0.0917817	0	0	0	0.101482	0	0.0236423	0.0678049	0.225498	0.0390474	0.0017942	0	0	0	0	0	0	0.217211
GSM2475697	0	0.0527807	0	0.195885	0.0537149	0	0	0	0.120447	0	0.0517212	0.141965	0.187009	0.00943282	0	0	0	0	0	0.0219384	0	0.165107
GSM2475701	0	0.0727911	0	0.0907976	0.0480459	0.0344801	0	0	0.0533495	0.00400258	0	0.0925366	0.221366	0	0	0	0	0.0138008	0.020232	0	0	0.348598
GSM2475702	0	0.0216024	0	0.138512	0	0	0	0.0178484	0.0484769	0	0	0.109135	0.219603	0.0472011	0	0	0	0	0	0.00363617	0	0.393986
GSM2475703	0	0.0708234	0	0.183595	0.0878979	0	0	0	0.0521978	0	0	0.11984	0.136351	0	0	0.00764531	0	0	0	0.0058153	0	0.335833
GSM2475708	0	0.0686623	0.000739781	0.0860516	0.0870446	0.0177574	0.00513029	0	0.0261493	0	0.00888977	0.0374166	0.313844	0.0322099	0	0	0	0	0	0.00426911	0	0.311835
GSM2475713	0	0.0668062	0	0.0873262	0.0433707	0.00767376	0	0	0.0291731	0.00697343	0	0.120855	0.156862	0.00255993	0	0	0.00222034	0.00814317	0.0254688	0	0	0.442568
GSM2475716	0	0.0533679	0	0.0913862	0.0645159	0.0401939	0	0	0.00182212	0	0	0.135852	0.26548	0	0	0	0	0.00966545	0.0172015	0	0	0.320515
GSM2475718	0	0.0465031	0	0.150983	0.110072	0.0557277	0	0	0.0299053	0	0	0.109238	0.174013	0.00626841	0	0	0	0.0110941	0.0317936	0	0	0.274402
GSM2475719	0	0.0413449	0	0.289845	0.0207243	0.0716506	0.0133703	0	0	0	0	0.118667	0.112298	0	0	0.0542467	0	0.0116596	0.0159702	0	0	0.250223
GSM2475720	0	0.0709376	0	0.226074	0.143218	0	0	0	0.0834201	0	0.0447507	0.0733353	0.185664	0	0	0	0	0.00921452	0	0.0195335	0.00152495	0.142328
GSM2475725	0	0.0620105	0	0.103559	0.113827	0.148449	0	0	0.00557397	0	0	0.146119	0.24528	0	0	0	0	0.01065	0	0	0.0024051	0.162127
GSM2475729	0	0.0497092	0	0.280449	0	0	0	0	0.0850732	0	0	0.080446	0.198167	0	0	0	0	0	0	0.0355966	0	0.270559
GSM2475731	0	0.0458163	0	0.0296496	0.05532	0	0	0	0	0.00161455	0	0.0587055	0.137948	0	0	0	0	0.0192874	0	0.0392023	0	0.612456
GSM2475732	0	0.0375455	0	0.19305	0.0576609	0	0.0278059	0	0.0336475	0	0	0.159938	0.280347	0	0	0	0	0	0.0331393	0	0	0.176866
GSM2475733	0	0.0342776	0	0.130218	0.062903	0.00891144	0	0	0.0571732	0	0	0.073764	0.215942	0.019585	0	0	0	0.00204505	0	0.0451075	0	0.350073
GSM2475735	0	0.014976	0.0024001	0.354127	0	0.0460432	0.0456459	0	0	0	0	0.153745	0.212268	0.00660685	0	0	0	0	0	0	0	0.164187
GSM2475741	0	0.0611129	0	0.275462	0.0189552	0	0	0	0.0578875	0	0.0494071	0.0654612	0.249972	0.0113603	0	0	0	0	0.00291744	0.00696847	0	0.200496
GSM2861312	0.0129223	0	0.015083	0.2594	0.117351	0	0.0557911	0	0.0437551	0	0.152565	0.00151107	0.190797	0.00472522	0	0	0	0.0137657	0.00431312	0	0	0.12802
GSM2861313	0.0166681	0.0045441	0.000636917	0.121141	0.165529	0.0291301	0.0721147	0	0.00738	0	0.14682	0.000729989	0.252948	0	0	0	0	0.0025211	0	0	0	0.179837
GSM2861314	0	0.010199	0	0.0732814	0.0697777	0	0.00293214	0	0.025583	0	0.134142	0	0.281446	0	0	0	0	0.00619614	0	0.0190464	0	0.377396
GSM2861315	0.0186448	0	0	0.0586365	0.0694813	0	0.000302683	0	0.0142946	0	0.0355426	0.00236842	0.272841	0.0427014	0	0	0	0.000971305	0	0.0291532	0	0.455063
GSM2861316	0.0197202	0	0	0.093938	0.0955831	0	0.00485653	0	0.0208516	0	0.0596814	0	0.242897	0.00344193	0	0	0	0.00283146	0	0.0302626	0	0.425936
GSM2861317	0.0153316	0.00307611	0.00243111	0.226292	0.085056	0	0.0724228	0	0.00954046	0	0.208345	0	0.183219	0.00514636	0	0	0	0.00277657	0.0126514	0	0	0.173712
GSM2861318	0.0178871	0	0	0.0160355	0.202597	0	0.0450498	0	0.00233009	0	0.158715	0	0.225996	0.0266828	0	0.0204911	0	0.0105786	0	0.00907843	0.00419792	0.26036
GSM2861319	0.0170766	0	0	0.109807	0.0673437	0	0.0126517	0	0	0	0.143798	0	0.199679	0.0228437	0	0	0	0	0	0.000997316	0	0.425803
GSM2861320	0.00513337	0.000130464	0	0.119594	0.0997731	0	0.0773454	0	0.00713651	0	0.118053	0	0.294103	0.0415137	0	0	0	0.00243397	0.00678384	0	0	0.227999
GSM2861321	0	0	0	0.167478	0.0811667	0	0.0177576	0	0.0256498	0	0.121475	0	0.324237	0.0116381	0	0	0	0.00401476	0	0.0207901	0	0.225793
GSM2861322	0.00917249	0.00229136	0.0105963	0.0313171	0.0712369	0.0993545	0.0275848	0	0.0137508	0	0.111581	0	0.229803	0.0703274	0	0	0	0.00938495	0.00460692	0	0	0.308992
GSM2861323	0.0197276	0	0	0.109483	0.107119	0	0.018168	0	0.0306244	0	0.122517	0	0.204175	0.0748054	0	0	0	0.000625704	0.00893659	0	0	0.303819
GSM2861324	0	0.00174425	0	0.0803948	0.0449562	0	0.00070284	0	0.0104696	0	0.0751882	0	0.27032	0.0349734	0	0	0	0.00259675	0.00291719	0	0	0.475737
GSM2861325	0.0115865	0.0015511	0	0.0783152	0.0948617	0.00306165	0	0	0.0317577	0	0.134035	0	0.207725	0.0158168	0	0	0	0.000335723	0	0	0	0.420954
GSM2861326	0.0317378	0	0	0.102187	0.101684	0	0.101337	0	0	0	0.0629567	0.00911495	0.248312	0.0204005	0	0	0	0.00393146	0.00267179	0	0	0.315666
GSM2861343	0.014777	0	0	0.167762	0.0505732	0	0.0548832	0	0.00252196	0	0.053822	0.00826763	0.312079	0.0542941	0	0	0	0	0	0.0105802	0	0.27044
GSM2861344	0.0244652	0	0.004499	0.137955	0.0643664	0	0	0	0.0387053	0	0.0158139	0.0544134	0.212586	0.0357214	0	0.00171998	0	0	0	0.0312116	0	0.378543
SRR10424399	0	0.00992534	0.00802529	0.142693	0.0797856	0	0.0386663	0	0.0156176	0	0.0440698	0.0429432	0.307105	0.0113026	0	0	0	0.00188546	0	0.0127206	0	0.28526
SRR10424400	0	0.00913616	0	0.13308	0.0677714	0	0.0183847	0	0.0195662	0	0.0107588	0.041251	0.313929	0.0340142	0	0	0	0.0039922	0	0.0320577	0	0.316059
SRR10424401	0.006876	0.00657883	0	0.22199	0.0844221	0	0	0	0.054863	0	0.0299884	0.112001	0.230121	0.0212292	0	0	0	0	0	0.00262692	0	0.229303
SRR10424403	0	0.0368843	0	0.120875	0.150898	0	0	0	0.103237	0	0.0305133	0.0446385	0.305323	0.0189178	0	0	0	0.0107401	0	0.00604554	0	0.171927
SRR10424404	0.0162816	0.00795996	0	0.222351	0.0502386	0	0	0	0.0256835	0	0	0.0902496	0.247296	0	0	0	0	0.00385665	0.00719595	0	0	0.328887
SRR10424405	0.00127382	0.0152039	0.0023173	0.118567	0.0689454	0	0	0	0.037287	0	0	0.0798703	0.22219	0.0167597	0	0	0	0.000138173	0	0.01444	0	0.423007
SRR10424406	0.0195409	0.0050309	0	0.229145	0.0608094	0	0	0	0.0570562	0	0	0.111636	0.229991	0	0	0	0	0.0010576	0	0.00703578	0	0.278698
SRR10424407	0.00153745	0.00601589	0	0.101429	0.118008	0	0.0190537	0	0.0018833	0	0.0741215	0.0143666	0.356807	0.00351674	0	0	0	0.00615318	0	0.0124866	0	0.284621
SRR10424408	0	0.0108484	0	0.0458852	0.0876601	0.0019299	0	0	0.0184299	0	0.00125014	0.039112	0.321447	0.0407471	0	0	0	0.00238517	0	0.0161283	0	0.414177
SRR10424409	0	0.0337953	0	0.13259	0.0870771	0	0	0	0.0403458	0	0	0.104743	0.254291	0.00891369	0	0	0	0.00317269	0	0.0090877	0	0.325984
SRR10424414	0	0.023758	0	0.0976063	0.0784825	0	0.0242827	0	0.0194266	0	0.0467366	0.0290113	0.365845	0.00910727	0	0	0	0.00483526	0.00154017	0	0	0.299368
SRR10424415	0	0.0143117	0	0.0737582	0.108133	0	0	0	0.0195129	0	0.0253779	0.0634654	0.240237	0.0129987	0	0	0	0.000394793	0.00533636	0	0	0.436475
SRR10424416	0.00746065	0.0114047	0	0.16357	0.0753522	0.00753762	0.0240235	0	0.0348129	0	0.0425085	0.0735489	0.24473	0.0191494	0	0	0	0	7.26281e-05	0	0	0.295829
SRR10424432	0	0.0408546	0	0.0827456	0.109704	0	0	0	0.0979875	0	0.00881658	0.0653076	0.294304	0.0257218	0	0	0	0.00979528	0	0.00727502	0	0.257488
SRR10424465	0.00737403	0.00647229	0.00515205	0.324955	0.0661756	0	0.00543527	0	0.0562821	0	0.0250986	0.0923776	0.185476	0	0	0	0	0	0	0.00182858	0	0.223373
SRR10424466	0.0168953	0.0166015	0.00789708	0.239444	0.0884683	0	0	0	0.0601669	0	0.030487	0.0406813	0.233174	0.019482	0	0	0	0	0	0.00363847	0	0.243065
SRR10424467	0	0.00789576	0.00052146	0.199737	0.0457207	0	0.00969281	0	0.0295243	0	0.00161629	0.0686358	0.321391	0	0	0	0	0.00162887	0	0.00519537	0	0.30844
SRR10424468	0	0.0166739	0	0.156779	0.0538988	0	0	0	0.0617611	0	0.00970116	0.0697672	0.22444	0.017959	0	0	0	0	0	0.0188409	0	0.370179

## Sheet: xCell
	Adipocytes	Astrocytes	B-cells	Basophils	CD4+ T-cells	CD4+ Tcm	CD4+ Tem	CD4+ memory T-cells	CD4+ naive T-cells	CD8+ T-cells	CD8+ Tcm	CD8+ Tem	CD8+ naive T-cells	CLP	CMP	Chondrocytes	Class-switched memory B-cells	DC	Endothelial cells	Eosinophils	Epithelial cells	Erythrocytes	Fibroblasts	GMP	HSC	Hepatocytes	Keratinocytes	MEP	MPP	MSC	Macrophages	Macrophages M1	Macrophages M2	Mast cells	Megakaryocytes	Melanocytes	Memory B-cells	Mesangial cells	Monocytes	Myocytes	NK cells	NKT	Neurons	Neutrophils	Osteoblast	Pericytes	Plasma cells	Platelets	Preadipocytes
GSM1008078	0	0	0.173701	0.344995	0	0	0	7.21029e-18	0.0505349	0	0	3.57096e-18	0	6.57835e-19	1.60799e-19	7.50218e-18	0.190002	2.45765e-19	0.0115081	5.00397e-20	0.0089512	4.35426e-05	0.0976842	8.93908e-19	0.142728	0.00723655	1.30077e-19	0.0367231	0	0.199506	7.65912e-19	0	0	0.0324207	0.0476493	0.0082239	0.0979893	0.0154776	0	0.0362336	0	0.149203	0.0041871	0.00807989	0.0494105	0.0594572	0.0288354	0.00971973	0.0477466
GSM1008079	7.01358e-19	2.16397e-17	0.0971327	0.355997	0	0	1.61943e-17	0	0.00275457	0	0	6.46359e-18	0	0	0.00462088	1.78349e-17	0.185605	0.0108759	0.026447	0.0999037	0.0246892	6.4183e-19	0.116079	8.69931e-18	0.140332	0.00886565	0.00271608	0.0277262	0	0.321765	0	0.0042974	0.00172676	0.0337315	0.0059924	0.00906269	0.0571684	0.0237066	0	0.0434504	8.62071e-18	0.200247	0.00278826	0	0.0297634	0.129295	0.043398	9.12875e-18	0.00186248
GSM1008080	7.69666e-19	1.89918e-17	0.114535	0.332163	0	0.00624056	9.17609e-18	9.03405e-19	0.0497471	9.84431e-18	0	6.99797e-20	0	1.45794e-18	4.09393e-19	3.20369e-17	0.172526	0.00980181	0.0169092	0.0665428	0.0163015	6.45795e-20	0.0813103	0	0.101406	0.00569646	2.1777e-19	0.0270219	0	0.241346	0	8.56435e-20	0.000666617	0.0299029	0	0.00928423	0.0536979	0.00939198	0	0.0369927	8.32359e-17	0.174731	0.00295901	0.00192899	0.0530579	0.091396	0.0350698	0	0.0265527
GSM1008081	0	6.70995e-18	0.274155	0.293505	0.00866423	0.00428214	7.50963e-18	0.0173503	0.143921	0.0602948	0.109629	0.00397056	0.0210437	0.0348353	2.09089e-18	4.41213e-18	0.181153	1.12682e-21	0.00146225	0	4.54751e-19	0	0	0	0.098617	0	2.45443e-18	0.0362374	1.21863e-17	0.0824088	0	0	0	0.0281743	2.00259e-18	0.00456272	0.130772	3.29896e-18	0	0.0227936	1.96546e-17	0.0567886	0.00180177	9.30094e-19	0.0830663	0	0.0398433	4.71074e-19	0.147833
GSM1008082	0	2.50973e-17	0.133164	0.34896	0	5.19674e-21	0	0	0.0664345	0	3.28473e-18	9.71923e-19	0.000376364	2.98321e-18	2.19629e-19	2.03306e-17	0.173669	0.00462447	0.0157761	0.0290829	0.00918662	0	0.0693982	0	0.113301	0.00579842	2.20603e-19	0.0450567	3.57514e-18	0.276419	0	0.00186966	0	0.0317248	0.00365073	0.008723	0.0633577	0.0137378	9.06586e-18	0.0437158	0	0.144346	0.00313593	0	0.0477776	0.0455913	0.0559594	6.35801e-18	0.0420093
GSM1008083	0	1.7108e-17	0.0789137	0.288632	5.2659e-18	0.00214118	7.01252e-18	0	0.0361833	0	4.4538e-18	2.29129e-17	0	0	0.0129879	0	0.151104	0.00168384	0.0158577	0.0205775	0.0262774	0.0181384	0.0700644	1.51417e-17	0.115953	0.0074653	0.00169802	0.0293361	0	0.185691	0.00258733	0.0029928	0.00232411	0.0266838	0.0377315	0.0113396	0.0323291	0.00742001	0	0.0424998	5.77231e-17	0.147995	0.00301355	0.0209253	0.0183339	0.0430976	0.0383361	0	0.0233768
GSM1008084	1.19386e-18	2.13103e-17	0.11915	0.230464	0	0	8.76243e-18	3.90477e-18	0.0764295	2.7209e-18	0	1.11245e-18	3.67709e-19	0	0	2.6459e-18	0.181829	0.00512785	0.0168981	0.111426	0.0257039	0	0.0644086	0	0.12774	0.00324391	0.00053966	0.0358361	6.25711e-18	0.228651	0	0	0	0.0418349	0.0135665	0.00715377	0.0596965	0.00543918	0	0.0381069	4.15081e-17	0.187616	0.00294052	0	0.0483449	0.0673503	0.0252154	6.42129e-20	0.0374331
GSM1008085	1.73512e-18	2.1355e-17	0.111461	0.322014	6.81577e-18	0	2.05931e-17	0	0.0549131	0	0.00655211	3.29393e-18	0.000792084	1.75439e-18	1.00912e-18	0	0.148785	0.00685192	0.020575	0.107506	0.0233662	0	0.0991797	0	0.120892	0.00454078	0	0.0308769	5.57683e-17	0.258253	0	0	2.49256e-19	0.032296	9.21576e-21	0.00848924	0.0539036	0.0100608	7.09418e-18	0.0419281	3.1829e-17	0.184109	0.00517844	3.54325e-18	0.0424407	0.0543233	0.0497972	9.38957e-18	0.0177891
GSM1008086	0	1.88326e-17	0.0825908	0.261842	1.47362e-17	0	0	2.5961e-18	0.0382804	0	0	6.88218e-17	1.62419e-18	1.75763e-18	0	0	0.146896	0	0.020949	1.30077e-18	0.0283479	0	0.0858466	1.64911e-17	0.120856	0.00800342	0.00109021	0.0122635	1.65915e-17	0.207147	1.95689e-20	0	0	0.0146718	0.0159989	0.0110461	0.032952	0.0127258	3.17953e-21	0.0252845	6.11656e-17	0.248662	0.00201905	0.0217374	0.046058	0.0611639	0.0437678	0	0.0128144
GSM1892913	0	1.69709e-17	0.0223739	0.201275	0	0	1.2811e-17	0.00639015	0.0837755	1.56086e-17	0.000111868	0	0.0079397	0.00818729	0.0119465	0	0.0514469	0	8.72448e-19	0	0.00407187	0.0227205	0.00325266	0.000432199	0.0994855	0	0	0.0249791	0	0.0606258	0.00646793	0	0.00490739	0.0208495	0.0175463	0.00754908	0.00399647	0.00188838	0.0178654	0.0164381	9.07014e-18	0.166615	0.000752178	0.029793	0.106466	6.53369e-18	0.00508812	0.00279401	2.96169e-18
GSM1892914	1.10054e-18	0	0.0453482	0.173412	2.83912e-19	0.00711737	0	0.0200412	0.128926	0.0368646	0.0657231	1.07106e-18	0.0246101	0.0201485	0	0	0.0567606	0	1.31558e-18	0	0.00310818	0.0103108	0.0242709	2.52081e-18	0.0760352	0.00147129	2.57196e-18	0.0226552	9.49271e-18	0	0.0015991	0	8.58596e-05	0.0258236	0.0115559	0.00545029	0.0132126	0.00796116	0.0026905	0.0117766	3.94847e-18	0.25805	0.000859009	0.0163241	0.123877	0.00862049	0.000646866	9.31143e-20	0.0164013
GSM1892915	0	2.63846e-17	0.0315504	0.26771	0	1.53979e-18	0	0	0.0355247	3.00786e-18	0	1.35906e-17	2.52061e-05	0	2.08175e-19	1.87603e-18	0.0746915	1.76058e-19	0	0.0248466	0.00901427	0.00970436	0.000305827	1.02859e-17	0.0759309	0.00111002	3.38296e-18	0.00423422	2.31357e-17	0.142693	0	2.23983e-18	0.00139074	0.0237818	0.0237765	0.00865439	0.0104141	0.00230906	2.99283e-20	0.0153129	4.48182e-17	0.244848	0.0010105	0.038307	0.0902443	0	0.00161875	7.17431e-19	0
GSM1892916	0	6.7844e-18	0.0547481	0.222492	0	0	2.93246e-17	0	0.056556	3.42496e-17	0	0	0	0.0187983	0.00112068	0	0.0746315	0	0	0.0145808	0.00644244	0.00859982	0.0149005	7.62016e-19	0.103483	0.00535336	6.78458e-19	0.0265753	1.97577e-18	0.0621364	0.00971552	0.00290119	0.0062515	0.0281758	0.0486371	0.00879603	0.0230999	0.00326001	0.0213809	0.0111528	1.21519e-17	0.196108	0	0.0350384	0.122463	0.00738101	0.000820101	0.0247019	0.0145423
GSM1892917	0	1.07735e-17	0.00595466	0.3394	1.32988e-17	2.60739e-18	0	0	0.0205606	0	0	1.13593e-17	0.0110469	2.19698e-20	1.12414e-18	8.25152e-18	0.0476475	0	0	0	0.00378863	0.0132082	0.00486409	1.94917e-17	0.0617377	0.00321187	0	0.00286705	3.85893e-18	0.144197	1.16771e-18	1.38607e-18	6.46847e-20	0.0211119	0.0174299	0.00753379	0.00108736	0.0079854	1.6329e-18	0.0195564	3.25516e-17	0.19027	0.000976314	0.0334111	0.0829619	0.0120659	0.00281017	3.43263e-18	0
GSM1892918	0	0	0.092946	0.275412	9.9711e-19	3.526e-18	0	1.53517e-19	0.0547991	2.11445e-18	0.0293329	6.24129e-18	0.0124932	0.0106041	1.14524e-18	0	0.082887	0.00213842	2.81527e-20	0.00196393	6.65876e-21	0	0.0184635	0	0.0901324	0.00437119	0	0.0235313	0	0.0547522	0.00693795	0.00199644	0.0122008	0.0324079	0.0358683	0.00752231	0.0426275	0.00611816	1.53113e-18	0.00450255	2.01985e-17	0.163311	2.16738e-20	0.0149134	0.123803	0.0087621	0.00353545	0.035231	0.0286218
GSM1892919	0	0	0.0480832	0.282845	2.04836e-17	3.44428e-18	3.12005e-17	1.28864e-18	0.0123249	0	0	0	4.77902e-19	0.0073571	0.00128393	1.96797e-17	0.0711619	0	0	1.33313e-20	0.0065684	0.0124129	0.0353238	2.14317e-17	0.0863029	0.00576965	0	0.0164595	0	0.0928753	0.0196642	0.00602056	0.00635242	0.0259046	0.0286433	0.00915264	0.0233537	0	0.0168484	0.0132113	3.2443e-17	0.221847	0.000137003	0.038946	0.107696	0.0150707	0.00158047	0	0
GSM1892920	0	0	0.0527475	0.248613	3.97342e-18	0	2.32812e-17	0	0.0681278	0	0.00118682	0	0.010445	0.0273093	0.00224446	0	0.0728298	1.81818e-19	6.80366e-19	0	0.00299938	0.0165679	0.0320914	0	0.155132	0.00256515	1.5972e-18	0.0444789	5.05228e-18	0.0202657	0.0099502	0.00371105	0.0043197	0.0374456	0.0254783	0.00656786	0.0169319	3.7949e-21	0	0.0176541	0	0.157297	0	0.0166384	0.117171	0	4.95562e-19	0.0336836	0.0331088
GSM1892921	0	1.22499e-17	0.1254	0.338025	0	0	6.8744e-18	0.0187051	0.111687	0.0320219	0.0991421	0	0.0306915	0.0126542	3.44865e-18	2.20131e-19	0.0995117	0	0	5.607e-19	6.02934e-19	0.00730404	2.81725e-20	0	0.0648229	0	0	0.00681873	2.26982e-17	0.040272	0	0	6.51744e-20	0.0304041	1.95773e-19	0.00564012	0.042687	0	9.62156e-18	0.023499	2.55184e-17	0.11733	0.000738206	0.00650335	0.113486	0	0	0	0.010398
GSM1892922	1.30621e-19	6.16382e-18	0.0288852	0.222634	0	0	3.47416e-17	0	0.034323	3.23005e-18	0	0	2.91827e-19	0.00364034	0	1.15515e-17	0.0616331	0	0	0	0.00561708	0.00529063	0.0216091	0	0.101133	0.00548197	2.53613e-18	0.0135122	0	0.0623431	0.0149182	0.00212919	0.00310372	0.0221533	0.0290444	0.0092969	0.0110274	0.00456529	0.0120781	0.00207092	9.8641e-18	0.303945	8.89241e-05	0.0272899	0.110689	0.00748833	0.00344431	0	0.00958753
GSM1892923	7.53238e-19	1.40513e-17	0.0743793	0.265994	7.51457e-19	0	0	1.83861e-18	0.0127458	0	5.49482e-18	0	0	0.00609982	3.05472e-19	8.46638e-18	0.0795263	0.000626605	8.24645e-20	0.0376906	0.00129686	0.021142	3.09321e-19	8.3193e-18	0.0807415	0.00494565	1.16113e-18	0.00606213	0	0.0884876	0	0	0.00286092	0.0335398	0.0340546	0.00866465	0.0346691	0.00598879	3.44458e-18	0.0185962	5.72561e-17	0.208732	0.000703984	0.0217788	0.0917454	0	0.000930088	0.0123579	0.00529978
GSM1892924	2.75152e-19	1.17581e-17	0.111093	0.272921	9.53484e-19	2.19705e-18	0	0.00603193	0.0671193	0	0.0505838	8.64755e-18	0.0118263	0.0103665	4.32092e-18	0	0.0956963	0.00670046	0	0.0944682	0	0.00480728	0	2.08659e-17	0.104809	3.29834e-21	5.97238e-18	0.000484579	2.94322e-17	0.00894953	4.75807e-19	4.95474e-19	0.000886206	0.0435338	0.00139347	0.00608313	0.0461628	5.52835e-21	0	0.0161309	1.31761e-17	0.123284	0.00025642	2.26669e-18	0.123826	0	0	0	0.039971
GSM1892925	1.08724e-18	4.16091e-18	0.0673307	0.275519	0	0	0	4.55285e-19	0.0607913	2.41106e-19	0.0331291	0	0.0152354	0.00710099	0	0	0.0794038	2.75678e-19	0	5.36424e-18	0	0.00492988	0	0	0.0882309	0.000707953	0	0.0218499	3.6905e-17	0.0457582	0.0080711	0.00273427	0.00549179	0.0332082	0.0100988	0.0068606	0.0240135	5.38626e-19	2.14722e-19	0.00491006	2.79562e-17	0.174529	0.000161369	0.0184873	0.123935	0	2.24582e-19	0	0.0167514
GSM1892926	1.99861e-19	7.94975e-18	0.0999413	0.225976	1.79612e-18	0	0	2.72826e-20	0.0564364	0	4.44635e-18	0	1.36817e-19	0.00358231	0	1.04605e-17	0.0922166	0.00529093	0	0.0429418	0.005309	0.00662252	0.0130109	0	0.0637335	0.00530355	1.06784e-18	0.0126791	2.49556e-17	0.103604	0.00588409	0.00222766	0.00140708	0.0343797	0.0125304	0.00940274	0.0460582	0.00216101	0.00997076	0.00857441	4.33368e-17	0.255257	0.000345243	0.0232279	0.105983	0.0224196	0.00128513	0	0.0051682
GSM1892927	0	0	0.155897	0.227148	3.88908e-20	2.37905e-19	0	2.52867e-19	0.046572	0	0	0	0	0.00775925	0	1.45646e-17	0.112436	0	0	1.60435e-18	0.00278363	0.00239953	0.00347535	8.70508e-19	0.111806	0.00586626	1.84615e-19	0.011179	0	0.121544	0.0145099	0.00588333	0.00561166	0.027008	0.0363394	0.00924092	0.0720631	0.0014515	0.0112214	0.00489952	4.82102e-17	0.204067	0.000401969	0.0280269	0.108048	0	0.00140857	0.0014689	0.0243147
GSM1892928	1.88929e-19	6.38405e-18	0.0920677	0.258875	6.7732e-18	5.5016e-19	1.31222e-19	0	0.0557846	6.7703e-18	0.00786863	0	0.00494978	0.00774089	0.00063701	0	0.0924809	0	0	7.14864e-19	0.0020958	0.0192956	0.00756047	0	0.0684091	0.00405923	7.23246e-19	0.0121508	7.04103e-18	0.07448	0.00563555	0	0.00102936	0.0328961	0.0238215	0.00775316	0.0362949	0.00863251	0.00271987	0.0203068	2.46464e-17	0.232221	0.000581194	0.0262745	0.092415	0	9.11631e-07	1.85849e-19	0
GSM1892929	0	1.24164e-17	0.00835801	0.246058	1.84591e-17	1.66468e-18	3.50097e-17	0	0.0358643	0	0	0	1.38255e-19	0.00187371	2.69036e-19	2.12815e-18	0.0619297	0	0	0	0.00864188	0.00724385	0.0321895	0	0.129468	0.00652736	1.02481e-18	0.0098793	0	0.0670005	0.00875666	0.00565558	0.00311325	0.0274233	0.0512396	0.00762674	0.00106857	0.0103831	0.0146592	0.0128925	2.45735e-17	0.222645	2.08251e-06	0.0301942	0.103397	0.0197934	2.69781e-05	0.0253342	0.00272629
GSM1892930	0	4.9506e-18	0.0460821	0.251579	1.29651e-17	0	2.67458e-17	0	0.036088	8.74406e-19	1.89118e-18	0	0.00402134	0.000236682	1.8168e-21	7.10978e-18	0.0771902	0	2.07574e-19	6.80981e-19	0.00750669	0.0166604	0.0108294	0	0.110646	0.0047107	2.17564e-19	0.0189958	0	0.0647335	0.00359765	0	0	0.0275282	0.0576244	0.00711561	0.012619	0.00807925	0.000538953	0.0137652	1.49902e-17	0.188757	6.05642e-20	0.027222	0.0941699	0	0.000249863	0.0692582	0.0121511
GSM1892931	1.23536e-18	7.0872e-18	9.42131e-19	0.223355	1.8199e-17	4.76688e-18	2.5598e-17	0	0.0172862	0	1.20016e-17	0	0	0.00472612	0.00858479	0	0.0390784	2.00553e-19	8.57822e-05	0.000605667	0.00632077	0.0118855	0.0196472	0	0.110291	0.00480457	0	0.0205837	1.79686e-18	0.125741	0.020752	0.00978973	0.0204007	0.0247094	0.0298462	0.00854434	1.02091e-18	0.00170587	0.0275647	0.0113346	2.11088e-17	0.172569	0.00034708	0.0394592	0.101618	1.81764e-19	0	0	0.00353473
GSM1892932	0	9.93477e-18	0.094704	0.273365	8.04195e-19	0	0	0	0.00868021	0	1.87673e-18	0	0	0.00534449	0.0111985	0	0.0888363	0.00160421	5.0122e-21	0.0445325	0.0049767	0.0149985	0.0236336	1.15402e-18	0.117341	0.00600077	5.33235e-19	0.0264074	0	0.119454	0.0181258	0.00664745	0.00601196	0.0412016	0.0486701	0.00967113	0.0488483	0.00230163	0.00484024	0.0137227	6.46493e-17	0.171996	0.000124826	0.0260589	0.104061	9.64148e-20	0	0.0118179	0.00319128
GSM1892933	0	1.82064e-17	0.10636	0.354655	0	3.16166e-18	0	0	0.093418	2.31448e-19	0.0214231	0	0.0295602	0.0103525	0	0	0.101402	0	1.38345e-18	0	0	7.59794e-20	6.10802e-18	0	0.0671633	0	0	0.0102094	0	0.0547996	8.08069e-20	3.20585e-19	0.00273539	0.0243099	0	0.00512934	0.0378044	9.31675e-19	0	0.00655791	3.80435e-17	0.147327	0.000450411	0.0109998	0.125231	0	0	0	0.0568957
GSM1892934	0	4.4664e-18	0.116447	0.241522	0	6.3394e-19	1.4828e-17	0.00217478	0.0946543	0	0.0304555	2.03253e-17	0.0192054	0.00951087	0	0	0.10089	3.92772e-20	5.99821e-19	0	1.42995e-20	6.19725e-20	0.00561283	0	0.105275	0.00274887	0	0.00849044	0	0.0748293	0.00385224	6.98798e-21	0.00399445	0.0198363	0.0100218	0.00690237	0.0479258	0	2.49467e-19	0.002861	6.2513e-18	0.184826	0.000385222	0.0179448	0.124652	1.58364e-18	0.000652581	0	0.0446629
GSM1892935	0	1.75562e-18	0.177032	0.265405	2.74485e-18	6.77487e-18	0	3.31252e-18	0.0360351	0	0.0740914	3.11016e-18	0.0119796	0.0127679	0	0	0.119327	0.00133754	0	0.0167544	5.99807e-05	0.00345038	0.0116348	4.92496e-19	0.043533	0.00373602	2.31593e-18	0.00781203	0	0.0583987	0.00495863	0.00134938	0.00124479	0.0343519	0.00978726	0.00922274	0.0851564	0.00771088	3.68348e-18	0.0147555	7.77241e-18	0.225836	0.000696749	0.00913976	0.120772	0	0.00204176	0	0.0447286
GSM1892936	0	1.38814e-17	0.0890306	0.241974	2.04476e-17	0	1.66225e-17	1.27283e-18	0.0496325	0	0	0	0	0.00319688	2.63694e-19	0	0.103655	0	0	0.0177248	0.00700404	0.00496944	0.0211512	1.07624e-20	0.101561	0.00604413	4.03023e-19	0.00903688	2.6354e-18	0.135026	0	0	2.93729e-19	0.0355466	0.0466303	0.00699888	0.0394681	0.000659833	0.000523196	0.00703637	3.2209e-17	0.217568	0.000315067	0.0390638	0.0756741	0.0272314	0	0.020962	0.00648454
GSM1892937	0	2.69727e-17	0.125368	0.34384	0	0	0	0	0.0600259	0	5.53165e-19	0	0.00510706	5.61134e-21	0	0	0.116378	7.26982e-20	0	8.18796e-19	0.00480558	0	0.0238953	0	0.0573218	0.00464435	2.10462e-18	0.00503009	1.5524e-17	0.101442	0	0	2.74626e-19	0.0270333	0.0100346	0.00891464	0.0602039	0.00778106	6.96857e-19	0.00645385	4.27669e-17	0.290504	0.000575035	0.024827	0.0979787	0.022169	0.00368192	1.59545e-19	0.0386555
GSM1892938	0	1.58669e-17	0.0501158	0.275639	0	0	0	1.12679e-18	0.0582818	0	1.21968e-18	0	0	8.40043e-20	0	2.62111e-17	0.0883556	1.02848e-20	3.41924e-19	0.00859954	0.00530451	0.0034418	0.0164158	0	0.0738205	0.0028939	0	0	7.96241e-18	0.158802	4.75904e-19	0	0	0.0239604	0.0196623	0.00807293	0.0197149	0	0	0.0130267	3.58653e-17	0.18497	0.000466389	0.0378457	0.0827722	0.00207663	0	1.11252e-18	1.68173e-18
GSM1892939	7.85151e-19	1.5766e-17	0.0295551	0.335913	0	5.40085e-18	0	2.96362e-18	0.0379025	6.30232e-18	1.46031e-18	0	5.13684e-19	0	0	0	0.0672273	0	0	1.83124e-18	0.00925097	0.00963638	0.0251516	0	0.0765752	0.00637048	1.47292e-18	0.00744538	0	0.150053	0.00150076	0	0	0.0260121	0.0313555	0.00934327	0.0132583	0.00979835	0	0.0174621	4.67065e-17	0.311029	0.000411826	0.0322197	0.0731004	0.0225829	0.00498404	5.56997e-18	0.00174535
GSM1892940	9.25848e-19	1.20902e-17	0.0919104	0.242332	5.81737e-18	1.76867e-18	3.3195e-17	3.2253e-18	0.0624625	0	0	2.53382e-17	1.24606e-19	0.00348246	3.73505e-18	1.05498e-17	0.0938245	0	0	0	0.00599583	0.000559542	0.0334718	1.94433e-17	0.0753738	0.00547268	0	0.0134575	0	0.125746	0.0114029	0.00636382	0.00190007	0.021637	0.0353462	0.0089336	0.0430618	0.00621724	0.0073607	0.00716665	2.66597e-17	0.235282	0.00011512	0.0253213	0.106818	0.0347459	0.00160865	0.00505316	0.013903
GSM1892941	8.01936e-19	2.28126e-17	0.041143	0.311375	0	0	0	0	0.0578393	0	0	0	0.010716	0.00173794	1.77485e-20	0	0.0779624	4.50338e-21	0	0.0234183	0	0.00620331	0.0122581	0	0.0530228	0.00200366	0	0.0291452	6.03147e-18	0.123539	0.00147157	0	0.00562653	0.0369886	0.0142157	0.00726532	0.017405	0.00498875	2.15869e-19	0.0139419	2.15121e-17	0.199989	0.000753577	0.0241225	0.102782	3.88268e-18	0.000261816	0	0.0143688
GSM1892942	1.12143e-18	1.63158e-17	0.0610189	0.254723	2.12107e-18	0	0	0	0.0531346	0	0	1.14246e-17	0.00550161	0.00115513	2.97086e-18	1.97697e-18	0.0888175	0.000513363	6.28622e-20	0.0255268	0.00242698	0.00461156	0.00809712	5.93641e-18	0.0675818	0.00479076	9.87555e-19	0.00882859	2.67659e-18	0.152923	0.00465797	0.00285547	0.00543651	0.0301139	0.0239383	0.00903789	0.0308848	0.0068207	0.00175638	0.0153544	3.20992e-17	0.209096	0.000818061	0.0214745	0.0962324	0.0153299	0.00296884	0	0
GSM1892943	1.23253e-18	5.19922e-18	0.108318	0.258865	5.17297e-18	1.17219e-18	1.82592e-17	0	0.107359	0	0.028946	5.89802e-18	0.0150398	0.0078363	0	2.3176e-18	0.1072	0.00285939	4.57697e-20	0.0255184	0.00221732	6.58056e-20	0.0103253	0	0.0654491	0.00281678	7.13709e-19	0.0198072	6.64466e-18	0.0987773	0.00134573	0.00169456	0.00153927	0.0343146	1.77253e-19	0.00642948	0.0410308	0.00553035	0	0.00633604	1.19504e-17	0.203285	0.000445334	0.0101094	0.104909	0.0215148	0	7.15308e-19	0.0150978
GSM1892944	0	6.91504e-18	0.0949693	0.234138	4.46036e-18	0	2.34183e-17	3.45223e-19	0.0770202	0	0	0	0	0.0191432	0	0	0.0954779	0.00495146	0	0.0416146	0.0022662	0.00662951	0.0127143	0	0.0993492	0.00386602	0	0.0193435	7.27411e-18	0.0468265	0	0	0.00423934	0.0319204	0.0301163	0.00747741	0.0395887	0.00505159	0.00233835	0.0119335	9.12924e-18	0.180126	0.000579693	0.0236325	0.108079	0.0165816	0	0.0101199	0.0183003
GSM1892945	1.90004e-18	5.26162e-18	0.0774692	0.333988	0	0	0	0	0.0778857	0	0	0	0.0206644	0.0122917	0.000241982	0	0.0944097	2.3428e-05	1.78585e-19	0.0390996	0.00209013	0	0.0101276	2.81924e-19	0.056105	0.0019444	1.69728e-18	0.0196121	0	0.107517	0	0	0.00380368	0.0289992	5.73138e-20	0.00824314	0.027364	0.00573053	0	0.00614211	3.4259e-17	0.170208	0.000784489	0.0224564	0.0987333	2.31302e-18	0.00165954	0	0.00248535
GSM1892946	1.21569e-18	1.45826e-17	0.0713723	0.303008	1.68848e-17	0	2.87617e-17	0	0.0343142	0	0	0	0	3.08398e-19	0	0	0.0872683	0	0	0	0.00545962	0.0151784	0.00589794	1.05523e-17	0.0817069	0.0049298	5.38836e-19	0.00283279	0	0.142833	0	0	9.61013e-20	0.027527	0.0389926	0.00835344	0.0353518	0.00541388	0	0.0189609	4.25487e-17	0.173597	0.000520118	0.0249748	0.0743757	0	0.00107786	0.0152027	2.94133e-18
GSM1892947	0	1.48496e-17	0.0667509	0.29405	1.05307e-18	2.4326e-18	0	0	0.00935756	1.59949e-18	0	0	6.7812e-19	5.33834e-19	0.00247743	0	0.11032	5.62162e-19	0.000444327	0	0.0114215	0.00578037	0.0235957	1.30178e-17	0.097878	0.00674091	5.71402e-19	0.00373535	0	0.143481	0.000422234	0.00181009	0.00174931	0.0245632	0.0300751	0.0101512	0.0358682	0.00940225	0.00677178	0.0130579	4.34274e-17	0.189069	0.000858472	0.043241	0.0754486	0.0119513	0.00100453	0	1.55035e-18
GSM484449	0.000875382	7.45951e-18	0	0.161993	0	0	0	0.0206278	0	0	9.67871e-19	9.07524e-19	0.0354533	0.0162338	0.00174268	2.36755e-17	1.51625e-20	0	0.0193316	0.0053278	0.00696027	0.0106704	0	0.0582563	0.164166	0.00135486	1.39022e-19	0.0652294	1.29459e-19	0.049412	0.0136232	0.00482668	0.0212735	0.0304601	0.0924772	0.00556504	0.0011613	0	0	0.020842	0	0.0290172	0.000325345	0.0135999	0.0711427	0	0.0424506	0.125295	5.21819e-18
GSM484451	4.9908e-21	2.06768e-19	0.000841877	0.137126	1.73178e-18	5.59925e-20	0.00278188	0.0259771	0	0.0251136	0.00954388	0	0.0613193	0.0347486	9.15263e-20	8.76085e-18	3.094e-18	0.000228139	0.0100187	0.00736273	0.00554668	0.0224482	4.83998e-20	0.0286694	0.176304	0	0	0.0801453	0	0.0472321	0.00419681	0.00104344	0.0123111	0.0441637	0.0686588	0.00389326	0.00358358	0.00729745	0	0.018028	0	0.0308838	9.07267e-20	0.0085081	0.0375402	0.0205572	0.0360917	0.132172	1.06631e-17
GSM484456	6.43849e-21	1.31595e-17	0	0.216595	0	0	0	0.00901688	0	0	6.29716e-18	1.80839e-18	0.0291039	0.0207609	0.0389494	0	0	5.29169e-19	0.0123644	0.00566506	0.00710867	0.0085992	0.00134281	0.110134	0.126171	0.00265376	0	0.0520531	0.00787981	0	0.0202711	0.0160002	0.0207829	0.0346774	0.0412348	0.000991535	0	0	9.31137e-19	0.014797	5.37428e-17	0.0396276	0.0037414	0.0177715	0.0679961	0.00668254	0.0338014	0.0132226	0
GSM484459	0.000621944	0	0.000119355	0.229057	0	4.40407e-18	0	0.00347587	9.12338e-19	1.06363e-18	0	0	0.0456172	0.0396645	0.0235399	2.61246e-17	2.27556e-18	7.56058e-20	0.0130017	0.00613323	0.00137425	0.0176027	9.40228e-19	0.039769	0.15181	0.00156306	0	0.0719152	0.00527132	0.0696663	0.0229297	0.0187848	0.0120925	0.0456516	0.0659445	0.00630333	0.00901832	0.00226421	0	0.0260155	0	0.0557886	1.69748e-19	0.0102478	0.0363757	0	0.0410646	0.0978254	6.88927e-18
GSM484463	0	5.22963e-18	0.065011	0.156341	2.05154e-18	0.00111157	1.26709e-19	0.0264355	0	0.00200282	3.65203e-19	0	0.071391	0.0284194	0.00563221	0	0.0106523	0.000753885	0.00225439	0.00507656	0.00433573	0.027182	0	0.0549865	0.16126	5.10818e-20	0	0.0815279	0	0.0951055	0.0165639	0.0145638	0.0190326	0.0381835	0.04563	0.00471943	0.0554566	6.6268e-19	0	0.0280278	5.22425e-18	0.0203662	0.00119214	0.00544795	0.0347532	0	0.0480281	0.0583975	6.38515e-18
GSM484466	0.00114186	3.0179e-18	0.0193612	0.206679	0	2.72278e-19	0	0.0227074	3.32316e-18	0.0410067	0.0275656	0.00127121	0.062899	0.0244826	0.00748703	3.22043e-18	2.9742e-18	0.000352097	0.00382363	0.010265	0.00237566	0.0109506	0.0100562	0.0468215	0.132948	0.000296723	5.23807e-19	0.0886277	8.5494e-19	0.0022367	1.06657e-19	5.90183e-19	0.0205335	0.0399125	0.0388741	0.00533198	0.0205345	0.00246223	0	0.0253536	0	0.0119144	0.00165661	0.00535379	0.0634802	0.020567	0.0341769	0.0481249	7.27408e-18
GSM484468	2.56783e-19	4.15355e-18	0.073718	0.225423	1.42878e-18	2.05368e-18	2.60095e-19	0.0306728	0	0.0151063	0.0101964	0	0.0634506	0.0311026	0.0103452	7.77458e-18	0.00103328	0.000244386	0.00828594	0.0146701	0.00272609	0.0136092	9.86751e-18	0.0746915	0.128389	1.92502e-19	5.65746e-19	0.0735481	0.00914471	0.0155905	0.00297422	0.00614998	0.0161593	0.038688	0.0483075	0.00510539	0.0643964	5.87943e-19	1.22433e-17	0.0245183	0	0.00357348	0.000363833	0.000137892	0.0522756	9.69165e-18	0.0548633	0.0596895	0
GSM484470	9.38251e-19	9.19586e-18	0.0564373	0.206526	1.38323e-18	0.000449504	0.00231209	0.0407711	0	0.058122	0.0366977	0.0147281	0.0666463	0.0396036	0.00812758	0	0.00520382	0.00346976	0.00114455	0.0030078	0.000920325	0.0127608	0	0.0758635	0.146563	6.41608e-19	6.22373e-19	0.0903031	0	0.0728238	1.53096e-18	2.2163e-19	0.0159071	0.0435653	0.0372981	0.00312884	0.0519153	7.46047e-24	0	0.0212633	1.20704e-17	0	0.00134551	8.39309e-19	0.0504085	1.8908e-17	0.0480168	0.0532432	0
GSM484472	1.726e-20	1.0344e-17	1.96103e-18	0.147646	0	5.91358e-19	0	0.00839161	2.20321e-18	0	0	0	0.0375339	0.0288694	0.0146962	0	0	0	0.00695856	0.0193041	0.0102022	0.0324046	0	0.0757552	0.211473	0	4.79005e-19	0.0814182	0	0.0942077	0.0127642	0.00388466	0.00943322	0.0447542	0.0674907	0.00714119	0	0	0	0.022924	5.6427e-17	0.0716033	0.000566702	0.016492	0.0226647	7.79589e-18	0.0413281	0.0735038	1.94862e-17
GSM484474	8.20616e-20	0	0.0103615	0.100012	1.9379e-19	0	0.021588	0.0230509	5.3163e-19	0.0153309	0.00252317	1.44282e-19	0.072181	0.0338378	7.37467e-05	1.75924e-18	0	3.42184e-20	0.0161227	0.0301562	0.00683127	0.00340593	7.81543e-18	0.0725006	0.140267	4.75447e-20	0	0.0498922	0	0.0823648	0.0131775	0.00200128	0.0164321	0.0350619	0.0716819	0.00375165	0.00948432	0	0	0.0149916	0	0.0690639	0.00204864	0.0118703	0.0312797	0	0.0467559	0.0942997	0
GSM484475	0	4.38454e-18	0	0.201883	2.99276e-18	4.36786e-19	0	0.0213591	2.30543e-18	0.00604373	0.00470547	1.12687e-18	0.0838558	0.0488515	0.00789773	1.37458e-17	2.73119e-18	0.00213464	0.00572088	0.00242944	0.00269049	0.0218659	0	0.0887813	0.179848	6.00176e-19	0	0.0852197	0	0.0604879	0.014663	0.0108659	0.0161248	0.0446862	0.0562779	0.00583106	3.08436e-19	0.00140248	0	0.0225864	0	0.024377	0.000338594	0.00673629	0.0339926	0	0.0375511	0.066268	1.1047e-17
GSM484478	0	1.02693e-18	0.0694761	0.202776	0	0.00706683	0.00232923	0.0268123	0	0.0354167	0.00517065	3.7442e-18	0.0686075	0.0398154	0.0108927	4.83458e-18	0.00530447	0.00141246	0.0121715	0.0157642	0.00507223	0.0106752	0	0.0592438	0.163036	0.000147297	5.12918e-21	0.0857505	0	0.0147792	0.00209774	0	0.0226336	0.0433276	0.0458385	0.00422714	0.0552467	0.00445178	3.24831e-19	0.023639	2.51426e-17	0.0270388	0.00536713	0.00685819	0.0707438	0.00313023	0.0387722	0.0463614	0
GSM484485	0	1.88471e-18	0.0176594	0.171257	0	5.65576e-19	0.00510282	0.0242127	1.86461e-18	0.0113787	0	0	0.0590768	0.0259373	0.0095262	1.45271e-17	6.10558e-19	0.00048935	0.00344194	0.00846738	0.00236381	0.0206289	4.67407e-18	0.0589699	0.141123	1.72578e-21	5.9362e-19	0.0745763	3.04251e-18	0.017421	0.00733469	0.00479134	0.014874	0.0431599	0.0690144	0.00275721	0.0186305	0	8.87216e-18	0.022517	7.82948e-18	0.0263905	0	0.000316101	0.0363135	4.25673e-18	0.0466081	0.129615	0
GSM484595	4.78116e-05	0	9.62965e-20	0.113164	0	0	0	0.0137054	4.62979e-18	0.00800857	8.33772e-19	2.03687e-18	0.0749143	0.0245674	0.00745551	0	0	7.01031e-20	0.0164395	0.00441832	0.011839	0.0239653	0	0.0527369	0.195061	6.3293e-21	0	0.109162	0	0.0434713	0.0142027	0.0115987	0.0111519	0.0385233	0.0584426	0.00197083	0.00934201	0.012719	2.36115e-18	0.0275829	0	0.0489238	0	0.00675423	0.0580653	6.19535e-18	0.0433429	0.104137	1.35728e-17
GSM484596	0	0	0	0.178999	0	6.07295e-18	0	0.00108534	0	0	0	0	0.0500634	0.0252049	0.0261848	5.59622e-18	3.7582e-18	0	0.00445643	0.024847	0.0070742	0.0177992	0	0.0721385	0.146222	0	3.61436e-20	0.0869186	0.0149759	0.152903	0.0212934	0.0148961	0.0178783	0.0390441	0.0539499	0.00320911	0.00917756	0.00836952	1.15968e-18	0.0232954	2.86208e-18	0.0382584	0.000258633	0.0142313	0.0345339	0.0062325	0.0307662	0.0573832	1.12177e-18
GSM484597	1.89497e-19	0	0.0492883	0.135507	0	0.00306564	2.14927e-18	0.0240619	0	0.0164268	0	1.91607e-18	0.0676447	0.0427445	0.00755666	0	0	0.000662288	0.0160779	2.30468e-05	0.00265871	0.026827	0	0.053919	0.187603	0	2.0016e-19	0.118659	0.0018091	0.118324	0.0132583	0.0101943	0.0167073	0.0437823	0.0715647	0.00132817	0.0492349	0	0	0.029336	2.16511e-17	0.0245529	0	0	0.00727092	0.0381185	0.0427308	0.146592	0
GSM484598	0.00198945	0	0	0.12515	0	0	8.44425e-19	0.00342822	0	2.90773e-18	0	0	0.0357028	0.0329673	0.0240424	0	0	8.73965e-20	0.0144072	0.025805	0.012564	0.0291104	1.46098e-19	0.0976652	0.203832	1.19994e-19	0	0.0964065	0	0.0384738	0.0199913	0.00869388	0.0184174	0.0474461	0.0793917	0.00308801	0	0.0040319	1.78678e-21	0.0334723	5.27316e-17	0.0669864	0	0.0149782	0.0295693	1.88483e-17	0.0116508	0.0807199	0
GSM484605	0	2.6427e-18	0.0259651	0.158274	7.90057e-18	0.0198191	0.00419807	0.0239533	0	0.0414485	0.00655634	0.0115047	0.0785669	0.0287583	0.0095123	0	0	0	0.00554036	0.0220947	0.0145776	0.0071778	0	0.0425641	0.0645903	0	1.73883e-18	0.0956886	0.0126171	0.142216	0.00267798	0.00190323	0.0152708	0.0368507	0.0379428	0.00313561	0.0310747	0.0020391	4.44688e-18	0.0268659	1.67107e-17	0.0362658	0.00120649	0.00835279	0.016184	0.0106891	0.0322546	0.066607	4.66711e-19
GSM484606	1.75321e-19	0	2.90379e-18	0.201626	0	0	1.63467e-17	0.00589503	0	3.72111e-21	0	1.72065e-17	0.0527012	0.0235175	0.0258587	2.03032e-17	1.66311e-17	8.43708e-19	0.0106337	0.0235829	0.0082439	0.0203029	3.23319e-18	0.0659385	0.160024	0	0	0.0866769	0	0.115756	0.0063003	0.00403804	0.0151675	0.0411333	0.060386	0.00192032	8.09884e-20	0	7.2664e-18	0.018299	4.43272e-17	0.0613022	0.00133575	0.0149425	0.0347093	1.14332e-18	0.0247062	0.0787137	0
GSM484610	0	1.63297e-17	0.0502941	0.154588	0	0	0	0.0248118	3.40228e-18	0.0242836	0.022526	0.0159282	0.0629062	0.0355346	0.00544974	4.64687e-18	0	0	0.0018934	0.000730717	0.0022165	0.0149777	3.46475e-18	0.0414786	0.118305	1.30764e-19	8.22128e-19	0.0975614	0.00508142	0.0556022	0.0061322	0.00644854	0.0199818	0.0437341	0.0531761	0.00214811	0.051002	0.00829986	3.11269e-18	0.0235296	0	0.0691042	0.00243757	0.000583689	0.0429355	0.0592076	0.0404019	0.0999249	0
GSM484611	5.16533e-05	1.88275e-17	0.0240528	0.151176	0	0	3.68727e-18	0.0124974	0	2.05608e-18	0	0	0.0321171	0.017147	0.00423358	0	2.58419e-18	7.51697e-21	0.0221447	0.0103884	0.00992188	0.0188223	0	0.066961	0.171081	0.00329314	1.62511e-19	0.0871745	0.0110405	0	0.0237772	0.0110097	0.00902803	0.0351837	0.0823834	0.00322294	0.0401966	0.00851627	5.00833e-19	0.0313403	4.50607e-17	0.0696532	0	0.0148305	0.0211767	0.0318484	0.0426873	0.107293	0
GSM484618	0	1.52312e-17	0.0182416	0.143549	1.62936e-18	9.11713e-20	0	0.0155638	0.000708487	0.0235004	0.0012858	0.00732739	0.0562373	0.0306285	0.00128757	0	0	0	0.00517006	0.0161657	0.0068968	0.0243971	9.96363e-19	0.0340222	0.159012	4.33845e-19	4.77404e-21	0.0979442	0	0.048581	0.00631504	0.00496708	0.0150201	0.0380103	0.0496891	0.00145246	0.0261726	0.00743261	4.0369e-18	0.0278406	6.76738e-18	0.0210837	0.00336392	0.0032875	0.0314054	0	0.0386071	0.0906353	0
GSM484619	0	3.63064e-18	0.0145082	0.162297	1.17914e-18	8.65507e-18	0	0.0111667	0	0.00528012	0	0	0.0536528	0.0244441	0.00489708	6.02988e-18	0.00273484	6.08541e-22	0.016652	0.0311185	0.0117826	0.00488465	1.89647e-17	0.0542889	0.109383	0	3.9108e-19	0.0889592	0.00398294	0.0658768	0.0194796	0.0105281	0.0183834	0.0360899	0.0488234	0.00250745	0.0246293	1.70658e-18	0	0.0108115	7.26255e-18	0.0619577	0	0.00560912	0.0463329	4.60018e-18	0.0470515	0.0587554	7.0433e-18
GSM484620	1.04248e-18	1.75426e-18	0.0545073	0.183004	6.45884e-19	0	0	0.0160163	0	0.000654119	8.0077e-19	0	0.0538109	0.0230747	0.00772788	0	0.00125295	0	0.00594694	0.00529657	0.00716508	0.00988168	5.39082e-18	0.0581344	0.139062	0	0	0.0970507	0.00324889	0.152285	0.0218849	0.0175731	0.0180756	0.0308356	0.0591126	0.00308468	0.0597499	0	4.46044e-18	0.0139582	6.82353e-18	0.0578166	0	0.00422356	0.0354795	1.07208e-18	0.0539016	0.0711942	1.17281e-18
GSM484621	1.61601e-19	2.00591e-17	0.0151521	0.177276	6.29624e-19	0	4.24576e-18	0.00615022	0	7.32409e-19	1.79952e-18	2.85781e-19	0.0383746	0.0174799	0.0306061	7.15123e-19	0.000359594	5.04995e-19	0.0113583	0.0249602	0.00592183	0.031227	0	0.11974	0.181018	0.000680993	2.83016e-19	0.0996225	0.0253055	0.00555465	0.0138373	0.00685507	0.0160488	0.0499089	0.0626832	0.00275268	0.042813	0.0108174	0	0.0277709	3.06598e-17	0.027014	0	0.0039453	0.0241408	1.38012e-18	0.0452612	0.0990705	2.97006e-18
GSM484628	0	1.6754e-17	0.0447977	0.195136	0	3.83468e-18	0	0.0254781	8.70878e-19	0.0439661	0.027385	0.0196666	0.0522077	0.0177164	1.12813e-18	1.88982e-18	1.10559e-19	0	0.0040136	0	0.00187785	0.00323341	0	0.0359177	0.062719	2.33542e-19	2.51847e-18	0.076662	0.00801722	0.0684735	0.0168213	0.0218576	0.0150044	0.0313974	0.0505276	0.00412198	0.0430844	0.00564486	0	0.00858644	5.35938e-18	0.0372374	0.000765743	0	0.054066	0	0.0527985	0.0651356	0
GSM484629	0	0	0.0411487	0.188776	0	0	3.34254e-18	0.0168393	1.0112e-19	0.0288324	0	6.53946e-19	0.0584714	0.0292027	0.0039866	5.36843e-18	2.21115e-18	1.40232e-19	0.00385147	0.0171798	0.00741068	0.0106514	1.04423e-18	0.0539754	0.143434	0	0	0.110091	0.0100545	0.101282	0.00491948	0.010618	0.0210462	0.036127	0.038409	0.000785652	0.0435489	0.0118322	0	0.0269818	6.73144e-18	0.0316694	0.00464195	0.00136576	0.0169475	2.25995e-18	0.0293451	0.0514993	0
GSM484630	0	2.33579e-18	0.0773105	0.182224	1.06415e-18	4.13692e-21	1.93432e-18	0.0223106	0	0.0363305	0.00858763	0.00893225	0.0757325	0.0368664	0.0124615	0	2.02448e-18	0	0.00206636	0.0270988	0.00415952	0.0130293	1.22945e-19	0.0461829	0.100176	0	0	0.100656	0.0030838	0.108532	0.00051801	0.00236108	0.013951	0.0491558	0.0473116	0.00230058	0.0662683	0.00726013	3.83806e-19	0.0220826	1.30226e-17	0.0223072	0.000318698	0	0.0185824	1.42507e-18	0.035037	0.0601172	0
GSM484631	0.00369159	0	0	0.171826	0	2.73287e-18	1.18129e-17	0	3.4834e-19	1.22253e-17	0	0	0.0288741	0.0177605	0.036319	0	8.96578e-19	2.58406e-19	0.00583553	0.0154395	0.00709672	0.0214932	0	0.0995663	0.139081	4.59105e-19	0	0.0927338	0.0107371	0.0424982	0.0220579	0.0184429	0.0117732	0.0473817	0.0515158	0.00383111	4.06098e-20	0.00575007	1.01643e-20	0.0368496	3.93324e-17	0.0687924	0.00105067	0.0169814	0.0341178	2.99632e-18	0.0267266	0.0458407	0
GSM484638	7.87898e-20	2.79577e-18	0.0129737	0.192996	0	6.46681e-20	1.63865e-18	0.0027543	4.5e-18	0.00105073	0	0	0.045785	0.025998	0.0184848	0	0	0	0.00713711	0.0278494	0.00516249	0.0065317	0	0.0828922	0.0941062	0	1.41445e-18	0.0897402	0.0180649	0.074556	0.0201119	0.017896	0.017151	0.0411009	0.0556948	0.00391	0.0190965	1.18697e-19	0	0.0167565	4.29037e-17	0.0472875	0	0.0053804	0.0362282	4.39752e-18	0.0311069	0.0634034	0
GSM484639	8.04991e-19	3.34612e-18	0.0972449	0.172548	1.08884e-18	1.06188e-20	4.06646e-19	0.0183598	0.000336641	0.047805	0.0133207	0.0122671	0.0732016	0.0253285	0.0117108	0	0.0200394	2.63245e-19	0	0.0206974	0.0106453	0.0134883	0	0.058468	0.110405	0	9.36269e-19	0.0948446	0.00693858	0.0882932	3.2747e-19	0	0.0211814	0.0502905	0.0249408	0.00343711	0.0842618	3.92298e-19	4.07085e-19	0.0250449	1.48994e-17	0.0171246	5.14202e-06	0.00283429	0.00487996	0	0.0489487	0.0474393	0
GSM484641	9.32769e-20	8.71445e-19	0.0751194	0.215279	0	3.49989e-18	7.80104e-18	0.0148924	3.71277e-19	0.0214126	0.0107136	0.0151875	0.0533281	0.0339367	0.0168091	0	0.00278043	0	0.00695091	0.017868	0.00260087	0.0143219	0	0.0729677	0.102609	0	0	0.0909718	0.0172973	0.0661511	0.00417968	0.00793591	0.0143848	0.0498835	0.0351245	0.00186709	0.0630761	0.000723514	1.45972e-17	0.030334	5.80432e-18	0.02113	0.00115452	0	0.0266901	0	0.041878	0.050671	0
GSM484642	0	4.43704e-18	0.0805575	0.167068	4.72e-18	0	0	0.0149159	0	0.0265699	9.18185e-19	0	0.0654072	0.0184575	0.0101433	0	0.0122534	7.21488e-19	0.0140683	0.0173186	0.00620149	0.0082766	4.18747e-18	0.0563786	0.147001	0	0	0.0896509	0.000277084	0.0597663	0	0.00475275	0.0159133	0.0361884	0.0498418	0.00303099	0.0754634	0.000594303	1.29644e-17	0.0307194	2.12205e-18	0.0270008	0.00132722	0.00550407	0.0359485	3.35911e-18	0.043385	0.0907377	0
GSM484645	7.46985e-19	0	0.0737935	0.150499	0	0	0	0.0158947	0.00235047	0.0199167	0.000179022	0	0.0510378	0.0164965	0.00906836	6.64947e-18	0	0	0.00830249	0.0259708	0.00831769	0.00769446	3.97405e-17	0.0539015	0.106477	0	3.47698e-19	0.0852922	0.00936234	0.0565849	0.00267266	0.00668536	0.0155564	0.0417643	0.0519066	0.00169031	0.0756218	0.00295625	0	0.0192979	1.73627e-17	0.0501637	0.00502048	0.00177744	0.0302419	0	0.0523784	0.0866657	1.68701e-17
GSM731200	5.43263e-19	0	0.00886831	0.144141	0	1.07963e-17	0	0.0362695	8.61194e-19	0	0.0381706	0	0.00802258	0.0205141	9.30624e-20	0	0.00517986	0.000914466	0.0246412	0.00155069	0.00265902	0.00760697	1.52378e-18	0.0625468	0.0768414	0.0038411	0	0.0526759	0.00620347	0.00931505	0.00943492	0.00289426	0.00304845	0.0404375	0.104265	0.00363452	0.00524516	4.3623e-19	0	0.0277395	3.21282e-17	0.051331	0.00145665	0.0127532	0.0442909	0.00919552	0.0422072	0.121965	0
GSM731201	3.0721e-19	0	0.024099	0.159309	1.53889e-18	0	0	0.0490608	0	0.0304171	0.0522968	3.77179e-18	0.0243004	0.0251819	0	4.96048e-18	0.00686516	0.000987303	0.0158845	0	0.00528608	0.015819	2.35884e-17	0.0318495	0.0601464	0	0	0.0564821	0	0.0936778	0.00338781	0	0.000991976	0.0517652	0.0916772	0.00362963	0.0129736	1.9615e-18	0	0.0225995	8.12691e-18	0.0366959	0.00100791	0.0066003	0.0166603	0.00630299	0.0325591	0.125419	8.95972e-18
GSM731203	6.62248e-19	4.10844e-18	0.0139948	0.180329	0	0	0	0.0317516	0	0	0.0110734	0	0.0109723	0.0277272	0.0312985	0	0.00521795	0.000309295	0.00944801	0	0.00510045	0.00488861	5.53555e-19	0.125543	0.0415651	4.37005e-20	2.31506e-19	0.032849	0.0223711	0.000446439	0.0205522	0.00857371	0.00738712	0.0433397	0.0488708	0.00459812	0.00480457	0	0	0.0155859	1.40494e-17	0.0545556	0.00213382	0.0136597	0.0497587	9.88612e-19	0.0340953	0.0218986	1.65479e-18
GSM731205	6.61033e-19	1.00839e-18	0.0262918	0.202006	0	0	0	0.0258483	0	1.43764e-19	0.0213411	7.66862e-18	0.0128175	0.0219448	0.00566102	0	0.00887158	2.37608e-23	0.018408	1.31644e-19	0.00141197	0.0134688	2.75578e-17	0.0664116	0.0500076	0.00203333	0	0.0488783	0.025494	0.0124149	0.0192251	0.0114042	0.00278651	0.0503921	0.0899304	0.00399499	0.0201294	0.00279595	0	0.02727	3.20982e-17	0.0213789	0	0.00839457	0.0263547	0	0.0339693	0.107306	0
GSM731207	0	0	0.08674	0.106847	6.92789e-19	6.71837e-19	3.79303e-18	0.0469997	0	0.0091476	0.0372654	0	0.0259132	0.0275569	0	6.72971e-19	0.0140681	0.00239181	0.00110833	0	0.00109534	0.0255139	1.64936e-17	0.0686565	0.046668	0.000879266	0	0.072793	0.0183057	0.0140032	0.0109545	0.0102648	0.00136226	0.049668	0.0569898	0.00397993	0.0570401	0	0	0.0275309	8.4814e-18	0.042897	0.0025046	0.00397973	0.0225496	0.0066012	0.0454553	0.0616116	3.3194e-18
GSM731208	0	7.63761e-19	0.00805171	0.160082	0	4.14605e-18	1.20986e-17	0.0367741	4.14164e-18	0.0181943	0.0662015	0.00662295	0.0326627	0.0366954	0.000638342	0	0.0152887	0.000889993	0.00897512	0.000542944	0.00281907	0.018528	0	0.0826272	0.0517766	0	0	0.0675317	0.0150879	0.0611053	0.0158731	0.00798628	0.00554461	0.0628969	0.0717999	0.00389069	0.0036163	0	4.3098e-18	0.0276631	0	0.0191005	0.001392	0.00656526	0.00752712	4.57442e-18	0.0373408	0.0553431	0
GSM731209	1.13007e-18	1.29698e-18	0.00611696	0.137788	0	0	3.74446e-19	0.0278595	0	0	0.00663387	9.66029e-18	0.0175759	0.036505	0.00407873	0	0.0164845	0.000748887	0.0202375	0.0137954	0.00423652	0.0283488	1.18386e-18	0.0872012	0.0718827	0.00112833	1.71991e-19	0.0536075	0.0176414	0.0647065	0.0151207	0.00550194	0.00116754	0.0524006	0.0859504	0.00658185	0.00345063	0	0	0.029985	0	0.0480331	0.00219497	0.015177	0.00588019	0	0.0418953	0.0727514	0
GSM731210	0	0	0.0411508	0.0862702	1.76104e-18	1.91569e-18	0.00982823	0.0421911	0	0.0186025	0.0531584	3.09046e-19	0.0166086	0.0206843	0	1.27904e-18	0.0205183	0.00180899	0.0122696	0.0203367	0.00910566	0.00147544	0	0.0841747	0.0360968	0.000788879	1.82784e-19	0.0413595	0.0172833	0.0481896	0.0115099	0.00137731	0.00077827	0.0454327	0.0876642	0.00314899	0.0227136	0	0.00163748	0.0217334	1.10945e-18	0.066381	0.000952223	0.0101312	0.0227462	0.0141624	0.044176	0.0900736	0.0105202
GSM731212	0	0	0.0385598	0.151383	0	7.39636e-19	0.00665122	0.0447573	0	0.0298959	0.0453633	0	0.0242183	0.0341174	0.00141513	2.79134e-18	0.0118116	0.0008592	0.0107912	0.000528558	0.00166237	0.0163342	2.81448e-17	0.057384	0.0364814	0.00118704	0	0.0553386	0.0106139	9.07671e-20	0.00461912	0.00140639	0.000304702	0.0570357	0.0903637	0.000661513	0.0195797	1.53753e-18	3.42059e-18	0.025871	4.47662e-18	0.0172774	0.000224994	0.0014751	0.0199739	3.25169e-19	0.0545048	0.129865	0.0154649
GSM914353	4.48704e-21	0	0	0.160951	3.0116e-19	0	1.40771e-17	0.00423297	0	0	0	0	0.04539	0.104425	0.0243601	0	7.23722e-19	0.00359905	0.0040718	0.0214647	0.0116131	0.0190346	1.6818e-05	0.0599482	0.1581	0.00178621	0	0.0962689	9.06969e-18	0.151727	0.0290562	0.0219761	0.0278587	0.0481842	0.0442974	0.00626011	0	0	7.49685e-19	0.0164769	2.63923e-17	0.0297387	0.00442313	0.0135579	0.0368925	2.56373e-19	0.0159945	0.0255957	9.05855e-19
GSM914354	0	4.91462e-18	0.0412815	0.0788722	5.54313e-19	0	0	0.00780161	0.0114974	0.0626391	0.0473545	0.0390313	0.044332	0.118995	0.00894244	0	0.0184564	0.0112027	2.49752e-20	0.0488938	0.0117156	0.0162426	5.76766e-19	0.00467357	0.165174	1.00274e-20	0	0.10418	1.22258e-19	0.212823	0.0102184	0.00601477	0.0243061	0.0440896	0.0181574	0.00489207	0.0573916	5.44341e-19	0	0.0163609	1.05731e-17	7.4272e-19	0.00594658	0	0.0603112	6.72761e-18	0.0452644	0.0065571	1.49546e-18
GSM914355	0	6.34444e-18	0.0382564	0.130988	5.46598e-19	0.00360806	0	0.00936855	0.0122146	0.0323852	0.0294622	0.000872616	0.0413583	0.0958763	0.00974667	0	0.0228488	0.0103444	0.0112737	0.0223216	0.00697403	0.0126778	0.0138072	0.0448961	0.169755	0	0	0.121823	1.46714e-18	0.174318	0.0132979	0.0143376	0.0174272	0.0446192	0.0404207	0.0047428	0.0522407	0	3.52951e-18	0.0196363	0	0.000147429	0.00524056	0	0.0746368	7.43135e-18	0.0760624	0.036015	0
GSM914356	0	2.58523e-18	5.18011e-20	0.0772187	0	2.31614e-18	0	0.00287833	0	0.0429091	0.0511609	0.0398715	0.0481963	0.0906515	0.0190793	0	0.00950101	0.013329	0.000432412	0.0371279	0.00166567	0.0249729	0.00313402	0.0566648	0.205394	1.42324e-19	0	0.116005	1.74512e-18	0.182639	0.0173518	0.0163953	0.0233226	0.0632401	0.0363334	0.00400389	0.0139442	0	5.44123e-18	0.0211277	0	0.0178678	0.00385431	2.70165e-21	0.0494817	9.11336e-18	0.038068	0.0319306	3.5948e-18
GSM914357	0	0	0.0043183	0.143204	0	1.02217e-19	0	0	0.00583194	0.038597	0.0238252	0.0242141	0.0401592	0.089398	0.0200418	6.81668e-18	0	0.0136579	0.00137072	0.0568707	0.00342548	0.0110261	0	0.0387449	0.174652	0.00303431	4.78745e-19	0.0859342	4.19311e-19	0.131973	0.0143275	0.0194432	0.0271028	0.0606414	0.0231303	0.00668454	0.0239557	0.0115776	0	0.00885866	0	0.00909614	0.00306351	0	0.0663404	0.00563539	0.0304899	0.00748508	0.00624231
GSM914358	1.34298e-18	2.8597e-18	0.0538455	0.0793149	2.23408e-18	1.27035e-19	1.26825e-18	0.025244	0.0140555	0.0695943	0.0461967	0.0365975	0.0485499	0.0741653	0.00728526	9.52043e-20	0.0412254	0.0070433	0	0.0305563	0.00491644	0.015091	1.02161e-18	0.0546817	0.121627	1.74541e-19	0	0.107669	6.30375e-18	0.118596	0.0139314	0.0096985	0.021342	0.0513556	0.0073799	0.00360474	0.0507452	0	7.13211e-18	0.0189506	0	0.0100125	0.00388544	0	0.034688	1.86828e-18	0.044694	0	2.35154e-17
GSM914359	3.29269e-19	5.56323e-18	0.0417918	0.099852	0	0	0	0.025588	0.00985314	0.0760936	0.0516278	0.0326339	0.0519516	0.0842066	0.00464024	1.07019e-17	0.0212408	0.00680446	1.83692e-19	0.0252712	0.00393364	0.0115033	0	0.0819078	0.159369	7.56389e-19	8.89719e-19	0.0972277	0	0.185684	0.0115649	0.00506715	0.0234292	0.0517247	0.0164471	0.00435906	0.0537218	2.5339e-18	6.3546e-18	0.0158393	4.74018e-18	0.0119111	0.00238709	3.38612e-19	0.0438552	1.39189e-18	0.0389992	0	2.87463e-19
GSM914360	3.40202e-19	0	0	0.105119	0	6.33962e-19	0	0.000341203	4.48488e-21	0.0434001	0.0218924	0.0164832	0.0643168	0.129492	0.0164174	0	0.0213461	0.00755738	0.0080069	0.0221698	0.00967583	0.0267709	2.00522e-18	0.0727551	0.243387	1.70717e-19	0	0.136334	0	0.155555	0.0158326	0.00543415	0.0313846	0.0540265	0.0437445	0.00479332	0.00190988	0	0	0.0164541	0	0.0405458	0.00466187	0.00414018	0.0351446	0	0.0576716	0.0293925	0.0145988
GSM914361	0	0	5.46858e-19	0.085453	4.30174e-18	0.00642793	0	5.15219e-19	0	0.0138726	0.0105967	0.00546498	0.0431883	0.120225	0.0145455	3.64853e-18	0.0152043	0.0104094	0.00211396	0.0281373	0.00419124	0.0189489	0.0196991	0.0279464	0.227376	0.0038241	0	0.122739	5.38951e-18	0.239148	0.030009	0.0196799	0.0371212	0.0359299	0.0315166	0.00657527	0.0125678	0.00397415	3.03666e-18	0.0117458	3.12646e-17	0.0902562	0.00135387	0.00451558	0.0748274	0.00587384	0.0249979	0.0228806	3.20259e-19
GSM914362	1.28304e-19	2.56369e-18	0.0438551	0.0916203	0	0	0	0.0278346	3.91235e-19	0.0772299	0.0562381	0.0677559	0.041934	0.0732344	0.00687285	0	0.0324242	0.00531702	1.17675e-19	0.0138286	0.0020517	0.00633986	0	0.0562075	0.117544	0	0	0.109936	0	0.193754	0.0226023	0.015981	0.0273442	0.0320527	0.00958764	0.00354615	0.0493931	0.00533667	0	0.00525991	0	0.0169392	0.00139614	6.84274e-05	0.0595847	7.60507e-19	0.0494585	0	0
GSM914363	3.90628e-20	0	0.0336328	0.101872	0	3.98128e-21	1.4574e-18	0	0	0	0.00124747	0.00185682	0.0575064	0.087482	0.0197111	0	0.0161967	0.0108994	0.0081038	0.0249089	0.0121964	0.0179401	2.56268e-18	0.0395585	0.220344	0.00301856	0	0.116911	0	0.141771	0.026286	0.0278362	0.0301502	0.0378477	0.0353772	0.0039665	0.056524	0.0165737	1.02055e-18	0.0157926	0	0.109999	0.00193644	0.00766023	0.0731796	0.0663796	0.0519986	0.0136522	0.0219023
GSM914364	1.387e-18	1.4646e-18	0.0405566	0.100676	3.22813e-19	5.44603e-19	1.69615e-17	1.59497e-20	0.00889643	0.0380371	0.0212674	0.0113707	0.0555014	0.092956	0.0166642	0	0.0407563	0.00952208	0	0.0485065	0.00680062	0.0153686	3.26228e-18	0.0460505	0.136855	0.00195688	3.08967e-22	0.0993619	5.27675e-19	0.247467	0.0295125	0.0273755	0.0263295	0.0395228	0.0249568	0.00481811	0.0472375	0	1.01549e-18	0.0212027	2.54826e-18	0.0416905	0.0023825	2.87437e-21	0.0302968	7.11356e-19	0.0647172	0.00296205	0.0152515
GSM914365	0	0	0.00687339	0.0962243	8.113e-20	0	1.76309e-17	0.00641513	2.72908e-18	0.0282187	0.0620987	0.0611888	0.0452693	0.0993075	0.00235317	1.33595e-17	0.0389488	0.00806311	0.000722536	0.023943	0.0158948	0.0300359	8.32577e-18	0.0272424	0.197229	3.26886e-20	0	0.126073	2.08038e-18	0.210341	0.0154063	0.00830118	0.0246416	0.0353466	0.0247351	0.0068444	0.0379336	0.000832127	7.07675e-18	0.0267813	8.87507e-18	0.0577034	0.00304646	0	0.0356922	3.47628e-17	0.0695299	0.00688051	0
GSM914366	0	4.19637e-18	0.0267026	0.0976782	1.89886e-18	0	8.06932e-19	0.00484714	0.00698618	0.0456105	0.0329434	0.0132641	0.0502037	0.124963	0.0126845	0	0.0227438	0.00733306	0.00136508	0.0164598	0.00374245	0.0234152	0	0.0558379	0.178201	0	0	0.120254	0	0.155029	0.0159248	0.0118475	0.0171362	0.0487269	0.0433248	0.00484962	0.0481208	0.0099916	4.05281e-18	0.0270897	0	0.0517341	0.00476184	0.00235176	0.0430408	9.73236e-18	0.0649056	0.0225999	9.68032e-19
GSM914367	0	8.86008e-19	0.0433019	0.103916	2.03222e-18	0.00205658	2.54808e-18	0.013064	0.000379273	0.0139607	0.0118231	1.93335e-19	0.0509355	0.122939	0.00171874	0	0.020669	0.0144676	0	0.0103593	0.00585954	0.0308313	3.15941e-18	0.0256441	0.195421	1.89798e-20	6.20208e-20	0.095018	1.75423e-18	0.12699	0.0245089	0.0147031	0.0233632	0.0292011	0.0269554	0.00468986	0.060481	6.8768e-19	7.34857e-18	0.0196449	3.96066e-18	0.0469267	0.0024418	0.0036683	0.0660664	0	0.0552351	0.0264954	1.36676e-19
GSM914368	1.69748e-18	2.04041e-18	0.0196868	0.0995438	3.26984e-18	0.00950746	1.79711e-21	0	0.00332845	0.028579	0.0289586	0.0195435	0.0444641	0.0902531	0.0124181	0	0.0261823	0.0113846	0.00849211	0.0355219	0.00897478	0.0116406	0	0.0268472	0.152164	0.00205733	0	0.120712	0	0.23474	0.0124831	0.011443	0.0218394	0.0470924	0.0551156	0.00392301	0.0324912	0.0115815	1.16949e-19	0.0140341	7.86778e-18	0.0388733	0.00526431	0.00525844	0.0600399	0.0127589	0.0470815	0.0504866	2.99606e-18
GSM914369	0	3.05574e-18	0	0.153682	0	0	1.37646e-17	0	1.59878e-18	0.00736129	0.0321919	0.0253302	0.0242975	0.0884058	0.00777444	0	0.00320453	0.0127587	0	0.0238475	0.0123627	0.0195112	3.47666e-18	0	0.198098	3.28875e-19	5.64073e-19	0.120913	7.95149e-18	0.28437	0.0186907	0.0211598	0.0195649	0.0438425	0.0375938	0.00599148	0.0365736	0.0139519	3.12183e-18	0.0283803	0	0.029351	0.0059564	0	0.0622293	0	0.0425081	0.0134071	1.89954e-17
GSM914370	0	0	0.0437878	0.059402	1.98107e-18	1.34161e-18	0	0.00600964	0.00822155	0.0323618	0.0299032	0.0277892	0.0598138	0.118908	0.0159478	1.18706e-18	0.0135722	0.0117852	0.00442342	0.0576662	0.00695277	0.0218742	0	0.0418293	0.194751	0	0	0.126758	0	0.190774	0.0151412	0.0152172	0.0254921	0.0612554	0.0277676	0.00280272	0.0557925	0.00321871	6.73823e-19	0.0186119	0	0.0324477	0.00476375	0	0.0415912	0.013752	0.0402932	0.0195766	0
GSM914371	1.57642e-19	0	1.33196e-18	0.126385	0	0	1.78661e-17	0.00948534	3.62833e-19	0.000401128	0.0449131	0.023512	0.0471296	0.152288	0.00556671	0	1.12723e-21	0.00224745	0.0147597	0.00740325	0.0120641	0.0297771	2.41151e-17	0.013695	0.192844	0	0	0.11743	0	0.133818	0.0203688	0.0218734	0.018457	0.0373075	0.0749177	0.00357948	1.19248e-19	0	1.39781e-18	0.0190155	0	2.45612e-19	0.0031194	0.00486535	0.0439292	5.14995e-18	0.0299281	0.0927201	0
GSM914372	0	1.05514e-18	0.0229255	0.0785533	0	1.06175e-17	9.41538e-18	0.010296	4.95242e-19	0.0330141	0.0328896	0.0196261	0.0443262	0.0873578	0.00151869	2.49135e-19	0.018578	0.00696645	0.000861322	6.42293e-20	0.00546131	0.0191334	2.17662e-18	0.026672	0.165252	3.70324e-19	5.88617e-20	0.0893406	0	0.0682207	0.0361884	0.0299811	0.0233027	0.0368813	0.0427968	0.00355202	0.0418567	0.00736917	0	0.0145388	1.20907e-17	0.0496326	0.00459384	0.00283444	0.0774948	2.3968e-17	0.0539734	0.0408666	0
GSM914373	2.17591e-18	4.84686e-18	0.0062275	0.0939834	0	0	5.83554e-18	0	0	0	2.34171e-18	1.42713e-17	0.0447589	0.100325	0.0123954	1.32227e-18	0	0.00954268	0.00705964	0.0227648	0.00833505	0.0266748	2.46322e-17	0.0765824	0.197095	0	0	0.0742798	1.2017e-18	0.143086	0.0367429	0.0146033	0.0222928	0.043459	0.0617953	0.00505628	0.0310736	2.87859e-18	0.00698525	0.011004	0	0.0675761	0.00980326	0.0151411	0.0238079	0	0.0327353	0.0525677	0
GSM914374	6.95707e-19	0	0.0509633	0.10949	4.13076e-19	0	0	0.00654207	0.00120432	0.0169449	0.0312735	0.0118109	0.0244963	0.0966251	0.00737155	0	0.0271177	0.0155379	0.00514902	0.017866	0.00229318	0.0133543	2.4407e-18	0.0381431	0.202371	0.00230815	0	0.103667	1.4978e-18	0.175211	0.0241462	0.0182533	0.018531	0.0445027	0.0678609	0.005184	0.0644626	0.00799104	0	0.0104438	0	0.0279601	0.00316084	0.000379408	0.0594782	0.0159193	0.0587769	0.0620564	0.00645251
GSM914375	0	0	0.0516312	0.144575	2.38771e-18	0	7.25147e-18	0.0118318	0.000139843	0.0459936	0.0405312	0.0337116	0.0407998	0.0797291	0.00728524	1.1349e-19	0.00219926	0.00570369	8.36541e-20	0.0123811	0.00261897	0.00809958	0	0.0402965	0.162623	4.81746e-20	0	0.0957942	0	0.0985404	0.0111339	0.012756	0.0204294	0.0406896	0.0271646	0.00288638	0.0619023	0.00431823	9.0131e-18	0.0122322	0	0.0300113	0.00324712	0	0.0656531	0	0.0428742	0.00557885	3.99585e-18
GSM914376	1.59667e-19	1.95928e-18	2.6571e-18	0.0947302	8.63269e-18	8.27509e-18	0	0	5.33939e-18	6.06457e-18	7.02832e-19	1.88712e-18	0.0322091	0.0866364	0.0244884	1.71103e-17	4.48343e-18	0.00611584	0.0111925	0.00460992	0.0142771	0.0291945	0	0.0538821	0.239665	0.00446028	0	0.0764214	0	0.12684	0.027079	0.0186693	0.0254103	0.0385998	0.0852622	0.00577862	0.0159409	0.00751476	0	0.0270983	1.97182e-17	0.101567	0.00852229	0.0120966	0.0268155	0.0181126	0.0400271	0.0660674	0
GSM914377	0	0	0	0.156445	0	6.75245e-19	8.78117e-18	0.0061197	1.54998e-19	0.0188611	0.031681	0.00690453	0.0500824	0.121345	0.0140837	4.31935e-18	0	0.0123905	0.00238514	0.0346029	0.00833824	0.0297435	7.91441e-18	0.0351949	0.172031	2.56141e-19	1.45325e-19	0.100119	0	0.101653	0.0168846	0.00849266	0.0210943	0.0555358	0.0435972	0.0033247	0.00714574	0	2.26544e-18	0.0248154	0	0.0709803	0.00581513	0.00214431	0.0442777	1.85154e-18	0.0383346	0.0369877	3.15134e-19
GSM914378	2.31045e-19	0	1.01139e-18	0.108497	1.27579e-18	2.22009e-18	0	0.00732557	0	0	2.96315e-20	1.45858e-18	0.0428232	0.119075	0.0263047	0	4.33284e-18	0.00474962	0.00686139	0.0182994	0.0109806	0.0307814	0	0.0674264	0.228127	4.54012e-18	0	0.0832823	0	0.191612	0.023199	0.00743153	0.0231009	0.0427207	0.0709247	0.00455991	5.02133e-18	0	0	0.0161138	1.43444e-17	0.0279865	0.00654473	0.0118135	0.025818	0	0.0208478	0.0761998	0
GSM914379	1.94471e-18	2.78408e-19	7.17971e-20	0.119755	2.77171e-18	0	0	0.00788912	0.00336873	0.0312261	0.0198163	0.0185791	0.0450949	0.0387269	0.0199571	0	0.00642547	0.00803131	0	0.0755507	0.00902823	0.00223776	1.82084e-17	0.0937102	0.145326	0	3.43827e-19	0.0789827	1.42021e-18	0.153424	0.00327434	0.00181389	0.0241936	0.0690029	0.0455277	0.00261994	0.0137159	0.00755388	7.62788e-19	0.00368556	0	0.0104219	0.00368091	0	0.0699531	0.014434	0.0264653	0.0322995	1.2127e-17
GSM914380	0	0	1.70518e-18	0.0430989	6.46396e-18	3.18671e-18	0	0	5.96539e-19	0	0	1.68013e-18	0.031433	0.0921489	0.002248	8.54455e-18	0.00754086	0.013089	0.00509281	0.025067	0.0173579	0.0288829	3.7827e-19	0.0243431	0.231906	0.000287846	0	0.118635	0	0.143788	0.0258603	0.0146296	0.0260626	0.0449957	0.0737678	0.00566791	0.0264616	0	2.75363e-18	0.0176066	1.75947e-17	0.0955487	0.0044498	0.00396603	0.0584127	0	0.039567	0.0868446	0
GSM914381	4.50856e-19	3.28357e-19	0.0260858	0.0931675	1.46979e-18	0.0209276	0	0.00577194	0.00721993	0.0579671	0.0413788	0.0251191	0.0751289	0.113174	0	0	0.00871396	0.0118943	2.75616e-19	0.0310084	0.00452162	0.0280854	1.40287e-17	2.76138e-18	0.20031	0	0	0.09102	1.06616e-17	0.168778	0.001289	0	0.0223936	0.0438435	0.0166971	0.00410015	0.0357502	0.00187562	2.2985e-17	0.0230482	0	0.0462323	0.0052601	0	0.0254982	1.03591e-18	0.0385478	0.00651193	0.0161143
GSM914382	0	1.03229e-18	0.1085	0.0935117	3.23698e-18	0.00517355	9.41816e-19	0.0113947	0.00840097	0.0465708	0.0355606	0.0153658	0.0602248	0.0969593	0.00423232	1.05902e-17	0.0640527	0.00530738	0.000314966	0.0066442	0.00913345	0.0205665	1.57179e-17	0.0458037	0.173724	0	0	0.105068	0	0.0882891	0.0214442	0.00909331	0.0226089	0.0401076	0.00815114	0.0033728	0.0917884	2.87289e-20	0	0.0170971	0	0.0173943	0.00503507	0.010824	0.0710234	1.98851e-17	0.0618887	0	8.79287e-19
GSM914383	0	2.86649e-18	0.0324307	0.119584	0	4.54769e-21	2.33415e-18	0.0094072	0.0156502	0.0529362	0.0304676	0.00992971	0.0685211	0.0972004	0.0185581	4.95979e-19	0.0252049	0.00741406	0	0.0237772	0.00990073	0.0269959	7.28186e-18	0.0648833	0.181685	0	3.5105e-19	0.117204	2.47892e-18	0.173733	0.0210861	0.0145428	0.0266372	0.0469483	0.0202323	0.00364757	0.0428586	0	0	0.0230386	3.15772e-17	0.027543	0.00501674	0.00347307	0.0320335	0	0.0588677	4.32752e-19	0
GSM914384	1.04197e-18	0	0	0.119508	0	0.0157445	1.01154e-17	0.0061795	0.0119995	0.0394607	0.0232455	0.0173319	0.0682333	0.135165	0.0203	1.27932e-18	0	0.0233639	5.7448e-21	0.0415027	0.0034085	0.0410569	0	0.0368472	0.238313	0	0	0.115121	0	0.231351	0.00357225	0.000446982	0.0203842	0.0485832	0.0312586	0.00465317	0.0213196	0	1.4617e-17	0.0296589	0	0.0246765	0.00565112	4.02238e-18	0.0436331	6.60314e-18	0.0452964	0.0283727	0
GSM914385	2.73393e-18	0	0	0.171696	2.30733e-18	0	0	1.79266e-21	6.39135e-20	0.000618409	0.00990633	0	0.052734	0.0830073	0.0180817	0	0.013155	0.00411201	0.0031774	0.0236826	0.00512184	0.0129949	4.8519e-17	0.0656772	0.188596	0	2.65729e-20	0.0842837	2.95154e-19	0.225438	0.0372255	0.0165117	0.0243975	0.0325487	0.0417363	0.00534454	0.015293	1.04484e-18	0	0.0189376	2.30896e-17	0.0680581	0.00291421	0.00777841	0.0539192	0.0218746	0.053276	0.00419815	6.34319e-18
GSM914386	5.81489e-19	1.39102e-17	0.00577657	0.109929	0	2.69638e-19	6.37746e-18	0	0	0	0	0	0.0486712	0.0913252	0.0137184	1.40587e-17	0.020294	0.00681961	0.00901034	0.0201304	0.00723107	0.0241363	1.69934e-18	0.0631505	0.181903	0.00176537	0	0.103654	2.25639e-18	0.101388	0.0326032	0.0160249	0.0241962	0.0440377	0.0472988	0.00471898	0.0270594	3.08143e-18	3.33977e-18	0.0148348	0	0.0872738	0.00293295	0.00726705	0.0615258	0	0.0529936	0.0290555	3.23584e-18
GSM914387	0	1.78138e-17	0.00104877	0.209174	5.64769e-18	0	8.57854e-18	0.0143105	0	0.0299704	0.0551031	0.0471571	0.0378147	0.0472123	0.0391555	1.84407e-18	0.0137315	0.00246223	0.00302747	0.00644625	0.00731337	0.00523537	6.92084e-18	0.0631092	0.122102	0	0	0.111879	0.0084302	0.23736	0.020953	0.0282072	0.0203325	0.0376154	0.0315062	0.00278782	0.0182113	0	1.71719e-17	0.00436025	0	4.43037e-19	0.00304321	0	0.0764146	0	0.0611842	0.00291719	0
GSM914388	0	0	5.96023e-19	0.0935052	0	0	1.0366e-17	0.00626287	0.00977488	0.0536205	0.0232791	0.00802848	0.0654449	0.100356	1.87752e-19	2.02016e-18	0.0144556	0.00169921	0.00268524	0.00548839	0.00997352	0.0231719	3.01354e-18	0.0492477	0.207651	0	0	0.10724	0	0.0931094	0.0227346	0.00666479	0.0234346	0.0361361	0.0405568	0.00343782	0	1.11467e-19	0	0.0112654	1.27816e-18	0.0365718	0.00498934	0.0125882	0.0401982	0	0.0464286	0.0145732	8.79625e-18
GSM914389	0	1.44857e-18	3.45198e-20	0.174808	0	0	1.56596e-17	0.00877713	0	0.0413348	0.0224514	0.035846	0.0608934	0.108434	0.0070873	1.27249e-17	0.0016338	0.0027989	5.32068e-19	0	0.00345556	0.0146925	1.16595e-18	0.0305497	0.14211	0	1.46597e-18	0.106761	0	0.209786	0.0254958	0.0148554	0.0236598	0.0371262	0.0296835	0.00273842	0.0118558	4.99975e-19	1.86074e-19	0.0136769	5.53546e-18	0.0396298	0.00390072	0.00382409	0.073811	2.04599e-17	0.0381217	0.00191922	0
GSM914390	0	0	0	0.0889953	0	4.09652e-19	0	0	8.20285e-20	0.0099231	3.97153e-19	3.87881e-18	0.0535389	0.0616807	1.01887e-20	3.31305e-18	0.0101117	0.00201542	0.0180573	0.00713643	0.00613439	0.032946	4.99831e-17	0.0592271	0.255305	0.00187241	0	0.102384	6.28209e-18	0.11528	0.029628	0.0111066	0.0217397	0.0455653	0.0781183	0.0032935	1.35525e-20	0.0032977	0	0.0164286	1.07066e-17	0.0536328	0.00559586	0.0161127	0.0349917	0	0.0464216	0.0698675	1.76021e-17
GSM914391	0	4.50576e-19	0.04287	0.119202	0	1.16373e-19	0	0.00560514	0.015561	0.0356788	0.0264751	0.0159698	0.0344188	0.0759525	0.0131599	0	0.0187763	0.0108194	0.00203732	0.0264007	0.00417582	0.0113726	4.20328e-18	0.0201257	0.175512	0	7.89817e-19	0.0748409	7.24413e-19	0.199692	0.0137378	0.00692409	0.0268007	0.0437242	0.0503215	0.00455553	0.0599026	0	9.47378e-18	0.0114806	9.41001e-18	0.0558825	0.00497511	0.00433348	0.0586465	0	0.0413348	0.0343917	0
GSM914392	0	1.71411e-17	0	0.110994	5.5036e-18	0	0	0.00322471	0.0118179	0.0218213	0.0249922	0.00292742	0.0495265	0.158128	0.0124204	2.44858e-18	0.00421437	0.0074341	0.00288041	0.03547	0.0031715	0.0248349	0.00707255	0.0425444	0.219934	5.68478e-19	0	0.116033	0	0.152971	0.0109472	0.00586073	0.022072	0.0432116	0.044246	0.00469308	0.0213649	0.00714063	7.32957e-18	0.0262185	0	0.0486046	0.0038694	0.00167744	0.0517892	0	0.0511825	0.0206255	0
GSM914393	1.06953e-18	3.06779e-18	0.0410207	0.116628	3.71463e-18	0.00469527	0	0.0188313	0.0209567	0.0675211	0.0383971	0.0238346	0.0444302	0.0764206	0.00379107	4.84888e-18	0.0155601	0.00888909	0	0.00565944	0.00489131	0.00424002	1.44961e-18	0.0515433	0.135493	0	0	0.122623	0	0.155228	0.0211001	0.0157357	0.0227042	0.0388806	0.0224889	0.00303004	0.0496996	0	1.79438e-18	0.00439387	1.59832e-17	0.0292155	0.00234944	0.00437072	0.074995	8.73183e-18	0.0480047	0	0
GSM914394	0	4.04481e-18	0.0943819	0.127795	0	8.31502e-19	4.05825e-18	0.00746034	0.00725073	0.0551724	0.0484882	0.0326542	0.041252	0.0735189	0	4.01908e-18	0.0514039	0.00484319	0.00240246	0.00905768	0.00972235	0.010507	0	0.00434842	0.137886	4.21466e-19	0	0.117455	0	0.171064	0.0103494	0.00772439	0.0278775	0.04357	0.0260199	0.00450239	0.0932418	0.00532175	3.79991e-18	0.00981142	7.04025e-18	0.0131072	0.00362288	0.00260033	0.0644179	0	0.0580229	0.00397839	0
GSM914395	0	3.95808e-18	0.0477415	0.0885847	3.05562e-18	0	0	0.0227672	0.0044525	0.0480506	0.0496559	0.0248181	0.0333919	0.0668665	0.00541124	0	0.0407592	0.00800352	2.56464e-20	0.0188858	0.00472359	0.0089135	0.0371451	0.0382519	0.115188	5.82032e-19	0	0.10712	0	0.124792	0.0113559	0.00910729	0.0227036	0.0435484	0.0298672	0.00412284	0.0606046	0.00652337	0	0.0136245	8.16071e-18	0.0301089	0.00257791	0	0.0491368	0	0.0302645	0.0195469	7.55924e-19
GSM914396	0	0	4.75682e-19	0.129996	0	0	2.53921e-17	0.00855887	0	0.0151829	0.0266444	0.0203586	0.0311151	0.0625334	0.00760898	0	0.0166494	0.0014896	0.00303913	0.00874483	0.00733717	0.00483222	3.94078e-19	0.045011	0.13295	0.00213537	0	0.0730855	0	0.095666	0.029369	0.0240688	0.0214857	0.0329397	0.0424133	0.00514227	0.0132498	0.0066005	0	0.0105843	0	0.0361837	0.00133522	0.0119103	0.0654843	0.0185029	0.0399007	0.0229215	3.27688e-18
GSM914397	6.86387e-19	4.89139e-18	0.0827502	0.129181	5.98718e-18	9.10087e-19	8.53536e-18	0.0228542	0	0.0612964	0.0590716	0.0372535	0.0515516	0.0828613	0.00266043	1.12713e-17	0.071153	0.011576	0	0.0050493	0.00492371	0.018424	0.0184401	0.0381586	0.144591	1.20902e-20	1.09142e-18	0.114174	0	0.148266	0.0122662	0.00398806	0.0290407	0.0451837	0.0229827	0.00508607	0.0868221	0	0	0.0211805	6.09465e-18	0.0137958	0.00248942	0.00275267	0.041851	0	0.0568609	0.00965696	0
GSM914398	0	5.40175e-18	0.0259394	0.109658	5.21399e-19	0	0	0.00329957	0.00541934	0.0266606	0.00777287	0.00772294	0.0472549	0.123303	0.00988961	2.26341e-17	0.0217925	0.0112432	0.00149301	0.0196261	0.0165488	0.0275187	0.0433534	0.0119255	0.193616	3.47793e-19	0	0.141171	0	0.229087	0.00922706	0.0111683	0.0247728	0.0493263	0.0430261	0.00666655	0.0647072	1.04306e-18	8.25483e-18	0.0352651	2.37936e-17	0.0185394	0.0037828	0	0.04847	4.24944e-17	0.0475801	0.0655965	0
GSM914399	3.8349e-19	2.16071e-18	2.20225e-19	0.164532	0	0	0	0	1.04966e-18	0	5.03639e-20	2.91059e-19	0.0521496	0.0677122	0.0199844	0	0.00669197	5.91143e-20	0	0	0.00399443	0.0194998	3.87275e-18	0.0985447	0.19142	1.07936e-18	0	0.100663	0	0.167656	0.0353616	0.0271156	0.0280677	0.0366634	0.0258342	0.00550409	0	0	0	0.0112176	3.04739e-17	0.0175213	0.00199733	0.00994767	0.058822	8.02917e-18	0.0332468	0	0
GSM914400	0	2.09758e-18	0.0186415	0.126432	1.03923e-18	3.43619e-18	0	0.00330849	0	0.0262516	0.0283983	0.0212382	0.0316467	0.0425956	0.00804912	0	0.0390742	0.00309352	0.000574684	0.0124445	0.00699188	0.012874	0.00768546	0.0129466	0.122752	0.00277381	0	0.113061	0	0.179119	0.0166883	0.021327	0.0243606	0.0379221	0.0414549	0.00508141	0.0340443	0.0145908	0	0.00944633	8.99256e-18	0.0361765	0.000845689	0.00437855	0.0772455	0.0142255	0.0535794	0.0288785	0
GSM914401	0	5.0174e-18	0.143244	0.130389	0	0.021946	3.37316e-18	0.022379	0.00519049	0.0610202	0.043953	0.0244049	0.0520254	0.0704756	0.00409058	0	0.0262221	0.0136493	1.67231e-18	0.0177022	0.000153532	0.00759432	0	0.0399281	0.0925463	0.00151604	0	0.0962619	0	0.154228	0.0130564	0.0121632	0.0256461	0.0368502	0.00523641	0.00387804	0.113055	0	4.90677e-18	0.00758989	1.01524e-17	0.0124826	0.00262597	7.69892e-20	0.0632476	0.00848008	0.050949	0	0
GSM914402	0	4.43028e-18	0.0901878	0.130659	2.6858e-18	0	1.07967e-17	0.0177145	0.00755279	0.0515617	0.0345015	0.0271811	0.0448142	0.092569	0.00530833	0	0.0372312	0.0109996	0.000302486	0.00226302	0.00213849	0.014442	0	0.0189781	0.130701	1.71889e-19	1.4744e-19	0.10492	0	0.233381	0.0138357	0.0126368	0.0247994	0.038182	0.0215945	0.00501949	0.0930111	3.30949e-19	4.25608e-18	0.017217	5.13901e-18	0.0138399	0.0034642	0.00119596	0.0523954	0	0.0571075	2.35426e-19	2.49432e-18
GSM914403	2.96522e-19	0	0	0.138146	6.65191e-18	4.9716e-19	0	0	5.02169e-18	0.00242924	0.0134052	1.11936e-19	0.0579551	0.122544	0.0207887	0	0.0105922	0.00523902	0	0.0108188	0.0125722	0.0230666	0.0187021	0.0463562	0.198372	0.000554058	7.29857e-19	0.0689095	0	0.142725	0.0177362	0.0114127	0.0205373	0.0355836	0.0432924	0.00658874	0.00764774	0	0	0.025033	6.61936e-18	0.0580534	0.00598699	0.0157013	0.0245547	0	0.0268073	0.015479	0
GSM914404	4.76103e-20	4.6183e-18	0.0375206	0.130693	0	6.68437e-19	1.09249e-17	0.00155866	0.0019759	0.0451275	0.0351442	0.036678	0.029443	0.0783373	7.53468e-05	0	0.0244058	0.00400332	0	3.26986e-19	0.00558829	0.00837272	0.0130829	0	0.105646	0.00238527	0	0.085921	0	0.164158	0.0130478	0.0226269	0.0198231	0.0421142	0.0250928	0.00569603	0.0513576	0.00781148	0	0.00883068	0	0.0250979	0.00221909	0.00271297	0.0458783	0.000397402	0.0323261	0.0056451	7.3634e-19
GSM914405	0	2.46462e-18	0.0294846	0.099325	0	3.00178e-18	0	4.89149e-20	0	0.0309986	0.0194706	0.0224675	0.0286547	0.0467618	0.0102095	0	0.00995177	0.00529868	0.00662087	0.00696006	0.00360273	0.00533939	0.024278	0.0211861	0.137314	0.00239207	0	0.109567	1.16801e-19	0.174189	0.0315608	0.0290262	0.0171103	0.0410401	0.0568146	0.00514726	0.0456959	0.00468821	0	0.00569334	1.59894e-17	0.0258029	0.000467722	0.00673895	0.0644853	0.0164652	0.0351413	0.0566592	1.88009e-18
GSM914406	0	3.25023e-18	3.16048e-19	0.113268	0	0	0	3.51331e-19	0	4.6e-18	0	9.7937e-18	0.0273077	0.0744729	0.0090622	0	0.00423123	0.00968252	0.011512	0.0199701	0.00535017	0.0215962	0.0549615	0.00273037	0.198947	0.00374237	0	0.111442	0	0.119986	0.0296642	0.0220717	0.0195133	0.0354006	0.0757345	0.00637563	0.0252478	0.00845979	0	0.0150429	1.3598e-17	0.0637732	0.00323263	0.013654	0.0498303	0.0323688	0.0482085	0.0708254	1.20359e-17
GSM914407	5.42567e-19	4.35808e-18	0.0170499	0.136967	4.21172e-18	0.00289609	0	0.00386678	0.00484713	0.0346463	0.0286976	0.0102154	0.034465	0.105702	0.0400141	0	0.0130905	0.0105914	0	0.0504484	0.00678854	0.0215138	0	0.0631187	0.196659	0.00305642	2.74376e-19	0.0983837	0.000658738	0.183353	0.0166367	0.0143294	0.0280563	0.0545724	0.0188716	0.00703221	0.0427696	0.0172272	2.16854e-18	0.0192716	0	0.0275107	0.00239563	3.39949e-19	0.0389786	0.00863246	0.0321883	0.00426133	0.00435975
GSM914408	0	1.34365e-17	0.0384218	0.162527	4.03372e-18	0	0	0	0	0.0211595	0.0234351	0.00801986	0.026086	0.0615801	0.018723	0	0.0143572	0.00694643	0.00281534	0.0125763	0.00287003	0.0143586	0	0.0082052	0.136203	0.00307561	0	0.0965209	0	0.17739	0.018131	0.020149	0.020777	0.0368677	0.0366288	0.00620027	0.0584918	0	5.70502e-19	0.0133526	2.45268e-18	0.0271702	0.000672562	0.00747579	0.064222	0.00218283	0.0464517	0.0260352	0.0134109
GSM914409	0	0	0	0.124172	9.72274e-19	1.09534e-19	2.48305e-19	0	0	0.0157236	0.0110752	0.00893887	0.0266094	0.091974	0.0275657	0	0.00457912	0.00913709	0.0132749	0.0146201	0.00665238	0.00736841	0.0030612	0.0424261	0.157179	0.00195639	0	0.116251	1.65026e-19	0.194773	0.0191775	0.0232825	0.0197514	0.0446484	0.0605096	0.00593729	0.0127459	0.000410493	0	0.0114879	2.77218e-17	0.0402661	0.000725113	0.0102299	0.0609936	2.29821e-19	0.036064	0.0528256	0
GSM914410	1.4019e-18	0	0.123299	0.0972641	0	6.27495e-18	9.47615e-19	0.0102482	0	0.0247151	0.0387988	0.0235306	0.045807	0.0761121	0.0204065	0	0.0525163	0.00580265	0	0.0274609	0.00891206	0.0132932	0	0.0712638	0.13092	0.00159761	8.86033e-19	0.0891823	1.09192e-18	0.132537	0.0180895	0.0168542	0.023729	0.0378162	0.0171617	0.00728464	0.103174	0.00472296	8.86273e-19	0.00815207	0	0.0664172	0.00168273	0.00786079	0.0517884	0	0.0509854	0	3.30603e-18
GSM914411	3.81277e-19	1.52253e-18	0	0.0832787	0	0	0	0	1.31428e-19	5.19182e-19	0	1.25631e-17	0.0286728	0.0689877	0.0184306	0	0.0138008	0.00459991	0.0106447	0.0179275	0.00759289	0.0173585	6.27898e-20	0.0494326	0.172733	0.00462807	0	0.0903406	5.38363e-20	0.120629	0.0352047	0.0253024	0.029091	0.0384761	0.0630971	0.00670473	0.0149025	0.00465621	0.00237668	0.0104676	1.2751e-17	0.0641384	0.000930685	0.0157697	0.0596575	0.0195986	0.0305777	0.0728668	0.021332
GSM914412	1.31648e-20	3.26075e-18	0.0115348	0.0964053	0	0	5.34322e-18	9.56216e-19	0	4.41461e-20	0	1.03518e-17	0.030502	0.0660636	0.0206064	0	0.016722	0.0115415	0.00553937	0.0187317	0.00952913	0.00704795	1.98675e-19	0.0286219	0.172129	0	1.5482e-20	0.08421	0	0.168954	0.0265517	0.0152401	0.0270341	0.0336197	0.0541882	0.00749008	0.032763	0.011985	0.00654456	0.00723132	0	0.076658	0.00158337	0.0199701	0.0755798	0	0.0371789	0.0347022	2.33513e-18
GSM914413	0	5.70624e-18	0.0652285	0.163968	0	6.35659e-19	0	0.00318092	1.14863e-18	0.043442	0.0336671	0.0187883	0.0397472	0.0503601	0.0214504	1.16232e-17	0.0391865	0	0.00276135	0.00953572	0.0074963	0.0221799	0	0.0298113	0.166214	0	2.60571e-21	0.0974233	0	0.236165	0.0226633	0.00736768	0.0283131	0.0354319	0.0391429	0.00429731	0.0699443	6.44796e-19	0	0.00844907	0	0.0228868	0.000764612	0.000382205	0.0389164	2.76447e-17	0.0545105	0.0392542	0
GSM914414	0	4.31116e-18	0.100002	0.0698999	0	0.0151482	0	0.0130816	0.0333054	0.0847552	0.0450123	0.0235024	0.038404	0.0684596	0.0108371	0	0.0189697	0.00562749	0	0.0116825	0.00706974	0.00586872	2.29648e-19	0.0318108	0.133913	0	0	0.0960335	0	0.125928	0.00999464	0.00929532	0.0148091	0.0358478	0.0256117	0.00429876	0.0830055	0.0105033	1.01724e-17	0.012619	1.33684e-19	0.00800408	0.00260545	0.00606508	0.0447186	1.76076e-19	0.0519248	0.0104305	0.0104768
GSM914415	3.50569e-19	3.75867e-18	0	0.0937694	0	0	0	0.00876799	0.00672206	0.0263535	0.0217604	0.00481446	0.0614129	0.109542	0.0232408	4.20027e-18	0.00280277	0.00822682	0.00721433	0.0288826	0.0121945	0.0146852	1.67547e-18	0.0842626	0.142286	0	0	0.103019	2.04323e-18	0.168584	0.0298497	0.0266966	0.037021	0.0511738	0.0469928	0.00461782	3.01442e-19	9.44391e-19	0	0.0179466	0	0.0567493	0.00157616	0.000573762	0.0269451	1.00925e-17	0.0359234	0.0509855	0
GSM914416	7.15388e-19	5.21017e-18	0.0203765	0.123992	0	0	0	0.00435565	0.00701102	0.0379492	0.0179399	0.00563091	0.0437939	0.0927148	0.0120848	1.05776e-17	0.0387903	0.00827043	3.81164e-19	0.0204417	0.00366597	0.0222454	1.81283e-18	0.0283411	0.16007	1.33545e-18	9.60092e-19	0.109649	3.59676e-18	0.173739	0.0250425	0.0143877	0.0239343	0.0360087	0.0294884	0.00465601	0.0367893	0	2.51949e-19	0.0254001	4.55872e-18	0.0423142	0.0017525	0	0.0322741	1.49298e-17	0.0638846	0.0270011	0.042947
GSM914417	0	7.4996e-18	0.0102479	0.128248	0	1.32485e-17	2.77696e-18	0.029609	4.54544e-18	0.0658956	0.0781173	0.0572236	0.0438988	0.096391	0	5.46425e-18	0.0151176	0.00519447	0	0	0.00218221	0.0122677	0.00976317	0.0263042	0.0939772	1.58459e-18	1.79596e-19	0.09476	0	0.129836	0.018376	0.0199914	0.0170795	0.0291522	0.0348449	0.00320494	0.0230521	0	0	0.018319	0	2.04771e-20	0.00222957	3.74872e-19	0.0604328	9.93671e-18	0.0430041	0.00941975	0.00742422
GSM914418	0	4.4355e-18	0.0390485	0.125244	4.25817e-18	2.97602e-19	0	0.00193211	0	0.00447968	0.0116725	0.00797015	0.0234202	0.0449847	0.0128769	0	0.0258482	0.00221977	3.68392e-21	0.00588272	0.00360768	0	0	0.0584342	0.0909812	3.46799e-19	0	0.0873615	0.0117894	0.255293	0.0382086	0.0283232	0.0182213	0.0323362	0.0451772	0.00426975	0.0398695	3.46593e-18	0.00193073	1.25827e-20	6.86616e-19	0.0429411	0.000933786	0.0131386	0.0662265	3.86146e-18	0.0560065	0.0325205	0
GSM914419	1.96413e-18	5.58727e-18	0	0.131298	0	1.24e-17	0	0	0	0	4.3561e-19	0	0.0233634	0.046957	0.0177637	0	0.00643103	8.98224e-21	0.0140757	0.0135819	0.00777131	0.00349437	0	0.0351475	0.170892	0.00249757	0	0.0551905	0	0.186825	0.0368148	0.0261308	0.0199554	0.0334383	0.0738926	0.00441651	0.0159699	0	0.0027783	0.00350323	0	0.0538158	0.000562481	0.0252733	0.0510455	0.0125662	0.0288783	0.0550816	0
GSM914420	0	1.85947e-17	0.00278404	0.158198	2.25471e-18	0	0	2.65577e-19	1.30332e-18	0	0	8.90496e-18	0.0294764	0.0808905	0.0544829	0	0.0201356	0.00458357	0.00422492	0.0337139	0.012275	0.0227522	8.23937e-18	0.0562465	0.184834	0	3.75195e-19	0.0898754	0.00313066	0.193661	0.0253227	0.0172261	0.0192576	0.0518113	0.0504798	0.0064831	0.0295934	0.00609163	1.83722e-18	0.0121087	3.10673e-17	0.0458509	0.00202398	0.0158407	0.0457129	7.77089e-18	0.0423577	0.0305872	5.33719e-18
GSM914421	6.1143e-20	3.11402e-18	0.0102734	0.0702362	0	0	0	0.00660243	0.00954168	0.0452571	0.0316006	0.0277821	0.0448862	0.0879003	0.0146655	0	0.00695826	0.0139566	7.52159e-05	0.0319026	0.01253	0.0185234	2.46013e-18	0.0335095	0.159131	6.3784e-20	2.17942e-19	0.109595	2.90621e-18	0.169726	0.0138155	0.0202182	0.0218197	0.0502245	0.0379316	0.00396193	0.0332553	0.0171656	2.51003e-18	0.015065	9.39268e-18	0.0028578	0.00208645	0.00123766	0.0429502	0	0.0348206	0.0385924	0
GSM914422	0	0	0.166865	0.0949973	8.61372e-18	0	1.65423e-17	0.00609666	1.59659e-18	0.0262724	0.0524312	0.0523783	0.0242213	0.0562598	0.006155	8.13461e-18	0.0890969	0.00188059	2.57105e-19	0.00180439	0.00831523	0.0116096	6.60977e-20	0	0.0872269	0.00346016	0	0.0848322	1.7474e-18	0.13325	0.00962727	0.021048	0.018838	0.0340193	0.0122609	0.00465128	0.12588	0.00402682	1.7006e-18	0.0150034	0	0.0172863	0.00174891	0.00779778	0.0789664	0.0112867	0.0599362	2.8437e-18	0.00310522
GSM914423	0	0	5.68421e-19	0.104768	0	1.38528e-18	1.05447e-17	0	0	0	7.34166e-19	2.11562e-18	0.0176272	0.0466873	0.033285	0	1.77557e-18	0.00522932	0.0025464	0.0223039	0.011944	0.00759069	4.76282e-18	0.0798641	0.135056	0.00109354	0	0.0889955	0	0.127015	0.0317781	0.025969	0.0231608	0.0404258	0.04342	0.00544739	0	0.00767155	0.00404891	0.0158221	1.92908e-17	0.0360417	0.000561491	0.0133556	0.0606378	0	0.0353973	0.0212464	0
GSM914424	0	2.90454e-18	0.0273651	0.14276	4.06563e-18	0	0	2.62454e-19	3.16237e-19	0	0.00772184	0.0019135	0.0257759	0.0553717	0.0231509	0	0.0249994	0.00371797	0.00849756	0.0225226	0.00455047	0.0129987	0	0.0254971	0.166843	0.00292064	0	0.0987226	0	0.144968	0.0189851	0.0129944	0.0196789	0.0388988	0.0517992	0.00434501	0.037821	0.0105653	8.03317e-19	0.00712137	5.99228e-18	0.0209222	0.000310262	0.00902138	0.058976	0.0594433	0.0396171	0.0470946	5.04023e-18
GSM914425	0	1.16096e-18	0.00509128	0.11724	0	7.73288e-18	2.46826e-18	0	1.17647e-18	0	0.00541118	0	0.0224518	0.0800877	0.0104159	0	0.0178042	0.00447418	0.00654272	0.0250872	0.0134958	0.00621128	0	0.0518723	0.163446	0	0	0.0848555	1.28429e-19	0.176976	0.0436163	0.0267414	0.027018	0.0314518	0.0434892	0.00541129	0.0219598	0.0016481	0.00161564	0.00271089	0	0.0522391	0.00187855	0.0148775	0.0527227	1.53431e-18	0.0497544	0.0141007	7.77968e-18
GSM914426	0	0	0.0183542	0.115353	0	3.01833e-18	0	4.06807e-20	6.85884e-18	1.58579e-18	0.0166141	0.00327306	0.0381424	0.0732895	0.0271081	0	0.0337411	0	0.00788506	0.0274452	0.00554633	0.0303014	2.1469e-18	0.0706768	0.186432	0.00325915	4.1885e-20	0.0777168	2.60953e-18	0.0889307	0.02947	0.0182614	0.0272629	0.0490065	0.0645203	0.00649144	0.0387682	0.000523835	0	0.0120945	0	0.0531385	0.00203257	0.0112515	0.0279911	3.85066e-18	0.0286979	0.0579586	0.00381173
GSM914427	1.27429e-18	0	0.0393275	0.12305	1.63077e-18	0	0	0.000531789	0.00994752	0.034248	0.0167564	0.0045039	0.0338007	0.0701867	0.00680472	0	0.0278429	0.00703849	0.00159221	0.00997073	0.00517412	0.010493	0	0.00434556	0.133102	0.00243257	0	0.0878457	3.04399e-19	0.163781	0.0142553	0.0151202	0.0155233	0.0373467	0.0319336	0.00502007	0.0469624	0.00203889	1.94874e-19	0.00987091	0	0.0241163	0.0023582	0.015794	0.0530294	0.00640196	0.0445339	0.0220325	0.00712648
GSM914428	3.55339e-21	1.28893e-17	1.85272e-18	0.131661	0	0	1.3453e-17	0	0	0.00425193	0.0140803	2.53435e-19	0.0436517	0.0815739	0.0455322	0	2.41169e-18	0.00491849	0.00771705	0.0206737	0.0112405	0.0194915	0	0.0669838	0.179599	0	2.46436e-19	0.0902676	0	0.158495	0.0307468	0.0236692	0.0139463	0.0473324	0.0641787	0.00465616	0	1.96936e-05	1.88952e-18	0.0148493	0	0.0459678	0.000428404	0.00556862	0.0365393	0	0.0226066	0.0688965	0
GSM914429	0	0	1.35373e-18	0.142564	0	5.20107e-18	5.37463e-18	5.36975e-20	3.55367e-18	0	0.0100121	4.75153e-20	0.0351317	0.0946003	0.0270699	2.09757e-18	0	7.63821e-05	0.00420699	0.0167126	0.00603401	0.0163173	0	0.0289519	0.186008	0.00145829	1.08035e-18	0.096428	0	0.183534	0.0256657	0.0210975	0.016293	0.0403156	0.0630127	0.00504782	0.00389507	0	1.02977e-19	0.00805243	0	0.0400251	0.000887696	0.00917599	0.0569558	0.0103658	0.0285249	0.0703147	0
GSM914430	1.87434e-19	1.57896e-18	0.0720045	0.116544	8.68481e-18	0.00959941	2.20022e-18	0.0105767	0.0162668	0.065987	0.053772	0.0386858	0.0405719	0.0641641	0.0114036	0	0.0197389	0.00402603	0	0.0157786	0.0107382	0.00264244	6.0858e-19	0.0223839	0.104675	0.00090555	3.91741e-19	0.110078	1.01041e-18	0.15815	0.0181086	0.0159434	0.0270902	0.0407336	0.00460751	0.00365978	0.0680193	0.0125264	1.6704e-18	0.00731853	7.46356e-18	1.08275e-19	0.00185388	0.00599488	0.0686373	0.0115327	0.0478417	3.31033e-18	2.15911e-19
GSM914431	0	0	0.0699969	0.175913	2.6024e-18	9.1069e-18	2.11934e-17	1.70619e-19	0	0.0180233	0.0519484	0.0323214	0.0259468	0.0507089	0.0219171	0	0.0343091	0	0.00196467	0.0234056	0.0173851	0.00164728	0	0.0370944	0.0999289	0.00168189	0	0.0734458	0.00432884	0.235231	0.0256295	0.0159786	0.024481	0.0278131	0.0283437	0.00501707	0.0667342	0	0	0	0	0.00279138	0.0019745	0.00944514	0.0721911	0.0207768	0.0359425	0.00661761	3.32082e-18
GSM914432	0	6.36524e-18	0.0524115	0.165627	1.02313e-17	0	2.24887e-18	0.0106467	0.00752937	0.0865509	0.061493	0.0506714	0.0487693	0.0587491	0	3.87545e-19	0.0322657	0.00879902	1.47414e-19	4.05112e-20	0.00130843	0.00625817	9.55305e-19	1.64229e-18	0.128816	0	8.8371e-19	0.10368	2.13719e-18	0.181211	0.00649231	0.0068038	0.0260757	0.0340276	0.00804663	0.00305377	0.0603322	0	0	0.0086973	0	0.000524117	0.00149348	0	0.0666387	0	0.0500984	3.40392e-18	4.02401e-18
GSM914433	0	6.64323e-19	0.0185644	0.179943	0	0	1.49086e-17	1.43132e-19	2.75493e-18	5.42101e-20	0.0103485	0.0099723	0.0320518	0.0569069	0.0499505	0	0.029368	0.000170171	0.0069616	0.0105637	0.00633168	0.0100454	0	0.0819511	0.142566	0.00227184	0	0.0908771	0.0180101	0.211382	0.0362625	0.0333739	0.0171756	0.0469615	0.0711935	0.00546384	0.0361946	0.00204922	4.92024e-18	0.00542116	0	0.0232816	1.7523e-19	0.00207306	0.0577633	0.03235	0.0580615	0.0530107	6.59776e-18
GSM914434	3.81206e-20	0	0.0291842	0.175406	0	0	8.0676e-18	0.0136687	0.00799641	0.0818717	0.0578179	0.0593217	0.0489769	0.0477381	0.00471029	0	0.0155152	0.00486767	0	0.00150139	0	0.0126165	5.05584e-18	0.00936487	0.0962333	1.37509e-19	4.36098e-20	0.113394	2.59322e-18	0.174067	0.00394505	0.00453998	0.0212816	0.0456284	0.0152117	0.00302474	0.0355588	0.00500671	9.90298e-18	0.0135879	5.05908e-18	0.0135379	0.00244777	0	0.0608451	2.3563e-18	0.0389412	2.03939e-19	0
GSM914435	9.54836e-20	7.63505e-19	0.025268	0.175347	1.14573e-18	0	9.57343e-18	0.00253409	0	0.0101897	0.016503	0.00215618	0.0348466	0.0582106	0.0187163	0	0.0249471	0.00257531	0	0.00383542	0.00899951	0.00733403	0	0.0499998	0.121086	0	0	0.0894939	0	0.13405	0.0405208	0.0291638	0.0239541	0.036698	0.015527	0.00482127	0.0377051	2.84395e-19	5.08304e-18	0.0048296	4.49439e-18	0.0385882	0.00108135	0.00819594	0.0699686	9.75755e-18	0.0633607	0	0
GSM914436	0	1.30818e-17	0	0.114732	0	0	1.03685e-17	0.00140441	2.40585e-19	0.0181439	0.0233744	0.0179837	0.0378902	0.0699626	0.021006	0	0.000826452	0.00274313	0.00841739	0.0193816	0.00386021	0.0128518	7.27245e-18	0.0358997	0.135977	0.00127238	0	0.101229	6.37455e-20	0.171	0.028462	0.0254881	0.0225353	0.047157	0.0389215	0.00495284	0.00680558	0.0130221	0	0.00841656	4.48578e-18	0.053295	0.00124819	0.00985516	0.066106	0.0396185	0.0255981	0.0227258	0
GSM914437	2.57318e-20	1.47947e-17	0.0295495	0.124228	0	3.36137e-18	1.09351e-17	1.36014e-19	3.41167e-19	0.0141691	0.00525139	3.9541e-19	0.0277083	0.0509358	0.00724019	0	0.0273473	0.00357366	0.00448267	0	0.00404327	0.00338182	0	0.0229499	0.150277	0.00215257	4.50856e-19	0.0954709	0.00105714	0.130694	0.0424192	0.0256224	0.0167881	0.0313897	0.0425819	0.00439974	0.0326397	2.53588e-18	1.20804e-19	0	1.40639e-17	0.0520683	0.000433844	0.0129444	0.093368	0.018955	0.053413	0.0299594	1.89444e-17
GSM914438	3.14867e-20	0	0	0.109483	0	2.13051e-19	1.3418e-17	3.10439e-20	0	0.00445702	0.00227191	0.00602144	0.0337566	0.0705207	0.00937633	1.05083e-17	0.00650513	0.0048248	0.00452089	0.00846117	0.00400001	0.00785395	0.0125684	0.039318	0.168181	0.00308602	0	0.104943	1.81477e-18	0.133275	0.0351977	0.0229282	0.027266	0.0410834	0.0436404	0.00420135	0.0187459	0.00706262	2.67137e-21	0.00645479	0	0.054696	0.00126799	0.0146241	0.0758776	0.0095242	0.0398022	0.0443095	2.39662e-17
GSM914439	4.66445e-19	2.82971e-18	0.00331761	0.146964	0	7.19802e-18	4.74217e-18	2.0069e-19	0	0.0272796	0.0215666	0.0239313	0.0283164	0.0604943	0.0153272	2.87892e-20	0.0212053	0.00426779	0.000280472	0.00612439	0.0101666	0.0123075	0.00156464	0	0.158194	0	1.46242e-20	0.103585	0	0.258254	0.0249195	0.0209023	0.0212988	0.0399728	0.0384493	0.00545889	0.0272441	0	6.14375e-18	0.0117889	1.28509e-18	0.0622425	0.00250929	0.00975826	0.0539217	0	0.0535192	0.0201101	0
GSM914440	0	3.81486e-18	0.0648656	0.104396	0	0	1.50662e-17	0.0071194	0.0159469	0.0706764	0.0417215	0.0390034	0.0463955	0.0564363	0.0153918	0	0.0156647	0.00862818	0	0.0150538	0.0123343	0.00838564	1.84286e-18	0.0336407	0.123005	5.58043e-20	0	0.109586	0.0047322	0.132197	0.00738649	0.0102617	0.0203819	0.0507085	0.0202349	0.00391492	0.0626532	0.0225407	0	0.0115629	1.00669e-17	8.03008e-22	0.00232878	0.00182457	0.0532122	4.85213e-18	0.0406627	0.00879813	5.91973e-19
GSM914441	0	1.21632e-17	0.0169244	0.101501	4.63313e-19	0	7.61242e-19	0.00559271	0	0.0217166	0.0215484	0.0144624	0.029278	0.0669089	0.0274397	0	0.0247059	0.00914567	0.00392053	0.017106	0.00641661	0.0128435	0	0.0627963	0.163126	0.00276282	6.83348e-19	0.112091	0	0.0927871	0.0281384	0.0190765	0.0201057	0.0439135	0.028554	0.00477854	0.0322123	4.95924e-19	0	0.00457609	0	0.0456875	0.00274304	0.0122508	0.0812838	0.0116158	0.0498542	0.00670764	0.00106765
GSM914442	8.61948e-20	0	0	0.0968722	0	0	0	2.04092e-19	0	0.00263853	0	0	0.029367	0.0986729	0.0134633	0	1.30407e-19	0.00901447	0.00336064	0.0237938	0.0144219	0.0198106	0.019174	0.0291893	0.210218	0.00434532	0	0.114847	0	0.103792	0.0260985	0.0235876	0.0196507	0.0443386	0.0647927	0.00490047	0.00354775	0.0198021	8.07198e-18	0.0185874	0	0.0829969	0	0.00241679	0.0509132	0.00515065	0.0441066	0.081389	0.00168951
GSM914443	6.77196e-19	0	0	0.0798157	0	0	0	0.0011174	2.46912e-18	0.0253112	0.0048673	0.0122243	0.0550256	0.0833428	0.00740528	3.48933e-18	0	0.0103661	0.00409258	0.00252773	0.00849323	0.0137658	1.74113e-18	0.0319373	0.186828	0	0	0.111284	0	0.202891	0.0363458	0.0272421	0.022022	0.0401346	0.046878	0.00388618	0.0167744	0.000413063	5.01543e-20	0.0196337	1.83024e-18	0.0745422	0.00227322	0.00817898	0.0642585	0	0.0310101	0.0376459	0
GSM914444	1.11151e-18	8.95923e-19	0	0.121365	1.93211e-18	0	3.16228e-19	0.00906586	0.00490655	0.0380578	0.0208784	0.00299216	0.0489167	0.0769869	0.00569033	0	0.0180852	0.00463884	0.000231653	0.00758935	0.00429481	0.0109843	7.67876e-19	0.0472238	0.183478	1.93533e-19	0	0.110885	0	0.189656	0.0195607	0.0117304	0.024108	0.0443732	0.035262	0.0038789	0.0237554	1.9089e-18	0	0.00752428	2.11471e-17	0.034828	0.00205768	0.00879828	0.0436969	0	0.057296	0.0273489	0.00315791
GSM914445	3.37552e-19	0	0.0124474	0.128841	1.87956e-18	0	0	0.0105131	0.00846069	0.0597169	0.0301924	0.0271771	0.0423936	0.0685588	0.00580165	0	0.00776104	0.00899631	0.000506462	0.00661119	0.0021048	0	0	0.0272554	0.0979072	0.00127468	4.41456e-19	0.0850281	0	0.136818	0.019985	0.012106	0.0231472	0.0383312	0.0321287	0.00365905	0.0269816	0.00382614	0	0.000176794	1.08943e-18	0.030682	0.0025041	0.0122091	0.0860048	0.00778445	0.0370316	0.0132829	9.03827e-18
GSM914446	0	2.95138e-18	0.0513117	0.0902337	0	1.2239e-18	8.54881e-20	0.0128551	0	0.0343334	0.0188305	0.00983037	0.0539672	0.12103	0.000168914	8.82848e-18	0.0443487	0.00697199	4.20585e-20	0.00980612	0.00638165	0.0147759	3.44909e-19	0.0352791	0.171316	1.82273e-18	0	0.134975	0	0.137177	0.0203316	0.0109603	0.0217063	0.0396032	0.0403368	0.00437733	0.0602941	1.52345e-18	0	0.0147878	0	0.0496424	0.00290553	0.0069884	0.0366601	8.72389e-18	0.0831446	0.0293806	0.0722858
GSM914447	0	2.17977e-18	0.00674918	0.158514	2.47054e-18	3.5781e-19	7.60654e-19	0.0177946	0.0172243	0.0534819	0.0498493	0.00240082	0.0466606	0.0754648	0.014961	4.57405e-19	3.94211e-18	0.00546662	0	0.00662212	0.00632028	0.00220091	1.06997e-18	0.0504061	0.104856	0	3.03299e-19	0.0959638	6.95398e-19	0.135626	0.0245447	0.0176222	0.0293015	0.0388835	0.0306002	0.00423365	0.0199872	0.00442937	0	0.00903997	0	0.0461687	0.00230927	0.00449458	0.0537554	7.59597e-18	0.0295785	0.0134213	2.88713e-18
GSM914448	1.51044e-19	3.5264e-18	0.0432072	0.132134	0	9.01884e-18	1.4185e-17	0.000979786	0	0	0.0131543	7.66319e-19	0.0348115	0.0635717	0.00668749	0	0.0190098	0.00184118	0	0.00414101	0.00804767	0.0116013	6.12227e-18	0.0333734	0.14421	0.00184858	6.70519e-20	0.08092	0	0.199164	0.0359191	0.0199513	0.0271963	0.0325459	0.0438404	0.00526871	0.0588523	7.18767e-19	1.44283e-20	0.0135534	6.4317e-18	0.0543883	0.00161365	0.0132345	0.0325994	0.0133799	0.0511688	0.0310174	9.66035e-18
GSM914449	0	2.23222e-18	0.0747392	0.116105	1.01299e-17	7.13401e-19	4.28773e-19	0.0138479	0.00378609	0.047965	0.0434026	0.0169475	0.0493588	0.0894115	0.00103611	6.58798e-18	0.0397938	0.0031385	0	0	0.00845493	0.000303059	3.51892e-18	0.0168742	0.0885227	3.73846e-19	0	0.0618731	0.00449628	0.128206	0.0166281	0.0081685	0.0217802	0.0290747	0.0241338	0.00307913	0.0694038	0	0.00271103	0.0119467	9.97524e-19	0.0272819	0.0029659	0.0151365	0.0525465	6.37719e-18	0.0497168	0.00235424	6.16011e-18
GSM914450	0	1.17265e-19	0.0464423	0.148108	9.26702e-18	2.29629e-18	1.45191e-17	0.00129077	3.07374e-18	0.0301897	0.0520651	0.0510944	0.0262198	0.0559998	0.0331124	2.62557e-18	0.011036	0.00225755	9.22912e-23	0.0409463	0.01041	0.012244	1.15071e-18	0.0828402	0.135772	0.00172778	4.20047e-19	0.0815207	0.00365572	0.187545	0.0081232	0.0136309	0.0192072	0.0617263	0.0290307	0.00430396	0.0530711	0	0	0.0078501	0	0.0194616	0.00297478	0	0.0547702	0.0112147	0.0401717	0.0220796	8.33937e-21
GSM914451	0	0	0.125671	0.116009	0	3.88868e-18	1.39113e-17	0.01636	0	0.0691851	0.0654151	0.0573006	0.0307391	0.0796084	0.00978612	0	0.0457101	0.00388437	4.89494e-20	0.0265594	0.00622757	0.00545907	3.55362e-19	0.043245	0.10429	0.0012726	0	0.0973753	2.32099e-18	0.119792	0.0161866	0.0136752	0.0238178	0.0470121	0.0123614	0.00357586	0.0919488	0.00686772	0	0.00807501	0	0.0181076	0.00354667	1.49592e-18	0.0818275	0.00444811	0.0621905	0	1.44149e-18
GSM914452	0	0	0.0300422	0.164022	2.86838e-18	0	1.8952e-17	0.00251587	0	0.0567147	0.0578068	0.0607437	0.038346	0.0441291	0.0178649	0	0.00430716	0.00474843	0	0.0322746	0.00769292	0.000306973	0	0.0548601	0.0873877	0.00112233	3.79663e-19	0.0988075	0	0.186441	0.0178043	0.0165873	0.0254394	0.041646	0.00372029	0.00398643	0.0350865	0	0	0.00608829	4.19851e-18	0.00977031	0.00330259	2.72741e-19	0.0771165	0.00283319	0.0498491	2.15308e-18	2.1263e-17
GSM914453	7.07208e-20	0	0.0281992	0.148589	0	9.82772e-19	1.42371e-17	0.0187007	0	0.0657292	0.0905958	0.0516824	0.0471092	0.0798382	0.00942277	0	0.0577752	0.000152198	6.77342e-19	0.00388141	0.00722528	0.0202267	0.0311822	0.0553384	0.13204	0	8.38489e-20	0.0965986	0	0.127732	0.0183076	0.01443	0.0248606	0.0446802	0.0156634	0.00559464	0.0364154	0	0	0.0299413	0	3.97223e-21	0.00320021	0.00604329	0.0431822	4.0661e-18	0.0528853	4.64415e-19	0.0037952
GSM914454	2.60165e-19	0	0.0356241	0.132747	0	0	1.41328e-17	0	0	0.031352	0.0219312	0.0364546	0.0501691	0.0598095	0.0358377	2.15906e-19	0.032199	0.0045786	0.000403225	0.0291759	0.00953547	0.02024	0	0.0720234	0.13315	0.00223142	0	0.132327	0	0.243098	0.0213229	0.0241961	0.0291184	0.0543605	0.0218301	0.00483715	0.0440253	0.00385674	4.95904e-19	0.0116495	2.27658e-17	0.043148	0.00377591	0.00359901	0.0615276	0.0306695	0.043216	0.000511072	2.89067e-18
GSM914455	1.23075e-19	0	0.0701581	0.106931	0	1.14899e-18	0	0	0	0.0392497	0.0324033	0.0296615	0.0390157	0.082331	0.0197014	0	0.0257713	0.00671426	0.000789526	0.0115602	0.00801987	0.0231717	6.48744e-19	0.0306854	0.198749	0.00318909	3.92042e-20	0.131139	4.67124e-18	0.255541	0.0139106	0.00998872	0.0270207	0.0476879	0.0408796	0.00597104	0.0807944	0.00162589	3.98946e-18	0.0186915	0	0.0511741	0.00155796	0.00752435	0.0243906	0	0.0492688	0.0365476	2.35893e-19
GSM914456	0.000239165	1.54117e-17	0	0.117738	2.21917e-17	0	0	0	6.30146e-18	1.72109e-17	0	3.33908e-18	0.0865229	0.0860896	0.0492666	0	0.0280088	0.0189506	0.0205609	0.0495944	0.0123269	0.0681618	0.0431666	0.0808864	0.336865	0	2.43177e-18	0.115427	0	0.317255	0.0138924	0.0149774	0.0217904	0.0558972	0.0315671	0.0165392	0	0	0	0.026951	0	0.12391	0.0115347	2.38232e-19	0	0	0.0269141	0.0245726	0.0701286
GSM914457	0	2.11315e-18	0.10858	0.15059	3.03232e-18	3.13487e-18	1.52549e-17	0.00943326	1.57336e-18	0.0693761	0.050658	0.0577884	0.0608289	0.0758004	0.0147078	0	0.0541187	0.00185837	0	0.00997933	0.00209086	0.0126814	0	0.051804	0.0672088	0.00347034	5.11743e-19	0.127176	1.34344e-18	0.233638	0.0129081	0.0150156	0.0273356	0.0446953	0.00459826	0.00503699	0.0857148	8.54248e-19	2.80294e-19	0.012615	3.16542e-18	0.0079557	0.00405893	0.000389411	0.0419758	0.00878859	0.0613055	5.41591e-19	0.0102254
GSM914458	0	2.46576e-19	0.00768775	0.188553	7.32848e-18	1.69823e-18	1.71277e-17	0	5.53411e-20	0	0.0226192	0.030193	0.0396279	0.0795557	0.0184989	0	0.0154949	0.00109426	0.0066748	0.00545431	0	0.0139342	0.0167997	0.0382424	0.163531	0.00373478	8.23373e-19	0.095249	0	0.205195	0.0366969	0.030351	0.0311339	0.0302586	0.0497265	0.00534052	0.0423259	0.013949	2.61378e-18	0.00638874	2.4143e-18	0.0501918	0.00137462	0.00948502	0.0711188	0.00318507	0.0323523	0.0344425	0
GSM914459	0	0	0.0206782	0.134435	1.13178e-18	0	8.05809e-18	0	0	0.0288526	0.0269771	0.0269636	0.0509533	0.0890262	0.0196336	0	0.0202749	0.00636302	0.000881039	0.0193322	0.0056957	0.0190977	6.40159e-18	0.0324997	0.19096	5.07276e-20	1.17824e-19	0.122698	0	0.299996	0.0303844	0.0223805	0.0301454	0.0290375	0.0193601	0.00446153	0.0440293	0.00567046	0	0.0111056	0	0.0306018	0.00102676	0.00431267	0.0577704	1.34112e-18	0.0392927	3.95838e-19	0
GSM914460	1.88311e-20	0	1.40243e-18	0.0523887	0	1.03452e-18	2.46878e-17	0	0	0.0162365	0.0315407	0.0110172	0.0624965	0.113999	0.00957288	0	0.00388338	0.0179279	0.00140084	0.0277864	0.01364	0.0292234	0.0166129	0.0269287	0.249921	0.00280646	2.53293e-20	0.12766	0	0.150696	0.0172375	0.00374478	0.0296483	0.0350341	0.0385982	0.00900555	0.00999536	0.0102099	8.13691e-19	0.026448	0	0.146688	0.0106128	0.00504174	0.0458223	0	0.0365155	0.0336697	0.012916
GSM914461	1.02223e-18	7.01612e-19	0.0212115	0.12484	0	4.27699e-18	0	0.00328141	0	0.0061773	0.0398945	0.0279717	0.0657512	0.123251	0.023991	0	0.0337952	0.00508086	2.34607e-23	0.0185231	0.00779949	0.0337199	0.00594193	0.0714455	0.189273	1.33207e-19	0	0.0810312	1.49685e-18	0.129657	0.0283606	0.0278311	0.0242034	0.0431219	0.0310782	0.00693975	0.0497018	2.81208e-19	6.42654e-18	0.0131086	0	0.0370288	0.00447113	0.0045364	0.0338755	0	0.0572023	0.0178705	6.2424e-19
GSM914462	0	2.32274e-18	0.11709	0.125838	0	0	0	0.0158652	0	0.0836082	0.0731744	0.0746143	0.0505119	0.0848347	0.000736982	1.00593e-17	0.0736181	0.00433207	0	0.0217498	0.00223732	0.00739976	1.69991e-17	0.0341075	0.0774224	0	5.19177e-19	0.116283	4.13967e-18	0.196568	0.00537143	0.00213408	0.0215554	0.0396658	0.00760233	0.00276064	0.0865657	1.41811e-19	0	0.0146538	5.51675e-20	0.0126121	0.00201421	0	0.0562933	1.35395e-17	0.0749526	2.86824e-18	3.1013e-19
GSM914463	0	5.01362e-18	0.086875	0.184692	3.84166e-18	0	1.42194e-17	0.0101618	0	0.0417213	0.069899	0.0495838	0.0452889	0.0815061	0.0360432	2.07721e-17	0.0583219	0.00031674	1.05082e-20	0.00330564	0.00321268	0.0298048	0	0.0720144	0.0962487	0	8.71454e-20	0.120738	0.00337807	0.193925	0.00876132	0.0187573	0.019345	0.0465513	0.0165669	0.0037459	0.0816232	0	3.28114e-18	0.0200601	1.66235e-18	0.00126059	0.00461552	6.25844e-20	0.0539182	1.58722e-17	0.0865046	0	0.00164397
GSM914464	2.27325e-19	2.38896e-18	0.0164291	0.211599	0	1.02488e-17	4.47652e-18	0.0179131	3.6577e-19	0.0568746	0.0608441	0.0560274	0.0540898	0.0767375	0.0225015	0	0.00811685	0.00382296	2.3345e-20	0.00260889	0.000408399	0.0217227	0	0.0540273	0.124898	1.28664e-18	1.5921e-19	0.100346	0.0017341	0.173546	0.0141652	0.00915775	0.0163243	0.0466854	0.0353495	0.0031767	0.0299868	0	7.87602e-18	0.0138842	1.06985e-17	0	0.00332508	0	0.0419406	0	0.062997	0.0182106	2.86763e-18
GSM914465	9.35455e-19	0	0.0659078	0.114605	0	8.96778e-19	2.51024e-18	0.00403392	0	0.0303431	0.034934	0.0461879	0.0466698	0.0724953	0.00920258	0	0.0527939	0	2.01732e-19	3.73474e-19	0.00336978	0.0152979	5.13451e-18	0.0528462	0.128357	0	0	0.101307	6.91927e-18	0.191432	0.0218139	0.0305594	0.0221279	0.0404029	0.01836	0.00440317	0.0715225	0	1.80051e-18	0.00307846	1.75345e-17	0.0731483	0.0029978	0.008789	0.0571016	7.40097e-18	0.0454052	2.68458e-18	2.21271e-17
GSM914466	6.74844e-20	1.06333e-17	0.00491149	0.0968248	0	7.26957e-18	9.64001e-18	0.00330835	1.24577e-19	0.0147474	0.0248576	0.00626556	0.0567466	0.111465	0.0123949	0	0.0188466	0.00685939	0.00205517	0.0216548	0.00814965	0.0393183	0	0.0476119	0.23	0	0	0.103567	4.99442e-18	0.104963	0.0286567	0.0193804	0.0239285	0.0459168	0.0457648	0.00474815	0.0355792	0.00328108	3.01951e-19	0.0345431	0	0.0666687	0.00306383	0.00607095	0.0316711	0	0.0388883	0.0358449	1.08025e-17
GSM914467	0	0	0.0037418	0.194497	0	0	1.70978e-17	2.06712e-18	0	0.0138681	0.027509	0.0476114	0.0189828	0.0562015	0.016552	0	0	0.00186206	0.0061856	0.015878	0.00630918	0.00606383	0	0.00495216	0.103564	0.00127037	1.55257e-19	0.0929038	9.99529e-19	0.20478	0.0261534	0.0219565	0.0194376	0.0380003	0.0293682	0.00428034	0.0230655	0.00764998	0	0.00443022	0	0.0524852	0.00168621	0.00399518	0.103779	0.0401297	0.0274141	0.00437233	2.79917e-18
GSM914468	0	0	0.124639	0.120048	6.31676e-18	0	1.56372e-17	0.0093557	0	0.0274709	0.0524694	0.0448526	0.0320766	0.112529	0.00345979	2.4104e-17	0.0716109	0.000582378	0.000474415	0.0111757	0.00359937	0.0145552	1.17403e-17	0.0524255	0.183956	0.00166701	3.0925e-20	0.103807	0	0.160879	0.0121716	0.00644733	0.0211696	0.0496708	0.0476633	0.00361707	0.103474	0.009618	0	0.0185549	0	0.0164769	0.00286213	6.02017e-05	0.0512035	0.00429972	0.0576438	0.0178026	0
GSM914469	0	0	0.0685333	0.187331	0	2.11264e-18	1.6431e-17	7.34987e-20	2.61749e-18	0.0105252	0.0256793	0.0472818	0.024086	0.0412278	0.0331039	1.91889e-18	0.0291026	0.000857456	0	0	0.00193903	0.00325475	1.46518e-17	0.0546996	0.075143	5.0736e-20	5.02285e-19	0.0802272	0.00978582	0.218429	0.0314747	0.0478006	0.0158444	0.0400473	0.0181665	0.00429193	0.0716458	0	0	0.00320545	2.72507e-17	0.00326966	0.00204288	2.54824e-19	0.0918978	0	0.0428163	3.64572e-19	1.78097e-18
GSM914470	7.88112e-19	0	0.0965809	0.141857	4.12333e-18	0	1.50603e-17	0	0	0.0192266	0.0351135	0.0376635	0.0273638	0.0258269	0.0127278	2.56301e-17	0.042428	1.0985e-19	0.000134055	0.0111331	0.0094883	0.0020085	1.01001e-17	0.0564332	0.113	0.000613518	0	0.0793546	2.69911e-18	0.134422	0.0280991	0.0268585	0.0207804	0.0398274	0.0344208	0.00467066	0.0856339	0	3.07591e-20	0.00359388	0	0.0355342	0.00339241	0.00854924	0.102831	1.55425e-18	0.0497374	0.00207603	0
GSM914471	0	0	0.0104873	0.127901	6.06783e-19	0	2.40267e-17	0.00826812	0	5.86493e-19	0.0310239	0.0179348	0.0567897	0.0727239	0.000685042	0	0.0410573	0	0.00164097	0.000283455	0.00331065	0.0345615	0	0.0722218	0.161156	7.01944e-19	0	0.0859017	6.50424e-18	0.155929	0.0238794	0.0159448	0.019829	0.0457163	0.0397038	0.00400609	0.0294887	0	0	0.0110139	0	0.0591755	0.00575621	0.0149758	0.00548389	0	0.0607442	0.00460072	0
GSM914472	0	0	0.00785601	0.0931044	0	2.93135e-18	1.20939e-17	0.00209145	2.40951e-18	0.0335723	0.0372405	0.0212178	0.0514238	0.0956535	0.0411677	1.42339e-17	0.013747	0.0107956	0	0.0814675	0.00399357	0.0428719	0	0.0699274	0.21508	0.000448485	0	0.104479	0	0.117397	0.00729421	0.0021474	0.0229945	0.0706421	0.0407863	0.00383265	0.0302114	0.00503161	1.16005e-17	0.0231213	0	0.0101527	0.00597985	0	0.0582887	2.98937e-19	0.0304439	0.0448526	2.72908e-18
GSM914473	7.28019e-19	2.05557e-18	0.0182558	0.212642	0	2.20727e-18	0	0	7.788e-19	0.023351	0.0312919	0.0249808	0.0296119	0.0527289	0.0318395	0	0.00499181	0.00222593	0	0.00765553	0.00091197	0.0135377	6.24661e-18	0.0431617	0.140623	0.0011585	0	0.109258	0	0.19786	0.02118	0.0324743	0.0160732	0.0476828	0.0417236	0.00357338	0.0436885	0.0190837	2.55153e-18	0.00983296	0	0.0219256	0.00346736	0	0.0777864	0.0133158	0.0420189	0.0358014	5.90498e-18
GSM914474	6.4415e-19	2.98001e-18	0.147428	0.106267	0	0	1.05985e-17	0.0100893	0	0.00925868	0.0264256	0	0.0604367	0.120646	0.0051618	1.70772e-17	0.0876464	0.00702193	1.21747e-20	8.26875e-20	0.00557522	0.0320954	6.30065e-18	0.0405143	0.191326	0	0	0.127319	0	0.209136	0.0199327	0.0209991	0.019151	0.0488162	0.0408444	0.00482426	0.12723	0	4.03495e-19	0.0161655	1.7405e-17	0.0479335	0.00475706	0.000776901	0.0420522	3.43821e-17	0.0864379	0.0193919	2.03108e-18
GSM914475	0	0	0	0.157773	0	0	1.45306e-17	0.010351	2.53087e-18	0.0314718	0.0500553	0.0381084	0.0474913	0.0979707	0.0284638	0	0.0115898	0.00536902	0	0.030174	0	0.0284962	3.9979e-17	0.0874151	0.13249	3.96068e-19	2.03994e-19	0.110061	1.87723e-18	0.191928	0.0202574	0.0165104	0.0224197	0.0579536	0.0190356	0.00429655	0.0040929	2.01867e-18	3.46503e-18	0.0162461	0	0.0334878	0.00202494	0.0023965	0.037646	1.06852e-17	0.0412249	3.44714e-19	0
GSM914476	0	2.26284e-18	0.075392	0.213356	0	1.99093e-18	0	0	4.9314e-19	0	0	0.0122887	0.0544615	0.0266053	0.0469579	1.42172e-17	0.0522521	0.00396385	0.00463301	0.0171039	0.0263198	0.00698717	0	0.0387093	0.0763695	0.00362334	0	0.103921	0.0186938	0.296808	0.0143616	0.0384864	0.0299164	0.0520786	0.0330155	0.00354107	0.0830746	0	0	0.0312549	2.2052e-17	0.04557	0.00633929	3.47266e-05	0.0193227	0.0460195	0.051278	0	0
GSM914477	0	0	6.64122e-19	0.063828	0	3.85302e-18	0	0	0	8.32381e-20	1.97049e-18	0	0.0463063	0.114721	0.0201305	0	5.84963e-20	4.90163e-20	0.0183482	0.0051414	0.0105207	0.0300556	0	0.039749	0.269712	0	0	0.0485422	8.26204e-18	0.326241	0.0448626	0.0141915	0.0309506	0.0289566	0.0959435	0.00767049	0	1.91916e-17	0.00925337	0.00788385	3.19204e-17	0.0918425	0.00483163	0.0221709	1.68868e-18	1.68851e-17	0.030942	0.075569	8.22074e-19
GSM914478	0	0	0.0231701	0.145305	0	0	9.1387e-18	0.00361629	0	0.0170433	0.0107735	0.00478487	0.0641505	0.0773854	0.0163218	0	0.0134285	0.00434162	0.00654365	0.0213488	0.00142087	0.0115383	2.45618e-18	0.0633258	0.198063	0	0	0.0841949	0	0.11757	0.0304381	0.0095744	0.0297185	0.0388546	0.0423229	0.00394036	0.0397799	0	0	0.00638182	0	0.0333082	0.00304877	0.00631903	0.0737946	1.68101e-18	0.0456033	0.0230977	1.26366e-17
GSM914479	0	0	0.0699001	0.149743	0	1.68279e-18	1.26225e-17	0.00532199	0	0.0555503	0.0507835	0.0552727	0.0392228	0.0470796	0.00116481	0	0.0393037	0.00146554	0	0	0.000524399	0.0189213	0	0.0114755	0.148529	0.00157458	0	0.115245	0	0.147305	0.0228174	0.0229143	0.025449	0.0376525	0.0290711	0.0040605	0.0646616	0.00550636	6.4154e-18	0.0124424	7.42749e-18	0.049632	0.00308753	1.69746e-19	0.06827	0	0.0506879	0.000936006	3.98877e-18
GSM914480	0	0	0.0618524	0.131581	7.35408e-18	0	1.5287e-17	0	8.7801e-19	0.0392191	0.0359017	0.0266339	0.0467246	0.0540202	0.0140949	0	0.0290949	0.00370737	0.00216193	0.0335639	0.0128336	0.0123598	0	0.0431234	0.157301	0.000703385	0	0.110098	0	0.191753	0.0250319	0.0207949	0.0237905	0.0473279	0.0342223	0.00423499	0.0625883	0.00339789	0	0.0118315	0	0.0764176	0.00378775	0.00265229	0.0572276	0.0155054	0.0463718	0.00970126	3.90913e-18
GSM914481	7.1958e-19	0	0.0559375	0.122693	2.74096e-19	6.07188e-18	1.64692e-17	0	0	0.00881531	0.0337985	0.0222645	0.0456387	0.0885694	0.035778	0	0.051474	0.000506769	0.00595659	0.0319201	0.0134044	0.0151546	0	0.0563569	0.196091	0.000716013	0	0.0990319	0	0.19504	0.0328451	0.021318	0.0250513	0.0492104	0.0315664	0.00508133	0.0602347	4.37832e-19	0	0.00292838	0	0.0582438	0.00397747	0.00300257	0.0902301	0	0.0526029	0.00443347	1.75273e-17
GSM914482	2.3703e-18	1.35605e-19	0.100554	0.196508	1.98858e-18	0	2.42439e-17	0	2.01168e-18	1.8516e-18	0.0180734	0.0252469	0.0431486	0.045154	0.0490723	0	0.0664673	0	0.0033958	0.0145814	0.0081746	0.0145075	0	0.0814714	0.143478	0.00261548	1.08959e-18	0.104409	0.00653475	0.254511	0.0287906	0.022972	0.0297575	0.0540792	0.0264699	0.00560783	0.0814382	4.1756e-19	5.4361e-18	0.00536743	7.29344e-18	0.054839	0.00340177	0.0113567	0.0678696	0.0217817	0.0686438	1.78542e-18	0
GSM914483	0	6.27694e-18	0.0370725	0.103245	0	9.38434e-19	1.15119e-17	1.94235e-19	1.27264e-18	0.0339404	0.0367806	0.0374433	0.0592603	0.0844484	0.0124148	2.39455e-17	0.0607943	0.00775947	8.94737e-20	0.00248921	0.00653549	0.0424557	0	0.0349003	0.177247	0.00290406	0	0.0715581	0	0.0909442	0.0218632	0.0213576	0.0241527	0.0410432	0.0136716	0.00603468	0.04333	0.00910777	2.97276e-18	0.0296542	1.40364e-17	0.0747045	0.00671646	0.00804646	0.0539066	0.02045	0.0527732	0	0
GSM914484	0	4.28487e-18	0	0.0956948	4.79179e-20	0	0	0	0	0	0.00829798	0.00106127	0.06052	0.118303	0.00182114	0	0.0241389	0.00464743	0.00800781	0.014865	0.0155116	0.0230969	4.09137e-19	0.0175385	0.212181	0	1.48629e-19	0.0918352	2.91107e-18	0.230564	0.0308489	0.00713382	0.0295509	0.0329802	0.0569035	0.00732423	0.0195946	1.79673e-18	1.97006e-19	0.0139197	2.22807e-19	0.0653562	0.00546542	0.0138128	0.0436711	1.37818e-17	0.0501533	0.0297669	0
GSM914485	0	4.89307e-18	0.0321839	0.112263	0	0	1.04496e-17	0	0	5.00108e-19	0	3.50169e-18	0.0460921	0.0591529	0.00629051	0	0.0449553	0	0.0212731	7.29386e-19	0.0112916	0.0152574	0	0.00457661	0.213404	0	8.59321e-19	0.0665408	0	0.14683	0.024258	0.00621305	0.0212092	0.0362065	0.0949535	0.00658803	0.0397322	2.33942e-19	0.000604689	0.0063632	0	0.0621241	0.00667658	0.0244834	0.0567959	0	0.0538228	0.0804605	1.30247e-18
GSM914486	0	3.29621e-18	2.92388e-18	0.121475	1.00503e-17	0	2.54727e-17	0	0	7.60688e-18	1.04459e-18	0	0.0388619	0.057057	0.0294533	0	0	0	0.0100942	0.0332872	0.0232561	0.0148158	0	0.105953	0.195531	0.00428737	0	0.0736383	2.57535e-18	0.131106	0.0361793	0.0149129	0.023231	0.0425035	0.0523538	0.00664528	0	5.76499e-18	0.00286536	0.00651245	8.66155e-18	0.0820089	0.00241408	0.0241439	0.0672215	0.0556426	0.0362401	0.00721241	1.86057e-18
GSM914487	3.80334e-19	9.26327e-18	0.0169042	0.168777	0	1.29156e-17	9.17433e-18	0	0	0	9.92141e-19	0	0.035448	0.0420677	0.041784	4.18562e-19	0.0172306	6.44823e-21	0.0219956	0.0270283	0.0153009	0.0190842	0	0.106809	0.1865	0.00106381	0	0.0576236	0.0153134	0.206397	0.0555304	0.039873	0.0254805	0.0355446	0.0671802	0.00433368	0.0499407	0	0.00156273	0.0122849	8.45672e-17	0.0388623	0.00406018	0.0231423	0.0315006	0.00340994	0.038211	0.0156298	0
GSM914488	2.91766e-19	0	0.00767343	0.150966	3.17501e-18	1.41146e-18	2.19768e-17	2.16872e-21	1.30571e-18	0.0136534	0.0206642	0.0289247	0.053239	0.0529741	0.0351436	0	0.0193781	0.00323461	0	0.033724	0.00494244	0.0137908	6.49495e-19	0.0912303	0.124064	0.000761629	0	0.0967589	9.3586e-19	0.168063	0.0353865	0.0208069	0.025776	0.0504258	0.0260784	0.00435224	0.0209819	0	1.34186e-20	0.00671206	0	0.0145548	0.00576268	0.00752725	0.055456	0	0.0541628	0.0122462	6.39595e-18
GSM914489	1.0383e-18	0	0.00594893	0.0995043	0	0	9.27369e-18	0.00883113	0	0.029524	0.0258147	0	0.0476729	0.08093	0.0104312	3.84041e-18	0.0124773	0.00404109	0.001766	0.0530115	0.0112172	0.0247399	0.014389	0.050655	0.162546	0.00260546	1.91569e-19	0.0982952	0	0.119546	0.0113051	0.0110842	0.019069	0.0525419	0.0457408	0.00568115	0.0296248	1.25863e-19	6.01144e-20	0.0201036	7.23315e-18	0.0248359	0.00275517	0.00398718	0.0409233	0.0150235	0.029324	0.0444696	6.41832e-19
GSM914490	1.62693e-19	2.41208e-18	0.0590567	0.191114	1.05335e-17	0	6.79712e-18	0.0155141	0	0.0273731	0.0456021	0.0143304	0.049517	0.0577985	0.0135025	7.89868e-18	0.0441825	0.0023461	3.023e-19	0.00115036	0	0.0262308	0.00295129	0.0490025	0.123904	2.01905e-19	2.29382e-19	0.09324	5.66072e-19	0.103817	0.0256309	0.0219541	0.0270262	0.045664	0.025115	0.00570609	0.0711395	1.43368e-18	0	0.0146796	6.02023e-18	0.0131441	0.00439205	0.00326414	0.0281413	0	0.0522242	0.00895673	2.94191e-19
GSM914491	0	0	0.12446	0.099691	2.30807e-18	7.15362e-18	1.08488e-17	0.0179394	9.81363e-20	0.0327664	0.0596759	0.0511829	0.0468079	0.0504813	0.00759348	5.89386e-18	0.0891426	0.00113514	0	0.000528225	0.000445129	0.0125441	0.00884757	0.035944	0.0889643	0.000242259	0	0.0960163	6.07929e-18	0.180906	0.0269405	0.0261735	0.0262743	0.0408501	0.0124553	0.00631544	0.103056	0.00696517	0	0.010236	6.48176e-18	0.00814407	0.00212818	0.00762382	0.0640292	2.0572e-18	0.0459534	0	0
GSM914492	3.48338e-19	0	0.110771	0.163714	8.23803e-18	0	1.4399e-17	0.0225129	0	0.0496338	0.0785834	0.0508594	0.0276607	0.0401102	0.0127295	8.06132e-18	0.0729839	0.00371193	6.66166e-20	0.0229475	0.00281053	0.0123998	0	0.0497329	0.0713216	0.000731441	1.18491e-18	0.0943147	0	0.150288	0.0172056	0.012602	0.0244352	0.0477884	0.0131043	0.00443603	0.0962857	0.00459816	0	0.0107855	5.97256e-18	0.0131822	0.00267024	0	0.061774	0	0.0571667	0	0.00585101
GSM914493	2.85773e-19	2.35571e-18	0.0673891	0.187014	3.78533e-18	4.12628e-18	7.81783e-18	0.0162889	3.34375e-18	0.0272946	0.052191	0.0273049	0.0379468	0.0653766	0.0194106	0	0.032911	0.0033828	0	0.0142062	0.00533939	0.00801819	0.0158995	0.0912732	0.0925193	0	3.7146e-19	0.0918851	7.58768e-19	0.0864969	0.0361598	0.0265504	0.0244219	0.0431129	0.021023	0.00408104	0.0680625	3.67738e-18	0	0.0156983	6.68747e-18	0.0359468	0.00260454	0	0.0675981	1.02434e-18	0.0420536	0	0
GSM914494	0	2.3719e-18	0.0186243	0.10199	0	7.68514e-18	2.91642e-20	0.0126629	0	0.0091404	0.0478134	0.0186267	0.0384027	0.0640801	0.0320066	7.50823e-19	0.0155597	0.00412087	0.00804166	0.0523888	0.00993864	0.0220108	6.31974e-19	0.0942974	0.167538	7.00722e-20	0	0.0935064	0	0.157449	0.016282	0.0171113	0.0200119	0.0578425	0.0386232	0.00533685	0.0428709	0	8.75861e-20	0.0210938	0	0.0487229	0.00292447	0	0.0179121	0	0.0283715	0.0101509	7.74317e-18
GSM914495	2.50645e-19	6.40206e-18	0.0189987	0.212306	8.57927e-18	2.14888e-18	0	0	0	0	0.0180833	0.0166532	0.0396654	0.077068	0.0176165	3.48949e-18	0.0419126	0	6.239e-22	0.00300898	0.00894082	0.035687	1.46161e-17	0.0622134	0.166385	0	0	0.0927188	3.35703e-18	0.189794	0.024399	0.0193997	0.0228795	0.0404203	0.0510853	0.00529347	0.0469635	1.96943e-18	5.85521e-18	0.0207168	9.22436e-18	0.00136411	0.00170598	0.00763385	0.0238801	2.59872e-17	0.0545738	0.0098772	1.31412e-17
GSM914496	6.75522e-20	1.33179e-17	0.0779996	0.098161	0	3.10187e-18	0	0	8.89927e-19	1.07935e-17	6.2606e-19	9.00112e-19	0.024149	0.0712368	0.0114831	0	0.0751069	0	0.0164608	0.0314999	0.0142896	0.00734492	0.0504487	0.053679	0.17434	0.00563878	1.25308e-19	0.0792823	5.38285e-19	0.150675	0.0292676	0.0263891	0.0209006	0.0390075	0.0890173	0.00640346	0.0647617	1.03936e-20	0	0.000453415	2.70806e-17	0.0314425	0.000460623	0.0196391	0.0751478	0.0869097	0.0567391	0.0608713	4.03926e-18
GSM914497	1.88269e-19	2.53429e-18	0.00834857	0.160838	0	1.21747e-19	1.23409e-17	0.00342586	0	0.0177343	0.0396463	0.0250481	0.0482058	0.0654389	0.0265957	2.55595e-18	0.0267101	0.00467581	0.00439374	0.0275601	0.00613747	0.0196757	0.00632416	0.0690393	0.125769	0.00233013	1.4897e-19	0.116505	0	0.188636	0.0203088	0.022232	0.0263093	0.0528682	0.0465907	0.00510519	0.0239552	0.00727761	8.21275e-19	0.0175264	3.0161e-17	0.0132454	0.00236499	0.00281912	0.0529505	0.0204044	0.0428034	0.0259678	0
GSM914498	1.32802e-18	0	0.0627825	0.19161	4.03823e-18	0	5.29355e-18	0	0	0.0260649	0.048702	0.044077	0.0429559	0.0519827	0.0304583	1.75068e-18	0.0406846	1.93718e-20	2.63238e-20	0.000213959	0.00406939	0.00671205	0	0.0759718	0.0776641	9.04288e-19	0	0.0836379	1.83737e-18	0.26965	0.030472	0.0304687	0.020403	0.0382186	0.0203633	0.00458829	0.0574936	0	0	0.00805936	2.59067e-18	0.0196992	0.0023131	0.0053364	0.0738094	4.31979e-18	0.0647684	1.71813e-18	2.31961e-17
GSM914499	1.6241e-18	1.55585e-18	0.0405852	0.147794	8.77631e-18	0	6.24195e-18	0.00275698	0	0	0.0154734	0.0193202	0.0392681	0.0442333	0.0293999	1.46494e-17	0.0404244	6.83775e-20	0.00442017	0.018736	0.0140766	0.00984829	4.14751e-18	0.0931173	0.146017	0	5.05847e-19	0.0507936	0	0.190243	0.0331743	0.0210903	0.0241554	0.0424189	0.0396904	0.00480989	0.0441022	0	9.6764e-20	0.00341482	0	0.0241127	0.00251316	0.00873838	0.060042	1.48225e-17	0.047519	0.0158379	0
GSM914500	0	0	0.0684977	0.148905	3.47922e-18	0	1.56612e-17	0.00897115	6.18441e-18	0.0638347	0.0680199	0.0666136	0.0334146	0.0568039	0.00070782	0	0.0457912	0	1.47161e-20	0	0.00427257	0.00288789	4.91607e-19	0.0282765	0.0413358	1.70718e-19	0	0.0942015	0	0.167797	0.014369	0.0176519	0.015929	0.0310901	0.00372541	0.00368376	0.0623143	0	0	0.00719556	0	0.0340413	0.00247023	0.00257971	0.0687115	2.25729e-17	0.0606065	0	0
GSM914501	2.35893e-19	0	0.0151095	0.114261	2.3535e-19	5.78427e-18	1.624e-17	0	0	0.0103118	0.0274545	0.0170768	0.0251619	0.055002	0.010225	0	0.0255803	1.30015e-19	0.00862387	0.00247367	0.00919423	0.016827	0.0312835	0.0180052	0.161938	0.00410151	9.80008e-20	0.0880038	0	0.176045	0.0244739	0.0331681	0.0221529	0.0413752	0.0620896	0.0071169	0.0369672	0.00355454	0	0.0137275	0	0.0349592	0.00233949	0.00764929	0.0338951	0.0216412	0.025102	0.0754994	0.00301807
GSM914502	2.52441e-20	0	0.013832	0.113189	5.60981e-18	1.17761e-17	5.80564e-18	0.00525258	1.05775e-18	0.00423213	0.0352308	0.0223729	0.0381904	0.07389	0.0391831	7.87567e-18	0.0196832	0.0070953	0	0.0391776	0.0084292	0.0289509	0.0133915	0.072498	0.153953	0	1.7446e-19	0.0938183	0.0103164	0.193299	0.0217744	0.0200448	0.0225208	0.0452298	0.0346764	0.00680878	0.0381289	0	0	0.0127933	2.25151e-17	0.0393947	0.00600492	0.00759296	0.0358153	0	0.0306776	0.0164437	2.62786e-19
GSM914503	0	2.63475e-18	0.00793027	0.159715	2.63665e-18	5.29733e-18	1.43655e-17	0.00325957	1.0996e-18	0.0414558	0.0435146	0.0279556	0.0479821	0.0821377	0.0125254	0	0.00988575	0.00514852	0	0.0233504	0.00683467	0.00610862	0.0227299	0.0341255	0.114039	0	0	0.100637	0.000687594	0.120698	0.014505	0.0128099	0.0228584	0.047071	0.0253472	0.00476067	0.0282547	0.0116922	0	0.0157342	0	0.0248593	0.00129481	0.00652138	0.0531824	0	0.0492708	0.0102109	7.22093e-19
GSM914504	1.79437e-19	0	0.143425	0.0744597	0	0	1.34326e-17	0.0271336	9.47908e-18	0.0396149	0.0570754	0.0604839	0.0488558	0.0540981	1.5695e-19	0	0.103449	1.61835e-20	0	2.09954e-18	0.006107	0.00499842	0	0.0272154	0.0847451	0	3.96346e-19	0.0708679	0	0.0477215	0.0108345	0.0118399	0.0197969	0.0240952	0.00891838	0.00393923	0.0975648	0	0	0.00367321	0	0.057614	0.00224686	0.00810518	0.059547	0	0.0689563	0	0.0141074
GSM914505	1.92996e-19	2.76324e-18	0.00601568	0.167746	1.16034e-18	6.61987e-19	1.82476e-17	1.29608e-19	8.05677e-18	1.69377e-18	0.016037	0	0.0362331	0.0361626	0.0363673	0	0.038965	0.00191614	0.00454307	0.0220624	0.0190355	0.0166738	2.42477e-18	0.070846	0.163015	0.00338418	0	0.063196	0.00232171	0.15498	0.0396105	0.0305315	0.0269351	0.0407701	0.0468001	0.00697388	0.0301655	0	0	0.00843686	1.67343e-17	0.039125	0.00186104	0.0149752	0.0542893	0	0.0397276	0.0340116	8.6843e-21
GSM914506	0	1.53377e-17	1.35393e-18	0.0814998	1.61507e-17	0	0	0	0	7.37413e-18	0	3.24461e-18	0.0176511	0.0500512	0.0448078	7.79996e-18	0.014762	0.00106107	0.0239483	0.0383892	0.030958	0.0208231	0.0550902	0.0284296	0.207067	0.00601131	0.000367682	0.0695611	3.67487e-19	0.21056	0.0167333	0.0213928	0.0205334	0.032386	0.100209	0.00603404	1.69291e-18	0.0045671	1.72524e-19	0.0157854	0	0.10742	0.00545939	0.0230999	0.0130204	0.0848749	0.0262008	0.111354	1.54371e-17
GSM914507	3.12323e-19	1.13224e-17	0	0.14527	0	1.41377e-17	6.00754e-18	0.00179416	0	0.00132001	0.0218506	0.0214787	0.026075	0.0523032	0.0132192	0	0.0200436	0.001483	0	0	0.00611944	0.00644156	0.01495	0.0324113	0.095269	0.00380291	8.17484e-19	0.0717782	0	0.110512	0.0349721	0.0283756	0.0271959	0.0329684	0.0170936	0.00586015	0.00461397	0	0.00257606	0.0047782	0	0.0406574	0.00178097	0.0179166	0.080536	0.0551211	0.0358081	2.20687e-20	0
GSM914508	0	0	4.94889e-19	0.0632927	1.67395e-18	0	0	1.3674e-19	8.97145e-18	0	0.00655272	3.68037e-19	0.0331344	0.102401	0.00401949	3.84656e-18	0.0137941	0.0087928	0.00769282	0.0307962	0.00700554	0.0303725	0.0451064	0.03213	0.279944	0.00538149	0	0.102191	0	0.176243	0.0191199	0.0169511	0.0255846	0.0358669	0.058585	0.0103079	2.38215e-18	0.00902298	6.58849e-19	0.0123794	0	0.115163	0.00370751	0.0188446	0.0330487	0	0.02709	0.0579182	0
GSM914509	1.07836e-19	9.50035e-19	0.00347974	0.127855	5.85838e-18	1.03562e-18	9.52792e-18	0.0159573	2.39727e-18	0.0466897	0.0564055	0.0434147	0.0384356	0.072923	0.0132073	0	0.0117743	0.00612446	0.000936737	0.0129384	0.00402787	0.0106563	0	0.0606096	0.124302	2.49389e-19	0	0.0871388	0	0.225934	0.0269811	0.0243648	0.0236416	0.0410663	0.0270744	0.00538296	0.0220535	0	0	0.0122403	0	0.038044	0.00321867	0.00813199	0.0387548	1.16772e-17	0.0401307	0.00875949	0
GSM914510	0	2.94344e-18	0.0794417	0.0946063	0	1.16805e-17	3.28024e-17	8.14562e-20	0	0	0.0109959	0.0135163	0.0397094	0.0443738	0.00495218	0	0.0680526	0	0.00250992	0	0.00551968	0.0140437	9.92176e-18	0.0423729	0.214654	0	0	0.0801259	4.45019e-18	0.160265	0.0312378	0.00866803	0.0277579	0.0307407	0.0539604	0.00465525	0.0719983	3.741e-18	1.31452e-19	0.00547523	4.86159e-18	0.0406326	0.00266412	0.016236	0.0629919	0	0.0733612	0.0325021	1.90298e-18
GSM914511	0	2.01351e-18	0.0126128	0.0721616	0	0	0	1.42004e-18	2.11612e-19	3.20306e-19	0.0011363	4.08323e-19	0.0215367	0.0506256	0.0243131	0	0.0220577	0.0119138	0.00101121	0.0807141	0.00553982	0.0150098	0.0336697	0.0454371	0.157676	0.00343527	0	0.101778	0	0.180105	0.0199038	0.0258417	0.018588	0.0552368	0.0510472	0.00639919	0.0288941	0.00215756	6.0929e-19	0.0168645	1.29453e-17	0.0479635	0.00159231	0	0.0510716	0.0827155	0.0322215	0.0476451	0.00164612
GSM914512	0	3.0694e-18	0.159394	0.128892	0	1.10607e-18	1.40861e-17	0.00742641	9.13982e-19	0	0.0323934	0.0178395	0.0511107	0.118693	0.0169069	2.08099e-17	0.107879	0.00056907	0	0.00671513	0.00586208	0.0273417	0	0.0490825	0.115213	0	0	0.124682	0	0.172218	0.00422292	0.00188659	0.0180495	0.0496454	0.0297844	0.00506472	0.130961	0	7.49039e-18	0.0178153	1.54427e-17	0.0303123	0.00694696	0.00455765	0.0322092	0	0.121709	0.00632594	0.0666071
GSM914513	1.14469e-20	0	3.60491e-19	0.0476543	0	0	0	0.00125758	2.05187e-18	0.00646616	0.0305224	0.0187367	0.0640598	0.149404	0.00732288	0	0.0265716	0.0107862	7.97907e-05	0.0247746	0.00812108	0.0328106	0.0552395	0.0268335	0.262897	3.22637e-19	0.000415369	0.115799	0	0.0960049	0.0184518	0.0111632	0.0248176	0.046748	0.0350745	0.0106921	0.0186675	0.0037031	5.05608e-18	0.032207	0	0.117323	0.00455716	0.00338915	0.00311665	2.13023e-17	0.0439054	0.0486752	0.0709098
GSM914514	0	5.19379e-18	0.00354215	0.147524	0	1.925e-18	0	2.70345e-20	0	0	0.0181021	0.00232436	0.0196601	0.028611	0.0151367	6.63024e-18	0.0155222	1.53258e-19	0.00498145	0	0.0156567	0.00606564	0	0.00504389	0.146784	0	0	0.0473281	2.05251e-19	0.141977	0.0299771	0.0219134	0.0158462	0.0286881	0.0530974	0.00545058	0.0295943	4.80842e-20	6.65045e-20	0.0116848	0	0.0567652	0.0032914	0.021082	0.0877798	3.69737e-19	0.0338175	0.0215832	0
GSM914515	1.27615e-18	0	2.88723e-20	0.142334	5.09135e-18	0	1.56919e-17	0.0032503	2.11085e-18	0.00167384	0.0351504	0.0230332	0.0304675	0.0658246	0.0119459	0	0.0225443	0.0039083	0.0044177	0	0.00270679	0.0308642	2.01831e-18	0.00701752	0.146811	0.00390085	0	0.0862432	0	0.135565	0.0246818	0.0297231	0.0225022	0.0372837	0.0471047	0.00485754	0.0237924	0.0116691	8.04e-18	0.0144076	0	0.0375208	0.000913189	0.00465369	0.0631998	0	0.042511	0.0477081	0
GSM914516	0	2.45959e-18	0.161762	0.129732	1.16543e-17	0	1.43686e-17	0.011608	1.97684e-19	0.0409491	0.0634524	0.0454596	0.0435056	0.0635994	0	6.16041e-18	0.0980514	1.13952e-20	2.49401e-21	0	0.00426585	0.00985111	7.06241e-19	0.000329974	0.0874094	1.51423e-19	9.4465e-19	0.0882291	6.44941e-19	0.131245	0.0201704	0.0169247	0.0268107	0.0388924	0.025405	0.00407078	0.12655	0	1.11144e-18	0.00996586	1.97636e-18	3.78225e-20	0.00363871	0.00138641	0.0785444	0	0.0682315	0.00669325	1.85462e-18
GSM914517	4.98832e-19	0	0.0804394	0.0930729	0	0	1.84446e-17	2.20652e-21	9.77903e-19	1.19788e-19	0.0209382	0.0315778	0.0448622	0.0841496	0.0075168	0	0.0416322	0	0.00637135	0	0.00730031	0.0341847	6.94422e-18	0.0178264	0.182801	0.00228236	0	0.0756178	0	0.11381	0.0389313	0.0218741	0.0159767	0.0311493	0.0624521	0.00523391	0.0949359	2.67436e-19	2.53564e-20	0.0196298	0	0.0436201	0.00295907	0.019415	0.03749	0.00815572	0.0424411	0.0362868	0
GSM914518	0	1.63735e-18	0.0320541	0.187572	6.22904e-18	0	9.61921e-18	0.0100588	0	0.0333528	0.0463814	0.0285607	0.0390924	0.0676677	0.0247494	4.48451e-18	0.0202358	1.47184e-19	4.02567e-20	0.0106904	0.00272686	0.0155498	1.73795e-18	0.0414169	0.121284	4.71607e-19	6.92949e-19	0.09711	0	0.190542	0.0188659	0.0144158	0.018668	0.0494737	0.0339038	0.00475322	0.050939	2.99916e-19	0	0.0109134	6.38468e-18	0.0141	0.00270613	0.0051435	0.0472519	0	0.0449781	0.022184	1.48665e-18
GSM914519	0	2.51831e-18	0.0335717	0.179652	0	0	9.00644e-18	0.0124521	2.59162e-19	0.0236994	0.045234	0.0298452	0.0345255	0.0607534	0.0150632	2.25288e-18	0.027343	0.00134605	5.79823e-21	0.0147021	0.00705636	0.00532168	2.33287e-18	0.0573351	0.101754	0	0	0.091793	0.0011377	0.148665	0.0262058	0.0169887	0.0241641	0.037973	0.0261137	0.00434137	0.0406826	2.85086e-18	0	0.00386181	1.97231e-17	0.0229075	0.00231593	0.0074318	0.069034	0	0.0429216	0	0
GSM914520	1.78881e-20	4.86955e-18	0.00219732	0.159555	3.28147e-18	4.64184e-18	0	1.84058e-19	0	0	0.00538032	0.000141384	0.0365276	0.055721	0.019933	0	0.0110807	0	0.000534211	0.0204351	0.00703792	0.023707	0.00557539	0.0416472	0.144038	0.000246523	5.53406e-19	0.0686929	0.00175363	0.0781157	0.025604	0.0176672	0.0177403	0.0404871	0.0601624	0.00591428	0.0308948	0.00462384	0	0.0119593	3.84318e-18	0.0456214	0.00077514	0.0139384	0.0499006	1.73236e-18	0.0292689	0.0547462	3.64598e-18
GSM914521	3.96692e-19	0	0.12669	0.105697	4.75685e-18	7.30248e-18	1.57036e-17	0.0117216	1.01097e-18	0.0673643	0.0769623	0.0746401	0.0241371	0.0512316	0.00556877	1.08221e-18	0.0715562	0.00750924	8.42162e-21	0.0201386	0.00161934	0.00400328	4.8012e-18	0.038179	0.065699	0.000112894	6.07798e-19	0.0889428	1.32594e-19	0.156756	0.0151891	0.0116243	0.0255312	0.0365206	0.00404572	0.00394134	0.102227	0.0096673	1.49692e-19	0.0149892	0	0.0153918	0.00237676	0	0.0631491	4.3761e-19	0.0622399	5.07775e-18	0.00311732
GSM914522	8.18414e-19	1.214e-17	0	0.140028	0	2.22695e-17	0	1.81244e-18	7.33228e-18	6.34212e-18	0	0	0.0155307	0.022527	0.0230895	0	0.0152412	0	0.00394785	0.00986411	0.014538	0.00570189	1.28027e-19	0.0622985	0.172347	0.00337734	2.41013e-18	0.0714187	0.0114173	0.224524	0.0392997	0.032536	0.0220801	0.031246	0.0563749	0.00596785	0.021437	2.12345e-18	0.00846044	0.00829853	4.44781e-17	0.0521635	0.0013763	0.0264189	0.0606454	0.010179	0.0309312	0.0196526	2.20739e-17
GSM914523	0	1.03697e-17	6.40245e-20	0.17726	0	1.2393e-19	0	0	0	0	9.56386e-21	0	0.0319302	0.0457073	0.0275412	0	0.033919	2.24352e-19	0	0.00907787	0.0156526	0.0137876	0	0.10113	0.138635	4.72039e-18	0	0.0572788	0	0.288698	0.0256257	0.0182055	0.0173618	0.0292785	0.0391578	0.00475415	0.0163397	0	0.00223155	0.00469621	4.25428e-17	0.0311088	0.00316251	0.0203516	0.0385979	9.63353e-18	0.0546124	0.00226403	0
GSM914524	3.21066e-19	2.32099e-18	0	0.125148	0	0	0	5.47158e-19	0	3.59329e-18	0.00941899	0.000413213	0.0317932	0.0694256	0.0179531	2.3442e-18	0.00560638	0	8.28199e-05	0.00115328	0.000763809	0.036743	6.41777e-19	0.00791664	0.18744	0.00294364	0	0.0905314	0	0.244306	0.0163065	0.0265096	0.0183328	0.0386535	0.067661	0.00605306	0.00698082	0	5.44618e-19	0.0131374	3.85267e-18	0.0212838	0.00153971	0.0129995	0.00710861	0.0251891	0.0268453	0.0965075	2.04178e-17
GSM914525	1.95648e-19	1.33395e-18	0.0426683	0.106425	0	0	0	0.00109272	1.30663e-19	0.0249279	0.0333436	0.0484091	0.0188831	0.0511423	0.00863928	0	0.0223841	0.00338996	0.000695145	0.00264349	0.0113803	0.00421221	1.31939e-19	0.0365396	0.119869	0.0011843	0	0.115056	0.00499234	0.175922	0.0322035	0.0234414	0.0231403	0.0387999	0.0478076	0.00345298	0.0523488	0.00769644	5.6792e-19	0.0064566	0	0.0288973	0	0.00625303	0.069739	0.0367741	0.0388471	0.0503574	1.54171e-17
GSM914526	3.53649e-19	8.23812e-19	5.65323e-19	0.144195	9.74989e-18	8.43594e-19	1.76638e-17	0	0	0	0.0109209	0.0192713	0.039937	0.0664395	0.0117922	5.0001e-18	0.0126428	0	0.0103177	0.0158708	0.00902375	0.0186136	0	0.0388823	0.17165	5.1877e-19	0	0.0864785	0	0.177994	0.0258174	0.0168414	0.0201061	0.0341318	0.080783	0.00386601	0.0180126	1.672e-18	3.17724e-18	0.0116966	3.27853e-18	0.0305153	0.000624844	0.00662767	0.0288744	0	0.038344	0.0885763	5.2027e-18
GSM914527	0	0	0.0275057	0.156392	7.26589e-18	0	1.2768e-17	0	3.75014e-18	0.0286545	0.032001	0.0445604	0.0510588	0.0958228	0.00571191	7.14844e-18	0.0267823	0.00366778	0.00632688	0.00156065	0.00321862	0.0190329	0	0.0117079	0.184755	0.00261866	5.89565e-20	0.106597	4.40416e-19	0.140594	0.0148384	0.0227779	0.024393	0.0452282	0.0580931	0.0056669	0.0457552	0.0121795	1.96014e-18	0.0154272	1.6694e-17	0.0761753	0.000855328	0	0.0515196	0.00765653	0.0528232	0.0397244	0
GSM914528	0	0	0.0381768	0.102175	2.69301e-18	0	1.14264e-17	0	2.98765e-19	0.0353056	0.0458195	0.0333224	0.0347952	0.0665842	0.0157982	0	0.0455563	0.00156642	1.25782e-19	0.0123638	0.00777544	0.0166084	0	0.0125026	0.111909	0.00279742	0	0.114727	1.42072e-17	0.161458	0.0170029	0.00834283	0.0330596	0.0490657	0.022815	0.00681985	0.0485177	0.0100283	2.17537e-18	0.00914553	0	0.0747593	0.00239332	0.0176767	0.0499741	0.0137442	0.0332832	0.00674382	3.72719e-19
GSM914529	0	0	0.0595413	0.131832	3.82752e-18	0	0	1.65919e-18	9.53567e-18	1.36311e-17	6.14263e-19	0	0.0177871	0.0594208	0.0297033	2.10894e-17	0.0432858	0.00136121	0.00868534	0.0237395	0.00452462	0.0168662	0.0221913	0.0387215	0.165497	0.00620378	0	0.0895943	1.38191e-20	0.127018	0.0323018	0.0230826	0.025997	0.0425609	0.0426346	0.00680366	0.0800762	0.00634408	0	0.0120453	2.14187e-17	0.0563179	0.00227542	0.0210143	0.0679379	0.0560322	0.0583609	0.0156285	0
GSM914530	0	9.41191e-19	0.0251658	0.142056	2.59923e-18	0	1.09044e-17	0.00599255	0	0.0653067	0.0573759	0.0734609	0.0392482	0.0659591	0	5.45275e-18	0.0442796	0.00231256	5.4274e-19	0	0.000859359	0.00942886	0	7.63722e-19	0.0993674	0.000985183	0	0.101586	1.3285e-18	0.160628	0.00431588	0.0100725	0.0219872	0.0347925	0.021416	0.00404863	0.0354762	0.0126821	0	0.0129985	4.05115e-18	0.0376272	0.0011644	0	0.0746556	0	0.0516249	0	0.0040305
GSM914531	1.67093e-18	1.21991e-18	0.0899872	0.168726	4.36107e-18	0	1.7486e-17	2.2718e-19	0	0.0162192	0.0397841	0.0518256	0.0189775	0.0389218	0.02686	3.7827e-18	0.0310559	0.00403131	9.44173e-20	0.0284093	6.84195e-21	0.00569035	0	0.00594066	0.100914	0.00285041	1.15554e-19	0.0945525	1.61053e-18	0.233625	0.0217962	0.0299229	0.0270183	0.0357304	0	0.00491706	0.092281	0.00639905	0	0.00790468	0	0.00180063	0.00357499	1.19299e-19	0.0896825	0.0345977	0.0476662	5.23983e-19	1.08909e-17
GSM914532	8.83819e-19	1.69278e-19	0.072828	0.147548	0	2.10334e-19	0	0.00221272	0	0.00185254	1.96296e-20	1.32387e-19	0.0288162	0.0413066	0.0109541	0	0.0209303	0.00297735	0.00784329	0.00897027	0.00962779	0.00378248	2.43998e-17	0.0486308	0.162236	0.00101794	0	0.0950506	0.0133188	0.180442	0.0370552	0.0260799	0.0243143	0.0384528	0.0543844	0.00398576	0.0639952	0.00508552	2.56525e-18	0.00147773	5.86764e-18	0.067797	0.000334857	0.00835701	0.0790515	0.0165174	0.0470401	0.0407048	1.00195e-17
GSM914533	0	1.66778e-17	0.135324	0.159486	0	6.7538e-18	1.64703e-17	0.0114723	0	0.0438579	0.0612263	0.0648656	0.0432567	0.0499987	0.0198378	4.42304e-18	0.0889707	0.0034195	9.02732e-20	0.0286549	0.00444805	0.00374025	0	0.0324507	0.0616808	0	1.92358e-19	0.0924111	6.43061e-19	0.212494	0.00809627	0.0150786	0.0199071	0.0349233	0.000377217	0.00354068	0.103444	0.00680896	0	0.00510722	4.07874e-18	0.00297168	0.0022123	0	0.0765526	0	0.0904743	0	1.21083e-17
GSM914534	3.05042e-19	0	0.130549	0.148425	1.02801e-17	2.63012e-19	1.42092e-17	0.00175044	0	0.0425715	0.0576295	0.0516585	0.032338	0.0678032	0.0145514	4.04351e-18	0.0796502	0.00208065	0	0.0095936	0.00557568	0.013691	2.8738e-18	0.016083	0.0864649	0.00161412	0	0.110175	0	0.169122	0.0164373	0.0221224	0.0247781	0.0433047	0.0127252	0.00414759	0.106241	0.0121417	0	0.00935725	0	0.0194329	0.00195289	0.000152381	0.0844458	0.0389422	0.0598117	0	0
GSM914535	6.59549e-20	5.30967e-18	0.0280971	0.114985	2.38397e-18	0	1.13521e-17	0.00266906	8.42487e-19	0.0358587	0.0428818	0.0365936	0.0434285	0.11949	0.00922223	1.94713e-17	0.0289724	0.00894706	0.00299971	0.0110281	0.00224432	0.0191794	0	0.0204604	0.18517	9.24509e-19	0	0.0965379	0	0.210139	0.019124	0.0111494	0.025391	0.0388056	0.0537154	0.00515848	0.0510658	3.34927e-19	2.78709e-18	0.0184117	1.1434e-17	0.0356245	0.00348236	0.00230689	0.0661917	0	0.039826	0.0571161	2.90314e-19
GSM914536	0	2.77024e-18	0.0501788	0.112266	2.70799e-18	1.21832e-19	1.57403e-17	0.00180279	5.55897e-20	0.0423968	0.0427288	0.054111	0.0359414	0.0767481	0.008506	0	0.0327031	0.00392429	3.14579e-20	0.0160608	0.00418724	0.0105138	0	0.015002	0.116074	0.00163632	1.91176e-19	0.10445	0	0.169175	0.0173419	0.0155432	0.0274906	0.0448842	0.0270922	0.00561034	0.0578011	0.0167861	0	0.0139489	0	0.0172027	0.00285805	0.00247274	0.0580802	0.0285691	0.0354202	0.0235909	6.28393e-18
GSM914537	0	4.77361e-18	0.106273	0.128231	0	0	1.22585e-17	0	4.79934e-18	0.0280796	0.0353232	0.0357215	0.0203805	0.0594984	0.0171542	0	0.0431357	0.00603436	0.00337627	0.0291551	0.0068428	0.0171892	0.0100093	0	0.147758	0.00416501	5.81277e-20	0.117187	0.00555398	0.2452	0.00898776	0.0210743	0.0150807	0.0404606	0.0519412	0.00500406	0.099882	0.0242844	2.46339e-18	0.0184904	0	0.0260048	0.00160603	3.74977e-19	0.0589504	0.0574698	0.0488488	0.0492694	0
GSM914538	0	1.95272e-18	0.0783029	0.146298	1.0001e-18	6.50918e-19	3.02361e-17	0.00619642	0	0.077633	0.067764	0.0635408	0.0265577	0.0713704	0.003501	0	0.0371505	0.00126832	0.000526922	0	0	0.00609728	0	7.25234e-19	0.0844733	0	0	0.096137	2.302e-18	0.201135	0.0116809	0.0154032	0.017887	0.0353479	0.0303092	0.00339866	0.0723071	0.0103168	0	0.00650436	4.42056e-19	0.00129984	0.00101864	3.2116e-22	0.0660833	6.62627e-19	0.0426405	0.0172979	1.31117e-18
GSM914539	0	8.56435e-18	0.118468	0.120318	0	0.0216469	2.98727e-19	0.0236799	0.00756445	0.0899286	0.0646118	0.0497072	0.0352296	0.0501105	0	1.30958e-18	0.0492245	0.00480881	0	0.00219688	0.00396285	0	2.96379e-19	2.53763e-18	0.0916537	2.91833e-19	5.50958e-19	0.0910331	0	0.174997	0	0	0.0190886	0.0359918	0.0132191	0.00306893	0.107784	0	3.3044e-18	0.00432803	0	8.53385e-19	0.00394249	0	0.0674075	0	0.050742	0	5.42315e-19
GSM914540	0	6.43765e-19	0.0885854	0.098294	1.71092e-18	6.23648e-18	8.09807e-18	0.0114391	2.30395e-19	0.0721527	0.0715694	0.0704103	0.0376201	0.0761608	0.00764521	0	0.067823	0.00367282	0	0.0121293	0.00584951	0.00599069	9.13124e-18	0.039186	0.0942806	0	0	0.0960622	2.24633e-18	0.209861	0.0110259	0.0068492	0.0221238	0.0362198	0.00787675	0.00333032	0.0754363	0	5.5782e-19	0.013587	0	0.0365865	0.00273267	0.00293133	0.0537579	0	0.0605627	0	0
GSM914541	6.21145e-21	8.11129e-18	0.0642258	0.139316	1.09516e-17	0	1.48849e-17	0	0	0.0237089	0.0466253	0.0384857	0.0191473	0.0685992	2.66468e-20	2.71923e-18	0.0371056	3.75876e-22	0.000296114	0	0.000979155	0.00981053	0.0252265	7.64507e-18	0.113453	0.00383862	5.85426e-19	0.0970697	8.3773e-20	0.22666	0.0273039	0.0306404	0.0332727	0.031558	0.0391028	0.0060268	0.0725323	0.0146955	0	0.0146805	2.22565e-18	0.0369797	0.000906227	0.00028698	0.0761772	0.00583676	0.0411998	0.0238906	1.62395e-18
GSM914542	3.19186e-20	1.88518e-17	0.147722	0.0906547	5.55552e-18	0	8.89007e-18	0.00245766	2.66123e-19	0.0658388	0.0530196	0.0527638	0.0325444	0.082742	0.0106884	0	0.0901564	0.00719648	0	0.018815	0.00620774	0.0137752	0.0379433	0.011063	0.126404	0	9.61633e-20	0.11552	0	0.219468	0.0167384	0.016104	0.0232163	0.0410371	0.014342	0.00446024	0.127745	0.00408117	4.75227e-18	0.017978	3.32492e-18	0	0.00724546	0	0.0596477	1.17514e-18	0.0789819	0.000897673	0.0320151
GSM914543	2.14574e-18	6.0405e-18	0.115798	0.113274	0	0	0	0.0267492	5.97246e-19	0.085386	0.0897608	0.0829179	0.0387455	0.0605332	3.79784e-19	3.76755e-18	0.078106	0.00281855	0	2.84843e-18	0.0010849	0.00743448	1.43519e-18	0.00654723	0.0686379	1.91773e-20	1.61962e-19	0.104604	0	0.154884	0.0058704	0.00754477	0.0238129	0.0333225	0.00718484	0.00369309	0.0934207	0.00380778	0	0.0108118	0	0.0190872	0.00771892	9.87027e-19	0.0755234	2.68602e-18	0.0833401	0	0.0213
GSM914544	1.57983e-18	5.14628e-18	0.118533	0.0869423	0	1.14341e-17	2.39327e-18	0.0353545	0	0.0962192	0.104808	0.0837758	0.0375497	0.0919584	0	5.54767e-18	0.0840213	0.0015219	9.40113e-19	7.32623e-19	0.00474955	0.00502543	0.00221724	0.028053	0.0619064	2.08987e-18	2.87174e-20	0.0966567	0	0.158307	0.00561765	0.0104785	0.0231435	0.0305769	0.00376337	0.00395446	0.081172	0	5.48008e-18	0.0121203	0	0.00156338	0.00273271	0	0.0568618	1.18823e-17	0.0921411	0	0.0251238
GSM914545	7.90684e-19	0	0.0534024	0.121493	0	0	0	0	6.6722e-19	0	0.0237361	0.0240922	0.0129331	0.0565862	0.0159015	2.64256e-17	0.0293893	2.66512e-21	0.00337232	0.0105999	0.0104967	0.00241127	0	0.0346461	0.118624	0.00214463	0	0.0720697	0.00274731	0.150824	0.0239777	0.0266425	0.0170979	0.0346277	0.0570588	0.00537249	0.0645851	0.00153042	1.76792e-18	0.00680587	3.0612e-17	0.0568268	0.00113193	0.0135212	0.0885874	0.0206533	0.0359415	0.0415915	3.61673e-18
GSM914546	0	4.19584e-18	0.0678176	0.0901739	6.52641e-18	2.65634e-19	1.53326e-17	1.46587e-18	0	0.0730305	0.0695049	0.0362315	0.02826	0.0939687	0.0158845	0	0.0282938	0.00401594	0.00196713	0.0161706	0.00433279	0.0159658	1.05052e-19	6.21659e-19	0.163692	9.89244e-21	0	0.121634	0	0.201485	0.00509185	0.00713705	0.018658	0.0458545	0.023409	0.00470231	0.0781297	0.00163175	5.82007e-18	0.0157635	0	0.0206247	0.00458677	0.000699355	0.0532281	0	0.0455147	0.0139481	0
GSM914547	6.59557e-19	4.02431e-18	0.100106	0.17843	2.45701e-18	0	0	0.0137577	0	0.0728841	0.0663703	0.0582154	0.0260218	0.0668868	0.00428437	0	0.04459	0.00328085	0	1.05795e-18	0	0.00611943	0	0	0.104223	0	1.65733e-19	0.134288	3.15035e-19	0.19824	0.00874492	0.0149988	0.0236675	0.0263315	0.00205817	0.00455318	0.0972162	0.00591456	3.61234e-17	0.00604908	8.74351e-18	0.0142942	0.00429562	0	0.0839728	0	0.0637001	5.25911e-18	0.000382052
GSM1249177	2.93096e-19	1.72293e-17	0.114637	0.21342	0	5.8159e-19	1.84069e-17	7.24432e-06	0	0	0.016689	2.1113e-19	0.0600891	0.0642955	0.0276359	2.37341e-17	0.0799114	0	0.0133358	8.74033e-19	0.010947	0.0266966	0	0.0859446	0.134273	0	0	0.0883459	0.00610492	0.0645804	0.0252243	0.0292775	0.0212299	0.0467519	0.0564117	0.00548761	0.0956483	0.00259947	5.55579e-19	0.0130425	1.24888e-17	0.00787045	0.00285729	0.0131419	0.0571672	0	0.079292	0.00595732	4.36872e-18
GSM1249178	0	9.73805e-20	0.136962	0.205997	7.35274e-18	0	2.02333e-17	0.0144371	1.95943e-19	0	0.0251785	0.00148197	0.0660728	0.0937707	0.0279901	0	0.0789546	0.00119646	0.00534378	0.000679288	0.00981443	0.0255075	0	0.0920005	0.16663	5.12826e-22	9.67246e-19	0.0961466	0.00771466	0.180624	0.0164958	0.00747348	0.0210676	0.0371487	0.04476	0.00465326	0.10786	0	0	0.0125646	1.22609e-17	0.0154764	0.00567619	0.00709136	0.0353407	0	0.0821906	0.0158622	0.000612144
GSM1249179	2.60864e-19	2.86961e-18	0.0256016	0.178223	0	2.54402e-18	1.71985e-17	0	0	0	0.0235945	0.0078257	0.0474303	0.0768356	0.0165295	0	0.0404828	0	0.00554234	0.00923054	0.00817497	0.0255572	0	0.0682637	0.135513	0	0	0.079218	0	0.149926	0.024695	0.020213	0.0188138	0.0448279	0.0661809	0.00366718	0.031813	5.54625e-18	4.71093e-18	0.0196458	0	0.0354302	0.00508219	0.00640899	0.034517	0	0.0600923	0.0542108	7.03448e-18
GSM1249180	0	0	0	0.176988	1.3854e-17	0	0	0.00134905	0	2.16673e-19	0.00327094	0	0.0497306	0.0663361	0.0125264	6.36092e-18	0.0082294	0.000495786	0.00547961	0	0.0259428	0.0117181	1.76798e-17	0.0561526	0.138736	0	4.40194e-19	0.0558212	3.97e-19	0.213494	0.0422996	0.0254751	0.0284658	0.0268421	0.0282842	0.00595965	0	1.55449e-18	0.00163397	0.00829806	0	0.0883796	0.00106413	0.0204591	0.0479954	0	0.0341511	2.04254e-18	2.56169e-17
GSM1249181	1.72996e-19	7.67634e-18	0.0514999	0.126086	0	1.3382e-19	2.797e-17	0.0025677	0	0	0.0033184	1.92113e-18	0.0567193	0.138675	0.00251736	3.40932e-18	0.0244931	0.00827617	0.0126122	0.00091984	0.0049835	0.0192614	0.000749202	0.0743049	0.21658	0	1.12705e-18	0.108209	0	0.123092	0.0120259	0.0137609	0.0213528	0.0356649	0.0740951	0.00360319	0.0720133	0	0	0.0159694	0	1.38051e-19	0.0031399	0.00527824	0.0399453	1.59411e-17	0.0751503	0.103942	2.93225e-18
GSM1249182	0	7.79373e-19	1.02404e-18	0.15089	4.20339e-18	0	1.67311e-18	0.00681257	0	1.89465e-18	0.0166022	0	0.0644637	0.101599	0.00661228	0	9.29038e-19	1.90003e-20	0.00768684	0	0.0125928	0.0142572	1.19293e-18	0.0944337	0.135514	2.50559e-19	6.87507e-20	0.0557716	0	0.0651747	0.0372218	0.0263955	0.0279278	0.0316371	0.0539379	0.00471109	0	0	0	0.00583201	1.10017e-17	0.0534465	0.00235065	0.019033	0.0361129	7.27498e-18	0.0257569	0.0244547	2.69152e-18
GSM1249183	3.17266e-19	8.55575e-19	0.0868414	0.228533	0	9.09988e-18	1.81694e-17	0.00534252	0	6.50065e-20	0.026266	0	0.0608761	0.0770576	0.0315938	0	0.0567968	0	0.00363408	0	0.00961747	0.0307831	0	0.0658806	0.173729	0	0	0.0694993	0.0108142	0.128834	0.0158924	0.00900112	0.0234819	0.0404349	0.059033	0.00363458	0.0772129	0	2.42538e-18	0.0173138	1.55854e-17	0.00578057	0.00286133	0.000399976	0.0364208	0	0.0877832	0.0499283	1.29545e-17
GSM1249184	0	1.31646e-17	0	0.129703	0	0	2.44466e-18	0	0	5.68695e-18	2.44394e-17	5.97273e-18	0.0474469	0.0967433	0.00357453	0	0.0218864	0	0.0153966	0.000605733	0.0152455	0.0158409	0.00712892	0.0539219	0.152899	0.000500748	0	0.0481269	1.32805e-19	0.0275966	0.0405758	0.0290322	0.0264322	0.0348457	0.0651293	0.00550991	0.000596159	1.27178e-18	0.00924465	0.00516247	4.62984e-17	0.0880907	0.00391014	0.0280599	0.0672865	8.19968e-18	0.0387901	0.020383	0
GSM1249185	0	4.07563e-18	0.0560725	0.17319	4.6957e-18	6.64551e-18	0	0.0328494	0	0.0629933	0.0640143	0.046046	0.0650622	0.0855991	0	0	0.0479917	0.0040701	0	0	0.00145649	0.00998833	0	0.00232784	0.0616305	5.45863e-19	0	0.113034	0	0.116692	0.0133532	0.0269755	0.0232019	0.0296644	0.014928	0.00425429	0.0485831	0.0045644	1.11192e-18	0.00723302	0	0.00135894	0.00150839	0	0.0754267	2.24903e-17	0.0639409	1.66751e-18	2.34997e-18
GSM1249186	1.75311e-18	8.29171e-18	1.7155e-19	0.148177	0	0	3.95367e-17	0	0	0	0	2.03683e-17	0.0379713	0.0742272	0.0218255	0	0.00802547	6.08618e-21	0.0160856	0.0020008	0.0174557	0.0365766	0	0.0752	0.196585	0	0	0.0546649	0.014642	0.110545	0.0412722	0.0363283	0.0255324	0.0352845	0.0631	0.00540201	0.0156023	6.18107e-19	0	0.0123681	3.21812e-17	0.0226666	0.00293327	0.022351	0.039102	1.34505e-17	0.0357317	0.023471	0
GSM1249216	1.04985e-18	0	0.127139	0.203052	5.72179e-18	0	0	0.013952	1.06599e-17	4.7553e-19	0.0198988	0	0.0594161	0.112208	0	0	0.0720737	0.00124561	0.00616607	1.29803e-18	0.00295406	0.0278037	0	1.08327e-17	0.16227	0.00265563	3.85339e-20	0.115586	3.48251e-18	0.14337	0.0125379	0.0106613	0.0194674	0.0291521	0.0467214	0.00518778	0.102979	0	0	0.0200426	1.3047e-17	0.00549449	0.00188827	0	0.0837751	0	0.125075	0.0331493	0.00779483
GSM1249217	0	2.10019e-18	0.127515	0.172853	0	6.1476e-18	1.64846e-17	0.00463608	7.4865e-18	0	0.0141014	0	0.0610181	0.0777565	0.0028848	0	0.0387572	0.00156478	0.00415375	5.06142e-19	0.00316423	0.0259588	0	1.25153e-18	0.188921	0.00128425	0	0.0893512	1.45717e-18	0.133877	0.0341743	0.0259298	0.0288299	0.0331164	0.0437686	0.00434657	0.10701	5.33814e-20	0	0.0214898	1.0765e-17	0.026405	0.00149122	0.00573922	0.0648687	3.10195e-21	0.0848203	0.0133526	1.24242e-17
GSM1249218	4.90754e-19	3.92023e-18	0.0358869	0.167165	6.87132e-19	0	1.39488e-18	0.018385	0	0.0252957	0.0253467	0.00140756	0.0586432	0.141058	0.0193516	0	0.0108402	0.0084833	0.000324655	0.0100879	0.00439702	0.024231	0	0.0855684	0.147746	9.65683e-20	0	0.102524	0.0121428	0.0921446	0.0205568	0.0244778	0.0206809	0.0522197	0.0289014	0.00539716	0.0423779	0	8.60817e-18	0.0144983	2.06318e-18	0.00469505	0.00170909	0.000356748	0.0595201	0	0.0634466	0.0174677	0
GSM1249219	0	3.20693e-18	0.0161334	0.118918	0	6.77974e-18	8.99706e-18	0.00244246	5.05795e-18	1.55e-18	1.13002e-18	0	0.0489301	0.0594266	0	6.55085e-18	0.0266316	0.00166062	0.0126996	1.07329e-20	0.012832	0.01889	0	0.0259146	0.203233	0.00171882	1.03337e-19	0.0591152	1.62617e-18	0.0361498	0.0386697	0.0245198	0.0212851	0.0299812	0.0761424	0.00544072	0.034209	0	0.00292384	0.0153244	0	0.057392	0.00300238	0.0175684	0.0381898	0	0.0553313	0.0957067	5.91705e-20
GSM1249220	0	2.93822e-18	0.00282684	0.140703	0	3.63438e-18	0	0.00460431	1.08072e-18	1.66154e-18	2.84491e-18	0	0.040681	0.0613516	0.00490604	0	0.00657771	0.00210768	0.0104075	0	0.0160169	0.0151774	4.11072e-18	0.0715013	0.190929	0.00116298	1.54794e-19	0.0837143	0	0.0273035	0.0387045	0.0252478	0.0245922	0.0352502	0.0638019	0.00474035	0.016448	0	2.64495e-19	0.0117073	1.56576e-17	0.0587136	0.000298937	0.0172043	0.0591937	4.70611e-18	0.0445901	0.0434442	0
GSM1249221	6.58339e-19	0	0	0.139777	0	0	7.22172e-18	0.0140994	0	0.0152121	0.00590497	5.2852e-18	0.0684345	0.078392	0.0134911	0	0	0.00105813	0.0027267	0.00490057	0.00847644	0.0236605	0	0.0887707	0.176611	0	5.93981e-20	0.0953148	0.0107622	0.133647	0.0180376	0.00976684	0.0248401	0.0397988	0.0509752	0.00327046	0.0136057	5.32251e-18	0	0.020457	1.36162e-17	0.0648475	0.00149062	0.0104169	0.0341979	5.59363e-20	0.0342609	0.0430583	0
GSM1249222	0	2.303e-18	0.0413986	0.148613	0	0	2.56166e-17	0.0100987	1.31377e-18	0	0	0	0.0539223	0.106288	0.0118992	2.58596e-17	0.0399225	0.00136466	0.00778617	0.010633	0.0157218	0.0294769	0	0.0688197	0.187054	0	2.97748e-19	0.0994795	0.00750845	0.140202	0.0340148	0.0150683	0.0249545	0.0434331	0.0687959	0.00351507	0.0508624	5.43965e-18	7.57181e-18	0.0104003	1.99847e-17	0.0364344	0.00352316	0.00930129	0.0222938	2.85229e-18	0.0589751	0.0797302	2.38679e-17
GSM1249223	2.65101e-18	6.27512e-18	0.102328	0.113835	2.81975e-19	0	4.62429e-18	0.0205068	0	0.0301092	0.0257723	0	0.0720278	0.0942188	8.62792e-19	0	0.0724759	0.00160989	0.00103476	0	0.014102	0.0125997	1.52622e-18	0.0676346	0.13464	0	0	0.103008	0	0.219728	0.0246525	0.0178157	0.0256366	0.0331082	0.0225905	0.00324757	0.0745994	3.53375e-18	4.08572e-19	0.00493438	0	0.0352121	0.00189009	0.00810462	0.0261706	0	0.0696237	0	4.70738e-18
GSM1249224	0	3.54903e-18	0.104791	0.232355	0	6.84525e-19	2.962e-18	0.0117264	0	2.63915e-20	0.019077	0	0.0560578	0.0609024	0.0071085	0	0.0271252	0.000785386	0.0117391	2.85504e-19	0.00609406	0.0225486	0	0.0341421	0.160914	5.61713e-19	1.45509e-18	0.113336	0.00295856	0.118347	0.0226587	0.0297263	0.0197398	0.0423555	0.0735302	0.00292673	0.101414	8.61374e-19	1.97226e-17	0.0165206	0	0.0173239	0.00133018	0	0.03996	2.75754e-18	0.0733854	0.0598409	1.32336e-17
GSM1249225	3.02384e-18	1.70293e-18	0.210423	0.123065	1.70525e-18	0	6.4997e-18	0.034428	8.54875e-19	0.00984906	0.0243226	3.83621e-19	0.049335	0.0761748	0	0	0.055564	0.000566343	1.01731e-20	1.1715e-18	0.00304539	0	0	0.0574779	0.0747915	6.83579e-19	1.80525e-18	0.0390018	0	0.103971	0.0251418	0.0104993	0.0244983	0.0176746	0.0301363	0.00305266	0.148804	0	4.42162e-19	0	1.91103e-17	0.0316713	0.00307392	0.00814319	0.0233621	0	0.0737937	0.00386326	0
GSM1249226	4.19279e-19	1.30167e-17	0.0392595	0.12407	8.4715e-18	0	1.14913e-17	1.15036e-18	0	7.481e-18	3.71405e-18	8.88736e-18	0.0386514	0.0959311	0.0181792	0	0.0424588	0.00543073	0.0134971	4.06513e-19	0.0266662	0.0327774	3.42429e-18	0.0426545	0.205716	0	0	0.07732	0.00885444	0.0789352	0.0347758	0.0316115	0.0223236	0.0332069	0.0593279	0.00681216	0.0576812	0.00506239	0	0.0185155	0	0.0706192	0.0028868	0.017187	0.0471119	1.39057e-17	0.0525448	0.0383502	3.00127e-18
GSM1249227	0	2.61852e-17	0.0149303	0.163504	1.92299e-18	1.87962e-17	2.19894e-17	5.60272e-20	0	0	6.29506e-19	0	0.0534312	0.0994888	0.0123267	0	0.0258463	5.53133e-19	0.0239589	0.00686318	0.0134757	0.0209745	0	0.0520063	0.206313	0	0	0.0472609	3.78473e-19	0.087067	0.0445056	0.0253367	0.0235146	0.0340493	0.0777249	0.00643155	0.0288238	2.82133e-18	3.09301e-18	0.00713181	0	0.0218361	0.00231656	0.0205334	0.0631651	8.93909e-18	0.0631654	0.0248512	1.25957e-17
GSM1249228	9.17711e-19	0	0.0594019	0.15225	2.49887e-18	8.53894e-18	0	0.022263	0	0.0064177	0.00919369	2.66132e-18	0.058744	0.0704291	0.0116811	3.00265e-18	0.0157585	0.00404588	0.00584996	0	0.0113197	0.0266874	0	0.068012	0.209208	0	1.09571e-19	0.105433	0	0.0969265	0.0193174	0.0108339	0.0211156	0.0506313	0.0880483	0.0025621	0.0628178	0.00345253	0	0.0173218	5.03522e-18	0.0237914	0.00137691	0	0.0352921	0	0.065516	0.104832	0
GSM1249229	1.64814e-18	6.15094e-18	0.211146	0.16566	0	2.35494e-18	5.15765e-18	0.0298121	1.38482e-18	0.0610065	0.0450943	0.0134658	0.0787292	0.121443	6.18133e-19	1.38395e-17	0.0744042	0.00440221	0	0	0.00222887	0.0137371	0	0.0371005	0.129497	2.14894e-19	5.29261e-19	0.0961305	0	0.0885756	2.99396e-19	0.00167282	0.0236302	0.0402783	0.0259112	0.00291006	0.160765	0	2.67147e-17	0.0094733	0	0	0.00688944	0	0.0489479	3.61036e-18	0.093204	0.00448335	0.00133474
GSM1249230	0	3.46632e-18	0.147457	0.171186	0	0	1.47207e-17	0.0077382	2.08578e-18	0	0.00397022	0	0.0594913	0.0937802	0.00268783	0	0.0475039	0	0.00850739	6.40143e-19	0.00786881	0.0219729	8.25123e-18	0.00983804	0.166453	1.32665e-19	3.05046e-19	0.093868	0.0039882	0.0940034	0.0310669	0.0230087	0.0234736	0.0299253	0.0619597	0.00407528	0.119565	0	9.31051e-20	0.0102705	8.46775e-18	0.04617	0.00288	0.00496418	0.0698085	0	0.0689961	0.0370931	7.88166e-18
GSM1249231	1.11752e-20	2.06882e-18	0.0893675	0.219228	0	1.44715e-18	0	0.0176616	0	0.0256502	0.0376149	0	0.0584176	0.0672283	0.00369737	0	0.0434144	0.000400337	0.00287529	1.16649e-18	0.00776789	0.0138193	5.65961e-19	0.0108602	0.162626	9.70178e-19	0	0.0912664	8.99759e-19	0.110254	0.0174164	0.0194868	0.0228054	0.0304317	0.0365535	0.0041307	0.0794078	0.0131867	1.74309e-17	0.00916186	0	0.0548222	0.00315628	4.59168e-20	0.0591651	1.02064e-18	0.072334	0.0125018	0
GSM1249232	0	7.55969e-19	0.187157	0.144736	4.21859e-18	7.12528e-19	0	0.00813033	1.14518e-18	0.00897432	0.0108435	0	0.0532786	0.0970268	0.00576066	0	0.0697852	0.0056144	0.00144621	0	0.00336798	0.022149	9.29966e-19	0.0222375	0.16127	0.000681767	0	0.11397	5.63197e-19	0.107211	0.00934886	0.00894947	0.0235617	0.0428917	0.0474264	0.00351465	0.152647	1.34163e-18	0	0.0114923	6.9145e-18	0.0143432	0.00312471	6.57889e-21	0.0707553	2.20805e-18	0.0841037	0.0376868	4.82037e-18
GSM1249233	3.39673e-19	1.39484e-17	0.177563	0.181775	0	2.67829e-18	8.32416e-18	0.0302342	0	0.0396114	0.0488874	0.0390831	0.0628428	0.115247	3.71747e-18	0	0.0569651	0.00547002	0	0	0	0.0162641	2.86909e-17	0	0.116461	2.05595e-18	0	0.131888	1.17127e-18	0.11461	0.00455766	0.0133884	0.0168745	0.0337035	0.0229088	0.00256289	0.141149	6.02374e-19	4.18016e-17	0.0107391	0	0	0.00385624	2.84194e-19	0.0727343	3.46207e-17	0.0900804	0	0.00579441
GSM1249234	0	6.47765e-18	0.185503	0.223914	0	1.01026e-20	4.63113e-18	0.0294524	0	0.071278	0.052265	0.0277966	0.0614456	0.0724538	9.56321e-19	4.32614e-18	0.0677568	0.00391798	5.76262e-20	6.45211e-18	2.48923e-19	0.00386868	0	0	0.0929813	0	0	0.108394	0	0.106859	3.33686e-19	0.00179604	0.0210448	0.0346601	0.0172568	0.00296522	0.142625	0.00247953	0	0.000806515	0	0	0.00442019	0	0.070969	0	0.0885947	0	0
GSM1249235	4.0622e-19	0	0.0745274	0.209347	6.32944e-18	7.93159e-18	1.38828e-17	0.0188937	0	0.00868413	0.0374772	0.0192202	0.0602546	0.0923969	0.00565332	0	0.0211831	0	0.00688955	8.85317e-19	0.00343744	0.0224384	0	0.0130732	0.124121	6.61717e-19	0	0.0831515	0.0234431	0.0970799	0.0168261	0.0131222	0.019838	0.0352495	0.0645531	0.00199131	0.0778826	0	1.49396e-17	0.0192957	0	0.0321263	0.0020112	4.45116e-19	0.0427489	1.42453e-17	0.0627867	0.0598233	2.21631e-17
GSM1249236	6.56015e-19	2.30188e-18	0.249549	0.170808	4.988e-18	0	7.03293e-18	0.0283222	4.99893e-19	0.0478744	0.0429128	0.0221401	0.0682724	0.0809249	3.47293e-19	1.53033e-17	0.0644771	0.00711234	0	6.48942e-19	0.00421506	0.0114914	3.58167e-19	0.0230808	0.119739	1.13155e-18	2.48719e-19	0.0995021	0	0.0791896	9.87621e-05	0.0049648	0.0224761	0.0412187	0.0240374	0.00251965	0.183404	1.23283e-18	0	0.00867333	0	0	0.00522386	0	0.059042	4.49091e-18	0.0898452	0.000356304	0.00110165
GSM1249237	5.76045e-19	2.73986e-18	0.153906	0.15147	0	0	9.81489e-18	0.0303956	0.0038138	0.0489952	0.0420558	0.00902053	0.0670194	0.089468	0.00147434	1.19883e-17	0.0497607	0.00621263	0	0.00643822	0.00988057	0.0124177	1.11068e-17	0.0283624	0.136392	0	0	0.085585	0	0.0910394	0.00671242	0.00884306	0.0213447	0.0394747	0.0242391	0.00342386	0.129257	5.17583e-19	0	0.0136972	1.27488e-17	0.00398797	0.0037097	0	0.0330652	2.13553e-17	0.077819	0.0155548	0
GSM1249238	0	8.06227e-18	0.136371	0.154815	0	0	0	0.0446927	0	0.0689886	0.0486172	0.0349357	0.0660132	0.0904402	0	3.02628e-18	0.0528859	0.0135399	1.21334e-19	0.0201127	0.0057018	0.00355166	3.66116e-18	0.0348843	0.103219	2.37469e-19	1.22297e-19	0.0633741	1.91233e-17	0.0912375	0.00874169	0.00656154	0.0254126	0.032949	0.00906811	0.00209266	0.098416	1.91741e-18	4.62795e-17	0.00260776	3.31111e-18	0	0.00375722	3.71699e-18	0.060424	1.05515e-17	0.079858	0	0
GSM1249239	0	3.29302e-18	0.152786	0.135798	3.56354e-19	0	1.02907e-17	0.030292	0.00242415	0.0465672	0.0495063	0.0151835	0.0573503	0.100943	1.43811e-20	0	0.0531826	0.0091725	0.000751975	0.0151828	0.00640886	0.0143361	5.71977e-18	0.0202241	0.157847	0	7.14866e-20	0.104134	6.89212e-19	0.190928	0.00814123	0.0103533	0.0233438	0.0387245	0.0392467	0.00339548	0.130523	0	0	0.0133994	0	0.00680182	0.00380314	1.32471e-18	0.0552979	1.28649e-19	0.085331	0.0272203	0
GSM1249240	0	3.45472e-18	0.106282	0.120437	0	0	4.08139e-18	0.0182	4.1439e-20	0.0215866	0.0219392	0	0.0725386	0.107455	0	8.85886e-18	0.0455067	0.00358283	0.0028644	0	0.0085995	0.0401362	6.52676e-19	0.0369608	0.159298	3.28863e-18	1.73264e-19	0.115283	0	0.068605	0.01771	0.0133934	0.0230685	0.0448261	0.0429653	0.00342953	0.104059	0	0	0.0227353	1.92875e-17	0.0184536	0.00419894	0.00153357	0.0310036	9.36114e-18	0.0592349	0.0209712	0
GSM1249281	9.41251e-19	1.42085e-17	2.75886e-18	0.133868	7.40594e-18	1.30819e-17	1.41477e-17	0	1.06232e-17	5.86748e-20	0	0	0.0439434	0.121427	0.0485481	0	0	2.206e-18	0.0137774	0.022995	0.0268707	0.056988	0	0.0999102	0.179	0	0	0.0509911	0.00258399	0.210191	0.0290929	0.0221385	0.0157131	0.0401924	0.0948373	0.00435249	3.6423e-18	0.0045954	0	0.0297264	6.21637e-17	6.13309e-20	0.00379085	0.00937932	0.0075707	0	0.0176059	0.0843845	0
GSM1249282	0	9.40035e-18	0.121701	0.173518	0	0	0	0.0451122	0	0.0433435	0.078486	0.0657771	0.0636083	0.0956293	0	9.40969e-18	0.0788743	2.96029e-19	0.000680723	2.8256e-18	0.00179093	0.0135406	0	2.11166e-18	0.0771609	5.03935e-18	1.7054e-18	0.109562	2.54691e-18	0.113957	0.00242474	0.0116468	0.0167133	0.0254452	0.0120224	0.00293	0.0771658	4.66841e-19	0	0.0108681	0	0	0.00170914	2.10768e-19	0.0918897	0	0.0779021	4.96982e-18	0.0122303
GSM1249283	0	0	0.158954	0.1928	0	1.09131e-19	1.1348e-17	0.0160529	1.11332e-18	0.0260732	0.0284222	2.14247e-19	0.0631293	0.0956422	0.0100302	1.53235e-17	0.0503469	0.00265574	0.00476189	3.75328e-19	0.00117393	0.0252966	0	0.0370921	0.189811	0.000923784	2.92022e-19	0.11826	0.00795431	0.0952821	0.00461857	0.00936829	0.0215298	0.0507924	0.0611758	0.00269759	0.12924	0.000636877	2.07665e-18	0.0218182	0	0.0229817	0.00103759	5.48063e-19	0.0792899	2.36955e-19	0.0744707	0.053598	0
GSM1249284	1.62227e-19	1.66909e-17	0.237804	0.244252	3.64032e-18	1.16645e-18	9.37606e-18	0.0224884	2.91375e-19	0.0547684	0.0658276	0.0158967	0.0681771	0.084421	7.71313e-18	0	0.0610406	0.0018032	0	6.77995e-19	1.51233e-18	0.00178959	0	1.6136e-17	0.115869	0.00131912	0	0.104855	1.79297e-18	0.166985	0	0.00304392	0.0243421	0.0322461	0.01783	0.00231954	0.173773	0	0	0.0153585	0	0	0.00729105	0	0.096457	0.0205932	0.1001	0	0
GSM1249285	2.1441e-18	1.0363e-17	0.188486	0.20805	0	4.79926e-18	1.37722e-17	0.0220589	1.26514e-18	0.0398593	0.0547428	0.0436263	0.0737352	0.0689134	2.80087e-19	1.73262e-17	0.107498	0	2.02447e-20	0	0	0.0202518	0	0	0.0866734	7.24269e-19	1.21656e-18	0.0896325	8.27681e-18	0.134226	0.000493052	0.0180302	0.0227477	0.0373171	0.0204353	0.00260749	0.135304	0	8.11409e-17	0.00679186	1.20675e-17	1.68202e-18	0.00323554	0	0.0555238	3.69841e-17	0.0882397	1.02865e-18	0
GSM1249286	0	3.13762e-18	0.192145	0.151418	0	6.07891e-18	6.64382e-18	0.0448408	0	0.0613739	0.0623685	0.0409601	0.0669934	0.090281	1.09504e-19	0	0.0631114	0.00833138	2.46224e-20	0.0183981	0.00283407	0.00952175	8.33743e-18	0.0187117	0.115778	0	1.91874e-18	0.100929	0	0.120524	0.000496404	0.000860931	0.0202517	0.0337779	0.00506019	0.00298437	0.147883	0	0	0.00513224	2.024e-18	1.54282e-18	0.00555125	5.48294e-18	0.0711409	1.23893e-17	0.100267	0	0.00102739
GSM1249287	8.6896e-19	4.5556e-18	0.0592601	0.2533	1.22367e-19	7.79034e-18	1.49896e-17	0.0359646	2.23616e-18	0.0305667	0.0488357	0.0147898	0.0644901	0.0786458	0.00996397	0	0.0274285	0.0022616	0.00165287	0	0.000631181	0.0369518	0	0.0551311	0.153506	0.000186607	1.03349e-19	0.119887	0.00448343	0.0766289	0	0.00531752	0.0181972	0.0439627	0.0497316	0.00213758	0.0707263	2.82531e-19	8.91632e-18	0.0199707	1.15064e-17	3.27282e-18	0.0031114	5.90888e-19	0.0455799	0	0.0582474	0.0368233	0.001706
GSM1249288	0	2.16107e-18	0.0853507	0.236555	1.646e-18	1.56392e-17	1.66116e-17	0.0157623	7.38455e-18	0.00290488	0.042817	0.0209879	0.0613023	0.113103	0.0028428	0	0.0704545	0	0	0	0.00298003	0.0309392	0	0.0430365	0.113247	0	0	0.0933756	0	0.0371903	0.00652812	0.00984982	0.0179282	0.0437479	0.0367379	0.00422498	0.0748215	1.08604e-18	0	0.0217992	0	0	0.00379718	0	0.0267396	0	0.078132	0.0113559	0.0218552
GSM1249289	3.39847e-20	1.0934e-18	0.119565	0.213974	1.92235e-18	2.44372e-18	0	0.016073	0	0.0221693	0.0306298	0.00586987	0.0421868	0.0882265	0.00408267	0	0.0314455	0.00524752	0	0.00815104	0.00815924	0.016021	0	0.0532971	0.113925	0	0	0.0950489	7.26774e-19	0.104427	0.00637047	0.017485	0.0202861	0.0457262	0.0336294	0.00393625	0.110137	0.00265003	0	0.0128928	5.91587e-19	0.00450066	0.00207055	4.98566e-19	0.0572312	7.86135e-19	0.0704002	0.0196707	0.0194639
GSM1249290	0	1.20307e-17	0.183694	0.214196	0	3.38116e-18	3.69668e-18	0.0303434	0	0.0717522	0.0701169	0.035245	0.0661802	0.0793332	0	1.22356e-17	0.0790925	0.00766774	6.96054e-22	0	9.29227e-05	0.0191515	1.1333e-17	1.70147e-18	0.114812	0	2.05607e-18	0.138655	0	0.157364	2.67554e-20	0	0.0215991	0.0365429	0.00714599	0.00277145	0.14563	2.01709e-18	0	0.0158265	6.67353e-19	6.87517e-18	0.00416446	6.90035e-18	0.0783013	2.1607e-17	0.100033	0	0.0039112
GSM1249291	4.63293e-19	1.2536e-18	0.0377583	0.226092	1.65652e-17	1.19997e-18	0	0.0206824	6.03373e-20	0.0333432	0.0563875	0.0250537	0.0784345	0.107417	0.0312968	0	0.0251557	0.00357552	0	2.98024e-20	0.00671926	0.0428393	4.74374e-18	0.115197	0.173022	0	3.48889e-18	0.128367	7.38574e-19	0.167549	0.00225562	0.01193	0.0196277	0.050086	0.0110818	0.00363073	0.0449151	0	0	0.0292681	0	0.00583255	0.00789691	0	0.0242914	2.43146e-17	0.075865	1.32031e-18	0
GSM1249292	2.88329e-19	4.26944e-19	0.222017	0.167935	0	0	8.84331e-18	0.0192865	2.15691e-18	0.0114745	0.0317254	0.00131611	0.0501203	0.0887789	0.000798712	0	0.0681245	0.00545653	0	0	0.00374811	0.0136606	0	0.0528082	0.118706	2.96775e-19	6.40427e-20	0.0937511	7.4104e-19	0.0988322	0.014592	0.00852848	0.0182212	0.034061	0.0154941	0.00346407	0.162385	0	0	0.0135159	2.5134e-17	0	0.00424089	0	0.0354945	1.16422e-17	0.08347	7.99272e-21	0.0173207
GSM1249293	0	8.67958e-18	0.182319	0.179639	2.98914e-18	0	0	0.0287517	0	0.0469527	0.0373484	0	0.0663066	0.124669	0.0024452	0	0.0997283	0.00553779	1.6295e-19	0	0.00129176	0.0325115	5.77258e-18	0.057127	0.151977	1.33151e-18	0	0.0990213	3.97047e-18	0.0466972	0	0.000421082	0.018584	0.0429477	0.0290289	0.00286484	0.139847	0	0	0.021953	0	2.30995e-19	0.00587069	2.89287e-18	0.0381658	1.43294e-17	0.0962416	0.00961968	0.0487324
GSM1249294	0	1.20217e-17	0.201376	0.119282	4.65877e-19	0.00215633	0	0.0509424	0.0459818	0.119368	0.0589102	0.0108723	0.0805522	0.138921	3.70214e-18	1.51646e-17	0.045788	0.00391274	0	7.87818e-18	0.00172098	0.0102817	0	0.00500039	0.148049	0	0	0.0984329	4.74043e-18	0.118696	0	0	0.0189517	0.0266749	0.00900685	0.00178256	0.149854	0	2.75558e-17	0.010162	7.54489e-18	0	0.00694357	0	0.0579786	0	0.0875956	1.77677e-18	4.35445e-18
GSM1249295	0	0	0.0444296	0.0849931	0	0	0	0.0185655	0	0	0.0105208	0	0.0709359	0.155042	0.0337954	3.91113e-18	0.0386755	0.00471068	0	0.0173305	0.0155789	0.0618782	0	0.0935533	0.247343	8.83782e-19	0	0.0875511	0.0129968	0.0847778	0.00528646	0.00636572	0.0183142	0.0557301	0.0559149	0.00529905	0.0670159	4.63243e-19	0	0.0385435	0	0.0305209	0.0116843	0	3.12306e-19	0	0.066052	0.0659966	0
GSM1249296	7.19498e-19	3.60284e-18	0.196942	0.143612	0	5.55819e-19	0	0.0446523	0.0178565	0.0732201	0.0562395	0.0171239	0.0755324	0.0634445	2.12721e-19	1.95163e-17	0.07477	0.00283943	0	0	0.00140444	0.00809068	1.25488e-17	0.0326912	0.0965127	0	0	0.103593	1.39399e-18	0.108198	0.00306587	0.00416806	0.0183337	0.037597	0.0131775	0.0031779	0.1476	1.93202e-18	6.11524e-18	0.0118466	2.35744e-18	6.45009e-22	0.00568611	6.55971e-20	0.0492099	2.33417e-17	0.0913574	0	0.00813149
GSM1249297	0	3.05354e-18	0.0585366	0.146943	7.38186e-18	6.52083e-18	0	0.00718123	0	0.0257858	0.0262347	0.0139466	0.0728052	0.120905	5.08384e-20	0	0.0269554	0.013712	0	2.33194e-19	0.00682025	0.049475	0	0.0294277	0.187178	0	5.99149e-19	0.143183	0	0.176606	0.0123026	0.00999684	0.0195735	0.0417018	0.0295101	0.00395128	0.0738934	0	1.78238e-17	0.0278068	0	0.0150917	0.00635441	1.1976e-20	0.0317822	4.09981e-18	0.0498887	0.0528979	0.00459048
GSM1249298	0	3.10777e-18	0.0621207	0.190779	9.00547e-18	0	2.14988e-17	0.0213367	0	0.0345883	0.0386542	0.0236357	0.089826	0.0863559	0.029547	1.63279e-18	0.0483139	0	0	0	0.0069168	0.0613459	0	0.0844289	0.166839	1.74947e-19	0	0.0979839	0	0.105993	0.00745805	0.00443514	0.0177546	0.0439155	0.0371771	0.00392973	0.0640854	6.41733e-19	3.08124e-17	0.0358784	0	1.34906e-18	0.00718807	0	0.00995135	1.4614e-17	0.0667827	0.0507048	0.0290162
GSM1249299	5.19952e-20	5.7333e-18	0.14703	0.30483	0	1.11831e-17	5.62829e-18	0.0136177	0	0.00893258	0.0483315	0.0214357	0.0602653	0.083519	0.0222426	0	0.0712039	0.00593576	2.0066e-20	5.40503e-18	7.25094e-21	0.0124977	6.82441e-18	0.0641229	0.0943453	0	9.35414e-19	0.123146	0	0.17409	0.0022946	0.0191044	0.0196636	0.0367513	0.00865347	0.00415066	0.112379	0	0	0.00687942	0	4.15067e-18	0.00128814	3.39197e-18	0.0740549	2.48764e-17	0.0840528	0	0
GSM1249300	1.96474e-18	2.41211e-18	0.0924289	0.189804	4.61593e-19	0	0	0.0362164	1.52356e-18	0.0811402	0.0620097	0.0562191	0.0670707	0.107933	0	1.01967e-17	0.054035	0.0015917	0	0	0	0.0212646	8.14767e-18	0.00713367	0.0891472	1.12621e-18	9.81657e-19	0.105399	1.36396e-17	0.0971406	0.00107656	0.00498679	0.019302	0.0293447	0.0106379	0.00310024	0.0873175	3.86288e-18	0	0.0151884	0	0.00214016	0.00360447	2.97113e-18	0.0480932	8.25675e-18	0.0782918	1.53595e-18	0.0027597
GSM1249301	1.20977e-18	0	0.0364677	0.215786	0	5.87754e-18	1.86273e-17	0	4.51535e-18	2.69483e-19	0.012499	0.00340361	0.0543483	0.0663875	0.00286371	0	0.0131431	9.11361e-19	0.00247951	0	0.00554384	0.00410125	0	0	0.0908008	0.00164028	0	0.054121	0.00358326	0.107211	0.0281945	0.032778	0.0277596	0.0246486	0.0210595	0.00549325	0.0410577	0	2.01462e-19	0.000688043	1.97651e-17	0.0380618	0.00434348	0.0129004	0.0456884	0.00846579	0.0362578	2.97179e-19	0
GSM1249302	0	4.12634e-18	0.115288	0.196718	0	0	1.79069e-17	0.0167657	0	0.0135058	0.0441421	0.0336736	0.0638621	0.124626	0	2.07479e-17	0.076004	0.000454131	0.00192186	0	0.000925054	0.0370023	4.96274e-18	0.032753	0.145996	2.96629e-18	0	0.119274	0	0.149028	0.0092791	0.0151637	0.0245394	0.0441006	0.0442463	0.00345505	0.0979368	0	0	0.0185029	0	9.75998e-19	0.00528334	1.50763e-19	0.0339243	3.78048e-17	0.0833107	0.0114711	4.97764e-18
GSM1249303	0	6.82058e-18	0.214853	0.235008	1.12932e-18	0	5.10785e-18	0.0265409	1.07189e-19	0.0522152	0.0491099	0.00420892	0.0679308	0.0807827	0.00446949	0	0.0600291	0.0038243	0	1.65635e-19	0.00185156	0.0179812	1.11422e-17	0.0717479	0.142619	1.01262e-18	2.79688e-18	0.10771	0	0.123114	1.50397e-18	0	0.0206926	0.0465645	0.0108555	0.00172723	0.16861	4.17622e-18	1.12448e-17	0.0119109	6.90494e-19	7.25046e-18	0.00571529	4.5544e-18	0.0611606	1.65172e-17	0.0853099	6.22182e-18	0
GSM1249304	0	5.02773e-18	0.171384	0.177621	1.68844e-18	1.34706e-18	1.90947e-18	0.00198921	2.09378e-19	0.0510017	0.0364327	0.035187	0.0498149	0.0972894	0	4.57669e-18	0.0398421	0.00995527	0	0	0.000709644	0.0143944	0	0	0.13105	0	8.58322e-19	0.141765	2.4466e-18	0.166178	0.0137139	0.020948	0.0188981	0.0463097	0.0171067	0.00324055	0.151004	0.00677616	1.12858e-17	0.0192921	0	0.0135784	0.00357725	0	0.0829849	0	0.0530353	0	0
GSM1249305	1.06719e-18	8.83413e-18	0.09093	0.183284	0	1.25967e-17	0	0.0212072	2.68414e-18	0.0173541	0.0455763	0.0221743	0.0620039	0.0989179	0.0243823	9.77803e-18	0.0574047	0	0.00294495	8.7858e-19	0.00505652	0.0480978	0	0.108774	0.130954	4.72414e-18	1.58948e-18	0.0993366	0.00907212	0.212763	0.0111804	0.015062	0.0233155	0.0487636	0.0351401	0.00429705	0.0894212	1.91159e-18	4.00314e-18	0.0177008	0	2.02912e-19	0.0037795	1.27194e-19	0.0119671	0	0.0940597	0.00777919	1.46731e-18
GSM1249306	2.57468e-19	2.13261e-18	0.0945797	0.164619	2.11817e-18	2.45844e-17	1.82717e-17	0.0209601	0	0.00552633	0.0415801	0.0248706	0.0610854	0.0784637	1.1412e-19	1.1795e-17	0.07263	0	0.00418997	4.62112e-18	0.00473005	0.00079867	2.75614e-18	0.0198943	0.0886186	6.93548e-19	0	0.0584253	0.00238973	0.114951	0.0216522	0.0268065	0.0290416	0.024249	0.0418127	0.00554205	0.0699828	0	0	0.00194102	7.94125e-19	0.0265222	0.003929	0.00785942	0.0299068	1.74784e-17	0.0858272	0.00413971	8.05172e-20
GSM1249307	6.50835e-19	3.79354e-18	0.210902	0.19716	0	0	0	0.0223763	3.27891e-19	0.0537149	0.0381142	0.0103197	0.0599335	0.0689479	0	1.23477e-18	0.0731487	0.0011755	0	0	0	0.000389513	1.01335e-17	0	0.0633057	9.91463e-20	0	0.0871243	0	0.212888	0.00904125	0.0167345	0.0278662	0.0270867	0.0126993	0.00335936	0.154351	2.00691e-19	5.15225e-19	0.00282395	0	0.0351115	0.00335586	6.8431e-19	0.0640018	2.97952e-18	0.075199	1.04974e-17	0
GSM1249308	2.18316e-18	8.58847e-18	0.188163	0.207044	0	3.9199e-18	6.02295e-18	0.0183755	1.21957e-20	0.0621166	0.0512823	0.0271291	0.0560316	0.0939203	0	0	0.0686095	0.00384987	0	0	0	0.014275	5.57273e-18	6.3718e-18	0.0884291	1.15334e-18	2.56517e-18	0.104457	0	0.140145	6.57871e-20	0.00532838	0.0175161	0.0312206	0.0238715	0.00353442	0.153076	0.000449353	0	0.0113911	0	0.00629567	0.00603576	0	0.0579214	1.75012e-17	0.0891773	0.00330872	0.0034714
GSM1249309	0	6.45512e-18	0.164333	0.261212	4.60817e-19	0	0	0.00145188	0	0.033087	0.0218875	6.19266e-19	0.0488246	0.0599084	0.00181213	8.98143e-18	0.0561848	0.00699001	2.15974e-21	0	1.16608e-19	0.00850573	7.94828e-18	0	0.120755	0	2.7842e-19	0.127961	3.73415e-19	0.133141	0.00303232	0.00562216	0.0186463	0.0426806	0.0296876	0.00202063	0.138469	0	0	0.0129261	4.44685e-17	0	0.00363125	0	0.0724129	8.08163e-19	0.0999011	0.000370844	0.0359087
GSM1249310	6.38109e-19	0	0.125124	0.272721	0	6.11299e-18	6.82254e-18	0.0190001	0	0.0319748	0.0382857	6.40174e-19	0.0615416	0.0711096	0	6.95142e-18	0.05024	0.000663777	0	9.73237e-19	0.0043251	0.00527156	1.97305e-18	0	0.128008	0	8.594e-19	0.0888611	0	0.13979	0.00851058	0.00121952	0.0190848	0.0385947	0.0313627	0.00379027	0.106607	8.72897e-18	0	0.00546388	0	4.32453e-18	0.00364854	0	0.0481236	1.12529e-18	0.0628491	0.0101795	0
GSM1249311	2.71774e-18	3.68943e-18	0.0411477	0.316105	0	7.41416e-18	1.02706e-17	0.0102521	0	0.010818	0.038751	0.0284299	0.0678006	0.100257	0.0203292	3.37108e-17	0.0519971	9.03348e-21	4.7551e-19	1.94237e-18	0.0033396	0.0407561	0	0.0549967	0.0990917	2.6159e-18	0	0.0944231	3.88178e-20	0.232041	0.00704966	0.0153496	0.0262255	0.0383602	0.024364	0.00367711	0.0511202	1.67702e-18	0	0.0120704	0	0.00780984	0.00247187	1.90815e-18	0.0307123	1.67725e-17	0.0579924	0	3.76188e-18
GSM1249312	7.52606e-19	6.90095e-18	0.190046	0.184548	3.90856e-18	3.2774e-18	1.466e-17	0.0210034	2.91034e-19	0.04013	0.0481839	0.00342781	0.0710438	0.0999709	0	0	0.0810873	0.00627005	0	0	0.00235097	0.014185	3.35187e-17	6.37741e-18	0.155234	2.77687e-19	0	0.11011	0	0.0946632	0.00229598	0.00527919	0.024705	0.0298002	0.0339913	0.0032047	0.158221	0.00254824	1.74662e-17	0.0200678	0	0.00808559	0.00545978	0	0.0565001	3.48363e-17	0.0935003	0.00361647	0
GSM1249313	2.27384e-19	8.94369e-18	0.187477	0.219254	1.84324e-18	4.84944e-18	0	0.0363356	1.47985e-18	0.0583233	0.0571492	0.0337677	0.0626528	0.0978666	6.42446e-20	1.18565e-18	0.0628068	0.00443518	0	0	0	0.00700367	0	0.0281178	0.106192	2.79666e-19	0	0.110289	4.08303e-20	0.105435	0	0.00571583	0.0209307	0.0409872	0.0270929	0.00321849	0.146935	0	3.65099e-18	0.00206781	1.17993e-19	0	0.00347158	3.04329e-18	0.0619069	0	0.0979927	0.0105646	0.0125869
GSM1249314	0	2.41071e-18	0.156407	0.107833	9.55898e-18	1.10143e-17	3.16641e-19	0.047623	0	0.0629391	0.0680025	0.0425727	0.0723212	0.0890152	2.03433e-21	0	0.0624167	0.00771374	0	5.25801e-19	0.0014298	0.0137283	0	0.0278492	0.155203	0	0	0.141332	1.77196e-18	0.143667	0.0098637	0.0193685	0.0170218	0.0256137	0.0193742	0.00414918	0.12148	3.31056e-18	0	0.00985601	0	0	0.00342904	0	0.0662397	7.48458e-18	0.0996497	0	3.61837e-19
GSM1249315	3.36468e-19	3.21923e-18	0.160291	0.235414	0	3.06916e-18	7.66718e-18	0.028333	2.32569e-18	0.0176653	0.0267546	4.35787e-19	0.0696422	0.118333	6.24441e-21	0	0.0579244	0.0105003	0	2.79531e-20	0.00413791	0.0147769	0	0.0753027	0.155536	1.05931e-18	1.95364e-18	0.111438	0	0.123043	0.0147267	0.027395	0.023455	0.0379213	0.027455	0.00385521	0.135616	0.00961459	0	0.0201074	1.9943e-18	0.0154527	0.00701674	3.89326e-19	0.0527611	0	0.0979801	0	8.34491e-19
GSM1249316	0	3.74256e-18	0.106926	0.220226	0	4.7438e-18	1.62585e-17	0.028824	0	0.0683887	0.0631996	0.0594441	0.0600682	0.0723177	0.00599776	0	0.073406	0.00180443	0	0	0.0002403	0.00709948	0	0.0376378	0.0709705	0	1.28003e-18	0.119146	1.17979e-18	0.148469	0.00223361	0.00190309	0.0252324	0.0452641	0.0205053	0.00368329	0.0862161	0.00118896	9.17103e-18	0.00805136	1.17674e-19	2.73894e-19	0.00286626	1.06166e-18	0.0738891	0	0.0787167	0.00149691	0
GSM1249317	6.2916e-19	4.10102e-18	0.138221	0.229114	3.84235e-18	1.23781e-17	0	0.0126585	0	0	0.0147362	0	0.0650653	0.10615	3.54237e-19	0	0.0638021	0.00301561	0.000366589	3.62264e-19	0	0.0308467	0	9.62436e-18	0.153323	5.42458e-20	2.12355e-18	0.086904	0	0.116629	0.00780042	0.0113512	0.0202504	0.0367922	0.0404754	0.00454357	0.120093	0.00465691	0	0.0218303	6.44006e-18	0.00613223	0.00526474	0	0.0217301	1.12518e-18	0.0861856	0.0219028	0
GSM1249318	0	0	0	0.167372	0	0	1.23496e-17	0.00597335	2.96606e-18	2.74118e-21	0.0192368	0.00288113	0.0751276	0.153648	0.00445563	4.50109e-18	0.0211563	0.00312118	0	0.00161678	0.0100781	0.0548596	0	0.0160006	0.224726	0	0	0.101805	0	0.0744216	0.00662549	0.007967	0.019099	0.043	0.021718	0.00467869	0.032479	1.91227e-18	0	0.0371969	0	0.0591918	0.0114805	3.44548e-19	0.016655	4.4189e-18	0.0554994	0.0165128	0.0196867
GSM1249319	8.91258e-19	1.89567e-17	0.0904674	0.150972	0	0	0	0.0448727	0.000155667	0.0932086	0.0641971	0.0476374	0.0760656	0.101334	0	1.81518e-17	0.0324588	0.000817995	0	0	0.000988226	0.0234826	0	5.88352e-18	0.148356	1.12899e-19	0	0.130143	0	0.165842	3.50282e-20	0.00100709	0.0156766	0.0314436	0.0218133	0.00289311	0.086678	0	2.71933e-18	0.0212557	0	0	0.0023289	2.30817e-18	0.0668393	2.02504e-17	0.0765343	0.00557108	0
GSM1249320	0	0	0.0468869	0.152373	7.81095e-19	3.35529e-18	2.63731e-18	0.0178957	2.27763e-19	0.0298763	0.0414704	2.4147e-19	0.0636422	0.0848954	7.84552e-05	0	0.0294437	0.00566829	0.00727137	0	0.00655393	0.0114701	0	0.0410079	0.184806	0.00157155	2.43374e-19	0.111934	0	0.135131	0.0250593	0.0179173	0.0270267	0.0405399	0.0516688	0.00326013	0.0555921	0.00233626	0	0.0179683	7.70277e-18	0.029249	0.00117368	0	0.0690736	0.0137146	0.0689266	0.0606074	0
GSM1249321	0	8.06142e-18	0.24863	0.151823	0	0	0	0.0359053	0	0.0703542	0.0506246	0.0234274	0.0729569	0.0825135	0	5.50202e-18	0.0790283	0.00647034	0	3.74546e-19	0.00282577	0.00822221	1.19674e-17	0.0115386	0.133674	0	3.33751e-19	0.135131	0	0.150591	0.000563279	0.00213138	0.0202008	0.0452438	0.0246421	0.00229194	0.186799	0	3.98642e-17	0.00723177	8.03577e-18	0	0.00463103	0	0.046505	0	0.096484	0.00455503	0
GSM1249322	0	5.64375e-18	0.148748	0.133226	5.34579e-18	0	0	0.0323064	6.15554e-19	0.0454669	0.0490711	0.014084	0.0652665	0.0992033	0	9.97316e-18	0.0625997	0.00282334	0.00345118	2.83446e-19	0.00630924	0.0105731	1.04075e-17	6.00072e-20	0.128414	3.46029e-19	0	0.0952841	2.58083e-18	0.148711	0.0177195	0.0186524	0.0215709	0.0278543	0.0261409	0.00491194	0.110951	0	0	0.00481267	6.87327e-18	0	0.00147747	0.000241311	0.071861	2.81456e-17	0.0860773	3.68369e-19	0
GSM1249323	0	9.30609e-18	0.211178	0.135588	0	0.0047311	3.98265e-19	0.0461141	0.0172999	0.073014	0.0583238	0.00713031	0.0773018	0.0940314	0	1.19143e-17	0.0874824	0.00302062	0	0	0.00663811	0.00655232	8.54233e-18	0.020731	0.112057	1.7093e-19	0	0.112231	1.02935e-17	0.0890826	5.78877e-19	0	0.0210973	0.0370991	0.0162815	0.00277601	0.156795	2.15669e-18	0	0.00635505	6.86135e-18	0	0.00476054	0	0.0617179	2.97583e-17	0.104047	4.63448e-19	0.0186567
GSM1249324	3.11224e-20	3.87713e-18	0.12395	0.239203	1.64667e-17	0	1.78987e-17	0.0163896	1.42106e-18	0.0115151	0.0414078	0.0331	0.0720289	0.0910114	0.0145691	9.26814e-18	0.0846428	2.16343e-20	6.59964e-19	2.10818e-19	0.00519576	0.029074	0	0.0148577	0.0819239	5.4373e-19	0	0.0900834	0.00431549	0.149912	0.00721928	0.0181012	0.0204615	0.0433976	0.0204561	0.00441881	0.0984788	0.0110171	1.90109e-17	0.00903626	0	0	0.00122757	0	0.0428367	2.22189e-18	0.0831469	1.62986e-18	0.00364733
GSM981627	0	3.61845e-18	0.197709	0.0839102	4.59727e-18	0	3.94894e-18	0.015309	0	0.0362618	0.0401016	0.0201399	0.0464426	0.0789074	1.1048e-19	7.09177e-18	0.106607	0.00625265	0	0	0.00622167	0.0229533	0	0.00228534	0.152739	9.68508e-19	0	0.113709	0	0.123262	0.00670741	0.00707267	0.0203986	0.0400724	0.0314913	0.00355484	0.152582	0.00223229	3.52986e-18	0.0167732	1.11215e-17	0.00894571	0.00560474	1.77913e-19	0.0594213	0	0.0928174	0.0343587	0
GSM981628	0	1.07023e-18	0.097882	0.128981	1.69603e-18	0	6.1856e-18	0.0144021	1.07437e-18	0.00126968	0.0159335	6.6147e-18	0.0488208	0.0696055	0.00775656	9.79469e-18	0.0438892	0.00601866	0.000909845	0	0.00632736	0.0264498	1.67675e-18	0.0239763	0.187584	2.95132e-19	1.89442e-19	0.0996004	0	0.118457	0.0293162	0.0258959	0.0199268	0.0389166	0.0475161	0.00362466	0.0909065	0	1.21258e-18	0.0134038	2.18489e-17	0.00961735	0.00252674	0.00612409	0.0720696	6.27953e-18	0.0707686	0.0314734	2.77363e-18
GSM981629	0	2.09516e-18	0.198856	0.140425	0	0	5.64382e-19	0.0309605	0.00463495	0.0400111	0.0511362	0.0105139	0.0451956	0.0551718	0.00311019	1.81659e-18	0.0702582	0.00670166	0.00123284	1.60871e-19	2.60902e-05	0.0132982	0	0.00814614	0.162421	0	3.97913e-19	0.135787	0	0.122085	0.00108941	0.00294155	0.019351	0.0468652	0.045796	0.00302853	0.162226	0	3.27815e-18	0.00640976	5.75715e-18	0.0160017	0.00722383	0	0.0659258	2.5223e-17	0.0830217	0.0272591	0.000608237
GSM981630	0	2.96674e-18	0.139035	0.184391	0	0	0	0.0192532	0	4.02172e-20	0.0101709	0	0.0503523	0.0655662	0.000743536	0	0.0945776	0.000572262	0	0	0.0112479	0.00562213	2.74669e-17	0.0370551	0.0936257	3.01145e-19	3.33449e-20	0.078579	0	0.10364	0.0130698	0.00952438	0.0222251	0.0267927	0.0173754	0.00510365	0.0989773	0	1.45116e-17	0.000338931	1.23636e-17	0.0185075	0.00523255	0.0122777	0.0462164	5.99258e-18	0.123993	1.31293e-18	0.0259931
GSM981631	9.1747e-19	0	0.0932794	0.140625	0	2.70821e-20	3.18768e-19	0.0103661	1.89618e-18	0.00803323	0.0181004	0	0.0443094	0.0633591	0.00469096	0	0.0430878	0.000176696	0.00424711	0.00127894	0.0198828	0.0079085	1.42857e-17	0.0254344	0.16865	0.00218497	0	0.0899194	3.24532e-18	0.103066	0.0289974	0.0161522	0.0263442	0.0374869	0.0675827	0.00412463	0.0799146	5.73055e-19	2.10045e-18	0	6.07402e-18	0.0555891	0.00196454	0.0168722	0.0867428	0.00670954	0.0597224	0.0292556	1.13914e-17
GSM981632	0	8.87526e-18	0.202725	0.163438	6.67827e-21	0.00671905	3.77501e-18	0.0421667	0.0137574	0.0685895	0.0564338	0.0169515	0.0578874	0.122914	0	1.18225e-17	0.0635518	0.00354752	4.28398e-19	6.61433e-19	0	0.00747331	1.15979e-18	0.00326628	0.160425	0	9.88175e-19	0.137896	0	0.146829	9.90948e-19	0.00306776	0.017141	0.0431884	0.0265049	0.00253329	0.161147	0	0	0.00945764	2.08456e-18	1.05006e-18	0.0102447	3.92384e-18	0.0721788	2.51213e-17	0.0815117	1.38556e-20	0.0220511
GSM981633	0	8.23679e-18	0.0917649	0.143046	2.17823e-18	0	0	0.0437445	0.00284142	0.0815641	0.0552174	0.0320931	0.0454972	0.110474	0	9.34638e-18	0.0408937	0.00343876	4.18794e-19	6.88534e-19	0.00560479	0.00980196	0	0.0202395	0.124591	0	0	0.111015	0	0.110704	0.010515	0.00893854	0.0217077	0.0333576	0.0160922	0.00260145	0.086645	0	3.50674e-17	0.00617203	7.4275e-18	0	0.00584722	0	0.0719507	2.13167e-17	0.0854669	1.21533e-19	1.15438e-18
GSM981634	0	0	0.0945651	0.103516	3.29328e-18	6.10422e-20	0.0012207	0.0274728	0.00233254	0.0325773	0.0367948	0.0183367	0.0581107	0.0739033	0.00728013	2.91386e-18	0.0380996	0.00764885	0.00853407	0.00336702	0.00211444	0.0187373	2.35577e-19	0.0132038	0.155093	0	3.36638e-19	0.126539	6.19892e-20	0.128084	0.0157041	0.016983	0.0183021	0.0338898	0.0512887	0.00377609	0.0817244	0	0	0.00529907	4.08134e-18	0.0361859	0.00250706	0.000829815	0.0655701	0	0.0944522	0.0637865	7.68823e-19
GSM981635	1.75515e-19	6.28114e-18	0.0761674	0.127694	3.38864e-18	1.80586e-18	9.94419e-18	0.0116443	0	3.0198e-18	0	0	0.0572283	0.0930892	0.0131247	0	0.033481	0.00275899	0.0126234	0.00139771	0.0100902	0.0415464	3.37647e-17	0.0193255	0.228009	3.26663e-18	0	0.0748169	0	0.169325	0.0341121	0.00574053	0.0173347	0.0398343	0.0584164	0.00458231	0.0732339	2.14047e-18	3.20004e-20	0.0138872	2.14869e-17	0.0373594	0.00532147	0.0180907	0.0188555	0	0.0576885	0.0308091	1.98312e-17
GSM981636	1.56228e-18	4.9605e-18	0.132005	0.120945	3.73779e-18	0	2.27999e-17	0.0204535	0	0.00791005	0.0254202	0	0.0699134	0.0782392	0.0310905	8.09152e-18	0.0494421	0.00720487	1.69584e-22	0.00926944	0.00538454	0.041385	7.9463e-18	0.104006	0.199617	1.2246e-18	3.04823e-19	0.11081	0.00785861	0.198534	0.0225882	0.0257686	0.0212592	0.0573517	0.0408413	0.00318509	0.121491	0.00307644	1.96277e-17	0.0260463	3.71677e-19	0.0378306	0.00809726	0	0.0373082	1.07678e-17	0.0759453	0.0174729	4.13763e-18
GSM981637	0	0	0.0665444	0.129363	0	7.74956e-18	0	0.00982167	4.93802e-19	0	0.0165483	0	0.0364819	0.0561057	0.0224259	0	0.0351894	0.000926697	0.00492055	0.00977068	0.0152503	0.00731035	2.61427e-17	0.0367435	0.13118	0.00117274	8.99467e-19	0.0817623	0.00354791	0.116148	0.0377275	0.0269234	0.0308641	0.0331265	0.0415574	0.00449715	0.0678737	0.00055644	0.00218407	0.00767791	1.62859e-17	0.0418054	0.00122618	0.0137034	0.0757056	4.33681e-19	0.0768417	0.0129935	3.8505e-18
GSM981638	4.75196e-19	6.98638e-18	0.195854	0.212459	0	5.02044e-19	1.62245e-17	0.0318443	6.34474e-19	0.0338503	0.0553244	0.040826	0.062176	0.0840319	3.15937e-19	0	0.0668097	0.000815021	0.00126066	1.03867e-17	0.00235276	0.0177173	0	0	0.128591	3.5597e-19	0	0.147592	7.28285e-18	0.124564	0	0.00710655	0.0136547	0.0379398	0.0339306	0.00307479	0.153764	0	3.06742e-17	0.00887792	1.04185e-17	0	0.00633297	1.15804e-18	0.0824893	2.997e-17	0.115359	8.00788e-05	0
GSM981639	3.65645e-19	1.03859e-18	0.14463	0.145459	0	5.6502e-18	8.12383e-18	0.0237948	1.64838e-18	0	0.02143	1.07474e-19	0.0612297	0.0807394	0.006857	1.28907e-17	0.0509937	0.00176358	0.00111161	0	0.0104234	0.0134521	4.45131e-17	0.0375969	0.181545	0	0	0.0821658	0	0.147882	0.0262987	0.0157681	0.0207807	0.0300797	0.0427083	0.00358186	0.116937	1.48575e-18	3.54644e-18	0.00848983	1.84063e-17	0.0226836	0.00288323	0.0124991	0.0419769	5.14473e-18	0.0720235	0.0192146	5.45264e-17
GSM981640	0	3.95721e-18	0.0243426	0.161813	2.86076e-18	0	2.95925e-17	0.0124208	5.25793e-18	0	0	0	0.0538887	0.0661156	0.0218786	1.41252e-17	0.0140246	0	0.00751645	0.0105245	0.0124308	0.0209101	0	0.0748501	0.176566	0	0	0.107556	0.0123015	0.0922528	0.0320994	0.0165777	0.0217268	0.0457733	0.0598613	0.00377955	0.0344414	4.51506e-19	0	0.00286928	6.44847e-18	0.038172	0.0012212	0.0116707	0.0746757	2.06771e-17	0.0646996	0.0396266	5.01424e-19
GSM981641	0	4.8021e-18	0.167825	0.199037	0	4.72763e-18	2.52984e-18	0.0293121	9.25522e-19	0.038211	0.0458608	0.0306445	0.0627593	0.0994161	0.0148231	0	0.0610926	0.00311464	0	0	0	0.0328885	1.09277e-18	0.0598977	0.165274	0	1.23262e-18	0.129688	9.96903e-19	0.107644	0.00484443	0.00729771	0.0161811	0.0552795	0.018129	0.00407258	0.144635	6.05208e-05	2.29884e-17	0.0254805	6.4766e-18	0	0.0100144	0	0.0611951	2.74542e-18	0.0705589	1.27113e-18	0
GSM981642	2.52412e-19	5.6958e-18	0.184392	0.16999	0	8.04166e-18	4.21196e-18	0.0310261	0	0.0390655	0.0503729	0.0276271	0.0465658	0.0745194	2.49088e-19	0	0.0587593	0.00149689	0.00581651	0	0.000314877	0.000536563	5.5395e-18	0.0136232	0.108228	1.4665e-19	9.90564e-19	0.0885531	0	0.1167	0.0118988	0.0111194	0.0255075	0.0342163	0.0433449	0.00338715	0.144007	0	0	0.00321957	1.2584e-17	1.39624e-18	0.00627611	0	0.0890662	1.55058e-17	0.100273	0.0231518	0.0133736
GSM981643	0	4.83654e-18	0.147694	0.1537	2.45813e-18	0.00416277	1.84129e-18	0.0347936	0.0106999	0.044404	0.0495613	0.0229292	0.0532569	0.0765663	0.00645294	4.95231e-18	0.0320666	0.00750378	0	0.00806215	0.00671582	0.00728598	4.62039e-18	0.0220209	0.141864	0	0	0.118487	0	0.17132	0.0114687	0.0139017	0.0182697	0.0386477	0.0253538	0.00230358	0.129916	0	7.89026e-20	0.00360663	0	0.0222687	0.00512173	0	0.0734381	0	0.0738756	0.0021948	1.87367e-18
GSM981644	0	1.51736e-17	0.0530085	0.113755	6.58485e-19	4.64136e-19	2.69642e-17	0.0183647	6.64421e-21	0.0188316	0.029609	0.000189456	0.0658621	0.113656	0.0119486	4.67582e-18	0	0.00982522	0	0.0212933	0.0117561	0.0239356	0	0.0420993	0.214584	3.30009e-19	0	0.105863	0	0.116127	0.0282475	0.0208851	0.0233343	0.0439586	0.027021	0.003543	0.0646191	5.02781e-19	0	0.0213817	0	0.04032	0.00457308	2.71051e-20	0.0570619	2.86356e-17	0.0520673	0.0158147	6.59648e-18
GSM981645	0	1.08379e-17	0.107131	0.117343	0	1.2658e-18	0	0.000908802	2.22829e-18	7.47186e-18	2.09824e-19	4.21421e-18	0.0325914	0.0714093	0.0072849	3.71843e-18	0.0517695	0.000517902	0.0121816	1.28688e-19	0.00635168	0.0118344	0	0.00974152	0.153653	1.23474e-19	3.73476e-19	0.0783259	0.00661836	0.0867253	0.0404002	0.0236252	0.0225538	0.0319345	0.0724912	0.00418774	0.0908826	1.60596e-18	0	0.00108484	2.75791e-17	0.0251888	0.00421408	0.0162489	0.0856484	0	0.084108	0.0167942	0
GSM981646	2.28826e-19	3.63372e-19	0.0350883	0.174869	4.33468e-18	0	0	0.0137766	0	0.00225741	0.0133044	0	0.0389126	0.0494197	0.0313559	0	0.00376214	1.958e-22	0.00280695	0.0050521	0.00701872	0.0122793	0	0.0809311	0.142775	0.000165118	1.41714e-19	0.087176	0.0101458	0.183279	0.0373673	0.0410378	0.0226603	0.0410136	0.0497162	0.00414145	0.0450703	0.00130576	1.09564e-18	0.00149539	9.62547e-18	0.0377532	0.000758454	0.00725943	0.0634387	9.31112e-20	0.0627992	0.031761	0
GSM981647	0	4.68687e-18	0.0854927	0.20495	0	0	3.75831e-18	0.0317527	0	0.0394983	0.0474696	0.0417102	0.0575382	0.0722012	0	0	0.0336273	0.000912489	0.00281559	2.93499e-18	0.00241186	0.0292962	7.05986e-18	0.0248687	0.168742	4.89895e-19	6.87476e-19	0.121554	4.10597e-19	0.142896	0.0215457	0.0118575	0.02012	0.0348604	0.0410596	0.00221685	0.0853817	1.34681e-18	1.84619e-17	0.0137375	0	0	0.00219083	0	0.0603578	1.01914e-17	0.064279	0.0106386	1.12385e-17
GSM981648	1.31661e-18	1.85102e-18	0.14358	0.177216	7.35124e-18	5.29435e-19	4.81421e-19	0.00370349	0	0	0.0170716	0	0.0336373	0.0515724	0.0542484	4.40453e-19	0.0594438	0	0.00033324	0.0268904	0.0219939	0.0137098	0	0.096172	0.149636	0	1.64763e-20	0.06872	0.0260639	0.234579	0.0159362	0.0099997	0.0175839	0.0404791	0.0260705	0.00342546	0.127275	0	1.25875e-18	0.0186717	2.95326e-17	0.00195023	0.00544192	0.00888372	0.0317384	0	0.0592198	1.40555e-20	1.51268e-18
GSM981649	0	3.07209e-18	0.0192084	0.0933281	0	8.85969e-18	0	0	1.18852e-18	0	0	0	0.0303376	0.0487663	0.0122602	0	0.0140275	0.00131932	0.00849263	0	0.0126417	0.0151547	7.43216e-18	0.0368571	0.182276	0.00304882	1.94966e-20	0.093787	0.0065714	0.118478	0.0462949	0.039622	0.0192807	0.0324298	0.0572466	0.00499939	0.0436806	0.00534453	0.00775403	0.00991623	4.36579e-17	0.0573126	0.0016169	0.0167451	0.096927	0.00937975	0.047316	0.0222181	2.61098e-17
GSM981650	0	1.62409e-18	0.284852	0.115827	0	3.30351e-18	9.9086e-18	0.0192554	0	0.0212437	0.0406294	0.0277265	0.0430549	0.0634614	0.000325535	6.26883e-18	0.0635249	0.00396475	0.00186015	0	0.0029617	0.00638247	5.18661e-18	0.0151434	0.138418	0	1.54121e-19	0.118978	4.44454e-19	0.135608	0.0122911	0.0207188	0.0179939	0.0457199	0.0338662	0.00293473	0.203915	0.00179123	1.92317e-17	0.0092784	1.63922e-17	0.00311711	0.00596855	6.98269e-20	0.0780888	0	0.0880116	0.00812366	0.00456212
GSM981651	0	3.59955e-18	0.249264	0.101794	0	1.06734e-19	4.07219e-18	0.0434973	6.87261e-20	0.0605677	0.0599497	0.0165456	0.0672296	0.0814997	9.66781e-19	1.32252e-18	0.0577808	0.00182303	3.23055e-19	0	0.00755072	0.0115973	6.8275e-18	0.0214185	0.147126	1.2984e-19	0	0.107226	3.75983e-18	0.134668	0.00850549	0.0069393	0.0196633	0.0303619	0.0301364	0.00270767	0.179615	2.56737e-19	1.70954e-17	0.00674874	8.15372e-18	0.000102143	0.0079595	2.12747e-20	0.0788005	2.34265e-18	0.094035	0	3.75974e-19
GSM981652	1.17748e-19	2.39051e-18	0.0237759	0.0822441	0	1.7537e-18	4.78003e-18	0.00335842	9.04477e-19	0	0.0112539	0	0.0255026	0.0535802	0.00731342	0	0.0155362	0.000779184	0.017638	2.81544e-22	0.0216164	0.0100687	2.24933e-20	0.0123478	0.183398	0.00245118	3.26485e-21	0.0664416	0.0125089	0.0784328	0.0332469	0.0249662	0.016955	0.0332306	0.0881191	0.00378113	0.0377908	0	0	0.00875118	0	0.0437842	0.000389624	0.0152342	0.0687879	0.031341	0.0409719	0.0729184	0
GSM981653	0	8.34699e-18	0.173473	0.141744	6.91589e-18	0	0	0.0269932	8.56397e-20	0.0326586	0.0341778	0.0175646	0.035283	0.0473498	2.81929e-18	0	0.0652713	3.1104e-20	0.00964452	8.22904e-19	0.00353252	0.000924323	6.11048e-18	1.19097e-18	0.141357	0.000878853	0	0.100385	2.09587e-19	0.15177	0.0110606	0.00836	0.0104541	0.0275465	0.0719686	0.00211029	0.135839	1.77443e-18	0	0.000292358	1.02046e-17	0	0.00415118	0	0.0851372	0	0.103403	0.0545045	7.10073e-20
GSM981654	0	5.13994e-18	0.0902993	0.182989	0	0.0103905	1.27684e-18	0.0228491	0.0115892	0.0625559	0.0502858	0.0199947	0.0406497	0.0427238	0.0356909	3.25295e-18	0.0231018	0	0	0.00326525	0.00638583	0.0204476	1.90765e-17	0.0646808	0.13153	0	0	0.113616	0.0253947	0.20059	0.00537842	0.0127712	0.017248	0.0499023	0.0376114	0.00171833	0.0796277	0.00775144	3.64915e-18	0.00394722	0	0.00523955	0.00212319	1.1451e-18	0.0612842	0	0.0626462	0.0294891	0
GSM981655	2.1214e-20	3.57213e-18	0.131334	0.104128	1.41472e-18	0	1.08796e-17	0.0308691	0	0.0345723	0.0415768	0.00723097	0.0700009	0.0683965	0.000832699	0	0.00977207	2.63432e-05	0.00362376	2.05799e-18	0.00921781	0.027493	7.78385e-18	0.0115981	0.182194	2.09371e-18	0	0.0981389	0	0.131996	0.0200513	0.0147236	0.0168191	0.0364348	0.0551696	0.00207089	0.105508	0	0	0.0213277	0	0.0269214	0.00390273	0	0.0525141	3.88006e-17	0.0650307	0.0508266	0
GSM981656	0	2.41565e-18	0.0143371	0.177689	0	7.84498e-19	1.22192e-17	0.0130306	0	3.0505e-19	0.0128993	1.84968e-18	0.046159	0.0667927	0.0191577	9.75696e-18	0.00375982	0	0.00909974	0.0142554	0.0175775	0.00948431	0	0.103244	0.160068	0.000789774	9.99006e-19	0.0860372	0.00813646	0.105212	0.0365107	0.0252685	0.0254527	0.0381577	0.0575059	0.00432391	0.027346	0	0	0.0024363	2.63884e-17	0.0386993	0.00127686	0.0104514	0.0832516	0.0324193	0.0445207	0.0348168	0
GSM981657	0	4.43651e-18	0.167263	0.152168	5.46317e-18	1.13166e-18	4.49752e-18	0.0289992	0	0.0368204	0.0445776	0.0304183	0.0407203	0.041252	0.00654776	0	0.0538626	9.04858e-05	4.91001e-19	4.87958e-19	0.00253282	0.0128114	1.17864e-17	0	0.128868	0	7.4307e-19	0.115651	5.15132e-19	0.16252	0.00373818	0.00800832	0.0174178	0.0402028	0.0368263	0.00299134	0.139725	0.00393358	0	0.00713095	0	0.00693989	0.00470447	3.00397e-19	0.0780974	1.97204e-18	0.0927975	0.0138477	0
GSM981658	0	1.51426e-18	0.0827342	0.0991134	0	6.71355e-19	1.03772e-17	0.0171869	8.60208e-19	0.018838	0.0367916	0	0.0481537	0.117652	0.00434097	2.44647e-18	0.0232867	0.0048233	0.00468785	0.0132447	0.00621976	0.0116646	0	0.0346522	0.17703	0	0	0.105781	0	0.166866	0.0186644	0.0210213	0.0185968	0.0408072	0.045768	0.00282592	0.0717103	2.93062e-19	4.38382e-18	0.0103644	1.94426e-17	0.0151961	0.00304974	0.00218761	0.0667275	0.00315501	0.0808803	0.0429603	0
GSM981659	0	3.45252e-18	0.150608	0.135074	0	0.0168587	0	0.0469615	0	0.0764033	0.0704187	0.0265891	0.0520836	0.0761192	0.00550568	0	0.0242464	0.00525081	3.16339e-19	0.011389	0.00810607	0.0109455	3.72637e-17	0.0371588	0.148454	9.86901e-20	0	0.124782	1.27458e-18	0.147347	0.0067356	0.00741724	0.0204176	0.046467	0.0198054	0.00199691	0.116502	0	4.34694e-18	0.016015	4.09271e-17	3.97751e-19	0.00453698	0	0.102185	0	0.07521	0.00459361	0
GSM981660	0	2.69791e-18	0.116549	0.154791	0	8.0561e-18	1.39974e-17	0.0035951	1.328e-18	4.94272e-19	0.0200512	0.0104549	0.0516882	0.0629338	0.00971226	0	0.0337556	0.00196226	0.0110904	0	0.00660522	0.0151037	0	0.0185437	0.181414	0.00230001	0	0.0995594	0	0.118243	0.0245808	0.019897	0.019921	0.04204	0.0599825	0.00407123	0.0993684	0	0	0.00956063	8.17617e-18	0.0432734	0.00121898	0.00822998	0.0801526	0.0166366	0.0673056	0.0281161	1.06836e-18
GSM981661	0	4.26537e-18	0.0746956	0.136644	0	0	5.91476e-18	3.57292e-20	0	4.84441e-19	0	2.37467e-17	0.0432192	0.05118	0.0338512	0	0.0440972	1.35525e-20	0.00756956	0.0105988	0.0182657	0.0180992	0	0.0552691	0.207501	2.32476e-20	4.23104e-20	0.0626251	0.00404519	0.196441	0.0220381	0.0188794	0.0168624	0.0402406	0.045043	0.00513183	0.0693883	0	1.41311e-17	0.0096969	6.87838e-17	0.0435303	0.00511578	0.0140976	0.0591508	0.0111085	0.0862314	0.0299805	1.67854e-17
GSM981662	2.53841e-19	1.20515e-18	0.177744	0.201702	1.2536e-19	0	7.22039e-18	0.01882	0	0.0152481	0.0283413	0.00755685	0.0551364	0.0574752	0.0132231	1.62187e-18	0.0466275	0.00521766	0	0.0075914	0.00610237	0.0149617	4.65733e-18	0.0446283	0.111743	1.54162e-19	0	0.114992	0.00188775	0.0636872	0.0120816	0.0130819	0.0164459	0.0469573	0.0346502	0.00239152	0.144233	0.00558035	0	0.00669466	0	0.0294685	0.00561187	7.21189e-06	0.0787344	0	0.0770588	0.00960535	0
GSM981663	0	3.27254e-18	0.0799517	0.143611	4.59227e-18	0	2.6289e-18	0.0225876	1.69983e-18	0.0255686	0.034103	0	0.0475291	0.0857253	0.0251371	0	0.0383411	0.000540738	0.00349951	0.0154418	0.0128045	0.0447561	4.49108e-18	0.0706124	0.173874	0	0	0.0913547	0.0259489	0.0942931	0.01373	0.00643406	0.0148353	0.0471461	0.068576	0.00240236	0.0759456	0	0	0.0150293	0	2.14189e-18	0.0020025	0	0.0463151	5.74336e-18	0.0661569	0.0629058	0
GSM981664	0	3.73006e-19	0.0814198	0.145622	1.06259e-17	0	0	0.0104028	6.46807e-20	0.042899	0.0364978	0.0215743	0.0437431	0.0594783	3.24036e-19	2.47328e-18	0.025686	0.00235182	0	0	0.00507574	0.00364907	1.37626e-17	0.0240602	0.128929	2.05981e-19	0	0.0917245	1.05032e-18	0.108497	0.030385	0.022289	0.0204079	0.0388403	0.0231001	0.00255443	0.0711562	1.21513e-18	0	0.00389203	0	0.0252972	0.00259886	0.00344724	0.0787151	0	0.0629034	0.000472478	5.84867e-18
GSM981665	2.01661e-18	1.05396e-17	0.0374541	0.149679	4.91035e-18	0.000503214	0.00433924	0.0306126	0.0059605	0.0840129	0.0786915	0.0733176	0.0273033	0.0695825	0.00969355	8.55273e-18	0.0110546	0.00569597	8.67235e-21	0	0.00131157	0.00882952	5.8544e-18	2.71365e-18	0.119328	3.60861e-18	0	0.137843	1.81596e-19	0.170551	0.00175086	0.0123708	0.0178812	0.0419184	0.0110831	0.00277565	0.0466692	0	0	0.0051428	3.68282e-18	1.3927e-19	0.00166227	0	0.0939467	1.37839e-17	0.0563819	1.77924e-18	0.00468515
GSM981666	6.84756e-19	4.94186e-18	0.0661157	0.10508	8.70461e-19	1.95182e-18	1.81611e-17	0.0056047	0	2.47333e-19	0.0107237	5.57131e-19	0.0386162	0.0794567	0.0234451	0	0.019575	0	0.0142909	8.4642e-19	0.00556307	0.0284306	0	0.0333607	0.182402	0	0	0.0875619	0.0177409	0.0797765	0.0308273	0.0257799	0.0134234	0.0355081	0.093468	0.00319606	0.0767504	5.82814e-19	0	0.0119662	2.80365e-18	0.0162409	0.00170508	0.00782269	0.060959	0	0.0541325	0.0922324	0
GSM981667	1.23925e-20	2.6697e-17	0.0896897	0.15287	2.49436e-18	0	1.70867e-17	0	7.34377e-19	0	0	0	0.0337402	0.0318843	0.0332855	6.88097e-18	0.0146902	0.00629999	0.0383352	0.00509282	0.0367417	0.0107157	0	0	0.160105	0.00327901	0.00160283	0.106507	0.0180698	0.394112	0.0411167	0.0468394	0.0210704	0.0264334	0.10177	0.00314689	0.104401	0.00790817	1.01374e-18	0.0134951	0	0.14908	0.0058695	0.00980034	0.0272883	0.0356336	0.0472946	0.0752353	0
GSM981668	0	0	0.0409482	0.151644	8.00233e-18	0	8.51508e-18	0.0129586	6.14337e-20	0.0320116	0.0472138	0.0252058	0.02699	0.0695136	0.0255699	1.35909e-19	0.00983628	0.0046282	0.00503816	0.0102525	0.0041859	0.0111907	0	0.0542804	0.14388	0	0	0.0915223	0.00552528	0.10268	0.0246746	0.0210456	0.0233029	0.042622	0.0415219	0.00367253	0.049853	8.15332e-20	0	0.00979039	1.74335e-17	0.00519331	0.00091325	0.00530189	0.0753087	0	0.0697946	0.0208111	0
GSM981669	0	7.04648e-18	0.245753	0.190975	1.02578e-17	0	0	0.0250009	1.58928e-18	0.0361916	0.0473305	0.0150807	0.0463856	0.0778956	1.09718e-18	0	0.0820569	0.00432361	0.000973234	0	0.00916429	0.00350173	0	7.1094e-18	0.135679	6.82252e-20	1.09373e-19	0.11339	0	0.118835	1.78149e-20	0.00474246	0.0118498	0.036437	0.0308904	0.00369289	0.174881	8.6196e-19	2.50793e-18	0.0089579	0	0	0.00845639	0	0.0592354	0	0.112291	3.94716e-19	0.0358285
GSM981670	0	4.24809e-18	0.130283	0.132572	6.27164e-19	0	0	0.00381216	0	0	0.0121877	0	0.0224101	0.0796384	0.00562453	0	0.0587185	0.000476282	0.000729482	2.17873e-19	0.00892034	0.0178727	5.14271e-18	0.0237269	0.177149	0	4.77036e-20	0.104596	0.00400584	0.0772582	0.0192592	0.0223351	0.017232	0.037487	0.047727	0.00519571	0.110935	8.47316e-05	0	0.0128794	1.01341e-17	0.000640643	0.00307925	0.0107687	0.0552525	0	0.0756311	0.0194539	0.0148188
GSM981671	1.35073e-18	1.47922e-18	0.0950492	0.170597	5.32167e-20	0	1.31246e-17	0.0170925	7.23297e-19	1.65748e-22	0.0272842	0.00814473	0.0342001	0.0321525	0.0252008	9.28657e-19	0.0493316	0	0	0.0138866	0.00778124	0.00587117	0	0.0863631	0.105146	1.92794e-19	0	0.0707233	0.00468378	0.126283	0.0241753	0.014114	0.0264318	0.0436833	0.0337583	0.00342697	0.0897302	0	0	0.00476253	0	0.0359643	0.00450351	0.00742782	0.0669483	1.97931e-17	0.0656257	0.00047707	8.16037e-18
GSM981672	0	0	0.061583	0.124942	1.65198e-18	1.51211e-18	4.65502e-18	0.00765596	3.41516e-19	0.0126538	0.0253275	0.00392435	0.0202205	0.0289457	0.00942607	0	0.0207874	5.90932e-20	0.00632908	0	0.00896902	0.000539651	1.82954e-17	0.02718	0.107736	0.00135411	0	0.072172	0.0103473	0.124823	0.0215397	0.0165865	0.016464	0.0389087	0.0585534	0.00251183	0.0600578	0.0049204	0	0	1.33967e-17	0.0571992	0.000953058	0.00928288	0.0836929	0.0347806	0.0452115	0.0485208	2.68259e-18
GSM981673	2.83767e-19	0	0	0.119805	0	0.00265151	6.25053e-18	0.0202446	0.0110243	0.0222704	0.00785662	1.77184e-18	0.0293978	0.0729003	0.00813405	0	1.24087e-18	0.000423514	0.00292459	0.0104359	0.0108148	0.0145716	4.63834e-18	0.0523605	0.147478	0	0	0.100354	0	0.0502695	0.023087	0.0170136	0.0162195	0.0396064	0.0512949	0.00279685	0.00697967	0.00624151	1.82686e-19	0.0112381	2.71282e-18	0.0556871	0.00304161	0.00607845	0.0650037	6.82832e-18	0.03668	0.0362435	4.66881e-19
GSM981674	0	0	0.110603	0.141697	0	6.3618e-19	9.01532e-18	0.0211327	0	0.0186752	0.0117636	0	0.0342025	0.0426146	0.00441213	0	0.0271841	0.00216056	0.000405201	0.00245446	0.00797973	0.000831672	0	0.0706521	0.126959	0.000678336	3.9791e-19	0.059954	0.00620589	0.0658187	0.0290441	0.0152906	0.0219733	0.0370486	0.050206	0.00303347	0.0932885	1.24226e-18	5.26879e-19	0.00219312	0	0.0245254	0.00404051	0.00821242	0.075368	7.77929e-19	0.0545283	0.0236332	0.00774272
GSM981675	0	6.69538e-18	0.0570217	0.113638	0	6.93411e-18	0	0	0	4.54541e-18	0	0	0.0248749	0.0658009	0.00390793	0	0.029476	2.29483e-20	0.00686878	0	0.00813047	0.0114067	4.67992e-18	0.0278867	0.177596	0	0	0.0827061	0	0.13804	0.0319832	0.0195019	0.0231314	0.036886	0.0832108	0.00336976	0.0608145	0	6.34544e-19	0.00380137	2.78169e-17	0.0172977	0.000448322	0.0126951	0.0499497	2.38995e-17	0.0607189	0.0564171	0
GSM981676	0	1.30239e-17	0.170723	0.133485	1.80825e-18	0.00666052	0	0.0415071	0	0.0957986	0.071904	0.0544415	0.0482377	0.0792106	4.60732e-19	0	0.0630405	0.00042993	0	0	0.00398576	0.0251322	0	1.06368e-17	0.127742	0	5.01988e-19	0.0988891	2.08435e-18	0.0669648	5.64241e-19	0.00504757	0.0161423	0.0379094	0.0104138	0.00249002	0.141943	1.89847e-18	5.30706e-18	0.0235422	4.93669e-18	4.67423e-19	0.00510224	0	0.0411892	0	0.0762709	1.26851e-18	0
GSM981677	1.1235e-18	5.85475e-18	0.0781938	0.122255	0	0.00212196	1.16907e-18	0.0309774	0.0103549	0.0744314	0.0566934	0.0379689	0.0377771	0.0538609	0	9.37065e-18	0.0244246	0.00473542	1.38955e-19	0	0.00110467	0.0124746	1.42475e-17	0.0310511	0.112186	2.00176e-18	2.80636e-19	0.110917	2.86978e-18	0.118053	0.0154665	0.019731	0.0159299	0.0467975	0.0265386	0.0028128	0.0765376	6.05144e-19	1.08397e-17	0.00943055	0	0.0087353	0.00237056	1.0494e-18	0.0532601	1.90813e-17	0.0596169	0.00714962	4.45355e-18
GSM981678	0	4.03021e-18	0.0409422	0.0651418	6.82229e-19	0	1.51654e-18	0.0063488	0	0	0.0112588	0	0.0371912	0.108964	1.64911e-19	0	0.026943	1.37813e-19	0.00816914	0.00411921	0.0199474	0.0199821	0	0	0.180727	0	2.84674e-20	0.0485076	0	0.0644587	0.0301308	0.0190282	0.0144711	0.0339378	0.0630656	0.00441846	0.045562	0	0.0105103	0.0198302	0	0.0153118	0.00382482	0.0202462	0.0333376	0	0.0448013	0.0546528	0
GSM981679	0	2.43394e-18	0.126339	0.151433	0	1.80622e-18	2.4562e-17	0.00871458	0.00576596	0.0361379	0.019946	0.0195518	0.0448249	0.0526615	0.0129066	0	0.0498675	0.0010528	0.00166017	2.34573e-19	0.00665068	0.00943763	9.34892e-19	0.0144174	0.0924748	4.40714e-19	5.55357e-19	0.0967008	0.00672655	0.130585	0.020158	0.0178394	0.022923	0.037323	0.0321609	0.00308646	0.0997889	0	4.16463e-18	0.0124644	1.39956e-17	0.0305224	0.00209208	0.00527482	0.0538513	1.43731e-17	0.0810912	8.60526e-20	0.0178421
GSM981680	0	2.83197e-18	0.0738933	0.134501	4.07619e-18	9.61578e-19	0	0.0158298	0	0.00817048	0.0308452	3.18944e-19	0.0372164	0.103503	0.015405	0	0.0569425	0.00252114	0.00402349	0	0.00940363	0.0291747	0	0.00603652	0.170525	4.0232e-20	0	0.069609	0.00287023	0.061619	0.0164156	0.0213426	0.013576	0.0395326	0.0677687	0.00377848	0.0720641	0	0	0.0231077	0	0.00736953	0.00607073	0.00700068	0.0235811	0	0.0629974	0.0767851	0.0126126
GSM981681	1.93589e-18	1.60995e-17	0.139383	0.138842	1.3224e-19	1.68851e-18	0	0.0161364	1.15706e-19	0.0240678	0.0256307	0.00766798	0.0440377	0.0716592	4.89015e-19	0	0.0262378	0.00191634	5.29826e-21	0	0.00139713	0.00884807	1.46405e-17	0	0.123149	0	0	0.0774457	1.15516e-19	0.118289	0.0287215	0.0234505	0.0197214	0.0279091	0.041433	0.00315125	0.113371	2.02562e-18	0	0.00727516	3.18988e-18	0.018005	0.0047612	0.00537448	0.0580199	3.3529e-18	0.0566532	0.0245637	2.62115e-18
GSM981682	7.89053e-20	0	0.112721	0.10464	2.97303e-18	0	5.92673e-18	0.0129945	7.4553e-18	0.0266421	0.0403713	0.0279721	0.0284592	0.0610438	0.00210196	3.15438e-20	0.0481944	0.00315319	0.00237827	0	0.00466997	0.0218771	2.93312e-18	0.0143136	0.149345	5.44704e-20	0	0.089414	1.7125e-19	0.0909692	0.0298279	0.0132457	0.0204708	0.0480177	0.0416342	0.00264646	0.10298	0.00160958	0	0.0148564	7.53536e-18	0.0247826	0.00258683	0.00569508	0.0619806	1.0573e-17	0.066556	0.0230476	0.0161407
GSM981683	2.37596e-19	0	0.125314	0.13569	2.48742e-18	0	6.03996e-18	0.0207831	0	0.0384887	0.0329412	0.00070854	0.0428027	0.0722938	0.0140672	6.83376e-18	0.0422787	0.00317709	0	0.00173216	0.00436679	0.010883	1.58611e-17	0.0466952	0.130526	2.25137e-19	4.78525e-19	0.0973628	0	0.0627104	0.0203239	0.012276	0.0179468	0.043123	0.0308185	0.00312243	0.106792	8.47108e-05	3.31788e-18	0.0103495	4.90283e-18	0.0202691	0.00427768	0.00424536	0.0825057	0	0.0700469	0.00425282	0.0151416
GSM981684	5.84098e-21	1.56534e-18	0.120834	0.130836	0	1.40574e-19	7.62027e-18	0.00865014	2.50746e-18	0	0.0209224	0.00417841	0.0297957	0.0554548	0.00912726	0	0.0425726	0	2.34565e-05	4.65702e-19	0.00801692	0.000528011	0	0.00428702	0.106323	0.00188819	0	0.0624904	0.0138214	0.0923146	0.045006	0.041103	0.0224496	0.0269935	0.0273088	0.00398825	0.101002	0.0139373	0.00912584	0.000394403	1.05214e-17	0.0390486	0.00207386	0.0117116	0.109991	0.0255079	0.0562441	0	0
GSM981685	0	3.17245e-18	0.164654	0.173401	0	0	5.32368e-18	0.0236106	1.61761e-19	0.0416796	0.0494565	0.0251501	0.0375326	0.0674646	0.00823401	4.9391e-18	0.040441	0.00744277	0	0.00824216	0.00146171	0.00739842	4.52189e-18	0.0479431	0.126265	6.21324e-20	0	0.10095	0	0.0926481	0.00522342	0.0114427	0.0155202	0.0541552	0.0302006	0.00196479	0.136138	0.00565412	0	0.00817016	0	3.02072e-18	0.00372863	7.50206e-19	0.0671008	1.87785e-18	0.0580007	0.0127775	6.30589e-19
GSM981686	0	3.28525e-18	0.0866196	0.161955	0	3.45654e-19	1.37704e-17	0.0212291	3.13181e-18	0.0101529	0.035142	0.0128221	0.0476019	0.0541749	0.01793	1.18159e-17	0.0424575	0.000213792	0.00101932	0	0.00559638	0.0290754	0	0.0660161	0.165793	2.25937e-19	0	0.102585	0	0.107343	0.0255164	0.0107792	0.0173138	0.0489354	0.0448846	0.00289363	0.0870207	1.07798e-20	0	0.0135064	3.10713e-17	0.0200932	0.0026588	0.00333056	0.0362791	2.56115e-17	0.0619819	0.0220429	4.60208e-18
GSM981687	3.72791e-19	6.11013e-18	0.151051	0.17783	6.53159e-18	6.29911e-18	0	0	1.33807e-17	7.21507e-19	0.0177931	0	0.0340607	0.0588292	0.0420926	0	0.0528471	5.69946e-22	0.00436323	0.0107416	0.0187243	0.0255653	2.5701e-17	0.0447736	0.163398	0.000182954	0	0.0596284	0.0350776	0.200012	0.0189754	0.0313377	0.0197279	0.0407469	0.0617375	0.00294061	0.139016	0.00305191	0	0.00656215	0	0.00912552	0.00456256	0.00408503	0.0263959	0	0.0769148	0.0488209	0
GSM981688	1.20564e-18	3.7475e-18	0.0745337	0.15065	2.34837e-18	0	0	0.0158087	3.65256e-18	0.0048042	0.0154717	0.0012722	0.0454169	0.0605516	0.00464628	0	0.0207229	0.00217026	0	8.73584e-20	0.00479937	0.00802157	0	0.0376388	0.101054	6.15538e-20	0	0.0769022	0.0023137	0.15621	0.0315397	0.0234211	0.0197077	0.0344946	0.0294572	0.00380655	0.0773046	1.45407e-19	5.56073e-19	0.00642736	0	0.0494083	0.00220693	0.0116017	0.0509253	1.09644e-18	0.0535054	0.0107411	0
GSM981689	1.83573e-18	8.80769e-18	0.18605	0.141689	0	0.0106002	1.38373e-17	0.0332044	0.00228774	0.0413809	0.0412161	0.000648888	0.0588937	0.10382	0.00675039	0	0.0616791	0.00488809	0	0.00443268	0.00350837	0.0324881	1.65164e-18	0.0609239	0.171724	0	3.43953e-19	0.118609	0	0.132623	0.00567184	0.0105623	0.0174817	0.0494344	0.0428135	0.00224603	0.147678	0	2.04572e-18	0.0200086	1.28191e-17	7.34651e-19	0.00605425	3.05965e-19	0.0449797	0	0.0842145	0.0311689	0
GSM981690	1.543e-18	3.6731e-19	0.115171	0.156629	3.78671e-18	4.12551e-18	4.38461e-18	0.0224565	1.17e-19	0.0484547	0.0448664	0.0138577	0.0432243	0.0568933	0.00840747	0	0.0325629	0.00488172	0.000716381	2.28954e-19	0.00689967	0.00672351	4.94998e-18	0.0441431	0.159023	1.08552e-19	0	0.106704	5.42101e-20	0.155075	0.0224004	0.0186584	0.0189457	0.0407701	0.0470857	0.0034048	0.110251	0	0	0.00243083	3.03204e-17	0.00504363	0.0028479	0.0010487	0.0714981	0	0.0540371	0.0246639	1.5963e-18
GSM981691	0	2.12145e-18	0.104535	0.135107	0	3.02801e-20	3.44293e-18	0.0121326	0	0.00806094	0.0376021	0.00515572	0.0315081	0.131279	0.0100128	0	0.0435426	0.00277169	0.00272629	0.00836288	0.00503123	0.0226442	3.89997e-18	0.0158969	0.166303	0	2.96047e-19	0.104529	0	0.110751	0.0193972	0.019706	0.0149647	0.0447788	0.0494184	0.00287647	0.0939171	6.68602e-19	9.81306e-18	0.0126241	0	0.0274141	0.00320301	0.00517498	0.0608202	7.33323e-18	0.0700804	0.0317378	9.41234e-18
GSM981692	0	1.24614e-17	0.15482	0.163495	0	5.40069e-19	1.15999e-17	0.0193709	9.94529e-18	0.0267249	0.0488678	0.0253832	0.0484113	0.100486	1.64351e-18	1.89113e-17	0.076612	0.000407671	0	2.74604e-18	0.000771807	0.0360132	0	0	0.122451	0	0	0.123205	4.7712e-19	0.121341	0.00212662	0.00692484	0.0151192	0.0378354	0.0384207	0.00312634	0.127789	1.31808e-18	7.23956e-17	0.019507	1.22607e-17	0	0.00242527	1.39677e-18	0.0469601	3.06067e-17	0.111624	0.0151887	0.00435911
GSM981693	2.55745e-19	1.66043e-17	0.18257	0.1383	0	0.0105981	4.66881e-18	0.042759	8.4977e-20	0.0505433	0.0582713	0.0219517	0.0525459	0.0616055	0.00202917	0	0.0671676	0.00415231	1.92375e-20	0	0.00568929	0.0151256	0	0.0156135	0.133284	0	3.30604e-19	0.128997	0	0.116717	0.0115481	0.0135483	0.0151683	0.0402576	0.0198983	0.0031547	0.143862	0	0	0.0129477	0	0	0.00497255	0	0.0681628	0	0.0829548	1.14234e-18	1.04821e-18
GSM981694	1.03887e-18	1.43013e-17	0.196149	0.1455	0	0.0010933	0	0.0538959	0.0116951	0.0968344	0.066088	0.0444426	0.0714827	0.0622688	2.85135e-18	1.52527e-17	0.0448035	0.00245923	0	2.96638e-18	0.000165054	0	9.67886e-18	7.11737e-18	0.097729	0	0	0.0834681	3.10764e-17	0.0931276	1.36496e-19	0.0155393	0.0149047	0.0246883	0.00298509	0.00170382	0.144213	9.93223e-19	3.68326e-18	0.000701371	2.33627e-18	0	0.00599374	0	0.0636229	3.78554e-17	0.094577	0	0
GSM981695	0	5.20393e-18	0.154065	0.196798	1.06827e-17	0	8.0374e-18	0.0188403	6.2991e-18	0.015939	0.033355	0.00804347	0.0467097	0.0695683	0.0151539	3.62553e-18	0.0499726	0.00185788	0.000984129	2.46341e-19	0	0.0222312	1.62817e-18	0.0226866	0.148727	0	0	0.109771	0.00572101	0.16031	0.00560132	0.0116972	0.0126724	0.0463019	0.0465075	0.00203135	0.127786	0	1.73542e-17	0.0166123	0	2.6503e-18	0.00539368	0	0.0431728	5.75872e-18	0.0810863	0.0317579	5.55148e-18
GSM981696	2.98588e-18	5.16666e-18	0.190957	0.2091	4.95985e-18	1.19521e-17	2.82796e-17	0.0347193	0	0	0.0446556	0	0.0574276	0.108988	0.0338338	2.29555e-17	0.0718736	6.16439e-20	0	6.39448e-19	0.00701024	0.00785016	1.0617e-18	0.0464673	0.123505	8.05467e-19	0	0.0771128	0.0141685	0.17011	0.0105706	0.0105732	0.0201348	0.0310553	0.0166593	0.00323285	0.1428	0	9.29882e-18	0.00570181	1.51887e-17	0	0.00512321	0.00239103	0.0404822	0	0.116071	0	1.20177e-18
GSM981697	0	5.16439e-18	0.234229	0.16546	0	5.46953e-18	6.7945e-18	0.0304357	1.88137e-18	0.0424379	0.0580965	0.0654464	0.0718734	0.0759078	0	7.37214e-18	0.123686	3.98119e-20	0	1.74508e-18	0.00033367	0.00337543	0	0.0116551	0.0687259	0	5.26978e-19	0.0904077	6.37654e-18	0.160199	0	0.00483654	0.0177165	0.0306203	0.00749915	0.00299126	0.153876	2.69456e-18	1.52971e-17	0.00277832	0	8.49579e-19	0.00412166	2.47732e-18	0.0572098	3.04211e-17	0.115583	2.99943e-18	0
GSM981698	2.70396e-18	2.12608e-18	0.185809	0.17481	1.00439e-17	0	1.656e-17	0.0127254	0	0.0170042	0.0515656	0.0541346	0.0569574	0.126963	2.4459e-20	2.43808e-17	0.0898115	1.32476e-21	0	0	0.00671547	0.0241781	2.4029e-17	2.94368e-18	0.118096	0	0	0.0800124	0	0.155648	0.0164155	0.0168993	0.021572	0.041112	0.0268357	0.0027249	0.135395	0.00444398	0	0.0121386	7.83577e-18	0.0010057	0.00370961	2.97567e-19	0.0741925	8.13495e-18	0.0846338	0	5.53754e-18
GSM981699	0	1.41798e-17	0.059742	0.154553	0	3.33328e-18	0	0.00385161	0	6.05578e-19	0.0285186	0.0170874	0.0438861	0.0600141	0.0141703	3.72486e-18	0.0160866	0.00238799	0.00941473	5.9775e-19	0.0113066	0.0118678	2.98973e-17	0.0227361	0.165272	0	0	0.0947549	7.80105e-19	0.161067	0.0501823	0.0409689	0.0254953	0.0365086	0.0504745	0.00311876	0.0678377	0.00950197	5.14502e-19	0.00763351	0	0.0445869	0.00185605	0.0100107	0.082276	2.66084e-18	0.0570496	0.00625999	7.47896e-18
GSM981700	0	3.03355e-18	0.0445157	0.199975	0	4.87302e-18	9.36025e-18	0.0181862	0	0.0346643	0.055454	0.054628	0.0613972	0.100536	0.0100524	2.96481e-18	0.0321846	0.000810113	0.00144623	0	0	0.0396648	1.14588e-17	0.00189	0.12056	0	1.61424e-18	0.115279	1.34273e-19	0.126556	0.00985549	0.0191299	0.0201982	0.0434482	0.0323327	0.00342468	0.0424506	0.0167005	0	0.0189259	3.21175e-18	0.0201135	0.00218458	4.96218e-20	0.0701014	0	0.0461024	3.14835e-20	1.56916e-17
GSM981701	5.13914e-19	4.8309e-19	0.122056	0.139582	1.50961e-18	6.07868e-18	1.10612e-17	0.0276482	0	0.0368113	0.0592805	0.0428672	0.0532248	0.0568943	0.0172689	2.46578e-18	0.0370026	0.000153014	5.02234e-05	0.0213957	0.0155102	0.0129191	0	0.0553735	0.134343	1.0973e-20	0	0.123231	0.00164125	0.166751	0.0129439	0.0155912	0.0177215	0.0420786	0.0314396	0.00297845	0.110115	0	3.14696e-19	0.00402334	0	0.0308595	0.0041415	0	0.0754032	0.0060824	0.0852449	0.00807189	0
GSM981702	0	5.83606e-18	0.116419	0.214751	0	1.23077e-18	1.18392e-17	0.0196961	0	0.0384309	0.0511603	0.0287303	0.0593463	0.0508422	0.00853337	0	0.06099	0	0.00138793	9.93042e-19	0	0.0249883	0	0.0231252	0.138839	4.05326e-20	9.02571e-19	0.136732	2.069e-18	0.147761	0.00982863	0.0172261	0.0185754	0.041418	0.0551822	0.00311096	0.0917392	7.47714e-19	0	0.0168573	0	0.00026162	0.0027606	0	0.0783845	1.35214e-17	0.0640414	0.0409525	5.84032e-20
GSM981703	0	0	0.132288	0.188354	5.46806e-18	1.52491e-17	9.48518e-18	0.016258	0	0.0364601	0.0580712	0.0588361	0.0525032	0.0876862	0.00492589	1.16933e-18	0.073446	6.1602e-22	0.00147482	2.57215e-18	0.00277105	0.0244888	6.81301e-18	0.0189178	0.121625	1.38153e-19	7.00499e-19	0.115415	0	0.12767	0.0128923	0.0220828	0.0212204	0.0466937	0.0272347	0.00355515	0.107632	0.0131186	0	0.0218943	6.68247e-18	0.00711617	0.00485517	0	0.0658065	0	0.086597	6.93672e-19	5.05645e-18
GSM981704	9.13292e-19	3.37654e-18	0.0871075	0.130479	0	4.27651e-19	3.4443e-18	0.00716894	1.48589e-18	0	0.0201901	0.0112485	0.0528653	0.116731	0.0342272	0	0.0471642	0.00109038	0.012238	0.00587871	0.00518581	0.0396883	0	0.0618695	0.23738	0	0	0.123501	0	0.147863	0.0265986	0.0249846	0.015035	0.0499834	0.0608893	0.00331495	0.0960009	0	6.28168e-18	0.0147219	0	0.039405	0.00436872	0.0015954	0.056123	2.44739e-18	0.0633237	0.0504076	0
[truncated: 948 more rows]
[truncated: 18 more columns]
