# Supplementary material
Source: publisher site journal article supplement (doi:10.18632/aging.206048)
Supplement: Supplementary file 5 [file aging-v16-206048-supplementary-material-SD6.xlsx]

## Sheet: Sheet 1
Supplementary Table 5. Differentially expressed genes among inferred PTB subtypes.
	p_val	avg_log2FC	pct.1	pct.2	p_val_adj	cluster	gene
F5	1.77942e-52	0.106877	0.996	0.999	1.5077e-48	C1	F5
SLC22A15	3.12068e-51	0.0813334	1	1	2.64415e-47	C1	SLC22A15
GK	8.75368e-41	0.108807	1	1	7.41699e-37	C1	GK
IL18R1	4.42551e-38	0.112611	1	1	3.74973e-34	C1	IL18R1
AIM2	4.99923e-37	0.103418	1	0.999	4.23585e-33	C1	AIM2
CLEC4D	1.7926e-35	0.106561	1	1	1.51887e-31	C1	CLEC4D
PDK3	2.11025e-35	0.0535889	1	1	1.78802e-31	C1	PDK3
RAB20	1.59663e-34	0.112929	1	0.999	1.35282e-30	C1	RAB20
CR1	8.90685e-33	0.144895	1	0.999	7.54677e-29	C1	CR1
ETS2	1.01084e-31	0.0832507	1	1	8.56486e-28	C1	ETS2
LMNB1	2.21145e-31	0.107099	1	0.999	1.87376e-27	C1	LMNB1
CLEC5A	9.06587e-31	0.102068	1	1	7.68151e-27	C1	CLEC5A
ST3GAL4	8.3553e-30	0.12389	1	1	7.07944e-26	C1	ST3GAL4
IER3	1.42279e-29	0.0545114	0.983	0.99	1.20553e-25	C1	IER3
MCTP2	2.00854e-29	0.123819	1	0.999	1.70184e-25	C1	MCTP2
PHTF1	2.01015e-29	0.0753267	1	1	1.7032e-25	C1	PHTF1
CHSY1	4.76958e-29	0.060921	1	0.999	4.04127e-25	C1	CHSY1
REPS2	1.17233e-28	0.103477	1	0.999	9.93319e-25	C1	REPS2
TLR8	1.25765e-28	0.0815357	1	0.999	1.06561e-24	C1	TLR8
PROK2	1.79575e-28	0.0941888	1	1	1.52154e-24	C1	PROK2
DSC2	1.8228e-28	0.108165	1	1	1.54446e-24	C1	DSC2
ACSL1	2.19787e-28	0.10801	1	0.997	1.86226e-24	C1	ACSL1
TLR4	2.73811e-28	0.0983579	1	0.999	2.32e-24	C1	TLR4
PYGL	3.7159e-27	0.0912571	1	1	3.14848e-23	C1	PYGL
MMP9	4.9348e-27	0.122086	1	1	4.18126e-23	C1	MMP9
DYSF	9.16848e-27	0.103035	1	0.999	7.76846e-23	C1	DYSF
TNFAIP6	1.47009e-26	0.0993417	1	0.999	1.24561e-22	C1	TNFAIP6
ARG1	2.26888e-26	0.137283	0.998	0.989	1.92242e-22	C1	ARG1
TLR6	3.79786e-26	0.0768034	1	1	3.21792e-22	C1	TLR6
EXT1	5.14909e-26	0.0550083	1	0.998	4.36283e-22	C1	EXT1
NCF4	8.21093e-26	0.0711283	1	0.999	6.95712e-22	C1	NCF4
C1RL	1.19869e-25	0.0830462	1	0.999	1.01565e-21	C1	C1RL
ANKRD22	3.56455e-25	0.143904	1	0.992	3.02025e-21	C1	ANKRD22
ITGAM	3.7094e-25	0.072108	1	1	3.14297e-21	C1	ITGAM
SRPK1	1.17271e-24	0.0881117	1	0.997	9.9364e-21	C1	SRPK1
VNN2	2.24896e-24	0.087584	1	0.999	1.90554e-20	C1	VNN2
NFIL3	2.47482e-24	0.0764474	1	0.998	2.09691e-20	C1	NFIL3
VNN3	3.64694e-24	0.100667	1	0.998	3.09005e-20	C1	VNN3
IL1B	4.8139e-24	0.0874748	1	0.999	4.07882e-20	C1	IL1B
STEAP4	6.08175e-24	0.121534	0.998	0.998	5.15307e-20	C1	STEAP4
PGD	7.6192e-24	0.0778699	1	1	6.45575e-20	C1	PGD
TNFRSF1A	9.99473e-24	0.0727671	1	0.998	8.46854e-20	C1	TNFRSF1A
LHFPL2	1.67044e-23	0.0655879	1	1	1.41536e-19	C1	LHFPL2
NT5C2	1.69317e-23	0.0371428	1	1	1.43463e-19	C1	NT5C2
TNFSF13B	2.21487e-23	0.060177	1	1	1.87666e-19	C1	TNFSF13B
ABHD5	2.54333e-23	0.0682896	1	1	2.15497e-19	C1	ABHD5
FRAT1	4.92647e-23	0.0815706	1	1	4.1742e-19	C1	FRAT1
LOXL3	6.50349e-23	0.0597588	1	0.999	5.5104e-19	C1	LOXL3
CTBS	9.83966e-23	0.0675838	1	1	8.33714e-19	C1	CTBS
IFNAR1	1.68212e-22	0.0704933	1	1	1.42526e-18	C1	IFNAR1
PELI2	2.13463e-22	0.0476501	1	1	1.80867e-18	C1	PELI2
MPZ	3.19376e-22	0.0544476	1	0.998	2.70607e-18	C1	MPZ
SLA	8.76479e-22	0.0573795	1	1	7.42641e-18	C1	SLA
BCL3	1.00411e-21	0.0728129	1	1	8.50781e-18	C1	BCL3
ST3GAL6	1.02909e-21	0.0478409	1	1	8.71945e-18	C1	ST3GAL6
SDCBP	1.6472e-21	0.0768665	1	1	1.39567e-17	C1	SDCBP
PLAUR	2.46679e-21	0.0800093	1	0.999	2.09011e-17	C1	PLAUR
SLC37A3	3.10555e-21	0.0837325	1	1	2.63133e-17	C1	SLC37A3
CPD	3.47555e-21	0.0729976	0.998	0.998	2.94483e-17	C1	CPD
PILRA	4.06565e-21	0.0692425	1	0.999	3.44482e-17	C1	PILRA
B4GALT5	5.45927e-21	0.0748674	0.998	1	4.62564e-17	C1	B4GALT5
FLOT1	5.69805e-21	0.0778194	0.983	0.99	4.82795e-17	C1	FLOT1
RAF1	6.31752e-21	0.050293	1	1	5.35284e-17	C1	RAF1
PLSCR1	8.69425e-21	0.105498	1	0.999	7.36664e-17	C1	PLSCR1
RAB32	1.06105e-20	0.0504903	1	1	8.99026e-17	C1	RAB32
IL1RAP	1.08172e-20	0.0984341	0.998	0.996	9.16541e-17	C1	IL1RAP
BASP1	1.1072e-20	0.0843133	1	1	9.3813e-17	C1	BASP1
KBTBD7	1.61096e-20	0.048347	0.998	0.999	1.36497e-16	C1	KBTBD7
FPR1	2.1169e-20	0.0921133	1	0.993	1.79365e-16	C1	FPR1
BST1	3.07574e-20	0.0888759	1	1	2.60607e-16	C1	BST1
NFKBIZ	3.20158e-20	0.0585175	1	1	2.71269e-16	C1	NFKBIZ
SLC19A1	7.64476e-20	0.0835909	1	0.999	6.4774e-16	C1	SLC19A1
SOCS3	1.08272e-19	0.152839	1	0.998	9.17391e-16	C1	SOCS3
TBC1D14	1.12929e-19	0.0563537	1	0.999	9.56848e-16	C1	TBC1D14
RIT1	1.17251e-19	0.0702062	1	0.999	9.93469e-16	C1	RIT1
RFX2	1.52931e-19	0.0993115	1	0.999	1.29579e-15	C1	RFX2
FOS	1.97898e-19	0.0562038	1	1	1.67679e-15	C1	FOS
CD58	1.98919e-19	0.0361945	1	0.999	1.68544e-15	C1	CD58
JUNB	2.02926e-19	0.0819614	1	1	1.71939e-15	C1	JUNB
RNF149	2.16681e-19	0.0737572	1	1	1.83594e-15	C1	RNF149
SH3GLB1	2.93879e-19	0.0643267	1	0.999	2.49004e-15	C1	SH3GLB1
IL1RN	3.56048e-19	0.0920088	1	1	3.0168e-15	C1	IL1RN
DGAT2	4.97929e-19	0.111121	1	0.999	4.21896e-15	C1	DGAT2
IVNS1ABP	5.26263e-19	0.0523083	1	1	4.45902e-15	C1	IVNS1ABP
LACTB	5.68695e-19	0.0676512	1	1	4.81856e-15	C1	LACTB
RAB33B	6.11004e-19	0.0736804	1	0.998	5.17704e-15	C1	RAB33B
ATF6	6.26713e-19	0.0639368	1	0.998	5.31014e-15	C1	ATF6
RP2	6.97167e-19	0.0705572	1	0.999	5.9071e-15	C1	RP2
SOD2	8.86123e-19	0.0892265	1	1	7.50812e-15	C1	SOD2
HCK	9.07654e-19	0.0635464	1	1	7.69055e-15	C1	HCK
FCHO2	1.13261e-18	0.0694404	1	0.999	9.5966e-15	C1	FCHO2
SERPINA1	1.25264e-18	0.0909799	1	0.998	1.06136e-14	C1	SERPINA1
CDS2	1.58641e-18	0.0706545	1	1	1.34417e-14	C1	CDS2
SEMA4A	1.59139e-18	0.080911	1	0.999	1.34839e-14	C1	SEMA4A
CRISPLD2	1.71575e-18	0.098123	1	0.997	1.45376e-14	C1	CRISPLD2
SELL	1.8221e-18	0.0728933	1	1	1.54387e-14	C1	SELL
CSF3R	2.05087e-18	0.0838476	1	1	1.7377e-14	C1	CSF3R
RNF13	2.18861e-18	0.0542146	1	1	1.85441e-14	C1	RNF13
AQP9	2.38707e-18	0.0785856	1	1	2.02256e-14	C1	AQP9
QPCT	2.56301e-18	0.0874195	1	1	2.17164e-14	C1	QPCT
LAT2	3.0723e-18	0.0557081	1	1	2.60316e-14	C1	LAT2
GMPR2	4.01279e-18	0.0500771	1	0.999	3.40003e-14	C1	GMPR2
CCR1	4.6215e-18	0.062654	1	1	3.9158e-14	C1	CCR1
SNX13	5.07393e-18	0.049846	1	1	4.29914e-14	C1	SNX13
MTMR3	5.79447e-18	0.0763739	1	0.997	4.90965e-14	C1	MTMR3
TLR2	5.86642e-18	0.111888	1	0.999	4.97062e-14	C1	TLR2
MAPK14	7.58914e-18	0.117792	1	1	6.43028e-14	C1	MAPK14
ADAM17	9.57173e-18	0.0426612	1	0.999	8.11013e-14	C1	ADAM17
HSPBAP1	9.77331e-18	0.0351053	1	1	8.28093e-14	C1	HSPBAP1
SLC40A1	1.0668e-17	0.0704231	1	1	9.03903e-14	C1	SLC40A1
RBMS1	1.46484e-17	0.0600983	1	0.999	1.24116e-13	C1	RBMS1
ANPEP	1.52404e-17	0.0849524	1	0.999	1.29132e-13	C1	ANPEP
RALB	1.7832e-17	0.0783213	1	1	1.5109e-13	C1	RALB
SIRPB1	1.88233e-17	0.0975655	1	0.999	1.5949e-13	C1	SIRPB1
FES	2.31926e-17	0.0632741	1	0.999	1.9651e-13	C1	FES
TRIM21	2.58789e-17	0.0630083	1	0.999	2.19272e-13	C1	TRIM21
PICALM	2.64327e-17	0.0685435	1	1	2.23964e-13	C1	PICALM
STAT3	2.86632e-17	0.0643672	1	1	2.42863e-13	C1	STAT3
ENTPD1	3.44557e-17	0.0800483	1	0.998	2.91943e-13	C1	ENTPD1
RTN2	3.80096e-17	0.0741275	0.992	0.99	3.22055e-13	C1	RTN2
SLC6A6	4.0979e-17	0.0824538	1	1	3.47215e-13	C1	SLC6A6
LILRA5	4.23539e-17	0.0934734	0.983	0.99	3.58864e-13	C1	LILRA5
STX11	5.19146e-17	0.0732001	1	0.999	4.39872e-13	C1	STX11
MYL9	5.43659e-17	0.109016	0.998	0.997	4.60642e-13	C1	MYL9
SLC16A6	5.88014e-17	0.0390559	0.998	1	4.98224e-13	C1	SLC16A6
NUMB	6.01535e-17	0.0670258	1	1	5.09681e-13	C1	NUMB
MXD3	7.01802e-17	0.078805	1	1	5.94637e-13	C1	MXD3
SORT1	9.01375e-17	0.0747134	1	1	7.63735e-13	C1	SORT1
PHF21A	1.13026e-16	0.0658822	1	1	9.5767e-13	C1	PHF21A
RCBTB2	1.15945e-16	0.0566662	1	0.999	9.82399e-13	C1	RCBTB2
PIAS1	1.49361e-16	0.041141	1	1	1.26554e-12	C1	PIAS1
ZDHHC18	1.73307e-16	0.0767157	1	1	1.46843e-12	C1	ZDHHC18
SMARCD3	2.34483e-16	0.108446	1	0.997	1.98677e-12	C1	SMARCD3
ABCA1	2.61048e-16	0.0650888	1	1	2.21186e-12	C1	ABCA1
ALOX12	3.35119e-16	0.065254	1	1	2.83946e-12	C1	ALOX12
NCF2	3.48079e-16	0.0576426	1	1	2.94927e-12	C1	NCF2
PADI2	3.98959e-16	0.116823	1	0.998	3.38038e-12	C1	PADI2
G0S2	4.58217e-16	0.103505	0.998	0.954	3.88247e-12	C1	G0S2
KLHL8	4.97619e-16	0.0346732	1	1	4.21633e-12	C1	KLHL8
PELO	5.60457e-16	0.0389334	0.998	0.999	4.74875e-12	C1	PELO
GADD45B	5.6732e-16	0.0504824	1	1	4.8069e-12	C1	GADD45B
SHKBP1	5.87386e-16	0.0754208	1	1	4.97692e-12	C1	SHKBP1
ABHD2	6.15233e-16	0.0927883	1	0.998	5.21287e-12	C1	ABHD2
SLC12A6	6.26008e-16	0.0683361	1	1	5.30417e-12	C1	SLC12A6
TLE4	8.03423e-16	0.0442248	1	1	6.8074e-12	C1	TLE4
AFF1	8.05742e-16	0.0634897	1	1	6.82705e-12	C1	AFF1
SVIL	8.24535e-16	0.0759702	1	0.999	6.98628e-12	C1	SVIL
MYD88	8.28822e-16	0.0512367	1	1	7.02261e-12	C1	MYD88
DNTTIP1	9.26773e-16	0.0431485	1	0.999	7.85255e-12	C1	DNTTIP1
CYB5R4	1.2737e-15	0.0524717	1	1	1.0792e-11	C1	CYB5R4
PANX2	1.35026e-15	0.0737607	0.994	0.993	1.14408e-11	C1	PANX2
CSNK1D	1.51294e-15	0.0520478	1	1	1.28191e-11	C1	CSNK1D
TRAFD1	1.58093e-15	0.0658919	1	0.999	1.33952e-11	C1	TRAFD1
CEBPD	1.77192e-15	0.0562848	1	1	1.50135e-11	C1	CEBPD
APH1B	1.80452e-15	0.0413382	1	1	1.52897e-11	C1	APH1B
PTPRE	2.03128e-15	0.0501317	1	1	1.7211e-11	C1	PTPRE
IL13RA1	2.11974e-15	0.04688	1	1	1.79606e-11	C1	IL13RA1
FKBP5	2.27311e-15	0.0714346	1	1	1.92601e-11	C1	FKBP5
MSRB3	2.50037e-15	0.040708	0.998	0.998	2.11856e-11	C1	MSRB3
FOLR3	2.6702e-15	0.088452	1	1	2.26246e-11	C1	FOLR3
DDAH2	2.84477e-15	0.0575489	0.983	0.99	2.41037e-11	C1	DDAH2
HDAC4	3.31379e-15	0.0798885	1	0.998	2.80777e-11	C1	HDAC4
APBB1IP	3.91984e-15	0.0507396	1	1	3.32128e-11	C1	APBB1IP
GNAQ	4.13506e-15	0.071018	0.998	0.999	3.50364e-11	C1	GNAQ
LRRFIP2	4.91876e-15	0.0441605	1	0.998	4.16767e-11	C1	LRRFIP2
LTB4R	5.01627e-15	0.0707891	1	1	4.25028e-11	C1	LTB4R
CXCL1	5.38028e-15	0.0831099	1	0.996	4.55871e-11	C1	CXCL1
SESTD1	6.32438e-15	0.048097	1	1	5.35864e-11	C1	SESTD1
SPPL2A	6.39901e-15	0.029124	1	1	5.42188e-11	C1	SPPL2A
STXBP5	6.90763e-15	0.0444753	0.998	1	5.85283e-11	C1	STXBP5
MCL1	7.7741e-15	0.0442843	1	1	6.587e-11	C1	MCL1
IL10RB	7.98467e-15	0.0579721	1	1	6.76541e-11	C1	IL10RB
SLC2A3	1.01226e-14	0.0832642	1	0.999	8.57688e-11	C1	SLC2A3
DUSP1	1.2376e-14	0.0628236	1	1	1.04862e-10	C1	DUSP1
STAT5B	1.31587e-14	0.0624204	1	1	1.11494e-10	C1	STAT5B
GIT2	1.32462e-14	0.0531839	1	1	1.12235e-10	C1	GIT2
CNIH4	1.41688e-14	0.0405056	1	1	1.20052e-10	C1	CNIH4
IMPA2	1.4326e-14	0.0530249	1	1	1.21384e-10	C1	IMPA2
HINT3	1.47427e-14	0.043565	0.998	0.997	1.24915e-10	C1	HINT3
HIF1A	1.49555e-14	0.0684843	1	0.999	1.26718e-10	C1	HIF1A
SLCO3A1	1.71243e-14	0.0709117	0.998	0.999	1.45095e-10	C1	SLCO3A1
CKAP4	2.18016e-14	0.0657056	1	1	1.84725e-10	C1	CKAP4
SLK	2.48611e-14	0.0499803	1	0.998	2.10648e-10	C1	SLK
PISD	2.60145e-14	0.0573599	1	1	2.20421e-10	C1	PISD
MEFV	2.82802e-14	0.0733714	1	0.999	2.39618e-10	C1	MEFV
GRB2	4.06226e-14	0.052909	1	0.999	3.44195e-10	C1	GRB2
CD53	6.05932e-14	0.0427356	1	1	5.13406e-10	C1	CD53
HAL	6.11504e-14	0.08066	1	0.998	5.18128e-10	C1	HAL
SORL1	6.76226e-14	0.0613246	1	1	5.72966e-10	C1	SORL1
SNX10	6.89067e-14	0.0518662	1	1	5.83846e-10	C1	SNX10
RAB31	7.27871e-14	0.0640404	1	0.999	6.16725e-10	C1	RAB31
HK2	7.44467e-14	0.0411013	1	1	6.30787e-10	C1	HK2
RNF130	7.76697e-14	0.0421902	1	1	6.58095e-10	C1	RNF130
TREML1	7.94385e-14	0.0723452	0.994	0.999	6.73083e-10	C1	TREML1
HEBP2	8.2431e-14	0.0451288	1	1	6.98437e-10	C1	HEBP2
LITAF	8.92281e-14	0.0619758	1	0.999	7.5603e-10	C1	LITAF
DHRS9	9.60094e-14	0.0741304	1	0.999	8.13488e-10	C1	DHRS9
FLOT2	1.06771e-13	0.0686408	1	1	9.04668e-10	C1	FLOT2
ARHGAP27	1.2547e-13	0.0543829	1	1	1.06311e-09	C1	ARHGAP27
CXCL16	1.32532e-13	0.0752313	1	1	1.12295e-09	C1	CXCL16
RHOT1	1.45978e-13	0.0532898	1	1	1.23687e-09	C1	RHOT1
NARF	1.55156e-13	0.0491111	1	1	1.31463e-09	C1	NARF
TKT	1.56063e-13	0.0394066	1	1	1.32232e-09	C1	TKT
MAPK1	1.58395e-13	0.042787	1	1	1.34208e-09	C1	MAPK1
AGTRAP	1.65162e-13	0.0711136	1	0.999	1.39942e-09	C1	AGTRAP
PTAFR	1.65951e-13	0.0654561	1	1	1.4061e-09	C1	PTAFR
PRKCD	1.6977e-13	0.0432046	1	1	1.43846e-09	C1	PRKCD
GNB2	1.86522e-13	0.0593682	1	1	1.5804e-09	C1	GNB2
ZNF350	1.91108e-13	0.0305479	1	0.999	1.61926e-09	C1	ZNF350
BAZ2B	1.93137e-13	0.043483	1	1	1.63645e-09	C1	BAZ2B
VASP	2.53178e-13	0.0704987	1	1	2.14518e-09	C1	VASP
SLPI	2.90797e-13	0.0695239	1	0.997	2.46392e-09	C1	SLPI
ALOX5AP	3.06437e-13	0.0478524	1	1	2.59644e-09	C1	ALOX5AP
MLKL	3.32846e-13	0.0627865	1	1	2.8202e-09	C1	MLKL
RTN3	3.37225e-13	0.0739298	1	1	2.8573e-09	C1	RTN3
PGM2	3.70078e-13	0.0500443	1	0.999	3.13567e-09	C1	PGM2
RAB1A	3.94597e-13	0.0488356	1	1	3.34342e-09	C1	RAB1A
FBXO6	4.15051e-13	0.051914	1	0.999	3.51673e-09	C1	FBXO6
NPL	4.30231e-13	0.0551244	1	1	3.64535e-09	C1	NPL
HTATIP2	4.50384e-13	0.0435307	1	1	3.81611e-09	C1	HTATIP2
SDF2	4.79367e-13	0.027792	1	1	4.06167e-09	C1	SDF2
JAK2	5.30414e-13	0.0530996	1	0.999	4.4942e-09	C1	JAK2
FAM49A	5.41527e-13	0.0544053	1	0.999	4.58836e-09	C1	FAM49A
MSRA	5.60945e-13	0.0210124	1	1	4.75289e-09	C1	MSRA
TLR1	6.73271e-13	0.0754629	1	1	5.70463e-09	C1	TLR1
IFI16	6.79906e-13	0.056602	1	0.999	5.76085e-09	C1	IFI16
PADI4	7.03458e-13	0.0732728	1	1	5.9604e-09	C1	PADI4
POR	7.11118e-13	0.0620298	0.998	0.997	6.0253e-09	C1	POR
GBGT1	8.28637e-13	0.0376289	0.998	0.999	7.02104e-09	C1	GBGT1
CANT1	8.80897e-13	0.0495253	1	0.999	7.46384e-09	C1	CANT1
MGST1	1.06547e-12	0.0526149	1	1	9.02772e-09	C1	MGST1
ATP6V0D1	1.09532e-12	0.0524378	1	0.999	9.28065e-09	C1	ATP6V0D1
FCER1G	1.36351e-12	0.0639641	1	1	1.1553e-08	C1	FCER1G
ZFP36	1.52506e-12	0.0493914	1	1	1.29218e-08	C1	ZFP36
DOK3	1.79586e-12	0.101643	1	0.997	1.52163e-08	C1	DOK3
MNDA	1.87774e-12	0.0601344	1	1	1.59101e-08	C1	MNDA
LPGAT1	2.11582e-12	0.0629911	1	0.999	1.79274e-08	C1	LPGAT1
PGK1	2.46033e-12	0.0397067	0.998	0.999	2.08464e-08	C1	PGK1
PLB1	2.95902e-12	0.0816088	1	0.999	2.50717e-08	C1	PLB1
ASGR2	4.05782e-12	0.0589826	0.998	0.999	3.43819e-08	C1	ASGR2
CASP4	4.18109e-12	0.0733509	1	1	3.54264e-08	C1	CASP4
KLHL21	4.75669e-12	0.0524051	1	0.998	4.03034e-08	C1	KLHL21
PELI1	4.83299e-12	0.0624024	1	0.999	4.09499e-08	C1	PELI1
PIK3CD	5.62869e-12	0.0485389	1	1	4.76919e-08	C1	PIK3CD
TREM1	5.69322e-12	0.0809709	1	1	4.82387e-08	C1	TREM1
CEACAM4	6.40506e-12	0.0808576	1	0.999	5.42701e-08	C1	CEACAM4
LRRC25	6.87398e-12	0.0635331	1	0.999	5.82432e-08	C1	LRRC25
ANTXR2	7.79887e-12	0.0511183	1	0.999	6.60798e-08	C1	ANTXR2
MAP2K4	7.84509e-12	0.0376996	0.998	0.998	6.64715e-08	C1	MAP2K4
KCNE3	8.01294e-12	0.074916	1	1	6.78937e-08	C1	KCNE3
ELF2	8.15617e-12	0.0515557	1	1	6.91072e-08	C1	ELF2
BRWD3	8.72881e-12	0.0656152	1	0.998	7.39592e-08	C1	BRWD3
GHRL	8.85407e-12	0.0599803	1	0.998	7.50205e-08	C1	GHRL
IFNGR2	8.99874e-12	0.0488606	1	0.999	7.62464e-08	C1	IFNGR2
TNFRSF10C	9.06972e-12	0.0819842	1	1	7.68477e-08	C1	TNFRSF10C
QKI	9.3042e-12	0.0671344	1	0.999	7.88345e-08	C1	QKI
FAH	9.41436e-12	0.0268403	0.996	0.992	7.97678e-08	C1	FAH
SERPING1	1.0804e-11	0.103344	1	1	9.15419e-08	C1	SERPING1
LRP10	1.15298e-11	0.0626793	1	1	9.76924e-08	C1	LRP10
RAB3D	1.23938e-11	0.0810043	1	0.999	1.05013e-07	C1	RAB3D
ZNF341	1.31791e-11	0.0226387	0.998	0.999	1.11666e-07	C1	ZNF341
SLC36A1	1.47186e-11	0.0606338	1	0.999	1.24711e-07	C1	SLC36A1
SEC61A2	1.64259e-11	0.0471432	1	1	1.39177e-07	C1	SEC61A2
LRPAP1	2.07505e-11	0.0657014	0.998	0.998	1.75819e-07	C1	LRPAP1
CDC42EP3	2.08006e-11	0.0798733	1	1	1.76244e-07	C1	CDC42EP3
SNX11	2.23074e-11	0.0324483	1	0.998	1.89011e-07	C1	SNX11
APAF1	2.46807e-11	0.0439847	1	0.999	2.0912e-07	C1	APAF1
ADAR	2.50634e-11	0.0440431	1	1	2.12363e-07	C1	ADAR
TCIRG1	2.5452e-11	0.0629109	1	1	2.15654e-07	C1	TCIRG1
ITGA2B	2.68329e-11	0.0718671	0.994	0.994	2.27355e-07	C1	ITGA2B
MRVI1	2.8098e-11	0.0710315	0.998	1	2.38074e-07	C1	MRVI1
FBXL5	2.8396e-11	0.0673665	1	1	2.40599e-07	C1	FBXL5
RAB24	2.96619e-11	0.0580038	1	1	2.51326e-07	C1	RAB24
CFLAR	3.08056e-11	0.0594711	1	1	2.61016e-07	C1	CFLAR
SPTLC2	3.10424e-11	0.0533755	1	1	2.63022e-07	C1	SPTLC2
GNG5	3.12511e-11	0.0488493	1	0.999	2.64791e-07	C1	GNG5
USP32	3.63614e-11	0.0744519	0.998	1	3.0809e-07	C1	USP32
SLC15A4	3.93737e-11	0.0504689	1	1	3.33613e-07	C1	SLC15A4
CEBPB	4.02646e-11	0.0541397	1	1	3.41162e-07	C1	CEBPB
TOM1	4.11361e-11	0.0549975	1	1	3.48546e-07	C1	TOM1
PTEN	4.23872e-11	0.0467559	0.998	1	3.59147e-07	C1	PTEN
TALDO1	4.35512e-11	0.0594244	1	0.998	3.6901e-07	C1	TALDO1
SPAG9	4.44289e-11	0.0495632	0.998	0.999	3.76446e-07	C1	SPAG9
PYCARD	4.77522e-11	0.042245	1	0.999	4.04604e-07	C1	PYCARD
CAMK2G	4.91998e-11	0.0359229	1	1	4.1687e-07	C1	CAMK2G
ACPP	5.00937e-11	0.0476232	1	0.998	4.24444e-07	C1	ACPP
DHTKD1	5.51706e-11	0.0461535	1	0.999	4.67461e-07	C1	DHTKD1
STAM2	5.93333e-11	0.0546415	1	0.996	5.02731e-07	C1	STAM2
RAB5C	6.16736e-11	0.0384968	1	1	5.2256e-07	C1	RAB5C
PHF20L1	6.34131e-11	0.0583046	1	0.999	5.37299e-07	C1	PHF20L1
IQSEC1	6.75121e-11	0.0486471	1	0.999	5.7203e-07	C1	IQSEC1
GBA	6.78625e-11	0.051828	1	0.999	5.74999e-07	C1	GBA
CARD8	7.88344e-11	0.0412363	1	1	6.67964e-07	C1	CARD8
LYN	8.51321e-11	0.0487464	1	0.999	7.21324e-07	C1	LYN
RNF146	8.77209e-11	0.0521722	1	0.998	7.4326e-07	C1	RNF146
OSCAR	9.77174e-11	0.0474927	0.983	0.989	8.27959e-07	C1	OSCAR
TXNRD1	1.02723e-10	0.0384297	1	0.999	8.70373e-07	C1	TXNRD1
USP15	1.07975e-10	0.0509004	1	1	9.14872e-07	C1	USP15
SP1	1.22536e-10	0.0491384	0.998	0.998	1.03825e-06	C1	SP1
DNAJC3	1.24601e-10	0.0738982	1	1	1.05575e-06	C1	DNAJC3
AOAH	1.26349e-10	0.04397	1	1	1.07055e-06	C1	AOAH
ZFP36L1	1.29254e-10	0.0588882	1	1	1.09517e-06	C1	ZFP36L1
ZDHHC3	1.29434e-10	0.047322	1	0.999	1.09669e-06	C1	ZDHHC3
SUPT4H1	1.32286e-10	0.0378598	1	0.999	1.12086e-06	C1	SUPT4H1
FAM8A1	1.35262e-10	0.0564913	1	1	1.14608e-06	C1	FAM8A1
LILRB3	1.38426e-10	0.0242014	0.983	0.99	1.17289e-06	C1	LILRB3
RAB5A	1.4174e-10	0.0464646	1	0.999	1.20096e-06	C1	RAB5A
SLC43A2	1.4763e-10	0.0482221	1	1	1.25087e-06	C1	SLC43A2
EP300	1.50803e-10	0.0450305	0.998	0.999	1.27776e-06	C1	EP300
APOL6	1.54685e-10	0.0807336	1	1	1.31065e-06	C1	APOL6
GSK3B	1.59252e-10	0.0348648	1	1	1.34934e-06	C1	GSK3B
UBE2L6	1.65165e-10	0.0530503	1	1	1.39944e-06	C1	UBE2L6
CLEC7A	1.70033e-10	0.0753591	1	1	1.44069e-06	C1	CLEC7A
CHMP2A	1.71687e-10	0.052831	1	1	1.4547e-06	C1	CHMP2A
GCA	1.80527e-10	0.0665599	1	1	1.5296e-06	C1	GCA
IFITM3	1.81861e-10	0.0755681	1	1	1.54091e-06	C1	IFITM3
TBXAS1	1.86608e-10	0.0404206	1	1	1.58113e-06	C1	TBXAS1
PAK1	1.90248e-10	0.0355918	1	1	1.61197e-06	C1	PAK1
DTX3L	2.00203e-10	0.0686759	1	0.999	1.69632e-06	C1	DTX3L
RNF141	2.12219e-10	0.0567383	1	0.998	1.79813e-06	C1	RNF141
TRIM22	2.24218e-10	0.0460158	1	1	1.8998e-06	C1	TRIM22
TOPORS	2.29411e-10	0.0471275	0.998	0.999	1.9438e-06	C1	TOPORS
SEPHS2	2.52419e-10	0.0397422	1	1	2.13874e-06	C1	SEPHS2
UBE2R2	2.56369e-10	0.0776074	1	0.999	2.17221e-06	C1	UBE2R2
ATP6V0B	2.59549e-10	0.0480665	1	1	2.19916e-06	C1	ATP6V0B
CHUK	2.65539e-10	0.0310149	1	1	2.24991e-06	C1	CHUK
SCO2	2.68218e-10	0.0335473	1	1	2.27261e-06	C1	SCO2
PIK3AP1	2.90484e-10	0.0731381	1	1	2.46127e-06	C1	PIK3AP1
ITGAX	2.91146e-10	0.0936671	1	1	2.46688e-06	C1	ITGAX
HIPK3	3.20321e-10	0.0642977	1	1	2.71408e-06	C1	HIPK3
CASC3	3.28422e-10	0.035108	1	1	2.78272e-06	C1	CASC3
NBN	3.401e-10	0.069869	1	0.999	2.88167e-06	C1	NBN
TAPBP	3.62368e-10	0.0655898	0.983	0.99	3.07034e-06	C1	TAPBP
CDKN2D	3.82435e-10	0.0436546	1	1	3.24037e-06	C1	CDKN2D
CKLF	4.00121e-10	0.0384827	1	1	3.39023e-06	C1	CKLF
VAPA	4.5646e-10	0.0727712	1	0.997	3.86759e-06	C1	VAPA
RASSF2	4.62253e-10	0.058506	1	0.999	3.91667e-06	C1	RASSF2
CAMKK2	4.72138e-10	0.0636708	1	0.999	4.00042e-06	C1	CAMKK2
FGR	4.75336e-10	0.0468037	1	1	4.02752e-06	C1	FGR
KIAA0513	4.83749e-10	0.0380371	1	1	4.09881e-06	C1	KIAA0513
ZNF429	4.91645e-10	0.0505352	0.998	0.999	4.16571e-06	C1	ZNF429
IQGAP1	5.01917e-10	0.0431614	1	1	4.25274e-06	C1	IQGAP1
DMXL2	5.02143e-10	0.0575966	1	1	4.25465e-06	C1	DMXL2
MAP3K8	5.47345e-10	0.0340346	1	0.998	4.63766e-06	C1	MAP3K8
SELPLG	5.95976e-10	0.0667481	1	1	5.04971e-06	C1	SELPLG
RGL2	6.00506e-10	0.0326596	0.983	0.99	5.08809e-06	C1	RGL2
CEP63	6.01765e-10	0.0686711	0.975	0.964	5.09875e-06	C1	CEP63
ATP11B	6.04842e-10	0.051893	1	1	5.12483e-06	C1	ATP11B
MAN2A2	6.36755e-10	0.048112	1	1	5.39522e-06	C1	MAN2A2
EVI2B	6.51137e-10	0.0510816	1	1	5.51708e-06	C1	EVI2B
BRCA1	7.11584e-10	0.030257	1	0.994	6.02925e-06	C1	BRCA1
SLC16A5	7.39699e-10	0.034778	0.998	0.998	6.26747e-06	C1	SLC16A5
IFNAR2	8.33658e-10	0.0538479	1	0.999	7.06359e-06	C1	IFNAR2
VAMP3	8.53498e-10	0.0481516	1	1	7.23169e-06	C1	VAMP3
NEDD9	8.78458e-10	0.0525438	0.998	1	7.44318e-06	C1	NEDD9
GRN	1.11232e-09	0.0532125	1	0.999	9.42469e-06	C1	GRN
CASP1	1.38812e-09	0.0515493	1	1	1.17616e-05	C1	CASP1
RAB21	1.4301e-09	0.0319135	1	1	1.21172e-05	C1	RAB21
MVP	1.6477e-09	0.0458423	1	1	1.3961e-05	C1	MVP
PXN	1.74684e-09	0.0637953	1	1	1.4801e-05	C1	PXN
RAP1A	1.87204e-09	0.0468308	0.998	1	1.58618e-05	C1	RAP1A
STX10	2.08857e-09	0.0326007	1	1	1.76964e-05	C1	STX10
GLUL	2.14547e-09	0.0746234	1	0.999	1.81786e-05	C1	GLUL
VAV1	2.18961e-09	0.0543928	1	0.999	1.85526e-05	C1	VAV1
CST7	2.49617e-09	0.0673882	1	1	2.11501e-05	C1	CST7
OS9	2.55503e-09	0.0459316	1	1	2.16488e-05	C1	OS9
SP110	2.71867e-09	0.0394891	1	1	2.30353e-05	C1	SP110
CD163	2.88133e-09	0.0444417	0.998	0.999	2.44135e-05	C1	CD163
RHOG	3.06659e-09	0.0474652	1	0.999	2.59832e-05	C1	RHOG
CREBBP	3.07978e-09	0.0441026	1	1	2.6095e-05	C1	CREBBP
YIPF4	3.29011e-09	0.0409378	1	1	2.78771e-05	C1	YIPF4
IFITM1	3.52343e-09	0.0479052	1	0.999	2.9854e-05	C1	IFITM1
TYROBP	3.67578e-09	0.0405273	0.998	1	3.11449e-05	C1	TYROBP
SAMD8	3.68837e-09	0.056755	1	0.999	3.12516e-05	C1	SAMD8
MAP3K11	3.71843e-09	0.0473234	1	0.998	3.15063e-05	C1	MAP3K11
ELOVL5	3.75034e-09	0.0468483	1	1	3.17766e-05	C1	ELOVL5
NCOA1	3.76157e-09	0.0451575	1	1	3.18718e-05	C1	NCOA1
PSMB9	3.82134e-09	0.0382006	0.983	0.99	3.23782e-05	C1	PSMB9
CARD6	3.87402e-09	0.0639426	1	1	3.28246e-05	C1	CARD6
LCP1	4.28575e-09	0.0363735	1	1	3.63132e-05	C1	LCP1
FKBP1A	4.67004e-09	0.0525174	1	1	3.95693e-05	C1	FKBP1A
ADAM8	4.94116e-09	0.0514037	1	0.999	4.18664e-05	C1	ADAM8
PLP2	5.0577e-09	0.0528166	1	1	4.28539e-05	C1	PLP2
STX12	5.76142e-09	0.0190617	1	1	4.88165e-05	C1	STX12
HSPA1A	5.83466e-09	0.038855	0.983	0.99	4.94371e-05	C1	HSPA1A
N4BP1	6.13777e-09	0.0594236	1	1	5.20053e-05	C1	N4BP1
SNX27	7.16523e-09	0.0362585	1	1	6.0711e-05	C1	SNX27
STK38L	7.20443e-09	0.0459434	0.998	0.999	6.10431e-05	C1	STK38L
UNC119	7.37877e-09	0.0385028	1	0.997	6.25203e-05	C1	UNC119
IDI1	7.5826e-09	0.0428764	1	1	6.42474e-05	C1	IDI1
POLB	7.6368e-09	0.0292618	1	1	6.47066e-05	C1	POLB
ARNTL	7.66244e-09	0.0357411	1	0.998	6.49239e-05	C1	ARNTL
SERTAD3	8.25503e-09	0.0491247	1	0.998	6.99449e-05	C1	SERTAD3
AKAP13	8.40825e-09	0.0337916	1	1	7.12431e-05	C1	AKAP13
TK2	8.81083e-09	0.0369057	1	0.999	7.46542e-05	C1	TK2
IFIT3	9.35606e-09	0.0645256	1	1	7.92739e-05	C1	IFIT3
TAP2	9.58851e-09	0.0464293	0.983	0.988	8.12434e-05	C1	TAP2
WDR26	9.66897e-09	0.0395915	1	0.999	8.19252e-05	C1	WDR26
TPCN2	1.00462e-08	0.0378006	1	1	8.51214e-05	C1	TPCN2
SAMD9L	1.00504e-08	0.0579417	1	0.998	8.51568e-05	C1	SAMD9L
C3AR1	1.0516e-08	0.044164	1	1	8.91023e-05	C1	C3AR1
PPFIA1	1.05817e-08	0.0369826	1	1	8.9659e-05	C1	PPFIA1
PRCP	1.08982e-08	0.0408947	1	0.999	9.23401e-05	C1	PRCP
EMILIN2	1.19579e-08	0.0373318	1	1	0.00010132	C1	EMILIN2
BCL10	1.2299e-08	0.0396735	0.998	0.999	0.00010421	C1	BCL10
RTN4	1.29455e-08	0.039458	1	1	0.000109687	C1	RTN4
PSEN1	1.42389e-08	0.054232	1	1	0.000120646	C1	PSEN1
VAV3	1.61934e-08	0.0477054	1	0.999	0.000137206	C1	VAV3
NMI	1.6367e-08	0.0433564	1	1	0.000138677	C1	NMI
DDX58	1.6975e-08	0.0565063	1	1	0.000143829	C1	DDX58
NIN	1.72271e-08	0.0387261	1	1	0.000145965	C1	NIN
S100P	1.73403e-08	0.0792772	0.998	0.994	0.000146925	C1	S100P
S100A8	1.86954e-08	0.056372	1	1	0.000158406	C1	S100A8
ZC3H12A	1.88411e-08	0.0485024	0.996	0.996	0.00015964	C1	ZC3H12A
TBL1X	2.00302e-08	0.0356447	1	1	0.000169716	C1	TBL1X
NEU1	2.04253e-08	0.0268474	0.983	0.99	0.000173064	C1	NEU1
GMFG	2.05679e-08	0.034292	1	1	0.000174272	C1	GMFG
CASP8	2.12143e-08	0.0534902	1	1	0.000179749	C1	CASP8
KIAA1324	2.15273e-08	0.073432	0.996	0.996	0.000182401	C1	KIAA1324
ZDHHC17	2.39446e-08	0.0171022	1	1	0.000202882	C1	ZDHHC17
SPTLC1	2.40809e-08	0.0278539	1	1	0.000204038	C1	SPTLC1
LILRA2	2.44738e-08	0.0500102	0.983	0.989	0.000207367	C1	LILRA2
ATXN1	2.45739e-08	0.0421636	0.998	0.999	0.000208215	C1	ATXN1
USP3	2.71459e-08	0.023314	1	1	0.000230008	C1	USP3
ABHD3	2.72118e-08	0.0384964	1	0.999	0.000230566	C1	ABHD3
MANBA	2.80034e-08	0.0255081	1	1	0.000237272	C1	MANBA
MAP1LC3B	3.00267e-08	0.020389	1	0.999	0.000254416	C1	MAP1LC3B
PARP14	3.26476e-08	0.0590284	1	0.998	0.000276623	C1	PARP14
MFN2	3.37001e-08	0.0361127	1	1	0.000285541	C1	MFN2
CORO1C	3.58616e-08	0.0443061	1	0.999	0.000303855	C1	CORO1C
KLF7	3.68517e-08	0.0614178	1	0.998	0.000312244	C1	KLF7
TRPM2	3.78532e-08	0.0557219	0.998	0.997	0.00032073	C1	TRPM2
CYP27A1	3.96499e-08	0.0555693	0.998	0.999	0.000335953	C1	CYP27A1
YTHDF3	4.00478e-08	0.030232	0.998	0.999	0.000339325	C1	YTHDF3
ARID5A	4.21129e-08	0.0562158	1	1	0.000356823	C1	ARID5A
RYBP	4.41403e-08	0.0320125	1	1	0.000374001	C1	RYBP
GALK1	5.12313e-08	0.0214567	0.994	0.999	0.000434083	C1	GALK1
IDH1	5.2153e-08	0.0279147	1	1	0.000441892	C1	IDH1
NECAP1	5.30698e-08	0.0249761	1	0.999	0.00044966	C1	NECAP1
AGPAT2	5.46037e-08	0.0509335	0.998	0.997	0.000462658	C1	AGPAT2
CDH23	5.61141e-08	0.0403042	1	1	0.000475455	C1	CDH23
PIK3CG	5.64924e-08	0.0384991	1	0.999	0.00047866	C1	PIK3CG
RAB27A	5.85828e-08	0.0549462	1	0.999	0.000496372	C1	RAB27A
BMP2K	5.87681e-08	0.0423854	1	1	0.000497942	C1	BMP2K
PGM1	6.19084e-08	0.00685299	1	0.998	0.00052455	C1	PGM1
SEC24D	6.53394e-08	0.0461318	1	1	0.000553621	C1	SEC24D
ACAA1	6.86571e-08	0.0268728	1	1	0.000581731	C1	ACAA1
RGS19	7.05978e-08	0.0421481	1	1	0.000598175	C1	RGS19
SNN	7.24211e-08	0.0412509	1	1	0.000613624	C1	SNN
MME	7.29054e-08	0.094213	1	0.998	0.000617728	C1	MME
MLF2	7.46108e-08	0.0424193	1	0.999	0.000632177	C1	MLF2
TRIM5	7.46693e-08	0.0407015	1	1	0.000632673	C1	TRIM5
CDC42SE1	7.59671e-08	0.0498951	1	1	0.00064367	C1	CDC42SE1
G6PD	7.61756e-08	0.0483222	1	0.998	0.000645436	C1	G6PD
DPYD	7.75595e-08	0.0504988	1	0.999	0.000657162	C1	DPYD
VCPIP1	7.7894e-08	0.0374193	1	1	0.000659996	C1	VCPIP1
JMJD1C	7.81076e-08	0.0510934	1	0.999	0.000661806	C1	JMJD1C
MKNK2	7.89368e-08	0.0408055	1	1	0.000668832	C1	MKNK2
VDR	8.16034e-08	0.0556044	0.998	0.997	0.000691426	C1	VDR
GSR	8.18908e-08	0.0412235	1	0.999	0.000693861	C1	GSR
AP1G1	8.58176e-08	0.0364415	1	0.999	0.000727133	C1	AP1G1
ST6GALNAC3	1.01364e-07	0.0426951	0.987	0.978	0.000858854	C1	ST6GALNAC3
GBP5	1.04153e-07	0.0647395	1	1	0.000882487	C1	GBP5
RETN	1.06685e-07	0.0640643	0.998	0.998	0.000903944	C1	RETN
TRIM33	1.08267e-07	0.0281096	1	1	0.000917344	C1	TRIM33
LBR	1.10896e-07	0.0489437	1	1	0.000939621	C1	LBR
UBQLN2	1.15579e-07	0.0349384	0.998	1	0.000979302	C1	UBQLN2
IMPDH1	1.20036e-07	0.0534543	1	1	0.00101707	C1	IMPDH1
GSN	1.21621e-07	0.0645167	1	0.999	0.00103049	C1	GSN
TFEB	1.2195e-07	0.056702	0.998	0.996	0.00103328	C1	TFEB
GALC	1.22799e-07	0.0341172	1	0.999	0.00104048	C1	GALC
TAGLN2	1.35309e-07	0.052588	1	0.998	0.00114647	C1	TAGLN2
MARK2	1.45938e-07	0.062658	1	0.998	0.00123653	C1	MARK2
MPZL1	1.46499e-07	0.0703376	0.998	0.999	0.00124128	C1	MPZL1
EPSTI1	1.5129e-07	0.0383889	1	1	0.00128188	C1	EPSTI1
FHOD1	1.51696e-07	0.0310252	1	0.997	0.00128532	C1	FHOD1
ICAM3	1.55458e-07	0.0392897	1	1	0.0013172	C1	ICAM3
C1QB	1.55875e-07	0.0710621	0.996	0.996	0.00132073	C1	C1QB
NUP214	1.60472e-07	0.0317402	1	1	0.00135968	C1	NUP214
AHCTF1	1.75662e-07	0.04537	1	0.999	0.00148839	C1	AHCTF1
GPSM3	1.79172e-07	0.0316803	0.983	0.99	0.00151813	C1	GPSM3
USP4	1.82759e-07	0.0322365	1	1	0.00154852	C1	USP4
TNFAIP8L2	1.84015e-07	0.03056	1	0.999	0.00155916	C1	TNFAIP8L2
ZNF143	1.98244e-07	0.0257258	1	0.999	0.00167972	C1	ZNF143
MAX	2.17942e-07	0.0427067	1	0.999	0.00184662	C1	MAX
CD300LF	2.23281e-07	0.0310026	1	0.999	0.00189186	C1	CD300LF
OSTM1	2.30481e-07	0.0307267	1	0.999	0.00195286	C1	OSTM1
FURIN	2.3144e-07	0.0591795	1	1	0.00196099	C1	FURIN
IRF1	2.38714e-07	0.053491	1	1	0.00202262	C1	IRF1
PLEKHB2	2.64158e-07	0.0350978	1	1	0.00223821	C1	PLEKHB2
SOAT1	2.77062e-07	0.0403572	1	1	0.00234755	C1	SOAT1
CTDSPL	3.01547e-07	0.0340648	0.994	0.999	0.00255501	C1	CTDSPL
ASAH1	3.14443e-07	0.0430878	1	1	0.00266427	C1	ASAH1
GPR155	3.19653e-07	0.0562998	0.998	0.998	0.00270842	C1	GPR155
RCN3	3.23253e-07	0.0472439	0.998	1	0.00273893	C1	RCN3
LSP1	3.26893e-07	0.060639	1	0.999	0.00276976	C1	LSP1
ASB7	3.32798e-07	0.0388808	0.998	0.997	0.0028198	C1	ASB7
SIPA1	3.60404e-07	0.0331806	1	1	0.0030537	C1	SIPA1
ZDHHC12	3.62689e-07	0.0459066	1	0.997	0.00307306	C1	ZDHHC12
DHRS7	3.64446e-07	0.0325473	1	1	0.00308795	C1	DHRS7
LYPLA1	3.64446e-07	0.0281754	1	0.999	0.00308795	C1	LYPLA1
MRPL44	3.70592e-07	0.037231	1	1	0.00314002	C1	MRPL44
IFI30	3.89201e-07	0.0441839	1	0.999	0.0032977	C1	IFI30
PLEK	3.89346e-07	0.0398925	1	1	0.00329893	C1	PLEK
KIF5B	3.99729e-07	0.0398341	1	0.999	0.0033869	C1	KIF5B
TAP1	4.04485e-07	0.0483574	0.983	0.989	0.00342721	C1	TAP1
DTX2	4.39593e-07	0.0441034	0.998	0.999	0.00372467	C1	DTX2
KLHL5	4.44325e-07	0.02123	1	1	0.00376477	C1	KLHL5
PDE4B	4.56624e-07	0.0458748	1	1	0.00386897	C1	PDE4B
SYK	4.58311e-07	0.0320572	1	1	0.00388327	C1	SYK
MGAM	4.60852e-07	0.102504	1	0.999	0.0039048	C1	MGAM
WWP2	4.84526e-07	0.0593925	1	0.999	0.00410539	C1	WWP2
FAM49B	5.11621e-07	0.0482818	1	1	0.00433496	C1	FAM49B
AGTPBP1	5.44348e-07	0.042729	1	0.999	0.00461226	C1	AGTPBP1
LILRB2	5.46533e-07	0.0539465	0.983	0.99	0.00463078	C1	LILRB2
HMGCR	5.50969e-07	0.0251418	1	0.999	0.00466836	C1	HMGCR
NFE2	5.6901e-07	0.0430045	1	1	0.00482122	C1	NFE2
XRN2	5.9627e-07	0.041165	1	0.999	0.00505219	C1	XRN2
PIK3R5	6.393e-07	0.0546028	1	1	0.00541679	C1	PIK3R5
PAK2	6.52949e-07	0.043239	1	1	0.00553244	C1	PAK2
TGOLN2	6.89814e-07	0.0311879	1	1	0.00584479	C1	TGOLN2
PIGB	6.92325e-07	0.0287991	1	0.998	0.00586607	C1	PIGB
TST	7.00673e-07	0.0171053	0.996	0.997	0.0059368	C1	TST
CUL4B	7.36115e-07	0.0336325	1	1	0.0062371	C1	CUL4B
KRT23	7.44432e-07	0.066737	1	0.999	0.00630757	C1	KRT23
CTSS	7.45241e-07	0.0464791	1	1	0.00631443	C1	CTSS
EVI2A	7.92534e-07	0.0475637	1	0.999	0.00671514	C1	EVI2A
KLF6	8.1137e-07	0.0448135	1	1	0.00687474	C1	KLF6
TTLL4	8.27943e-07	0.0448322	1	0.997	0.00701516	C1	TTLL4
STK17B	8.29738e-07	0.0411413	1	1	0.00703037	C1	STK17B
ARRDC3	8.3394e-07	0.0557107	1	0.999	0.00706598	C1	ARRDC3
DGCR2	8.45756e-07	0.0396175	1	1	0.00716609	C1	DGCR2
SMPDL3A	8.705e-07	0.0333603	1	1	0.00737575	C1	SMPDL3A
LAPTM5	9.21102e-07	0.0435485	1	0.999	0.0078045	C1	LAPTM5
LMO2	9.32092e-07	0.0374145	1	1	0.00789762	C1	LMO2
NME6	9.41855e-07	0.0162148	1	0.999	0.00798034	C1	NME6
RRAGC	1.00938e-06	0.0197031	1	0.998	0.00855246	C1	RRAGC
NINJ1	1.05746e-06	0.0450757	1	0.999	0.00895987	C1	NINJ1
TRIM8	1.08892e-06	0.0328169	1	0.998	0.00922639	C1	TRIM8
TNFRSF1B	1.10933e-06	0.0369876	1	1	0.00939934	C1	TNFRSF1B
UNC13D	1.15496e-06	0.0411774	1	0.999	0.009786	C1	UNC13D
PSME1	1.15496e-06	0.0345097	1	1	0.009786	C1	PSME1
ALOX5	1.15867e-06	0.0737042	1	0.998	0.00981744	C1	ALOX5
PSENEN	1.2054e-06	0.0557891	1	1	0.0102133	C1	PSENEN
EGF	1.22921e-06	0.0606286	0.973	0.955	0.0104151	C1	EGF
TOR1AIP1	1.22965e-06	0.0303236	1	1	0.0104189	C1	TOR1AIP1
KCMF1	1.28231e-06	0.0414925	1	0.999	0.010865	C1	KCMF1
CDC42	1.29282e-06	0.043169	1	1	0.0109541	C1	CDC42
IFITM2	1.35911e-06	0.0496656	1	1	0.0115157	C1	IFITM2
IER2	1.37314e-06	0.0461827	1	0.999	0.0116346	C1	IER2
ASB8	1.40759e-06	0.0260152	1	0.999	0.0119265	C1	ASB8
RIPK2	1.41358e-06	0.0149196	1	1	0.0119773	C1	RIPK2
ARIH1	1.49158e-06	0.0354217	1	1	0.0126382	C1	ARIH1
PSMB8	1.58816e-06	0.0286605	0.983	0.99	0.0134565	C1	PSMB8
TM9SF2	1.64798e-06	0.0217498	1	1	0.0139633	C1	TM9SF2
CYBA	1.85546e-06	0.0192049	0.998	1	0.0157213	C1	CYBA
TOR1B	1.86262e-06	0.0427762	1	0.998	0.015782	C1	TOR1B
SERPINB8	1.88096e-06	0.0201673	0.998	0.998	0.0159374	C1	SERPINB8
DAZAP2	1.89483e-06	0.0378432	1	0.999	0.0160549	C1	DAZAP2
STX7	1.90546e-06	0.0355413	1	1	0.016145	C1	STX7
ANP32A	1.92622e-06	0.0584235	1	1	0.0163209	C1	ANP32A
PHC2	1.95333e-06	0.0841683	1	1	0.0165506	C1	PHC2
RIPK3	2.04971e-06	0.026763	0.998	0.999	0.0173672	C1	RIPK3
MEF2A	2.07632e-06	0.061345	1	0.999	0.0175926	C1	MEF2A
NFYC	2.07704e-06	0.0341888	0.998	0.998	0.0175988	C1	NFYC
GNA13	2.09084e-06	0.0309065	1	1	0.0177157	C1	GNA13
APP	2.11796e-06	0.0595363	1	0.998	0.0179454	C1	APP
MICB	2.1216e-06	0.0199851	0.983	0.99	0.0179763	C1	MICB
ABHD4	2.18838e-06	0.0410769	0.99	0.994	0.0185421	C1	ABHD4
SLC39A1	2.22212e-06	0.0349163	1	1	0.018828	C1	SLC39A1
GAS6	2.22366e-06	0.0350016	1	0.999	0.0188411	C1	GAS6
UBE2B	2.29746e-06	0.0533964	1	0.999	0.0194663	C1	UBE2B
GLRX	2.64592e-06	0.0277964	0.998	1	0.0224188	C1	GLRX
PPIF	2.71526e-06	0.0592705	1	0.997	0.0230064	C1	PPIF
NANS	2.72746e-06	0.0157778	1	0.999	0.0231098	C1	NANS
TBK1	2.75866e-06	0.0153475	1	1	0.0233741	C1	TBK1
TNFAIP2	2.89386e-06	0.0569203	1	1	0.0245196	C1	TNFAIP2
STAT6	3.20656e-06	0.032037	1	1	0.0271692	C1	STAT6
JAK3	3.26192e-06	0.0708427	1	1	0.0276382	C1	JAK3
SNX6	3.30347e-06	0.0322537	1	1	0.0279903	C1	SNX6
CD14	3.51537e-06	0.0446069	1	1	0.0297858	C1	CD14
SMNDC1	3.53703e-06	0.0222082	1	1	0.0299692	C1	SMNDC1
PPBP	4.23358e-06	0.0494104	1	1	0.0358711	C1	PPBP
SCPEP1	4.28983e-06	0.0284768	1	0.999	0.0363478	C1	SCPEP1
ELMOD2	4.2971e-06	0.0236872	1	0.999	0.0364093	C1	ELMOD2
TLN1	4.35121e-06	0.051141	1	0.999	0.0368678	C1	TLN1
PAM	4.39854e-06	0.0230895	1	1	0.0372689	C1	PAM
CCNL1	4.54198e-06	0.0316105	1	1	0.0384842	C1	CCNL1
GALNT3	4.58974e-06	0.0294032	0.998	1	0.0388889	C1	GALNT3
RAB6B	4.95948e-06	0.040682	0.998	0.997	0.0420217	C1	RAB6B
CHMP1B	5.46095e-06	0.0418419	1	0.998	0.0462706	C1	CHMP1B
DECR1	5.47743e-06	0.0124634	0.998	0.999	0.0464103	C1	DECR1
FADD	5.51608e-06	0.0273964	1	0.999	0.0467378	C1	FADD
CTSZ	5.7593e-06	0.0441224	0.998	0.999	0.0487985	C1	CTSZ
TLK2	5.80179e-06	0.021451	1	0.998	0.0491585	C1	TLK2
RAP2C	5.92315e-06	0.036062	1	0.999	0.0501869	C1	RAP2C
CD151	6.10977e-06	0.0529826	1	0.999	0.051768	C1	CD151
CD300C	6.26852e-06	0.0200449	0.998	0.997	0.0531131	C1	CD300C
TOLLIP	6.73296e-06	0.0350569	1	1	0.0570484	C1	TOLLIP
DICER1	6.75534e-06	0.0536068	1	0.999	0.057238	C1	DICER1
CINP	6.93929e-06	0.0358432	1	0.998	0.0587966	C1	CINP
SERTAD1	7.61279e-06	0.0144058	1	0.999	0.0645032	C1	SERTAD1
KIDINS220	7.63041e-06	0.0316712	1	1	0.0646524	C1	KIDINS220
APLP2	7.69109e-06	0.0474533	1	1	0.0651666	C1	APLP2
ILK	8.04643e-06	0.0436562	1	0.999	0.0681774	C1	ILK
RGS2	8.11561e-06	0.0495629	1	0.999	0.0687636	C1	RGS2
YWHAZ	8.44791e-06	0.0320962	1	1	0.0715792	C1	YWHAZ
SLC8A1	8.71564e-06	0.0547711	1	0.999	0.0738476	C1	SLC8A1
GCH1	9.13697e-06	0.047122	1	0.999	0.0774175	C1	GCH1
SLC25A20	9.3518e-06	0.020971	1	1	0.0792378	C1	SLC25A20
PNRC1	9.7641e-06	0.0585159	1	0.999	0.0827312	C1	PNRC1
ENTPD4	9.8377e-06	0.0376916	1	0.998	0.0833548	C1	ENTPD4
DOCK8	9.96045e-06	0.0349465	1	1	0.0843949	C1	DOCK8
RXRA	1.00191e-05	0.0286626	1	1	0.0848919	C1	RXRA
VAMP5	1.02838e-05	0.0285228	1	0.999	0.0871347	C1	VAMP5
CHMP5	1.05655e-05	0.0303479	1	1	0.0895214	C1	CHMP5
RAB35	1.05827e-05	0.0322967	0.998	0.997	0.0896671	C1	RAB35
CTNNA1	1.05827e-05	0.0289543	1	1	0.0896671	C1	CTNNA1
COPB2	1.09218e-05	0.0313216	1	0.998	0.09254	C1	COPB2
NIT1	1.13445e-05	0.0495689	0.998	0.999	0.0961222	C1	NIT1
YIPF3	1.17829e-05	0.0385408	1	0.998	0.0998365	C1	YIPF3
GDI1	1.21389e-05	0.026205	1	0.998	0.102853	C1	GDI1
PLOD1	1.26636e-05	0.0404452	1	0.998	0.107299	C1	PLOD1
BCKDK	1.28986e-05	0.0355638	1	0.994	0.10929	C1	BCKDK
NFAT5	1.31589e-05	0.0433881	1	1	0.111496	C1	NFAT5
EPS15L1	1.33124e-05	0.0481485	1	0.999	0.112796	C1	EPS15L1
WAC	1.3585e-05	0.0247439	1	1	0.115106	C1	WAC
DYRK1A	1.41146e-05	0.0342337	1	1	0.119593	C1	DYRK1A
HPCAL1	1.49533e-05	0.0547204	1	0.998	0.126699	C1	HPCAL1
RPS6KA1	1.53755e-05	0.0395693	1	1	0.130277	C1	RPS6KA1
PRKACA	1.56383e-05	0.0599209	1	1	0.132503	C1	PRKACA
CAP1	1.59969e-05	0.035747	1	0.999	0.135542	C1	CAP1
USP9X	1.6156e-05	0.0277379	1	1	0.13689	C1	USP9X
RIPK1	1.68128e-05	0.0261252	1	0.999	0.142455	C1	RIPK1
FLII	1.68772e-05	0.0315767	1	1	0.143	C1	FLII
NUP98	1.7991e-05	0.0453744	1	1	0.152438	C1	NUP98
MNT	1.81113e-05	0.0295998	1	0.999	0.153457	C1	MNT
BAG4	1.83834e-05	0.0161929	1	1	0.155763	C1	BAG4
PRKAR2A	1.86298e-05	0.0302495	1	0.999	0.157851	C1	PRKAR2A
C2	1.88552e-05	0.0379433	0.975	0.982	0.15976	C1	C2
EHD1	1.88794e-05	0.0241829	1	1	0.159965	C1	EHD1
F13A1	1.91807e-05	0.0436172	0.996	0.999	0.162518	C1	F13A1
CMIP	1.97658e-05	0.0375481	1	1	0.167475	C1	CMIP
OAT	2.10071e-05	0.0269972	1	1	0.177993	C1	OAT
LIMK1	2.26687e-05	0.069305	1	0.998	0.192072	C1	LIMK1
PML	2.27757e-05	0.0703199	1	0.998	0.192979	C1	PML
S100A9	2.66804e-05	0.0524842	1	1	0.226063	C1	S100A9
DNM2	2.89804e-05	0.0461893	1	0.998	0.245551	C1	DNM2
CAPZA2	2.92604e-05	0.0272851	1	1	0.247923	C1	CAPZA2
BIN2	2.93786e-05	0.046695	1	1	0.248925	C1	BIN2
LCN2	3.12743e-05	0.0526593	1	0.999	0.264987	C1	LCN2
PINK1	3.17317e-05	0.0370049	1	1	0.268863	C1	PINK1
SEC14L1	3.18397e-05	0.0411911	1	1	0.269778	C1	SEC14L1
RB1CC1	3.21161e-05	0.0195466	1	1	0.27212	C1	RB1CC1
PPP3CA	3.21558e-05	0.0298728	1	1	0.272456	C1	PPP3CA
PAG1	3.22055e-05	0.0321187	1	1	0.272877	C1	PAG1
RAC2	3.26456e-05	0.0350397	1	1	0.276606	C1	RAC2
LAPTM4A	3.70879e-05	0.04031	1	1	0.314246	C1	LAPTM4A
WDR1	3.76834e-05	0.0247372	1	0.999	0.319292	C1	WDR1
MLX	3.88304e-05	0.0180487	1	1	0.32901	C1	MLX
BICD2	3.97548e-05	0.0242982	1	1	0.336842	C1	BICD2
ZDHHC20	3.98399e-05	0.0254705	1	0.998	0.337563	C1	ZDHHC20
LMAN2	4.00349e-05	0.0330887	1	1	0.339216	C1	LMAN2
PHKA2	4.15145e-05	0.0203743	1	1	0.351753	C1	PHKA2
OASL	4.17937e-05	0.0454429	1	1	0.354118	C1	OASL
LCAT	4.24606e-05	0.0281731	0.998	1	0.359769	C1	LCAT
F11R	4.6313e-05	0.0577235	1	1	0.39241	C1	F11R
STAT1	4.64113e-05	0.0400123	1	1	0.393243	C1	STAT1
HOOK3	4.67075e-05	0.0222818	0.998	1	0.395752	C1	HOOK3
TMEM59	4.8979e-05	0.0263589	1	0.999	0.414999	C1	TMEM59
RAD23B	4.98895e-05	0.0385534	0.998	1	0.422714	C1	RAD23B
ARF3	5.03128e-05	0.0381896	0.998	0.999	0.4263	C1	ARF3
CLK4	5.1185e-05	0.0304285	1	0.999	0.433691	C1	CLK4
SERAC1	5.25915e-05	0.0127979	0.998	0.998	0.445607	C1	SERAC1
CHD1	5.28453e-05	0.025455	1	1	0.447758	C1	CHD1
B4GALT1	5.47371e-05	0.0280275	1	1	0.463787	C1	B4GALT1
PPM1M	5.47371e-05	0.0205799	1	1	0.463787	C1	PPM1M
CAMTA2	5.64724e-05	0.0515551	1	0.997	0.478491	C1	CAMTA2
ELF4	5.78252e-05	0.0256939	1	0.999	0.489953	C1	ELF4
ITGB2	5.8016e-05	0.031303	1	1	0.49157	C1	ITGB2
SLC30A1	5.83994e-05	0.0184697	1	0.998	0.494818	C1	SLC30A1
JAM3	6.08958e-05	0.0305739	0.998	1	0.51597	C1	JAM3
ARPC5	6.12788e-05	0.0362843	1	1	0.519215	C1	ARPC5
GLTP	6.19039e-05	0.0157195	1	1	0.524511	C1	GLTP
USP8	6.25722e-05	0.0308014	1	0.999	0.530175	C1	USP8
PRKAG1	6.31344e-05	0.0164606	1	1	0.534938	C1	PRKAG1
TOP3A	6.32852e-05	0.0259153	1	1	0.536215	C1	TOP3A
SLC35B3	6.43881e-05	0.0161302	1	0.998	0.545561	C1	SLC35B3
TP53INP1	6.44649e-05	0.0180913	1	1	0.546211	C1	TP53INP1
ADPGK	6.63327e-05	0.0245806	1	1	0.562037	C1	ADPGK
SCYL3	6.69666e-05	0.028299	0.998	0.996	0.567408	C1	SCYL3
TAGAP	6.78677e-05	0.033706	1	1	0.575043	C1	TAGAP
GTPBP2	6.89233e-05	0.030499	1	1	0.583987	C1	GTPBP2
SPARC	7.00567e-05	0.066293	1	1	0.59359	C1	SPARC
THRAP3	7.09971e-05	0.0429826	1	0.998	0.601558	C1	THRAP3
PTP4A1	7.13132e-05	0.0258363	1	0.999	0.604237	C1	PTP4A1
TSPAN2	7.20773e-05	0.0365005	1	1	0.610711	C1	TSPAN2
ZNF354A	7.55457e-05	0.0242842	1	1	0.640099	C1	ZNF354A
PSTPIP1	7.60603e-05	0.0274475	0.998	0.999	0.644459	C1	PSTPIP1
OGFR	7.70767e-05	0.0333605	1	0.998	0.653071	C1	OGFR
VIM	7.83134e-05	0.0323001	1	0.999	0.66355	C1	VIM
DNAJB6	7.90085e-05	0.0257512	1	0.999	0.669439	C1	DNAJB6
ANKRD13D	7.93583e-05	0.0405205	1	0.999	0.672403	C1	ANKRD13D
ZNF333	8.18237e-05	0.034023	1	0.998	0.693292	C1	ZNF333
YIF1B	8.34992e-05	0.0296785	0.996	0.994	0.707489	C1	YIF1B
ZNF217	8.40155e-05	0.0217549	1	1	0.711863	C1	ZNF217
CLIC1	8.49812e-05	0.0157638	0.983	0.989	0.720045	C1	CLIC1
CAMP	8.81271e-05	0.0505979	0.998	0.999	0.746701	C1	CAMP
TAPBPL	8.96354e-05	0.0377539	1	0.999	0.759481	C1	TAPBPL
C1GALT1	9.18631e-05	0.0291756	1	0.999	0.778356	C1	C1GALT1
CORO1A	9.23742e-05	0.0289792	1	1	0.782687	C1	CORO1A
PRKD2	9.4253e-05	0.0372835	1	1	0.798606	C1	PRKD2
GAA	9.80052e-05	0.0347346	1	1	0.830398	C1	GAA
DDX3X	0.000100955	0.0371557	1	1	0.855395	C1	DDX3X
CDIPT	0.000105111	0.02973	1	0.999	0.890605	C1	CDIPT
HM13	0.000107078	0.0442602	1	0.999	0.907272	C1	HM13
DTNBP1	0.000107233	0.0361966	1	0.996	0.908587	C1	DTNBP1
HSPA1L	0.000110571	0.0161635	0.983	0.989	0.936866	C1	HSPA1L
UBE2J1	0.00011131	0.0366836	1	1	0.943128	C1	UBE2J1
PGRMC1	0.000111987	0.0160069	1	0.999	0.948867	C1	PGRMC1
UBE2D1	0.000112084	0.0647685	1	1	0.949689	C1	UBE2D1
LYST	0.000112408	0.0504786	1	0.999	0.952436	C1	LYST
ROCK1	0.000113517	0.038631	1	0.999	0.961831	C1	ROCK1
CD36	0.000117785	0.0257002	1	0.998	0.997988	C1	CD36
SLC31A2	0.000120009	0.0164797	1	1	1	C1	SLC31A2
SLMAP	0.000125403	0.0193875	1	0.997	1	C1	SLMAP
U2AF1	0.000127653	0.0328382	0.996	0.999	1	C1	U2AF1
DGKG	0.000134556	0.0182631	0.992	0.997	1	C1	DGKG
WDFY1	0.000137078	0.0293992	1	0.998	1	C1	WDFY1
STS	0.000138375	0.0343924	0.996	0.994	1	C1	STS
PTPN1	0.000139445	0.0253921	1	0.999	1	C1	PTPN1
FEZ2	0.000139963	0.0136309	1	1	1	C1	FEZ2
BACH1	0.000140844	0.056009	1	0.999	1	C1	BACH1
TNFRSF10B	0.00014258	0.0299351	1	0.999	1	C1	TNFRSF10B
MED8	0.000144131	0.021531	1	1	1	C1	MED8
FGFR1OP2	0.000147659	0.0237818	1	0.999	1	C1	FGFR1OP2
BRD8	0.000150711	0.020581	1	0.999	1	C1	BRD8
ACTR3	0.000152129	0.0248714	1	0.999	1	C1	ACTR3
FGFR1OP	0.000155047	0.0228834	1	1	1	C1	FGFR1OP
COTL1	0.000170543	0.043947	1	0.999	1	C1	COTL1
RNF31	0.000172039	0.01402	1	1	1	C1	RNF31
TAF7	0.000172039	0.0297045	1	1	1	C1	TAF7
SDHC	0.000172379	0.0284127	1	1	1	C1	SDHC
GABARAPL2	0.000172476	0.0238048	1	1	1	C1	GABARAPL2
PPT1	0.000172865	0.0419528	1	0.999	1	C1	PPT1
COX15	0.000177649	0.0360847	1	0.998	1	C1	COX15
OSBPL9	0.000179103	0.0229163	0.998	0.999	1	C1	OSBPL9
PLCG2	0.000179456	0.0261614	1	1	1	C1	PLCG2
CCNDBP1	0.000181688	0.0368473	1	1	1	C1	CCNDBP1
STAB1	0.000194545	0.0377583	0.998	1	1	C1	STAB1
YME1L1	0.000202926	0.00885762	1	1	1	C1	YME1L1
CREG1	0.000210118	0.030415	1	0.999	1	C1	CREG1
MBP	0.000213596	0.0373188	1	0.998	1	C1	MBP
LEPROT	0.000231104	0.0166835	1	1	1	C1	LEPROT
TCF7L2	0.00023647	0.0253983	1	1	1	C1	TCF7L2
PLEKHM1	0.00023686	0.0189927	0.983	0.99	1	C1	PLEKHM1
MYO9B	0.000247214	0.0382519	1	0.998	1	C1	MYO9B
ZDHHC5	0.000248717	0.0148349	0.998	0.998	1	C1	ZDHHC5
RAB8B	0.000256291	0.0252488	0.998	1	1	C1	RAB8B
ARL3	0.000256291	0.0147532	1	0.999	1	C1	ARL3
LTA4H	0.000258272	0.0320405	1	1	1	C1	LTA4H
SLC38A2	0.000259339	0.025466	1	1	1	C1	SLC38A2
ZBP1	0.000262348	0.0292579	1	1	1	C1	ZBP1
GORASP1	0.000263503	0.0255352	1	0.998	1	C1	GORASP1
NSMAF	0.00026685	0.0127369	1	1	1	C1	NSMAF
YWHAB	0.000268685	0.0323981	1	0.999	1	C1	YWHAB
PIK3C3	0.000269866	0.0246259	1	0.999	1	C1	PIK3C3
GRK6	0.000276449	0.0359663	1	0.999	1	C1	GRK6
BRAF	0.000283183	0.0285386	0.996	0.998	1	C1	BRAF
UBE2A	0.000286216	0.0229557	1	0.998	1	C1	UBE2A
SNX1	0.000289674	0.0309672	1	1	1	C1	SNX1
NUP50	0.000302748	0.0425989	1	0.999	1	C1	NUP50
S100A6	0.000303325	0.0232548	1	1	1	C1	S100A6
DPEP3	0.000339352	0.0150999	0.994	0.991	1	C1	DPEP3
IL15	0.000342205	0.0308575	0.998	0.996	1	C1	IL15
PPP2R5A	0.000345174	0.0183603	1	1	1	C1	PPP2R5A
PHF2	0.000352036	0.0136914	1	0.999	1	C1	PHF2
PDK1	0.000368217	0.033735	1	0.998	1	C1	PDK1
CHD2	0.000396068	0.0405203	1	0.999	1	C1	CHD2
ARPC4	0.000396385	0.034706	1	0.999	1	C1	ARPC4
PLK3	0.000412476	0.0261139	0.998	0.999	1	C1	PLK3
CPT1A	0.000418123	0.0347075	1	0.999	1	C1	CPT1A
CTSC	0.00041868	0.0275352	1	1	1	C1	CTSC
SIL1	0.00042294	0.0141902	0.996	0.999	1	C1	SIL1
SGTB	0.000424858	0.0326601	1	0.999	1	C1	SGTB
FGD3	0.000427353	0.0289803	1	1	1	C1	FGD3
COL7A1	0.000431922	0.0312305	0.973	0.939	1	C1	COL7A1
PARVG	0.000439333	0.0340731	1	0.998	1	C1	PARVG
IREB2	0.000446386	0.025501	1	0.999	1	C1	IREB2
CTDSP1	0.000450072	0.035731	1	1	1	C1	CTDSP1
AMD1	0.000451866	0.020448	1	1	1	C1	AMD1
CLEC2B	0.000452825	0.0186171	1	1	1	C1	CLEC2B
PSAP	0.00047819	0.0257187	1	1	1	C1	PSAP
GATAD2A	0.000489425	0.0256991	1	1	1	C1	GATAD2A
HLA-F	0.000495389	0.0234603	0.983	0.99	1	C1	HLA-F
MARK3	0.000505674	0.0263463	1	0.998	1	C1	MARK3
GGA3	0.000519825	0.0208047	1	1	1	C1	GGA3
ZNF148	0.000523935	0.00873653	1	1	1	C1	ZNF148
GPBP1L1	0.000542383	0.0290648	1	0.999	1	C1	GPBP1L1
TMEM30A	0.000567775	0.0288309	1	1	1	C1	TMEM30A
VCL	0.00060393	0.0274163	1	1	1	C1	VCL
DIAPH2	0.000605502	0.0130041	1	0.999	1	C1	DIAPH2
TNPO3	0.000620945	0.0192638	1	1	1	C1	TNPO3
PRKAR1A	0.000623689	0.0305985	1	0.999	1	C1	PRKAR1A
TPM3	0.000630844	0.0483723	0.998	1	1	C1	TPM3
MFAP1	0.000640061	0.00745616	0.998	0.999	1	C1	MFAP1
LARP1	0.000649906	0.022815	1	1	1	C1	LARP1
HOMER3	0.000651925	0.0208009	0.994	0.994	1	C1	HOMER3
CXCR4	0.000660575	0.0187408	1	1	1	C1	CXCR4
SP140	0.000697145	0.0303404	1	1	1	C1	SP140
RCOR1	0.00071714	0.0476247	0.998	0.999	1	C1	RCOR1
MS4A6A	0.000720277	0.032141	0.998	0.999	1	C1	MS4A6A
NFKBIB	0.00073691	0.0311047	1	1	1	C1	NFKBIB
DR1	0.000755445	0.0186396	1	0.999	1	C1	DR1
SLC22A18	0.000758931	0.0367198	1	1	1	C1	SLC22A18
UBE4B	0.000771055	0.0213102	1	0.999	1	C1	UBE4B
LRP1	0.000775995	0.0384263	0.998	0.998	1	C1	LRP1
RNASET2	0.000779968	0.0279308	1	1	1	C1	RNASET2
BECN1	0.000796454	0.0127651	1	0.999	1	C1	BECN1
ARF5	0.00079808	0.0291892	1	0.998	1	C1	ARF5
IFI44L	0.000798894	0.0318015	1	1	1	C1	IFI44L
TM9SF1	0.000812847	0.0270377	0.987	0.994	1	C1	TM9SF1
LAP3	0.00082012	0.0244787	1	1	1	C1	LAP3
SF3B1	0.000840588	0.038365	0.998	1	1	C1	SF3B1
LY96	0.000846584	0.0424349	1	1	1	C1	LY96
TIMM10	0.000847658	0.0302159	1	0.998	1	C1	TIMM10
RAB10	0.000857606	0.0210767	1	0.999	1	C1	RAB10
UPF2	0.000897129	0.0141673	1	1	1	C1	UPF2
OGFRL1	0.000903726	0.0369599	1	0.999	1	C1	OGFRL1
RARA	0.000927989	0.0368615	1	1	1	C1	RARA
ARF4	0.000938098	0.0258839	1	0.999	1	C1	ARF4
NRG1	0.000979073	0.0297927	0.987	0.99	1	C1	NRG1
KCTD12	0.00103404	0.0342886	1	0.998	1	C1	KCTD12
IFIT1	0.00104001	0.0253988	1	1	1	C1	IFIT1
NSD1	0.00106737	0.0339591	1	0.997	1	C1	NSD1
UBE2H	0.00108211	0.0252367	1	0.999	1	C1	UBE2H
EPS15	0.0010867	0.0264564	1	0.999	1	C1	EPS15
MPST	0.00109621	0.0165631	1	0.999	1	C1	MPST
GOLGA7	0.00111686	0.0349895	1	0.999	1	C1	GOLGA7
SLC25A37	0.0011478	0.0377638	1	1	1	C1	SLC25A37
ANKFY1	0.0011601	0.0256802	0.998	1	1	C1	ANKFY1
ELOVL1	0.00121926	0.0147707	1	1	1	C1	ELOVL1
RNF185	0.00124112	0.0313179	0.996	0.997	1	C1	RNF185
TNPO1	0.00125466	0.0261084	1	1	1	C1	TNPO1
NUP153	0.00127052	0.0182746	1	1	1	C1	NUP153
SBNO1	0.0012793	0.0393466	1	0.993	1	C1	SBNO1
FXYD6	0.00129609	0.0235294	0.994	0.999	1	C1	FXYD6
CASP10	0.00134174	0.0312436	1	1	1	C1	CASP10
DEDD2	0.00135529	0.0231749	1	1	1	C1	DEDD2
PJA2	0.00135961	0.024481	1	1	1	C1	PJA2
SRP54	0.00144173	0.00338701	1	0.999	1	C1	SRP54
CATSPER1	0.00145054	0.0350828	0.998	0.993	1	C1	CATSPER1
SAP130	0.00146153	0.00443736	1	1	1	C1	SAP130
RHOQ	0.0014744	0.0210298	1	1	1	C1	RHOQ
ULK1	0.00147871	0.0200501	1	1	1	C1	ULK1
TSPAN14	0.00148448	0.032453	0.996	1	1	C1	TSPAN14
TRIP12	0.00150629	0.0228057	1	1	1	C1	TRIP12
PTCRA	0.00152062	0.0186215	0.987	0.993	1	C1	PTCRA
SART1	0.00152284	0.0355938	1	1	1	C1	SART1
NDUFS2	0.00157351	0.0231364	1	0.999	1	C1	NDUFS2
MAD2L1BP	0.00162494	0.0128024	0.998	0.998	1	C1	MAD2L1BP
LSM10	0.00162847	0.0108447	1	1	1	C1	LSM10
RAB13	0.0017429	0.0299828	0.992	0.994	1	C1	RAB13
PPP1R15B	0.00175003	0.0371813	1	1	1	C1	PPP1R15B
YPEL5	0.00175171	0.0211589	1	1	1	C1	YPEL5
KYNU	0.00176818	0.020614	1	0.999	1	C1	KYNU
CDADC1	0.00177881	0.00593918	0.996	1	1	C1	CDADC1
SEMA4D	0.00181236	0.0308682	1	0.999	1	C1	SEMA4D
SAMD9	0.00184429	0.0371431	1	0.998	1	C1	SAMD9
CHMP4B	0.00186869	0.0280641	1	1	1	C1	CHMP4B
TIMP1	0.00190697	0.0307296	1	1	1	C1	TIMP1
RNPC3	0.00191153	0.0133385	1	1	1	C1	RNPC3
TPP1	0.00197489	0.0257182	1	1	1	C1	TPP1
ZNF384	0.0019763	0.0256774	1	0.999	1	C1	ZNF384
SAP30	0.00198147	0.031384	1	0.999	1	C1	SAP30
RER1	0.00201708	0.0220675	1	1	1	C1	RER1
VAPB	0.00202524	0.0269227	1	0.996	1	C1	VAPB
KLF3	0.00210745	0.0327719	1	0.999	1	C1	KLF3
TOR1A	0.00213603	0.0162204	1	1	1	C1	TOR1A
JAK1	0.00216292	0.0225544	1	1	1	C1	JAK1
UBE4A	0.00217315	0.019286	1	0.999	1	C1	UBE4A
CCM2	0.00219219	0.0239553	1	1	1	C1	CCM2
TANK	0.00225129	0.0447572	1	1	1	C1	TANK
UGP2	0.00226669	0.0251555	1	0.999	1	C1	UGP2
ACTN4	0.00236114	0.0292711	1	1	1	C1	ACTN4
NKIRAS2	0.00240014	0.0332657	1	1	1	C1	NKIRAS2
SNTB2	0.00247299	0.00812308	1	0.999	1	C1	SNTB2
HECA	0.00250783	0.0238409	1	0.999	1	C1	HECA
NBR1	0.00252777	0.0409224	1	1	1	C1	NBR1
GOLGA1	0.00254964	0.0144987	1	0.999	1	C1	GOLGA1
DOK1	0.0025526	0.0348575	1	0.999	1	C1	DOK1
RBM18	0.00255558	0.0156104	0.998	0.999	1	C1	RBM18
EPB41L3	0.00259932	0.0198884	0.996	1	1	C1	EPB41L3
HIPK2	0.00262967	0.0165709	1	1	1	C1	HIPK2
PARP10	0.00264988	0.0393387	1	0.998	1	C1	PARP10
GPBP1	0.00267643	0.0215226	1	1	1	C1	GPBP1
SH3KBP1	0.00272962	0.0228438	1	1	1	C1	SH3KBP1
UVRAG	0.00274164	0.00779356	1	1	1	C1	UVRAG
UBE2J2	0.00281805	0.0246192	1	1	1	C1	UBE2J2
YPEL3	0.00290841	0.034256	1	0.999	1	C1	YPEL3
ZNF592	0.00302213	0.0256815	1	0.999	1	C1	ZNF592
ALDH2	0.00305556	0.0100008	1	1	1	C1	ALDH2
TNIP2	0.00305976	0.00824358	1	1	1	C1	TNIP2
PARP8	0.00306397	0.0496641	1	1	1	C1	PARP8
CAPZB	0.00307451	0.0242805	1	1	1	C1	CAPZB
NUDT5	0.00313774	0.0077335	1	0.999	1	C1	NUDT5
CAST	0.0031586	0.0319312	1	1	1	C1	CAST
RNF122	0.00317234	0.0187475	1	0.998	1	C1	RNF122
SLC4A1AP	0.00317524	0.0261035	1	0.998	1	C1	SLC4A1AP
GOLGB1	0.00317524	0.0184465	1	0.996	1	C1	GOLGB1
STRN4	0.00318322	0.0274123	1	0.999	1	C1	STRN4
FBXW7	0.00318613	0.0177373	1	0.999	1	C1	FBXW7
SPATA13	0.00325515	0.0312953	1	0.999	1	C1	SPATA13
RNF166	0.00327299	0.0225218	1	1	1	C1	RNF166
CREB1	0.00334373	0.0271296	1	1	1	C1	CREB1
MED18	0.00346027	0.0278284	0.998	0.998	1	C1	MED18
HERC5	0.00351396	0.0248085	1	0.999	1	C1	HERC5
RAC1	0.00357727	0.027967	1	1	1	C1	RAC1
GPX3	0.00358051	0.027067	1	0.998	1	C1	GPX3
CREB5	0.00366882	0.0779502	1	1	1	C1	CREB5
RALY	0.0036713	0.01549	1	1	1	C1	RALY
GLB1	0.00379562	0.0147982	1	1	1	C1	GLB1
ACTR2	0.0038592	0.0286759	1	0.999	1	C1	ACTR2
AMPD3	0.00388438	0.0409814	1	0.996	1	C1	AMPD3
ANKRD44	0.0039299	0.0320005	1	1	1	C1	ANKRD44
ENTPD7	0.00395904	0.026651	1	1	1	C1	ENTPD7
PPP4R2	0.00399016	0.0386973	0.998	1	1	C1	PPP4R2
CNOT8	0.0040296	0.0116659	1	1	1	C1	CNOT8
SNX3	0.00405579	0.0250894	1	0.999	1	C1	SNX3
SP2	0.00411964	0.0268006	0.996	0.996	1	C1	SP2
HCLS1	0.00417137	0.0273972	1	0.999	1	C1	HCLS1
KLF4	0.00418253	0.0214394	1	0.997	1	C1	KLF4
MAFB	0.00428422	0.0140376	1	1	1	C1	MAFB
ARHGEF10L	0.0044272	0.0188032	0.992	0.992	1	C1	ARHGEF10L
ISG20	0.00448143	0.00897284	1	1	1	C1	ISG20
SLC24A3	0.00450728	0.0243402	0.992	0.993	1	C1	SLC24A3
SLC39A9	0.00451127	0.0259818	0.998	0.998	1	C1	SLC39A9
CTSB	0.00455837	0.0270415	1	1	1	C1	CTSB
LIMS1	0.00458057	0.0252636	1	1	1	C1	LIMS1
PHF11	0.00462322	0.00902012	1	1	1	C1	PHF11
PSMD13	0.00465801	0.0259888	1	1	1	C1	PSMD13
DCP2	0.00468994	0.0249427	0.998	1	1	C1	DCP2
GOLPH3	0.00475648	0.016433	1	0.999	1	C1	GOLPH3
NOTCH2	0.00489	0.0458229	1	0.997	1	C1	NOTCH2
TSG101	0.00489751	0.0156694	1	0.998	1	C1	TSG101
ATP6V1H	0.00490827	0.0143348	1	1	1	C1	ATP6V1H
LPP	0.00494174	0.0187595	1	1	1	C1	LPP
INPP5D	0.00496019	0.0244651	1	0.997	1	C1	INPP5D
STK10	0.00497979	0.0261114	1	1	1	C1	STK10
MYH9	0.00502359	0.0273001	1	1	1	C1	MYH9
GBP4	0.00505556	0.0322826	1	1	1	C1	GBP4
SERP1	0.00511112	0.0194111	1	1	1	C1	SERP1
NR3C1	0.00511224	0.0342857	1	0.999	1	C1	NR3C1
RFC2	0.00533893	0.0101935	1	1	1	C1	RFC2
FLI1	0.00537154	0.0177512	0.996	1	1	C1	FLI1
DAP	0.00542787	0.0191853	0.998	1	1	C1	DAP
SERPINB2	0.00543613	0.0418099	0.987	0.967	1	C1	SERPINB2
AMFR	0.00561343	0.0111367	1	1	1	C1	AMFR
HEXB	0.00567695	0.00504705	1	1	1	C1	HEXB
ABAT	0.00571636	0.0315835	1	0.999	1	C1	ABAT
PCBP1	0.00578093	0.023241	1	1	1	C1	PCBP1
TUSC2	0.00578217	0.0265928	1	0.999	1	C1	TUSC2
MAT2B	0.00588535	0.0286542	1	0.999	1	C1	MAT2B
CHST11	0.00600955	0.0449966	1	0.999	1	C1	CHST11
STIM1	0.00602248	0.0216092	1	0.999	1	C1	STIM1
RPS6KA3	0.0060784	0.0316484	1	1	1	C1	RPS6KA3
RNF34	0.00621158	0.018877	1	1	1	C1	RNF34
PPM1B	0.00629867	0.0265277	1	1	1	C1	PPM1B
POLR2J	0.00637185	0.0262621	1	1	1	C1	POLR2J
KIN	0.00640326	0.0148989	1	1	1	C1	KIN
WDR45	0.00641696	0.025999	1	0.999	1	C1	WDR45
ALDOA	0.00642381	0.033964	1	1	1	C1	ALDOA
SDHB	0.0064803	0.00858164	1	1	1	C1	SDHB
OAS1	0.00659744	0.0367324	1	1	1	C1	OAS1
MYO5A	0.00675227	0.0236132	1	1	1	C1	MYO5A
GLIPR1	0.00679256	0.0247609	1	1	1	C1	GLIPR1
ARHGAP25	0.00681134	0.0424061	1	1	1	C1	ARHGAP25
TMED1	0.00733644	0.00973295	1	1	1	C1	TMED1
ARHGDIB	0.00742662	0.0189788	1	1	1	C1	ARHGDIB
BAD	0.00810142	0.0125615	1	1	1	C1	BAD
ZNF24	0.00838985	0.0287862	1	0.999	1	C1	ZNF24
FTL	0.00841429	0.0318994	1	0.998	1	C1	FTL
VRK2	0.00843354	0.0131407	1	0.999	1	C1	VRK2
LILRB4	0.00843524	0.0200494	0.983	0.99	1	C1	LILRB4
PRKAR2B	0.00846513	0.0396811	1	0.999	1	C1	PRKAR2B
ZFYVE27	0.00871806	0.019735	1	0.997	1	C1	ZFYVE27
CDC40	0.00872528	0.0141779	1	0.996	1	C1	CDC40
ARID1A	0.00884704	0.0282436	1	0.999	1	C1	ARID1A
TIPRL	0.0090633	0.0129031	1	0.999	1	C1	TIPRL
PSMD6	0.00923855	0.018111	1	1	1	C1	PSMD6
HMGCL	0.00958637	0.0111862	1	0.999	1	C1	HMGCL
PPP2R2A	0.00964744	0.0164213	1	1	1	C1	PPP2R2A
ITSN2	0.00992756	0.0409362	0.998	0.997	1	C1	ITSN2
MT2A	7.68483e-11	0.04711	1	1	6.51136e-07	C2	MT2A
SCO21	4.18968e-09	0.0496288	1	1	3.54992e-05	C2	SCO2
RIPK21	2.64379e-08	0.0290286	1	1	0.000224008	C2	RIPK2
VAMP51	5.26195e-08	0.054201	1	0.999	0.000445845	C2	VAMP5
C21	1.93463e-07	0.0951408	0.99	0.975	0.00163922	C2	C2
BLVRA	2.65376e-07	0.0479702	1	0.997	0.00224853	C2	BLVRA
ANKRD221	3.48978e-07	0.0784625	0.998	0.994	0.00295689	C2	ANKRD22
LYSMD2	3.64477e-07	0.047859	1	1	0.00308821	C2	LYSMD2
ASGR1	4.75303e-07	0.0486572	1	0.991	0.00402724	C2	ASGR1
P2RX7	1.28605e-06	0.0401125	1	1	0.0108967	C2	P2RX7
ICAM2	2.1409e-06	0.040829	1	0.999	0.0181398	C2	ICAM2
LGALS2	2.17456e-06	0.0807756	1	0.989	0.0184251	C2	LGALS2
TIMM101	2.2696e-06	0.0641227	0.995	1	0.0192304	C2	TIMM10
SAT2	2.61855e-06	0.0302607	1	0.998	0.022187	C2	SAT2
LHFPL21	3.20445e-06	0.0381024	1	1	0.0271513	C2	LHFPL2
CAMP1	3.99056e-06	0.0614541	0.998	0.999	0.033812	C2	CAMP
IL1B1	5.59788e-06	0.038851	1	0.999	0.0474309	C2	IL1B
LY86	8.60897e-06	0.0367895	1	0.997	0.0729438	C2	LY86
AKR7A2	8.91476e-06	0.0360707	1	0.992	0.0755348	C2	AKR7A2
GHRL1	1.53101e-05	0.0448211	0.998	0.999	0.129723	C2	GHRL
HERC51	1.57818e-05	0.0572664	1	0.999	0.133719	C2	HERC5
CD33	1.69573e-05	0.0262039	1	1	0.143679	C2	CD33
SERTAD11	1.77104e-05	0.0349153	1	0.999	0.15006	C2	SERTAD1
MTMR11	1.90977e-05	0.0357572	0.998	1	0.161815	C2	MTMR11
FOLR2	2.16565e-05	0.0541676	0.995	0.985	0.183495	C2	FOLR2
IFI44L1	2.31539e-05	0.0557025	1	1	0.196183	C2	IFI44L
MRPS18A	3.00697e-05	0.0416128	1	1	0.25478	C2	MRPS18A
SCARB2	3.17338e-05	0.0281724	1	0.999	0.268881	C2	SCARB2
SDSL	3.57951e-05	0.0735256	0.99	0.987	0.303292	C2	SDSL
RPIA	3.80733e-05	0.0261228	1	0.998	0.322595	C2	RPIA
PLA2G7	7.28144e-05	0.0386217	0.995	0.986	0.616956	C2	PLA2G7
LCN21	8.99237e-05	0.0461259	1	0.999	0.761924	C2	LCN2
IGFBP7	9.01708e-05	0.0330963	1	1	0.764018	C2	IGFBP7
C1QB1	0.000100082	0.0540549	0.993	0.997	0.847997	C2	C1QB
MED19	0.000101303	0.0305097	1	0.999	0.858339	C2	MED19
KYNU1	0.000101764	0.0271345	0.998	1	0.862248	C2	KYNU
MS4A7	0.000127991	0.0327882	1	1	1	C2	MS4A7
ISG201	0.000131989	0.0218442	1	1	1	C2	ISG20
ALDH1A1	0.000133574	0.0435507	1	0.996	1	C2	ALDH1A1
POLR2G	0.000142064	0.0426928	1	1	1	C2	POLR2G
AP2S1	0.000147959	0.0275182	1	1	1	C2	AP2S1
PTCRA1	0.000156333	0.0414846	0.995	0.99	1	C2	PTCRA
IFI27	0.000160733	0.0710983	0.99	0.984	1	C2	IFI27
GPBAR1	0.000164714	0.0292012	0.993	0.988	1	C2	GPBAR1
MRPL23	0.000179998	0.0255158	1	0.998	1	C2	MRPL23
POP7	0.000195578	0.0307144	1	0.998	1	C2	POP7
OTOF	0.000242755	0.0947051	0.956	0.916	1	C2	OTOF
EPSTI11	0.000250914	0.0443748	1	1	1	C2	EPSTI1
FBXO61	0.00026082	0.0281835	0.998	1	1	C2	FBXO6
MGST2	0.00026292	0.0396068	1	1	1	C2	MGST2
ZBP11	0.000266024	0.0323673	1	1	1	C2	ZBP1
TMEM39B	0.00028022	0.0363661	0.998	0.997	1	C2	TMEM39B
NDUFA12	0.000289883	0.0349825	1	1	1	C2	NDUFA12
MRPL14	0.000328296	0.0322277	0.998	0.995	1	C2	MRPL14
NDUFA8	0.000424514	0.0420836	1	0.996	1	C2	NDUFA8
POLR1C	0.000508205	0.0219842	1	1	1	C2	POLR1C
SLC31A21	0.000513247	0.0496773	1	1	1	C2	SLC31A2
PCBD1	0.000570317	0.0368015	0.998	0.991	1	C2	PCBD1
CHMP4A	0.000692863	0.0432433	1	0.999	1	C2	CHMP4A
MRPL18	0.000760083	0.0300187	1	1	1	C2	MRPL18
CATSPER11	0.000821473	0.0395487	0.995	0.995	1	C2	CATSPER1
IL151	0.000845769	0.0187134	0.993	0.998	1	C2	IL15
PSMB6	0.000959538	0.0245565	1	1	1	C2	PSMB6
ASCL2	0.000969144	0.0312975	0.993	0.994	1	C2	ASCL2
POLB1	0.00103676	0.0253629	1	1	1	C2	POLB
TM9SF11	0.00107274	0.0361463	0.998	0.99	1	C2	TM9SF1
NDUFA13	0.00115924	0.0393093	1	0.998	1	C2	NDUFA13
DPYSL2	0.00124507	0.0304663	1	1	1	C2	DPYSL2
LAP31	0.0013388	0.0487396	1	1	1	C2	LAP3
DHRS1	0.00142153	0.0144721	0.998	1	1	C2	DHRS1
NT5C	0.00143936	0.0375064	1	0.999	1	C2	NT5C
TNFAIP61	0.00143973	0.0296811	1	0.999	1	C2	TNFAIP6
MAFB1	0.0016467	0.0262772	1	1	1	C2	MAFB
NPC2	0.00166754	0.0273736	1	1	1	C2	NPC2
CHST13	0.00169073	0.0507467	0.998	0.987	1	C2	CHST13
TMEM60	0.00187514	0.0364151	0.998	1	1	C2	TMEM60
SLC25A14	0.00187981	0.0413686	1	0.998	1	C2	SLC25A14
RYK	0.00189202	0.00500445	1	1	1	C2	RYK
UROD	0.00189343	0.0367316	1	1	1	C2	UROD
MSRA1	0.00190193	0.0305616	1	1	1	C2	MSRA
FUNDC1	0.00194687	0.0367245	1	0.996	1	C2	FUNDC1
POLE4	0.00237826	0.0441476	1	0.998	1	C2	POLE4
GAS61	0.00244888	0.0250596	1	0.999	1	C2	GAS6
PROS1	0.00245784	0.0755994	0.953	0.921	1	C2	PROS1
TMEM42	0.00245784	0.0607911	1	0.996	1	C2	TMEM42
GBGT11	0.00259716	0.020648	1	0.998	1	C2	GBGT1
GBP41	0.00275227	0.0334383	1	1	1	C2	GBP4
FHL2	0.00277291	0.0352076	1	1	1	C2	FHL2
PAFAH1B3	0.00281733	0.0386454	1	0.989	1	C2	PAFAH1B3
AIM21	0.00299154	0.0185267	0.998	1	1	C2	AIM2
WDR18	0.00302898	0.0321664	0.998	0.99	1	C2	WDR18
COMMD1	0.00306247	0.0332965	1	0.999	1	C2	COMMD1
SOD1	0.00333085	0.0466584	1	1	1	C2	SOD1
NDUFS3	0.00334034	0.0264351	1	0.999	1	C2	NDUFS3
PDRG1	0.00380527	0.0294889	1	0.998	1	C2	PDRG1
EBNA1BP2	0.00400604	0.0261089	1	0.998	1	C2	EBNA1BP2
NDUFA7	0.00406812	0.0214008	1	0.997	1	C2	NDUFA7
KRT10	0.00409091	0.0348209	1	0.997	1	C2	KRT10
EXOSC1	0.00411861	0.0196955	1	1	1	C2	EXOSC1
PMS1	0.00411861	0.00577609	1	0.999	1	C2	PMS1
PPOX	0.00452458	0.0176657	0.995	1	1	C2	PPOX
LILRB31	0.00461505	0.060153	0.993	0.986	1	C2	LILRB3
TMED3	0.00462466	0.0225567	0.998	0.998	1	C2	TMED3
GBP51	0.00472565	0.0283755	1	1	1	C2	GBP5
SLC24A31	0.00478128	0.047283	0.993	0.993	1	C2	SLC24A3
TST1	0.00479445	0.0363849	1	0.995	1	C2	TST
VAMP8	0.00487978	0.0266434	1	1	1	C2	VAMP8
FBXW9	0.00500745	0.0469597	0.993	0.989	1	C2	FBXW9
CDKN1C	0.00527797	0.0415278	1	0.993	1	C2	CDKN1C
MCCC1	0.00566298	0.0136681	0.99	0.997	1	C2	MCCC1
COX17	0.00585101	0.0624096	0.998	0.999	1	C2	COX17
WDR61	0.00592911	0.0362973	1	1	1	C2	WDR61
KRTCAP2	0.00595981	0.0335431	1	1	1	C2	KRTCAP2
INPP1	0.00606228	0.0371363	1	0.999	1	C2	INPP1
SDF2L1	0.00656077	0.0362644	1	0.992	1	C2	SDF2L1
IFIT11	0.0065988	0.0369676	1	1	1	C2	IFIT1
RAB34	0.00697314	0.0370392	1	0.996	1	C2	RAB34
DUSP18	0.00712091	0.0305269	1	0.999	1	C2	DUSP18
NDUFS8	0.00715396	0.0222858	1	1	1	C2	NDUFS8
SLC25A28	0.00784609	0.0164726	1	1	1	C2	SLC25A28
ANKRD39	0.00796681	0.0500365	1	1	1	C2	ANKRD39
ALOX121	0.00801557	0.0264015	1	1	1	C2	ALOX12
NDUFB2	0.00805231	0.0343507	0.998	1	1	C2	NDUFB2
CTDSPL1	0.00829392	0.0384649	0.998	0.997	1	C2	CTDSPL
ROBO3	0.0084959	0.0313346	0.993	0.991	1	C2	ROBO3
COX5A	0.00861622	0.0218793	1	0.997	1	C2	COX5A
ICAM4	0.00893617	0.0454813	0.995	0.994	1	C2	ICAM4
EPB41L31	0.00933652	0.0228027	1	0.998	1	C2	EPB41L3
MRPL21	0.00938063	0.0241591	0.998	0.997	1	C2	MRPL21
TREML11	0.00940679	0.0228527	0.998	0.997	1	C2	TREML1
MT1X	0.00962455	0.0273287	0.995	0.994	1	C2	MT1X
COX8A	0.00994798	0.0243683	1	0.997	1	C2	COX8A
ZNF548	7.4028e-46	0.0774122	0.996	0.997	6.27239e-42	C3	ZNF548
NCALD	1.12565e-37	0.0762962	1	1	9.53762e-34	C3	NCALD
PLEKHA1	3.7666e-37	0.0693525	1	1	3.19144e-33	C3	PLEKHA1
PYHIN1	7.20659e-35	0.0670438	0.996	1	6.10614e-31	C3	PYHIN1
ICOS	3.65598e-34	0.0699648	0.996	0.992	3.09771e-30	C3	ICOS
XPO4	1.48377e-33	0.056619	0.998	0.997	1.2572e-29	C3	XPO4
CD3D	3.81209e-27	0.0658254	1	1	3.22999e-23	C3	CD3D
PRPS1	4.37339e-27	0.0502186	0.998	0.999	3.70557e-23	C3	PRPS1
PTPN4	4.91123e-27	0.0699243	1	0.999	4.16129e-23	C3	PTPN4
DKC1	5.79705e-27	0.0303097	1	0.999	4.91184e-23	C3	DKC1
ABCB1	1.12778e-26	0.0606293	1	0.991	9.5557e-23	C3	ABCB1
KLRG1	1.99957e-26	0.0464071	1	1	1.69423e-22	C3	KLRG1
ZDHHC8	2.51002e-26	0.0337897	0.994	0.99	2.12674e-22	C3	ZDHHC8
MRPL3	1.05069e-25	0.0370638	1	0.997	8.90253e-22	C3	MRPL3
LPIN1	1.70319e-25	0.0469941	1	1	1.44311e-21	C3	LPIN1
PWP1	2.93831e-25	0.0192511	0.996	1	2.48963e-21	C3	PWP1
CBLB	7.29064e-25	0.0493124	0.998	0.999	6.17736e-21	C3	CBLB
CCNB1IP1	1.00843e-24	0.0431186	1	1	8.54441e-21	C3	CCNB1IP1
PLEKHF1	1.01281e-24	0.0525673	0.996	0.993	8.58152e-21	C3	PLEKHF1
MAGEH1	1.25785e-24	0.0352986	0.998	0.998	1.06578e-20	C3	MAGEH1
SAMD3	1.36367e-24	0.0619793	1	1	1.15544e-20	C3	SAMD3
NUP107	1.58642e-24	0.037099	1	1	1.34418e-20	C3	NUP107
GZMK	4.90103e-24	0.0749617	0.996	0.997	4.15264e-20	C3	GZMK
BBS2	4.9962e-24	0.0303231	1	1	4.23328e-20	C3	BBS2
GPR18	9.07256e-24	0.0613996	1	1	7.68718e-20	C3	GPR18
CD3G	1.16047e-23	0.0739443	1	1	9.83267e-20	C3	CD3G
SH2D1A	1.07317e-22	0.076442	1	0.999	9.09299e-19	C3	SH2D1A
GZMA	2.82636e-22	0.050768	1	0.999	2.39477e-18	C3	GZMA
MPHOSPH10	3.67957e-22	0.0300126	0.998	0.999	3.1177e-18	C3	MPHOSPH10
ACTR5	5.30838e-22	0.0225047	0.996	0.998	4.49779e-18	C3	ACTR5
MBNL2	5.97056e-22	0.0573279	1	0.999	5.05886e-18	C3	MBNL2
IBTK	1.18414e-21	0.0504679	1	0.999	1.00332e-17	C3	IBTK
PFAS	1.73531e-21	0.0341589	1	0.999	1.47033e-17	C3	PFAS
HABP4	2.23743e-21	0.0452786	1	0.999	1.89577e-17	C3	HABP4
RNF125	9.78366e-21	0.0482663	1	1	8.2897e-17	C3	RNF125
GZMH	1.96059e-20	0.0606589	1	0.998	1.66121e-16	C3	GZMH
UCKL1	2.30991e-20	0.0351646	1	0.999	1.95718e-16	C3	UCKL1
GTF3C3	4.47761e-20	0.0342854	0.998	0.999	3.79388e-16	C3	GTF3C3
IMP3	5.31175e-20	0.0306134	1	0.999	4.50065e-16	C3	IMP3
EOMES	7.10174e-20	0.0571074	0.998	1	6.0173e-16	C3	EOMES
AP4B1	1.23692e-19	0.0218661	0.998	0.998	1.04804e-15	C3	AP4B1
THOC1	1.34592e-19	0.0439733	1	1	1.1404e-15	C3	THOC1
DDHD2	2.32564e-19	0.0513002	0.998	1	1.97051e-15	C3	DDHD2
BDP1	2.4068e-19	0.0593194	1	0.998	2.03928e-15	C3	BDP1
RAP2A	8.3269e-19	0.047303	0.996	1	7.05538e-15	C3	RAP2A
WDR36	8.54322e-19	0.0457196	1	0.997	7.23867e-15	C3	WDR36
AK3	1.30245e-18	0.0250833	1	1	1.10356e-14	C3	AK3
ZNF227	1.83825e-18	0.0290818	1	1	1.55755e-14	C3	ZNF227
KLHDC2	1.84739e-18	0.0305004	1	0.999	1.56529e-14	C3	KLHDC2
TGFBR3	2.59703e-18	0.0792533	0.998	0.998	2.20047e-14	C3	TGFBR3
POMGNT1	2.7639e-18	0.0535106	1	0.995	2.34185e-14	C3	POMGNT1
CLEC2D	2.77928e-18	0.07212	1	0.999	2.35488e-14	C3	CLEC2D
PMS11	2.90177e-18	0.044883	1	0.999	2.45867e-14	C3	PMS1
UAP1	3.37603e-18	0.0361884	1	0.997	2.86051e-14	C3	UAP1
CCT2	5.45866e-18	0.0372	1	0.998	4.62512e-14	C3	CCT2
ITK	6.07053e-18	0.0650881	1	0.999	5.14356e-14	C3	ITK
ATIC	1.34942e-17	0.0233968	1	0.997	1.14336e-13	C3	ATIC
BANK1	2.46086e-17	0.0608961	1	0.999	2.08509e-13	C3	BANK1
SH2D1B	2.7738e-17	0.0464474	0.994	0.992	2.35024e-13	C3	SH2D1B
IER3IP1	2.80215e-17	0.0310625	0.998	1	2.37426e-13	C3	IER3IP1
SNX25	4.28933e-17	0.0549446	0.998	0.999	3.63435e-13	C3	SNX25
PCYOX1	1.01364e-16	0.0313386	1	1	8.58856e-13	C3	PCYOX1
EPHX2	1.2024e-16	0.0650858	0.998	0.986	1.01879e-12	C3	EPHX2
SNX4	1.55365e-16	0.0628159	1	0.999	1.31641e-12	C3	SNX4
CDC16	1.77888e-16	0.0206891	1	1	1.50724e-12	C3	CDC16
SLC25A36	2.02324e-16	0.059466	1	0.999	1.71429e-12	C3	SLC25A36
HSPH1	2.06486e-16	0.034667	1	0.999	1.74956e-12	C3	HSPH1
TMEM50B	2.12208e-16	0.0350138	0.998	1	1.79804e-12	C3	TMEM50B
GFM1	2.19103e-16	0.0291975	0.998	0.998	1.85646e-12	C3	GFM1
RNF170	2.41141e-16	0.0280413	0.998	1	2.04319e-12	C3	RNF170
ITPR3	3.77145e-16	0.0498304	1	1	3.19555e-12	C3	ITPR3
HLCS	3.8152e-16	0.0381986	1	0.997	3.23262e-12	C3	HLCS
ALG8	5.79798e-16	0.0334873	1	0.995	4.91263e-12	C3	ALG8
CD6	6.81377e-16	0.0537214	0.996	0.997	5.7733e-12	C3	CD6
NR1D2	6.83718e-16	0.0614804	0.998	0.997	5.79315e-12	C3	NR1D2
BIN1	7.98163e-16	0.0487985	0.998	0.994	6.76284e-12	C3	BIN1
AGA	8.24069e-16	0.0235194	0.998	1	6.98233e-12	C3	AGA
PDCD5	1.07249e-15	0.0147728	1	1	9.08718e-12	C3	PDCD5
TULP4	1.08844e-15	0.0295583	0.998	0.999	9.22236e-12	C3	TULP4
GZMB	1.09775e-15	0.0412709	1	1	9.30124e-12	C3	GZMB
MAP4K5	1.27867e-15	0.0364418	1	1	1.08342e-11	C3	MAP4K5
ZNF500	1.44004e-15	0.0285111	1	0.995	1.22015e-11	C3	ZNF500
BCKDHB	1.5507e-15	0.0577449	0.998	0.997	1.31391e-11	C3	BCKDHB
NPAT	2.9383e-15	0.0531497	1	0.998	2.48962e-11	C3	NPAT
BZW2	3.07273e-15	0.0279278	1	1	2.60352e-11	C3	BZW2
BCL11B	4.05211e-15	0.0663821	1	1	3.43336e-11	C3	BCL11B
CD8A	5.29318e-15	0.0739813	1	0.998	4.48491e-11	C3	CD8A
CACNA2D2	5.47214e-15	0.0550049	0.998	0.997	4.63654e-11	C3	CACNA2D2
ZNF22	5.97899e-15	0.0508187	1	0.998	5.066e-11	C3	ZNF22
MTSS1	7.5025e-15	0.059382	1	1	6.35686e-11	C3	MTSS1
MRPS35	8.23452e-15	0.0166473	0.998	0.998	6.97711e-11	C3	MRPS35
CLNS1A	1.12423e-14	0.0269172	1	1	9.52561e-11	C3	CLNS1A
C1QBP	1.172e-14	0.0306404	1	0.997	9.93039e-11	C3	C1QBP
METAP2	1.17522e-14	0.0386154	1	0.999	9.9576e-11	C3	METAP2
IL32	1.40982e-14	0.0605042	1	0.999	1.19454e-10	C3	IL32
AKR1B1	1.41599e-14	0.0386897	1	0.997	1.19976e-10	C3	AKR1B1
SEPHS1	1.48724e-14	0.0446842	1	0.994	1.26014e-10	C3	SEPHS1
MRPL42	1.63782e-14	0.0327102	1	0.999	1.38773e-10	C3	MRPL42
COPS8	2.0611e-14	0.0403234	1	1	1.74637e-10	C3	COPS8
PPP1R16B	2.47249e-14	0.0580845	0.998	0.999	2.09494e-10	C3	PPP1R16B
ARL2BP	2.54575e-14	0.0299067	0.998	1	2.15701e-10	C3	ARL2BP
ZNF510	3.87106e-14	0.0487275	1	0.993	3.27995e-10	C3	ZNF510
PDIK1L	4.34883e-14	0.0518604	1	0.997	3.68476e-10	C3	PDIK1L
LEO1	5.7823e-14	0.0229735	1	1	4.89934e-10	C3	LEO1
MANEA	5.80702e-14	0.0510315	0.998	0.998	4.92028e-10	C3	MANEA
LY9	6.00214e-14	0.0615659	1	0.999	5.08561e-10	C3	LY9
TRIB2	6.13143e-14	0.0620473	1	1	5.19516e-10	C3	TRIB2
PHF10	6.2969e-14	0.0332521	1	0.999	5.33536e-10	C3	PHF10
ZNF331	7.28855e-14	0.0528116	0.998	0.995	6.17559e-10	C3	ZNF331
CD52	7.87168e-14	0.0554699	1	0.998	6.66968e-10	C3	CD52
MAPKAPK5	9.78017e-14	0.022871	1	1	8.28673e-10	C3	MAPKAPK5
FNBP4	1.03598e-13	0.0375689	1	1	8.77787e-10	C3	FNBP4
POLE3	1.15186e-13	0.0323118	1	0.998	9.75967e-10	C3	POLE3
GPD1L	1.29059e-13	0.0306407	0.998	1	1.09351e-09	C3	GPD1L
ZNF514	1.36886e-13	0.0373599	0.996	0.998	1.15983e-09	C3	ZNF514
PIGK	1.45331e-13	0.0413044	1	0.997	1.23139e-09	C3	PIGK
ZNF83	1.46019e-13	0.0717087	1	0.998	1.23722e-09	C3	ZNF83
ETS1	1.69991e-13	0.0676859	1	0.999	1.44033e-09	C3	ETS1
CCND2	1.76333e-13	0.0467063	1	1	1.49407e-09	C3	CCND2
NUP160	1.84733e-13	0.0376174	1	0.999	1.56524e-09	C3	NUP160
FN3KRP	1.92015e-13	0.0262491	0.998	0.993	1.62695e-09	C3	FN3KRP
SKP2	1.92418e-13	0.0380459	1	0.999	1.63035e-09	C3	SKP2
SLAMF6	1.94235e-13	0.0601401	0.998	0.997	1.64575e-09	C3	SLAMF6
PTPRCAP	2.04954e-13	0.0586857	0.988	0.986	1.73657e-09	C3	PTPRCAP
TMEM19	2.20946e-13	0.0400302	1	1	1.87207e-09	C3	TMEM19
RRM1	3.05078e-13	0.0327545	1	1	2.58493e-09	C3	RRM1
ASNS	3.17819e-13	0.0285256	1	1	2.69288e-09	C3	ASNS
OCIAD2	3.69419e-13	0.0512962	0.996	0.994	3.13009e-09	C3	OCIAD2
EBAG9	5.50678e-13	0.0144427	0.998	1	4.66589e-09	C3	EBAG9
CHST12	5.94049e-13	0.0315984	0.998	1	5.03338e-09	C3	CHST12
CDC25B	6.03241e-13	0.0511616	0.998	0.999	5.11126e-09	C3	CDC25B
FBL	6.32308e-13	0.0359345	0.998	0.997	5.35755e-09	C3	FBL
USP14	6.52001e-13	0.0473139	1	1	5.52441e-09	C3	USP14
SLC38A1	6.62073e-13	0.064085	1	1	5.60974e-09	C3	SLC38A1
CD160	6.93565e-13	0.0713724	1	0.999	5.87658e-09	C3	CD160
CD72	1.0647e-12	0.0459589	0.998	1	9.02119e-09	C3	CD72
RPUSD4	1.10534e-12	0.0458354	1	0.997	9.36555e-09	C3	RPUSD4
LRRC14	1.12566e-12	0.0402932	1	0.999	9.5377e-09	C3	LRRC14
WDR59	1.55763e-12	0.0262587	1	1	1.31978e-08	C3	WDR59
PIGH	1.56233e-12	0.0228039	1	1	1.32377e-08	C3	PIGH
BLK	2.11274e-12	0.0646302	0.996	0.997	1.79012e-08	C3	BLK
ARHGEF3	2.9007e-12	0.0465035	1	0.998	2.45776e-08	C3	ARHGEF3
CHI3L2	3.01976e-12	0.0583175	0.998	0.992	2.55864e-08	C3	CHI3L2
ARHGAP10	3.11105e-12	0.0297504	0.998	0.998	2.63599e-08	C3	ARHGAP10
ZNF146	3.68174e-12	0.042476	1	0.999	3.11954e-08	C3	ZNF146
MAT2A	3.80198e-12	0.0300438	1	1	3.22142e-08	C3	MAT2A
FKBP3	3.92412e-12	0.0306696	1	1	3.32491e-08	C3	FKBP3
CXCR3	5.22671e-12	0.066711	0.992	0.988	4.42859e-08	C3	CXCR3
MTMR2	5.69556e-12	0.0306867	1	0.998	4.82585e-08	C3	MTMR2
ADSL	6.27258e-12	0.0146693	1	1	5.31475e-08	C3	ADSL
KLRF1	7.4133e-12	0.0719657	0.998	0.995	6.28129e-08	C3	KLRF1
AASDH	9.46427e-12	0.025598	1	1	8.01908e-08	C3	AASDH
USP46	9.60306e-12	0.0421968	0.998	0.995	8.13667e-08	C3	USP46
KLRD1	1.08137e-11	0.0569577	1	1	9.16245e-08	C3	KLRD1
ITGB7	1.36674e-11	0.0398508	1	1	1.15804e-07	C3	ITGB7
LYAR	1.47544e-11	0.0334969	0.998	0.999	1.25014e-07	C3	LYAR
SYT11	1.50265e-11	0.0434346	1	0.999	1.2732e-07	C3	SYT11
PRKAB2	1.53256e-11	0.0345122	1	0.999	1.29854e-07	C3	PRKAB2
ACAT2	1.74627e-11	0.00988375	1	1	1.47961e-07	C3	ACAT2
CRYZ	2.36746e-11	0.0751155	1	0.995	2.00595e-07	C3	CRYZ
RPL9	2.81336e-11	0.0601723	0.998	0.999	2.38376e-07	C3	RPL9
LDHB	3.07562e-11	0.0473281	1	1	2.60597e-07	C3	LDHB
PKIA	3.5394e-11	0.0504343	0.996	0.994	2.99894e-07	C3	PKIA
METTL3	3.5528e-11	0.0293746	1	0.999	3.01029e-07	C3	METTL3
AKAP11	3.56793e-11	0.0569319	1	0.999	3.02311e-07	C3	AKAP11
NIPA1	3.728e-11	0.0394061	0.998	0.995	3.15873e-07	C3	NIPA1
WDR12	3.86219e-11	0.0303597	1	0.999	3.27243e-07	C3	WDR12
TRAM1	4.09834e-11	0.0105999	1	0.999	3.47252e-07	C3	TRAM1
NKG7	4.76566e-11	0.0464204	0.998	0.999	4.03794e-07	C3	NKG7
MAL	5.4286e-11	0.0414586	0.992	0.992	4.59965e-07	C3	MAL
NUP43	5.69648e-11	0.0321076	0.998	0.998	4.82663e-07	C3	NUP43
GFOD1	5.90789e-11	0.0425591	1	0.998	5.00575e-07	C3	GFOD1
RAD1	8.50749e-11	0.024436	1	1	7.20839e-07	C3	RAD1
MRPL41	9.47155e-11	0.0261547	0.996	0.997	8.02525e-07	C3	MRPL41
COX11	1.00484e-10	0.0306098	0.998	0.998	8.51398e-07	C3	COX11
MS4A1	1.06644e-10	0.0913138	0.998	0.998	9.03593e-07	C3	MS4A1
IL7R	1.22657e-10	0.0521019	1	1	1.03928e-06	C3	IL7R
CD69	1.23109e-10	0.0695648	0.998	0.999	1.0431e-06	C3	CD69
EI24	1.23506e-10	0.016026	0.998	1	1.04646e-06	C3	EI24
MLH1	1.29904e-10	0.00858776	1	1	1.10067e-06	C3	MLH1
MOAP1	1.37001e-10	0.0240596	0.996	0.999	1.16081e-06	C3	MOAP1
APEX1	1.50002e-10	0.0233297	1	0.998	1.27096e-06	C3	APEX1
SLC12A2	1.57449e-10	0.0418208	0.998	0.998	1.33407e-06	C3	SLC12A2
PGM3	2.57639e-10	0.0230157	1	0.999	2.18298e-06	C3	PGM3
ZNF195	3.09656e-10	0.0207621	1	0.999	2.62372e-06	C3	ZNF195
IQCB1	3.3304e-10	0.0353867	1	1	2.82185e-06	C3	IQCB1
ASB1	3.87168e-10	0.0337076	1	0.998	3.28048e-06	C3	ASB1
GNLY	4.11072e-10	0.0560222	1	1	3.48301e-06	C3	GNLY
NSUN2	4.65762e-10	0.0273556	1	0.999	3.9464e-06	C3	NSUN2
PDCD2	4.88268e-10	0.0369333	1	0.997	4.13709e-06	C3	PDCD2
TOMM20	5.03708e-10	0.0180862	0.998	1	4.26792e-06	C3	TOMM20
MDH1	5.18933e-10	0.0298406	1	1	4.39692e-06	C3	MDH1
HAGHL	5.39853e-10	0.0229532	1	1	4.57417e-06	C3	HAGHL
HDHD2	5.84708e-10	0.0295115	1	0.999	4.95423e-06	C3	HDHD2
TAF9	5.84967e-10	0.0317574	0.998	1	4.95642e-06	C3	TAF9
KIAA1191	6.618e-10	0.0234534	1	1	5.60743e-06	C3	KIAA1191
YWHAQ	6.65317e-10	0.0234479	1	0.997	5.63723e-06	C3	YWHAQ
DNAJB9	7.43521e-10	0.024461	1	1	6.29985e-06	C3	DNAJB9
EML4	8.08344e-10	0.0277576	1	1	6.8491e-06	C3	EML4
ARPC5L	8.10835e-10	0.0204418	1	1	6.8702e-06	C3	ARPC5L
ZNF395	8.71375e-10	0.0413242	0.998	0.995	7.38316e-06	C3	ZNF395
ZFAND1	9.59554e-10	0.0436127	1	1	8.1303e-06	C3	ZFAND1
CLIC3	9.63759e-10	0.0402785	0.996	0.993	8.16593e-06	C3	CLIC3
OFD1	1.1532e-09	0.0292425	1	1	9.77105e-06	C3	OFD1
CXXC5	1.18993e-09	0.0284957	0.996	0.999	1.00823e-05	C3	CXXC5
PRF1	1.20347e-09	0.0395235	1	1	1.0197e-05	C3	PRF1
ILF2	1.41081e-09	0.0224817	1	1	1.19538e-05	C3	ILF2
CUL5	1.43921e-09	0.0266214	1	1	1.21945e-05	C3	CUL5
BCCIP	1.57885e-09	0.012224	0.996	1	1.33776e-05	C3	BCCIP
BNIP1	1.67508e-09	0.0329977	0.992	0.993	1.41929e-05	C3	BNIP1
GZMM	1.75117e-09	0.050838	0.996	0.995	1.48377e-05	C3	GZMM
CDCA7L	1.80014e-09	0.0313272	0.998	0.998	1.52526e-05	C3	CDCA7L
GNG7	1.86965e-09	0.0435551	1	0.999	1.58416e-05	C3	GNG7
MTO1	1.94261e-09	0.0279939	1	0.998	1.64597e-05	C3	MTO1
POLR2H	2.23526e-09	0.0305438	1	1	1.89394e-05	C3	POLR2H
NET1	2.50568e-09	0.0332457	1	0.999	2.12307e-05	C3	NET1
TNFRSF25	2.61719e-09	0.0505094	1	0.995	2.21754e-05	C3	TNFRSF25
DDX24	2.77695e-09	0.036804	1	1	2.35291e-05	C3	DDX24
NME3	2.83912e-09	0.0221374	1	1	2.40559e-05	C3	NME3
FDX1	2.91751e-09	0.0238996	0.998	0.998	2.472e-05	C3	FDX1
CLYBL	3.04293e-09	0.0535964	0.998	0.997	2.57827e-05	C3	CLYBL
TMED31	3.1709e-09	0.0170728	1	0.997	2.6867e-05	C3	TMED3
SLC25A4	3.30831e-09	0.0615702	1	0.995	2.80313e-05	C3	SLC25A4
ULK2	3.33931e-09	0.0277823	1	0.998	2.8294e-05	C3	ULK2
FYN	3.45151e-09	0.0366927	1	0.999	2.92447e-05	C3	FYN
CHD6	3.45736e-09	0.0427488	1	1	2.92942e-05	C3	CHD6
CD244	3.50453e-09	0.0511141	0.998	0.999	2.96939e-05	C3	CD244
PPWD1	3.52834e-09	0.00672377	1	1	2.98956e-05	C3	PPWD1
TCERG1	3.68392e-09	0.0470428	1	0.999	3.12138e-05	C3	TCERG1
ZNF480	3.95316e-09	0.0433734	1	0.999	3.34951e-05	C3	ZNF480
GRAP	3.97489e-09	0.02652	0.994	0.993	3.36792e-05	C3	GRAP
ID2	4.04936e-09	0.027863	1	1	3.43103e-05	C3	ID2
NSUN6	4.16537e-09	0.0394366	0.998	0.995	3.52932e-05	C3	NSUN6
CEBPZ	4.42015e-09	0.0352714	0.998	1	3.7452e-05	C3	CEBPZ
DDX55	4.68417e-09	0.0345267	1	0.999	3.9689e-05	C3	DDX55
RBAK	5.60671e-09	0.0422738	1	0.998	4.75057e-05	C3	RBAK
ZNF562	5.65142e-09	0.0267568	1	1	4.78844e-05	C3	ZNF562
CDK4	5.70123e-09	0.0291334	1	1	4.83065e-05	C3	CDK4
ACTR1B	5.70838e-09	0.0447254	0.998	0.995	4.83671e-05	C3	ACTR1B
TRAF3IP3	6.32017e-09	0.025904	1	0.999	5.35508e-05	C3	TRAF3IP3
LCK	7.14829e-09	0.0521908	1	0.998	6.05675e-05	C3	LCK
PPIE	7.60416e-09	0.0326353	1	1	6.44301e-05	C3	PPIE
EXOSC6	8.04485e-09	0.0288843	1	1	6.81641e-05	C3	EXOSC6
CYFIP2	8.59871e-09	0.0353162	1	1	7.28569e-05	C3	CYFIP2
ABCB10	9.0803e-09	0.0403519	0.998	0.994	7.69374e-05	C3	ABCB10
RSL1D1	9.34622e-09	0.0308483	0.998	0.999	7.91906e-05	C3	RSL1D1
NCL	1.12456e-08	0.0310986	1	1	9.52843e-05	C3	NCL
SLC39A8	1.20173e-08	0.0341883	1	0.994	0.000101823	C3	SLC39A8
EIF2S1	1.21161e-08	0.0313688	1	0.998	0.00010266	C3	EIF2S1
PCSK7	1.27567e-08	0.044753	1	0.999	0.000108087	C3	PCSK7
MFNG	1.28194e-08	0.0245909	0.996	0.997	0.000108619	C3	MFNG
TTC13	1.28824e-08	0.0350787	1	0.999	0.000109152	C3	TTC13
FASN	1.31159e-08	0.0494203	0.998	0.995	0.000111131	C3	FASN
TRRAP	1.38755e-08	0.0295962	1	0.999	0.000117567	C3	TRRAP
TPP2	1.50649e-08	0.0359059	1	1	0.000127645	C3	TPP2
DNAJC9	1.69472e-08	0.0267162	1	1	0.000143594	C3	DNAJC9
PPM1K	1.81989e-08	0.0542316	1	0.999	0.000154199	C3	PPM1K
MRPS7	1.92894e-08	0.0104367	0.998	0.999	0.000163439	C3	MRPS7
CHD1L	2.23633e-08	0.0422076	0.998	0.994	0.000189484	C3	CHD1L
WDR611	2.43601e-08	0.0088786	1	1	0.000206403	C3	WDR61
PSMD14	2.43797e-08	0.0211695	1	0.998	0.000206569	C3	PSMD14
GOT2	2.67106e-08	0.0351093	1	0.998	0.000226319	C3	GOT2
NUP210	2.67747e-08	0.04392	1	0.999	0.000226862	C3	NUP210
MRPS27	2.99655e-08	0.0268207	0.998	0.998	0.000253897	C3	MRPS27
POMT1	3.08866e-08	0.0300682	1	0.999	0.000261702	C3	POMT1
RSAD1	3.3684e-08	0.0479154	0.998	0.997	0.000285404	C3	RSAD1
SF3A3	3.51315e-08	0.0228162	1	1	0.000297669	C3	SF3A3
KLRB1	3.63932e-08	0.0606748	1	1	0.00030836	C3	KLRB1
NPC1	3.90809e-08	0.0293596	0.998	0.997	0.000331132	C3	NPC1
MRPL38	4.07687e-08	0.035967	0.998	0.994	0.000345433	C3	MRPL38
FH	4.08009e-08	0.0288845	1	0.997	0.000345706	C3	FH
CX3CR1	4.09462e-08	0.0292474	1	1	0.000346937	C3	CX3CR1
SLC2A4RG	4.17127e-08	0.0485745	0.996	0.991	0.000353432	C3	SLC2A4RG
SIT1	4.51698e-08	0.0516987	0.996	0.998	0.000382724	C3	SIT1
IPO9	4.61037e-08	0.0398115	1	0.998	0.000390637	C3	IPO9
BRD9	4.81035e-08	0.0187749	1	0.999	0.000407581	C3	BRD9
NUP133	5.21129e-08	0.0221795	1	0.998	0.000441552	C3	NUP133
CALM1	5.32898e-08	0.0222416	1	1	0.000451525	C3	CALM1
CD81	5.52656e-08	0.0187017	0.996	0.995	0.000468265	C3	CD81
CTSW	5.75367e-08	0.0491125	1	0.999	0.000487509	C3	CTSW
ATF1	5.81469e-08	0.0191158	1	0.999	0.000492678	C3	ATF1
PLCG1	6.37537e-08	0.0681848	1	0.999	0.000540185	C3	PLCG1
MRPS18B	6.38514e-08	0.0193863	0.986	0.988	0.000541013	C3	MRPS18B
GIPC1	6.41023e-08	0.0347114	0.998	0.998	0.000543139	C3	GIPC1
MSH6	6.6491e-08	0.0107827	1	0.999	0.000563378	C3	MSH6
SMYD3	6.98286e-08	0.0319552	0.998	1	0.000591657	C3	SMYD3
CNOT6	7.22272e-08	0.0287339	1	0.999	0.000611981	C3	CNOT6
CRIP1	7.2818e-08	0.0312037	0.998	0.997	0.000616987	C3	CRIP1
SNRPD2	7.60784e-08	0.0204473	1	0.999	0.000644612	C3	SNRPD2
NKTR	7.91425e-08	0.0272662	1	1	0.000670574	C3	NKTR
DDX56	8.09691e-08	0.0322149	0.998	0.994	0.000686051	C3	DDX56
ST6GAL1	8.10317e-08	0.0464288	1	1	0.000686582	C3	ST6GAL1
SNRPA1	8.4942e-08	0.0269515	1	0.999	0.000719714	C3	SNRPA1
ISOC1	9.10819e-08	0.0292725	1	1	0.000771737	C3	ISOC1
FANCF	9.28166e-08	0.0526273	1	0.995	0.000786435	C3	FANCF
RPS6KB1	9.51306e-08	0.0181631	1	1	0.000806042	C3	RPS6KB1
CPSF4	9.73507e-08	0.0138901	1	1	0.000824852	C3	CPSF4
POFUT1	9.93152e-08	0.0356286	1	0.991	0.000841498	C3	POFUT1
EIF4A2	1.00543e-07	0.0225446	1	1	0.000851902	C3	EIF4A2
BPNT1	1.0062e-07	0.019791	1	0.997	0.000852557	C3	BPNT1
RPL5	1.01163e-07	0.0416089	1	1	0.000857151	C3	RPL5
POLR1C1	1.12535e-07	0.0303547	1	1	0.000953506	C3	POLR1C
ITPA	1.12966e-07	0.0245954	1	0.999	0.00095716	C3	ITPA
CIRBP	1.20962e-07	0.0228743	1	1	0.00102491	C3	CIRBP
THUMPD1	1.26482e-07	0.0243194	0.998	0.999	0.00107168	C3	THUMPD1
SLC5A6	1.27062e-07	0.019136	1	1	0.00107659	C3	SLC5A6
MTA1	1.3458e-07	0.0284047	0.998	1	0.00114029	C3	MTA1
USP16	1.3758e-07	0.029274	1	0.998	0.00116572	C3	USP16
DDX19B	1.38525e-07	0.012266	1	0.999	0.00117372	C3	DDX19B
LLGL1	1.48263e-07	0.0310688	1	1	0.00125623	C3	LLGL1
GIMAP6	1.49391e-07	0.0271606	0.998	0.998	0.00126579	C3	GIMAP6
CASP6	1.55747e-07	0.00824619	1	1	0.00131965	C3	CASP6
TCEAL8	1.71762e-07	0.0334703	0.996	0.997	0.00145534	C3	TCEAL8
YEATS4	1.79644e-07	0.0576297	0.998	0.997	0.00152212	C3	YEATS4
GTF2H4	1.8271e-07	0.0296905	0.988	0.985	0.0015481	C3	GTF2H4
PIN1	1.91801e-07	0.0171201	1	0.997	0.00162513	C3	PIN1
KLHL7	1.98099e-07	0.021978	1	1	0.00167849	C3	KLHL7
IL10RA	2.06757e-07	0.0240414	1	1	0.00175185	C3	IL10RA
DDX27	2.14571e-07	0.0288161	0.998	0.999	0.00181806	C3	DDX27
RPS27	2.24175e-07	0.0319829	1	0.999	0.00189943	C3	RPS27
MCCC11	2.29774e-07	0.0306151	0.998	0.993	0.00194688	C3	MCCC1
ZNF266	2.41381e-07	0.0390559	1	1	0.00204522	C3	ZNF266
HINT1	2.43733e-07	0.0279944	1	1	0.00206515	C3	HINT1
DSTN	2.44461e-07	0.0225313	1	1	0.00207132	C3	DSTN
NDUFS31	2.47579e-07	0.00874506	1	0.999	0.00209774	C3	NDUFS3
CCDC6	2.51859e-07	0.0105616	1	0.999	0.002134	C3	CCDC6
SMARCE1	2.79181e-07	0.0250525	1	1	0.0023655	C3	SMARCE1
ATM	2.81888e-07	0.0457989	1	1	0.00238844	C3	ATM
RBMX	2.88552e-07	0.0352468	1	0.998	0.00244491	C3	RBMX
THUMPD3	3.05038e-07	0.0316216	1	0.999	0.00258459	C3	THUMPD3
RBM17	3.11884e-07	0.0231922	1	1	0.00264259	C3	RBM17
ADD3	3.15362e-07	0.0210557	1	0.999	0.00267206	C3	ADD3
EIF4B	3.15595e-07	0.0267337	1	0.999	0.00267404	C3	EIF4B
CLN8	3.57757e-07	0.0299957	1	0.997	0.00303127	C3	CLN8
RNF126	3.57757e-07	0.0368129	1	1	0.00303127	C3	RNF126
TPM2	3.72798e-07	0.0334408	0.998	0.992	0.00315872	C3	TPM2
ABLIM1	3.74722e-07	0.0675938	1	0.999	0.00317502	C3	ABLIM1
PURA	3.88166e-07	0.027787	1	0.999	0.00328893	C3	PURA
PGBD2	3.88451e-07	0.0206549	0.994	0.997	0.00329134	C3	PGBD2
MRPS6	4.17533e-07	0.0146653	1	0.998	0.00353776	C3	MRPS6
PPOX1	4.36745e-07	0.0294423	1	0.998	0.00370054	C3	PPOX
ILF3	4.54314e-07	0.0469231	1	1	0.0038494	C3	ILF3
MRPL19	4.55975e-07	0.0261739	1	1	0.00386347	C3	MRPL19
ZNF589	4.56308e-07	0.0363562	1	1	0.0038663	C3	ZNF589
RPS4X	4.63015e-07	0.041372	1	1	0.00392312	C3	RPS4X
PMPCA	4.64029e-07	0.0207962	1	1	0.00393172	C3	PMPCA
RPP38	4.64367e-07	0.0196838	0.998	0.999	0.00393458	C3	RPP38
SET	4.876e-07	0.0250198	1	1	0.00413144	C3	SET
BOLA1	4.89378e-07	0.0135338	0.998	0.995	0.0041465	C3	BOLA1
VEGFB	5.02912e-07	0.0400761	0.994	0.992	0.00426118	C3	VEGFB
UHMK1	5.07506e-07	0.0408271	1	0.998	0.0043001	C3	UHMK1
DUSP2	5.08796e-07	0.0381774	0.992	0.989	0.00431103	C3	DUSP2
CROCC	5.35918e-07	0.0434044	0.998	0.994	0.00454083	C3	CROCC
GRWD1	5.3767e-07	0.0371363	0.998	0.995	0.00455568	C3	GRWD1
RYK1	5.3982e-07	0.0197764	1	1	0.00457389	C3	RYK
HLA-DOB	5.5328e-07	0.0252991	0.986	0.988	0.00468794	C3	HLA-DOB
IMP4	5.69766e-07	0.0197576	0.996	0.998	0.00482762	C3	IMP4
SHMT2	5.77864e-07	0.0274442	0.998	0.993	0.00489624	C3	SHMT2
MCM3AP	5.83747e-07	0.0205648	0.998	0.999	0.00494609	C3	MCM3AP
RABGGTB	5.91396e-07	0.0179856	1	1	0.0050109	C3	RABGGTB
IMPDH2	5.99141e-07	0.0336586	1	1	0.00507652	C3	IMPDH2
RFXAP	6.06545e-07	0.0473619	1	0.997	0.00513926	C3	RFXAP
LEPROTL1	6.08081e-07	0.0255459	0.998	0.999	0.00515227	C3	LEPROTL1
CAND1	7.10695e-07	0.0376346	1	1	0.00602172	C3	CAND1
CDKN1C1	7.1146e-07	0.0386592	0.994	0.995	0.0060282	C3	CDKN1C
NFATC3	7.3772e-07	0.0435412	1	0.997	0.0062507	C3	NFATC3
HSPA14	7.45698e-07	0.0321317	1	0.999	0.0063183	C3	HSPA14
RPL4	7.96479e-07	0.0441728	1	1	0.00674857	C3	RPL4
CCT3	8.68359e-07	0.036188	1	1	0.0073576	C3	CCT3
ESCO1	8.92194e-07	0.0263589	1	1	0.00755956	C3	ESCO1
LPXN	8.9985e-07	0.013688	0.998	1	0.00762443	C3	LPXN
TOB1	9.03703e-07	0.0251146	0.998	1	0.00765707	C3	TOB1
DNAJC10	9.13402e-07	0.0350355	1	0.999	0.00773926	C3	DNAJC10
PRDX1	9.21562e-07	0.0190002	0.998	0.998	0.0078084	C3	PRDX1
LGMN	9.22218e-07	0.0288365	1	0.998	0.00781395	C3	LGMN
TUBB	9.2647e-07	0.029015	0.986	0.986	0.00784998	C3	TUBB
CERK	9.60009e-07	0.0247008	1	1	0.00813416	C3	CERK
GOLGA3	9.73741e-07	0.0306169	0.996	0.994	0.0082505	C3	GOLGA3
NFX1	1.06998e-06	0.0235561	0.996	0.999	0.00906596	C3	NFX1
DEXI	1.10848e-06	0.0297791	1	1	0.00939214	C3	DEXI
BTG3	1.13341e-06	0.0319007	0.998	0.999	0.00960341	C3	BTG3
ITGA4	1.16298e-06	0.0376928	1	1	0.00985393	C3	ITGA4
LSM4	1.18784e-06	0.0202817	1	1	0.0100645	C3	LSM4
SUSD3	1.18825e-06	0.0283718	0.998	0.998	0.0100681	C3	SUSD3
NUDT9	1.18867e-06	0.0063171	0.998	0.998	0.0100716	C3	NUDT9
GOPC	1.2192e-06	0.0264494	0.998	0.999	0.0103302	C3	GOPC
EIF2A	1.29284e-06	0.0415503	0.974	0.963	0.0109542	C3	EIF2A
CSNK1E	1.32648e-06	0.042172	0.996	0.997	0.0112392	C3	CSNK1E
ANP32B	1.34051e-06	0.00469688	1	1	0.0113581	C3	ANP32B
RUVBL1	1.34994e-06	0.0324976	1	1	0.0114381	C3	RUVBL1
PUM1	1.43777e-06	0.00944303	0.998	1	0.0121823	C3	PUM1
ASXL1	1.47752e-06	0.0365794	1	1	0.012519	C3	ASXL1
SCMH1	1.51831e-06	0.0352781	0.996	0.993	0.0128647	C3	SCMH1
DDX21	1.53858e-06	0.023084	0.996	0.999	0.0130364	C3	DDX21
TCL1A	1.57989e-06	0.0730785	0.996	0.993	0.0133864	C3	TCL1A
ORMDL1	1.59316e-06	0.0244841	0.998	0.999	0.0134989	C3	ORMDL1
PDE6B	1.6393e-06	0.0242662	0.998	0.999	0.0138898	C3	PDE6B
YPEL1	1.68204e-06	0.0392375	0.998	0.998	0.014252	C3	YPEL1
MAPK9	2.166e-06	0.0213084	1	0.999	0.0183525	C3	MAPK9
HMGN3	2.47545e-06	0.020267	1	0.998	0.0209745	C3	HMGN3
CDC14A	2.55287e-06	0.0427486	1	0.997	0.0216305	C3	CDC14A
SEMA4C	2.55636e-06	0.0306059	0.998	0.999	0.0216601	C3	SEMA4C
CLC	2.56775e-06	0.0290858	1	1	0.0217566	C3	CLC
SHMT1	2.59067e-06	0.025537	1	0.998	0.0219508	C3	SHMT1
KLF11	2.62005e-06	0.032874	1	0.998	0.0221997	C3	KLF11
MTX2	2.78315e-06	0.0352794	0.996	0.999	0.0235816	C3	MTX2
BLNK	2.80123e-06	0.0304921	1	0.998	0.0237348	C3	BLNK
SSB	2.83965e-06	0.0181731	0.998	1	0.0240603	C3	SSB
EXOSC7	2.84158e-06	0.0277126	1	0.999	0.0240767	C3	EXOSC7
CDK2	2.85225e-06	0.0156513	0.996	1	0.0241671	C3	CDK2
RNPS1	2.88054e-06	0.0313093	1	0.998	0.0244068	C3	RNPS1
IL23A	2.93494e-06	0.0502906	0.998	0.992	0.0248677	C3	IL23A
ZNHIT2	2.966e-06	0.0187938	0.99	0.986	0.0251309	C3	ZNHIT2
SQLE	3.06643e-06	0.0267648	1	0.999	0.0259818	C3	SQLE
PJA1	3.31948e-06	0.0332432	0.996	0.991	0.028126	C3	PJA1
PTBP1	3.40591e-06	0.0066978	1	1	0.0288583	C3	PTBP1
EEF2	3.40821e-06	0.0167434	0.998	1	0.0288778	C3	EEF2
RPL36	3.45225e-06	0.0262496	1	1	0.029251	C3	RPL36
SIRT1	3.56596e-06	0.0141022	0.998	1	0.0302144	C3	SIRT1
HLA-DOA	3.73188e-06	0.0322446	0.986	0.988	0.0316202	C3	HLA-DOA
MRPL15	3.8222e-06	0.0225833	0.996	0.994	0.0323855	C3	MRPL15
DNAJC8	3.95154e-06	0.00922292	0.998	1	0.0334814	C3	DNAJC8
TRAF4	4.13191e-06	0.0399418	0.998	0.995	0.0350097	C3	TRAF4
DNM1L	4.30429e-06	0.0189735	0.998	0.999	0.0364702	C3	DNM1L
MLLT11	4.35645e-06	0.0294415	1	0.998	0.0369122	C3	MLLT11
TBCD	4.74211e-06	0.0192651	1	1	0.0401799	C3	TBCD
IL11RA	4.82018e-06	0.046513	0.996	0.994	0.0408414	C3	IL11RA
FOSB	4.947e-06	0.0412661	0.998	0.997	0.0419159	C3	FOSB
PPP1R2	5.03834e-06	0.0242322	1	0.999	0.0426898	C3	PPP1R2
GLMN	5.11257e-06	0.0320258	0.998	0.997	0.0433188	C3	GLMN
SF3B3	5.1535e-06	0.0399565	1	1	0.0436656	C3	SF3B3
GALNT11	5.44892e-06	0.0195014	0.998	0.998	0.0461687	C3	GALNT11
SWAP70	5.55095e-06	0.026987	1	1	0.0470332	C3	SWAP70
RPS15A	5.56936e-06	0.0340102	1	1	0.0471892	C3	RPS15A
EDF1	5.6175e-06	0.00372895	1	1	0.0475971	C3	EDF1
MBTPS1	5.78724e-06	0.0281926	1	0.999	0.0490353	C3	MBTPS1
ZW10	6.00136e-06	0.0304651	1	0.993	0.0508495	C3	ZW10
PHTF2	6.00533e-06	0.0432369	1	0.998	0.0508831	C3	PHTF2
NDUFV1	6.03314e-06	0.0187324	0.998	0.998	0.0511188	C3	NDUFV1
ZNF511	6.07908e-06	0.00520411	0.992	0.994	0.051508	C3	ZNF511
RPL13	6.23538e-06	0.0400918	1	1	0.0528324	C3	RPL13
DHCR7	6.65074e-06	0.0149626	0.99	0.995	0.0563517	C3	DHCR7
TFB2M	6.66825e-06	0.0354721	1	0.997	0.0565001	C3	TFB2M
DDX28	6.94071e-06	0.0126955	0.996	0.998	0.0588087	C3	DDX28
YAF2	6.96808e-06	0.020083	0.998	0.997	0.0590406	C3	YAF2
XRCC6	6.99097e-06	0.0130032	1	0.997	0.0592345	C3	XRCC6
WDR46	7.0046e-06	0.0252931	0.986	0.988	0.0593499	C3	WDR46
SRP9	7.04157e-06	0.00989944	1	1	0.0596632	C3	SRP9
KTN1	7.74977e-06	0.0390109	1	0.999	0.0656638	C3	KTN1
CHD9	7.92103e-06	0.0328822	1	1	0.0671149	C3	CHD9
MRPL46	8.14614e-06	0.0360098	0.996	0.993	0.0690223	C3	MRPL46
PSIP1	8.21274e-06	0.0350455	1	0.998	0.0695865	C3	PSIP1
TMEM421	9.28812e-06	0.0117086	0.996	0.998	0.0786982	C3	TMEM42
ARHGEF18	9.77507e-06	0.00752208	0.998	1	0.0828242	C3	ARHGEF18
VDAC1	1.00244e-05	0.0140647	1	0.999	0.0849364	C3	VDAC1
SGPP1	1.03662e-05	0.028213	1	0.999	0.0878329	C3	SGPP1
USP5	1.06916e-05	0.0341045	0.998	0.992	0.09059	C3	USP5
CHCHD7	1.08301e-05	0.00907994	1	0.999	0.0917632	C3	CHCHD7
GNL2	1.0935e-05	0.0128604	1	1	0.0926525	C3	GNL2
SUMF2	1.09773e-05	0.0287938	0.998	0.999	0.0930105	C3	SUMF2
HCFC1	1.09843e-05	0.0149073	1	1	0.0930703	C3	HCFC1
FCRL1	1.1002e-05	0.0562275	0.998	0.995	0.09322	C3	FCRL1
MAD2L1	1.11765e-05	0.0513621	0.996	0.984	0.0946988	C3	MAD2L1
ALG5	1.17086e-05	0.0316687	0.998	0.999	0.0992073	C3	ALG5
RASSF1	1.17651e-05	0.0338132	1	0.999	0.0996853	C3	RASSF1
ELAVL1	1.24704e-05	0.0326715	0.998	0.999	0.105662	C3	ELAVL1
ITGB1BP1	1.24944e-05	0.0192909	1	1	0.105865	C3	ITGB1BP1
THAP11	1.25744e-05	0.0121237	0.998	0.998	0.106543	C3	THAP11
SYNCRIP	1.28504e-05	0.0265793	1	1	0.108881	C3	SYNCRIP
DNAJC18	1.45849e-05	0.0281516	0.998	0.999	0.123578	C3	DNAJC18
MTF2	1.48792e-05	0.0155957	1	1	0.126071	C3	MTF2
CCT7	1.57067e-05	0.0169145	1	0.999	0.133083	C3	CCT7
TNFRSF10A	1.57266e-05	0.0122654	0.998	0.999	0.133251	C3	TNFRSF10A
UBE2V2	1.63031e-05	0.0111274	0.998	1	0.138136	C3	UBE2V2
NDUFB8	1.67249e-05	0.00858456	0.998	0.993	0.14171	C3	NDUFB8
CCNG1	1.79182e-05	0.0277655	0.998	1	0.151821	C3	CCNG1
DCK	1.8478e-05	0.0330218	1	1	0.156564	C3	DCK
SRP68	1.8641e-05	0.0224804	0.998	0.998	0.157945	C3	SRP68
XPO1	1.90068e-05	0.0292166	1	1	0.161044	C3	XPO1
PPP1CC	1.92826e-05	0.00277825	1	1	0.163381	C3	PPP1CC
ERH	1.93249e-05	0.015093	1	1	0.16374	C3	ERH
ZMYND11	2.02972e-05	0.0558576	1	0.998	0.171978	C3	ZMYND11
DUS4L	2.07068e-05	0.0384506	0.998	0.988	0.175448	C3	DUS4L
ATP1A1	2.07585e-05	0.0240462	1	0.999	0.175887	C3	ATP1A1
SPAG7	2.15362e-05	0.00210723	0.998	1	0.182476	C3	SPAG7
HSPA8	2.1874e-05	0.0241523	1	1	0.185339	C3	HSPA8
FBXL17	2.32332e-05	0.0136212	1	0.999	0.196855	C3	FBXL17
RPS29	2.32621e-05	0.0271177	0.998	0.999	0.1971	C3	RPS29
TOMM22	2.40839e-05	0.0105929	0.998	1	0.204063	C3	TOMM22
NCBP2	2.41437e-05	0.0307891	1	0.999	0.204569	C3	NCBP2
PPIA	2.46649e-05	0.0404437	0.998	1	0.208986	C3	PPIA
PPP3CB	2.64725e-05	0.0185929	1	1	0.224302	C3	PPP3CB
ZBED4	2.91032e-05	0.0282474	0.998	0.998	0.246591	C3	ZBED4
OGT	2.91479e-05	0.0209614	1	1	0.24697	C3	OGT
GIMAP1	3.09804e-05	0.0146016	1	1	0.262497	C3	GIMAP1
ABI3	3.18252e-05	0.0280531	1	1	0.269655	C3	ABI3
SLC35A3	3.22755e-05	0.0229152	0.998	1	0.27347	C3	SLC35A3
TSPAN13	3.22755e-05	0.0490582	1	0.998	0.27347	C3	TSPAN13
POLR2K	3.23544e-05	0.0394142	1	0.993	0.274139	C3	POLR2K
IMMT	3.2652e-05	0.0196228	1	1	0.27666	C3	IMMT
APOBEC3D	3.30528e-05	0.0311284	0.998	0.999	0.280057	C3	APOBEC3D
AAK1	3.4409e-05	0.00629295	0.998	1	0.291548	C3	AAK1
CBFB	3.45139e-05	0.0262814	0.998	0.999	0.292436	C3	CBFB
FANCE	3.49576e-05	0.0276456	0.994	0.993	0.296196	C3	FANCE
TMEM44	3.50855e-05	0.0230653	0.996	0.994	0.297279	C3	TMEM44
UQCRB	3.51816e-05	0.0256417	0.998	0.998	0.298094	C3	UQCRB
SART3	3.75537e-05	0.0324135	1	0.998	0.318193	C3	SART3
PIGO	3.7977e-05	0.0290741	0.998	0.992	0.321779	C3	PIGO
PPARA	3.83351e-05	0.0342691	1	0.997	0.324813	C3	PPARA
EBNA1BP21	3.88136e-05	0.0175407	1	0.998	0.328868	C3	EBNA1BP2
TMEM9	3.91792e-05	0.0267577	0.998	0.997	0.331965	C3	TMEM9
SRRM1	4.29934e-05	0.019487	1	1	0.364283	C3	SRRM1
TAF4	4.37237e-05	0.0135461	0.998	0.999	0.370471	C3	TAF4
SLC30A5	4.37237e-05	0.0246112	1	1	0.370471	C3	SLC30A5
MRPS31	4.41197e-05	0.0291795	1	1	0.373826	C3	MRPS31
RPL17	4.46665e-05	0.0414516	1	1	0.378459	C3	RPL17
HCST	4.51383e-05	0.0109412	1	1	0.382457	C3	HCST
COX5A1	4.75266e-05	0.00680806	0.996	0.999	0.402693	C3	COX5A
DHX33	4.76548e-05	0.0161728	1	1	0.403779	C3	DHX33
MGAT4A	4.80414e-05	0.0339179	0.998	1	0.407055	C3	MGAT4A
UFC1	4.81277e-05	0.0162877	0.998	0.998	0.407786	C3	UFC1
ZNF197	4.83297e-05	0.0236087	0.996	0.995	0.409497	C3	ZNF197
PTPN11	4.97364e-05	0.0199794	1	1	0.421417	C3	PTPN11
MRPS15	5.12124e-05	0.0155008	0.998	0.998	0.433923	C3	MRPS15
ZNF3	5.19195e-05	0.0305264	1	0.998	0.439914	C3	ZNF3
ZNF12	5.7202e-05	0.0158723	1	0.999	0.484672	C3	ZNF12
TTC14	6.09962e-05	0.0114785	0.998	0.998	0.516821	C3	TTC14
MRPL1	6.11586e-05	0.0683599	0.998	0.967	0.518197	C3	MRPL1
MARCKSL1	6.21233e-05	0.0184468	0.998	0.999	0.52637	C3	MARCKSL1
GNB5	6.34382e-05	0.0148825	1	1	0.537512	C3	GNB5
SOD11	6.51428e-05	0.00131812	1	1	0.551955	C3	SOD1
PIGC	6.63423e-05	0.0139009	1	1	0.562118	C3	PIGC
RPS26	7.0977e-05	0.0311994	0.998	0.999	0.601388	C3	RPS26
HSD17B8	7.52094e-05	0.0327301	0.984	0.986	0.637249	C3	HSD17B8
NAT9	7.58282e-05	0.0173467	0.998	0.995	0.642492	C3	NAT9
MLH3	7.64952e-05	0.030845	0.998	0.999	0.648144	C3	MLH3
RPL23A	8.0241e-05	0.0349024	1	1	0.679882	C3	RPL23A
MDH2	8.06155e-05	0.0118602	0.998	1	0.683055	C3	MDH2
IVD	8.10625e-05	0.0342518	0.998	0.998	0.686842	C3	IVD
PSMC2	8.65366e-05	0.00928651	1	1	0.733225	C3	PSMC2
CNOT7	8.79015e-05	0.0160865	1	1	0.744789	C3	CNOT7
WRNIP1	9.22255e-05	0.0150786	0.998	0.999	0.781427	C3	WRNIP1
MPI	9.22788e-05	0.0349622	1	1	0.781878	C3	MPI
MUS81	9.40813e-05	0.0143519	1	1	0.797151	C3	MUS81
SIGIRR	9.78428e-05	0.039526	0.998	0.999	0.829022	C3	SIGIRR
ABCF1	9.80952e-05	0.0152676	0.986	0.988	0.831161	C3	ABCF1
NFATC2IP	9.92896e-05	0.0324438	0.998	1	0.841281	C3	NFATC2IP
ELAC2	0.000109401	0.0260054	0.998	0.993	0.926955	C3	ELAC2
YARS2	0.000112639	0.0205249	0.998	0.998	0.954386	C3	YARS2
ERCC3	0.000116496	0.0156413	1	0.998	0.987074	C3	ERCC3
DDX46	0.000119047	0.0184137	1	0.999	1	C3	DDX46
CDK10	0.000124059	0.0202883	1	1	1	C3	CDK10
HECTD1	0.0001296	0.0157158	0.998	1	1	C3	HECTD1
PRPF31	0.000134799	0.0139848	0.988	0.986	1	C3	PRPF31
CCT6A	0.000138078	0.021817	1	1	1	C3	CCT6A
CKB	0.000143477	0.0321826	0.992	0.991	1	C3	CKB
CCT8	0.000143922	0.00792502	1	1	1	C3	CCT8
KCNN4	0.000144532	0.0355703	0.998	0.994	1	C3	KCNN4
RPS23	0.000148907	0.0412635	1	1	1	C3	RPS23
CYP4V2	0.000152463	0.0480978	1	0.994	1	C3	CYP4V2
RP9	0.000153493	0.0246106	0.998	0.995	1	C3	RP9
ADNP	0.000154921	0.0265569	0.998	0.997	1	C3	ADNP
MBNL1	0.000156054	0.0296918	0.998	0.999	1	C3	MBNL1
SCAMP3	0.000158389	0.0176703	0.996	0.994	1	C3	SCAMP3
SPG7	0.000163204	0.0327928	1	0.999	1	C3	SPG7
PTER	0.000164073	0.0266284	1	0.998	1	C3	PTER
PYCR2	0.000171711	0.0128075	1	0.999	1	C3	PYCR2
PPP1R8	0.00017243	0.0330022	1	0.999	1	C3	PPP1R8
HS3ST3B1	0.000172959	0.0358034	1	1	1	C3	HS3ST3B1
CUL2	0.0001748	0.00418091	1	1	1	C3	CUL2
SLC25A16	0.000177151	0.0144759	0.998	0.998	1	C3	SLC25A16
RWDD1	0.000177348	0.0299423	1	1	1	C3	RWDD1
MRPS16	0.000185668	0.0135655	0.998	0.999	1	C3	MRPS16
RPS6	0.000186442	0.0260342	1	1	1	C3	RPS6
LRFN4	0.000192851	0.0216415	0.986	0.989	1	C3	LRFN4
SS18L1	0.000195973	0.00810902	0.998	1	1	C3	SS18L1
TAF6L	0.000200133	0.022509	1	1	1	C3	TAF6L
SS18L2	0.000200797	0.0226896	1	0.999	1	C3	SS18L2
CCT4	0.000207327	0.0243337	1	0.999	1	C3	CCT4
PITRM1	0.000211597	0.0113533	1	1	1	C3	PITRM1
TNFAIP8	0.000212648	0.0338496	1	1	1	C3	TNFAIP8
ADAM23	0.000216721	0.0515644	0.966	0.924	1	C3	ADAM23
FAF1	0.000216781	0.0163831	0.998	0.994	1	C3	FAF1
COPZ1	0.000222085	0.0168487	1	0.999	1	C3	COPZ1
HMGCS1	0.000222085	0.0288711	1	1	1	C3	HMGCS1
PRKCE	0.000230585	0.0209182	0.996	0.994	1	C3	PRKCE
DET1	0.000244141	0.0253078	0.99	0.99	1	C3	DET1
PORCN	0.000250342	0.0185771	0.99	0.99	1	C3	PORCN
MRPL39	0.000255717	0.0318457	0.998	0.995	1	C3	MRPL39
GTF3C2	0.000264482	0.0230052	1	1	1	C3	GTF3C2
TRAF2	0.000269847	0.0246887	1	1	1	C3	TRAF2
MAPRE2	0.00027014	0.0153549	1	0.999	1	C3	MAPRE2
GNL1	0.000270283	0.00749423	0.988	0.988	1	C3	GNL1
RFWD3	0.00027442	0.0154389	1	0.999	1	C3	RFWD3
CRBN	0.000275462	0.0220524	0.998	1	1	C3	CRBN
PRNP	0.00027591	0.012212	0.998	0.999	1	C3	PRNP
PNN	0.000276134	0.0224215	0.998	0.998	1	C3	PNN
PHF19	0.000293447	0.0355272	1	0.997	1	C3	PHF19
POGK	0.000294875	0.00312804	0.998	1	1	C3	POGK
TAF1C	0.000297911	0.0357169	0.998	1	1	C3	TAF1C
ERN1	0.000305713	0.0255275	0.998	0.997	1	C3	ERN1
POLD1	0.000312359	0.0258007	0.998	0.992	1	C3	POLD1
MYCBP2	0.000327988	0.0135942	0.998	0.998	1	C3	MYCBP2
RAB28	0.00032922	0.010288	1	0.999	1	C3	RAB28
CPSF6	0.000329573	0.0335678	0.998	0.998	1	C3	CPSF6
OPTN	0.000336254	0.0196101	1	1	1	C3	OPTN
UXT	0.000345913	0.0105715	0.998	0.999	1	C3	UXT
GALT	0.000349905	0.0118447	1	0.998	1	C3	GALT
MCM5	0.000351868	0.0290442	0.994	0.989	1	C3	MCM5
POU2AF1	0.000353939	0.026742	0.998	0.998	1	C3	POU2AF1
MAPK6	0.000379781	0.0173396	0.994	0.999	1	C3	MAPK6
ZNF696	0.000405124	0.0225402	1	0.999	1	C3	ZNF696
RGS9	0.000406303	0.0253022	0.992	0.992	1	C3	RGS9
DAG1	0.000414208	0.0125134	0.998	0.998	1	C3	DAG1
PREP	0.000433634	0.0156474	0.998	0.997	1	C3	PREP
MRPL37	0.000440296	0.00765632	1	0.995	1	C3	MRPL37
SEC61A1	0.000450114	0.00797427	1	1	1	C3	SEC61A1
ZNF490	0.000453076	0.00795767	1	0.997	1	C3	ZNF490
TRAPPC4	0.000459414	0.016792	1	1	1	C3	TRAPPC4
NDUFA5	0.000461827	0.0446327	1	0.997	1	C3	NDUFA5
PHB2	0.000465957	0.0138448	1	1	1	C3	PHB2
QPCTL	0.000470859	0.0181195	0.998	0.998	1	C3	QPCTL
RPL8	0.000494809	0.025111	1	1	1	C3	RPL8
ORMDL3	0.000509455	0.0414932	1	0.997	1	C3	ORMDL3
PRPF19	0.000509984	0.0258812	0.996	0.993	1	C3	PRPF19
PIK3C2A	0.000513713	0.0193772	0.998	0.999	1	C3	PIK3C2A
CHMP7	0.000520027	0.036923	0.998	1	1	C3	CHMP7
RPL11	0.000520703	0.0113479	1	1	1	C3	RPL11
YIF1A	0.000528329	0.0220595	0.994	0.991	1	C3	YIF1A
TTC5	0.000543897	0.00627905	0.998	0.999	1	C3	TTC5
BAZ1B	0.000548564	0.0283189	1	0.997	1	C3	BAZ1B
MTDH	0.000576767	0.00390955	1	1	1	C3	MTDH
PSMC3	0.000580049	0.0127843	0.996	0.994	1	C3	PSMC3
AQP3	0.000588481	0.0450967	0.996	0.993	1	C3	AQP3
TBRG4	0.000593505	0.0277313	1	0.995	1	C3	TBRG4
ANXA6	0.00060243	0.0432841	1	0.998	1	C3	ANXA6
PEPD	0.000604136	0.013248	0.998	0.993	1	C3	PEPD
EEF1B2	0.000605225	0.0387269	1	1	1	C3	EEF1B2
IARS2	0.000606939	0.022925	1	0.998	1	C3	IARS2
ODF2	0.000625291	0.0333301	0.996	0.997	1	C3	ODF2
RPS21	0.000629636	0.016799	1	1	1	C3	RPS21
SSBP1	0.000647299	0.0107983	1	1	1	C3	SSBP1
REPS1	0.00065731	0.0227559	1	0.999	1	C3	REPS1
PLCD1	0.00067122	0.0194941	0.99	0.988	1	C3	PLCD1
WDR181	0.000681576	0.0134005	0.992	0.992	1	C3	WDR18
MRPL141	0.000699877	0.0163314	0.994	0.997	1	C3	MRPL14
INSIG1	0.000700769	0.0120002	1	0.999	1	C3	INSIG1
NDUFS81	0.000714082	0.00901006	1	1	1	C3	NDUFS8
PLEKHG2	0.000739727	0.0382062	0.998	0.999	1	C3	PLEKHG2
SH3GLB2	0.00075928	0.028404	0.998	0.997	1	C3	SH3GLB2
TM2D2	0.000768749	0.0151572	1	0.999	1	C3	TM2D2
SLC39A6	0.000805699	0.0222337	1	0.999	1	C3	SLC39A6
ZNF664	0.000822093	0.0341135	1	0.999	1	C3	ZNF664
TTC17	0.000827071	0.00842917	1	1	1	C3	TTC17
BRD1	0.000840483	0.0319061	1	1	1	C3	BRD1
NUDC	0.000843868	0.00636544	1	1	1	C3	NUDC
GLG1	0.000845565	0.00848494	1	0.998	1	C3	GLG1
NDUFAB1	0.000855813	0.000300102	1	1	1	C3	NDUFAB1
AIP	0.000876218	0.0104382	1	0.998	1	C3	AIP
DUS1L	0.000882382	0.0211495	0.998	0.998	1	C3	DUS1L
ACBD3	0.000900217	0.0177151	1	0.999	1	C3	ACBD3
LIG3	0.000937828	0.0222877	0.998	0.995	1	C3	LIG3
NDUFB21	0.000972048	0.0146233	1	0.999	1	C3	NDUFB2
ZFR	0.000987134	0.015153	1	1	1	C3	ZFR
VDAC3	0.0010807	0.00873322	1	0.999	1	C3	VDAC3
DNAJC11	0.00108711	0.0245394	1	0.999	1	C3	DNAJC11
MCM7	0.00114026	0.0438364	1	1	1	C3	MCM7
RORC	0.00114362	0.0275081	0.986	0.984	1	C3	RORC
SLC25A25	0.00115264	0.0225223	1	0.998	1	C3	SLC25A25
LDLRAP1	0.00116287	0.0463241	0.996	0.997	1	C3	LDLRAP1
PPA2	0.00120167	0.0151017	1	1	1	C3	PPA2
SLC16A1	0.00120196	0.0307303	0.998	0.995	1	C3	SLC16A1
PEX14	0.00123682	0.0255242	1	0.998	1	C3	PEX14
MATR3	0.00133245	0.0359267	1	1	1	C3	MATR3
PMVK	0.00133861	0.0148445	0.996	0.992	1	C3	PMVK
SLC9A3R1	0.00134936	0.0159648	0.998	1	1	C3	SLC9A3R1
DAAM1	0.00138848	0.0221251	0.996	1	1	C3	DAAM1
NAPG	0.0013969	0.0198197	1	0.997	1	C3	NAPG
MRPL27	0.00140503	0.0236683	0.996	0.994	1	C3	MRPL27
TCF3	0.00141116	0.0351242	1	0.999	1	C3	TCF3
MEF2C	0.00145823	0.00847264	0.998	1	1	C3	MEF2C
RPS25	0.00146422	0.0137843	1	1	1	C3	RPS25
LRRC8B	0.00148053	0.0217052	1	0.997	1	C3	LRRC8B
SS18	0.00148124	0.0116212	1	0.999	1	C3	SS18
MRPS33	0.00155564	0.0347133	0.994	0.991	1	C3	MRPS33
SRM	0.00156499	0.021292	0.994	0.993	1	C3	SRM
OXR1	0.00158575	0.0156314	0.996	0.999	1	C3	OXR1
PDHX	0.00158726	0.019171	1	0.997	1	C3	PDHX
CAMK2D	0.00158802	0.0338321	1	0.997	1	C3	CAMK2D
RPS13	0.00160176	0.0268758	1	1	1	C3	RPS13
AGGF1	0.0016133	0.0108163	1	1	1	C3	AGGF1
KLRK1	0.00168813	0.0542327	1	1	1	C3	KLRK1
RBM6	0.00173703	0.0194642	1	0.999	1	C3	RBM6
B4GALT3	0.00175611	0.0149729	1	1	1	C3	B4GALT3
BIRC6	0.00182747	0.0186729	1	1	1	C3	BIRC6
MAN1B1	0.00185009	0.0105456	1	0.999	1	C3	MAN1B1
APRT	0.00185622	0.0203763	0.996	0.997	1	C3	APRT
BAG5	0.00185622	0.0111492	1	0.999	1	C3	BAG5
NOSIP	0.00192857	0.011537	0.998	0.999	1	C3	NOSIP
PDCD4	0.00201388	0.0128595	1	0.999	1	C3	PDCD4
MRPL52	0.00203192	0.0107985	1	0.999	1	C3	MRPL52
SNRPB	0.00204148	0.00849469	0.998	1	1	C3	SNRPB
PBX4	0.00210855	0.038964	0.998	0.993	1	C3	PBX4
MTHFD1	0.002168	0.0243617	1	0.999	1	C3	MTHFD1
MYBBP1A	0.00218018	0.0234526	0.998	1	1	C3	MYBBP1A
POLR3K	0.00232531	0.00655934	0.998	1	1	C3	POLR3K
PRPSAP1	0.00233937	0.00819294	1	0.999	1	C3	PRPSAP1
POLR2B	0.00237268	0.0199007	1	1	1	C3	POLR2B
PEX7	0.00239809	0.0158476	0.998	0.995	1	C3	PEX7
EEF1A1	0.00240865	0.0262162	1	1	1	C3	EEF1A1
EIF2B5	0.0024821	0.0147394	1	0.999	1	C3	EIF2B5
LRRC45	0.00256878	0.0213811	0.994	0.99	1	C3	LRRC45
MRPL4	0.00263093	0.0217177	0.998	0.994	1	C3	MRPL4
COX7C	0.00271302	0.0229303	1	1	1	C3	COX7C
GNG2	0.00273735	0.0102252	0.998	1	1	C3	GNG2
DMTF1	0.0028315	0.0176443	0.998	0.999	1	C3	DMTF1
ARHGEF6	0.00284575	0.00545358	0.998	1	1	C3	ARHGEF6
NDUFB7	0.00294597	0.00691193	0.994	0.998	1	C3	NDUFB7
POLR3GL	0.00299456	0.013223	1	1	1	C3	POLR3GL
RPL30	0.00299864	0.0124964	1	1	1	C3	RPL30
LCMT1	0.00305217	0.00499768	1	0.997	1	C3	LCMT1
KLHDC3	0.00320932	0.00791319	0.996	0.999	1	C3	KLHDC3
MRPL12	0.00322382	0.0261779	0.992	0.986	1	C3	MRPL12
STRAP	0.00323111	0.00995655	1	0.999	1	C3	STRAP
TMPO	0.00323257	0.0397879	1	1	1	C3	TMPO
IRF2BP2	0.00324864	0.0225019	1	1	1	C3	IRF2BP2
RPS14	0.00352459	0.0203582	1	1	1	C3	RPS14
ELK4	0.00368476	0.0389597	1	0.999	1	C3	ELK4
DERL1	0.00372935	0.0103179	1	0.999	1	C3	DERL1
CKS1B	0.00375267	0.0233262	0.984	0.954	1	C3	CKS1B
BCL7C	0.00380984	0.0157344	0.998	1	1	C3	BCL7C
PTDSS1	0.00383872	0.0146561	1	0.999	1	C3	PTDSS1
UNG	0.00384298	0.0290056	1	0.995	1	C3	UNG
USP7	0.00402511	0.0184233	1	0.999	1	C3	USP7
EIF2B4	0.00403224	0.00489721	0.998	1	1	C3	EIF2B4
PRKACB	0.00454841	0.0499145	0.998	1	1	C3	PRKACB
DDB2	0.00455438	0.0133118	1	0.998	1	C3	DDB2
RSRC1	0.00471619	0.00994685	0.998	1	1	C3	RSRC1
LEMD3	0.00481366	0.00332167	0.998	0.999	1	C3	LEMD3
FTSJ1	0.00487893	0.0200048	0.996	0.993	1	C3	FTSJ1
DRG1	0.00490229	0.0102033	1	1	1	C3	DRG1
PPP2R5D	0.00493431	0.0151045	1	1	1	C3	PPP2R5D
CD180	0.00505987	0.0213605	0.996	0.995	1	C3	CD180
HDAC1	0.00510384	0.00998145	1	1	1	C3	HDAC1
TIAM1	0.00511599	0.0200081	0.996	0.999	1	C3	TIAM1
RPL32	0.00521302	0.0399985	1	0.998	1	C3	RPL32
GSTP1	0.00529001	0.0112135	0.998	0.998	1	C3	GSTP1
FLAD1	0.00549171	0.0134118	1	0.999	1	C3	FLAD1
RPL37A	0.00551533	0.00755843	1	1	1	C3	RPL37A
BLCAP	0.00554618	0.022783	1	1	1	C3	BLCAP
LIAS	0.00555332	0.0182517	0.998	0.998	1	C3	LIAS
UQCRC2	0.00567599	0.00287158	1	0.999	1	C3	UQCRC2
FBXL12	0.00583339	0.0184354	0.998	0.997	1	C3	FBXL12
MYB	0.00611182	0.0229343	0.996	0.994	1	C3	MYB
MRPL181	0.00613914	0.0060168	1	1	1	C3	MRPL18
YTHDF2	0.0061705	0.0117695	1	0.999	1	C3	YTHDF2
PTGER4	0.00620331	0.00912315	1	1	1	C3	PTGER4
RHOBTB2	0.00623629	0.0217597	1	0.999	1	C3	RHOBTB2
RBM15	0.00627075	0.00629398	1	0.999	1	C3	RBM15
CABIN1	0.00634286	0.0256756	1	0.998	1	C3	CABIN1
ANAPC4	0.00647018	0.00644901	0.998	0.999	1	C3	ANAPC4
HSPE1	0.00656094	0.0165736	0.998	1	1	C3	HSPE1
STX18	0.0070101	0.0136369	1	0.998	1	C3	STX18
THOC2	0.00706167	0.0082089	0.998	1	1	C3	THOC2
DENR	0.00710021	0.00509585	1	1	1	C3	DENR
LSS	0.00712997	0.0414072	1	0.992	1	C3	LSS
ZBTB11	0.00738141	0.0172336	0.998	1	1	C3	ZBTB11
UBE2T	0.00739988	0.0281548	0.864	0.826	1	C3	UBE2T
VPS52	0.0074913	0.0189144	0.988	0.986	1	C3	VPS52
CHPF	0.00757434	0.00906724	0.988	0.988	1	C3	CHPF
PANK3	0.00776865	0.0304678	0.998	1	1	C3	PANK3
ATR	0.00787886	0.0231117	0.998	1	1	C3	ATR
PACS2	0.00789518	0.0286571	0.996	0.997	1	C3	PACS2
TM7SF2	0.00791808	0.0225077	0.996	0.989	1	C3	TM7SF2
COMMD4	0.00791809	0.00894885	0.998	0.998	1	C3	COMMD4
COMMD10	0.00838196	0.029354	1	0.999	1	C3	COMMD10
PPIG	0.00848771	0.0177374	1	1	1	C3	PPIG
ROBO31	0.00858936	0.0346089	0.992	0.991	1	C3	ROBO3
FXYD5	0.00870457	0.016054	1	1	1	C3	FXYD5
SACM1L	0.0089355	0.0161673	1	1	1	C3	SACM1L
BARD1	0.00903455	0.0458254	1	0.999	1	C3	BARD1
PRPF4B	0.00917561	0.0270038	0.998	0.999	1	C3	PRPF4B
NUBP2	0.00925064	0.0255703	1	0.994	1	C3	NUBP2
ATP2C1	0.00937183	0.0150067	0.998	1	1	C3	ATP2C1
ANKMY1	0.00939471	0.0201735	0.998	1	1	C3	ANKMY1
NOXA1	0.00945592	0.0104659	0.984	0.989	1	C3	NOXA1
NSMCE1	0.0097993	0.00861728	1	0.999	1	C3	NSMCE1
RNASEH1	0.00981119	0.0183231	1	0.998	1	C3	RNASEH1
CMAS	0.00988285	0.00694818	1	0.999	1	C3	CMAS
SUZ12	0.00989484	0.00663606	1	1	1	C3	SUZ12
