# Supplementary material
Source: publisher site journal article supplement (doi:10.18632/aging.206048)
Supplement: Supplementary file 6 [file aging-v16-206048-supplementary-material-SD7.xlsx]

## Sheet: C1
ID	Description	GeneRatio	BgRatio	pvalue	p.adjust	qvalue	geneID	Count
GO:0019221	cytokine-mediated signaling pathway	25/192	472/18723	1.81628e-11	5.82845e-08	4.64586e-08	IL18R1/AIM2/ACSL1/ARG1/EXT1/IL1B/TNFRSF1A/TNFSF13B/IFNAR1/IL1RAP/IL1RN/HCK/CSF3R/CCR1/ADAM17/STAT3/LILRA5/PADI2/MYD88/IL13RA1/CXCL1/SPPL2A/IL10RB/STAT5B/HIF1A	25
GO:0072593	reactive oxygen species metabolic process	16/192	239/18723	3.51847e-09	5.64538e-06	4.49993e-06	PDK3/TLR4/TLR6/NCF4/ITGAM/BST1/SOD2/MAPK14/STAT3/ALOX12/NCF2/CYB5R4/HDAC4/HIF1A/GRB2/HK2	16
GO:0051092	positive regulation of NF-kappaB transcription factor activity	13/192	152/18723	5.82348e-09	6.22918e-06	4.96528e-06	IL18R1/AIM2/TLR4/TLR6/IL1B/FLOT1/IL1RAP/TLR2/TRIM21/STAT3/MYD88/SLCO3A1/FLOT2	13
GO:0001819	positive regulation of cytokine production	20/192	467/18723	7.59043e-08	5.12314e-05	4.08366e-05	IL18R1/AIM2/TLR8/TLR4/TLR6/IL1B/BCL3/FLOT1/IL1RAP/CD58/TLR2/MAPK14/ADAM17/STAT3/LILRA5/MYD88/PANX2/STAT5B/HIF1A/SORL1	20
GO:2000377	regulation of reactive oxygen species metabolic process	12/192	157/18723	7.98246e-08	5.12314e-05	4.08366e-05	PDK3/TLR4/TLR6/ITGAM/BST1/SOD2/MAPK14/STAT3/HDAC4/HIF1A/GRB2/HK2	12
GO:0032755	positive regulation of interleukin-6 production	9/192	93/18723	4.76135e-07	0.000232481	0.00018531	TLR8/TLR4/TLR6/IL1B/IL1RAP/TLR2/STAT3/LILRA5/MYD88	9
GO:0051091	positive regulation of DNA-binding transcription factor activity	14/192	260/18723	5.07125e-07	0.000232481	0.00018531	IL18R1/AIM2/TLR4/TLR6/IL1B/FLOT1/IL1RAP/TLR2/TRIM21/STAT3/MYD88/HDAC4/SLCO3A1/FLOT2	14
GO:0032732	positive regulation of interleukin-1 production	8/192	73/18723	8.03688e-07	0.000290683	0.000231703	AIM2/TLR8/TLR4/TLR6/STAT3/LILRA5/MYD88/PANX2	8
GO:0002366	leukocyte activation involved in immune response	14/192	275/18723	9.92133e-07	0.000290683	0.000231703	IL18R1/CR1/TLR4/DYSF/ITGAM/LOXL3/BCL3/NFKBIZ/SEMA4A/LAT2/FES/STAT3/MYD88/APBB1IP	14
GO:0032677	regulation of interleukin-8 production	9/192	102/18723	1.04746e-06	0.000290683	0.000231703	TLR8/TLR4/TLR6/IL1B/BCL3/CD58/TLR2/STAT3/MYD88	9
GO:0044546	NLRP3 inflammasome complex assembly	5/192	19/18723	1.11379e-06	0.000290683	0.000231703	AIM2/TLR4/TLR6/MYD88/MEFV	5
GO:0032637	interleukin-8 production	9/192	103/18723	1.13769e-06	0.000290683	0.000231703	TLR8/TLR4/TLR6/IL1B/BCL3/CD58/TLR2/STAT3/MYD88	9
GO:0002263	cell activation involved in immune response	14/192	279/18723	1.17759e-06	0.000290683	0.000231703	IL18R1/CR1/TLR4/DYSF/ITGAM/LOXL3/BCL3/NFKBIZ/SEMA4A/LAT2/FES/STAT3/MYD88/APBB1IP	14
GO:0140632	inflammasome complex assembly	5/192	20/18723	1.47272e-06	0.000337568	0.000269076	AIM2/TLR4/TLR6/MYD88/MEFV	5
GO:0042060	wound healing	17/192	422/18723	1.74785e-06	0.000373923	0.000298054	F5/ST3GAL4/TLR4/DYSF/EXT1/PLAUR/RAF1/PLSCR1/SERPINA1/MAPK14/ADAM17/ENTPD1/MYL9/ALOX12/GNAQ/HIF1A/TREML1	17
GO:0050878	regulation of body fluid levels	16/192	379/18723	1.95307e-06	0.000391712	0.000312234	F5/ST3GAL4/TLR4/EXT1/PLAUR/PLSCR1/SERPINA1/MAPK14/ENTPD1/MYL9/ALOX12/GNAQ/STAT5B/HIF1A/HK2/TREML1	16
GO:0007596	blood coagulation	12/192	217/18723	2.56782e-06	0.000484714	0.000386366	F5/ST3GAL4/TLR4/PLAUR/PLSCR1/SERPINA1/MAPK14/ENTPD1/MYL9/ALOX12/GNAQ/TREML1	12
GO:0007599	hemostasis	12/192	222/18723	3.25121e-06	0.000498773	0.000397572	F5/ST3GAL4/TLR4/PLAUR/PLSCR1/SERPINA1/MAPK14/ENTPD1/MYL9/ALOX12/GNAQ/TREML1	12
GO:0050817	coagulation	12/192	222/18723	3.25121e-06	0.000498773	0.000397572	F5/ST3GAL4/TLR4/PLAUR/PLSCR1/SERPINA1/MAPK14/ENTPD1/MYL9/ALOX12/GNAQ/TREML1	12
GO:0032731	positive regulation of interleukin-1 beta production	7/192	62/18723	3.26402e-06	0.000498773	0.000397572	AIM2/TLR8/TLR4/TLR6/STAT3/LILRA5/MYD88	7
GO:0032757	positive regulation of interleukin-8 production	7/192	62/18723	3.26402e-06	0.000498773	0.000397572	TLR8/TLR4/IL1B/CD58/TLR2/STAT3/MYD88	7
GO:0006909	phagocytosis	14/192	308/18723	3.74614e-06	0.000544844	0.000434295	RAB20/TLR4/DYSF/NCF4/ITGAM/IL1B/PLSCR1/HCK/TLR2/SIRPB1/ABCA1/NCF2/MYD88/RAB31	14
GO:0002755	MyD88-dependent toll-like receptor signaling pathway	5/192	24/18723	3.90508e-06	0.000544844	0.000434295	TLR8/TLR4/TLR6/TLR2/MYD88	5
GO:0002460	adaptive immune response based on somatic recombination of immune receptors built from immunoglobulin superfamily domains	15/192	356/18723	4.22887e-06	0.000565435	0.000450708	IL18R1/CR1/TLR8/TLR4/ARG1/C1RL/IL1B/TNFSF13B/LOXL3/BCL3/NFKBIZ/SEMA4A/ADAM17/STAT3/MYD88	15
GO:0002237	response to molecule of bacterial origin	15/192	363/18723	5.35128e-06	0.00068689	0.00054752	TLR4/ARG1/TLR6/IL1B/IFNAR1/FOS/SOD2/HCK/TLR2/MAPK14/ADAM17/ABCA1/MYD88/CXCL1/LITAF	15
GO:1900017	positive regulation of cytokine production involved in inflammatory response	5/192	26/18723	5.94376e-06	0.000733597	0.00058475	TLR4/TLR6/STAT3/MYD88/HIF1A	5
GO:0050900	leukocyte migration	15/192	369/18723	6.51743e-06	0.0007675	0.000611774	ST3GAL4/MMP9/EXT1/BST1/HCK/SELL/CSF3R/CCR1/ADAM17/PADI2/MYD88/CXCL1/DUSP1/STAT5B/CXCL16	15
GO:0032612	interleukin-1 production	9/192	128/18723	6.93596e-06	0.0007675	0.000611774	AIM2/TLR8/TLR4/TLR6/STAT3/LILRA5/MYD88/PANX2/MEFV	9
GO:0032652	regulation of interleukin-1 production	9/192	128/18723	6.93596e-06	0.0007675	0.000611774	AIM2/TLR8/TLR4/TLR6/STAT3/LILRA5/MYD88/PANX2/MEFV	9
GO:0002534	cytokine production involved in inflammatory response	7/192	72/18723	8.96806e-06	0.000928339	0.000739979	TLR4/TLR6/MAPK14/STAT3/MYD88/HIF1A/MEFV	7
GO:1900015	regulation of cytokine production involved in inflammatory response	7/192	72/18723	8.96806e-06	0.000928339	0.000739979	TLR4/TLR6/MAPK14/STAT3/MYD88/HIF1A/MEFV	7
GO:0006801	superoxide metabolic process	7/192	74/18723	1.07681e-05	0.00107984	0.000860738	NCF4/ITGAM/BST1/SOD2/ALOX12/NCF2/CYB5R4	7
GO:0050727	regulation of inflammatory response	15/192	386/18723	1.11464e-05	0.0010839	0.000863976	TLR4/MMP9/TNFAIP6/IL1B/TNFRSF1A/BST1/NFKBIZ/SOCS3/HCK/TLR2/MAPK14/LILRA5/MYD88/STAT5B/MEFV	15
GO:0032496	response to lipopolysaccharide	14/192	343/18723	1.27588e-05	0.00114983	0.000916529	TLR4/ARG1/IL1B/IFNAR1/FOS/SOD2/HCK/TLR2/MAPK14/ADAM17/ABCA1/MYD88/CXCL1/LITAF	14
GO:2000379	positive regulation of reactive oxygen species metabolic process	7/192	76/18723	1.28576e-05	0.00114983	0.000916529	TLR4/TLR6/ITGAM/SOD2/MAPK14/HDAC4/GRB2	7
GO:0051090	regulation of DNA-binding transcription factor activity	16/192	440/18723	1.28993e-05	0.00114983	0.000916529	IL18R1/AIM2/TLR4/TLR6/IL1B/BCL3/FLOT1/IL1RAP/HCK/TLR2/TRIM21/STAT3/MYD88/HDAC4/SLCO3A1/FLOT2	16
GO:0034341	response to interferon-gamma	9/192	141/18723	1.5183e-05	0.00131682	0.00104963	RAB20/TLR4/ARG1/CD58/HCK/TLR2/TRIM21/MEFV/CXCL16	9
GO:0032611	interleukin-1 beta production	8/192	110/18723	1.77365e-05	0.00145939	0.00116328	AIM2/TLR8/TLR4/TLR6/STAT3/LILRA5/MYD88/MEFV	8
GO:0032651	regulation of interleukin-1 beta production	8/192	110/18723	1.77365e-05	0.00145939	0.00116328	AIM2/TLR8/TLR4/TLR6/STAT3/LILRA5/MYD88/MEFV	8
GO:0071219	cellular response to molecule of bacterial origin	11/192	221/18723	1.82577e-05	0.00146472	0.00116753	TLR4/ARG1/TLR6/IL1B/HCK/TLR2/MAPK14/ABCA1/MYD88/CXCL1/LITAF	11
GO:1900225	regulation of NLRP3 inflammasome complex assembly	4/192	18/18723	2.93059e-05	0.00229372	0.00182833	TLR4/TLR6/MYD88/MEFV	4
GO:0031349	positive regulation of defense response	12/192	278/18723	3.12562e-05	0.00233926	0.00186463	AIM2/TLR8/TLR4/ARG1/IL1B/TNFRSF1A/PLSCR1/NFKBIZ/HCK/TLR2/LILRA5/STAT5B	12
GO:0071402	cellular response to lipoprotein particle stimulus	5/192	36/18723	3.13457e-05	0.00233926	0.00186463	TLR4/TLR6/ADAM17/ABCA1/MYD88	5
GO:0031663	lipopolysaccharide-mediated signaling pathway	6/192	60/18723	3.39853e-05	0.00247861	0.0019757	TLR4/IL1B/HCK/TLR2/MAPK14/MYD88	6
GO:0032615	interleukin-12 production	6/192	62/18723	4.10288e-05	0.00286221	0.00228146	TLR8/TLR4/TLR2/MAPK14/LILRA5/MEFV	6
GO:0032655	regulation of interleukin-12 production	6/192	62/18723	4.10288e-05	0.00286221	0.00228146	TLR8/TLR4/TLR2/MAPK14/LILRA5/MEFV	6
GO:0006898	receptor-mediated endocytosis	11/192	244/18723	4.53349e-05	0.00309531	0.00246728	ITGAM/SDCBP/FLOT1/FCHO2/PICALM/NUMB/GRB2/SORL1/RAB31/ARHGAP27/CXCL16	11
GO:0071216	cellular response to biotic stimulus	11/192	246/18723	4.88156e-05	0.00326353	0.00260136	TLR4/ARG1/TLR6/IL1B/HCK/TLR2/MAPK14/ABCA1/MYD88/CXCL1/LITAF	11
GO:0032635	interleukin-6 production	9/192	165/18723	5.26073e-05	0.00337634	0.00269128	TLR8/TLR4/TLR6/IL1B/IL1RAP/TLR2/STAT3/LILRA5/MYD88	9
GO:0032675	regulation of interleukin-6 production	9/192	165/18723	5.26073e-05	0.00337634	0.00269128	TLR8/TLR4/TLR6/IL1B/IL1RAP/TLR2/STAT3/LILRA5/MYD88	9
GO:0002532	production of molecular mediator involved in inflammatory response	7/192	95/18723	5.51728e-05	0.0034048	0.00271397	TLR4/TLR6/MAPK14/STAT3/MYD88/HIF1A/MEFV	7
GO:0050764	regulation of phagocytosis	7/192	95/18723	5.51728e-05	0.0034048	0.00271397	DYSF/IL1B/PLSCR1/HCK/TLR2/SIRPB1/RAB31	7
GO:0042093	T-helper cell differentiation	6/192	66/18723	5.86168e-05	0.00354908	0.00282897	IL18R1/LOXL3/BCL3/NFKBIZ/SEMA4A/STAT3	6
GO:0032733	positive regulation of interleukin-10 production	5/192	41/18723	5.97758e-05	0.00354939	0.00282922	TLR4/BCL3/TLR2/STAT3/LILRA5	5
GO:0071222	cellular response to lipopolysaccharide	10/192	209/18723	6.14499e-05	0.00354939	0.00282922	TLR4/ARG1/IL1B/HCK/TLR2/MAPK14/ABCA1/MYD88/CXCL1/LITAF	10
GO:0022407	regulation of cell-cell adhesion	15/192	448/18723	6.21982e-05	0.00354939	0.00282922	CR1/ST3GAL4/ARG1/IL1B/TNFSF13B/LOXL3/PLAUR/FLOT1/NFKBIZ/IL1RN/MAPK14/SIRPB1/ALOX12/STAT5B/FLOT2	15
GO:1901216	positive regulation of neuron death	7/192	97/18723	6.30462e-05	0.00354939	0.00282922	TLR4/TLR6/ITGAM/FOS/PICALM/HDAC4/MCL1	7
GO:0032642	regulation of chemokine production	7/192	98/18723	6.73141e-05	0.0037131	0.00295971	TLR4/IL1B/TLR2/ADAM17/MYD88/HIF1A/MEFV	7
GO:0002294	CD4-positive, alpha-beta T cell differentiation involved in immune response	6/192	68/18723	6.94253e-05	0.0037131	0.00295971	IL18R1/LOXL3/BCL3/NFKBIZ/SEMA4A/STAT3	6
GO:0042987	amyloid precursor protein catabolic process	6/192	68/18723	6.94253e-05	0.0037131	0.00295971	ADAM17/PICALM/RTN2/APH1B/SORL1/FLOT2	6
GO:0032602	chemokine production	7/192	99/18723	7.18152e-05	0.00377795	0.0030114	TLR4/IL1B/TLR2/ADAM17/MYD88/HIF1A/MEFV	7
GO:0002287	alpha-beta T cell activation involved in immune response	6/192	69/18723	7.53953e-05	0.00378652	0.00301823	IL18R1/LOXL3/BCL3/NFKBIZ/SEMA4A/STAT3	6
GO:0002293	alpha-beta T cell differentiation involved in immune response	6/192	69/18723	7.53953e-05	0.00378652	0.00301823	IL18R1/LOXL3/BCL3/NFKBIZ/SEMA4A/STAT3	6
GO:0042088	T-helper 1 type immune response	5/192	43/18723	7.55179e-05	0.00378652	0.00301823	IL18R1/TLR4/IL1B/BCL3/SEMA4A	5
GO:0045088	regulation of innate immune response	10/192	218/18723	8.73284e-05	0.00430597	0.00343229	AIM2/CR1/TLR8/TLR4/ARG1/PLSCR1/HCK/TRIM21/TRAFD1/STAT5B	10
GO:0032722	positive regulation of chemokine production	6/192	71/18723	8.85615e-05	0.00430597	0.00343229	TLR4/IL1B/TLR2/ADAM17/MYD88/HIF1A	6
GO:0045639	positive regulation of myeloid cell differentiation	7/192	103/18723	9.23474e-05	0.00442303	0.0035256	FOS/CCR1/MAPK14/FES/STAT3/STAT5B/HIF1A	7
GO:1903428	positive regulation of reactive oxygen species biosynthetic process	4/192	24/18723	9.69809e-05	0.00457664	0.00364804	TLR4/TLR6/SOD2/HDAC4	4
GO:0002274	myeloid leukocyte activation	10/192	223/18723	0.000105336	0.00489891	0.00390492	CLEC4D/TLR4/DYSF/TLR6/ITGAM/PLSCR1/LAT2/TLR2/FES/MYD88	10
GO:0032102	negative regulation of response to external stimulus	14/192	420/18723	0.000114966	0.00519612	0.00414183	CR1/TNFAIP6/ARG1/TNFRSF1A/SOCS3/HCK/SEMA4A/MAPK14/TRIM21/ALOX12/PADI2/TRAFD1/DUSP1/MEFV	14
GO:0050867	positive regulation of cell activation	14/192	420/18723	0.000114966	0.00519612	0.00414183	CLEC4D/CR1/TLR4/TLR6/ITGAM/IL1B/TNFSF13B/BST1/NFKBIZ/SIRPB1/LILRA5/MYD88/STAT5B/FLOT2	14
GO:0002292	T cell differentiation involved in immune response	6/192	75/18723	0.000120365	0.00523933	0.00417627	IL18R1/LOXL3/BCL3/NFKBIZ/SEMA4A/STAT3	6
GO:0070391	response to lipoteichoic acid	3/192	10/18723	0.00012082	0.00523933	0.00417627	TLR4/TLR2/MAPK14	3
GO:0071223	cellular response to lipoteichoic acid	3/192	10/18723	0.00012082	0.00523933	0.00417627	TLR4/TLR2/MAPK14	3
GO:1903131	mononuclear cell differentiation	14/192	426/18723	0.000133333	0.00565482	0.00450746	IL18R1/CR1/NFIL3/IL1B/TNFSF13B/LOXL3/BCL3/NFKBIZ/SEMA4A/ADAM17/FES/STAT3/HDAC4/STAT5B	14
GO:0030098	lymphocyte differentiation	13/192	374/18723	0.000133925	0.00565482	0.00450746	IL18R1/CR1/NFIL3/IL1B/TNFSF13B/LOXL3/BCL3/NFKBIZ/SEMA4A/ADAM17/STAT3/HDAC4/STAT5B	13
GO:0032103	positive regulation of response to external stimulus	14/192	427/18723	0.00013663	0.0056941	0.00453877	AIM2/TLR8/TLR4/ARG1/IL1B/TNFRSF1A/PLSCR1/NFKBIZ/HCK/CCR1/TLR2/ADAM17/LILRA5/STAT5B	14
GO:0043254	regulation of protein-containing complex assembly	14/192	428/18723	0.000139997	0.00575961	0.00459099	TLR4/TLR6/RAF1/SH3GLB1/HCK/RALB/FES/ABCA1/SVIL/MYD88/STXBP5/MEFV/GRB2/SORL1	14
GO:1903203	regulation of oxidative stress-induced neuron death	4/192	27/18723	0.000156369	0.00621594	0.00495473	TLR4/TLR6/MCL1/HIF1A	4
GO:0042110	T cell activation	15/192	487/18723	0.000156556	0.00621594	0.00495473	IL18R1/CR1/ARG1/IL1B/TNFSF13B/LOXL3/BCL3/NFKBIZ/SEMA4A/ADAM17/SIRPB1/STAT3/APBB1IP/STAT5B/FLOT2	15
GO:0007249	I-kappaB kinase/NF-kappaB signaling	11/192	281/18723	0.000159209	0.00621594	0.00495473	TLR8/TLR4/TLR6/IL1B/TNFRSF1A/PELI2/BCL3/TLR2/TRIM21/MYD88/LITAF	11
GO:0006023	aminoglycan biosynthetic process	6/192	79/18723	0.000160622	0.00621594	0.00495473	ST3GAL4/CHSY1/EXT1/IL1B/ST3GAL6/B4GALT5	6
GO:0030099	myeloid cell differentiation	13/192	381/18723	0.000160774	0.00621594	0.00495473	TLR4/MMP9/FOS/JUNB/CSF3R/CCR1/TLR2/MAPK14/FES/STAT3/STAT5B/HIF1A/SNX10	13
GO:1900227	positive regulation of NLRP3 inflammasome complex assembly	3/192	11/18723	0.000164873	0.00629856	0.00502058	TLR4/TLR6/MYD88	3
GO:0044262	cellular carbohydrate metabolic process	11/192	283/18723	0.00016935	0.00639346	0.00509623	GK/PDK3/PYGL/EXT1/PGD/B4GALT5/DGAT2/STAT3/HDAC4/IMPA2/HK2	11
GO:0002286	T cell activation involved in immune response	7/192	114/18723	0.000174477	0.0064934	0.00517589	IL18R1/LOXL3/BCL3/NFKBIZ/SEMA4A/STAT3/APBB1IP	7
GO:0008643	carbohydrate transport	8/192	152/18723	0.000176044	0.0064934	0.00517589	IL1B/SLC37A3/AQP9/MAPK14/RTN2/SORT1/SLC2A3/HK2	8
GO:0002285	lymphocyte activation involved in immune response	9/192	194/18723	0.00018123	0.00660872	0.00526781	IL18R1/CR1/TLR4/LOXL3/BCL3/NFKBIZ/SEMA4A/STAT3/APBB1IP	9
GO:0071260	cellular response to mechanical stimulus	6/192	81/18723	0.000184389	0.00664502	0.00529675	TLR8/TLR4/IL1B/TNFRSF1A/MYD88/HDAC4	6
GO:0002443	leukocyte mediated immunity	14/192	440/18723	0.000186367	0.00664502	0.00529675	IL18R1/CR1/TLR8/TLR4/ARG1/C1RL/ITGAM/IL1B/BCL3/LAT2/ADAM17/FES/MYD88/STAT5B	14
GO:1903426	regulation of reactive oxygen species biosynthetic process	5/192	52/18723	0.000189238	0.00667324	0.00531924	TLR4/TLR6/SOD2/STAT3/HDAC4	5
GO:0016052	carbohydrate catabolic process	8/192	154/18723	0.000192563	0.00671668	0.00535387	GK/PYGL/PGD/CTBS/STAT3/HDAC4/HIF1A/HK2	8
GO:0043367	CD4-positive, alpha-beta T cell differentiation	6/192	83/18723	0.00021085	0.00727547	0.00579928	IL18R1/LOXL3/BCL3/NFKBIZ/SEMA4A/STAT3	6
GO:0032490	detection of molecule of bacterial origin	3/192	12/18723	0.000218173	0.00736965	0.00587435	TLR4/TLR6/TLR2	3
GO:0140052	cellular response to oxidised low-density lipoprotein particle stimulus	3/192	12/18723	0.000218173	0.00736965	0.00587435	TLR4/TLR6/MYD88	3
GO:0036475	neuron death in response to oxidative stress	4/192	31/18723	0.000271512	0.00892991	0.00711803	TLR4/TLR6/MCL1/HIF1A	4
GO:0060759	regulation of response to cytokine stimulus	8/192	162/18723	0.0002719	0.00892991	0.00711803	TLR4/ARG1/IL1RN/TLR2/ADAM17/PADI2/SPPL2A/HIF1A	8
GO:0019915	lipid storage	6/192	87/18723	0.000272711	0.00892991	0.00711803	IL1B/ABHD5/DGAT2/CDS2/ABCA1/STAT5B	6
GO:0016050	vesicle organization	11/192	300/18723	0.000279974	0.00907511	0.00723377	RAB20/DYSF/SDCBP/RAB32/RFX2/PICALM/STX11/SORT1/ABCA1/CSNK1D/SNX10	11
GO:0045017	glycerolipid biosynthetic process	10/192	252/18723	0.000283824	0.0091079	0.00725991	GK/ACSL1/ABHD5/PLSCR1/SOCS3/DGAT2/CDS2/MTMR3/IMPA2/PISD	10
GO:0034612	response to tumor necrosis factor	10/192	253/18723	0.000292916	0.00930662	0.00741831	AIM2/EXT1/TNFRSF1A/TNFSF13B/CD58/MAPK14/ADAM17/HDAC4/SPPL2A/CXCL16	10
GO:0002573	myeloid leukocyte differentiation	9/192	208/18723	0.000304086	0.0095668	0.0076257	TLR4/MMP9/FOS/JUNB/CCR1/TLR2/MAPK14/FES/SNX10	9
GO:0032481	positive regulation of type I interferon production	5/192	58/18723	0.000317477	0.00979796	0.00780995	TLR8/TLR4/FLOT1/TLR2/MYD88	5
GO:0002696	positive regulation of leukocyte activation	13/192	409/18723	0.000319658	0.00979796	0.00780995	CLEC4D/CR1/TLR4/TLR6/ITGAM/IL1B/TNFSF13B/BST1/NFKBIZ/SIRPB1/MYD88/STAT5B/FLOT2	13
GO:0043112	receptor metabolic process	8/192	166/18723	0.000320594	0.00979796	0.00780995	SDCBP/FLOT1/SH3GLB1/PICALM/NUMB/GRB2/SORL1/RAB31	8
GO:0045637	regulation of myeloid cell differentiation	9/192	210/18723	0.000326246	0.00987664	0.00787267	TLR4/FOS/CSF3R/CCR1/MAPK14/FES/STAT3/STAT5B/HIF1A	9
GO:0030217	T cell differentiation	10/192	257/18723	0.000331763	0.00994979	0.00793098	IL18R1/CR1/IL1B/LOXL3/BCL3/NFKBIZ/SEMA4A/ADAM17/STAT3/STAT5B	10
GO:0031348	negative regulation of defense response	10/192	258/18723	0.00034212	0.0101374	0.00808052	CR1/TNFAIP6/ARG1/TNFRSF1A/SOCS3/HCK/MAPK14/TRIM21/TRAFD1/MEFV	10
GO:0045648	positive regulation of erythrocyte differentiation	4/192	33/18723	0.000347495	0.0101374	0.00808052	MAPK14/STAT3/STAT5B/HIF1A	4
GO:1902992	negative regulation of amyloid precursor protein catabolic process	4/192	33/18723	0.000347495	0.0101374	0.00808052	PICALM/RTN2/SORL1/FLOT2	4
GO:0002467	germinal center formation	3/192	14/18723	0.000355555	0.0102791	0.00819345	TNFSF13B/BCL3/ADAM17	3
GO:0006022	aminoglycan metabolic process	7/192	129/18723	0.000372629	0.0106765	0.00851023	ST3GAL4/CHSY1/EXT1/IL1B/CTBS/ST3GAL6/B4GALT5	7
GO:0007259	receptor signaling pathway via JAK-STAT	8/192	170/18723	0.000376184	0.010683	0.00851538	TNFRSF1A/IFNAR1/BCL3/SOCS3/STAT3/PIAS1/IL10RB/STAT5B	8
GO:0002446	neutrophil mediated immunity	4/192	34/18723	0.000390692	0.010902	0.00868998	ARG1/ITGAM/ADAM17/MYD88	4
GO:0055094	response to lipoprotein particle	4/192	34/18723	0.000390692	0.010902	0.00868998	TLR4/TLR6/ABCA1/MYD88	4
GO:0009612	response to mechanical stimulus	9/192	216/18723	0.000400879	0.0110285	0.00879079	TLR8/TLR4/IL1B/TNFRSF1A/RAF1/FOS/MAPK14/MYD88/HDAC4	9
GO:0034113	heterotypic cell-cell adhesion	5/192	61/18723	0.000402097	0.0110285	0.00879079	DSC2/IL1B/FLOT1/CD58/IL1RN	5
GO:0030316	osteoclast differentiation	6/192	94/18723	0.000414461	0.0111455	0.00888407	TLR4/FOS/JUNB/CCR1/MAPK14/SNX10	6
GO:0009615	response to virus	12/192	367/18723	0.000421719	0.0111455	0.00888407	AIM2/TLR8/EXT1/IFNAR1/BCL3/PLSCR1/IVNS1ABP/TLR2/MAPK14/MYD88/IL10RB/HIF1A	12
GO:1903706	regulation of hemopoiesis	12/192	367/18723	0.000421719	0.0111455	0.00888407	CR1/TLR4/LOXL3/NFKBIZ/FOS/CSF3R/CCR1/MAPK14/FES/STAT3/STAT5B/HIF1A	12
GO:0032613	interleukin-10 production	5/192	62/18723	0.00043377	0.0111455	0.00888407	TLR4/BCL3/TLR2/STAT3/LILRA5	5
GO:0032653	regulation of interleukin-10 production	5/192	62/18723	0.00043377	0.0111455	0.00888407	TLR4/BCL3/TLR2/STAT3/LILRA5	5
GO:0032479	regulation of type I interferon production	6/192	95/18723	0.000438683	0.0111455	0.00888407	TLR8/TLR4/FLOT1/TLR2/TRIM21/MYD88	6
GO:0032606	type I interferon production	6/192	95/18723	0.000438683	0.0111455	0.00888407	TLR8/TLR4/FLOT1/TLR2/TRIM21/MYD88	6
GO:0042982	amyloid precursor protein metabolic process	6/192	95/18723	0.000438683	0.0111455	0.00888407	ADAM17/PICALM/RTN2/APH1B/SORL1/FLOT2	6
GO:1990823	response to leukemia inhibitory factor	6/192	95/18723	0.000438683	0.0111455	0.00888407	EXT1/SOCS3/PADI2/TLE4/SNX10/HK2	6
GO:1901741	positive regulation of myoblast fusion	3/192	15/18723	0.000441096	0.0111455	0.00888407	FLOT1/MAPK14/CD53	3
GO:0007159	leukocyte cell-cell adhesion	12/192	371/18723	0.0004645	0.0116452	0.00928236	CR1/ST3GAL4/ARG1/EXT1/IL1B/TNFSF13B/LOXL3/NFKBIZ/SELL/SIRPB1/STAT5B/FLOT2	12
GO:1901214	regulation of neuron death	11/192	319/18723	0.000470397	0.0117016	0.00932733	TLR4/TLR6/ITGAM/FOS/SOD2/PICALM/STAT3/HDAC4/MCL1/HIF1A/SORL1	11
GO:0071496	cellular response to external stimulus	11/192	320/18723	0.000482861	0.0119192	0.00950083	TLR8/TLR4/IL1B/TNFRSF1A/FOS/SH3GLB1/MTMR3/RALB/FES/MYD88/HDAC4	11
GO:0045742	positive regulation of epidermal growth factor receptor signaling pathway	4/192	36/18723	0.000488372	0.0119633	0.00953592	MMP9/PLAUR/ADAM17/SHKBP1	4
GO:1903409	reactive oxygen species biosynthetic process	5/192	64/18723	0.000502719	0.0122214	0.00974168	TLR4/TLR6/SOD2/STAT3/HDAC4	5
GO:2001243	negative regulation of intrinsic apoptotic signaling pathway	6/192	98/18723	0.000518025	0.0124988	0.00996281	MMP9/PLAUR/IVNS1ABP/SOD2/MCL1/HIF1A	6
GO:1904683	regulation of metalloendopeptidase activity	3/192	16/18723	0.0005388	0.0128857	0.0102712	PICALM/STAT3/SORL1	3
GO:0002444	myeloid leukocyte mediated immunity	6/192	99/18723	0.000546813	0.0128857	0.0102712	ARG1/ITGAM/LAT2/ADAM17/FES/MYD88	6
GO:0033209	tumor necrosis factor-mediated signaling pathway	6/192	99/18723	0.000546813	0.0128857	0.0102712	AIM2/EXT1/TNFRSF1A/TNFSF13B/ADAM17/SPPL2A	6
GO:0007033	vacuole organization	8/192	180/18723	0.000550123	0.0128857	0.0102712	RAB20/EXT1/TBC1D14/SH3GLB1/RAB33B/MTMR3/RALB/ABCA1	8
GO:0097696	receptor signaling pathway via STAT	8/192	181/18723	0.0005706	0.0132685	0.0105763	TNFRSF1A/IFNAR1/BCL3/SOCS3/STAT3/PIAS1/IL10RB/STAT5B	8
GO:1901186	positive regulation of ERBB signaling pathway	4/192	38/18723	0.00060229	0.0139047	0.0110834	MMP9/PLAUR/ADAM17/SHKBP1	4
GO:0071356	cellular response to tumor necrosis factor	9/192	229/18723	0.000611467	0.0140157	0.0111719	AIM2/EXT1/TNFRSF1A/TNFSF13B/CD58/MAPK14/ADAM17/HDAC4/SPPL2A	9
GO:0035710	CD4-positive, alpha-beta T cell activation	6/192	102/18723	0.000640691	0.0145814	0.0116228	IL18R1/LOXL3/BCL3/NFKBIZ/SEMA4A/STAT3	6
GO:0050729	positive regulation of inflammatory response	7/192	142/18723	0.000662962	0.0148369	0.0118265	TLR4/IL1B/TNFRSF1A/NFKBIZ/TLR2/LILRA5/STAT5B	7
GO:0032728	positive regulation of interferon-beta production	4/192	39/18723	0.000665787	0.0148369	0.0118265	TLR8/TLR4/FLOT1/TLR2	4
GO:2000785	regulation of autophagosome assembly	4/192	39/18723	0.000665787	0.0148369	0.0118265	TBC1D14/SH3GLB1/MTMR3/RALB	4
GO:0038061	NIK/NF-kappaB signaling	7/192	143/18723	0.000691144	0.0152957	0.0121922	IL18R1/TLR4/TLR6/IL1B/BCL3/TLR2/LITAF	7
GO:0022409	positive regulation of cell-cell adhesion	10/192	284/18723	0.000722899	0.0158889	0.0126651	CR1/ST3GAL4/IL1B/TNFSF13B/PLAUR/FLOT1/NFKBIZ/SIRPB1/STAT5B/FLOT2	10
GO:0045429	positive regulation of nitric oxide biosynthetic process	4/192	40/18723	0.000733883	0.0159451	0.0127098	TLR4/TLR6/IL1B/DDAH2	4
GO:0002699	positive regulation of immune effector process	9/192	235/18723	0.000735391	0.0159451	0.0127098	IL18R1/CR1/TLR4/ARG1/ITGAM/IL1B/NFKBIZ/FES/STAT5B	9
GO:0046486	glycerolipid metabolic process	12/192	392/18723	0.000754031	0.0162395	0.0129445	GK/ACSL1/ABHD5/PLSCR1/SOCS3/DGAT2/CDS2/MTMR3/ABHD2/IMPA2/PISD/SORL1	12
GO:0035743	CD4-positive, alpha-beta T cell cytokine production	3/192	18/18723	0.000773338	0.0164347	0.0131001	IL18R1/ARG1/IL1B	3
GO:1903209	positive regulation of oxidative stress-induced cell death	3/192	18/18723	0.000773338	0.0164347	0.0131001	TLR4/TLR6/MCL1	3
GO:1904407	positive regulation of nitric oxide metabolic process	4/192	41/18723	0.000806759	0.0170322	0.0135764	TLR4/TLR6/IL1B/DDAH2	4
GO:0032729	positive regulation of interferon-gamma production	5/192	72/18723	0.000863601	0.0180366	0.014377	IL18R1/TLR8/TLR4/IL1B/BCL3	5
GO:0007173	epidermal growth factor receptor signaling pathway	6/192	108/18723	0.000865576	0.0180366	0.014377	REPS2/MMP9/PLAUR/ADAM17/SHKBP1/GRB2	6
GO:0032695	negative regulation of interleukin-12 production	3/192	19/18723	0.000911435	0.0187487	0.0149446	TLR8/LILRA5/MEFV	3
GO:1901739	regulation of myoblast fusion	3/192	19/18723	0.000911435	0.0187487	0.0149446	FLOT1/MAPK14/CD53	3
GO:1904659	glucose transmembrane transport	6/192	110/18723	0.00095266	0.0194719	0.015521	IL1B/MAPK14/RTN2/SORT1/SLC2A3/HK2	6
GO:0046323	glucose import	5/192	74/18723	0.000978028	0.0197389	0.0157339	MAPK14/RTN2/SORT1/SLC2A3/HK2	5
GO:1903201	regulation of oxidative stress-induced cell death	5/192	74/18723	0.000978028	0.0197389	0.0157339	TLR4/TLR6/SOD2/MCL1/HIF1A	5
GO:0006024	glycosaminoglycan biosynthetic process	5/192	75/18723	0.00103929	0.0204117	0.0162702	ST3GAL4/CHSY1/EXT1/IL1B/ST3GAL6	5
GO:0032609	interferon-gamma production	6/192	112/18723	0.00104634	0.0204117	0.0162702	IL18R1/CR1/TLR8/TLR4/IL1B/BCL3	6
GO:0032649	regulation of interferon-gamma production	6/192	112/18723	0.00104634	0.0204117	0.0162702	IL18R1/CR1/TLR8/TLR4/IL1B/BCL3	6
GO:0046632	alpha-beta T cell differentiation	6/192	112/18723	0.00104634	0.0204117	0.0162702	IL18R1/LOXL3/BCL3/NFKBIZ/SEMA4A/STAT3	6
GO:1901222	regulation of NIK/NF-kappaB signaling	6/192	112/18723	0.00104634	0.0204117	0.0162702	IL18R1/TLR4/IL1B/BCL3/TLR2/LITAF	6
GO:0006887	exocytosis	11/192	352/18723	0.00105561	0.0204117	0.0162702	ITGAM/SDCBP/RAB33B/HCK/LAT2/CCR1/RALB/FES/STX11/STXBP5/RAB31	11
GO:0042554	superoxide anion generation	4/192	44/18723	0.00105589	0.0204117	0.0162702	NCF4/ITGAM/ALOX12/NCF2	4
GO:0098543	detection of other organism	3/192	20/18723	0.00106422	0.0204496	0.0163004	TLR4/TLR6/TLR2	3
GO:0031623	receptor internalization	6/192	113/18723	0.00109575	0.02093	0.0166833	SDCBP/FLOT1/PICALM/NUMB/GRB2/RAB31	6
GO:0015711	organic anion transport	11/192	354/18723	0.00110486	0.0209793	0.0167226	CR1/ARG1/IL1B/SLC19A1/AQP9/SLC6A6/SLC16A6/CYB5R4/FOLR3/SLC2A3/SLCO3A1	11
GO:0008645	hexose transmembrane transport	6/192	114/18723	0.00114693	0.0215755	0.0171978	IL1B/MAPK14/RTN2/SORT1/SLC2A3/HK2	6
GO:0044088	regulation of vacuole organization	4/192	45/18723	0.00114971	0.0215755	0.0171978	TBC1D14/SH3GLB1/MTMR3/RALB	4
GO:0051152	positive regulation of smooth muscle cell differentiation	3/192	21/18723	0.00123226	0.0229331	0.01828	SOD2/PIAS1/SMARCD3	3
GO:1901653	cellular response to peptide	11/192	359/18723	0.00123634	0.0229331	0.01828	TLR4/ARG1/TLR6/IL1B/SOCS3/STAT3/PTPRE/STAT5B/GRB2/SORL1/RAB31	11
GO:0015749	monosaccharide transmembrane transport	6/192	116/18723	0.00125477	0.0231412	0.0184458	IL1B/MAPK14/RTN2/SORT1/SLC2A3/HK2	6
GO:0070997	neuron death	11/192	361/18723	0.00129242	0.0236993	0.0188907	TLR4/TLR6/ITGAM/FOS/SOD2/PICALM/STAT3/HDAC4/MCL1/HIF1A/SORL1	11
GO:0045646	regulation of erythrocyte differentiation	4/192	47/18723	0.00135459	0.0246981	0.0196869	MAPK14/STAT3/STAT5B/HIF1A	4
GO:0034219	carbohydrate transmembrane transport	6/192	118/18723	0.00137021	0.0247022	0.0196901	IL1B/MAPK14/RTN2/SORT1/SLC2A3/HK2	6
GO:0071346	cellular response to interferon-gamma	6/192	118/18723	0.00137021	0.0247022	0.0196901	RAB20/TLR4/ARG1/CD58/HCK/TLR2	6
GO:0046209	nitric oxide metabolic process	5/192	81/18723	0.00146848	0.026326	0.0209844	TLR4/TLR6/IL1B/TLR2/DDAH2	5
GO:2001057	reactive nitrogen species metabolic process	5/192	82/18723	0.00155102	0.0274766	0.0219016	TLR4/TLR6/IL1B/TLR2/DDAH2	5
GO:0002224	toll-like receptor signaling pathway	6/192	121/18723	0.00155835	0.0274766	0.0219016	TLR8/TLR4/TLR6/FLOT1/TLR2/MYD88	6
GO:0038127	ERBB signaling pathway	6/192	121/18723	0.00155835	0.0274766	0.0219016	REPS2/MMP9/PLAUR/ADAM17/SHKBP1/GRB2	6
GO:0006953	acute-phase response	4/192	49/18723	0.00158368	0.0277706	0.0221359	IL1B/PLSCR1/SERPINA1/STAT3	4
GO:0035994	response to muscle stretch	3/192	23/18723	0.00161632	0.0278858	0.0222278	RAF1/FOS/MAPK14	3
GO:0050765	negative regulation of phagocytosis	3/192	23/18723	0.00161632	0.0278858	0.0222278	DYSF/PLSCR1/TLR2	3
GO:0060143	positive regulation of syncytium formation by plasma membrane fusion	3/192	23/18723	0.00161632	0.0278858	0.0222278	FLOT1/MAPK14/CD53	3
GO:0010506	regulation of autophagy	10/192	317/18723	0.00165253	0.0283582	0.0226043	TBC1D14/SH3GLB1/ATF6/MTMR3/RALB/TRIM21/STAT3/MCL1/HIF1A/MEFV	10
GO:0030168	platelet activation	6/192	123/18723	0.00169429	0.02892	0.0230522	TLR4/PLSCR1/MAPK14/MYL9/ALOX12/TREML1	6
GO:0052548	regulation of endopeptidase activity	12/192	432/18723	0.00172589	0.0293036	0.0233579	AIM2/CR1/MMP9/PLAUR/RAF1/SERPINA1/PICALM/STAT3/ALOX12/APH1B/MEFV/SORL1	12
GO:0002822	regulation of adaptive immune response based on somatic recombination of immune receptors built from immunoglobulin superfamily domains	7/192	168/18723	0.00176351	0.0295085	0.0235212	IL18R1/CR1/ARG1/IL1B/TNFSF13B/LOXL3/NFKBIZ	7
GO:0002833	positive regulation of response to biotic stimulus	7/192	168/18723	0.00176351	0.0295085	0.0235212	AIM2/TLR8/TLR4/ARG1/PLSCR1/HCK/STAT5B	7
GO:0010508	positive regulation of autophagy	6/192	124/18723	0.00176554	0.0295085	0.0235212	SH3GLB1/ATF6/RALB/TRIM21/HIF1A/MEFV	6
GO:1903510	mucopolysaccharide metabolic process	5/192	86/18723	0.00191565	0.0318514	0.0253888	ST3GAL4/CHSY1/EXT1/IL1B/ST3GAL6	5
GO:0042832	defense response to protozoan	3/192	25/18723	0.00206775	0.0332872	0.0265332	ARG1/BCL3/MYD88	3
GO:0090382	phagosome maturation	3/192	25/18723	0.00206775	0.0332872	0.0265332	RAB20/RAB32/RAB31	3
GO:0098581	detection of external biotic stimulus	3/192	25/18723	0.00206775	0.0332872	0.0265332	TLR4/TLR6/TLR2	3
GO:1905048	regulation of metallopeptidase activity	3/192	25/18723	0.00206775	0.0332872	0.0265332	PICALM/STAT3/SORL1	3
GO:0006639	acylglycerol metabolic process	6/192	128/18723	0.00207353	0.0332872	0.0265332	GK/ACSL1/ABHD5/DGAT2/ABHD2/SORL1	6
GO:0070304	positive regulation of stress-activated protein kinase signaling cascade	6/192	128/18723	0.00207353	0.0332872	0.0265332	TLR4/IL1B/SDCBP/RNF13/GADD45B/MYD88	6
GO:0002831	regulation of response to biotic stimulus	10/192	327/18723	0.00207461	0.0332872	0.0265332	AIM2/CR1/TLR8/TLR4/ARG1/PLSCR1/HCK/TRIM21/TRAFD1/STAT5B	10
GO:0001659	temperature homeostasis	7/192	174/18723	0.0021516	0.0342585	0.0273075	IL18R1/ACSL1/TLR4/IL1B/ADAM17/STAT3/G0S2	7
GO:0006638	neutral lipid metabolic process	6/192	129/18723	0.0021565	0.0342585	0.0273075	GK/ACSL1/ABHD5/DGAT2/ABHD2/SORL1	6
GO:0046330	positive regulation of JNK cascade	5/192	89/18723	0.0022276	0.0349478	0.0278569	TLR4/IL1B/SDCBP/GADD45B/MYD88	5
GO:1900407	regulation of cellular response to oxidative stress	5/192	89/18723	0.0022276	0.0349478	0.0278569	TLR4/TLR6/SOD2/MCL1/HIF1A	5
GO:2001234	negative regulation of apoptotic signaling pathway	8/192	224/18723	0.00223256	0.0349478	0.0278569	MMP9/IL1B/PLAUR/RAF1/IVNS1ABP/SOD2/MCL1/HIF1A	8
GO:0071214	cellular response to abiotic stimulus	10/192	331/18723	0.00226608	0.0350478	0.0279366	TLR8/TLR4/MMP9/IL1B/TNFRSF1A/MAPK14/SLC12A6/MYD88/HDAC4/GRB2	10
GO:0104004	cellular response to environmental stimulus	10/192	331/18723	0.00226608	0.0350478	0.0279366	TLR8/TLR4/MMP9/IL1B/TNFRSF1A/MAPK14/SLC12A6/MYD88/HDAC4/GRB2	10
GO:1902893	regulation of pri-miRNA transcription by RNA polymerase II	4/192	54/18723	0.00227172	0.0350478	0.0279366	FOS/STAT3/HDAC4/HIF1A	4
GO:0050670	regulation of lymphocyte proliferation	8/192	225/18723	0.00229501	0.0352377	0.028088	CR1/TLR4/ARG1/IL1B/TNFSF13B/BST1/MYD88/STAT5B	8
GO:0001562	response to protozoan	3/192	26/18723	0.00231994	0.0352678	0.028112	ARG1/BCL3/MYD88	3
GO:0034114	regulation of heterotypic cell-cell adhesion	3/192	26/18723	0.00231994	0.0352678	0.028112	IL1B/FLOT1/IL1RN	3
GO:0045089	positive regulation of innate immune response	6/192	131/18723	0.00232994	0.0352678	0.028112	AIM2/TLR8/TLR4/PLSCR1/HCK/STAT5B	6
GO:0002703	regulation of leukocyte mediated immunity	8/192	226/18723	0.00235881	0.0355372	0.0283267	IL18R1/CR1/TLR4/ARG1/ITGAM/IL1B/FES/STAT5B	8
GO:0032944	regulation of mononuclear cell proliferation	8/192	227/18723	0.002424	0.0359424	0.0286497	CR1/TLR4/ARG1/IL1B/TNFSF13B/BST1/MYD88/STAT5B	8
GO:0038066	p38MAPK cascade	4/192	55/18723	0.00243051	0.0359424	0.0286497	IL1B/MAPK14/GADD45B/DUSP1	4
GO:0061614	pri-miRNA transcription by RNA polymerase II	4/192	55/18723	0.00243051	0.0359424	0.0286497	FOS/STAT3/HDAC4/HIF1A	4
GO:1902991	regulation of amyloid precursor protein catabolic process	4/192	55/18723	0.00243051	0.0359424	0.0286497	PICALM/RTN2/SORL1/FLOT2	4
GO:0002275	myeloid cell activation involved in immune response	5/192	91/18723	0.00245512	0.0361399	0.0288071	DYSF/ITGAM/LAT2/FES/MYD88	5
GO:0010950	positive regulation of endopeptidase activity	7/192	179/18723	0.00252283	0.0368329	0.0293595	AIM2/CR1/PICALM/STAT3/ALOX12/APH1B/MEFV	7
GO:1903037	regulation of leukocyte cell-cell adhesion	10/192	336/18723	0.00252516	0.0368329	0.0293595	CR1/ST3GAL4/ARG1/IL1B/TNFSF13B/LOXL3/NFKBIZ/SIRPB1/STAT5B/FLOT2	10
GO:0060142	regulation of syncytium formation by plasma membrane fusion	3/192	27/18723	0.00259039	0.0373679	0.029786	FLOT1/MAPK14/CD53	3
GO:0032608	interferon-beta production	4/192	56/18723	0.00259677	0.0373679	0.029786	TLR8/TLR4/FLOT1/TLR2	4
GO:0032648	regulation of interferon-beta production	4/192	56/18723	0.00259677	0.0373679	0.029786	TLR8/TLR4/FLOT1/TLR2	4
GO:0030595	leukocyte chemotaxis	8/192	230/18723	0.00262809	0.0376498	0.0300107	BST1/CSF3R/CCR1/ADAM17/PADI2/CXCL1/DUSP1/CXCL16	8
GO:0002697	regulation of immune effector process	10/192	339/18723	0.00269168	0.0383894	0.0306002	IL18R1/CR1/TLR4/ARG1/ITGAM/IL1B/LOXL3/NFKBIZ/FES/STAT5B	10
GO:0034205	amyloid-beta formation	4/192	57/18723	0.00277068	0.0391679	0.0312207	PICALM/RTN2/APH1B/SORL1	4
GO:0060760	positive regulation of response to cytokine stimulus	4/192	57/18723	0.00277068	0.0391679	0.0312207	TLR4/TLR2/ADAM17/HIF1A	4
GO:1990830	cellular response to leukemia inhibitory factor	5/192	94/18723	0.00282743	0.0397948	0.0317205	SOCS3/PADI2/TLE4/SNX10/HK2	5
GO:0002819	regulation of adaptive immune response	7/192	183/18723	0.0028538	0.0399906	0.0318765	IL18R1/CR1/ARG1/IL1B/TNFSF13B/LOXL3/NFKBIZ	7
GO:0050671	positive regulation of lymphocyte proliferation	6/192	137/18723	0.0029136	0.040651	0.032403	TLR4/IL1B/TNFSF13B/BST1/MYD88/STAT5B	6
GO:0052547	regulation of peptidase activity	12/192	461/18723	0.00294201	0.0408697	0.0325773	AIM2/CR1/MMP9/PLAUR/RAF1/SERPINA1/PICALM/STAT3/ALOX12/APH1B/MEFV/SORL1	12
GO:0036473	cell death in response to oxidative stress	5/192	95/18723	0.00296014	0.0409443	0.0326367	TLR4/TLR6/SOD2/MCL1/HIF1A	5
GO:0032946	positive regulation of mononuclear cell proliferation	6/192	138/18723	0.00302062	0.0416015	0.0331606	TLR4/IL1B/TNFSF13B/BST1/MYD88/STAT5B	6
GO:0071375	cellular response to peptide hormone stimulus	9/192	290/18723	0.00311554	0.0424669	0.0338504	ARG1/IL1B/SOCS3/STAT3/PTPRE/STAT5B/GRB2/SORL1/RAB31	9
GO:0043123	positive regulation of I-kappaB kinase/NF-kappaB signaling	7/192	186/18723	0.00312315	0.0424669	0.0338504	TLR4/TLR6/TNFRSF1A/PELI2/TRIM21/MYD88/LITAF	7
GO:1902115	regulation of organelle assembly	7/192	186/18723	0.00312315	0.0424669	0.0338504	SDCBP/IL1RAP/TBC1D14/SH3GLB1/HCK/MTMR3/RALB	7
GO:0031334	positive regulation of protein-containing complex assembly	8/192	237/18723	0.00315667	0.0426228	0.0339746	TLR4/TLR6/SH3GLB1/HCK/FES/ABCA1/MYD88/GRB2	8
GO:0034067	protein localization to Golgi apparatus	3/192	29/18723	0.00318774	0.0426228	0.0339746	RAB33B/CSNK1D/SORL1	3
GO:0072539	T-helper 17 cell differentiation	3/192	29/18723	0.00318774	0.0426228	0.0339746	LOXL3/NFKBIZ/STAT3	3
GO:1902175	regulation of oxidative stress-induced intrinsic apoptotic signaling pathway	3/192	29/18723	0.00318774	0.0426228	0.0339746	SOD2/MCL1/HIF1A	3
GO:1990868	response to chemokine	5/192	97/18723	0.00323897	0.0429498	0.0342353	CCR1/PADI2/CXCL1/DUSP1/HIF1A	5
GO:1990869	cellular response to chemokine	5/192	97/18723	0.00323897	0.0429498	0.0342353	CCR1/PADI2/CXCL1/DUSP1/HIF1A	5
GO:0002764	immune response-regulating signaling pathway	12/192	468/18723	0.00332128	0.0436254	0.0347739	CR1/TLR8/TLR4/TLR6/FLOT1/PLSCR1/FPR1/NFKBIZ/HCK/LAT2/TLR2/MYD88	12
GO:1903039	positive regulation of leukocyte cell-cell adhesion	8/192	239/18723	0.00332193	0.0436254	0.0347739	CR1/ST3GAL4/IL1B/TNFSF13B/NFKBIZ/SIRPB1/STAT5B/FLOT2	8
GO:0009620	response to fungus	4/192	60/18723	0.00333995	0.0436254	0.0347739	CLEC4D/TLR4/ARG1/MYD88	4
GO:0001503	ossification	11/192	408/18723	0.0033443	0.0436254	0.0347739	CLEC5A/CHSY1/MMP9/EXT1/JUNB/CCR1/MAPK14/SORT1/HDAC4/HIF1A/SNX10	11
GO:0030183	B cell differentiation	6/192	141/18723	0.00335934	0.0436442	0.0347888	CR1/TNFSF13B/BCL3/ADAM17/HDAC4/STAT5B	6
GO:1902882	regulation of response to oxidative stress	5/192	98/18723	0.00338525	0.0438035	0.0349158	TLR4/TLR6/SOD2/MCL1/HIF1A	5
GO:0007009	plasma membrane organization	6/192	142/18723	0.00347829	0.0448267	0.0357314	CR1/DYSF/FLOT1/PLSCR1/SH3GLB1/FOLR3	6
GO:0070498	interleukin-1-mediated signaling pathway	3/192	30/18723	0.00351545	0.0451243	0.0359686	IL1B/IL1RN/MYD88	3
GO:0000045	autophagosome assembly	5/192	99/18723	0.00353623	0.0452103	0.0360371	TBC1D14/SH3GLB1/RAB33B/MTMR3/RALB	5
GO:0006641	triglyceride metabolic process	5/192	100/18723	0.00369199	0.0470143	0.0374751	GK/ACSL1/ABHD5/DGAT2/SORL1	5
GO:0043434	response to peptide hormone	11/192	414/18723	0.00373273	0.0473451	0.0377388	ARG1/IL1B/SOCS3/TLR2/STAT3/SORT1/PTPRE/STAT5B/GRB2/SORL1/RAB31	11
GO:0045428	regulation of nitric oxide biosynthetic process	4/192	62/18723	0.00376076	0.0475129	0.0378725	TLR4/TLR6/IL1B/DDAH2	4
GO:0007565	female pregnancy	7/192	193/18723	0.00382711	0.0481615	0.0383896	MMP9/ARG1/IL1B/SLC19A1/FOS/JUNB/STAT5B	7
GO:0070663	regulation of leukocyte proliferation	8/192	245/18723	0.00385832	0.0483646	0.0385514	CR1/TLR4/ARG1/IL1B/TNFSF13B/BST1/MYD88/STAT5B	8
GO:0050777	negative regulation of immune response	7/192	194/18723	0.00393677	0.049156	0.0391822	CR1/ARG1/LOXL3/HCK/MAPK14/TRIM21/TRAFD1	7
GO:0042886	amide transport	9/192	301/18723	0.0039775	0.049472	0.0394342	IL1B/RAF1/SLC19A1/IL1RN/AQP9/ABCA1/CYB5R4/FOLR3/HIF1A	9
GO:0070302	regulation of stress-activated protein kinase signaling cascade	7/192	195/18723	0.0040488	0.0500017	0.0398564	TLR4/IL1B/SDCBP/RNF13/GADD45B/MYD88/DUSP1	7
GO:0031098	stress-activated protein kinase signaling cascade	8/192	247/18723	0.00405124	0.0500017	0.0398564	TLR4/IL1B/SDCBP/RNF13/MAPK14/GADD45B/MYD88/DUSP1	8
GO:0033002	muscle cell proliferation	8/192	248/18723	0.00415046	0.0506726	0.0403911	TLR4/MMP9/SOD2/MAPK14/STAT3/ALOX12/MYD88/HDAC4	8
GO:0043393	regulation of protein binding	7/192	196/18723	0.00416323	0.0506726	0.0403911	MMP9/FLOT1/RALB/TRIM21/SMARCD3/HDAC4/SORL1	7
GO:0032760	positive regulation of tumor necrosis factor production	5/192	103/18723	0.00418877	0.0506726	0.0403911	TLR4/TLR2/STAT3/LILRA5/MYD88	5
GO:1905037	autophagosome organization	5/192	103/18723	0.00418877	0.0506726	0.0403911	TBC1D14/SH3GLB1/RAB33B/MTMR3/RALB	5
GO:0070542	response to fatty acid	4/192	64/18723	0.00421613	0.0506726	0.0403911	PDK3/ACSL1/DGAT2/TLR2	4
GO:0080164	regulation of nitric oxide metabolic process	4/192	64/18723	0.00421613	0.0506726	0.0403911	TLR4/TLR6/IL1B/DDAH2	4
GO:1900076	regulation of cellular response to insulin stimulus	4/192	64/18723	0.00421613	0.0506726	0.0403911	IL1B/SOCS3/PTPRE/SORL1	4
GO:0043122	regulation of I-kappaB kinase/NF-kappaB signaling	8/192	249/18723	0.00425154	0.0506965	0.0404102	TLR4/TLR6/IL1B/TNFRSF1A/PELI2/TRIM21/MYD88/LITAF	8
GO:0044272	sulfur compound biosynthetic process	6/192	148/18723	0.00425902	0.0506965	0.0404102	PDK3/ST3GAL4/CHSY1/ACSL1/EXT1/ST3GAL6	6
GO:0010952	positive regulation of peptidase activity	7/192	197/18723	0.0042801	0.0506965	0.0404102	AIM2/CR1/PICALM/STAT3/ALOX12/APH1B/MEFV	7
GO:0051251	positive regulation of lymphocyte activation	10/192	362/18723	0.00428132	0.0506965	0.0404102	CR1/TLR4/IL1B/TNFSF13B/BST1/NFKBIZ/SIRPB1/MYD88/STAT5B/FLOT2	10
GO:0048661	positive regulation of smooth muscle cell proliferation	5/192	104/18723	0.00436447	0.0514911	0.0410435	TLR4/MMP9/ALOX12/MYD88/HDAC4	5
GO:0010728	regulation of hydrogen peroxide biosynthetic process	2/192	10/18723	0.00445964	0.0520399	0.041481	SOD2/STAT3	2
GO:0070099	regulation of chemokine-mediated signaling pathway	2/192	10/18723	0.00445964	0.0520399	0.041481	PADI2/HIF1A	2
GO:1902959	regulation of aspartic-type endopeptidase activity involved in amyloid precursor protein catabolic process	2/192	10/18723	0.00445964	0.0520399	0.041481	PICALM/SORL1	2
GO:0001959	regulation of cytokine-mediated signaling pathway	6/192	150/18723	0.00454596	0.0526642	0.0419786	ARG1/IL1RN/ADAM17/PADI2/SPPL2A/HIF1A	6
GO:0070665	positive regulation of leukocyte proliferation	6/192	150/18723	0.00454596	0.0526642	0.0419786	TLR4/IL1B/TNFSF13B/BST1/MYD88/STAT5B	6
GO:0050901	leukocyte tethering or rolling	3/192	33/18723	0.00461912	0.0533193	0.0425008	ST3GAL4/EXT1/SELL	3
GO:0046626	regulation of insulin receptor signaling pathway	4/192	66/18723	0.00470735	0.0540337	0.0430703	IL1B/SOCS3/PTPRE/SORL1	4
GO:0006090	pyruvate metabolic process	5/192	106/18723	0.00473153	0.0540337	0.0430703	PDK3/STAT3/HDAC4/HIF1A/HK2	5
GO:0042116	macrophage activation	5/192	106/18723	0.00473153	0.0540337	0.0430703	TLR4/DYSF/TLR6/ITGAM/TLR2	5
GO:0016051	carbohydrate biosynthetic process	7/192	202/18723	0.0049021	0.0557831	0.0444647	ST3GAL4/EXT1/PGD/ST3GAL6/B4GALT5/DGAT2/IMPA2	7
GO:1903557	positive regulation of tumor necrosis factor superfamily cytokine production	5/192	107/18723	0.00492305	0.0558236	0.044497	TLR4/TLR2/STAT3/LILRA5/MYD88	5
GO:0050435	amyloid-beta metabolic process	4/192	67/18723	0.00496679	0.0561212	0.0447342	PICALM/RTN2/APH1B/SORL1	4
GO:0045862	positive regulation of proteolysis	10/192	372/18723	0.00517017	0.0582143	0.0464027	AIM2/CR1/IL1B/PICALM/STAT3/PIAS1/ALOX12/CSNK1D/APH1B/MEFV	10
GO:0046686	response to cadmium ion	4/192	68/18723	0.00523565	0.0587455	0.046826	MMP9/ARG1/FOS/SOD2	4
GO:0001765	membrane raft assembly	2/192	11/18723	0.00541403	0.0590939	0.0471038	FLOT1/FLOT2	2
GO:0006527	arginine catabolic process	2/192	11/18723	0.00541403	0.0590939	0.0471038	ARG1/DDAH2	2
GO:0010269	response to selenium ion	2/192	11/18723	0.00541403	0.0590939	0.0471038	ARG1/SOD2	2
GO:0032493	response to bacterial lipoprotein	2/192	11/18723	0.00541403	0.0590939	0.0471038	TLR6/TLR2	2
GO:0033483	gas homeostasis	2/192	11/18723	0.00541403	0.0590939	0.0471038	SOD2/HIF1A	2
GO:1904464	regulation of matrix metallopeptidase secretion	2/192	11/18723	0.00541403	0.0590939	0.0471038	TLR4/TLR2	2
GO:1990773	matrix metallopeptidase secretion	2/192	11/18723	0.00541403	0.0590939	0.0471038	TLR4/TLR2	2
GO:2000786	positive regulation of autophagosome assembly	2/192	11/18723	0.00541403	0.0590939	0.0471038	SH3GLB1/RALB	2
GO:0046627	negative regulation of insulin receptor signaling pathway	3/192	35/18723	0.0054587	0.0592287	0.0472112	IL1B/SOCS3/PTPRE	3
GO:0002253	activation of immune response	10/192	375/18723	0.00546328	0.0592287	0.0472112	AIM2/CR1/TLR4/C1RL/IL1B/PLSCR1/FPR1/NFKBIZ/HCK/LAT2	10
GO:0046631	alpha-beta T cell activation	6/192	156/18723	0.00549243	0.0593441	0.0473032	IL18R1/LOXL3/BCL3/NFKBIZ/SEMA4A/STAT3	6
GO:1901224	positive regulation of NIK/NF-kappaB signaling	4/192	69/18723	0.00551409	0.0593782	0.0473304	IL18R1/TLR4/IL1B/TLR2	4
GO:0045785	positive regulation of cell adhesion	11/192	437/18723	0.00556883	0.0597671	0.0476404	CR1/ST3GAL4/IL1B/TNFSF13B/PLAUR/FLOT1/NFKBIZ/SIRPB1/APBB1IP/STAT5B/FLOT2	11
GO:1902107	positive regulation of leukocyte differentiation	6/192	157/18723	0.00566318	0.060176	0.0479663	CR1/NFKBIZ/FOS/CCR1/FES/STAT5B	6
GO:1903708	positive regulation of hemopoiesis	6/192	157/18723	0.00566318	0.060176	0.0479663	CR1/NFKBIZ/FOS/CCR1/FES/STAT5B	6
GO:1990845	adaptive thermogenesis	6/192	157/18723	0.00566318	0.060176	0.0479663	IL18R1/ACSL1/TLR4/ADAM17/G0S2/SORL1	6
GO:0045123	cellular extravasation	4/192	70/18723	0.00580225	0.0614502	0.048982	ST3GAL4/EXT1/BST1/SELL	4
GO:0009895	negative regulation of catabolic process	9/192	320/18723	0.00589538	0.0621868	0.0495691	IL1B/SDCBP/TBC1D14/MAPK14/STAT3/MYD88/HDAC4/MCL1/SORL1	9
GO:0070670	response to interleukin-4	3/192	36/18723	0.00591055	0.0621868	0.0495691	ARG1/NFIL3/STAT5B	3
GO:0002526	acute inflammatory response	5/192	112/18723	0.0059639	0.0625429	0.049853	EXT1/IL1B/PLSCR1/SERPINA1/STAT3	5
GO:0032868	response to insulin	8/192	264/18723	0.00600734	0.0627933	0.0500526	IL1B/SOCS3/TLR2/SORT1/PTPRE/GRB2/SORL1/RAB31	8
GO:0002685	regulation of leukocyte migration	7/192	210/18723	0.00603589	0.0628869	0.0501271	ST3GAL4/BST1/CCR1/ADAM17/PADI2/MYD88/DUSP1	7
GO:0045824	negative regulation of innate immune response	4/192	71/18723	0.00610027	0.063352	0.0504979	CR1/ARG1/TRIM21/TRAFD1	4
GO:0046474	glycerophospholipid biosynthetic process	7/192	211/18723	0.0061903	0.0640796	0.0510778	ABHD5/PLSCR1/SOCS3/CDS2/MTMR3/IMPA2/PISD	7
GO:0002369	T cell cytokine production	3/192	37/18723	0.00638414	0.0650372	0.0518412	IL18R1/ARG1/IL1B	3
GO:0002724	regulation of T cell cytokine production	3/192	37/18723	0.00638414	0.0650372	0.0518412	IL18R1/ARG1/IL1B	3
GO:0032570	response to progesterone	3/192	37/18723	0.00638414	0.0650372	0.0518412	FOS/TLR2/ABHD2	3
GO:0045730	respiratory burst	3/192	37/18723	0.00638414	0.0650372	0.0518412	NCF4/HCK/NCF2	3
GO:1900077	negative regulation of cellular response to insulin stimulus	3/192	37/18723	0.00638414	0.0650372	0.0518412	IL1B/SOCS3/PTPRE	3
GO:0033235	positive regulation of protein sumoylation	2/192	12/18723	0.0064532	0.0651205	0.0519076	PIAS1/HDAC4	2
GO:0070943	neutrophil-mediated killing of symbiont cell	2/192	12/18723	0.0064532	0.0651205	0.0519076	ARG1/MYD88	2
GO:1905245	regulation of aspartic-type peptidase activity	2/192	12/18723	0.0064532	0.0651205	0.0519076	PICALM/SORL1	2
GO:0042058	regulation of epidermal growth factor receptor signaling pathway	4/192	73/18723	0.00672651	0.0674542	0.0537678	MMP9/PLAUR/ADAM17/SHKBP1	4
GO:0043299	leukocyte degranulation	4/192	73/18723	0.00672651	0.0674542	0.0537678	ITGAM/HCK/LAT2/FES	4
GO:0009595	detection of biotic stimulus	3/192	38/18723	0.00687973	0.06835	0.0544818	TLR4/TLR6/TLR2	3
GO:0030279	negative regulation of ossification	3/192	38/18723	0.00687973	0.06835	0.0544818	CHSY1/CCR1/HIF1A	3
GO:0072538	T-helper 17 type immune response	3/192	38/18723	0.00687973	0.06835	0.0544818	LOXL3/NFKBIZ/STAT3	3
GO:0008286	insulin receptor signaling pathway	5/192	116/18723	0.00690126	0.0683523	0.0544836	IL1B/SOCS3/PTPRE/GRB2/SORL1	5
GO:2001242	regulation of intrinsic apoptotic signaling pathway	6/192	164/18723	0.00696905	0.0688114	0.0548496	MMP9/PLAUR/IVNS1ABP/SOD2/MCL1/HIF1A	6
GO:0050870	positive regulation of T cell activation	7/192	216/18723	0.007007	0.0689113	0.0549292	CR1/IL1B/TNFSF13B/NFKBIZ/SIRPB1/STAT5B/FLOT2	7
GO:0050863	regulation of T cell activation	9/192	329/18723	0.00702212	0.0689113	0.0549292	CR1/ARG1/IL1B/TNFSF13B/LOXL3/NFKBIZ/SIRPB1/STAT5B/FLOT2	9
GO:0002437	inflammatory response to antigenic stimulus	4/192	74/18723	0.00705499	0.0690228	0.0550181	EXT1/IL1RN/HCK/MAPK14	4
GO:0014902	myotube differentiation	5/192	117/18723	0.0071508	0.0697475	0.0555957	FLOT1/MAPK14/SORT1/HDAC4/CD53	5
GO:0046942	carboxylic acid transport	8/192	273/18723	0.00729777	0.0709484	0.056553	ARG1/IL1B/SLC19A1/AQP9/SLC6A6/SLC16A6/FOLR3/SLCO3A1	8
GO:0060538	skeletal muscle organ development	6/192	166/18723	0.00737918	0.0709484	0.056553	FLOT1/BASP1/FOS/MAPK14/SVIL/HDAC4	6
GO:0046461	neutral lipid catabolic process	3/192	39/18723	0.00739756	0.0709484	0.056553	ABHD5/ABHD2/SORL1	3
GO:0046464	acylglycerol catabolic process	3/192	39/18723	0.00739756	0.0709484	0.056553	ABHD5/ABHD2/SORL1	3
GO:0090207	regulation of triglyceride metabolic process	3/192	39/18723	0.00739756	0.0709484	0.056553	ABHD5/DGAT2/SORL1	3
GO:0030203	glycosaminoglycan metabolic process	5/192	118/18723	0.00740658	0.0709484	0.056553	ST3GAL4/CHSY1/EXT1/IL1B/ST3GAL6	5
GO:0009314	response to radiation	11/192	456/18723	0.00757002	0.0712881	0.0568237	MMP9/EXT1/BCL3/FOS/SOD2/MAPK14/PIAS1/GNAQ/DUSP1/HIF1A/GRB2	11
GO:0002430	complement receptor mediated signaling pathway	2/192	13/18723	0.00757533	0.0712881	0.0568237	CR1/FPR1	2
GO:0036005	response to macrophage colony-stimulating factor	2/192	13/18723	0.00757533	0.0712881	0.0568237	TLR4/TLR2	2
GO:0036006	cellular response to macrophage colony-stimulating factor stimulus	2/192	13/18723	0.00757533	0.0712881	0.0568237	TLR4/TLR2	2
GO:0044090	positive regulation of vacuole organization	2/192	13/18723	0.00757533	0.0712881	0.0568237	SH3GLB1/RALB	2
GO:0060670	branching involved in labyrinthine layer morphogenesis	2/192	13/18723	0.00757533	0.0712881	0.0568237	SOCS3/GRB2	2
GO:0042113	B cell activation	9/192	334/18723	0.00771567	0.071978	0.0573737	CR1/TLR4/TNFSF13B/BCL3/BST1/LAT2/ADAM17/HDAC4/STAT5B	9
GO:0044706	multi-multicellular organism process	7/192	220/18723	0.00771593	0.071978	0.0573737	MMP9/ARG1/IL1B/SLC19A1/FOS/JUNB/STAT5B	7
GO:0097529	myeloid leukocyte migration	7/192	220/18723	0.00771593	0.071978	0.0573737	BST1/CSF3R/CCR1/MYD88/CXCL1/DUSP1/STAT5B	7
GO:0006809	nitric oxide biosynthetic process	4/192	76/18723	0.00774338	0.0720246	0.0574109	TLR4/TLR6/IL1B/DDAH2	4
GO:0019693	ribose phosphate metabolic process	10/192	396/18723	0.00789674	0.0732389	0.0583787	PDK3/ACSL1/PYGL/NT5C2/DGAT2/GMPR2/STAT3/HDAC4/HIF1A/HK2	10
GO:0044275	cellular carbohydrate catabolic process	3/192	40/18723	0.00793786	0.073408	0.0585135	GK/PYGL/PGD	3
GO:0007492	endoderm development	4/192	77/18723	0.00810355	0.0745108	0.0593926	MMP9/EXT1/PELO/DUSP1	4
GO:0010827	regulation of glucose transmembrane transport	4/192	77/18723	0.00810355	0.0745108	0.0593926	IL1B/MAPK14/RTN2/HK2	4
GO:0007265	Ras protein signal transduction	9/192	337/18723	0.00815622	0.0745678	0.059438	SDCBP/FLOT1/RAF1/KBTBD7/RIT1/RAB33B/RALB/ABCA1/GRB2	9
GO:0062197	cellular response to chemical stress	9/192	337/18723	0.00815622	0.0745678	0.059438	TLR4/MMP9/ARG1/TLR6/FOS/SOD2/SLC12A6/MCL1/HIF1A	9
GO:1902105	regulation of leukocyte differentiation	8/192	279/18723	0.0082676	0.0753714	0.0600786	CR1/TLR4/LOXL3/NFKBIZ/FOS/CCR1/FES/STAT5B	8
GO:0009410	response to xenobiotic stimulus	11/192	462/18723	0.00830664	0.0755128	0.0601913	AIM2/ACSL1/ARG1/IL1B/FOS/RNF149/SOD2/ADAM17/STAT3/ABCA1/HDAC4	11
GO:0007568	aging	9/192	339/18723	0.0084604	0.0766269	0.0610793	ARG1/FOS/SOD2/MAPK14/PICALM/STAT3/ALOX12/GRB2/LITAF	9
GO:0002688	regulation of leukocyte chemotaxis	5/192	122/18723	0.00849359	0.0766269	0.0610793	BST1/CCR1/ADAM17/PADI2/DUSP1	5
GO:0032735	positive regulation of interleukin-12 production	3/192	41/18723	0.00850084	0.0766269	0.0610793	TLR4/TLR2/MAPK14	3
GO:0002221	pattern recognition receptor signaling pathway	6/192	172/18723	0.00871415	0.0773918	0.061689	TLR8/TLR4/TLR6/FLOT1/TLR2/MYD88	6
GO:0002756	MyD88-independent toll-like receptor signaling pathway	2/192	14/18723	0.00877862	0.0773918	0.061689	TLR4/TLR6	2
GO:0010896	regulation of triglyceride catabolic process	2/192	14/18723	0.00877862	0.0773918	0.061689	ABHD5/SORL1	2
GO:0045820	negative regulation of glycolytic process	2/192	14/18723	0.00877862	0.0773918	0.061689	STAT3/HDAC4	2
GO:0070942	neutrophil mediated cytotoxicity	2/192	14/18723	0.00877862	0.0773918	0.061689	ARG1/MYD88	2
GO:0072540	T-helper 17 cell lineage commitment	2/192	14/18723	0.00877862	0.0773918	0.061689	LOXL3/STAT3	2
GO:1901857	positive regulation of cellular respiration	2/192	14/18723	0.00877862	0.0773918	0.061689	IFNAR1/IL10RB	2
GO:1905049	negative regulation of metallopeptidase activity	2/192	14/18723	0.00877862	0.0773918	0.061689	PICALM/SORL1	2
GO:1901184	regulation of ERBB signaling pathway	4/192	79/18723	0.00885648	0.0778642	0.0620656	MMP9/PLAUR/ADAM17/SHKBP1	4
GO:0009132	nucleoside diphosphate metabolic process	5/192	124/18723	0.00907649	0.0785963	0.0626491	STAT3/ENTPD1/HDAC4/HIF1A/HK2	5
GO:0098657	import into cell	7/192	227/18723	0.00908227	0.0785963	0.0626491	ACSL1/STEAP4/FLOT1/SLC19A1/SLC6A6/SLC12A6/SLC2A3	7
GO:0007520	myoblast fusion	3/192	42/18723	0.0090867	0.0785963	0.0626491	FLOT1/MAPK14/CD53	3
GO:0019432	triglyceride biosynthetic process	3/192	42/18723	0.0090867	0.0785963	0.0626491	GK/ACSL1/DGAT2	3
GO:0030890	positive regulation of B cell proliferation	3/192	42/18723	0.0090867	0.0785963	0.0626491	TLR4/TNFSF13B/BST1	3
GO:1902895	positive regulation of pri-miRNA transcription by RNA polymerase II	3/192	42/18723	0.0090867	0.0785963	0.0626491	FOS/STAT3/HIF1A	3
GO:0006096	glycolytic process	4/192	81/18723	0.0096537	0.0827289	0.0659432	STAT3/HDAC4/HIF1A/HK2	4
GO:0051149	positive regulation of muscle cell differentiation	4/192	81/18723	0.0096537	0.0827289	0.0659432	SOD2/MAPK14/PIAS1/SMARCD3	4
GO:0032874	positive regulation of stress-activated MAPK cascade	5/192	126/18723	0.00968645	0.0827289	0.0659432	TLR4/IL1B/SDCBP/GADD45B/MYD88	5
GO:0050728	negative regulation of inflammatory response	6/192	176/18723	0.00969514	0.0827289	0.0659432	TNFAIP6/TNFRSF1A/SOCS3/HCK/MAPK14/MEFV	6
GO:0006509	membrane protein ectodomain proteolysis	3/192	43/18723	0.00969564	0.0827289	0.0659432	IL1B/ADAM17/SPPL2A	3
GO:0045055	regulated exocytosis	7/192	230/18723	0.00971916	0.0827289	0.0659432	ITGAM/HCK/LAT2/FES/STX11/STXBP5/RAB31	7
GO:0034599	cellular response to oxidative stress	8/192	288/18723	0.00989981	0.0836013	0.0666386	TLR4/MMP9/ARG1/TLR6/FOS/SOD2/MCL1/HIF1A	8
GO:0046651	lymphocyte proliferation	8/192	288/18723	0.00989981	0.0836013	0.0666386	CR1/TLR4/ARG1/IL1B/TNFSF13B/BST1/MYD88/STAT5B	8
GO:0097193	intrinsic apoptotic signaling pathway	8/192	288/18723	0.00989981	0.0836013	0.0666386	MMP9/TNFRSF1A/BCL3/PLAUR/IVNS1ABP/SOD2/MCL1/HIF1A	8
GO:0010940	positive regulation of necrotic cell death	2/192	15/18723	0.0100613	0.0837102	0.0667254	SLC6A6/HEBP2	2
GO:0018146	keratan sulfate biosynthetic process	2/192	15/18723	0.0100613	0.0837102	0.0667254	ST3GAL4/ST3GAL6	2
GO:0090594	inflammatory response to wounding	2/192	15/18723	0.0100613	0.0837102	0.0667254	TLR4/HIF1A	2
GO:1904889	regulation of excitatory synapse assembly	2/192	15/18723	0.0100613	0.0837102	0.0667254	IL1RAP/SEMA4A	2
GO:0001892	embryonic placenta development	4/192	82/18723	0.0100692	0.0837102	0.0667254	SOCS3/JUNB/HIF1A/GRB2	4
GO:0006757	ATP generation from ADP	4/192	82/18723	0.0100692	0.0837102	0.0667254	STAT3/HDAC4/HIF1A/HK2	4
GO:0002449	lymphocyte mediated immunity	9/192	350/18723	0.0102904	0.084762	0.0675638	IL18R1/CR1/TLR8/ARG1/C1RL/IL1B/BCL3/MYD88/STAT5B	9
GO:0050999	regulation of nitric-oxide synthase activity	3/192	44/18723	0.0103278	0.084762	0.0675638	IL1B/DDAH2/HIF1A	3
GO:0051150	regulation of smooth muscle cell differentiation	3/192	44/18723	0.0103278	0.084762	0.0675638	SOD2/PIAS1/SMARCD3	3
GO:0060711	labyrinthine layer development	3/192	44/18723	0.0103278	0.084762	0.0675638	SOCS3/JUNB/GRB2	3
GO:0062208	positive regulation of pattern recognition receptor signaling pathway	3/192	44/18723	0.0103278	0.084762	0.0675638	TLR4/FLOT1/TLR2	3
GO:0045861	negative regulation of proteolysis	9/192	351/18723	0.0104705	0.0856862	0.0683005	CR1/MMP9/SDCBP/PLAUR/RAF1/SERPINA1/TRIM21/PICALM/SORL1	9
GO:0032943	mononuclear cell proliferation	8/192	291/18723	0.0104938	0.0856862	0.0683005	CR1/TLR4/ARG1/IL1B/TNFSF13B/BST1/MYD88/STAT5B	8
GO:0048660	regulation of smooth muscle cell proliferation	6/192	180/18723	0.0107525	0.0875756	0.0698065	TLR4/MMP9/SOD2/ALOX12/MYD88/HDAC4	6
GO:1900542	regulation of purine nucleotide metabolic process	4/192	84/18723	0.0109347	0.0882605	0.0703524	PDK3/STAT3/HDAC4/HIF1A	4
GO:0006110	regulation of glycolytic process	3/192	45/18723	0.0109834	0.0882605	0.0703524	STAT3/HDAC4/HIF1A	3
GO:0008631	intrinsic apoptotic signaling pathway in response to oxidative stress	3/192	45/18723	0.0109834	0.0882605	0.0703524	SOD2/MCL1/HIF1A	3
GO:0051180	vitamin transport	3/192	45/18723	0.0109834	0.0882605	0.0703524	SLC19A1/FOLR3/SLC2A3	3
GO:0043467	regulation of generation of precursor metabolites and energy	5/192	130/18723	0.0109898	0.0882605	0.0703524	IFNAR1/STAT3/HDAC4/IL10RB/HIF1A	5
GO:0032640	tumor necrosis factor production	6/192	181/18723	0.0110291	0.0882605	0.0703524	TLR4/BCL3/TLR2/STAT3/LILRA5/MYD88	6
GO:0032680	regulation of tumor necrosis factor production	6/192	181/18723	0.0110291	0.0882605	0.0703524	TLR4/BCL3/TLR2/STAT3/LILRA5/MYD88	6
GO:0032092	positive regulation of protein binding	4/192	85/18723	0.0113848	0.0893955	0.0712572	MMP9/FLOT1/RALB/TRIM21	4
GO:0055072	iron ion homeostasis	4/192	85/18723	0.0113848	0.0893955	0.0712572	STEAP4/SLC40A1/PICALM/HIF1A	4
GO:2001233	regulation of apoptotic signaling pathway	9/192	356/18723	0.0114067	0.0893955	0.0712572	MMP9/IL1B/PLAUR/RAF1/IVNS1ABP/SOD2/G0S2/MCL1/HIF1A	9
GO:0002827	positive regulation of T-helper 1 type immune response	2/192	16/18723	0.0114217	0.0893955	0.0712572	IL18R1/IL1B	2
GO:0030949	positive regulation of vascular endothelial growth factor receptor signaling pathway	2/192	16/18723	0.0114217	0.0893955	0.0712572	IL1B/HIF1A	2
GO:0034116	positive regulation of heterotypic cell-cell adhesion	2/192	16/18723	0.0114217	0.0893955	0.0712572	IL1B/FLOT1	2
GO:0051770	positive regulation of nitric-oxide synthase biosynthetic process	2/192	16/18723	0.0114217	0.0893955	0.0712572	TLR4/TLR2	2
GO:2001044	regulation of integrin-mediated signaling pathway	2/192	16/18723	0.0114217	0.0893955	0.0712572	LOXL3/BST1	2
GO:2001267	regulation of cysteine-type endopeptidase activity involved in apoptotic signaling pathway	2/192	16/18723	0.0114217	0.0893955	0.0712572	MMP9/PLAUR	2
GO:0048193	Golgi vesicle transport	8/192	296/18723	0.0115421	0.0901183	0.0718333	TBC1D14/RAB33B/RP2/SORT1/CSNK1D/CNIH4/SORL1/RAB31	8
GO:0061028	establishment of endothelial barrier	3/192	46/18723	0.0116625	0.0908374	0.0724066	IL1B/TNFRSF1A/MYD88	3
GO:0051403	stress-activated MAPK cascade	7/192	239/18723	0.0118258	0.0918265	0.0731949	TLR4/IL1B/SDCBP/MAPK14/GADD45B/MYD88/DUSP1	7
GO:0006140	regulation of nucleotide metabolic process	4/192	86/18723	0.0118467	0.0918265	0.0731949	PDK3/STAT3/HDAC4/HIF1A	4
GO:0048659	smooth muscle cell proliferation	6/192	184/18723	0.0118892	0.0919336	0.0732803	TLR4/MMP9/SOD2/ALOX12/MYD88/HDAC4	6
GO:0009306	protein secretion	9/192	359/18723	0.0119977	0.0925496	0.0737713	TLR4/IL1B/RAF1/IL1RN/TLR2/ABCA1/CYB5R4/STXBP5/HIF1A	9
GO:0046328	regulation of JNK cascade	5/192	133/18723	0.0120426	0.0926733	0.0738699	TLR4/IL1B/SDCBP/GADD45B/MYD88	5
GO:0035592	establishment of protein localization to extracellular region	9/192	360/18723	0.0121997	0.0933655	0.0744217	TLR4/IL1B/RAF1/IL1RN/TLR2/ABCA1/CYB5R4/STXBP5/HIF1A	9
GO:0001776	leukocyte homeostasis	4/192	87/18723	0.0123205	0.0933655	0.0744217	TNFSF13B/ADAM17/STAT5B/HIF1A	4
GO:0150104	transport across blood-brain barrier	4/192	87/18723	0.0123205	0.0933655	0.0744217	SLC19A1/SLC6A6/SLC2A3/SLCO3A1	4
GO:0001774	microglial cell activation	3/192	47/18723	0.0123653	0.0933655	0.0744217	TLR6/ITGAM/TLR2	3
GO:0007595	lactation	3/192	47/18723	0.0123653	0.0933655	0.0744217	STAT5B/HIF1A/HK2	3
GO:0035850	epithelial cell differentiation involved in kidney development	3/192	47/18723	0.0123653	0.0933655	0.0744217	MMP9/EXT1/BASP1	3
GO:0120163	negative regulation of cold-induced thermogenesis	3/192	47/18723	0.0123653	0.0933655	0.0744217	IL18R1/TLR4/ADAM17	3
GO:1900744	regulation of p38MAPK cascade	3/192	47/18723	0.0123653	0.0933655	0.0744217	IL1B/GADD45B/DUSP1	3
GO:0002705	positive regulation of leukocyte mediated immunity	5/192	134/18723	0.0124082	0.0934696	0.0745046	IL18R1/ARG1/ITGAM/IL1B/STAT5B	5
GO:0071706	tumor necrosis factor superfamily cytokine production	6/192	186/18723	0.0124882	0.093565	0.0745807	TLR4/BCL3/TLR2/STAT3/LILRA5/MYD88	6
GO:1903555	regulation of tumor necrosis factor superfamily cytokine production	6/192	186/18723	0.0124882	0.093565	0.0745807	TLR4/BCL3/TLR2/STAT3/LILRA5/MYD88	6
GO:0006091	generation of precursor metabolites and energy	11/192	490/18723	0.0125084	0.093565	0.0745807	PYGL/STEAP4/PGD/IFNAR1/STAT3/NCF2/CYB5R4/HDAC4/IL10RB/HIF1A/HK2	11
GO:0010232	vascular transport	4/192	88/18723	0.0128063	0.0942261	0.0751077	SLC19A1/SLC6A6/SLC2A3/SLCO3A1	4
GO:0070098	chemokine-mediated signaling pathway	4/192	88/18723	0.0128063	0.0942261	0.0751077	CCR1/PADI2/CXCL1/HIF1A	4
GO:0051098	regulation of binding	9/192	363/18723	0.012821	0.0942261	0.0751077	MMP9/BCL3/PLAUR/FLOT1/RALB/TRIM21/SMARCD3/HDAC4/SORL1	9
GO:0016045	detection of bacterium	2/192	17/18723	0.012858	0.0942261	0.0751077	TLR6/TLR2	2
GO:0042339	keratan sulfate metabolic process	2/192	17/18723	0.012858	0.0942261	0.0751077	ST3GAL4/ST3GAL6	2
GO:0042448	progesterone metabolic process	2/192	17/18723	0.012858	0.0942261	0.0751077	STAT5B/DHRS9	2
GO:1901550	regulation of endothelial cell development	2/192	17/18723	0.012858	0.0942261	0.0751077	IL1B/TNFRSF1A	2
GO:1903140	regulation of establishment of endothelial barrier	2/192	17/18723	0.012858	0.0942261	0.0751077	IL1B/TNFRSF1A	2
GO:0009896	positive regulation of catabolic process	11/192	492/18723	0.012861	0.0942261	0.0751077	IL1B/ABHD5/SH3GLB1/ATF6/RALB/TRIM21/PIAS1/CSNK1D/HIF1A/MEFV/SORL1	11
GO:0031331	positive regulation of cellular catabolic process	10/192	427/18723	0.0129237	0.0944695	0.0753017	IL1B/ABHD5/SH3GLB1/ATF6/RALB/TRIM21/PIAS1/CSNK1D/HIF1A/MEFV	10
GO:1902003	regulation of amyloid-beta formation	3/192	48/18723	0.013092	0.095482	0.0761087	PICALM/RTN2/SORL1	3
GO:0051222	positive regulation of protein transport	8/192	303/18723	0.0131371	0.0955938	0.0761979	TLR4/ITGAM/IL1B/SH3GLB1/TLR2/MAPK14/HIF1A/SORL1	8

## Sheet: C2
ID	Description	GeneRatio	BgRatio	pvalue	p.adjust	qvalue	geneID	Count
GO:0022900	electron transport chain	11/123	175/18723	2.16244e-08	4.53463e-05	4.25431e-05	SCO2/AKR7A2/NDUFA12/NDUFA8/NDUFA13/NDUFS3/NDUFA7/NDUFS8/NDUFB2/COX5A/COX8A	11
GO:0022904	respiratory electron transport chain	9/123	114/18723	6.15992e-08	6.45868e-05	6.05942e-05	SCO2/NDUFA12/NDUFA8/NDUFS3/NDUFA7/NDUFS8/NDUFB2/COX5A/COX8A	9
GO:0033108	mitochondrial respiratory chain complex assembly	8/123	93/18723	1.7615e-07	8.72164e-05	8.18249e-05	SCO2/NDUFA12/NDUFA8/NDUFA13/NDUFS3/COX17/NDUFS8/NDUFB2	8
GO:0042773	ATP synthesis coupled electron transport	8/123	95/18723	2.07955e-07	8.72164e-05	8.18249e-05	NDUFA12/NDUFA8/NDUFS3/NDUFA7/NDUFS8/NDUFB2/COX5A/COX8A	8
GO:0042775	mitochondrial ATP synthesis coupled electron transport	8/123	95/18723	2.07955e-07	8.72164e-05	8.18249e-05	NDUFA12/NDUFA8/NDUFS3/NDUFA7/NDUFS8/NDUFB2/COX5A/COX8A	8
GO:0006091	generation of precursor metabolites and energy	15/123	490/18723	7.85297e-07	0.000274461	0.000257495	SCO2/P2RX7/AKR7A2/RPIA/NDUFA12/NDUFA8/NDUFA13/SLC25A14/NDUFS3/NDUFA7/COX17/NDUFS8/NDUFB2/COX5A/COX8A	15
GO:0019646	aerobic electron transport chain	7/123	87/18723	1.68169e-06	0.000457179	0.000428917	NDUFA8/NDUFS3/NDUFA7/NDUFS8/NDUFB2/COX5A/COX8A	7
GO:0010257	NADH dehydrogenase complex assembly	6/123	57/18723	1.96214e-06	0.000457179	0.000428917	NDUFA12/NDUFA8/NDUFA13/NDUFS3/NDUFS8/NDUFB2	6
GO:0032981	mitochondrial respiratory chain complex I assembly	6/123	57/18723	1.96214e-06	0.000457179	0.000428917	NDUFA12/NDUFA8/NDUFA13/NDUFS3/NDUFS8/NDUFB2	6
GO:0045333	cellular respiration	10/123	230/18723	2.87487e-06	0.000602861	0.000565593	SCO2/NDUFA12/NDUFA8/SLC25A14/NDUFS3/NDUFA7/NDUFS8/NDUFB2/COX5A/COX8A	10
GO:0055076	transition metal ion homeostasis	8/123	138/18723	3.58887e-06	0.000684169	0.000641875	MT2A/SCO2/LCN2/SLC31A2/COMMD1/SOD1/SLC25A28/MT1X	8
GO:0006119	oxidative phosphorylation	8/123	141/18723	4.21222e-06	0.00070984	0.000665959	NDUFA12/NDUFA8/NDUFS3/NDUFA7/NDUFS8/NDUFB2/COX5A/COX8A	8
GO:0009060	aerobic respiration	9/123	189/18723	4.40053e-06	0.00070984	0.000665959	NDUFA12/NDUFA8/SLC25A14/NDUFS3/NDUFA7/NDUFS8/NDUFB2/COX5A/COX8A	9
GO:0055070	copper ion homeostasis	4/123	18/18723	5.05387e-06	0.000756997	0.000710201	MT2A/SCO2/SLC31A2/COMMD1	4
GO:0006120	mitochondrial electron transport, NADH to ubiquinone	5/123	51/18723	2.07997e-05	0.00268773	0.00252158	NDUFA8/NDUFS3/NDUFA7/NDUFS8/NDUFB2	5
GO:0032612	interleukin-1 production	7/123	128/18723	2.1789e-05	0.00268773	0.00252158	RIPK2/P2RX7/GHRL/CD33/GAS6/AIM2/GBP5	7
GO:0032652	regulation of interleukin-1 production	7/123	128/18723	2.1789e-05	0.00268773	0.00252158	RIPK2/P2RX7/GHRL/CD33/GAS6/AIM2/GBP5	7
GO:0032103	positive regulation of response to external stimulus	12/123	427/18723	2.48892e-05	0.00289959	0.00272034	RIPK2/IL1B/LY86/GHRL/PLA2G7/MGST2/ZBP1/IL15/GAS6/AIM2/GBP5/VAMP8	12
GO:0015980	energy derivation by oxidation of organic compounds	10/123	318/18723	4.78087e-05	0.00527657	0.00495038	SCO2/NDUFA12/NDUFA8/SLC25A14/NDUFS3/NDUFA7/NDUFS8/NDUFB2/COX5A/COX8A	10
GO:0051607	defense response to virus	9/123	265/18723	6.42693e-05	0.00641775	0.00602102	HERC5/IFI44L/ISG20/IFI27/ZBP1/IL15/AIM2/VAMP8/IFIT1	9
GO:0140546	defense response to symbiont	9/123	265/18723	6.42693e-05	0.00641775	0.00602102	HERC5/IFI44L/ISG20/IFI27/ZBP1/IL15/AIM2/VAMP8/IFIT1	9
GO:0050766	positive regulation of phagocytosis	5/123	66/18723	7.31541e-05	0.00697292	0.00654187	C2/IL1B/IL15/GAS6/SOD1	5
GO:0032611	interleukin-1 beta production	6/123	110/18723	8.72514e-05	0.00747692	0.00701471	RIPK2/P2RX7/GHRL/CD33/AIM2/GBP5	6
GO:0032651	regulation of interleukin-1 beta production	6/123	110/18723	8.72514e-05	0.00747692	0.00701471	RIPK2/P2RX7/GHRL/CD33/AIM2/GBP5	6
GO:0046034	ATP metabolic process	9/123	277/18723	9.01951e-05	0.00747692	0.00701471	P2RX7/NDUFA12/NDUFA8/NDUFS3/NDUFA7/NDUFS8/NDUFB2/COX5A/COX8A	9
GO:0031349	positive regulation of defense response	9/123	278/18723	9.27038e-05	0.00747692	0.00701471	RIPK2/IL1B/PLA2G7/MGST2/ZBP1/IL15/AIM2/GBP5/VAMP8	9
GO:0046916	cellular transition metal ion homeostasis	6/123	115/18723	0.000111607	0.00866811	0.00813226	MT2A/SCO2/LCN2/SLC31A2/SOD1/MT1X	6
GO:0006878	cellular copper ion homeostasis	3/123	15/18723	0.000118831	0.00889956	0.00834941	MT2A/SCO2/SLC31A2	3
GO:0009615	response to virus	10/123	367/18723	0.000156069	0.0112854	0.0105878	HERC5/IFI44L/ISG20/IFI27/ZBP1/IL15/NPC2/AIM2/VAMP8/IFIT1	10
GO:0007009	plasma membrane organization	6/123	142/18723	0.000351479	0.0237759	0.0223061	P2RX7/FOLR2/OTOF/CHMP4A/SOD1/EPB41L3	6
GO:0050729	positive regulation of inflammatory response	6/123	142/18723	0.000351479	0.0237759	0.0223061	IL1B/PLA2G7/MGST2/ZBP1/IL15/VAMP8	6
GO:0050764	regulation of phagocytosis	5/123	95/18723	0.00040762	0.0267119	0.0250606	C2/IL1B/IL15/GAS6/SOD1	5
GO:0032731	positive regulation of interleukin-1 beta production	4/123	62/18723	0.000737205	0.046846	0.0439501	RIPK2/P2RX7/AIM2/GBP5	4
GO:0046825	regulation of protein export from nucleus	3/123	30/18723	0.000986773	0.0608607	0.0570984	IL1B/IFI27/GAS6	3
GO:0050727	regulation of inflammatory response	9/123	386/18723	0.00102234	0.061253	0.0574665	IL1B/GHRL/PLA2G7/MGST2/ZBP1/IL15/TNFAIP6/SOD1/VAMP8	9
GO:0050688	regulation of defense response to virus	4/123	69/18723	0.00110283	0.0642397	0.0602685	HERC5/IL15/AIM2/IFIT1	4
GO:0071295	cellular response to vitamin	3/123	33/18723	0.00130718	0.0740855	0.0695057	FOLR2/IL15/GAS6	3
GO:0032732	positive regulation of interleukin-1 production	4/123	73/18723	0.00136079	0.075094	0.0704518	RIPK2/P2RX7/AIM2/GBP5	4
GO:0002831	regulation of response to biotic stimulus	8/123	327/18723	0.00143906	0.0773771	0.0725938	RIPK2/LY86/HERC5/ZBP1/IL15/AIM2/GBP5/IFIT1	8

## Sheet: C3
Supplementary Table 6. Gene ontology enrichment analysis results of inferred PTB subtypes.
ID	Description	GeneRatio	BgRatio	pvalue	p.adjust	qvalue	geneID	Count
GO:0002717	positive regulation of natural killer cell mediated immunity	5/192	31/18723	1.47271e-05	0.0170085	0.0158227	SH2D1A/SH2D1B/SLAMF6/CD160/KLRD1	5
GO:0009156	ribonucleoside monophosphate biosynthetic process	5/192	33/18723	2.02319e-05	0.0170085	0.0158227	PRPS1/PFAS/UCKL1/ATIC/ADSL	5
GO:0009161	ribonucleoside monophosphate metabolic process	6/192	58/18723	2.79468e-05	0.0170085	0.0158227	PRPS1/PFAS/UCKL1/AK3/ATIC/ADSL	6
GO:0046631	alpha-beta T cell activation	9/192	156/18723	3.39173e-05	0.0170085	0.0158227	CBLB/GPR18/EOMES/ITK/HSPH1/BCL11B/LY9/SLAMF6/CD160	9
GO:0043368	positive T cell selection	5/192	37/18723	3.59436e-05	0.0170085	0.0158227	CD3D/CD3G/BCL11B/LY9/SLAMF6	5
GO:0042110	T cell activation	16/192	487/18723	4.41643e-05	0.0174155	0.0162013	ICOS/CD3D/CBLB/GPR18/CD3G/EOMES/ITK/HSPH1/CD6/BCL11B/CD8A/LY9/SLAMF6/CD160/METTL3/IL7R	16
GO:0009124	nucleoside monophosphate biosynthetic process	5/192	42/18723	6.72928e-05	0.0211796	0.019703	PRPS1/PFAS/UCKL1/ATIC/ADSL	5
GO:0030217	T cell differentiation	11/192	257/18723	7.23636e-05	0.0211796	0.019703	CD3D/GPR18/CD3G/EOMES/ITK/BCL11B/CD8A/LY9/SLAMF6/METTL3/IL7R	11
GO:0002228	natural killer cell mediated immunity	6/192	71/18723	8.85615e-05	0.0211796	0.019703	SH2D1A/SH2D1B/GZMB/SLAMF6/CD160/KLRD1	6
GO:0002703	regulation of leukocyte mediated immunity	10/192	226/18723	0.000117581	0.0211796	0.019703	SH2D1A/THOC1/SH2D1B/SNX4/SLAMF6/CD160/BLK/KLRD1/IL7R/MLH1	10
GO:0002715	regulation of natural killer cell mediated immunity	5/192	48/18723	0.000128878	0.0211796	0.019703	SH2D1A/SH2D1B/SLAMF6/CD160/KLRD1	5
GO:0009123	nucleoside monophosphate metabolic process	6/192	76/18723	0.000129579	0.0211796	0.019703	PRPS1/PFAS/UCKL1/AK3/ATIC/ADSL	6
GO:1903131	mononuclear cell differentiation	14/192	426/18723	0.000133333	0.0211796	0.019703	CD3D/GPR18/CD3G/EOMES/ITK/BCL11B/CD8A/LY9/SLAMF6/BLK/METTL3/MS4A1/IL7R/DNAJB9	14
GO:0030098	lymphocyte differentiation	13/192	374/18723	0.000133925	0.0211796	0.019703	CD3D/GPR18/CD3G/EOMES/ITK/BCL11B/CD8A/LY9/SLAMF6/METTL3/MS4A1/IL7R/DNAJB9	13
GO:0045954	positive regulation of natural killer cell mediated cytotoxicity	4/192	26/18723	0.000134275	0.0211796	0.019703	SH2D1A/SLAMF6/CD160/KLRD1	4
GO:0045058	T cell selection	5/192	50/18723	0.00015685	0.0216717	0.0201608	CD3D/CD3G/BCL11B/LY9/SLAMF6	5
GO:0002683	negative regulation of immune system process	14/192	434/18723	0.000161749	0.0216717	0.0201608	CBLB/GPR18/SH2D1A/RNF125/THOC1/BANK1/C1QBP/CD160/BLK/KLRD1/LYAR/SYT11/METTL3/IL7R	14
GO:0006188	IMP biosynthetic process	3/192	11/18723	0.000164873	0.0216717	0.0201608	PFAS/ATIC/ADSL	3
GO:0002697	regulation of immune effector process	12/192	339/18723	0.000205416	0.0255797	0.0237964	SH2D1A/THOC1/SH2D1B/SNX4/C1QBP/SLAMF6/CD160/BLK/KLRD1/IL7R/MLH1/DNAJB9	12
GO:0006403	RNA localization	9/192	201/18723	0.00023609	0.0279294	0.0259823	DKC1/NUP107/THOC1/CCT2/NUP160/FBL/NUP43/NSUN2/TOMM20	9
GO:0002706	regulation of lymphocyte mediated immunity	8/192	168/18723	0.000347483	0.0391498	0.0364204	SH2D1A/THOC1/SH2D1B/SLAMF6/CD160/KLRD1/IL7R/MLH1	8
GO:0006364	rRNA processing	9/192	225/18723	0.000538782	0.0579436	0.053904	DKC1/PWP1/MPHOSPH10/IMP3/WDR36/FBL/RPUSD4/LYAR/WDR12	9
GO:0002831	regulation of response to biotic stimulus	11/192	327/18723	0.0005781	0.0594689	0.0553229	PYHIN1/SH2D1A/RNF125/SH2D1B/C1QBP/SLAMF6/CD160/KLRD1/LYAR/SYT11/METTL3	11
GO:0002443	leukocyte mediated immunity	13/192	440/18723	0.00063607	0.0627059	0.0583343	SH2D1A/THOC1/SH2D1B/SNX4/GZMB/CD8A/C1QBP/SLAMF6/CD160/BLK/KLRD1/IL7R/MLH1	13
GO:0042267	natural killer cell mediated cytotoxicity	5/192	68/18723	0.000664988	0.0629344	0.0585469	SH2D1A/GZMB/SLAMF6/CD160/KLRD1	5
GO:0002699	positive regulation of immune effector process	9/192	235/18723	0.000735391	0.0653471	0.0607914	SH2D1A/SH2D1B/SNX4/SLAMF6/CD160/BLK/KLRD1/MLH1/DNAJB9	9
GO:0016072	rRNA metabolic process	9/192	236/18723	0.000757908	0.0653471	0.0607914	DKC1/PWP1/MPHOSPH10/IMP3/WDR36/FBL/RPUSD4/LYAR/WDR12	9
GO:0046040	IMP metabolic process	3/192	18/18723	0.000773338	0.0653471	0.0607914	PFAS/ATIC/ADSL	3
GO:0009167	purine ribonucleoside monophosphate metabolic process	4/192	41/18723	0.000806759	0.0658204	0.0612317	PFAS/AK3/ATIC/ADSL	4
GO:0050777	negative regulation of immune response	8/192	194/18723	0.000897631	0.0695631	0.0647134	RNF125/THOC1/C1QBP/CD160/KLRD1/LYAR/METTL3/IL7R	8
GO:0009168	purine ribonucleoside monophosphate biosynthetic process	3/192	19/18723	0.000911435	0.0695631	0.0647134	PFAS/ATIC/ADSL	3
GO:0002449	lymphocyte mediated immunity	11/192	350/18723	0.00100819	0.0700685	0.0651836	SH2D1A/THOC1/SH2D1B/GZMB/CD8A/C1QBP/SLAMF6/CD160/KLRD1/IL7R/MLH1	11
GO:0046632	alpha-beta T cell differentiation	6/192	112/18723	0.00104634	0.0700685	0.0651836	GPR18/EOMES/ITK/BCL11B/LY9/SLAMF6	6
GO:0009126	purine nucleoside monophosphate metabolic process	4/192	44/18723	0.00105589	0.0700685	0.0651836	PFAS/AK3/ATIC/ADSL	4
GO:0042269	regulation of natural killer cell mediated cytotoxicity	4/192	44/18723	0.00105589	0.0700685	0.0651836	SH2D1A/SLAMF6/CD160/KLRD1	4
GO:0042254	ribosome biogenesis	10/192	299/18723	0.00106902	0.0700685	0.0651836	DKC1/PWP1/MPHOSPH10/IMP3/WDR36/C1QBP/FBL/RPUSD4/LYAR/WDR12	10
GO:0002708	positive regulation of lymphocyte mediated immunity	6/192	113/18723	0.00109575	0.0700685	0.0651836	SH2D1A/SH2D1B/SLAMF6/CD160/KLRD1/MLH1	6
GO:0009127	purine nucleoside monophosphate biosynthetic process	3/192	21/18723	0.00123226	0.0767246	0.0713756	PFAS/ATIC/ADSL	3
GO:0050860	negative regulation of T cell receptor signaling pathway	3/192	22/18723	0.00141612	0.0859112	0.0799218	CBLB/SH2D1A/CD160	3
GO:0001910	regulation of leukocyte mediated cytotoxicity	5/192	82/18723	0.00155102	0.0917431	0.0853471	SH2D1A/SLAMF6/CD160/KLRD1/IL7R	5
GO:0002253	activation of immune response	11/192	375/18723	0.00174644	0.0994589	0.092525	PLEKHA1/PYHIN1/CBLB/SH2D1A/ITK/BANK1/C1QBP/CD160/BLK/KLRD1/MS4A1	11
GO:0001909	leukocyte mediated cytotoxicity	6/192	124/18723	0.00176554	0.0994589	0.092525	SH2D1A/GZMB/SLAMF6/CD160/KLRD1/IL7R	6
