# Supplementary material
Source: publisher site journal article supplement (doi:10.18632/aging.206048)
Supplement: Supplementary file 7 [file aging-v16-206048-supplementary-material-SD8.xlsx]

## Sheet: C1
Supplementary Table 7. KEGG enrichment analysis results of inferred PTB subtypes.
ID	Description	GeneRatio	BgRatio	pvalue	p.adjust	qvalue	geneID	Count
hsa05140	Leishmaniasis	10/98	73/5894	2.65241e-07	3.28898e-05	2.84785e-05	CR1/TLR4/NCF4/ITGAM/IL1B/FOS/TLR2/MAPK14/NCF2/MYD88	10
hsa04380	Osteoclast differentiation	11/98	128/5894	7.42481e-06	0.000460338	0.000398595	NCF4/IL1B/TNFRSF1A/IFNAR1/SOCS3/FOS/JUNB/MAPK14/SIRPB1/NCF2/GRB2	11
hsa04620	Toll-like receptor signaling pathway	9/98	102/5894	4.28508e-05	0.00155039	0.00134244	TLR8/TLR4/TLR6/IL1B/IFNAR1/FOS/TLR2/MAPK14/MYD88	9
hsa05142	Chagas disease (American trypanosomiasis)	9/98	104/5894	5.00125e-05	0.00155039	0.00134244	TLR4/TLR6/IL1B/TNFRSF1A/FOS/TLR2/MAPK14/MYD88/GNAQ	9
hsa04630	Jak-STAT signaling pathway	9/98	155/5894	0.00101725	0.024842	0.02151	IFNAR1/SOCS3/CSF3R/STAT3/PIAS1/IL13RA1/IL10RB/STAT5B/GRB2	9
hsa04060	Cytokine-cytokine receptor interaction	12/98	265/5894	0.00136319	0.024842	0.02151	IL18R1/IL1B/TNFRSF1A/TNFSF13B/IFNAR1/IL1RAP/CSF3R/CCR1/IL13RA1/CXCL1/IL10RB/CXCL16	12
hsa05144	Malaria	5/98	51/5894	0.00147088	0.024842	0.02151	CR1/TLR4/IL1B/TLR2/MYD88	5
hsa05160	Hepatitis C	8/98	135/5894	0.00171306	0.024842	0.02151	TNFRSF1A/IFNAR1/RAF1/SOCS3/MAPK14/STAT3/PIAS1/GRB2	8
hsa05146	Amoebiasis	7/98	106/5894	0.00180305	0.024842	0.02151	TLR4/ARG1/ITGAM/IL1B/TLR2/GNAQ/CXCL1	7
hsa05323	Rheumatoid arthritis	6/98	92/5894	0.00408562	0.0506617	0.0438666	TLR4/IL1B/TNFSF13B/FOS/TLR2/CXCL1	6
hsa05145	Toxoplasmosis	7/98	133/5894	0.00640054	0.0721515	0.0624742	TLR4/TNFRSF1A/TLR2/MAPK14/STAT3/MYD88/IL10RB	7
hsa04910	Insulin signaling pathway	7/98	138/5894	0.00779541	0.0805526	0.0697484	PYGL/FLOT1/RAF1/SOCS3/GRB2/HK2/FLOT2	7

## Sheet: C2
ID	Description	GeneRatio	BgRatio	pvalue	p.adjust	qvalue	geneID	Count
hsa05016	Huntington's disease	12/66	183/5894	6.36703e-07	4.77527e-05	4.28937e-05	POLR2G/AP2S1/NDUFA12/NDUFA8/NDUFA13/SOD1/NDUFS3/NDUFA7/NDUFS8/NDUFB2/COX5A/COX8A	12
hsa00190	Oxidative phosphorylation	10/66	132/5894	1.64e-06	6.15e-05	5.52421e-05	NDUFA12/NDUFA8/NDUFA13/NDUFS3/NDUFA7/COX17/NDUFS8/NDUFB2/COX5A/COX8A	10
hsa05012	Parkinson's disease	9/66	130/5894	1.19705e-05	0.000269816	0.000242361	NDUFA12/NDUFA8/NDUFA13/NDUFS3/NDUFA7/NDUFS8/NDUFB2/COX5A/COX8A	9
hsa05010	Alzheimer's disease	10/66	168/5894	1.43902e-05	0.000269816	0.000242361	IL1B/NDUFA12/NDUFA8/NDUFA13/NDUFS3/NDUFA7/NDUFS8/NDUFB2/COX5A/COX8A	10
hsa04623	Cytosolic DNA-sensing pathway	4/66	56/5894	0.00340345	0.0510518	0.045857	IL1B/ZBP1/POLR1C/AIM2	4
hsa05020	Prion diseases	3/66	36/5894	0.00735674	0.0919592	0.082602	IL1B/C1QB/SOD1	3

## Sheet: C3
ID	Description	GeneRatio	BgRatio	pvalue	p.adjust	qvalue	geneID	Count
hsa00620	Pyruvate metabolism	5/80	40/5894	0.000184214	0.0208162	0.0199727	AKR1B1/ACAT2/LDHB/MDH1/HAGHL	5
hsa03008	Ribosome biogenesis in eukaryotes	6/80	81/5894	0.000747366	0.0422262	0.0405151	DKC1/MPHOSPH10/IMP3/WDR36/FBL/TAF9	6
hsa05340	Primary immunodeficiency	4/80	35/5894	0.00119688	0.0450825	0.0432557	ICOS/CD3D/CD8A/IL7R	4
hsa04660	T cell receptor signaling pathway	6/80	108/5894	0.00329838	0.0931793	0.0894035	ICOS/CD3D/CBLB/CD3G/ITK/CD8A	6
